# Supplementary material for: Copper-catalyzed enantioselective diyne cyclizationviaC(sp2)–O bond cleavage
Source: Royal Society of Chemistry journal article supplement (doi:10.1039/d2sc06152j), 2023-01-01

## Supporting Information

### Copper-catalyzed enantioselective diyne cyclization via C(sp<sup>2</sup>)-O bond cleavage

Ji-Jia Zhou<sup>+</sup>, Ya-Nan Meng<sup>+</sup>, Li-Gao Liu, Yi-Xi Liu, Zhou Xu,<sup>\*</sup> Xin Lu,<sup>\*</sup> Bo Zhou,  
Long-Wu Ye<sup>\*</sup>

State Key Laboratory of Physical Chemistry of Solid Surfaces, Key Laboratory of  
Chemical Biology of Fujian Province, and College of Chemistry and Chemical  
Engineering, Xiamen University, Xiamen 361005, China

E-mail: [longwuye@xmu.edu.cn](mailto:longwuye@xmu.edu.cn); [xinlu@xmu.edu.cn](mailto:xinlu@xmu.edu.cn); [xuzhou@xzhmu.edu.cn](mailto:xuzhou@xzhmu.edu.cn)

| Content                                                         | Page Number |
|-----------------------------------------------------------------|-------------|
| General                                                         | 2           |
| More Reaction Condition Studies                                 | 3           |
| Preparation of Starting Materials                               | 5           |
| General Procedure: Copper Catalysis                             | 27          |
| Crystal Data                                                    | 60          |
| Computational Studies                                           | 61          |
| HPLC Chromatograms                                              | 128         |
| <sup>1</sup> H, <sup>13</sup> C and <sup>19</sup> F NMR Spectra | 156         |

**General Information.** Ethyl acetate (ACS grade), hexanes (ACS grade) and anhydrous 1,2-dichloroethane (ACS grade) and benzotrifluoride (ACS grade) were obtained commercially and used without further purification. Methylene chloride, tetrahydrofuran and diethyl ether were purified according to standard methods unless otherwise noted. Commercially available reagents were used without further purification. Reactions were monitored by thin layer chromatography (TLC) using silicycle pre-coated silica gel plates. Flash column chromatography was performed over silica gel (300-400 mesh). Infrared spectra were recorded on a Nicolet AVATER FTIR330 spectrometer as thin film and are reported in reciprocal centimeter ( $\text{cm}^{-1}$ ). Mass spectra were recorded with Micromass QTOF2 Quadrupole/Time-of-Flight Tandem mass spectrometer using electron spray ionization.

$^1\text{H}$  NMR spectra were recorded on a Bruker AV-400 spectrometer and a Bruker AV-500 spectrometer in chloroform-d. Chemical shifts are reported in ppm with the internal TMS signal at 0.0 ppm as a standard. The data is being reported as (s = singlet, d = doublet, t = triplet, m = multiplet or unresolved, brs = broad singlet, coupling constant(s) in Hz, integration).

$^{13}\text{C}$  NMR spectra were recorded on a Bruker AV-400 spectrometer and a Bruker AV-500 spectrometer in chloroform-d. Chemical shifts are reported in ppm with the internal chloroform signal at 77.0 ppm as a standard.

$^{19}\text{F}$  NMR spectra were recorded on a Bruker AV-400 spectrometer and a Bruker AV-500 spectrometer in chloroform-d. Chemical shifts are reported in ppm.

## More Reaction Condition Studies

**Supplementary Table 1.** Other reaction condition studies for the formation of (+)-**2a**.

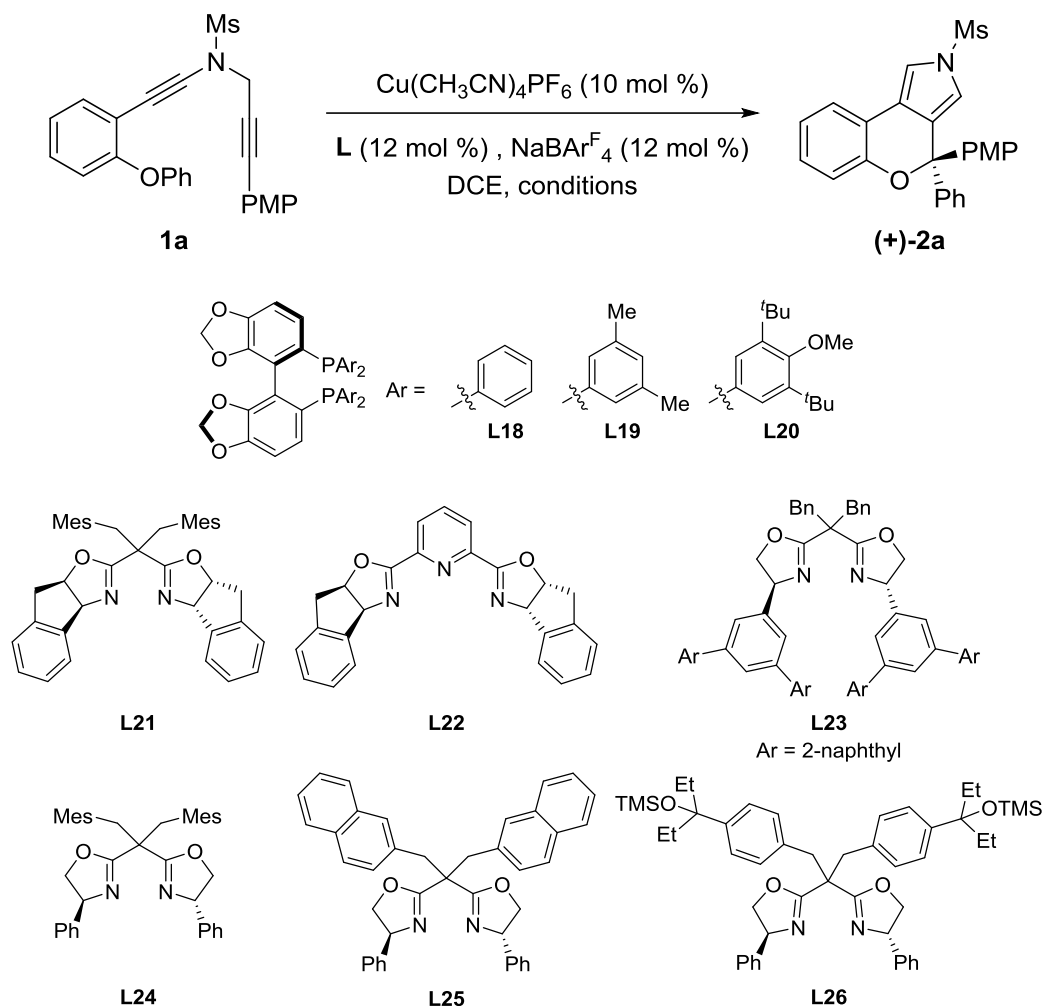

| Entry | L          | Conditions  | Yield (%) <sup>[a]</sup> | ee (%) <sup>[b]</sup> |
|-------|------------|-------------|--------------------------|-----------------------|
| 1     | <b>L18</b> | 40 °C, 10 h | 72                       | 12                    |
| 2     | <b>L19</b> | 40 °C, 10 h | 73                       | 24                    |
| 3     | <b>L20</b> | 40 °C, 72 h | <10                      | <10                   |
| 4     | <b>L21</b> | 40 °C, 72 h | 72                       | 39                    |
| 5     | <b>L22</b> | 40 °C, 72 h | 65                       | <10                   |
| 6     | <b>L23</b> | 40 °C, 96 h | 52                       | 18                    |
| 7     | <b>L24</b> | 40 °C, 24 h | 72                       | 74                    |
| 8     | <b>L25</b> | 40 °C, 20 h | 72                       | 59                    |
| 9     | <b>L26</b> | 40 °C, 20 h | 55                       | 76                    |

Reaction conditions: **1a** (0.05 mmol),  $\text{Cu}(\text{CH}_3\text{CN})_4\text{PF}_6$  (0.005 mmol), **L** (0.006 mmol),  $\text{NaBAR}_4^{\text{F}}$  (0.006 mmol), DCE (1 mL), in vials.  $\text{NaBAR}_4^{\text{F}}$  = sodium tetrakis[3,5-bis(trifluoromethyl)phenyl]borate.

[a] Measured by  $^1\text{H}$  NMR using 1,3,5-trimethoxybenzene as the internal standard.

[b] Determined by HPLC analysis.

**Supplementary Table 2.** Other reaction condition studies for the formation of (+)-**2a**.

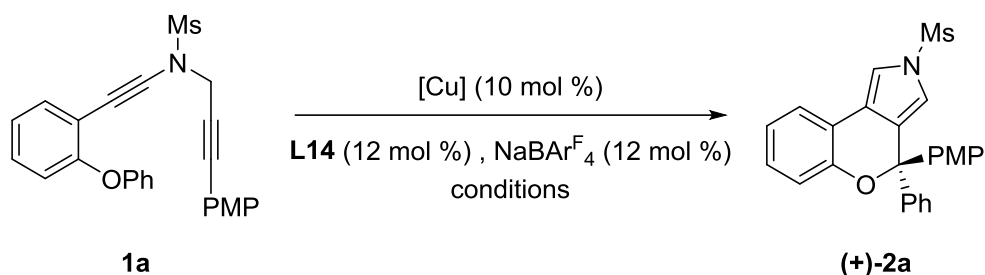

| Entry            | Catalyst                              | Conditions                      | Yield (%) <sup>[a]</sup> | ee (%) <sup>[b]</sup> |
|------------------|---------------------------------------|---------------------------------|--------------------------|-----------------------|
| 1                | Cu(MeCN) <sub>4</sub> PF <sub>6</sub> | DCE, 40 °C, 12 h                | 82                       | 92                    |
| 2 <sup>[c]</sup> | Cu(MeCN) <sub>4</sub> PF <sub>6</sub> | DCE, 40 °C, 12 h                | 82                       | 92                    |
| 3 <sup>[d]</sup> | Cu(MeCN) <sub>4</sub> PF <sub>6</sub> | DCE, 40 °C, 12 h                | 80                       | 92                    |
| 4 <sup>[e]</sup> | Cu(MeCN) <sub>4</sub> PF <sub>6</sub> | DCE, 40 °C, 24 h                | 78                       | 90                    |
| 5                | Cu(MeCN) <sub>4</sub> PF <sub>6</sub> | DCE, 30 °C, 50 h                | 72                       | 93                    |
| 6                | Cu(MeCN) <sub>4</sub> PF <sub>6</sub> | DCM, 30 °C, 50 h                | 72                       | 93                    |
| 7                | Cu(MeCN) <sub>4</sub> PF <sub>6</sub> | Et <sub>2</sub> O, 30 °C, 50 h  | <10                      | <10                   |
| 8                | Cu(MeCN) <sub>4</sub> PF <sub>6</sub> | PhMe, 30 °C, 50 h               | 74                       | 94                    |
| 9                | Cu(MeCN) <sub>4</sub> PF <sub>6</sub> | PhMe, 40 °C, 12 h               | 82                       | 93                    |
| 10               | Cu(MeCN) <sub>4</sub> PF <sub>6</sub> | <i>o</i> -xylene, 40 °C, 12 h   | 78                       | 93                    |
| 11               | Cu(MeCN) <sub>4</sub> PF <sub>6</sub> | PhF, 40 °C, 12 h                | 85                       | 92                    |
| 12               | Cu(MeCN) <sub>4</sub> PF <sub>6</sub> | PhCl, 40 °C, 12 h               | 84                       | 92                    |
| 13               | Cu(MeCN) <sub>4</sub> PF <sub>6</sub> | PhCF <sub>3</sub> , 40 °C, 12 h | 92                       | 94                    |
| 14               | Cu(MeCN) <sub>4</sub> BF <sub>4</sub> | PhCF <sub>3</sub> , 40 °C, 12 h | 90                       | 93                    |
| 15               | CuCl                                  | PhCF <sub>3</sub> , 40 °C, 30 h | 86                       | 93                    |
| 16               | CuI                                   | PhCF <sub>3</sub> , 40 °C, 12 h | 85                       | 93                    |
| 17               | CuOTf                                 | PhCF <sub>3</sub> , 40 °C, 12 h | 32                       | 88                    |
| 18               | Cu(OTf) <sub>2</sub>                  | PhCF <sub>3</sub> , 40 °C, 12 h | <10                      | <10                   |

Reaction conditions: **1a** (0.05 mmol), [Cu] (0.005 mmol), **L14** (0.006 mmol), NaBARF<sub>4</sub> (0.006 mmol), solvent (1 mL), in vials. NaBARF<sub>4</sub> = sodium tetrakis[3,5-bis(trifluoromethyl)phenyl]borate. [a] Measured by <sup>1</sup>H NMR using 1,3,5-trimethoxybenzene as the internal standard. [b] Determined by HPLC analysis. [c] Using 3 Å MS (30 mg/0.1 mmol) as additive. [d] Using 4 Å MS (30 mg/0.1 mmol) as additive. [e] Using 5 Å MS (30 mg/0.1 mmol) as additive.



**1. *N*-propargyl ynamides 1a-1ab and 1ag-1ai were prepared according to the following procedures.<sup>1-4</sup>**

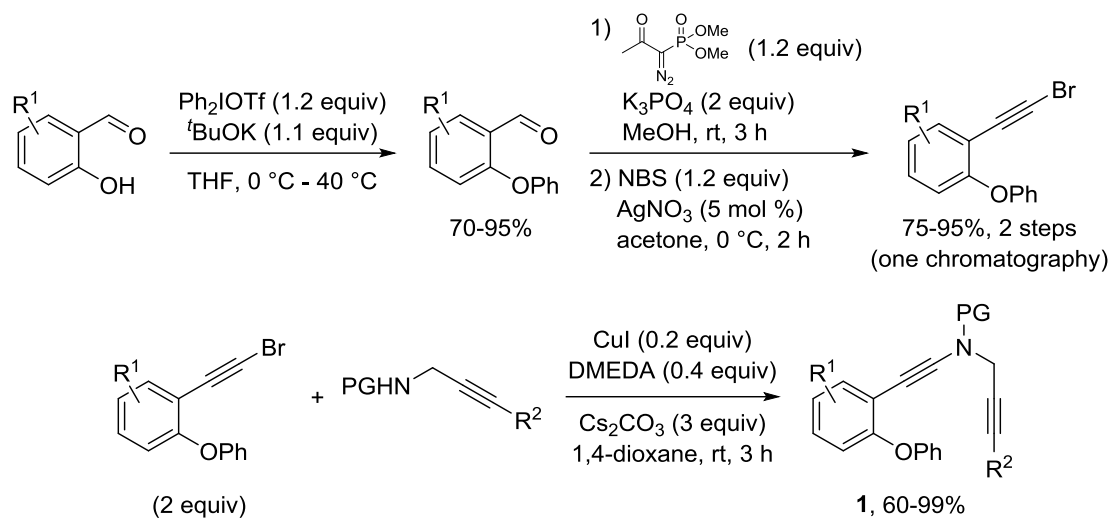

To a solution of salicylaldehyde derivative (3.0 mmol) in THF (10 mL) was added <sup>t</sup>BuOK (3.3 mmol, 370 mg) at 0 °C, the mixture solution was stirred at 0 °C for 0.5 h. Then, the Ph<sub>2</sub>IOTf (3.6 mmol, 1.55 g) was added to a stirred solution. The mixture solution was stirred at 40 °C for 6-10 h. The mixture was filtered, extracted by EtOAc and concentrated. The residue was purified by flash chromatography on silica gel (eluent: hexanes/EtOAc) to afford the desired product (70-95%).<sup>1</sup>

To a solution of above product (2.7 mmol) in MeOH (15 mL) was added K<sub>3</sub>PO<sub>4</sub> (5.4 mmol, 1.15 g) and dimethyl(1-diazo-2-oxopropyl)phosphonate (3.2 mmol, 622 mg) in sequence. The mixture solution was stirred at 25 °C for 3-8 h. The mixture was filtered, extracted by EtOAc and concentrated.<sup>2</sup> Then, NBS (3.2 mmol, 570 mg) and AgNO<sub>3</sub> (0.14 mmol, 23 mg) were added to a solution of the above crude product in acetone (15 mL) at 0 °C for about 1 h and the progress of the reaction was monitored by TLC. The solution was then concentrated under a reduced pressure, filtered and washed with hexanes, concentrated again under a reduced pressure to give the product without further purification (75-95%, 2 steps).<sup>3</sup>

To a dry flask was added CuI (0.2 mmol, 38 mg), DMEDA (0.4 mmol, 35 mg), Cs<sub>2</sub>CO<sub>3</sub> (3.0 mmol, 977 mg), protected propargylamide derivative (1.0 mmol) and 1,4-dioxane (10 mL). To the mixture solution of the above product (2.0 mmol) was added. The reaction was stirred at rt for 2-6 h until the reaction was complete monitored by TLC.

Next, the mixture solution was filtered and concentrated to afford the crude product. The residue was purified by chromatography on silica gel (eluent: hexanes/EtOAc) to afford the desired product **1** (60-99%).<sup>4</sup>

***N*-(3-(4-methoxyphenyl)prop-2-yn-1-yl)-*N*-((2-phenoxyphenyl)ethynyl)methanesulfonamide (**1a**)**

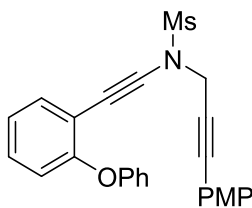

**1a**

The product **1a** was afforded as a pale yellow oil (90%, 388.4 mg). <sup>1</sup>H NMR (400 MHz, CDCl<sub>3</sub>) δ 7.50 (dd, *J* = 7.6, 1.6 Hz, 1H), 7.32 (dd, *J* = 8.8, 1.6 Hz, 2H), 7.29 – 7.21 (m, 3H), 7.14 – 7.06 (m, 1H), 7.05 – 6.99 (m, 1H), 6.96 (dd, *J* = 8.4, 0.8 Hz, 1H), 6.92 (dd, *J* = 8.4, 0.8 Hz, 2H), 6.80 (d, *J* = 8.8 Hz, 2H), 4.40 (s, 2H), 3.79 (s, 3H), 3.00 (s, 3H); <sup>13</sup>C NMR (100 MHz, CDCl<sub>3</sub>) δ 160.0, 157.4, 156.9, 133.6, 133.3, 129.7, 129.6, 123.8, 122.7, 119.8, 117.6, 115.3, 114.0, 113.7, 86.9, 86.0, 80.1, 66.9, 55.2, 43.0, 38.3; IR (neat): 2961, 2932, 2838, 2239(s), 1606, 1509, 1363, 1167, 757, 518; HRESIMS Calcd for [C<sub>25</sub>H<sub>21</sub>NNaO<sub>4</sub>S]<sup>+</sup> (*M* + Na<sup>+</sup>) 454.1083, found 454.1072.

***N*-(3-(4-methoxyphenyl)prop-2-yn-1-yl)-*N*-((2-phenoxyphenyl)ethynyl)propane-1-sulfonamide (**1b**)**

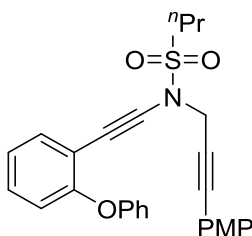

**1b**

The product **1b** was afforded as a pale yellow oil (99%, 459.6 mg). <sup>1</sup>H NMR (400 MHz, CDCl<sub>3</sub>) δ 7.48 (dd, *J* = 7.6, 1.2 Hz, 1H), 7.31 (d, *J* = 8.8 Hz, 2H), 7.28 – 7.20 (m, 3H), 7.10 – 7.05 (m, 1H), 7.05 – 6.99 (m, 1H), 6.93 (dd, *J* = 8.0, 2.8 Hz, 3H), 6.80 (d, *J* =

8.8 Hz, 2H), 4.40 (s, 2H), 3.77 (s, 3H), 3.23 – 3.13 (m, 2H), 1.93 – 1.81 (m, 2H), 0.92 (t,  $J = 7.6$  Hz, 3H);  $^{13}\text{C}$  NMR (100 MHz,  $\text{CDCl}_3$ )  $\delta$  159.8, 157.3, 156.8, 133.3, 133.1, 129.5, 129.4, 123.6, 122.7, 119.5, 117.6, 115.4, 113.8(4), 113.7(5), 86.4, 86.3, 80.5, 66.6, 55.1, 53.8, 42.6, 16.7, 12.7; IR (neat): 2971, 2935, 2838, 2239(s), 1605, 1486, 1091, 753, 538; HRESIMS Calcd for  $[\text{C}_{27}\text{H}_{25}\text{NKO}_4\text{S}]^+$  ( $\text{M} + \text{K}^+$ ) 498.1136, found 498.1127.

***N*-(3-(4-methoxyphenyl)prop-2-yn-1-yl)-*N*-((2-phenoxyphenyl)ethynyl)propane-2-sulfonamide (1c)**

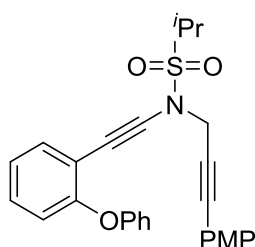

**1c**

The product **1c** was afforded as a pale yellow oil (98%, 449.1 mg).  $^1\text{H}$  NMR (400 MHz,  $\text{CDCl}_3$ )  $\delta$  7.47 (dd,  $J = 8.0, 1.2$  Hz, 1H), 7.31 (d,  $J = 8.8$  Hz, 2H), 7.28 – 7.20 (m, 3H), 7.11 – 7.04 (m, 1H), 7.04 – 6.98 (m, 1H), 6.93 (d,  $J = 8.8$  Hz, 1H), 6.90 (d,  $J = 8.0$  Hz, 2H), 6.79 (d,  $J = 8.8$  Hz, 2H), 4.41 (s, 2H), 3.76 (s, 3H), 3.45 (hept,  $J = 6.8$  Hz, 1H), 1.36 (d,  $J = 6.8$  Hz, 6H);  $^{13}\text{C}$  NMR (100 MHz,  $\text{CDCl}_3$ )  $\delta$  159.8, 157.4, 156.5, 133.3, 133.1, 129.4, 129.3, 123.7, 122.5, 119.7, 117.4, 115.7, 113.9, 113.8, 86.6, 86.2, 80.6, 66.4, 55.1, 54.7, 42.6, 16.2; IR (neat): 2977, 2936, 2838, 2238(s), 1605, 1509, 1150, 757, 592; HRESIMS Calcd for  $[\text{C}_{27}\text{H}_{25}\text{NNaO}_4\text{S}]^+$  ( $\text{M} + \text{Na}^+$ ) 482.1397, found 482.1408.

**4-Bromo-*N*-(3-(4-methoxyphenyl)prop-2-yn-1-yl)-*N*-((2-phenoxyphenyl)ethynyl)benzenesulfonamide (1d)**

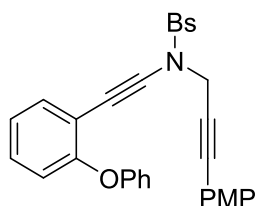

### 1d

The product **1d** was afforded as a pale yellow oil (85%, 485.8 mg). <sup>1</sup>H NMR (400 MHz, CDCl<sub>3</sub>) δ 7.78 (d, *J* = 7.6 Hz, 2H), 7.45 (d, *J* = 6.8 Hz, 1H), 7.41 – 7.18 (m, 5H), 7.17 – 6.84 (m, 7H), 6.75 (d, *J* = 7.6 Hz, 2H), 4.44 (s, 2H), 3.80 (s, 3H); <sup>13</sup>C NMR (100 MHz, CDCl<sub>3</sub>) δ 159.8, 157.4, 157.2, 136.2, 133.5, 133.1, 132.0, 129.8, 129.7, 129.5, 128.9, 123.4, 123.3, 118.9, 118.5, 114.9, 113.9, 113.8, 86.9, 85.8, 79.4, 67.1, 55.3, 43.3; IR (neat): 2956, 2933, 2838, 2239(s), 1605, 1509, 1174, 750. 607; HRESIMS Calcd for [C<sub>30</sub>H<sub>22</sub>BrNNaO<sub>4</sub>S]<sup>+</sup> (M + Na<sup>+</sup>) 594.0345, found 594.0327.

### *N*-(3-(4-methoxyphenyl)prop-2-yn-1-yl)-4-nitro-*N*-((2-phenoxyphenyl)ethynyl)-benzenesulfonamide (**1e**)

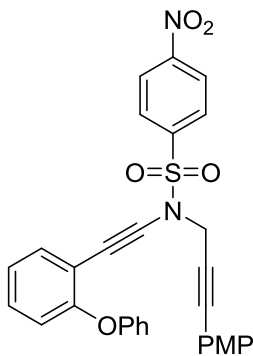

### 1e

The product **1e** was afforded as a pale yellow oil (72%, 387.8 mg). <sup>1</sup>H NMR (400 MHz, CDCl<sub>3</sub>) δ 8.08 (d, *J* = 8.8 Hz, 2H), 7.93 (d, *J* = 8.8 Hz, 2H), 7.47 (dd, *J* = 7.6, 1.2 Hz, 1H), 7.39 – 7.29 (m, 2H), 7.29 – 7.21 (m, 1H), 7.18 – 7.10 (m, 1H), 7.10 – 7.03 (m, 1H), 7.01 – 6.91 (m, 4H), 6.88 (d, *J* = 8.0 Hz, 1H), 6.68 (d, *J* = 8.8 Hz, 2H), 4.50 (s, 2H), 3.76 (s, 3H); <sup>13</sup>C NMR (100 MHz, CDCl<sub>3</sub>) δ 160.0, 157.6, 157.0, 150.1, 142.5, 133.5, 132.9, 129.9, 129.8, 129.4, 123.7, 123.5, 123.4, 118.7, 118.5, 114.4, 113.8, 113.2, 87.2, 85.0, 79.2, 67.3, 55.2, 43.6; IR (neat): 3104, 2925, 2839, 2240(s), 1606, 1509, 1177, 1032, 752, 612; HRESIMS Calcd for [C<sub>30</sub>H<sub>22</sub>N<sub>2</sub>NaO<sub>6</sub>S]<sup>+</sup> (M + Na<sup>+</sup>) 561.1091, found 561.1077.

### *N*-(3-(4-methoxyphenyl)prop-2-yn-1-yl)-*N*-((2-phenoxyphenyl)ethynyl)-4-(trifluoromethyl)benzenesulfonamide (**1f**)

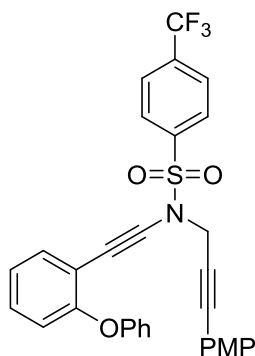

**1f**

The product **1f** was afforded as a pale yellow oil (93%, 522.3 mg).  $^1\text{H}$  NMR (400 MHz,  $\text{CDCl}_3$ )  $\delta$  8.05 (d,  $J = 8.0$  Hz, 2H), 7.46 (dd,  $J = 8.0, 1.6$  Hz, 1H), 7.41 (d,  $J = 8.0$  Hz, 2H), 7.35 – 7.26 (m, 2H), 7.26 – 7.18 (m, 1H), 7.14 – 7.07 (m, 1H), 7.07 – 7.00 (m, 1H), 6.95 (d,  $J = 8.0$  Hz, 2H), 6.92 (d,  $J = 8.8$  Hz, 2H), 6.87 (d,  $J = 8.0$  Hz, 1H), 6.69 (d,  $J = 8.8$  Hz, 2H), 4.47 (s, 2H), 3.74 (s, 3H);  $^{13}\text{C}$  NMR (100 MHz,  $\text{CDCl}_3$ )  $\delta$  159.8, 157.5, 157.1, 140.6, 134.6 (q,  $J = 33.0$  Hz), 133.4, 132.9, 129.7, 129.6, 128.7, 125.7 (q,  $J = 3.0$  Hz), 123.3, 123.0 (q,  $J = 271.0$  Hz), 118.7, 118.5, 114.6, 113.7, 113.4, 87.0, 85.4, 79.1, 67.0, 55.1, 43.3;  $^{19}\text{F}$  NMR (376 MHz,  $\text{CDCl}_3$ )  $\delta$  -63.3; IR (neat): 3059, 2936, 2839, 2240(s), 1607, 1487, 922, 753, 606; HRESIMS Calcd for  $[\text{C}_{31}\text{H}_{22}\text{F}_3\text{NNaO}_4\text{S}]^+$  ( $\text{M} + \text{Na}^+$ ) 584.1114, found 584.1101.

***N*-(3-(4-methoxyphenyl)prop-2-yn-1-yl)-4-methyl-*N*-((2-phenoxyphenyl)ethynyl)benzenesulfonamide (**1g**)**

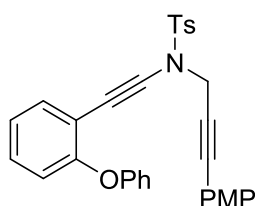

**1g**

The product **1g** was afforded as a pale yellow oil (85%, 431.5 mg).  $^1\text{H}$  NMR (400 MHz,  $\text{CDCl}_3$ )  $\delta$  7.81 (d,  $J = 6.0$  Hz, 2H), 7.44 (d,  $J = 6.0$  Hz, 1H), 7.38 – 7.15 (m, 3H), 7.15 – 6.99 (m, 6H), 6.99 – 6.81 (m, 3H), 6.72 (d,  $J = 6.0$  Hz, 2H), 4.39 (s, 2H), 3.76 (s, 3H), 2.24 (s, 3H);  $^{13}\text{C}$  NMR (100 MHz,  $\text{CDCl}_3$ )  $\delta$  159.6, 157.2, 144.5, 134.2, 133.3, 133.0, 129.6, 129.3, 129.1, 128.1, 123.2, 123.0, 118.8, 118.5, 115.2, 114.1, 113.6, 86.4, 86.3,

79.7, 66.8, 55.2, 42.9, 21.4; IR (neat): 3063, 2933, 2838, 2238(s), 1606, 1509, 1486, 1170, 754, 589; HRESIMS Calcd for  $[C_{31}H_{25}NNaO_4S]^+$  ( $M + Na^+$ ) 530.1397, found 530.1382.

**4-methoxy-*N*-(3-(4-methoxyphenyl)prop-2-yn-1-yl)-*N*-((2-phenoxyphenyl)ethynyl)benzenesulfonamide (1h)**

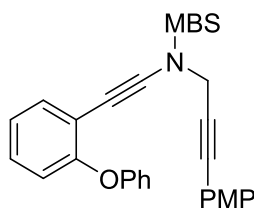

**1h**

The product **1h** was afforded as a pale yellow oil (75%, 392.7 mg).  $^1H$  NMR (400 MHz,  $CDCl_3$ )  $\delta$  7.86 (d,  $J = 8.8$  Hz, 2H), 7.44 (dd,  $J = 7.6, 1.6$  Hz, 1H), 7.30 (dd,  $J = 8.4, 7.6$  Hz, 2H), 7.23 – 7.15 (m, 1H), 7.12 – 7.00 (m, 4H), 6.97 (d,  $J = 7.6$  Hz, 2H), 6.86 (d,  $J = 8.4$  Hz, 1H), 6.71 (d,  $J = 8.8$  Hz, 2H), 6.67 (d,  $J = 8.8$  Hz, 2H), 4.39 (s, 2H), 3.76 (s, 3H), 3.64 (s, 3H);  $^{13}C$  NMR (100 MHz,  $CDCl_3$ )  $\delta$  163.5, 159.6, 157.2(3), 157.1(9), 133.3, 133.1, 130.4, 129.6, 129.1, 128.7, 123.2, 123.1, 118.7, 118.6, 115.2, 114.1, 113.9, 113.6, 86.5, 86.3, 79.8, 66.8, 55.3, 55.2, 42.9; IR (neat): 2966, 2839, 2237(s), 1595, 1509, 1367, 1164, 833, 590, 558; HRESIMS Calcd for  $[C_{31}H_{25}NNaO_5S]^+$  ( $M + Na^+$ ) 546.1346, found 546.1334.

***N*-(3-(4-methoxyphenyl)prop-2-yn-1-yl)-*N*-((4-methyl-2-phenoxyphenyl)ethynyl)methanesulfonamide (1i)**

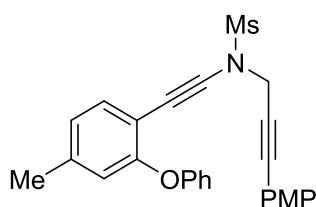

**1i**

The product **1i** was afforded as a pale yellow oil (99%, 441.0 mg).  $^1H$  NMR (400 MHz,  $CDCl_3$ )  $\delta$  7.38 (d,  $J = 7.6$  Hz, 1H), 7.31 (d,  $J = 8.8$  Hz, 2H), 7.26 – 7.19 (m, 2H), 7.03

– 6.96 (m, 1H), 6.94– 6.87 (m, 3H), 6.79 (d,  $J = 8.8$  Hz, 3H), 4.37 (s, 2H), 3.77 (s, 3H), 2.96 (s, 3H), 2.27 (s, 3H);  $^{13}\text{C}$  NMR (100 MHz,  $\text{CDCl}_3$ )  $\delta$  159.9, 157.4, 156.7, 140.5, 133.4, 133.2, 129.5, 124.7, 122.5, 120.4, 117.4, 113.8, 113.6, 112.1, 86.7, 85.2, 80.1, 66.8, 55.1, 42.9, 38.0, 21.3; IR (neat): 2958, 2931, 2839, 2241(s), 1606, 1360, 1166, 964, 738, 518; HRESIMS Calcd for  $[\text{C}_{26}\text{H}_{23}\text{NNaO}_4\text{S}]^+$  ( $\text{M} + \text{Na}^+$ ) 468.1240, found 468.1224.

***N*-((4-methoxy-2-phenoxyphenyl)ethynyl)-*N*-(3-(4-methoxyphenyl)prop-2-yn-1-yl)methanesulfonamide (**1j**)**

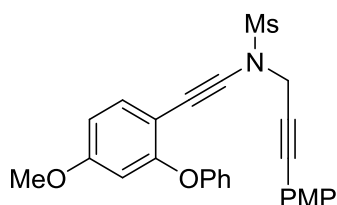

**1j**

The product **1j** was afforded as a pale yellow oil (60%, 276.9 mg).  $^1\text{H}$  NMR (400 MHz,  $\text{CDCl}_3$ )  $\delta$  7.42 (d,  $J = 8.4$  Hz, 1H), 7.31 (d,  $J = 8.4$  Hz, 2H), 7.28 – 7.18 (m, 2H), 7.06 – 6.97 (m, 1H), 6.92 (d,  $J = 8.0$  Hz, 2H), 6.79 (d,  $J = 8.4$  Hz, 2H), 6.64 (dd,  $J = 8.4, 2.4$  Hz, 1H), 6.50 (d,  $J = 2.4$  Hz, 1H), 4.39 (s, 2H), 3.77 (s, 3H), 3.71 (s, 3H), 2.95 (s, 3H);  $^{13}\text{C}$  NMR (100 MHz,  $\text{CDCl}_3$ )  $\delta$  161.0, 159.9, 158.4, 157.0, 134.8, 133.1, 129.5, 122.7, 117.6, 113.8, 113.6, 109.5, 106.9, 105.7, 86.6, 84.5, 80.2, 66.5, 55.3, 55.1, 42.9, 37.8; IR (neat): 3010, 2934, 2839, 2242(s), 1608, 1509, 1362, 1031, 834, 525; HRESIMS Calcd for  $[\text{C}_{26}\text{H}_{23}\text{NNaO}_5\text{S}]^+$  ( $\text{M} + \text{Na}^+$ ) 484.1189, found 484.1179.

***N*-((4-fluoro-2-phenoxyphenyl)ethynyl)-*N*-(3-(4-methoxyphenyl)prop-2-yn-1-yl)methanesulfonamide (**1k**)**

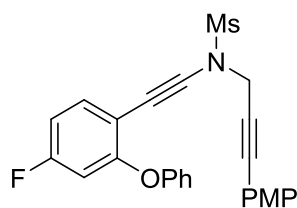

**1k**

The product **1k** was afforded as a pale yellow oil (83%, 373.1 mg). <sup>1</sup>H NMR (400 MHz, CDCl<sub>3</sub>) δ 7.46 (dd, *J* = 8.8, 6.4 Hz, 1H), 7.35 – 7.24 (m, 4H), 7.12 – 7.05 (m, 1H), 6.96 (d, *J* = 7.6 Hz, 2H), 6.78 (d, *J* = 8.8 Hz, 3H), 6.61 (dd, *J* = 9.6, 2.4 Hz, 1H), 4.43 (s, 2H), 3.77 (s, 3H), 3.06 (s, 3H); <sup>13</sup>C NMR (100 MHz, CDCl<sub>3</sub>) δ 162.8 (d, *J* = 249.0 Hz), 159.9, 158.8 (d, *J* = 11.0 Hz), 156.2, 134.8 (d, *J* = 10.0 Hz), 133.1, 129.7, 123.7, 118.4, 113.9, 113.5, 110.5(1) (d, *J* = 3.0 Hz), 110.4(9) (d, *J* = 22.0 Hz), 106.4 (d, *J* = 25.0 Hz), 86.8, 85.5, 80.0, 65.9, 55.1, 42.8, 38.1; <sup>19</sup>F NMR (376 MHz, CDCl<sub>3</sub>) δ -107.6; IR (neat): 3012, 2933, 2838, 2243(s), 1605, 1505, 1034, 834, 517; HRESIMS Calcd for [C<sub>25</sub>H<sub>20</sub>FNNaO<sub>4</sub>S]<sup>+</sup> (M + Na<sup>+</sup>) 472.0989, found 472.0976.

***N*-((4-chloro-2-phenoxyphenyl)ethynyl)-*N*-(3-(4-methoxyphenyl)prop-2-yn-1-yl)methanesulfonamide (**1l**)**

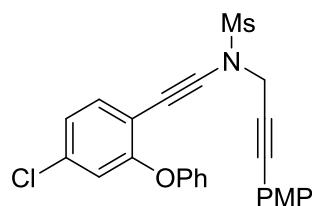

**1l**

The product **1l** was afforded as a pale yellow oil (91%, 424.0 mg). <sup>1</sup>H NMR (400 MHz, CDCl<sub>3</sub>) δ 7.41 (d, *J* = 8.0 Hz, 1H), 7.35 – 7.25 (m, 4H), 7.10 (d, *J* = 7.6 Hz, 1H), 7.06 (dd, *J* = 8.4, 1.6 Hz, 1H), 6.95 (d, *J* = 8.0 Hz, 2H), 6.91 (d, *J* = 1.6 Hz, 1H), 6.79 (d, *J* = 8.4 Hz, 2H), 4.43 (s, 2H), 3.80 (s, 3H), 3.05 (s, 3H); <sup>13</sup>C NMR (100 MHz, CDCl<sub>3</sub>) δ 160.0, 157.9, 156.4, 134.9, 134.2, 133.3, 129.8, 123.8, 123.6, 119.3, 118.3, 114.0, 113.6, 113.4, 87.0, 86.7, 80.0, 66.2, 55.2, 43.0, 38.4; IR (neat): 3012, 2932, 2838, 2241(s), 1606, 1486, 1363, 1034, 929, 515; HRESIMS Calcd for [C<sub>25</sub>H<sub>20</sub>ClNNaO<sub>4</sub>S]<sup>+</sup> (M + Na<sup>+</sup>) 488.0694, found 488.0675.

***N*-((4-bromo-2-phenoxyphenyl)ethynyl)-*N*-(3-(4-methoxyphenyl)prop-2-yn-1-yl)methanesulfonamide (**1m**)**



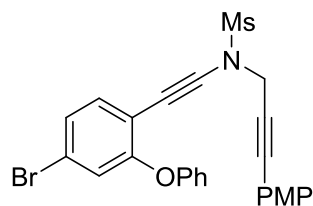

**1m**

The product **1m** was afforded as a pale yellow oil (76%, 387.9 mg).  $^1\text{H}$  NMR (400 MHz,  $\text{CDCl}_3$ )  $\delta$  7.36 – 7.26 (m, 5H), 7.21 (dd,  $J = 8.4, 2.0$  Hz, 1H), 7.12 – 7.07 (m, 1H), 7.06 (d,  $J = 2.0$  Hz, 1H), 6.95 (d,  $J = 8.0$  Hz, 2H), 6.79 (d,  $J = 8.8$  Hz, 2H), 4.43 (s, 2H), 3.79 (s, 3H), 3.05 (s, 3H);  $^{13}\text{C}$  NMR (100 MHz,  $\text{CDCl}_3$ )  $\delta$  160.0, 157.8, 156.5, 134.3, 133.3, 129.8, 126.7, 123.6, 122.6, 122.2, 118.3, 114.0, 113.6, 87.0, 86.9, 80.0, 66.3, 55.2, 42.9, 38.4; IR (neat): 2961, 2930, 2838, 2240(s), 1606, 1509, 1364, 1166, 923, 833; HRESIMS Calcd for  $[\text{C}_{25}\text{H}_{20}\text{BrNNaO}_4\text{S}]^+$  ( $\text{M} + \text{Na}^+$ ) 532.0189, found 532.0196.

***N*-(3-(4-methoxyphenyl)prop-2-yn-1-yl)-*N*-((5-methyl-2-phenoxyphenyl)ethynyl)methanesulfonamide (1n)**

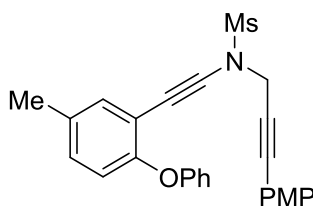

**1n**

The product **1n** was afforded as a pale yellow oil (90%, 401.0 mg).  $^1\text{H}$  NMR (400 MHz,  $\text{CDCl}_3$ )  $\delta$  7.32 (d,  $J = 8.8$  Hz, 2H), 7.30 (d,  $J = 1.6$  Hz, 1H), 7.25 – 7.16 (m, 2H), 7.07 (dd,  $J = 8.4, 1.6$  Hz, 1H), 7.00 – 6.94 (m, 1H), 6.88 (d,  $J = 8.4$  Hz, 3H), 6.80 (d,  $J = 8.8$  Hz, 2H), 4.36 (s, 2H), 3.78 (s, 3H), 2.95 (s, 3H), 2.29 (s, 3H);  $^{13}\text{C}$  NMR (100 MHz,  $\text{CDCl}_3$ )  $\delta$  159.9, 157.8, 154.2, 133.8, 133.6, 133.2, 130.4, 129.4, 122.2, 120.2, 117.0, 115.1, 113.9, 113.7, 86.8, 85.7, 80.1, 67.0, 55.1, 42.9, 38.1, 20.4; IR (neat): 2957, 2930, 2838, 2243(s), 1606, 1487, 1363, 1035, 833, 521; HRESIMS Calcd for  $[\text{C}_{26}\text{H}_{23}\text{NNaO}_4\text{S}]^+$  ( $\text{M} + \text{Na}^+$ ) 468.1240, found 468.1233.

***N*-((5-fluoro-2-phenoxyphenyl)ethynyl)-*N*-(3-(4-methoxyphenyl)prop-2-yn-1-yl)methanesulfonamide (1o)**

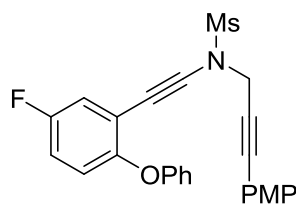

**1o**

The product **1o** was afforded as a pale yellow oil (82%, 368.6 mg).  $^1\text{H}$  NMR (400 MHz,  $\text{CDCl}_3$ )  $\delta$  7.32 (d,  $J = 8.8$  Hz, 2H), 7.28 – 7.21 (m, 2H), 7.18 (dd,  $J = 8.4, 2.8$  Hz, 1H), 7.05 – 6.92 (m, 3H), 6.92 – 6.86 (m, 2H), 6.82 (d,  $J = 8.8$  Hz, 2H), 4.37 (s, 2H), 3.79 (s, 3H), 2.97 (s, 3H);  $^{13}\text{C}$  NMR (100 MHz,  $\text{CDCl}_3$ )  $\delta$  160.0, 158.4 (d,  $J = 243.0$  Hz), 157.6, 152.5 (d,  $J = 2.0$  Hz), 133.3, 129.6, 122.6, 121.6 (d,  $J = 8.0$  Hz), 119.4 (d,  $J = 25.0$  Hz), 117.1 (d,  $J = 11.0$  Hz), 117.0, 116.4 (d,  $J = 23.0$  Hz), 113.9, 113.6, 87.0, 86.9, 79.9, 66.2 (d,  $J = 3.0$  Hz), 55.2, 42.9, 38.4;  $^{19}\text{F}$  NMR (376 MHz,  $\text{CDCl}_3$ )  $\delta$  -118.5; IR (neat): 2931, 2839, 2245(s), 1606, 1510, 1486, 1250, 1167, 833, 522; HRESIMS Calcd for  $[\text{C}_{25}\text{H}_{20}\text{FNNaO}_4\text{S}]^+$  ( $\text{M} + \text{Na}^+$ ) 472.0989, found 472.0984.

***N*-((5-chloro-2-phenoxyphenyl)ethynyl)-*N*-(3-(4-methoxyphenyl)prop-2-yn-1-yl)methanesulfonamide (**1p**)**

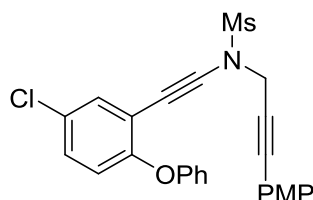

**1p**

The product **1p** was afforded as a pale yellow oil (87%, 405.3 mg).  $^1\text{H}$  NMR (400 MHz,  $\text{CDCl}_3$ )  $\delta$  7.46 (d,  $J = 2.4$  Hz, 1H), 7.32 (d,  $J = 8.8$  Hz, 2H), 7.30 – 7.26 (m, 2H), 7.22 (dd,  $J = 8.8, 2.4$  Hz, 1H), 7.08 – 7.02 (m, 1H), 6.92 (d,  $J = 7.6$  Hz, 2H), 6.89 (d,  $J = 8.8$  Hz, 1H), 6.82 (d,  $J = 8.8$  Hz, 2H), 4.41 (s, 2H), 3.81 (s, 3H), 3.03 (s, 3H);  $^{13}\text{C}$  NMR (100 MHz,  $\text{CDCl}_3$ )  $\delta$  160.1, 157.1, 155.5, 133.3, 132.8, 129.7, 129.5, 128.7, 123.2, 120.8, 117.8, 116.9, 114.0, 113.7, 87.2, 87.0, 79.9, 66.2, 55.3, 43.0, 38.6; IR (neat): 3012, 2931, 2838, 2240(s), 1606, 1509, 1364, 1167, 834, 518; HRESIMS Calcd for  $[\text{C}_{25}\text{H}_{20}\text{ClNNaO}_4\text{S}]^+$  ( $\text{M} + \text{Na}^+$ ) 488.0694, found 488.0692.

***N*-((4-methoxy-2-phenoxyphenyl)ethynyl)-*N*-(3-(4-methoxyphenyl)prop-2-yn-1-yl)methanesulfonamide (**1q**)**

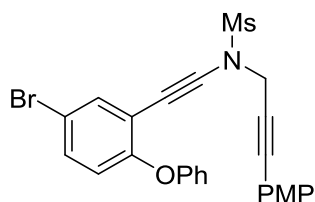

**1q**

The product **1q** was afforded as a pale yellow oil (60%, 306.2 mg).  $^1\text{H}$  NMR (400 MHz,  $\text{CDCl}_3$ )  $\delta$  7.61 (d,  $J = 2.4$  Hz, 1H), 7.35 (dd,  $J = 8.8, 2.4$  Hz, 1H), 7.32 (d,  $J = 8.8$  Hz, 2H), 7.30 – 7.21 (m, 2H), 7.09 – 7.01 (m, 1H), 6.92 (d,  $J = 8.0$  Hz, 2H), 6.81 (dd,  $J = 8.8, 2.4$  Hz, 3H), 4.40 (s, 2H), 3.80 (s, 3H), 3.03 (s, 3H);  $^{13}\text{C}$  NMR (100 MHz,  $\text{CDCl}_3$ )  $\delta$  160.0, 156.9, 156.0, 135.7, 133.3, 132.4, 129.7, 123.2, 121.0, 117.8, 117.2, 115.9, 114.0, 113.6, 87.3, 87.0, 79.9, 66.0, 55.2, 42.9, 38.5; IR (neat): 2931, 2838, 2239(s), 1606, 1509, 1480, 1364, 1167, 834, 518; HRESIMS Calcd for  $[\text{C}_{25}\text{H}_{20}\text{BrNNaO}_4\text{S}]^+$  (M +  $\text{Na}^+$ ) 532.0189, found 532.0177.

***N*-((3-bromo-2-phenoxyphenyl)ethynyl)-*N*-(3-(4-methoxyphenyl)prop-2-yn-1-yl)methanesulfonamide (**1r**)**

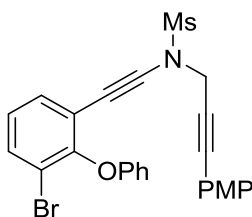

**1r**

The product **1r** was afforded as a pale yellow oil (62%, 316.0 mg).  $^1\text{H}$  NMR (400 MHz,  $\text{CDCl}_3$ )  $\delta$  7.58 (dd,  $J = 8.0, 1.2$  Hz, 1H), 7.44 (dd,  $J = 8.0, 1.2$  Hz, 1H), 7.35 (d,  $J = 8.8$  Hz, 2H), 7.22 – 7.14 (m, 2H), 7.09 – 7.02 (m, 1H), 6.98 – 6.91 (m, 1H), 6.85 (d,  $J = 8.8$  Hz, 2H), 6.82 (d,  $J = 8.0$  Hz, 2H), 4.28 (s, 2H), 3.79 (s, 3H), 2.80 (s, 3H);  $^{13}\text{C}$  NMR (100 MHz,  $\text{CDCl}_3$ )  $\delta$  160.0, 157.1, 151.9, 133.4, 133.3, 132.3, 129.4, 126.1, 122.0, 119.2, 117.8, 115.1, 114.0, 113.5, 87.3, 86.8, 79.9, 66.2, 55.2, 42.8, 38.3; IR (neat):

3012, 2931, 2838, 2238(s), 1606, 1509, 1363, 1167, 1034, 752; HRESIMS Calcd for  $[\text{C}_{25}\text{H}_{20}\text{BrNNaO}_4\text{S}]^+$  ( $\text{M} + \text{Na}^+$ ) 532.0189, found 532.0181.

***N*-((2-chloro-6-phenoxyphenyl)ethynyl)-*N*-(3-(4-methoxyphenyl)prop-2-yn-1-yl)methanesulfonamide (**1s**)**

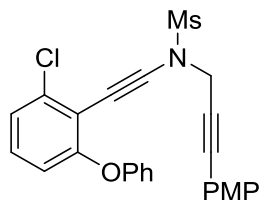

**1s**

The product **1s** was afforded as a pale yellow oil (67%, 312.2 mg).  $^1\text{H}$  NMR (400 MHz,  $\text{CDCl}_3$ )  $\delta$  7.38 – 7.25 (m, 4H), 7.21 – 7.11 (m, 2H), 7.10 – 7.04 (m, 1H), 6.95 (d,  $J = 8.0$  Hz, 2H), 6.88 – 6.74 (m, 3H), 4.44 (s, 2H), 3.78 (s, 3H), 3.12 (s, 3H);  $^{13}\text{C}$  NMR (100 MHz,  $\text{CDCl}_3$ )  $\delta$  160.0, 158.0, 156.6, 137.0, 133.3, 129.7, 129.0, 124.2, 123.4, 118.2, 117.1, 115.5, 113.9, 113.6, 91.0, 86.9, 79.9, 64.7, 55.2, 43.0, 38.5; IR (neat): 2931, 2838, 2239(s), 1606, 1509, 1480, 1364, 1167, 834, 518; HRESIMS Calcd for  $[\text{C}_{25}\text{H}_{20}\text{ClNNaO}_4\text{S}]^+$  ( $\text{M} + \text{Na}^+$ ) 488.0694, found 488.0692.

***N*-((5-bromo-2-phenoxyphenyl)ethynyl)-*N*-(3-(4-methoxyphenyl)prop-2-yn-1-yl)methanesulfonamide (**1t**)**

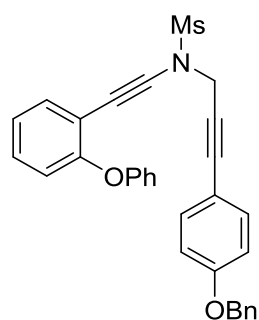

**1t**

The product **1t** was afforded as a pale yellow oil (77%, 390.9 mg).  $^1\text{H}$  NMR (400 MHz,  $\text{CDCl}_3$ )  $\delta$  7.50 (d,  $J = 7.2$  Hz, 1H), 7.45 – 7.15 (m, 10H), 7.15 – 7.05 (m, 1H), 7.05 – 6.94 (m, 2H), 6.92 (d,  $J = 8.0$  Hz, 2H), 6.88 (d,  $J = 8.0$  Hz, 2H), 5.06 (s, 2H), 4.39 (s, 2H), 3.00 (s, 3H);  $^{13}\text{C}$  NMR (100 MHz,  $\text{CDCl}_3$ )  $\delta$  159.2, 157.4, 156.9, 136.4, 133.6,

133.3, 129.7, 129.6, 128.6, 128.1, 127.4, 123.8, 122.8, 119.8, 117.7, 115.3, 114.9, 114.1, 86.8, 86.0, 80.2, 70.0, 67.0, 43.0, 38.3; IR (neat): 2927, 2239(s), 1604, 1508, 1485, 1363, 1232, 1167, 1037, 755; HRESIMS Calcd for  $[C_{31}H_{25}NNaO_4S]^+$  ( $M + Na^+$ ) 530.1397, found 530.1391.

***N*-((2-phenoxyphenyl)ethynyl)-*N*-(3-(4-phenoxyphenyl)prop-2-yn-1-yl)methanesulfonamide (**1u**)**

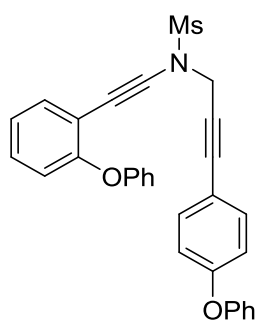

**1u**

The product **1u** was afforded as a pale yellow oil (97%, 480.7 mg).  $^1H$  NMR (400 MHz,  $CDCl_3$ )  $\delta$  7.48 (d,  $J = 7.6$  Hz, 1H), 7.39 – 7.28 (m, 4H), 7.27 – 7.17 (m, 3H), 7.15 – 7.08 (m, 1H), 7.08 – 7.02 (m, 1H), 6.99 (d,  $J = 8.0$  Hz, 3H), 6.91 (d,  $J = 8.0$  Hz, 3H), 6.86 (d,  $J = 8.4$  Hz, 2H), 4.38 (s, 2H), 2.98 (s, 3H);  $^{13}C$  NMR (100 MHz,  $CDCl_3$ )  $\delta$  157.9, 157.1, 156.7, 155.8, 133.4, 133.3, 129.7, 129.6, 129.4, 123.9, 123.6, 122.6, 119.5, 119.3, 117.9, 117.5, 115.9, 115.0, 86.2, 85.9, 80.8, 66.9, 42.6, 38.0; IR (neat): 3064, 3040, 2929, 2239(s), 1588, 1488, 1364, 1167, 869, 757; HRESIMS Calcd for  $[C_{30}H_{23}NNaO_4S]^+$  ( $M + Na^+$ ) 516.1240, found 516.1224.

***N*-((2-phenoxyphenyl)ethynyl)-*N*-(3-(*p*-tolyl)prop-2-yn-1-yl)methanesulfonamide (**1v**)**

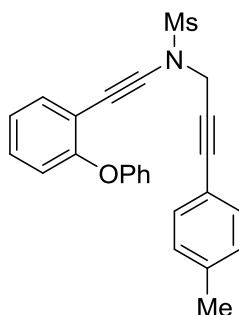

**1v**

The product **1v** was afforded as a pale yellow oil (99%, 413.3 mg). <sup>1</sup>H NMR (400 MHz, CDCl<sub>3</sub>) δ 7.50 (dd, *J* = 7.6, 1.2 Hz, 1H), 7.34 – 7.20 (m, 5H), 7.14 – 7.06 (m, 3H), 7.06 – 6.99 (m, 1H), 6.97 (d, *J* = 8.4 Hz, 1H), 6.92 (d, *J* = 7.6 Hz, 2H), 4.40 (s, 2H), 3.00 (s, 3H), 2.35 (s, 3H); <sup>13</sup>C NMR (100 MHz, CDCl<sub>3</sub>) δ 157.4, 156.9, 139.1, 133.6, 131.7, 129.7, 129.6, 129.1, 123.8, 122.7, 119.9, 118.7, 117.6, 115.3, 87.0, 86.0, 80.8, 67.0, 42.9, 38.3, 21.5; IR (neat): 3029, 2927, 2239(s), 1589, 1486, 11363, 1232, 1166, 757, 518; HRESIMS Calcd for [C<sub>25</sub>H<sub>21</sub>NNaO<sub>3</sub>S]<sup>+</sup> (M + Na<sup>+</sup>) 438.1134, found 438.1149.

***N*-(3-(4-(*tert*-butyl)phenyl)prop-2-yn-1-yl)-*N*-((2-phenoxyphenyl)ethynyl)-methanesulfonamide (1w)**

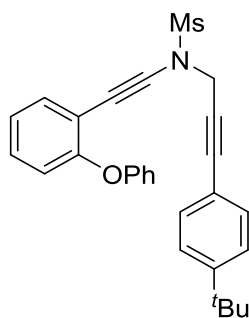**1w**

The product **1w** was afforded as a pale yellow oil (92%, 421.0 mg). <sup>1</sup>H NMR (400 MHz, CDCl<sub>3</sub>) δ 7.49 (dd, *J* = 7.6, 1.6 Hz, 1H), 7.38 – 7.28 (m, 4H), 7.28 – 7.18 (m, 3H), 7.12 – 7.04 (m, 1H), 7.04 – 6.97 (m, 1H), 6.95 (dd, *J* = 8.4, 0.8 Hz, 1H), 6.93 – 6.87 (m, 2H), 4.39 (s, 2H), 3.00 (s, 3H), 1.30 (s, 9H); <sup>13</sup>C NMR (100 MHz, CDCl<sub>3</sub>) δ 157.3, 156.8, 152.2, 133.5, 131.5, 129.6, 129.5, 125.3, 123.7, 122.7, 119.7, 118.6, 117.6, 115.2, 86.9, 86.0, 80.8, 66.9, 42.8, 38.2, 34.7, 31.0; IR (neat): 2963, 2869, 2240(s), 1590, 1486, 1366, 1232, 1168, 756, 564; HRESIMS Calcd for [C<sub>28</sub>H<sub>27</sub>NNaO<sub>3</sub>S]<sup>+</sup> (M + Na<sup>+</sup>) 480.1604, found 480.1589.

***N*-(3-(3,4-dimethoxyphenyl)prop-2-yn-1-yl)-*N*-((2-phenoxyphenyl)ethynyl)-methanesulfonamide (1x)**

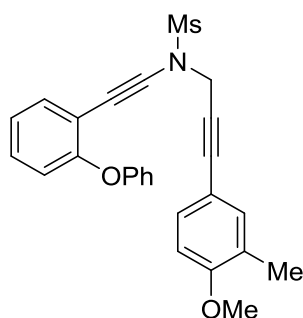

**1x**

The product **1x** was afforded as a pale yellow oil (95%, 432.7 mg).  $^1\text{H}$  NMR (400 MHz,  $\text{CDCl}_3$ )  $\delta$  7.49 (d,  $J = 7.6$  Hz, 1H), 7.29 – 7.20 (m, 4H), 7.19 – 7.14 (m, 1H), 7.12 – 7.04 (m, 1H), 7.04 – 6.97 (m, 1H), 6.95 (d,  $J = 8.4$  Hz, 1H), 6.91 (d,  $J = 8.4$  Hz, 2H), 6.70 (d,  $J = 8.4$  Hz, 1H), 4.38 (s, 2H), 3.79 (s, 3H), 2.99 (s, 3H), 2.16 (s, 3H);  $^{13}\text{C}$  NMR (100 MHz,  $\text{CDCl}_3$ )  $\delta$  158.2, 157.3, 156.7, 133.8, 133.5, 130.9, 129.6, 129.5, 126.7, 123.7, 122.6, 119.7, 117.5, 115.3, 113.1, 109.6, 87.1, 86.1, 79.7, 66.8, 55.2, 42.9, 38.2, 15.9; IR (neat): 2929, 2837, 2238(s), 1604, 1502, 1363, 1241, 1167, 756, 517; HRESIMS Calcd for  $[\text{C}_{26}\text{H}_{23}\text{NNaO}_4\text{S}]^+$  ( $\text{M} + \text{Na}^+$ ) 468.1240, found 468.1222.

***N*-(3-(3,4-dimethoxyphenyl)prop-2-yn-1-yl)-*N*-((2-phenoxyphenyl)ethynyl)-methanesulfonamide (**1y**)**

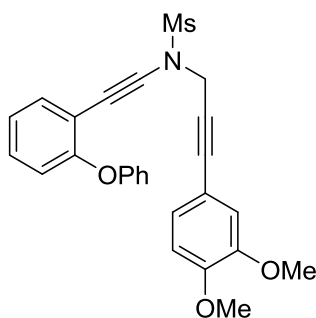

**1y**

The product **1y** was afforded as a pale yellow oil (96%, 443.0 mg).  $^1\text{H}$  NMR (400 MHz,  $\text{CDCl}_3$ )  $\delta$  7.50 (dd,  $J = 7.6, 1.6$  Hz, 1H), 7.32 – 7.19 (m, 3H), 7.14 – 7.05 (m, 1H), 7.05 – 6.98 (m, 2H), 6.96 (d,  $J = 8.4$  Hz, 1H), 6.94 – 6.87 (m, 3H), 6.76 (d,  $J = 8.4$  Hz, 1H), 4.40 (s, 2H), 3.86 (s, 3H), 3.81 (s, 3H), 2.99 (s, 3H);  $^{13}\text{C}$  NMR (100 MHz,  $\text{CDCl}_3$ )  $\delta$  157.2, 156.6, 149.8, 148.4, 133.4, 129.6, 129.4, 125.1, 123.7, 122.6, 119.7, 117.4, 115.2, 114.2, 113.6, 110.8, 86.9, 86.0, 79.9, 66.8, 55.6, 42.7, 38.1; IR (neat): 2927, 2239(s),

1604, 1508, 1485, 1363, 1232, 1167, 1037, 755; IR (neat): 2933, 2837, 2238(s), 1598, 1514, 1486, 1363, 1167, 1025, 760; HRESIMS Calcd for  $[C_{26}H_{23}NNaO_5S]^+$  ( $M + Na^+$ ) 484.1189, found 484.1197.

***N*-(3-(benzo[*d*][1,3]dioxol-5-yl)prop-2-yn-1-yl)-*N*-((2-phenoxyphenyl)ethynyl)-methanesulfonamide (**1z**)**

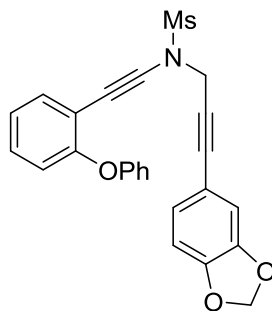

**1z**

The product **1z** was afforded as a pale yellow oil (92%, 409.9 mg).  $^1H$  NMR (400 MHz,  $CDCl_3$ )  $\delta$  7.49 (dd,  $J = 8.0, 1.6$  Hz, 1H), 7.31 – 7.21 (m, 3H), 7.13 – 7.05 (m, 1H), 7.05 – 6.98 (m, 1H), 6.95 (d,  $J = 8.4$  Hz, 1H), 6.93 – 6.86 (m, 3H), 6.81 (d,  $J = 1.6$  Hz, 1H), 6.70 (d,  $J = 8.0$  Hz, 1H), 5.94 (s, 2H), 4.38 (s, 2H), 2.99 (s, 3H);  $^{13}C$  NMR (100 MHz,  $CDCl_3$ )  $\delta$  157.3, 156.8, 148.3, 147.3, 133.5, 129.6, 129.5, 126.5, 123.7, 122.7, 119.7, 117.5, 115.2, 114.7, 111.5, 108.3, 101.3, 86.7, 85.9, 79.8, 66.9, 42.8, 38.1; IR (neat): 3014, 2902, 2239(s), 1589, 1487, 1360, 1038, 924, 757, 518; HRESIMS Calcd for  $[C_{25}H_{19}NNaO_5S]^+$  ( $M + Na^+$ ) 468.0876, found 468.0891.

***N*-(3-(naphthalen-2-yl)prop-2-yn-1-yl)-*N*-((2-phenoxyphenyl)ethynyl)-methanesulfonamide (**1aa**)**

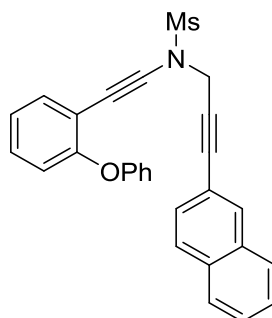

**1aa**



The product **1aa** was afforded as a pale yellow oil (89%, 401.8 mg).  $^1\text{H}$  NMR (400 MHz,  $\text{CDCl}_3$ )  $\delta$  7.96 – 7.89 (m, 1H), 7.85 – 7.79 (m, 1H), 7.75 (d,  $J = 8.4$  Hz, 2H), 7.57 – 7.46 (m, 3H), 7.42 (dd,  $J = 8.4, 1.2$  Hz, 1H), 7.32 – 7.25 (m, 1H), 7.23 – 7.17 (m, 2H), 7.14 – 7.07 (m, 1H), 7.02 – 6.95 (m, 2H), 6.95 – 6.88 (m, 2H), 4.47 (s, 2H), 3.04 (s, 3H);  $^{13}\text{C}$  NMR (100 MHz,  $\text{CDCl}_3$ )  $\delta$  157.4, 157.0, 133.7, 133.0, 132.8, 132.0, 129.8, 129.6, 128.2, 128.1, 127.8, 127.7, 127.0, 126.7, 123.8, 122.8, 119.8, 119.0, 117.6, 115.3, 87.2, 86.0, 81.8, 67.1, 43.0, 38.4; IR (neat): 3062, 3014, 2901, 2239(s), 1589, 1445, 1360, 1167, 757, 518; HRESIMS Calcd for  $[\text{C}_{28}\text{H}_{21}\text{NNaO}_3\text{S}]^+$  ( $\text{M} + \text{Na}^+$ ) 474.1134, found 474.1123.

***N*-((2-phenoxyphenyl)ethynyl)-*N*-(3-(thiophen-3-yl)prop-2-yn-1-yl)-methanesulfonamide (**1ab**)**

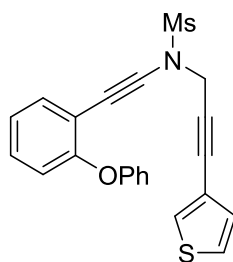

**1ab**

The product **1ab** was afforded as a pale yellow oil (99%, 403.4 mg).  $^1\text{H}$  NMR (400 MHz,  $\text{CDCl}_3$ )  $\delta$  7.48 (dd,  $J = 7.6, 1.6$  Hz, 1H), 7.41 – 7.35 (m, 1H), 7.31 – 7.18 (m, 4H), 7.11 – 7.05 (m, 1H), 7.05 – 6.97 (m, 2H), 6.97 – 6.93 (m, 1H), 6.90 (d,  $J = 7.6$  Hz, 2H), 4.37 (s, 2H), 2.97 (s, 3H);  $^{13}\text{C}$  NMR (100 MHz,  $\text{CDCl}_3$ )  $\delta$  157.2, 156.6, 133.4, 129.8, 129.6(3), 129.5(7), 129.5, 125.5, 123.7, 122.6, 120.6, 119.7, 117.4, 115.1, 85.9, 81.9, 81.1, 66.9, 42.7, 38.1; IR (neat): 3109, 3021, 2929, 2240(s), 1589, 1486, 1362, 1166, 757, 515; HRESIMS Calcd for  $[\text{C}_{22}\text{H}_{17}\text{NNaO}_3\text{S}_2]^+$  ( $\text{M} + \text{Na}^+$ ) 430.0542, found 430.0527.

**2. *N*-propargyl ynamides **1ac-1af** were prepared according to the following procedures.<sup>2-5</sup>**

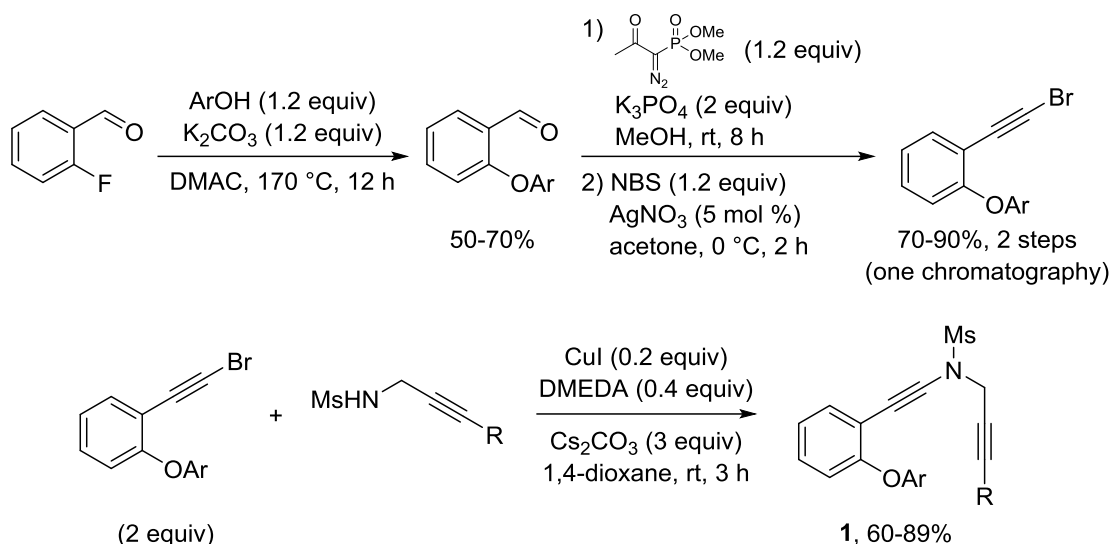

To a solution of 2-fluorobenzaldehyde (5.0 mmol, 621 mg) in DMAC (7.5 mL) was added  $K_2CO_3$  (6 mmol, 830 mg) and ArOH (6.0 mmol) at rt, the mixture solution was stirred at 170 °C for 12 h. The mixture was filtered, extracted by EtOAc and concentrated. The residue was purified by flash chromatography on silica gel (eluent: hexanes/EtOAc) to afford the desired product (50-70%).<sup>5</sup>

To a solution of above product (2.7 mmol) in MeOH (15 mL) was added  $K_3PO_4$  (5.4 mmol, 1.15 g) and dimethyl(1-diazo-2-oxopropyl)phosphonate (3.2 mmol, 622 mg) in sequence. The mixture solution was stirred at 25 °C for 3-8 h. The mixture was filtered, extracted by EtOAc and concentrated.<sup>2</sup> Then, NBS (3.2 mmol, 577 mg) and  $AgNO_3$  (0.14 mmol, 23 mg) were added to a solution of the above crude product in acetone (15 mL) at 0 °C for about 1 h and the progress of the reaction was monitored by TLC. The solution was then concentrated under a reduced pressure, filtered and washed with hexanes, concentrated again under a reduced pressure to give the product without further purification (70-90%, 2 steps).<sup>3</sup>

To a dry flask was added CuI (0.2 mmol, 38 mg), DMEDA (0.4 mmol, 35 mg),  $Cs_2CO_3$  (3 mmol, 977 mg), protected propargylamide derivative (1.0 mmol) and 1,4-dioxane (8 mL). To the mixture solution of the above product (2.0 mmol) was added. The reaction was stirred at rt for 2-6 h until the reaction was complete monitored by TLC. Next, the mixture solution was filtered and concentrated to afford the crude solid. The residue

was purified by chromatography on silica gel (eluent: hexanes/EtOAc) to afford the desired product **1** (60-89%).<sup>4</sup>

***N*-(3-(4-methoxyphenyl)prop-2-yn-1-yl)-*N*-((2-(*p*-tolylloxy)phenyl)ethynyl)-methanesulfonamide (**1ac**)**

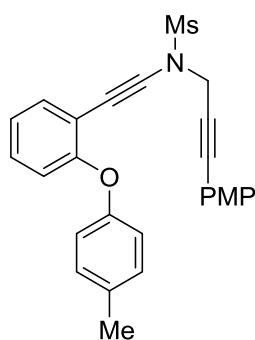

**1ac**

The product **1ac** was afforded as a pale yellow oil (89%, 396.5 mg). <sup>1</sup>H NMR (400 MHz, CDCl<sub>3</sub>) δ 7.48 (dd, *J* = 7.6, 1.6 Hz, 1H), 7.31 (d, *J* = 8.8 Hz, 2H), 7.27 – 7.19 (m, 1H), 7.09 – 7.00 (m, 3H), 6.89 (dd, *J* = 8.4, 0.8 Hz, 1H), 6.84 (d, *J* = 8.4 Hz, 2H), 6.78 (d, *J* = 8.8 Hz, 2H), 4.43 (s, 2H), 3.78 (s, 3H), 3.06 (s, 3H), 2.27 (s, 3H); <sup>13</sup>C NMR (100 MHz, CDCl<sub>3</sub>) δ 160.0, 157.6, 154.9, 133.5, 133.2, 132.4, 130.0, 129.6, 123.2, 118.9, 118.0, 114.7, 113.9, 113.7, 86.8, 85.8, 80.1, 67.1, 55.2, 42.9, 38.2, 20.5; IR (neat): 2957, 2930, 2839, 2240(s), 1606, 1505, 1360, 1166, 1034, 775; HRESIMS Calcd for [C<sub>26</sub>H<sub>23</sub>NNaO<sub>4</sub>S]<sup>+</sup> (M + Na<sup>+</sup>) 468.1240, found 468.1253.

***N*-((2-(4-methoxyphenoxy)phenyl)ethynyl)-*N*-(3-(4-methoxyphenyl)prop-2-yn-1-yl)methanesulfonamide (**1ad**)**

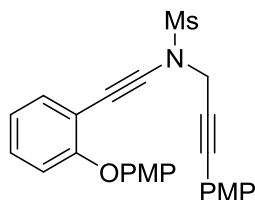

**1ad**

The product **1ad** was afforded as a pale yellow oil (60%, 276.9 mg). <sup>1</sup>H NMR (400 MHz, CDCl<sub>3</sub>) δ 7.47 (dd, *J* = 7.6, 1.6 Hz, 1H), 7.31 (d, *J* = 8.8 Hz, 2H), 7.24 – 7.17 (m,

1H), 7.06 – 6.97 (m, 1H), 6.91 (d,  $J = 8.8$  Hz, 2H), 6.86 – 6.71 (m, 5H), 4.48 (s, 2H), 3.78 (s, 3H), 3.74 (s, 3H), 3.13 (s, 3H);  $^{13}\text{C}$  NMR (100 MHz,  $\text{CDCl}_3$ )  $\delta$  159.9, 158.4, 155.6, 150.4, 133.5, 133.2, 129.5, 122.8, 119.8, 117.8, 114.7, 114.0, 113.9, 113.7, 86.9, 85.7, 80.1, 67.2, 55.5, 55.2, 43.0, 38.2; IR (neat): 2933, 2837, 2239(s), 1606, 1508, 1363, 1227, 1167, 1034, 834; HRESIMS Calcd for  $[\text{C}_{26}\text{H}_{23}\text{NNaO}_5\text{S}]^+$  ( $\text{M} + \text{Na}^+$ ) 484.1189, found 484.1174.

***N*-((4-chloro-2-phenoxyphenyl)ethynyl)-*N*-(3-(4-methoxyphenyl)prop-2-yn-1-yl)methanesulfonamide (1ae)**

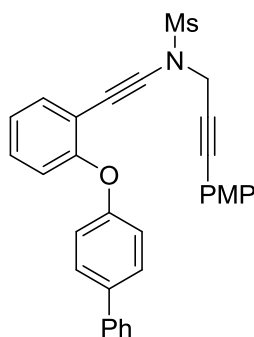

**1ae**

The product **1ae** was afforded as a pale yellow oil (76%, 385.8 mg).  $^1\text{H}$  NMR (400 MHz,  $\text{CDCl}_3$ )  $\delta$  7.51 (dd,  $J = 7.6, 1.2$  Hz, 1H), 7.48 (d,  $J = 7.6$  Hz, 2H), 7.46 (d,  $J = 8.8$  Hz, 2H), 7.42 – 7.34 (m, 2H), 7.34 – 7.24 (m, 4H), 7.15 – 7.07 (m, 1H), 7.02 (d,  $J = 8.0$  Hz, 1H), 6.98 (d,  $J = 8.4$  Hz, 2H), 6.74 (d,  $J = 8.8$  Hz, 2H), 4.40 (s, 2H), 3.70 (s, 3H), 2.98 (s, 3H);  $^{13}\text{C}$  NMR (100 MHz,  $\text{CDCl}_3$ )  $\delta$  160.0, 157.0, 156.7, 140.2, 135.6, 133.6, 133.2, 129.7, 128.7, 128.2, 126.9, 126.6, 123.9, 120.0, 117.8, 115.4, 113.9, 113.6, 86.8, 86.2, 80.1, 66.9, 55.1, 42.9, 38.2; IR (neat): 3032, 2931, 2838, 2240(s), 1606, 1509, 1363, 1249, 1167, 764; HRESIMS Calcd for  $[\text{C}_{31}\text{H}_{25}\text{NNaO}_4\text{S}]^+$  ( $\text{M} + \text{Na}^+$ ) 530.1397, found 530.1410.

***N*-((2-(4-chlorophenoxy)phenyl)ethynyl)-*N*-(3-(4-methoxyphenyl)prop-2-yn-1-yl)methanesulfonamide (1af)**

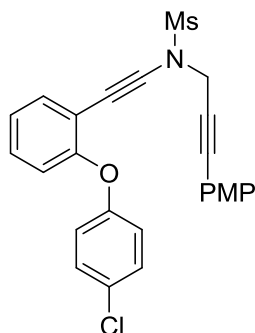

**1af**

The product **1af** was afforded as a pale yellow oil (81%, 377.4 mg).  $^1\text{H}$  NMR (400 MHz,  $\text{CDCl}_3$ )  $\delta$  7.49 (d,  $J = 6.8$  Hz, 1H), 7.37 – 7.24 (m, 3H), 7.17 (d,  $J = 8.8$  Hz, 2H), 7.13 – 7.05 (m, 1H), 6.94 (d,  $J = 8.4$  Hz, 1H), 6.83 (d,  $J = 8.8$  Hz, 2H), 6.81 (d,  $J = 8.8$  Hz, 2H), 4.42 (s, 2H), 3.78 (s, 3H), 3.04 (s, 3H);  $^{13}\text{C}$  NMR (100 MHz,  $\text{CDCl}_3$ )  $\delta$  160.0, 156.2, 156.0, 133.5, 133.1, 129.7, 129.4, 127.5, 124.1, 119.8, 118.7, 115.3, 113.9, 113.5, 86.8, 86.2, 79.9, 66.7, 55.1, 42.8, 38.2; IR (neat): 2932, 2839, 2240(s), 1606, 1486, 1360, 1166, 1034, 964, 761; HRESIMS Calcd for  $[\text{C}_{25}\text{H}_{19}\text{ClINNaO}_4\text{S}]^+$  ( $\text{M} + \text{Na}^+$ ) 488.0694, found 487.0688.

***N*-((2-(4-methoxyphenoxy)phenyl)ethynyl)-*N*-(3-phenylprop-2-yn-1-yl)methanesulfonamide (**1ag**)**

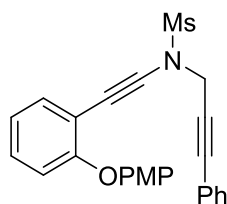

**1ag**

The product **1ag** was afforded as a pale yellow oil (80%, 345.2 mg).  $^1\text{H}$  NMR (400 MHz, Acetone- $d_6$ )  $\delta$  7.56 (dd,  $J = 8.0, 1.6$  Hz, 1H), 7.52 – 7.46 (m, 2H), 7.45 – 7.31 (m, 4H), 7.17 – 7.10 (m, 1H), 7.03 – 6.94 (m, 4H), 6.91 (dd,  $J = 8.0, 1.2$  Hz, 1H), 4.64 (s, 2H), 3.80 (s, 3H), 3.31 (s, 3H);  $^{13}\text{C}$  NMR (100 MHz, Acetone- $d_6$ )  $\delta$  159.2, 156.8, 151.1, 134.3, 132.5, 130.6, 129.8, 129.3, 123.8, 122.6, 120.6, 118.7, 115.7, 115.0, 87.1, 87.0, 82.9, 67.7, 55.9, 43.3, 38.6; IR (neat): 3009, 2932, 2836, 2239(s), 1505, 1444, 1166,

1035, 757, 517; HRESIMS Calcd for  $[C_{25}H_{21}NNaO_4S]^+$  ( $M + Na^+$ ) 454.1083, found 454.1077.

***N*-(3-(2-methoxyphenyl)prop-2-yn-1-yl)-*N*-((2-phenoxyphenyl)ethynyl)methanesulfonamide (1ah)**

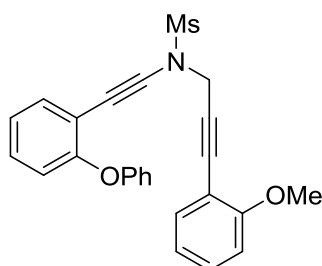

**1ah**

The product **1ah** was afforded as a pale yellow oil (88%, 379.7 mg).  $^1H$  NMR (400 MHz,  $CDCl_3$ )  $\delta$  7.49 (d,  $J = 7.6$  Hz, 1H), 7.37 – 7.17 (m, 5H), 7.08 (t,  $J = 7.6$  Hz, 1H), 7.03 – 6.93 (m, 2H), 6.90 (d,  $J = 8.0$  Hz, 2H), 6.88 – 6.81 (m, 2H), 4.43 (s, 2H), 3.77 (s, 3H), 3.09 (s, 3H);  $^{13}C$  NMR (100 MHz,  $CDCl_3$ )  $\delta$  160.2, 157.4, 156.8, 133.5(4), 133.4(8), 130.3, 129.6, 129.5, 123.7, 122.6, 120.4, 119.8, 117.6, 115.4, 111.0, 110.6, 86.2, 85.3, 83.4, 66.8, 55.4, 43.2, 38.1; IR (neat): 3016, 2931, 2838, 2239(s), 1595, 1447, 1163, 1024, 692, 518; HRESIMS Calcd for  $[C_{25}H_{21}NNaO_4S]^+$  ( $M + Na^+$ ) 454.1083, found 454.1074.

***N*-(but-2-yn-1-yl)-*N*-((2-phenoxyphenyl)ethynyl)methanesulfonamide (1ai)**

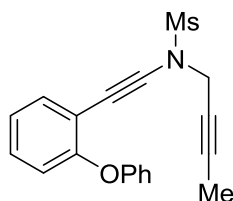

**1ai**

The product **1ai** was afforded as a pale yellow oil (94%, 319.0 mg).  $^1H$  NMR (400 MHz,  $CDCl_3$ )  $\delta$  7.49 (dd,  $J = 7.6, 1.6$  Hz, 1H), 7.34 – 7.23 (m, 3H), 7.14 – 7.07 (m, 1H), 7.04 (t,  $J = 7.6$  Hz, 1H), 7.00 – 6.87 (m, 3H), 4.14 (q,  $J = 2.4$  Hz, 2H), 2.96 (s, 3H), 1.78 (t,  $J = 2.4$  Hz, 3H);  $^{13}C$  NMR (100 MHz,  $CDCl_3$ )  $\delta$  157.4, 156.6, 133.4, 129.6, 129.5, 123.8, 122.6, 119.9, 117.4, 115.4, 86.1, 83.1, 71.6, 66.7, 42.4, 38.2, 3.4; IR (neat): 3022,

2926, 2239(s), 1959, 1595, 1486, 1166, 1032, 754, 518; HRESIMS Calcd for  $[C_{19}H_{17}NNaO_3S]^+$  ( $M + Na^+$ ) 362.0821, found 362.0814.

### General procedure for the synthesis of racemic chromeno[3,4-*c*]pyrroles **2**:

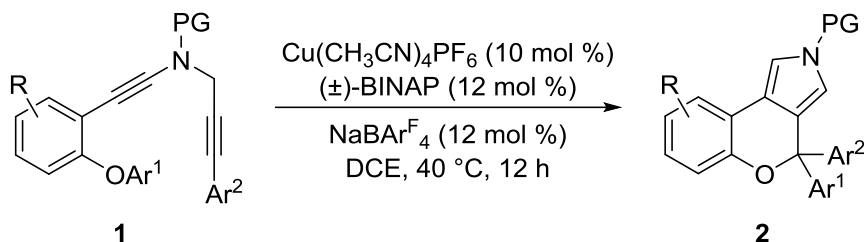

The powdered Cu(CH<sub>3</sub>CN)<sub>4</sub>PF<sub>6</sub> (0.01 mmol, 3.7 mg), (±)-BINAP (0.012 mmol, 7.5 mg) and NaBAr<sup>F</sup><sub>4</sub> (0.012 mmol, 10.6 mg) were introduced into a vials. After DCE (2 mL) was injected into the vials, the solution was stirred at 40 °C for 2 h. Then the *N*-propargyl ynamide **1** (0.1 mmol) was introduced into the system subsequently. The resulting mixture was stirred at 40 °C and the progress of the reaction was monitored by TLC. After concentration in vacuo, the residue was purified by flash chromatography on silica gel (eluent: hexanes/ethyl acetate) to give the desired chromeno[3,4-*c*]pyrrole **2**.

### 4-(4-Methoxyphenyl)-2-(methylsulfonyl)-4-phenyl-2,4-dihydrochromeno[3,4-*c*]pyrrole (**2a**)

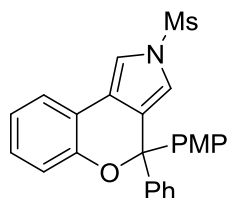

**2a**

Compound **2a** was prepared in 99% yield (42.7 mg) according to the general procedure. Pale yellow solid (mp 99-100 °C). <sup>1</sup>H NMR (400 MHz, CDCl<sub>3</sub>) δ 7.40 – 7.25 (m, 7H), 7.19 (d, *J* = 8.8 Hz, 2H), 7.14 – 7.08 (m, 1H), 7.03 (dd, *J* = 8.0, 0.8 Hz, 1H), 6.94 – 6.86 (m, 1H), 6.79 (d, *J* = 8.8 Hz, 2H), 6.70 (d, *J* = 2.0 Hz, 1H), 3.75 (s, 3H), 3.14 (s, 3H);

$^{13}\text{C}$  NMR (100 MHz,  $\text{CDCl}_3$ )  $\delta$  159.1, 152.4, 143.4 135.3, 129.0, 128.8, 128.6, 128.0, 127.7, 127.5, 123.4, 122.0, 121.3, 118.9, 118.7, 117.6, 113.3(1), 113.2(7), 82.9, 55.2, 42.8; IR (neat): 3132, 3024, 2928, 1509, 1366, 1173, 1068, 769, 577; HRESIMS Calcd for  $[\text{C}_{25}\text{H}_{21}\text{NNaO}_4\text{S}]^+$  ( $\text{M} + \text{Na}^+$ ) 454.1083, found 454.1088.

***N*-(dibenzo[*b,f*]oxepin-10-yl)-*N*-(3-(4-methoxyphenyl)prop-2-yn-1-yl)methanesulfonamide (**2a'**)**

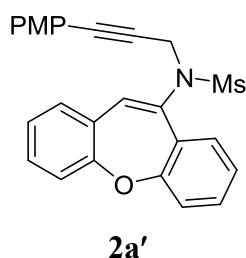

Compound **2a'** was prepared in 15% yield (6.5 mg) according to the general procedure. Pale yellow oil.  $^1\text{H}$  NMR (400 MHz,  $\text{CDCl}_3$ )  $\delta$  7.58 (dd,  $J = 7.6, 1.6$  Hz, 1H), 7.42 – 7.30 (m, 4H), 7.25 – 7.17 (m, 5H), 7.17 – 7.10 (m, 1H), 6.84 (d,  $J = 8.8$  Hz, 2H), 4.62 (s, 2H), 3.80 (s, 3H), 3.29 (s, 3H);  $^{13}\text{C}$  NMR (100 MHz,  $\text{CDCl}_3$ )  $\delta$  160.0, 158.0, 157.7, 138.1, 133.2, 131.4, 130.8, 129.8, 129.4, 129.3, 128.1, 127.8, 125.2, 125.0, 121.7, 121.2, 114.1(0), 114.0(6), 86.1, 82.2, 55.3, 41.5, 40.4; IR (neat): 2924, 2852, 1605, 1509, 1446, 1345, 1248, 1153, 1031, 787; HRESIMS Calcd for  $[\text{C}_{25}\text{H}_{21}\text{NNaO}_4\text{S}]^+$  ( $\text{M} + \text{Na}^+$ ) 454.1083, found 454.1074.

**4-(4-Methoxyphenyl)-4-phenyl-2-(propylsulfonyl)-2,4-dihydrochromeno[3,4-*c*]pyrrole (**2b**)**

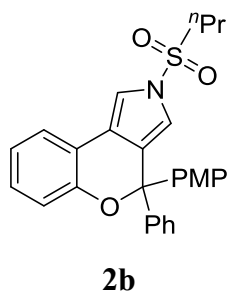

Compound **2b** was prepared in 85% yield (39.1 mg) according to the general procedure. Pale yellow solid (mp 77-78 °C).  $^1\text{H}$  NMR (400 MHz,  $\text{CDCl}_3$ )  $\delta$  7.39 – 7.24 (m, 7H),



7.19 (d,  $J = 8.8$  Hz, 2H), 7.15 – 7.07 (m, 1H), 7.03 (d,  $J = 8.0$  Hz, 1H), 6.95 – 6.86 (m, 1H), 6.79 (d,  $J = 8.8$  Hz, 2H), 6.67 (d,  $J = 2.0$  Hz, 1H), 3.76 (s, 3H), 3.21 (t,  $J = 7.6$  Hz, 2H), 1.79 – 1.66 (m, 2H), 1.00 (t,  $J = 7.6$  Hz, 3H);  $^{13}\text{C}$  NMR (100 MHz,  $\text{CDCl}_3$ )  $\delta$  159.1, 152.4, 143.4, 135.4, 129.0, 128.7, 128.2, 127.9, 127.7, 127.6, 123.4, 122.0, 121.0, 118.9, 118.8, 118.0, 113.6, 113.3, 83.0, 57.3, 55.2, 17.2, 12.6; IR (neat): 3133, 2963, 2927, 1608, 1510, 1469, 1163, 1063, 753, 700; HRESIMS Calcd for  $[\text{C}_{27}\text{H}_{25}\text{NNaO}_4\text{S}]^+$  ( $\text{M} + \text{Na}^+$ ) 482.1397, found 482.1388.

**2-(Isopropylsulfonyl)-4-(4-methoxyphenyl)-4-phenyl-2,4-dihydrochromeno[3,4-c]pyrrole (2c)**

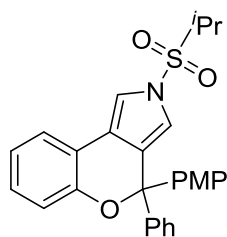

**2c**

Compound **2c** was prepared in 82% yield (37.7 mg) according to the general procedure. Pale yellow solid (mp 66-67 °C).  $^1\text{H}$  NMR (400 MHz,  $\text{CDCl}_3$ )  $\delta$  7.37 (dd,  $J = 7.6, 1.2$  Hz, 1H), 7.33 (d,  $J = 2.0$  Hz, 1H), 7.33 – 7.24 (m, 5H), 7.19 (d,  $J = 8.8$  Hz, 2H), 7.14 – 7.08 (m, 1H), 7.06 – 7.01 (m, 1H), 6.94 – 6.87 (m, 1H), 6.79 (d,  $J = 8.8$  Hz, 2H), 6.65 (d,  $J = 2.0$  Hz, 1H), 3.76 (s, 3H), 3.48 – 3.34 (m, 1H), 1.32 (d,  $J = 6.8$  Hz, 6H);  $^{13}\text{C}$  NMR (100 MHz,  $\text{CDCl}_3$ )  $\delta$  159.1, 152.4, 143.4, 135.4, 129.1, 128.7, 127.9(2), 127.9(1), 127.7, 127.6, 123.4, 122.0, 120.6, 118.8, 118.7, 114.2, 113.2, 83.0, 56.9, 55.2, 16.4; IR (neat): 3133, 2960, 2927, 1609, 1510, 1358, 1255, 1070, 708, 612; HRESIMS Calcd for  $[\text{C}_{27}\text{H}_{25}\text{NNaO}_4\text{S}]^+$  ( $\text{M} + \text{Na}^+$ ) 482.1397, found 482.1389.

**2-((4-Bromophenyl)sulfonyl)-4-(4-methoxyphenyl)-4-phenyl-2,4-dihydrochromeno[3,4-c]pyrrole (2d)**

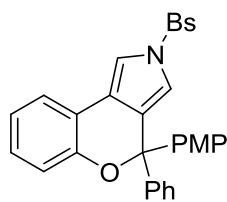

**2d**

Compound **2d** was prepared in 84% yield (48.1 mg) according to the general procedure. Pale yellow solid (mp 70-71 °C). <sup>1</sup>H NMR (400 MHz, CDCl<sub>3</sub>) δ 7.69 (d, *J* = 8.8 Hz, 2H), 7.64 (d, *J* = 8.8 Hz, 2H), 7.36 (d, *J* = 2.0 Hz, 1H), 7.33 (dd, *J* = 7.6, 1.2 Hz, 1H), 7.29 – 7.19 (m, 5H), 7.08 (d, *J* = 8.8 Hz, 3H), 6.99 (d, *J* = 7.6 Hz, 1H), 6.91 – 6.84 (m, 1H), 6.76 (d, *J* = 8.8 Hz, 2H), 6.69 (d, *J* = 2.0 Hz, 1H), 3.76 (s, 3H); <sup>13</sup>C NMR (100 MHz, CDCl<sub>3</sub>) δ 159.1, 152.5, 143.1, 137.6, 135.1, 132.8, 129.4, 129.3, 129.0, 128.9, 128.2, 127.9, 127.8, 127.6, 123.5, 122.1, 122.0, 118.8, 118.4, 118.2, 113.6, 113.2, 82.9, 55.2; IR (neat): 2961, 2925, 1574, 1509, 1470, 1376, 1176, 1065, 745, 591; HRESIMS Calcd for [C<sub>30</sub>H<sub>22</sub>BrNNaO<sub>4</sub>S]<sup>+</sup> (M + Na<sup>+</sup>) 594.0345, found 594.0329.

**4-(4-Methoxyphenyl)-2-((4-nitrophenyl)sulfonyl)-4-phenyl-2,4-dihydrochromeno[3,4-c]pyrrole (2e)**

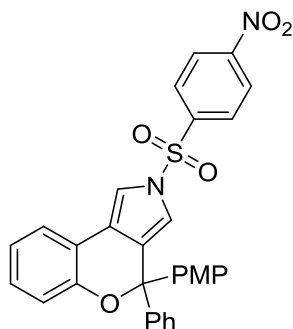

**2e**

Compound **2e** was prepared in 93% yield (50.1 mg) according to the general procedure. Pale yellow solid (mp 92-93 °C). <sup>1</sup>H NMR (400 MHz, CDCl<sub>3</sub>) δ 8.29 (d, *J* = 8.8 Hz, 2H), 7.98 (d, *J* = 8.8 Hz, 2H), 7.38 (d, *J* = 1.2 Hz, 1H), 7.32 (d, *J* = 7.2 Hz, 1H), 7.28 – 7.19 (m, 5H), 7.14 – 7.03 (m, 3H), 7.03 – 6.95 (m, 1H), 6.90 – 6.81 (m, 1H), 6.80 – 6.66 (m, 3H), 3.73 (s, 3H); <sup>13</sup>C NMR (100 MHz, CDCl<sub>3</sub>) δ 159.1, 152.4, 150.6, 143.8, 142.9, 134.8, 130.1, 129.2, 128.9, 128.1, 127.9, 127.8, 127.5, 124.6, 123.5, 122.6, 122.0,

118.9, 118.1, 113.5, 113.2, 82.9, 55.1; IR (neat): 2960, 2926, 1609, 1533, 1181, 1067, 741, 633; HRESIMS Calcd for  $[C_{30}H_{22}N_2NaO_6S]^+$  ( $M + Na^+$ ) 561.1091, found 561.1076.

**4-(4-Methoxyphenyl)-4-phenyl-2-((4-(trifluoromethyl)phenyl)sulfonyl)-2,4-dihydrochromeno[3,4-c]pyrrole (2f)**

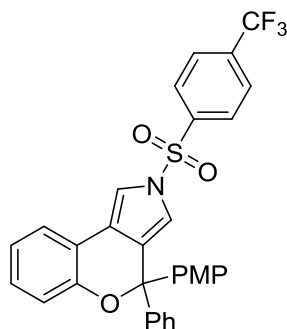

**2f**

Compound **2f** was prepared in 95% yield (53.8 mg) according to the general procedure. Pale yellow oil.  $^1H$  NMR (400 MHz,  $CDCl_3$ )  $\delta$  7.95 (d,  $J = 8.4$  Hz, 2H), 7.76 (d,  $J = 8.4$  Hz, 2H), 7.39 (d,  $J = 2.0$  Hz, 1H), 7.33 (d,  $J = 7.6$  Hz, 1H), 7.27 – 7.19 (m, 5H), 7.08 (d,  $J = 8.8$  Hz, 3H), 7.00 (d,  $J = 8.0$  Hz, 1H), 6.91 – 6.83 (m, 1H), 6.74 (d,  $J = 8.8$  Hz, 3H), 3.74 (s, 3H);  $^{13}C$  NMR (100 MHz,  $CDCl_3$ )  $\delta$  159.1, 152.5, 143.0, 142.0, 135.6 (q,  $J = 33.0$  Hz), 134.9, 129.8, 129.1, 129.0, 127.9, 127.8, 127.5, 127.3, 126.6 (q,  $J = 4.0$  Hz), 123.5, 122.9 (q,  $J = 272.0$  Hz), 122.4, 122.0, 118.9, 118.3, 118.2, 113.6, 113.2, 82.9, 55.1;  $^{19}F$  NMR (376 MHz,  $CDCl_3$ )  $\delta$  -63.3; IR (neat): 2959, 2926, 1609, 1509, 1381, 1323, 1179, 1063, 717, 633; HRESIMS Calcd for  $[C_{31}H_{22}F_3NNaO_4S]^+$  ( $M + Na^+$ ) 584.1114, found 584.1101.

**4-(4-Methoxyphenyl)-4-phenyl-2-tosyl-2,4-dihydrochromeno[3,4-c]pyrrole (2g)**

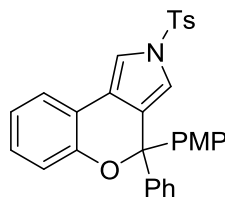

**2g**

Compound **2g** was prepared in 73% yield (37.0 mg) according to the general procedure. Pale yellow solid (mp 154-155 °C). <sup>1</sup>H NMR (400 MHz, CDCl<sub>3</sub>) δ 7.72 (d, *J* = 8.4 Hz, 2H), 7.36 (d, *J* = 2.0 Hz, 1H), 7.32 (dd, *J* = 7.6, 1.2 Hz, 1H), 7.29 (d, *J* = 8.4 Hz, 2H), 7.27 – 7.20 (m, 5H), 7.10 (d, *J* = 8.8 Hz, 2H), 7.08 – 7.04 (m, 1H), 6.99 (d, *J* = 7.6 Hz, 1H), 6.90 – 6.82 (m, 1H), 6.75 (d, *J* = 8.8 Hz, 2H), 6.73 (d, *J* = 2.0 Hz, 1H), 3.75 (s, 3H), 2.41 (s, 3H); <sup>13</sup>C NMR (100 MHz, CDCl<sub>3</sub>) δ 159.0, 152.4, 145.2, 143.2, 135.8, 135.3, 130.0, 129.1, 128.7, 127.9, 127.7, 127.6, 126.8, 123.4, 121.9, 121.5, 118.8, 118.7, 118.2, 113.6, 113.2, 83.0, 55.2, 21.6; IR (neat): 2958, 2925, 2853, 1610, 1509, 1374, 1174, 1066, 753, 671; HRESIMS Calcd for [C<sub>31</sub>H<sub>25</sub>NNaO<sub>4</sub>S]<sup>+</sup> (M + Na<sup>+</sup>) 530.1397, found 530.1386.

**4-(4-Methoxyphenyl)-2-((4-methoxyphenyl)sulfonyl)-4-phenyl-2,4-dihydrochromeno[3,4-c]pyrrole (2h)**

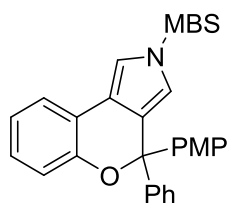

Compound **2h** was prepared in 53% yield (26.2 mg) according to the general procedure. Pale yellow oil. <sup>1</sup>H NMR (400 MHz, CDCl<sub>3</sub>) δ 7.78 (d, *J* = 8.8 Hz, 2H), 7.36 (d, *J* = 2.0 Hz, 1H), 7.33 (dd, *J* = 7.6, 1.2 Hz, 1H), 7.25 – 7.20 (m, 5H), 7.10 (d, *J* = 8.8 Hz, 2H), 7.07 (dd, *J* = 7.6, 2.0 Hz, 1H), 6.99 (dd, *J* = 8.8, 1.2 Hz, 1H), 6.96 (d, *J* = 8.8 Hz, 2H), 6.90 – 6.84 (m, 1H), 6.75 (d, *J* = 8.8 Hz, 2H), 6.72 (d, *J* = 2.0 Hz, 1H), 3.86 (s, 3H), 3.76 (s, 3H); <sup>13</sup>C NMR (100 MHz, CDCl<sub>3</sub>) δ 163.9, 159.1, 152.4, 143.3, 135.3, 130.1, 129.2, 129.1, 128.6(4), 128.5(8), 127.9, 127.7, 127.6, 123.4, 121.9, 121.4, 118.8(0), 118.7(6), 118.1, 114.6, 113.6, 113.2, 83.0, 55.7, 55.2; IR (neat): 2960, 2928, 2840, 1594, 1469, 1166, 1065, 1034, 754, 603; HRESIMS Calcd for [C<sub>31</sub>H<sub>25</sub>NNaO<sub>5</sub>S]<sup>+</sup> (M + Na<sup>+</sup>) 546.1346, found 546.1346.

**4-(4-Methoxyphenyl)-7-methyl-2-(methylsulfonyl)-4-phenyl-2,4-**

### dihydrochromeno[3,4-*c*]pyrrole (**2i**)

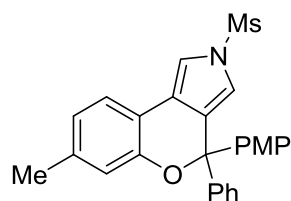

**2i**

Compound **2i** was prepared in 91% yield (40.5 mg) according to the general procedure. Pale yellow oil.  $^1\text{H}$  NMR (400 MHz,  $\text{CDCl}_3$ )  $\delta$  7.36 – 7.21 (m, 7H), 7.18 (d,  $J = 8.8$  Hz, 2H), 6.89 – 6.83 (m, 1H), 6.78 (d,  $J = 8.8$  Hz, 2H), 6.71 (d,  $J = 7.6$  Hz, 1H), 6.67 (d,  $J = 2.0$  Hz, 1H), 3.74 (s, 3H), 3.11 (s, 3H), 2.25 (s, 3H);  $^{13}\text{C}$  NMR (100 MHz,  $\text{CDCl}_3$ )  $\delta$  159.0, 152.3, 143.5, 139.1, 135.5, 128.9, 128.4, 127.9, 127.6, 127.5, 123.1, 122.9, 121.4, 119.2, 117.6, 115.7, 113.2, 112.8, 82.8, 55.1, 42.7, 21.4; IR (neat): 2958, 2927, 1735, 1610, 1509, 1252, 1171, 1067, 765, 561; HRESIMS Calcd for  $[\text{C}_{26}\text{H}_{23}\text{NNaO}_4\text{S}]^+$  ( $\text{M} + \text{Na}^+$ ) 468.1240, found 468.1226.

### 7-Methoxy-4-(4-methoxyphenyl)-2-(methylsulfonyl)-4-phenyl-2,4-dihydrochromeno[3,4-*c*]pyrrole (**2j**)

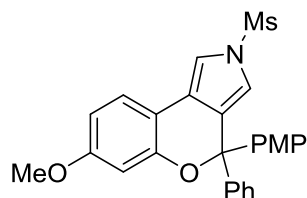

**2j**

Compound **2j** was prepared in 90% yield (42.4 mg) according to the general procedure. Pale yellow oil.  $^1\text{H}$  NMR (400 MHz,  $\text{CDCl}_3$ )  $\delta$  7.34 – 7.23 (m, 7H), 7.18 (d,  $J = 8.8$  Hz, 2H), 6.79 (d,  $J = 8.8$  Hz, 2H), 6.67 (d,  $J = 2.0$  Hz, 1H), 6.60 (d,  $J = 2.0$  Hz, 1H), 6.49 (dd,  $J = 8.4, 2.4$  Hz, 1H), 3.76 (s, 3H), 3.74 (s, 3H), 3.13 (s, 3H);  $^{13}\text{C}$  NMR (100 MHz,  $\text{CDCl}_3$ )  $\delta$  160.3, 159.1, 153.6, 143.4, 135.3, 129.0, 128.1, 128.0, 127.7, 127.5, 124.1, 121.4, 117.6, 113.3, 112.1, 111.5, 108.6, 104.1, 83.2, 55.3, 55.2, 42.7; IR (neat): 2958, 2927, 2853, 1614, 1510, 1254, 1170, 1068, 765; HRESIMS Calcd for  $[\text{C}_{26}\text{H}_{23}\text{NNaO}_5\text{S}]^+$  ( $\text{M} + \text{Na}^+$ ) 484.1189, found 484.1175.

**7-Fluoro-4-(4-methoxyphenyl)-2-(methylsulfonyl)-4-phenyl-2,4-dihydrochromeno[3,4-*c*]pyrrole (2k)**

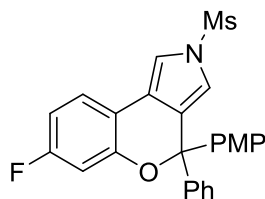

**2k**

Compound **2k** was prepared in 93% yield (42.2 mg) according to the general procedure. Pale yellow solid (mp 150-151 °C). <sup>1</sup>H NMR (400 MHz, CDCl<sub>3</sub>) δ 7.33 (d, *J* = 2.4 Hz, 1H), 7.32 – 7.26 (m, 6H), 7.17 (d, *J* = 8.8 Hz, 2H), 6.80 (d, *J* = 8.8 Hz, 2H), 6.76 (dd, *J* = 10.0, 2.4 Hz, 1H), 6.70 (d, *J* = 2.4 Hz, 1H), 6.67 – 6.59 (m, 1H), 3.76 (s, 3H), 3.16 (s, 3H); <sup>13</sup>C NMR (100 MHz, CDCl<sub>3</sub>) δ 162.7 (d, *J* = 245.0 Hz), 159.2, 153.6 (d, *J* = 12.0 Hz), 143.0, 134.9, 129.0, 128.0, 127.9(0), 127.8(7), 127.4, 124.3 (d, *J* = 10.0 Hz), 120.6, 117.7, 115.1 (d, *J* = 3.0 Hz), 113.3, 112.9, 109.4 (d, *J* = 22.0 Hz), 106.4 (d, *J* = 24.0 Hz), 83.6, 55.2, 42.9; <sup>19</sup>F NMR (376 MHz, CDCl<sub>3</sub>) δ -111.6; IR (neat): 2959, 2929, 1609, 1510, 1367, 1172, 1068, 984, 769, 509; HRESIMS Calcd for [C<sub>25</sub>H<sub>20</sub>FNNaO<sub>4</sub>S]<sup>+</sup> (M + Na<sup>+</sup>) 472.0989, found 472.0975.

**7-Chloro-4-(4-methoxyphenyl)-2-(methylsulfonyl)-4-phenyl-2,4-dihydrochromeno[3,4-*c*]pyrrole (2l)**

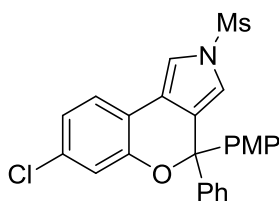

**2l**

Compound **2l** was prepared in 90% yield (42.0 mg) according to the general procedure. Pale yellow oil. <sup>1</sup>H NMR (400 MHz, CDCl<sub>3</sub>) δ 7.36 (d, *J* = 2.0 Hz, 1H), 7.33 – 7.27 (m, 5H), 7.26 (d, *J* = 7.2 Hz, 1H), 7.16 (d, *J* = 8.8 Hz, 2H), 7.04 (d, *J* = 2.0 Hz, 1H), 6.89 (dd, *J* = 8.0, 2.0 Hz, 1H), 6.80 (d, *J* = 8.8 Hz, 2H), 6.70 (d, *J* = 2.0 Hz, 1H), 3.76 (s, 3H), 3.17 (s, 3H); <sup>13</sup>C NMR (100 MHz, CDCl<sub>3</sub>) δ 159.2, 153.0, 143.0, 134.9, 133.7, 129.0, 128.1, 128.0, 127.9, 127.4, 124.1, 122.4, 120.4, 119.2, 117.8, 117.4, 113.4(2),

113.3(5), 83.5, 55.2, 42.9; IR (neat): 2959, 2929, 1609, 1510, 1255, 1172, 1033, 984, 768, 701; HRESIMS Calcd for  $[C_{25}H_{20}ClNNaO_4S]^+$  ( $M + Na^+$ ) 488.0694, found 488.0690.

**7-Bromo-4-(4-methoxyphenyl)-2-(methylsulfonyl)-4-phenyl-2,4-dihydrochromeno[3,4-*c*]pyrrole (2m)**

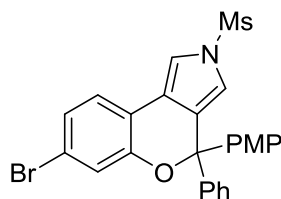

**2m**

Compound **2m** was prepared in 88% yield (45.0 mg) according to the general procedure. Pale yellow solid (mp 109-110 °C).  $^1H$  NMR (400 MHz,  $CDCl_3$ )  $\delta$  7.37 (d,  $J = 2.0$  Hz, 1H), 7.33 – 7.26 (m, 5H), 7.22 (d,  $J = 8.4$  Hz, 1H), 7.20 (d,  $J = 2.0$  Hz, 1H), 7.15 (d,  $J = 8.8$  Hz, 2H), 7.04 (dd,  $J = 8.4, 2.0$  Hz, 1H), 6.80 (d,  $J = 8.8$  Hz, 2H), 6.69 (d,  $J = 2.0$  Hz, 1H), 3.77 (s, 3H), 3.17 (s, 3H);  $^{13}C$  NMR (100 MHz,  $CDCl_3$ )  $\delta$  159.2, 153.1, 143.0, 134.9, 129.0, 128.1, 128.0, 127.9, 127.4, 125.2, 124.4, 122.0, 121.4, 120.5, 117.8(1), 117.7(7), 113.5, 113.4, 83.5, 55.2, 42.9; IR (neat): 2957, 2928, 1608, 1510, 1466, 1368, 1253, 1172, 1070, 770; HRESIMS Calcd for  $[C_{25}H_{20}BrNNaO_4S]^+$  ( $M + Na^+$ ) 532.0189, found 532.0180.

**4-(4-Methoxyphenyl)-8-methyl-2-(methylsulfonyl)-4-phenyl-2,4-dihydrochromeno[3,4-*c*]pyrrole (2n)**

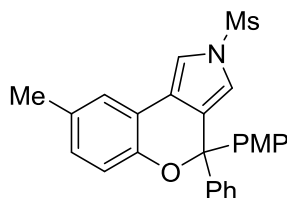

**2n**

Compound **2n** was prepared in 84% yield (35.6 mg) according to the general procedure. Pale yellow solid (mp 86-87 °C).  $^1H$  NMR (400 MHz,  $CDCl_3$ )  $\delta$  7.40 – 7.26 (m, 6H), 7.19 (d,  $J = 8.8$  Hz, 3H), 6.95 – 6.90 (m, 2H), 6.79 (d,  $J = 8.8$  Hz, 2H), 6.69 (d,  $J = 2.0$

Hz, 1H), 3.76 (s, 3H), 3.16 (s, 3H), 2.24 (s, 3H);  $^{13}\text{C}$  NMR (100 MHz,  $\text{CDCl}_3$ )  $\delta$  159.1, 150.3, 143.5, 135.4, 131.3, 129.6, 129.0, 128.8, 128.0, 127.7, 127.5, 123.7, 121.5, 118.6, 118.3, 117.6, 113.3, 113.2, 82.8, 55.2, 42.9, 20.7; IR (neat): 2960, 2927, 1609, 1509, 1366, 1255, 1171, 1069, 769, 507; HRESIMS Calcd for  $[\text{C}_{26}\text{H}_{23}\text{NNaO}_4\text{S}]^+$  ( $\text{M} + \text{Na}^+$ ) 468.1240, found 468.1225.

**8-Fluoro-4-(4-methoxyphenyl)-2-(methylsulfonyl)-4-phenyl-2,4-dihydro-chromeno[3,4-c]pyrrole (2o)**

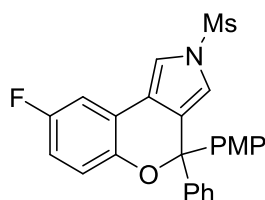

**2o**

Compound **2o** was prepared in 80% yield (39.6 mg) according to the general procedure. Pale yellow solid (mp 155-156 °C).  $^1\text{H}$  NMR (400 MHz,  $\text{CDCl}_3$ )  $\delta$  7.44 – 7.34 (m, 1H), 7.31 – 7.21 (m, 5H), 7.17 (d,  $J = 8.8$  Hz, 2H), 7.04 (dd,  $J = 8.4, 2.8$  Hz, 1H), 6.97 (dd,  $J = 8.8, 4.8$  Hz, 1H), 6.79 (d,  $J = 8.8$  Hz, 3H), 6.73 – 6.66 (m, 1H), 3.75 (s, 3H), 3.16 (s, 3H);  $^{13}\text{C}$  NMR (100 MHz,  $\text{CDCl}_3$ )  $\delta$  159.1, 157.8 (d,  $J = 238.0$  Hz), 148.4, 143.1, 135.0, 129.0, 128.4, 128.0, 127.8, 127.5, 120.8 (d,  $J = 2.0$  Hz), 120.0 (d,  $J = 8.0$  Hz), 119.7 (d,  $J = 8.0$  Hz), 117.7, 115.3 (d,  $J = 24.0$  Hz), 113.9, 113.3, 109.6 (d,  $J = 24.0$  Hz), 83.1, 55.2, 42.9;  $^{19}\text{F}$  NMR (376 MHz,  $\text{CDCl}_3$ )  $\delta$  -121.2; IR (neat): 2958, 2930, 1609, 1510, 1478, 1369, 1176, 1068, 770, 508; HRESIMS Calcd for  $[\text{C}_{25}\text{H}_{20}\text{FNNaO}_4\text{S}]^+$  ( $\text{M} + \text{Na}^+$ ) 472.0989, found 472.0975.

**8-Chloro-4-(4-methoxyphenyl)-2-(methylsulfonyl)-4-phenyl-2,4-dihydro-chromeno[3,4-c]pyrrole (2p)**

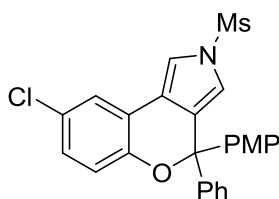

**2p**



Compound **2p** was prepared in 92% yield (42.9 mg) according to the general procedure. Pale yellow solid (mp 94-95 °C). <sup>1</sup>H NMR (400 MHz, CDCl<sub>3</sub>) δ 7.38 (d, *J* = 2.0 Hz, 1H), 7.34 (d, *J* = 2.0 Hz, 1H), 7.32 – 7.25 (m, 5H), 7.16 (d, *J* = 8.8 Hz, 2H), 7.05 (dd, *J* = 8.8, 2.4 Hz, 1H), 6.96 (d, *J* = 8.8 Hz, 1H), 6.80 (d, *J* = 8.8 Hz, 2H), 6.70 (d, *J* = 2.0 Hz, 1H), 3.77 (s, 3H), 3.18 (s, 3H); <sup>13</sup>C NMR (100 MHz, CDCl<sub>3</sub>) δ 159.2, 151.0, 143.0, 134.9, 129.0, 128.5, 128.2, 128.0, 127.9, 127.5, 126.9, 123.2, 120.4, 120.2(1), 120.1(9), 117.8, 113.8, 113.3, 83.3, 55.2, 43.0; IR (neat): 3135, 2930, 1609, 1510, 1369, 1172, 1067, 983, 770, 531; HRESIMS Calcd for [C<sub>25</sub>H<sub>20</sub>ClNNaO<sub>4</sub>S]<sup>+</sup> (M + Na<sup>+</sup>) 488.0694, found 488.0688.

**8-Bromo-4-(4-methoxyphenyl)-2-(methylsulfonyl)-4-phenyl-2,4-dihydrochromeno[3,4-*c*]pyrrole (2q)**

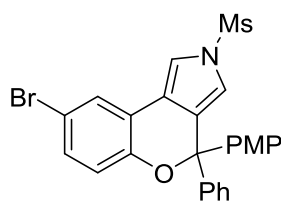

**2q**

Compound **2q** was prepared in 85% yield (43.4 mg) according to the general procedure. Pale yellow solid (mp 101-102 °C). <sup>1</sup>H NMR (400 MHz, CDCl<sub>3</sub>) δ 7.48 (d, *J* = 2.0 Hz, 1H), 7.38 (d, *J* = 2.0 Hz, 1H), 7.33 – 7.26 (m, 5H), 7.19 (dd, *J* = 8.8, 2.0 Hz, 1H), 7.16 (d, *J* = 8.8 Hz, 2H), 6.91 (d, *J* = 8.8 Hz, 1H), 6.80 (d, *J* = 8.8 Hz, 2H), 6.70 (d, *J* = 2.0 Hz, 1H), 3.77 (s, 3H), 3.18 (s, 3H); <sup>13</sup>C NMR (100 MHz, CDCl<sub>3</sub>) δ 159.2, 151.5, 143.0, 134.9, 131.4, 129.0, 128.2, 128.0, 127.9, 127.5, 126.1, 120.7(3), 120.6(5), 120.2, 117.8, 114.3, 113.8, 113.3, 83.3, 55.2, 43.0; IR (neat): 3134, 2930, 1609, 1510, 1368, 1252, 1172, 1067, 770, 701; HRESIMS Calcd for [C<sub>25</sub>H<sub>20</sub>BrNNaO<sub>4</sub>S]<sup>+</sup> (M + Na<sup>+</sup>) 532.0189, found 532.0176.

**6-Bromo-4-(4-methoxyphenyl)-2-(methylsulfonyl)-4-phenyl-2,4-dihydrochromeno[3,4-*c*]pyrrole (2r)**

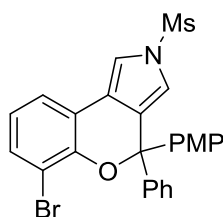

**2r**

Compound **2r** was prepared in 72% yield (36.7 mg) according to the general procedure. Pale yellow solid (mp 202-203 °C). <sup>1</sup>H NMR (400 MHz, CDCl<sub>3</sub>) δ 7.41 – 7.36 (m, 3H), 7.36 – 7.24 (m, 7H), 6.82 – 6.73 (m, 4H), 3.75 (s, 3H), 3.15 (s, 3H); <sup>13</sup>C NMR (100 MHz, CDCl<sub>3</sub>) δ 159.1, 149.2, 143.0, 134.9, 132.1, 128.8, 128.1, 128.0, 127.8, 127.2, 122.9, 122.3, 120.8, 120.4, 117.6, 113.9, 113.3, 113.0, 84.1, 55.1, 42.9; IR (neat): 3133, 2929, 1608, 1510, 1437, 1368, 1174, 1064, 771; HRESIMS Calcd for [C<sub>25</sub>H<sub>20</sub>BrNNaO<sub>4</sub>S]<sup>+</sup> (M + Na<sup>+</sup>) 532.0189, found 532.0180.

**9-Chloro-4-(4-methoxyphenyl)-2-(methylsulfonyl)-4-phenyl-2,4-dihydrochromeno[3,4-c]pyrrole (2s)**

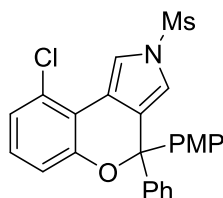

**2s**

Compound **2s** was prepared in 54% yield (25.2 mg) according to the general procedure. Pale yellow solid (mp 78-79 °C). <sup>1</sup>H NMR (400 MHz, CDCl<sub>3</sub>) δ 7.95 (d, *J* = 2.0 Hz, 1H), 7.33 – 7.26 (m, 5H), 7.16 (d, *J* = 8.8 Hz, 2H), 7.04 – 6.93 (m, 3H), 6.80 (d, *J* = 8.8 Hz, 2H), 6.69 (d, *J* = 2.0 Hz, 1H), 3.76 (s, 3H), 3.19 (s, 3H); <sup>13</sup>C NMR (100 MHz, CDCl<sub>3</sub>) δ 159.2, 153.7, 142.9, 134.8, 130.9, 129.0, 128.7, 128.2, 128.0, 127.9, 127.5, 123.6, 118.2(7), 118.2(5), 117.7, 117.6, 116.9, 113.3, 82.9, 55.2, 42.9; IR (neat): 3059, 2929, 1608, 1509, 1370, 1252, 1173, 1069, 983, 771; HRESIMS Calcd for [C<sub>25</sub>H<sub>20</sub>ClNNaO<sub>4</sub>S]<sup>+</sup> (M + Na<sup>+</sup>) 488.0694, found 488.0684.

**4-(4-(Benzyloxy)phenyl)-2-(methylsulfonyl)-4-phenyl-2,4-dihydrochromeno[3,4-**

### c]pyrrole (2t)

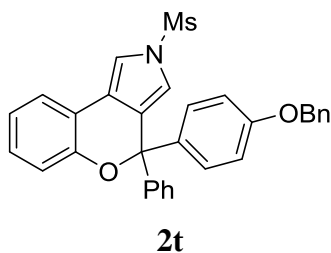

Compound **2t** was prepared in 92% yield (41.4 mg) according to the general procedure. Pale yellow solid (mp 93-94 °C). <sup>1</sup>H NMR (400 MHz, CDCl<sub>3</sub>) δ 7.43 – 7.29 (m, 8H), 7.29 – 7.21 (m, 3H), 7.19 (d, *J* = 8.8 Hz, 3H), 7.10 – 7.04 (m, 1H), 7.02 (d, *J* = 7.6 Hz, 1H), 6.93 – 6.77 (m, 3H), 6.70 (d, *J* = 2.0 Hz, 1H), 4.94 (s, 2H), 2.99 (s, 3H); <sup>13</sup>C NMR (100 MHz, CDCl<sub>3</sub>) δ 158.3, 152.3, 143.3, 136.7, 135.5, 128.9, 128.7, 128.5, 128.3, 127.9(1), 127.8(9), 127.7, 127.4(3), 127.4(0), 123.3, 122.0, 121.1, 118.8, 118.6, 117.5, 114.1, 113.3, 82.9, 69.9, 42.6; IR (neat): 3032, 2927, 2855, 1738, 1606, 1508, 1367, 1069, 983, 769; HRESIMS Calcd for [C<sub>31</sub>H<sub>25</sub>NNaO<sub>4</sub>S]<sup>+</sup> (M + Na<sup>+</sup>) 530.1397, found 530.1391.

### 2-(Methylsulfonyl)-4-(4-phenoxyphenyl)-4-phenyl-2,4-dihydrochromeno[3,4-c]pyrrole (2u)

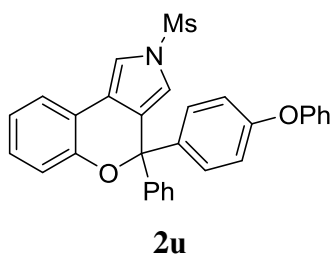

Compound **2u** was prepared in 93% yield (45.9 mg) according to the general procedure. Pale yellow solid (mp 91-92 °C). <sup>1</sup>H NMR (400 MHz, CDCl<sub>3</sub>) δ 7.40 – 7.35 (m, 2H), 7.35 – 7.26 (m, 7H), 7.24 (d, *J* = 8.8 Hz, 2H), 7.15 – 7.07 (m, 2H), 7.04 (dd, *J* = 8.0, 0.8 Hz, 1H), 7.02 – 6.97 (m, 2H), 6.93 (dd, *J* = 7.2, 1.2 Hz, 1H), 6.88 (d, *J* = 8.8 Hz, 2H), 6.72 (d, *J* = 2.4 Hz, 1H), 3.15 (s, 3H); <sup>13</sup>C NMR (100 MHz, CDCl<sub>3</sub>) δ 157.1, 156.5, 152.3, 143.1, 137.8, 129.7, 129.2, 128.9, 128.3, 128.0, 127.8, 127.5, 123.6, 123.4, 122.1, 121.2, 119.4, 118.9, 118.6, 117.7, 117.6, 113.4, 82.9, 42.9; IR (neat): 2961, 2926, 2854,

1588, 1489, 1235, 1173, 1069, 753, 696; HRESIMS Calcd for  $[C_{30}H_{23}NNaO_4S]^+$  ( $M + Na^+$ ) 516.1240, found 516.1241.

**2-(Methylsulfonyl)-4-phenyl-4-(*p*-tolyl)-2,4-dihydrochromeno[3,4-*c*]pyrrole (2v)**

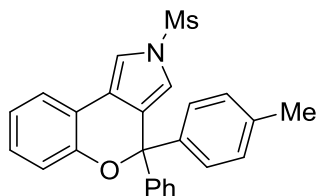

**2v**

Compound **2v** was prepared in 74% yield (30.8 mg) according to the general procedure. Pale yellow solid (mp 187-188 °C).  $^1H$  NMR (400 MHz,  $CDCl_3$ )  $\delta$  7.40 – 7.34 (m, 2H), 7.34 – 7.23 (m, 5H), 7.18 (d,  $J = 8.0$  Hz, 2H), 7.14 – 7.09 (m, 1H), 7.08 (d,  $J = 8.0$  Hz, 2H), 7.04 (dd,  $J = 8.0, 1.2$  Hz, 1H), 6.94 – 6.86 (m, 1H), 6.71 (d,  $J = 2.0$  Hz, 1H), 3.13 (s, 3H), 2.30 (s, 3H);  $^{13}C$  NMR (100 MHz,  $CDCl_3$ )  $\delta$  152.4, 143.3, 140.2, 137.5, 128.8, 128.7, 128.4, 128.0, 127.7, 127.5, 123.4, 122.0, 121.3, 118.9, 118.7, 117.7, 113.3, 83.1, 42.8, 21.0; IR (neat): 3026, 2958, 2926, 1470, 1367, 1174, 1069, 769, 576; HRESIMS Calcd for  $[C_{25}H_{21}NNaO_3S]^+$  ( $M + Na^+$ ) 438.1134, found 438.1120.

**4-(4-(*tert*-butyl)phenyl)-2-(methylsulfonyl)-4-phenyl-2,4-dihydrochromeno[3,4-*c*]pyrrole (2w)**

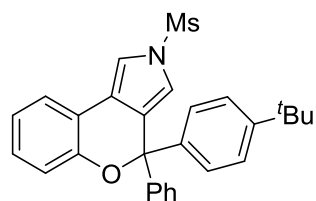

**2w**

Compound **2w** was prepared in 75% yield (34.3 mg) according to the general procedure. Pale yellow solid (mp 99-100 °C).  $^1H$  NMR (400 MHz,  $CDCl_3$ )  $\delta$  7.38 – 7.34 (m, 2H), 7.33 – 7.26 (m, 5H), 7.25 – 7.17 (m, 4H), 7.16 – 7.08 (m, 1H), 7.05 (d,  $J = 7.6$  Hz, 1H), 6.94 – 6.86 (m, 1H), 6.73 (d,  $J = 2.0$  Hz, 1H), 3.13 (s, 3H), 1.28 (s, 9H);  $^{13}C$  NMR (100 MHz,  $CDCl_3$ )  $\delta$  152.5, 150.6, 143.2, 140.2, 128.8, 128.4, 127.9, 127.7, 127.6, 127.2, 124.9, 123.4, 122.0, 121.3, 118.9, 118.6, 117.7, 113.3, 83.1, 42.8, 34.5, 31.3; IR (neat):

2960, 2855, 1600, 1470, 1266, 1069, 983, 794; HRESIMS Calcd for  $[C_{28}H_{27}NNaO_3S]^+$  (M + Na<sup>+</sup>) 480.1604, found 480.1590.

**4-(3,4-Dimethoxyphenyl)-2-(methylsulfonyl)-4-phenyl-2,4-dihydrochromeno[3,4-c]pyrrole (2x)**

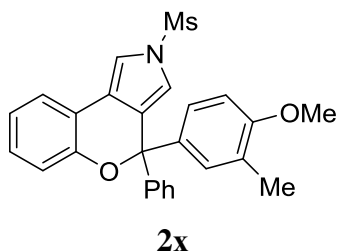

Compound **2x** was prepared in 83% yield (37.0 mg) according to the general procedure. Pale yellow solid (mp 184-185 °C). <sup>1</sup>H NMR (400 MHz, CDCl<sub>3</sub>) δ 7.40 – 7.20 (m, 7H), 7.15 – 7.07 (m, 2H), 7.03 (d, *J* = 8.0 Hz, 1H), 7.01 – 6.94 (m, 1H), 6.93 – 6.84 (m, 1H), 6.70 (d, *J* = 1.6 Hz, 1H), 6.67 (d, *J* = 8.8 Hz, 1H), 3.76 (s, 3H), 3.10 (s, 3H), 2.13 (s, 3H); <sup>13</sup>C NMR (100 MHz, CDCl<sub>3</sub>) δ 157.3, 152.5, 143.5, 134.8, 129.9, 128.8, 128.6, 127.9, 127.6, 127.5, 126.3, 126.1, 123.3, 122.0, 121.3, 118.9, 118.7, 117.7, 113.3, 108.9, 83.0, 55.2, 42.8, 16.4; IR (neat): 2926, 2853, 1608, 1505, 1367, 1255, 1173, 1069, 982, 750; HRESIMS Calcd for  $[C_{26}H_{23}NNaO_4S]^+$  (M + Na<sup>+</sup>) 468.1240, found 468.1227.

**4-(3,4-Dimethoxyphenyl)-2-(methylsulfonyl)-4-phenyl-2,4-dihydrochromeno[3,4-c]pyrrole (2y)**

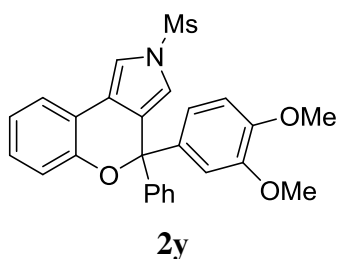

Compound **2y** was prepared in 93% yield (42.9 mg) according to the general procedure. Pale yellow solid (mp 90-91 °C). <sup>1</sup>H NMR (400 MHz, CDCl<sub>3</sub>) δ 7.44 – 7.25 (m, 7H), 7.15 – 7.09 (m, 1H), 7.05 (dd, *J* = 8.4, 0.8 Hz, 1H), 6.99 (d, *J* = 2.0 Hz, 1H), 6.94 – 6.87 (m, 1H), 6.74 – 6.67 (m, 2H), 6.64 (dd, *J* = 8.4, 2.0 Hz, 1H), 3.82 (s, 3H), 3.76 (s, 3H), 3.13 (s, 3H); <sup>13</sup>C NMR (100 MHz, CDCl<sub>3</sub>) δ 152.4, 148.6(4), 148.5(8), 143.2, 135.6,

128.8, 128.5, 127.9, 127.8, 127.5, 123.4, 122.1, 121.2, 120.5, 118.8, 118.7, 117.6, 113.3, 111.0, 110.0, 83.1, 55.8, 55.7, 42.8; IR (neat): 3022, 2929, 2837, 1738, 1600, 1514, 1367, 1173, 1070, 753; HRESIMS Calcd for  $[C_{26}H_{23}NNaO_5S]^+$  ( $M + Na^+$ ) 484.1189, found 484.1178.

**4-(Benzo[d][1,3]dioxol-5-yl)-2-(methylsulfonyl)-4-phenyl-2,4-dihydrochromeno[3,4-c]pyrrole (2z)**

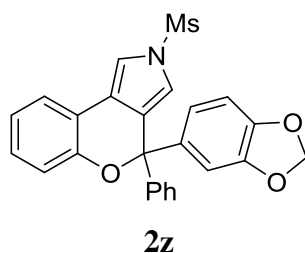

Compound **2z** was prepared in 95% yield (42.7 mg) according to the general procedure. Pale yellow solid (mp 74-75 °C).  $^1H$  NMR (400 MHz,  $CDCl_3$ )  $\delta$  7.40 – 7.25 (m, 7H), 7.15 – 7.08 (m, 1H), 7.03 (d,  $J = 7.6$  Hz, 1H), 6.94 – 6.89 (m, 1H), 6.87 – 6.82 (m, 1H), 6.71 (d,  $J = 2.0$  Hz, 1H), 6.68 – 6.62 (m, 2H), 5.90 (s, 2H), 3.14 (s, 3H);  $^{13}C$  NMR (100 MHz,  $CDCl_3$ )  $\delta$  152.2, 147.6, 147.2, 143.2, 137.2, 128.8, 128.3, 128.0, 127.8, 127.4, 123.4, 122.1, 121.5, 121.2, 118.9, 118.7, 117.7, 113.4, 108.4, 107.3, 101.1, 83.0, 42.8; IR (neat): 2955, 2925, 1738, 1601, 1487, 1367, 1173, 1068, 1038, 756; HRESIMS Calcd for  $[C_{25}H_{19}NNaO_5S]^+$  ( $M + Na^+$ ) 468.0876, found 468.0867.

**2-(Methylsulfonyl)-4-(naphthalen-2-yl)-4-phenyl-2,4-dihydrochromeno[3,4-c]pyrrole (2aa)**

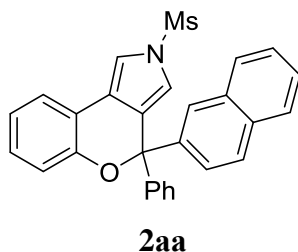

Compound **2aa** was prepared in 87% yield (39.3 mg) according to the general procedure. Pale yellow solid (mp 117-118 °C).  $^1H$  NMR (400 MHz,  $CDCl_3$ )  $\delta$  7.83 – 7.69 (m, 3H), 7.65 – 7.58 (m, 1H), 7.53 (dd,  $J = 8.8, 2.0$  Hz, 1H), 7.48 – 7.42 (m, 2H),

7.41 (d,  $J = 2.0$  Hz, 1H), 7.39 – 7.34 (m, 3H), 7.33 – 7.25 (m, 3H), 7.15 – 7.05 (m, 2H), 6.94 – 6.86 (m, 1H), 6.75 (d,  $J = 2.0$  Hz, 1H), 3.13 (s, 3H);  $^{13}\text{C}$  NMR (100 MHz,  $\text{CDCl}_3$ )  $\delta$  152.3, 143.1, 140.6, 132.8, 132.6, 128.9, 128.4, 128.1, 128.0, 127.9, 127.5(3), 127.4(7), 126.7, 126.4, 126.2, 125.6, 123.4, 122.2, 121.3, 118.9, 118.7, 117.8, 113.5, 83.2, 42.9; IR (neat): 3058, 2928, 1600, 1368, 1174, 1069, 770, 574; HRESIMS Calcd for  $[\text{C}_{28}\text{H}_{21}\text{NNaO}_3\text{S}]^+$  ( $\text{M} + \text{Na}^+$ ) 474.1134, found 474.1119.

**2-(Methylsulfonyl)-4-phenyl-4-(thiophen-3-yl)-2,4-dihydrochromeno[3,4-c]pyrrole (2ab)**

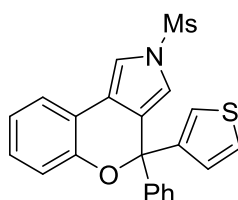

**2ab**

Compound **2ab** was prepared in 71% yield (29.0 mg) according to the general procedure. Pale yellow oil.  $^1\text{H}$  NMR (400 MHz,  $\text{CDCl}_3$ )  $\delta$  7.41 – 7.34 (m, 4H), 7.33 – 7.25 (m, 3H), 7.24 – 7.20 (m, 1H), 7.16 – 7.09 (m, 1H), 7.07 – 7.00 (m, 2H), 6.96 – 6.88 (m, 2H), 6.76 (d,  $J = 2.0$  Hz, 1H), 3.14 (s, 3H);  $^{13}\text{C}$  NMR (100 MHz,  $\text{CDCl}_3$ )  $\delta$  152.2, 144.9, 142.7, 128.9, 128.3, 128.1, 127.9, 127.3, 127.1, 125.9, 124.3, 123.4, 122.2, 121.1, 118.7, 118.5, 117.1, 113.3, 80.8, 42.8; IR (neat): 2960, 2926, 2854, 1599, 1470, 1367, 1172, 1069, 765; HRESIMS Calcd for  $[\text{C}_{22}\text{H}_{17}\text{NNaO}_3\text{S}_2]^+$  ( $\text{M} + \text{Na}^+$ ) 430.0542, found 430.0524.

**4-(4-Methoxyphenyl)-2-(methylsulfonyl)-4-(*p*-tolyl)-2,4-dihydrochromeno[3,4-c]pyrrole (2ac)**

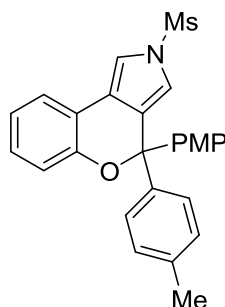

## 2ac

Compound **2ac** was prepared in 87% yield (35.2 mg) according to the general procedure. Pale yellow solid (mp 156-157 °C). <sup>1</sup>H NMR (400 MHz, CDCl<sub>3</sub>) δ 7.39 – 7.32 (m, 2H), 7.23 – 7.15 (m, 4H), 7.13 – 7.05 (m, 3H), 7.02 (d, *J* = 8.0 Hz, 1H), 6.92 – 6.86 (m, 1H), 6.78 (d, *J* = 8.4 Hz, 2H), 6.69 (d, *J* = 1.6 Hz, 1H), 3.74 (s, 3H), 3.11 (s, 3H), 2.30 (s, 3H); <sup>13</sup>C NMR (100 MHz, CDCl<sub>3</sub>) δ 159.0, 152.5, 140.4, 137.4, 135.5, 128.9, 128.7(7), 128.7(5), 128.7, 127.5, 123.3, 122.0, 121.3, 118.9, 118.7, 117.6, 113.3, 113.2, 82.9, 55.1, 42.8, 21.0; IR (neat): 3025, 2927, 2854, 1608, 1510, 1367, 1254, 1174, 1070, 765; HRESIMS Calcd for [C<sub>26</sub>H<sub>23</sub>NNaO<sub>4</sub>S]<sup>+</sup> (M + Na<sup>+</sup>) 468.1240, found 468.1226.

## 4,4-Bis(4-methoxyphenyl)-2-(methylsulfonyl)-2,4-dihydrochromeno[3,4-c]pyrrole (2ad)

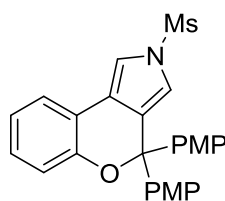

## 2ad

Compound **2ad** was prepared in 90% yield (41.5 mg) according to the general procedure. Pale yellow solid (mp 117-118 °C). <sup>1</sup>H NMR (400 MHz, CDCl<sub>3</sub>) δ 7.40 – 7.33 (m, 2H), 7.21 (d, *J* = 8.8 Hz, 4H), 7.15 – 7.07 (m, 1H), 7.02 (d, *J* = 7.2 Hz, 1H), 6.93 – 6.87 (m, 1H), 6.80 (d, *J* = 8.8 Hz, 4H), 6.68 (d, *J* = 2.4 Hz, 1H), 3.76 (s, 6H), 3.15 (s, 3H); <sup>13</sup>C NMR (100 MHz, CDCl<sub>3</sub>) δ 159.0, 152.5, 135.5, 128.9, 128.8, 123.3, 122.0, 121.4, 118.9, 118.7, 117.5, 113.2, 82.8, 55.2, 42.8; IR (neat): 2956, 2930, 2837, 1608, 1509, 1367, 1252, 1174, 1069, 769; HRESIMS Calcd for [C<sub>26</sub>H<sub>23</sub>NNaO<sub>5</sub>S]<sup>+</sup> (M + Na<sup>+</sup>) 484.1189, found 484.1178.

## 4-([1,1'-Biphenyl]-4-yl)-4-(4-methoxyphenyl)-2-(methylsulfonyl)-2,4-dihydrochromeno[3,4-c]pyrrole (2ae)



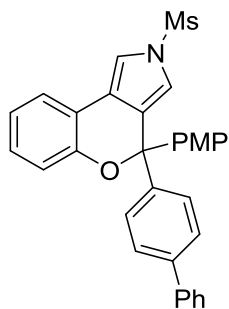

**2ae**

Compound **2ae** was prepared in 52% yield (26.4 mg) according to the general procedure. Pale yellow solid (mp 200-201 °C). <sup>1</sup>H NMR (400 MHz, CDCl<sub>3</sub>) δ 7.54 (d, *J* = 8.0 Hz, 2H), 7.51 (d, *J* = 8.0 Hz, 2H), 7.44 – 7.34 (m, 6H), 7.34 – 7.28 (m, 1H), 7.24 (d, *J* = 8.8 Hz, 2H), 7.15 – 7.09 (m, 1H), 7.05 (d, *J* = 8.0 Hz, 1H), 6.95 – 6.87 (m, 1H), 6.80 (d, *J* = 8.8 Hz, 2H), 6.77 – 6.71 (m, 1H), 3.74 (s, 3H), 3.12 (s, 3H); <sup>13</sup>C NMR (100 MHz, CDCl<sub>3</sub>) δ 159.1, 152.4, 142.4, 140.5, 135.2, 129.0, 128.8, 128.7, 128.5, 127.9, 127.3, 127.0, 126.7, 123.4, 122.1, 121.3, 118.9, 118.6, 117.6, 113.3(4), 113.3(1), 82.8, 55.1, 42.8; IR (neat): 3029, 2926, 2854, 1607, 1506, 1471, 1259, 1069, 1034, 764; HRESIMS Calcd for [C<sub>31</sub>H<sub>25</sub>NNaO<sub>4</sub>S]<sup>+</sup> (M + Na<sup>+</sup>) 530.1397, found 530.1386.

**4-(4-Chlorophenyl)-4-(4-methoxyphenyl)-2-(methylsulfonyl)-2,4-dihydrochromeno[3,4-c]pyrrole (2af)**

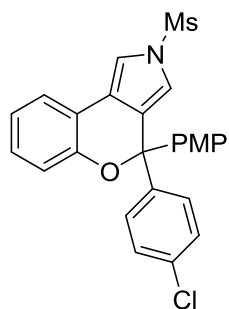

**2af**

Compound **2af** was prepared in 85% yield (39.6 mg) according to the general procedure. Pale yellow solid (mp 88-89 °C). <sup>1</sup>H NMR (400 MHz, CDCl<sub>3</sub>) δ 7.37 (d, *J* = 8.0 Hz, 2H), 7.28 – 7.22 (m, 4H), 7.18 (d, *J* = 8.8 Hz, 2H), 7.15 – 7.08 (m, 1H), 7.01 (d, *J* = 8.0 Hz, 1H), 6.95 – 6.88 (m, 1H), 6.80 (d, *J* = 8.8 Hz, 2H), 6.70 – 6.66 (m, 1H), 3.76 (s, 3H), 3.17 (s, 3H); <sup>13</sup>C NMR (100 MHz, CDCl<sub>3</sub>) δ 159.2, 152.2, 142.0, 134.9, 133.7,

129.0, 128.9(1), 128.8(6), 128.2, 123.4, 122.3, 121.2, 118.8, 118.6, 117.5, 113.5, 113.4, 82.5, 55.2, 42.9; IR (neat): 3010, 2929, 2854, 1608, 1510, 1367, 1174, 1070, 765; HRESIMS Calcd for  $[C_{25}H_{20}ClNNaO_4S]^+$  ( $M + Na^+$ ) 488.0694, found 488.0681.

### General procedure for the synthesis of chiral chromeno[3,4-*c*]pyrroles (+)-2:

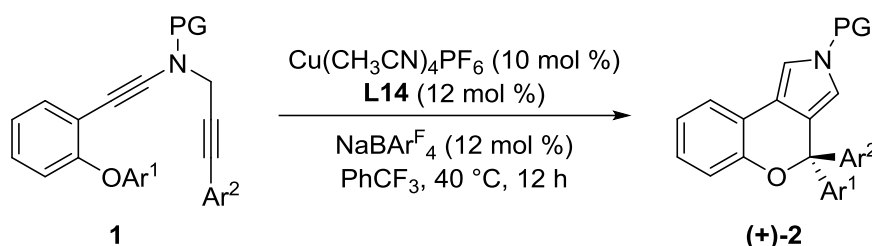

The powdered  $Cu(CH_3CN)_4PF_6$  (0.01 mmol, 3.7 mg), **L14** (0.012 mmol, 8.0 mg) and  $NaBARF_4$  (0.012 mmol, 10.6 mg) were introduced into a vial. After  $PhCF_3$  (2 mL) was injected into the vial, the solution was stirred at 40 °C for 2 h. Then, the *N*-propargyl ynamide **1** (0.1 mmol) was introduced into the system subsequently. The resulting mixture was stirred at 40 °C and the progress of the reaction was monitored by TLC. After concentration in vacuo, the residue was purified by flash chromatography on silica gel (eluent: hexanes/ethyl acetate) to give the desired chiral chromeno[3,4-*c*]pyrrole (+)-2.

### (*R*)-4-(4-methoxyphenyl)-2-(methylsulfonyl)-4-phenyl-2,4-dihydrochromeno[3,4-*c*]pyrrole ((+)-2a)

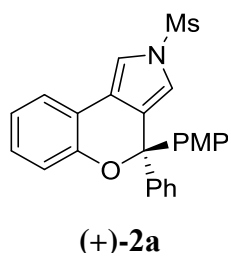

Compound (+)-2a was prepared in 96% yield (41.4 mg) according to the general procedure.  $[\alpha]_D^{20} = +63.1$  ( $c = 1.0$ ,  $CHCl_3$ ). 94% ee (determined by HPLC: Chiralpak IB Column, 90/10 hexane/*i*-PrOH, 1.0 mL/min, 254 nm; TR = 16.67 min (major), 18.96 min (minor)).

**(R)-4-(4-methoxyphenyl)-4-phenyl-2-(propylsulfonyl)-2,4-dihydrochromeno[3,4-c]pyrrole ((+)-2b)**

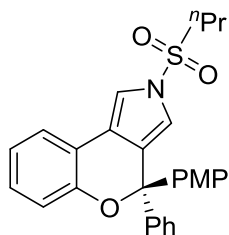

**(+)-2b**

Compound (+)-**2b** was prepared in 84% yield (38.6 mg) according to the general procedure.  $[\alpha]_D^{20} = +48.5$  (c = 1.0, CHCl<sub>3</sub>). 85% ee (determined by HPLC: Chiralpak IA Column, 90/10 hexane/*i*-PrOH, 1.0 mL/min, 254 nm; TR = 10.79 min (minor), 13.57 min (major)).

**(R)-2-(isopropylsulfonyl)-4-(4-methoxyphenyl)-4-phenyl-2,4-dihydrochromeno[3,4-c]pyrrole ((+)-2c)**

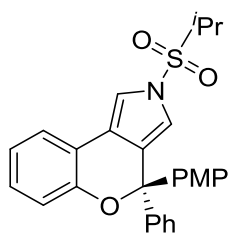

**(+)-2c**

Compound (+)-**2c** was prepared in 77% yield (35.4 mg) according to the general procedure.  $[\alpha]_D^{20} = +35.4$  (c = 1.0, CHCl<sub>3</sub>). 86% ee (determined by HPLC: Chiralpak IE Column, 98/2 hexane/*i*-PrOH, 1.0 mL/min, 254 nm; TR = 32.86 min (minor), 34.66 min (major)).

**(R)-2-((4-bromophenyl)sulfonyl)-4-(4-methoxyphenyl)-4-phenyl-2,4-dihydrochromeno[3,4-c]pyrrole ((+)-2d)**

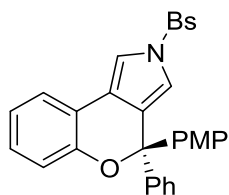

**(+)-2d**

Compound **(+)-2d** was prepared in 85% yield (48.7 mg) according to the general procedure.  $[\alpha]_D^{20} = +33.8^\circ$  ( $c = 1.0$ ,  $\text{CHCl}_3$ ). 88% ee (determined by HPLC: Chiralpak IE Column, 95/5 hexane/*i*-PrOH, 1.0 mL/min, 254 nm; TR = 15.41 min (minor), 16.18 min (major)).

**(R)-4-(4-methoxyphenyl)-2-((4-nitrophenyl)sulfonyl)-4-phenyl-2,4-dihydrochromeno[3,4-*c*]pyrrole ((+)-2e)**

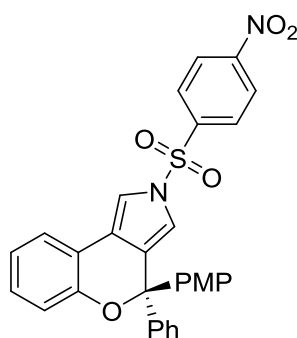

**(+)-2e**

Compound **(+)-2e** was prepared in 96% yield (51.7 mg) according to the general procedure.  $[\alpha]_D^{20} = +26.9^\circ$  ( $c = 1.0$ ,  $\text{CHCl}_3$ ). 85% ee (determined by HPLC: Chiralpak IB Column, 90/10 hexane/*i*-PrOH, 1.0 mL/min, 254 nm; TR = 32.73 min (major), 40.80 min (minor)).

**(R)-4-(4-methoxyphenyl)-4-phenyl-2-((4-(trifluoromethyl)phenyl)sulfonyl)-2,4-dihydrochromeno[3,4-*c*]pyrrole ((+)-2f)**

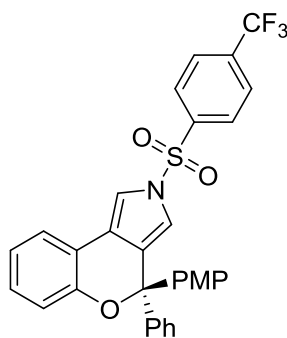

**(+)-2f**

Compound (+)-**2f** was prepared in 99% yield (56.1 mg) according to the general procedure.  $[\alpha]_D^{20} = +36.1^\circ$  (c = 1.0, CHCl<sub>3</sub>). 86% ee (determined by HPLC: Chiralpak IE Column, 98/2 hexane/*i*-PrOH, 1.0 mL/min, 254 nm; TR = 14.51 min (minor), 15.37 min (major)).

**(R)-4-(4-methoxyphenyl)-4-phenyl-2-tosyl-2,4-dihydrochromeno[3,4-c]pyrrole ((+)-2g)**

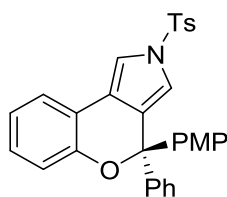

**(+)-2g**

Compound (+)-**2g** was prepared in 69% yield (35.0 mg) according to the general procedure.  $[\alpha]_D^{20} = +30.2^\circ$  (c = 1.0, CHCl<sub>3</sub>). 78% ee (determined by HPLC: Chiralpak IG Column, 80/20 hexane/*i*-PrOH, 1.0 mL/min, 254 nm; TR = 14.46 min (minor), 17.37 min (major)).

**(R)-4-(4-methoxyphenyl)-2-((4-methoxyphenyl)sulfonyl)-4-phenyl-2,4-dihydrochromeno[3,4-c]pyrrole ((+)-2h)**

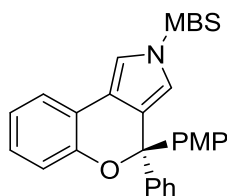

**(+)-2h**

Compound (+)-**2h** was prepared in 60% yield (29.7 mg) according to the general procedure.  $[\alpha]_D^{20} = +40.8^\circ$  (c = 1.0, CHCl<sub>3</sub>). 79% ee (determined by HPLC: Chiralpak IE Column, 95/5 hexane/*i*-PrOH, 1.0 mL/min, 254 nm; TR = 33.87 min (minor), 37.48 min (major)).

**(R)-4-(4-methoxyphenyl)-7-methyl-2-(methylsulfonyl)-4-phenyl-2,4-dihydrochromeno[3,4-c]pyrrole ((+)-2i)**

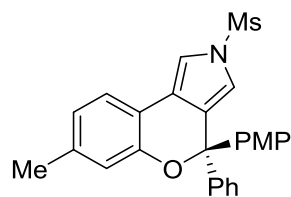

**(+)-2i**

Compound **(+)-2i** was prepared in 91% yield (40.5 mg) according to the general procedure.  $[\alpha]_D^{20} = +29.5^\circ$  ( $c = 1.0$ ,  $\text{CHCl}_3$ ). 91% ee (determined by HPLC: Chiralpak IB Column, 90/10 hexane/*i*-PrOH, 1.0 mL/min, 254 nm; TR = 13.07 min (major), 14.11 min (minor)).

**(*R*)-7-methoxy-4-(4-methoxyphenyl)-2-(methylsulfonyl)-4-phenyl-2,4-dihydrochromeno[3,4-*c*]pyrrole ((+)-2j)**

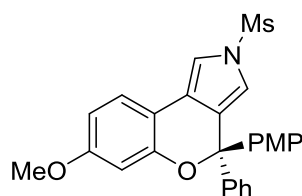

**(+)-2j**

Compound **(+)-2j** was prepared in 91% yield (42.0 mg) according to the general procedure.  $[\alpha]_D^{20} = +23.8^\circ$  ( $c = 1.0$ ,  $\text{CHCl}_3$ ). 91% ee (determined by HPLC: Chiralpak IB Column, 90/10 hexane/*i*-PrOH, 1.0 mL/min, 254 nm; TR = 16.01 min (major), 17.57 min (minor)).

**(*R*)-7-fluoro-4-(4-methoxyphenyl)-2-(methylsulfonyl)-4-phenyl-2,4-dihydrochromeno[3,4-*c*]pyrrole ((+)-2k)**

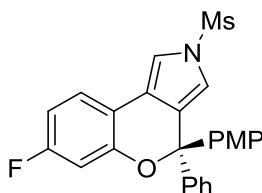

**(+)-2k**

Compound **(+)-2k** was prepared in 99% yield (44.9 mg) according to the general procedure.  $[\alpha]_D^{20} = +38.2^\circ$  ( $c = 1.0$ ,  $\text{CHCl}_3$ ). 91% ee (determined by HPLC: Chiralpak

IA Column, 80/20 hexane/*i*-PrOH, 1.0 mL/min, 254 nm; TR = 10.38 min (minor), 11.85 min (major)).

**(*R*)-7-chloro-4-(4-methoxyphenyl)-2-(methylsulfonyl)-4-phenyl-2,4-dihydrochromeno[3,4-*c*]pyrrole ((+)-2l)**

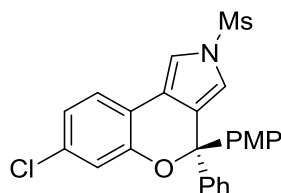

**(+)-2l**

Compound (+)-**2l** was prepared in 92% yield (42.9 mg) according to the general procedure.  $[\alpha]_D^{20} = +36.3^\circ$  ( $c = 1.0$ ,  $\text{CHCl}_3$ ). 90% ee (determined by HPLC: Chiralpak IA Column, 90/10 hexane/*i*-PrOH, 1.0 mL/min, 254 nm; TR = 20.29 min (minor), 26.31 min (major)).

**(*R*)-7-bromo-4-(4-methoxyphenyl)-2-(methylsulfonyl)-4-phenyl-2,4-dihydrochromeno[3,4-*c*]pyrrole ((+)-2m)**

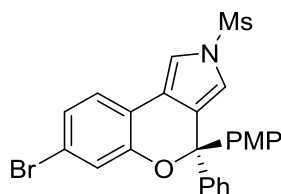

**(+)-2m**

Compound (+)-**2m** was prepared in 92% yield (47.0 mg) according to the general procedure.  $[\alpha]_D^{20} = +33.1^\circ$  ( $c = 1.0$ ,  $\text{CHCl}_3$ ). 85% ee (determined by HPLC: Chiralpak IG Column, 50/50 hexane/*i*-PrOH, 1.0 mL/min, 254 nm; TR = 8.54 min (minor), 12.58 min (major)).

**(*R*)-4-(4-methoxyphenyl)-8-methyl-2-(methylsulfonyl)-4-phenyl-2,4-dihydrochromeno[3,4-*c*]pyrrole ((+)-2n)**

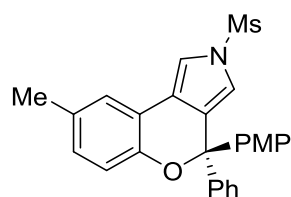

**(+)-2n**

Compound **(+)-2n** was prepared in 80% yield (35.6 mg) according to the general procedure.  $[\alpha]_D^{20} = +38.9^\circ$  ( $c = 1.0$ ,  $\text{CHCl}_3$ ). 80% ee (determined by HPLC: Chiralpak IG Column, 50/50 hexane/*i*-PrOH, 1.0 mL/min, 254 nm; TR = 7.68 min (minor), 8.99 min (major)).

**(*R*)-4-(4-(benzyloxy)phenyl)-2-(methylsulfonyl)-4-phenyl-2,4-dihydrochromeno[3,4-*c*]pyrrole ((+)-2t)**

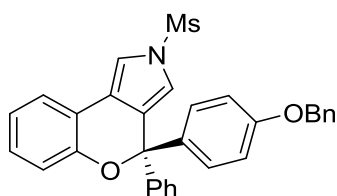

**(+)-2t**

Compound **(+)-2t** was prepared in 94% yield (42.3 mg) according to the general procedure.  $[\alpha]_D^{20} = +43.0^\circ$  ( $c = 1.0$ ,  $\text{CHCl}_3$ ). 95% ee (determined by HPLC: Chiralpak IA Column, 70/30 hexane/*i*-PrOH, 1.0 mL/min, 254 nm; TR = 12.12 min (major), 16.63 min (minor)).

**(*R*)-2-(methylsulfonyl)-4-(4-phenoxyphenyl)-4-phenyl-2,4-dihydrochromeno[3,4-*c*]pyrrole ((+)-2u)**

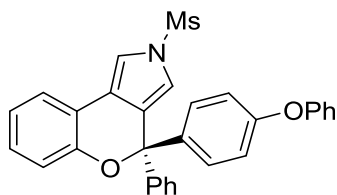

**(+)-2u**

Compound **(+)-2u** was prepared in 94% yield (46.4 mg) according to the general procedure.  $[\alpha]_D^{20} = +25.5^\circ$  ( $c = 1.0$ ,  $\text{CHCl}_3$ ). 94% ee (determined by HPLC: Chiralpak



IB Column, 90/10 hexane/*i*-PrOH, 1.0 mL/min, 254 nm; TR = 19.01 min (minor), 28.11 min (major)).

**(*R*)-2-(methylsulfonyl)-4-phenyl-4-(*p*-tolyl)-2,4-dihydrochromeno[3,4-*c*]pyrrole ((+)-2v)**

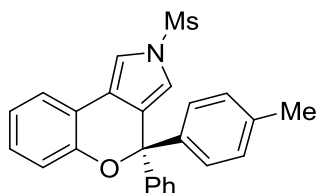

**(+)-2v**

Compound (+)-2v was prepared in 83% yield (34.5 mg) according to the general procedure.  $[\alpha]_D^{20} = +28.8^\circ$  ( $c = 1.0$ ,  $\text{CHCl}_3$ ). 94% ee (determined by HPLC: Chiralpak IB Column, 90/10 hexane/*i*-PrOH, 1.0 mL/min, 254 nm; TR = 10.05 min (major), 10.98 min (minor)).

**(*R*)-4-(4-(*tert*-butyl)phenyl)-2-(methylsulfonyl)-4-phenyl-2,4-dihydrochromeno[3,4-*c*]pyrrole ((+)-2w)**

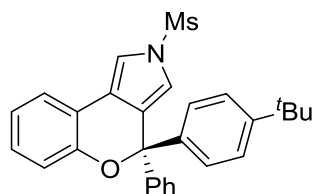

**(+)-2w**

Compound (+)-2w was prepared in 92% yield (42.1 mg) according to the general procedure.  $[\alpha]_D^{20} = +38.9^\circ$  ( $c = 1.0$ ,  $\text{CHCl}_3$ ). 94% ee (determined by HPLC: Chiralpak IA Column, 90/10 hexane/*i*-PrOH, 1.0 mL/min, 254 nm; TR = 7.69 min (major), 9.09 min (minor)).

**(*R*)-4-(3,4-dimethoxyphenyl)-2-(methylsulfonyl)-4-phenyl-2,4-dihydrochromeno[3,4-*c*]pyrrole ((+)-2x)**

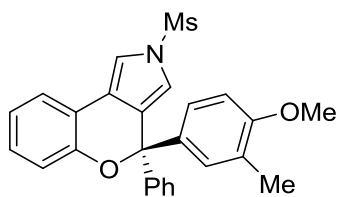

**(+)-2x**

Compound **(+)-2x** was prepared in 96% yield (42.8 mg) according to the general procedure.  $[\alpha]_D^{20} = +43.1$  °(c = 1.0, CHCl<sub>3</sub>). 93% ee (determined by HPLC: Chiralpak IB Column, 80/20 hexane/*i*-PrOH, 1.0 mL/min, 254 nm; TR = 8.29 min (major), 9.82 min (minor)).

**(*R*)-4-(3,4-dimethoxyphenyl)-2-(methylsulfonyl)-4-phenyl-2,4-dihydrochromeno[3,4-*c*]pyrrole ((+)-2y)**

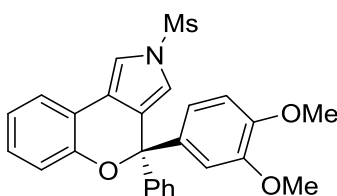

**(+)-2y**

Compound **(+)-2y** was prepared in 95% yield (43.8 mg) according to the general procedure.  $[\alpha]_D^{20} = +74.1$  °(c = 1.0, CHCl<sub>3</sub>). 94% ee (determined by HPLC: Chiralpak IA Column, 90/10 hexane/*i*-PrOH, 1.0 mL/min, 254 nm; TR = 21.20 min (minor), 31.28 min (major)).

**(*R*)-4-(benzo[*d*][1,3]dioxol-5-yl)-2-(methylsulfonyl)-4-phenyl-2,4-dihydrochromeno-[3,4-*c*]pyrrole ((+)-2z)**

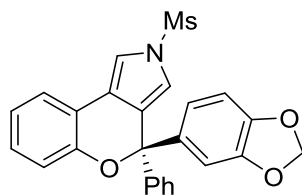

**(+)-2z**

Compound **(+)-2z** was prepared in 99% yield (44.5 mg) according to the general procedure.  $[\alpha]_D^{20} = +41.8$  °(c = 1.0, CHCl<sub>3</sub>). 96% ee (determined by HPLC: Chiralpak

IA Column, 90/10 hexane/*i*-PrOH, 1.0 mL/min, 254 nm; TR = 19.21 min (major), 22.56 min (minor)).

**(*R*)-2-(methylsulfonyl)-4-(naphthalen-2-yl)-4-phenyl-2,4-dihydrochromeno[3,4-*c*]pyrrole ((+)-2aa)**

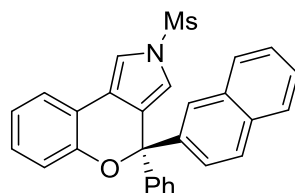

**(+)-2aa**

Compound (+)-**2aa** was prepared in 86% yield (38.8 mg) according to the general procedure.  $[\alpha]_D^{20} = +25.6^\circ$  ( $c = 1.0$ ,  $\text{CHCl}_3$ ). 93% ee (determined by HPLC: Chiralpak IB Column, 90/10 hexane/*i*-PrOH, 1.0 mL/min, 254 nm; TR = 11.77 min (major), 12.77 min (minor)).

**(*S*)-2-(methylsulfonyl)-4-phenyl-4-(thiophen-3-yl)-2,4-dihydrochromeno[3,4-*c*]pyrrole ((+)-2ab)**

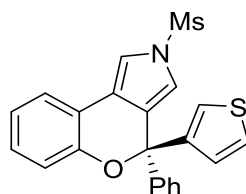

**(+)-2ab**

Compound (+)-**2ab** was prepared in 93% yield (38.0 mg) according to the general procedure.  $[\alpha]_D^{20} = +39.8^\circ$  ( $c = 1.0$ ,  $\text{CHCl}_3$ ). 95% ee (determined by HPLC: Chiralpak IG Column, 90/10 hexane/*i*-PrOH, 1.0 mL/min, 254 nm; TR = 12.59 min (minor), 13.32 min (major)).

**(*R*)-4-(4-methoxyphenyl)-2-(methylsulfonyl)-4-(*p*-tolyl)-2,4-dihydrochromeno[3,4-*c*]pyrrole ((+)-2ac)**

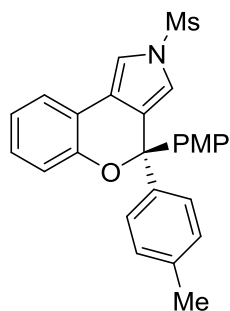

**(+)-2ac**

Compound **(+)-2ac** was prepared in 96% yield (38.8 mg) according to the general procedure.  $[\alpha]_D^{20} = +26.8^\circ$  ( $c = 1.0$ ,  $\text{CHCl}_3$ ). 95% ee (determined by HPLC: Chiralpak IB Column, 95/5 hexane/*i*-PrOH, 1.0 mL/min, 254 nm; TR = 21.76 min (major), 23.59 min (minor)).

**(*R*)-4-([1,1'-biphenyl]-4-yl)-4-(4-methoxyphenyl)-2-(methylsulfonyl)-2,4-dihydrochromeno[3,4-*c*]pyrrole ((+)-2ae)**

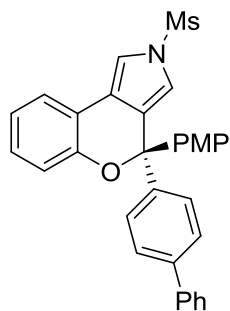

**(+)-2ae**

Compound **(+)-2ae** was prepared in 95% yield (48.2 mg) according to the general procedure.  $[\alpha]_D^{20} = +24.0^\circ$  ( $c = 1.0$ ,  $\text{CHCl}_3$ ). 93% ee (determined by HPLC: Chiralpak IB Column, 90/10 hexane/*i*-PrOH, 1.0 mL/min, 254 nm; TR = 23.23 min (minor), 26.67 min (major)).

**(*S*)-4-(4-chlorophenyl)-4-(4-methoxyphenyl)-2-(methylsulfonyl)-2,4-dihydrochromeno[3,4-*c*]pyrrole ((+)-2af)**

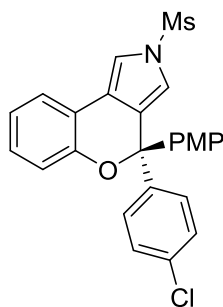

**(+)-2af**

Compound **(+)-2af** was prepared in 99% yield (46.1 mg) according to the general procedure.  $[\alpha]_D^{20} = +28.0^\circ$  ( $c = 1.0$ ,  $\text{CHCl}_3$ ). 93% ee (determined by HPLC: Chiralpak IB Column, 95/5 hexane/*i*-PrOH, 1.0 mL/min, 254 nm; TR = 25.07 min (major), 28.32 min (minor)).

**(S)-4-(4-methoxyphenyl)-2-(methylsulfonyl)-4-phenyl-2,4-dihydrochromeno[3,4-c]pyrrole ((-)-2a)**

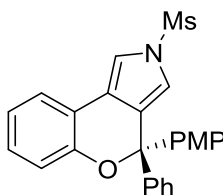

**(-)-2a**

Compound **(-)-2a** was prepared in 96% yield (41.4 mg) according to the general procedure.  $[\alpha]_D^{20} = -57.2^\circ$  ( $c = 1.0$ ,  $\text{CHCl}_3$ ). 94% ee (determined by HPLC: Chiralpak IB Column, 90/10 hexane/*i*-PrOH, 1.0 mL/min, 254 nm; TR = 17.70 min (minor), 19.31 min (major)).

***Tert*-butyl 4-(4-methoxyphenyl)-4-phenylchromeno[3,4-*c*]pyrrole-2(4*H*)-carboxylate (3a)**

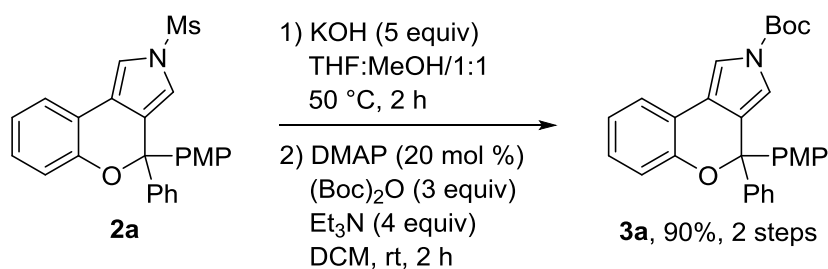

Compound **3a** was prepared in 90% yield (40.8 mg, two steps) according to the known procedure (0.10 mmol scale).<sup>4</sup> Pale yellow oil. <sup>1</sup>H NMR (400 MHz, CDCl<sub>3</sub>) δ 7.46 (d, *J* = 1.2 Hz, 1H), 7.41 – 7.32 (m, 3H), 7.32 – 7.22 (m, 5H), 7.11 – 7.04 (m, 1H), 7.04 – 6.98 (m, 1H), 6.92 – 6.84 (m, 1H), 6.83 – 6.75 (m, 3H), 3.75 (s, 3H), 1.59 (s, 9H); <sup>13</sup>C NMR (100 MHz, CDCl<sub>3</sub>) δ 158.9, 152.4, 148.9, 143.9, 135.9, 129.1, 128.1, 127.8, 127.7, 127.5, 126.9, 123.2, 121.8, 119.6, 119.5, 118.7, 117.1, 113.2, 112.7, 84.2, 83.1, 55.2, 28.0; IR (neat): 2980, 2933, 1743, 1510, 1397, 1254, 1153, 979, 753; HRESIMS Calcd for [C<sub>29</sub>H<sub>27</sub>NNaO<sub>4</sub>]<sup>+</sup> (M + Na<sup>+</sup>) 476.1832, found 476.1821.

#### 1-Bromo-4-(4-methoxyphenyl)-4-phenyl-2,4-dihydrochromeno[3,4-c]pyrrole (**4a**)

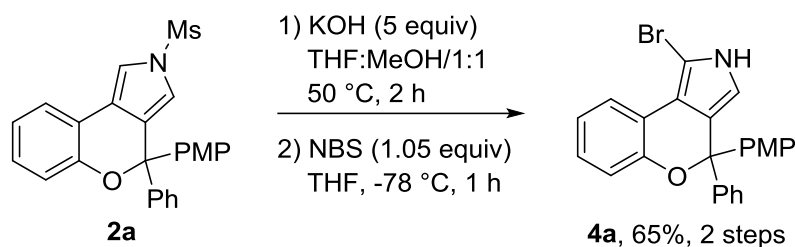

Compound **4a** was prepared in 65% yield (56.2 mg, two steps) according to the known procedure (0.20 mmol scale).<sup>4</sup> White solid (mp 82-83 °C). <sup>1</sup>H NMR (400 MHz, CDCl<sub>3</sub>) δ 8.13 (s, 1H), 7.89 (dd, *J* = 7.6, 1.2 Hz, 1H), 7.38 – 7.30 (m, 2H), 7.29 – 7.22 (m, 3H), 7.21 (d, *J* = 8.8 Hz, 2H), 7.09 – 6.98 (m, 2H), 6.95 – 6.88 (m, 1H), 6.77 (d, *J* = 8.8 Hz, 2H), 6.23 (d, *J* = 2.4 Hz, 1H), 3.74 (s, 3H); <sup>13</sup>C NMR (100 MHz, CDCl<sub>3</sub>) δ 158.9, 152.0, 144.1, 136.2, 129.2, 127.8, 127.7, 127.4, 125.1, 122.3, 121.4, 120.1, 118.5, 116.0, 114.0, 113.1, 94.1, 83.2, 55.2; IR (neat): 3399, 2932, 1608, 1508, 1466, 1242, 1176, 1032, 754, 700; HRESIMS Calcd for [C<sub>24</sub>H<sub>18</sub>BrNNaO<sub>2</sub>]<sup>+</sup> (M + Na<sup>+</sup>) 454.0413, found 454.0410.

#### 4-(4-methoxyphenyl)-4-phenylchromeno[3,4-c]pyrrole-1,3(2*H*,4*H*)-dione (**5a**)

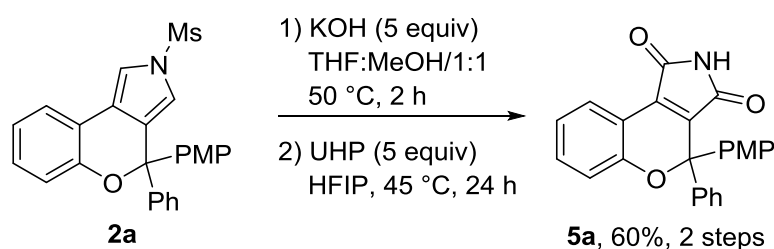

Compound **5a** was prepared in 60% yield (46.0 mg, two steps) according to the known procedure (0.20 mmol scale).<sup>6</sup> Pale yellow oil. <sup>1</sup>H NMR (400 MHz, CDCl<sub>3</sub>) δ 8.00 (dd, *J* = 8.0, 1.2 Hz, 1H), 7.49 – 7.39 (m, 3H), 7.39 – 7.32 (m, 4H), 7.30 (d, *J* = 8.8 Hz, 2H), 7.04 (d, *J* = 8.0 Hz, 1H), 6.99 (t, *J* = 7.6 Hz, 1H), 6.87 (d, *J* = 8.8 Hz, 2H), 3.79 (s, 3H); <sup>13</sup>C NMR (100 MHz, CDCl<sub>3</sub>) δ 168.1, 167.7, 159.7, 154.5, 141.4, 133.8, 133.4, 133.3, 133.0, 129.1, 128.6, 128.2, 127.6, 126.3, 122.2, 117.1, 114.6, 113.6, 83.6, 55.3; IR (neat): 2924, 1766, 1729, 1712, 1604, 1511, 1337, 1255, 1176, 758; HRESIMS Calcd for [C<sub>24</sub>H<sub>17</sub>NNaO<sub>4</sub>]<sup>+</sup> (*M* + Na<sup>+</sup>) 406.1050, found 406.1042.

**(3*aR*,4*R*,9*bR*)-4-(4-methoxyphenyl)-2-(methylsulfonyl)-4-phenyl-1,2,3,3*a*,4,9*b*-hexahydrochromeno[3,4-*c*]pyrrole ((-)-**6a**)**

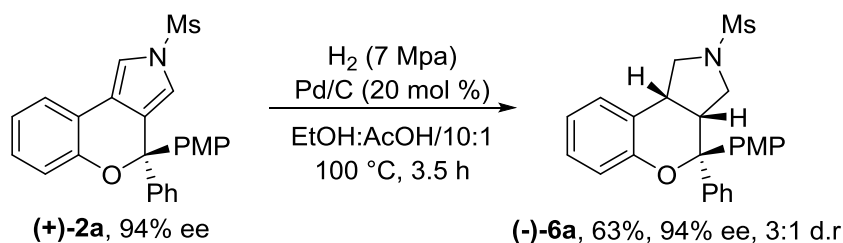

Compound **(-)-6a** was prepared in 63% yield (51.5 mg) according to the known procedure (0.20 mmol scale).<sup>4</sup> Pale yellow oil. [ $\alpha$ ]<sub>D</sub><sup>20</sup> = -39.0° (*c* = 1.0, CHCl<sub>3</sub>). 94% ee (determined by HPLC: Chiralpak IA Column, 95/5 hexane/*i*-PrOH, 1.0 mL/min, 254 nm; TR = 43.53 min (major), 50.95 min (minor)). <sup>1</sup>H NMR (400 MHz, CDCl<sub>3</sub>) δ 7.49 (d, *J* = 8.8 Hz, 4H), 7.25 – 7.10 (m, 5H), 7.05 (d, *J* = 7.6 Hz, 1H), 6.94 – 6.88 (m, 1H), 6.85 (d, *J* = 8.8 Hz, 2H), 3.97 – 3.86 (m, 2H), 3.81 – 3.68 (m, 4H), 3.45 (t, *J* = 6.0 Hz, 1H), 3.36 – 3.22 (m, 2H), 2.25 (s, 3H); <sup>13</sup>C NMR (100 MHz, CDCl<sub>3</sub>) δ 158.7, 153.0, 143.7, 135.9, 128.8, 128.6(9), 128.6(5), 127.4, 125.7(4), 125.7(2), 122.0, 118.1, 114.0, 80.0, 55.9, 55.3, 47.6, 45.2, 36.7, 33.9; IR (neat): 3059, 2930, 2853, 1610, 1512, 1454, 1334, 1251, 1152, 737; HRESIMS Calcd for [C<sub>25</sub>H<sub>25</sub>NNaO<sub>4</sub>S]<sup>+</sup> (*M* + Na<sup>+</sup>) 458.1397, found 458.1393.

## Crystal data and structure refinement for (+)-2a. CCDC Number = 2192857

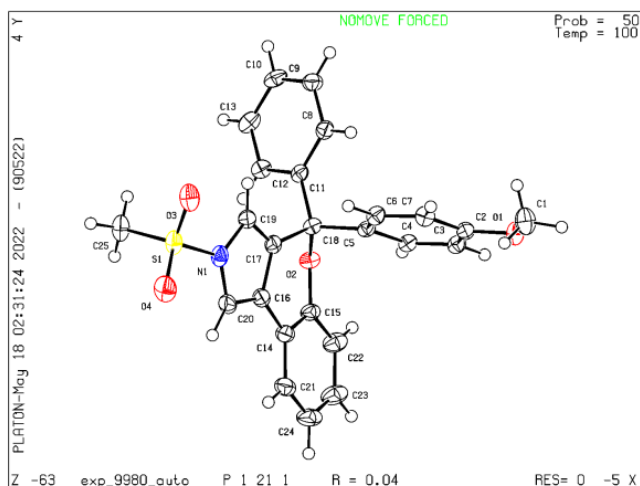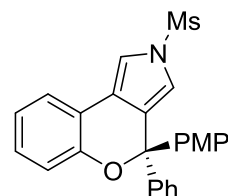

Bond precision: C-C = 0.0050 Å

Wavelength=1.54184

Cell: a=9.1898 (1)  
alpha=90

b=7.9984 (1)  
beta=94.829 (1)

c=14.9186 (2)  
gamma=90

Temperature: 100 K

|                        | Calculated                                         | Reported                                           |
|------------------------|----------------------------------------------------|----------------------------------------------------|
| Volume                 | 1092.68 (2)                                        | 1092.68 (2)                                        |
| Space group            | P 21                                               | P 1 21 1                                           |
| Hall group             | P 2yb                                              | P 2yb                                              |
| Moiety formula         | C <sub>25</sub> H <sub>21</sub> N O <sub>4</sub> S | C <sub>25</sub> H <sub>21</sub> N O <sub>4</sub> S |
| Sum formula            | C <sub>25</sub> H <sub>21</sub> N O <sub>4</sub> S | C <sub>25</sub> H <sub>21</sub> N O <sub>4</sub> S |
| Mr                     | 431.49                                             | 431.49                                             |
| Dx, g cm <sup>-3</sup> | 1.311                                              | 1.311                                              |
| Z                      | 2                                                  | 2                                                  |
| Mu (mm <sup>-1</sup> ) | 1.578                                              | 1.578                                              |
| F000                   | 452.0                                              | 452.0                                              |
| F000'                  | 453.97                                             |                                                    |
| h, k, lmax             | 11, 10, 18                                         | 11, 9, 18                                          |
| Nref                   | 4496 [ 2417]                                       | 4228                                               |
| Tmin, Tmax             | 0.963, 0.969                                       | 0.042, 1.000                                       |
| Tmin'                  | 0.924                                              |                                                    |

Correction method= # Reported T Limits: Tmin=0.042 Tmax=1.000  
AbsCorr = MULTI-SCAN

Data completeness= 1.75/0.94

Theta(max)= 75.086

R(reflections)= 0.0419 ( 4077)

wR2(reflections)=  
0.1248 ( 4228)

S = 1.167

Npar= 282



## Computational Methods.

All calculations were performed using Gaussian 16 package.<sup>7</sup> Geometry optimizations and vibration frequencies were calculated by using M06<sup>8</sup> level of density function theory with the LANL2DZ<sup>9,10</sup> basis set and pseudopotential for the Cu atom, and the 6-31G(d,p) basis set<sup>11,12</sup> for C, H, O, N, P and S atom. All local minimums were confirmed with no imaginary frequency and all transition states had only one imaginary frequency. And every transition state was checked by intrinsic reaction coordinate (IRC). Single-point energies of all the transition states and intermediates were further recomputed at the M06-D3/def2TZVPP level of theory. The SMD solvation model<sup>13</sup> with PhCF<sub>3</sub> was used for all calculations. The ball stick models of molecules were drawn by CYLview 2.0.<sup>14</sup>

## Reference

1. N. Jalalian, E. E. Ishikawa, L. F. Silva and B. Olofsson, *Org. Lett.*, 2011, **13**, 1552.
2. J. D. Priest, L. Male, P. W. Davies, *Tetrahedron*, 2021, **78**, 131757.
3. F.-L. Hong, Z.-S. Wang, D.-D. Wei, T.-Y. Zhai, G.-C. Deng, X. Lu, R.-S. Liu and L.-W. Ye, *J. Am. Chem. Soc.*, 2019, **141**, 16961.
4. F.-L. Hong, C.-Y. Shi, P. Hong, T.-Y. Zhai, X.-Q. Zhu, X. Lu and L.-W. Ye, *Angew. Chem. Int. Ed.*, 2022, **61**, e202115554.
5. S. Wertz, D. Leifert and A. Studer, *Org. Lett.*, 2013, **15**, 928.
6. M. J. Frisch, G. W. Trucks, H. B. Schlegel, G. E. Scuseria, M. A. Robb, J. R. Cheeseman, G. Scalmani, V. Barone, G. A. Petersson, H. Nakatsuji, X. Li, M. Caricato, A. V. Marenich, J. Bloino, B. G. Janesko, R. Gomperts, B. Mennucci, H. P. Hratchian, J. V. Ortiz, A. F. Izmaylov, J. L. Sonnenberg, D. Williams-Young, F. Ding, F. Lipparini, F. Egidi, J. Goings, B. Peng, A. Petrone, T. Henderson, D. Ranasinghe, V. G. Zakrzewski, J. Gao, N. Rega, G. Zheng, W. Liang, M. Hada, M. Ehara, K. Toyota, R. Fukuda, J. Hasegawa, M. Ishida, T. Nakajima, Y. Honda, O. Kitao, H. Nakai, T. Vreven, K. Throssell, J. A. Montgomery, Jr., J. E. Peralta, F. Ogliaro, M. J. Bearpark, J. J. Heyd, E. N. Brothers, K. N. Kudin, V. N. Staroverov, T. A. Keith, R. Kobayashi, J. Normand, K. Raghavachari, A. P. Rendell, J. C. Burant, S. S. Iyengar, J. Tomasi, M. Cossi, J. M.

Millam, M. Klene, C. Adamo, R. Cammi, J. W. Ochterski, R. L. Martin, K. Morokuma, O. Farkas, J. B. Foresman and D. J. Fox, *Gaussian 16, Revision B.01*, Gaussian, Inc., Wallingford CT, 2016.

8. Y. Zhao and D. G. Truhlar, *Theor. Chem. Acc.*, 2008, **120**, 215.

9. W. R. Wadt and P. J. Hay, *J. Chem. Phys.*, 1985, **82**, 284.

10. P. J. Hay and W. R. Wadt, *J. Chem. Phys.*, 1985, **82**, 270.

11. R. Ditchfield, W. J. Hehre and J. A. Pople, *J. Chem. Phys.*, 1971, **54**, 724.

12. W. J. Hehre, R. Ditchfield and J. A. Pople, *J. Chem. Phys.*, 1972, **56**, 2257.

13. A. V. Marenich, C. J. Cramer and D. G. Truhlar, *J. Phys. Chem. B.*, 2009, **113**, 6378.

14. CYLview20; Legault, C. Y. Université de Sherbrooke, 2020, (<http://www.cylview.org>)..

## XYZ Coordinates

1a

**1a**

Electronic Energy= -1718.581093 Hartree  
Gibbs Free Energy= -1718.248569 Hartree

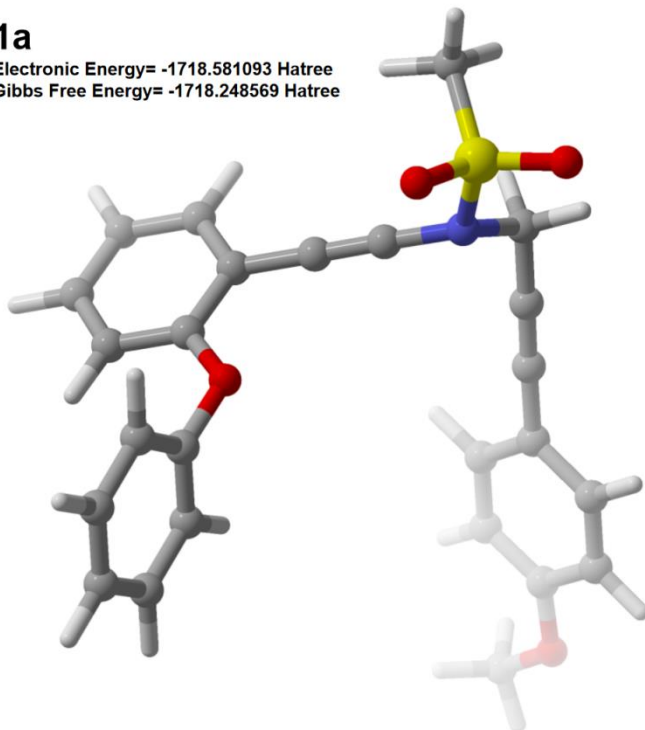

|   |             |             |             |
|---|-------------|-------------|-------------|
| N | 0.88276900  | 2.87109500  | -0.33850400 |
| C | -0.33293400 | 3.55296500  | 0.19624200  |
| H | -0.50021500 | 4.44589000  | -0.41581400 |
| H | -0.14818700 | 3.87754600  | 1.23033800  |
| C | -1.48083700 | 2.67130300  | 0.13368900  |
| C | -2.43780400 | 1.92771400  | 0.09062600  |
| C | -3.57427400 | 1.07120400  | 0.01423300  |
| C | -3.86175100 | 0.16062000  | 1.03837300  |
| C | -4.43214200 | 1.12774000  | -1.09873800 |
| C | -4.96962500 | -0.67445000 | 0.96713700  |
| H | -3.20450700 | 0.10790500  | 1.90333400  |
| C | -5.53639200 | 0.30236200  | -1.17706500 |
| H | -4.21941800 | 1.83005300  | -1.90127000 |
| C | -5.81189700 | -0.60350100 | -0.14518100 |
| H | -5.16628600 | -1.37087200 | 1.77644800  |
| H | -6.20713500 | 0.33755400  | -2.03204500 |
| O | -6.91793800 | -1.36921500 | -0.31447800 |
| C | -7.23786800 | -2.30269400 | 0.70505100  |
| H | -8.14872600 | -2.80967100 | 0.38155900  |
| H | -6.43869700 | -3.04349900 | 0.83323000  |
| H | -7.42492300 | -1.79997700 | 1.66222600  |

|   |            |             |             |
|---|------------|-------------|-------------|
| C | 1.31724200 | 1.78831300  | 0.34433100  |
| C | 1.68091500 | 0.80790300  | 0.96093700  |
| C | 2.11129200 | -0.33488800 | 1.69080300  |
| C | 2.35614000 | -0.25411500 | 3.06905400  |
| C | 2.29891500 | -1.57249900 | 1.04237500  |
| C | 2.77051100 | -1.36576600 | 3.78808900  |
| H | 2.21105600 | 0.70430500  | 3.56206800  |
| C | 2.72053700 | -2.68808200 | 1.75877100  |
| C | 2.95187500 | -2.57741000 | 3.12644800  |
| H | 2.95447300 | -1.28823700 | 4.85598600  |
| H | 2.86746600 | -3.63852800 | 1.25342600  |
| H | 3.28024700 | -3.45523000 | 3.67773600  |
| O | 2.05043400 | -1.58693100 | -0.30119400 |
| C | 2.19493000 | -2.78637000 | -0.99064500 |
| C | 1.11482200 | -3.65536600 | -1.07294700 |
| C | 3.40279500 | -3.05755600 | -1.61879500 |
| C | 1.25131000 | -4.82608700 | -1.81290900 |
| H | 0.18777000 | -3.40657200 | -0.56145600 |
| C | 3.52623200 | -4.23088100 | -2.35733500 |
| H | 4.22421600 | -2.35116700 | -1.52512600 |
| C | 2.45369400 | -5.11426100 | -2.45490000 |
| H | 0.41320800 | -5.51457300 | -1.88822100 |
| H | 4.46516100 | -4.45423000 | -2.85797300 |
| H | 2.55462600 | -6.02928900 | -3.03317300 |
| S | 2.12023800 | 3.87862700  | -0.95475000 |
| O | 3.09490000 | 2.98583300  | -1.56762700 |
| O | 1.45005000 | 4.89004800  | -1.76357600 |
| C | 2.83266100 | 4.63355700  | 0.47700400  |
| H | 3.18043700 | 3.84239300  | 1.14731800  |
| H | 3.67294000 | 5.24918800  | 0.14389200  |
| H | 2.07364200 | 5.25489900  | 0.96015000  |

A

A

Electronic Energy= -5509.282247 Hartree  
Gibbs Free Energy= -5508.199239 Hartree

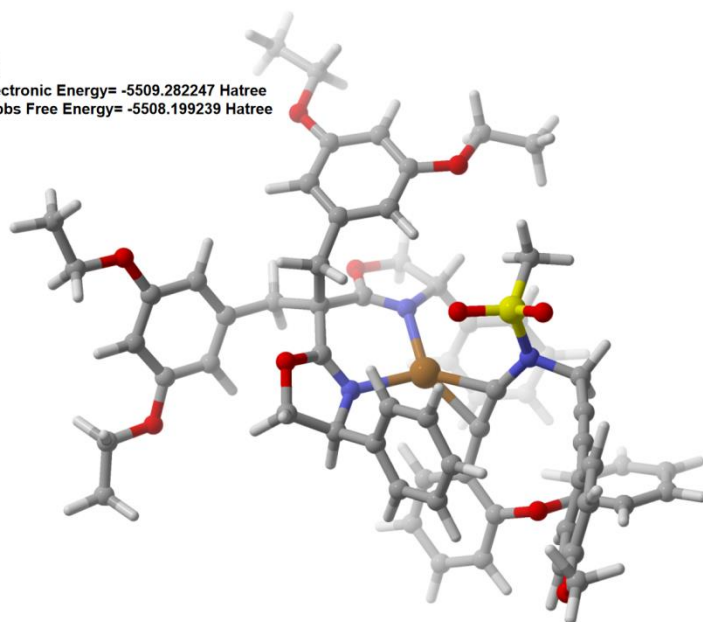

|   |            |             |             |
|---|------------|-------------|-------------|
| N | 2.55832400 | -1.91410200 | -0.60375600 |
| C | 3.99449300 | -2.31175800 | -0.66402100 |
| H | 4.06450600 | -3.24243400 | -1.23921500 |
| H | 4.28862300 | -2.55021900 | 0.36875000  |
| C | 4.82477500 | -1.25991400 | -1.22440600 |
| C | 5.44153600 | -0.32169900 | -1.68409200 |
| C | 6.15678000 | 0.79434100  | -2.20565700 |
| C | 6.56534500 | 1.84008500  | -1.35690000 |
| C | 6.40130500 | 0.90915500  | -3.57938300 |
| C | 7.18957600 | 2.95911000  | -1.87272700 |
| H | 6.36528000 | 1.77119700  | -0.28882700 |
| C | 7.03058900 | 2.03017500  | -4.10595400 |
| H | 6.08319000 | 0.10967100  | -4.24459200 |
| C | 7.42443600 | 3.06192400  | -3.24986800 |
| H | 7.50456100 | 3.77619200  | -1.22820700 |
| H | 7.20592800 | 2.09134000  | -5.17560400 |
| O | 8.03882100 | 4.19895200  | -3.65841000 |
| C | 8.29161300 | 4.35224000  | -5.04624800 |
| H | 8.78114800 | 5.32069000  | -5.16328800 |
| H | 8.95677200 | 3.56398700  | -5.42042900 |
| H | 7.35950400 | 4.34654400  | -5.62494200 |
| C | 2.24852700 | -0.93322200 | 0.27511600  |
| C | 2.38914400 | -0.14513200 | 1.22419100  |
| C | 2.72115200 | 0.74849600  | 2.28875700  |
| C | 1.74430900 | 1.26908200  | 3.15196400  |

|    |             |             |             |
|----|-------------|-------------|-------------|
| C  | 4.05819900  | 1.12462000  | 2.49962400  |
| C  | 2.08598400  | 2.16720700  | 4.15291800  |
| H  | 0.70895800  | 0.96518800  | 3.00768800  |
| C  | 4.40329800  | 2.01123300  | 3.50836100  |
| C  | 3.41523400  | 2.54603700  | 4.32842900  |
| H  | 1.31219400  | 2.56959700  | 4.80123100  |
| H  | 5.45110900  | 2.27263700  | 3.63447100  |
| H  | 3.68676800  | 3.24765500  | 5.11262100  |
| O  | 5.05232600  | 0.63369400  | 1.67950900  |
| C  | 5.64726100  | -0.56377700 | 2.02979600  |
| C  | 5.10679500  | -1.43331700 | 2.97283000  |
| C  | 6.82827700  | -0.87996800 | 1.36134500  |
| C  | 5.75412400  | -2.64193300 | 3.22733800  |
| H  | 4.19122200  | -1.18082500 | 3.50344300  |
| C  | 7.45735700  | -2.08995300 | 1.62310600  |
| H  | 7.23525200  | -0.17517700 | 0.64021000  |
| C  | 6.92291900  | -2.97983100 | 2.55420300  |
| H  | 5.33015200  | -3.32200600 | 3.96413800  |
| H  | 8.37682700  | -2.33606100 | 1.09716600  |
| H  | 7.41951900  | -3.92514700 | 2.75707300  |
| S  | 1.66356700  | -2.07907400 | -2.06383500 |
| O  | 0.56822600  | -1.11612900 | -2.01285400 |
| O  | 2.61078300  | -2.02839300 | -3.17187100 |
| C  | 1.02553200  | -3.71782600 | -1.91901300 |
| H  | 0.34934400  | -3.74024500 | -1.06007400 |
| H  | 0.48813500  | -3.93426800 | -2.84737400 |
| H  | 1.86019100  | -4.41221600 | -1.78437900 |
| Cu | 0.34084600  | -0.26584600 | 0.67955500  |
| C  | -3.06626200 | 0.16639700  | 0.24429800  |
| C  | -4.33227200 | 0.53243600  | 1.08263800  |
| H  | -5.04730700 | -0.28478200 | 0.93613000  |
| H  | -4.03452800 | 0.51188400  | 2.13867000  |
| C  | -3.39841800 | -0.12975100 | -1.26710200 |
| H  | -4.14863600 | 0.60083600  | -1.59079000 |
| H  | -2.48356800 | 0.05167800  | -1.84755800 |
| C  | -2.08616600 | 1.31344600  | 0.26394000  |
| C  | -1.58634300 | 3.45640500  | -0.10858100 |
| C  | -0.40192500 | 2.75000900  | 0.56450400  |
| H  | -1.33376200 | 3.96876000  | -1.03977000 |
| H  | -2.10939700 | 4.14591600  | 0.56432500  |
| H  | -0.15592400 | 3.22727100  | 1.52047900  |
| C  | -2.48120300 | -1.09671400 | 0.83311600  |
| C  | -2.61098800 | -3.08284000 | 1.86199300  |
| C  | -1.20590600 | -2.87397100 | 1.27900800  |

|   |             |             |             |
|---|-------------|-------------|-------------|
| H | -2.63156200 | -3.12419300 | 2.95600400  |
| H | -3.12343000 | -3.95677800 | 1.45067800  |
| H | -1.03667100 | -3.57943100 | 0.45114500  |
| O | -2.50106100 | 2.38225100  | -0.42053800 |
| N | -0.94381600 | 1.39405400  | 0.84998600  |
| C | 0.84532300  | 2.67876300  | -0.27833700 |
| C | 2.06471300  | 3.14076800  | 0.21739300  |
| C | 0.79767500  | 2.12579300  | -1.56137900 |
| C | 3.22080500  | 3.05138400  | -0.55476800 |
| H | 2.10980800  | 3.56498100  | 1.22102800  |
| C | 1.95005300  | 2.03606600  | -2.33448700 |
| H | -0.14999300 | 1.75687600  | -1.95718400 |
| C | 3.16391500  | 2.50350900  | -1.83354500 |
| H | 4.16847700  | 3.41086100  | -0.15532200 |
| H | 1.90074600  | 1.60153600  | -3.33090600 |
| H | 4.06471500  | 2.44629700  | -2.44291300 |
| N | -1.27856600 | -1.51396500 | 0.70775800  |
| O | -3.34659000 | -1.90687500 | 1.44900900  |
| C | -0.05744900 | -2.97192100 | 2.24581200  |
| C | 1.02869600  | -3.79956400 | 1.96450500  |
| C | -0.02645300 | -2.16572700 | 3.38783500  |
| C | 2.13564600  | -3.82290900 | 2.81004500  |
| H | 1.00832900  | -4.42434600 | 1.07088900  |
| C | 1.07298700  | -2.19506600 | 4.23930200  |
| H | -0.86703400 | -1.50418700 | 3.60431400  |
| C | 2.15628100  | -3.02436800 | 3.95044100  |
| H | 2.98159900  | -4.46766000 | 2.57926000  |
| H | 1.08814600  | -1.56652700 | 5.12721400  |
| H | 3.01680400  | -3.04757900 | 4.61701200  |
| C | -5.00415500 | 1.84397300  | 0.79407700  |
| C | -4.63384400 | 2.97780300  | 1.51427700  |
| C | -6.00453200 | 1.93476200  | -0.17064200 |
| C | -5.22717700 | 4.20722400  | 1.23427800  |
| H | -3.85338500 | 2.92751500  | 2.27354600  |
| C | -6.61239900 | 3.16569700  | -0.42887800 |
| H | -6.33544000 | 1.05799200  | -0.72522500 |
| C | -6.22811700 | 4.31634100  | 0.26361200  |
| H | -6.69674700 | 5.27105400  | 0.05480000  |
| C | -3.85441400 | -1.54175300 | -1.50016600 |
| C | -2.89184700 | -2.51574500 | -1.76217100 |
| C | -5.18522900 | -1.91420500 | -1.32768400 |
| C | -3.24425600 | -3.86307900 | -1.76097400 |
| H | -1.84631300 | -2.24673600 | -1.90872200 |
| C | -5.53724500 | -3.26596500 | -1.36826800 |

|   |             |             |             |
|---|-------------|-------------|-------------|
| H | -5.95950100 | -1.17346300 | -1.13474400 |
| C | -4.57049800 | -4.25756600 | -1.56437200 |
| H | -4.84295300 | -5.30697600 | -1.57568700 |
| O | -7.58194400 | 3.15322400  | -1.38113600 |
| O | -4.76425900 | 5.26210400  | 1.95701700  |
| O | -6.85665100 | -3.53425000 | -1.18742300 |
| O | -2.21748500 | -4.73364600 | -1.94283600 |
| C | -5.33043600 | 6.55125400  | 1.72160200  |
| H | -5.18942000 | 6.82888000  | 0.66665300  |
| H | -6.41181100 | 6.52069900  | 1.92038500  |
| C | -4.63555400 | 7.52151200  | 2.63729400  |
| H | -3.56000000 | 7.54808900  | 2.43214800  |
| H | -5.03838900 | 8.52839000  | 2.49130600  |
| H | -4.78234000 | 7.24090700  | 3.68572000  |
| C | -8.25121900 | 4.37553700  | -1.68980400 |
| H | -7.51950300 | 5.11831800  | -2.04037100 |
| H | -8.72724900 | 4.77440900  | -0.78191100 |
| C | -9.27223500 | 4.07313800  | -2.75237800 |
| H | -9.99876200 | 3.33559100  | -2.39505100 |
| H | -9.81282300 | 4.98536800  | -3.02262600 |
| H | -8.79121000 | 3.67829500  | -3.65359000 |
| C | -2.42456600 | -6.11121600 | -1.63040200 |
| H | -2.89275800 | -6.19129300 | -0.63740400 |
| H | -3.10869100 | -6.56164800 | -2.36418900 |
| C | -1.07708700 | -6.78078500 | -1.65283200 |
| H | -0.41226400 | -6.34028100 | -0.89946300 |
| H | -1.18327800 | -7.84787800 | -1.43476200 |
| H | -0.60540200 | -6.67629900 | -2.63628600 |
| C | -7.28059300 | -4.89735200 | -1.18057200 |
| H | -6.74999500 | -5.44333600 | -0.38674900 |
| H | -7.02521300 | -5.36780400 | -2.14146800 |
| C | -8.76663200 | -4.90512200 | -0.94760200 |
| H | -9.28839600 | -4.36293000 | -1.74335400 |
| H | -9.13751000 | -5.93448500 | -0.93253100 |
| H | -9.01258400 | -4.43642200 | 0.01119800  |



TS<sub>A-B</sub>

TS<sub>A-B</sub>

Electronic Energy= -5509.256429 Hartree  
Gibbs Free Energy= -5508.173441 Hartree

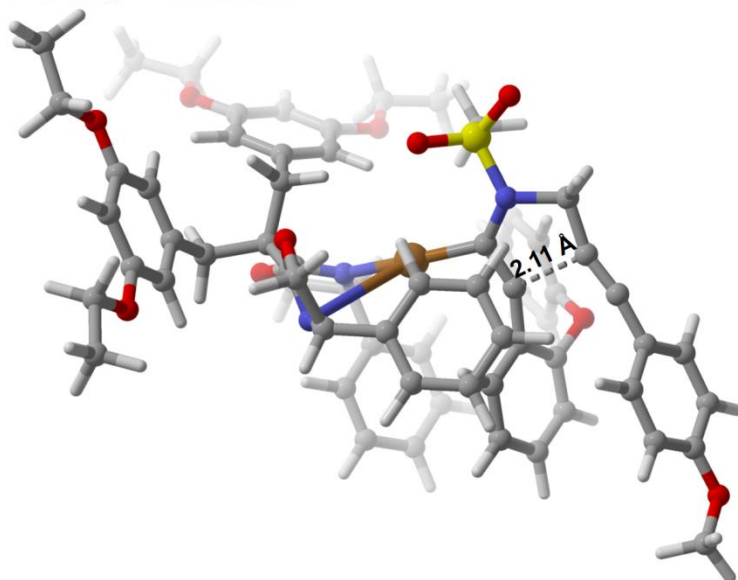

|   |             |             |             |
|---|-------------|-------------|-------------|
| N | 1.78234300  | 0.27284600  | 2.90204800  |
| C | 3.07350700  | 0.20640200  | 3.65359000  |
| H | 2.95183200  | -0.45042500 | 4.52082400  |
| H | 3.36882200  | 1.20276200  | 4.01382200  |
| C | 4.08232000  | -0.30757700 | 2.73684300  |
| C | 5.14479200  | -0.82699000 | 2.38315800  |
| C | 6.26860200  | -1.34063200 | 1.72328900  |
| C | 7.40896000  | -0.53005800 | 1.51414200  |
| C | 6.23897200  | -2.63693400 | 1.17307500  |
| C | 8.47145100  | -1.00484500 | 0.78272500  |
| H | 7.43019500  | 0.47369200  | 1.93090000  |
| C | 7.29508200  | -3.10939500 | 0.41677400  |
| H | 5.35648900  | -3.25732000 | 1.31815400  |
| C | 8.41789500  | -2.29245000 | 0.22012800  |
| H | 9.35800500  | -0.40055600 | 0.61026600  |
| H | 7.24393500  | -4.10314200 | -0.01614800 |
| O | 9.49436100  | -2.65677500 | -0.49498000 |
| C | 9.49271300  | -3.93972300 | -1.11182900 |
| H | 10.44529400 | -4.02414100 | -1.63643700 |
| H | 9.41628000  | -4.73699400 | -0.36343200 |
| H | 8.67006200  | -4.02780800 | -1.83138000 |
| C | 1.89466200  | 0.19288400  | 1.52824900  |
| C | 3.01119600  | -0.08931000 | 0.93097300  |
| C | 3.76579400  | -0.44225800 | -0.22875200 |
| C | 3.44888500  | -1.59922300 | -0.96464100 |

|    |             |             |             |
|----|-------------|-------------|-------------|
| C  | 4.89928000  | 0.30425500  | -0.61086400 |
| C  | 4.23646600  | -1.99667700 | -2.03569200 |
| H  | 2.57211300  | -2.17630100 | -0.67229700 |
| C  | 5.70686300  | -0.11356500 | -1.65896700 |
| C  | 5.37612400  | -1.26485500 | -2.36899900 |
| H  | 3.97280100  | -2.88863600 | -2.59851700 |
| H  | 6.59008500  | 0.47111100  | -1.90587400 |
| H  | 6.00972200  | -1.58721400 | -3.19185000 |
| O  | 5.25378100  | 1.43241800  | 0.10425400  |
| C  | 4.56164600  | 2.59461600  | -0.23696500 |
| C  | 4.87363400  | 3.26170200  | -1.41641800 |
| C  | 3.60300200  | 3.08909900  | 0.63958000  |
| C  | 4.18656100  | 4.42972300  | -1.73646700 |
| H  | 5.64716600  | 2.86375600  | -2.07019400 |
| C  | 2.91668300  | 4.25356700  | 0.30630000  |
| H  | 3.40151900  | 2.55829100  | 1.56725600  |
| C  | 3.20123700  | 4.92200100  | -0.88253200 |
| H  | 4.42347500  | 4.95535900  | -2.65844300 |
| H  | 2.15790100  | 4.64073900  | 0.98588400  |
| H  | 2.66410100  | 5.83297700  | -1.13781900 |
| S  | 0.53831200  | 1.18883700  | 3.56459500  |
| O  | -0.71580900 | 0.68427300  | 3.00945000  |
| O  | 0.74882200  | 1.14119900  | 5.00851200  |
| C  | 0.79275000  | 2.84714500  | 2.98581200  |
| H  | 0.79906000  | 2.83981100  | 1.89025200  |
| H  | -0.03844100 | 3.45312800  | 3.36038700  |
| H  | 1.74441300  | 3.21017800  | 3.38647700  |
| Cu | 0.52177000  | 0.30693800  | 0.17689600  |
| C  | -2.89985900 | -0.33832700 | -0.72977900 |
| C  | -4.16582000 | -0.59737100 | -1.60395400 |
| H  | -4.64967100 | 0.37154800  | -1.77151800 |
| H  | -3.81874500 | -0.95972400 | -2.57977800 |
| C  | -3.23001400 | 0.44106200  | 0.58682200  |
| H  | -4.15670700 | 0.02109600  | 0.99484500  |
| H  | -2.43035600 | 0.22785900  | 1.30615500  |
| C  | -2.28475100 | -1.66877100 | -0.38115400 |
| C  | -2.38282300 | -3.62727500 | 0.66650200  |
| C  | -1.19453200 | -3.58441800 | -0.30180800 |
| H  | -2.12787400 | -3.92815200 | 1.68543000  |
| H  | -3.20325200 | -4.25280800 | 0.29270500  |
| H  | -1.25861900 | -4.40509000 | -1.02465600 |
| C  | -1.94284000 | 0.52480200  | -1.50859100 |
| C  | -1.48684800 | 2.19450300  | -2.93037100 |
| C  | -0.21301400 | 1.77875100  | -2.18267500 |

|   |             |             |             |
|---|-------------|-------------|-------------|
| H | -1.40188700 | 2.14223000  | -4.01865300 |
| H | -1.85136500 | 3.18276000  | -2.63161700 |
| H | 0.18677100  | 2.62044300  | -1.59735900 |
| O | -2.84846300 | -2.26311700 | 0.69547400  |
| N | -1.38327700 | -2.30442200 | -1.02497700 |
| C | 0.14847400  | -3.65643100 | 0.38199000  |
| C | 1.13128500  | -4.53099400 | -0.08374700 |
| C | 0.41339900  | -2.88349600 | 1.51770500  |
| C | 2.34807400  | -4.65453800 | 0.58429400  |
| H | 0.92926100  | -5.13510900 | -0.96754700 |
| C | 1.62107300  | -3.01638900 | 2.19478100  |
| H | -0.33888000 | -2.18464800 | 1.88928400  |
| C | 2.58790400  | -3.90728300 | 1.73452900  |
| H | 3.10233100  | -5.34604000 | 0.21450200  |
| H | 1.80701800  | -2.42320700 | 3.08859700  |
| H | 3.52173800  | -4.02410400 | 2.28178900  |
| N | -0.71295100 | 0.75780300  | -1.23581800 |
| O | -2.47573700 | 1.22678600  | -2.51014300 |
| C | 0.88278000  | 1.20220700  | -3.03885100 |
| C | 2.16513000  | 1.74326800  | -2.99345100 |
| C | 0.62829200  | 0.10935900  | -3.87316200 |
| C | 3.18236000  | 1.21228000  | -3.78361700 |
| H | 2.36463000  | 2.59427100  | -2.34058400 |
| C | 1.64469300  | -0.42734100 | -4.65483700 |
| H | -0.37366700 | -0.31992600 | -3.91281100 |
| C | 2.92394700  | 0.12631900  | -4.61397400 |
| H | 4.17948100  | 1.64823600  | -3.74503000 |
| H | 1.43840000  | -1.27669100 | -5.30202300 |
| H | 3.71906200  | -0.29269700 | -5.22711300 |
| C | -5.16334300 | -1.57344300 | -1.04558400 |
| C | -5.05080700 | -2.92932100 | -1.34834400 |
| C | -6.21068300 | -1.13435100 | -0.23821300 |
| C | -5.95744300 | -3.84301100 | -0.81120000 |
| H | -4.25017500 | -3.29784900 | -1.98853700 |
| C | -7.12660600 | -2.05253900 | 0.27944200  |
| H | -6.34365500 | -0.07852000 | -0.00980300 |
| C | -7.00843400 | -3.41729700 | 0.00592500  |
| H | -7.71721300 | -4.12886900 | 0.41313400  |
| C | -3.34307100 | 1.93307200  | 0.42134800  |
| C | -2.21885900 | 2.72412200  | 0.66000800  |
| C | -4.53053200 | 2.53574100  | 0.01223900  |
| C | -2.27502400 | 4.10407100  | 0.47455700  |
| H | -1.28423600 | 2.27138700  | 0.98539600  |
| C | -4.58239000 | 3.92013800  | -0.16678800 |

|   |              |             |             |
|---|--------------|-------------|-------------|
| H | -5.43149900  | 1.95159900  | -0.16531700 |
| C | -3.45848500  | 4.72070700  | 0.05877000  |
| H | -3.50602500  | 5.79427900  | -0.08226100 |
| O | -8.11570800  | -1.52520800 | 1.04795500  |
| O | -5.74042500  | -5.14564300 | -1.13459500 |
| O | -5.78375400  | 4.41460400  | -0.56513400 |
| O | -1.11870600  | 4.77913400  | 0.71785800  |
| C | -6.63686300  | -6.13249800 | -0.62405500 |
| H | -6.63474700  | -6.09844800 | 0.47533200  |
| H | -7.65918300  | -5.91350500 | -0.96567900 |
| C | -6.16844800  | -7.47001500 | -1.12836300 |
| H | -5.15081300  | -7.68151800 | -0.78300500 |
| H | -6.82821100  | -8.26111800 | -0.75921100 |
| H | -6.17646700  | -7.49800400 | -2.22320000 |
| C | -9.09652700  | -2.40606400 | 1.59523700  |
| H | -8.60549000  | -3.14998800 | 2.23974400  |
| H | -9.60103900  | -2.94671500 | 0.78098700  |
| C | -10.06974500 | -1.56640200 | 2.37672300  |
| H | -10.55660100 | -0.83002500 | 1.72846300  |
| H | -10.84376700 | -2.20258300 | 2.81667700  |
| H | -9.56106400  | -1.03321600 | 3.18693600  |
| C | -1.16655300  | 6.20730500  | 0.73940900  |
| H | -1.44519100  | 6.58567900  | -0.25470500 |
| H | -1.93800100  | 6.53163100  | 1.45294300  |
| C | 0.19419000   | 6.70342200  | 1.14377800  |
| H | 0.94481800   | 6.45185300  | 0.38593200  |
| H | 0.17767700   | 7.79185100  | 1.25617500  |
| H | 0.49778900   | 6.26231500  | 2.10102300  |
| C | -5.90877900  | 5.82153500  | -0.77095400 |
| H | -5.18722700  | 6.14793800  | -1.53437400 |
| H | -5.67383600  | 6.35289500  | 0.16308800  |
| C | -7.32296000  | 6.08818400  | -1.20887100 |
| H | -8.03536000  | 5.76294700  | -0.44326000 |
| H | -7.46632600  | 7.15953800  | -1.37930300 |
| H | -7.54841300  | 5.55831000  | -2.14047100 |

B

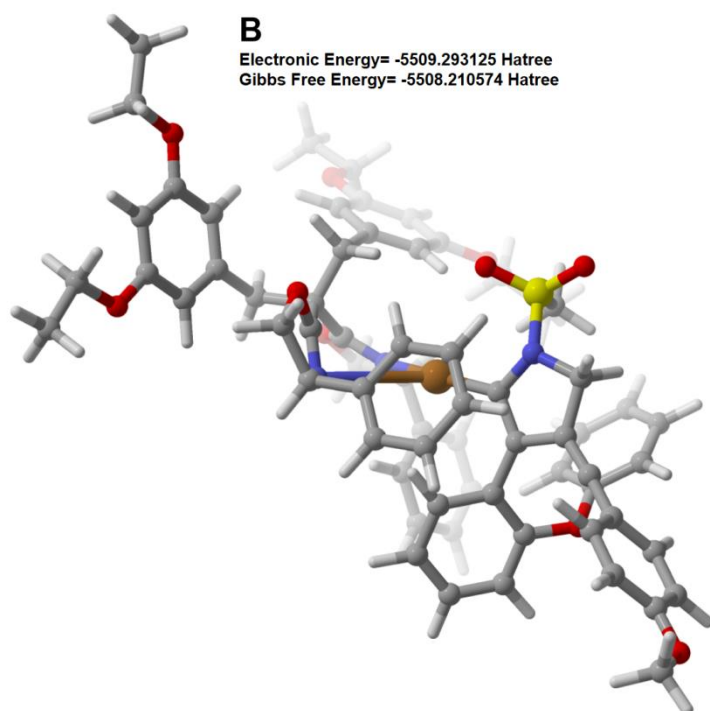

|   |              |             |             |
|---|--------------|-------------|-------------|
| N | -2.21285900  | 0.16488700  | -2.21967500 |
| C | -3.61507300  | -0.00363200 | -2.65153800 |
| H | -3.69688000  | -0.73222900 | -3.46361600 |
| H | -4.05750200  | 0.94861600  | -2.97869700 |
| C | -4.25454300  | -0.47136800 | -1.37077900 |
| C | -5.44158400  | -0.99721000 | -1.26095200 |
| C | -6.63805600  | -1.60230400 | -1.08443600 |
| C | -7.82188900  | -0.84870000 | -0.77752700 |
| C | -6.73935400  | -3.02942100 | -1.17912700 |
| C | -9.00887200  | -1.48441300 | -0.57825200 |
| H | -7.74654100  | 0.23249200  | -0.69822600 |
| C | -7.93023700  | -3.66895500 | -0.97781100 |
| H | -5.84067100  | -3.59571600 | -1.41272700 |
| C | -9.07654800  | -2.89796000 | -0.67219000 |
| H | -9.92066000  | -0.94462100 | -0.33972800 |
| H | -7.99103700  | -4.74963200 | -1.04816300 |
| O | -10.26824500 | -3.41594200 | -0.45298000 |
| C | -10.44801400 | -4.83718700 | -0.50843800 |
| H | -11.50147400 | -5.00766000 | -0.28856000 |
| H | -10.21027200 | -5.21386400 | -1.50788800 |
| H | -9.82533300  | -5.32975300 | 0.24453100  |
| C | -2.06571300  | 0.08739000  | -0.82602400 |
| C | -3.27295600  | -0.27526000 | -0.29250600 |
| C | -3.58328000  | -0.47178900 | 1.12742800  |

|    |             |             |             |
|----|-------------|-------------|-------------|
| C  | -2.79891700 | -1.29301500 | 1.94639500  |
| C  | -4.68273300 | 0.16730400  | 1.72471600  |
| C  | -3.12210400 | -1.50892900 | 3.28246100  |
| H  | -1.94119000 | -1.79473900 | 1.50027700  |
| C  | -5.01981600 | -0.04421200 | 3.05458100  |
| C  | -4.24588800 | -0.89935800 | 3.83372100  |
| H  | -2.50156200 | -2.16536600 | 3.88832500  |
| H  | -5.88632900 | 0.47059600  | 3.46269500  |
| H  | -4.51210300 | -1.07191100 | 4.87370100  |
| O  | -5.49963300 | 1.00296100  | 0.98048500  |
| C  | -4.94336500 | 2.13370300  | 0.41791500  |
| C  | -3.89569500 | 2.82687200  | 1.01920300  |
| C  | -5.51424900 | 2.59066200  | -0.76696300 |
| C  | -3.41785900 | 3.98473800  | 0.41238800  |
| H  | -3.46469400 | 2.47215900  | 1.95546200  |
| C  | -5.02434700 | 3.74936400  | -1.36188800 |
| H  | -6.33118600 | 2.02873900  | -1.21471400 |
| C  | -3.97259800 | 4.45206600  | -0.77700800 |
| H  | -2.60944200 | 4.53295600  | 0.89374900  |
| H  | -5.47090900 | 4.10288700  | -2.28835400 |
| H  | -3.58858300 | 5.35781500  | -1.24153100 |
| S  | -1.18631800 | 1.10573400  | -3.13318500 |
| O  | 0.17103400  | 0.58055900  | -2.97450700 |
| O  | -1.76757900 | 1.14372200  | -4.47479700 |
| C  | -1.27064500 | 2.72556100  | -2.41403500 |
| H  | -0.88839700 | 2.67120700  | -1.38751400 |
| H  | -0.65838700 | 3.39672800  | -3.02386800 |
| H  | -2.32134900 | 3.04065800  | -2.42122900 |
| Cu | -0.43006800 | 0.39085600  | 0.12102100  |
| C  | 3.14708500  | -0.30014100 | 0.52335700  |
| C  | 4.46735900  | -0.51446600 | 1.33233700  |
| H  | 5.03248900  | 0.42241900  | 1.28059900  |
| H  | 4.18323500  | -0.66342600 | 2.38170200  |
| C  | 3.42682000  | 0.20662800  | -0.94063200 |
| H  | 4.30240500  | -0.33614400 | -1.31373800 |
| H  | 2.56855600  | -0.08355500 | -1.56044800 |
| C  | 2.41727800  | -1.61355300 | 0.43229100  |
| C  | 2.36950300  | -3.73604600 | -0.21886900 |
| C  | 1.13265400  | -3.39655700 | 0.61315500  |
| H  | 2.15829200  | -4.23653900 | -1.16655100 |
| H  | 3.10963700  | -4.31482200 | 0.34944000  |
| H  | 1.02466300  | -4.08830900 | 1.45485800  |
| C  | 2.34462000  | 0.77635900  | 1.22145700  |
| C  | 2.20121900  | 2.64679100  | 2.44817000  |

|   |             |             |             |
|---|-------------|-------------|-------------|
| C | 0.88358600  | 2.38875600  | 1.71225600  |
| H | 2.11501000  | 2.48758400  | 3.52952200  |
| H | 2.63922400  | 3.62809700  | 2.24818800  |
| H | 0.76272700  | 3.09701800  | 0.87362300  |
| O | 2.94259000  | -2.44449100 | -0.50026500 |
| N | 1.44519000  | -2.04208400 | 1.14149500  |
| C | -0.14627500 | -3.40550900 | -0.18891600 |
| C | -1.28727500 | -4.03766400 | 0.30436700  |
| C | -0.19610500 | -2.81518000 | -1.45730400 |
| C | -2.45746800 | -4.08504500 | -0.45218700 |
| H | -1.25510700 | -4.50128500 | 1.29013200  |
| C | -1.35431800 | -2.88087200 | -2.22354100 |
| H | 0.68447000  | -2.31154200 | -1.85848100 |
| C | -2.48961500 | -3.51547700 | -1.72186500 |
| H | -3.33989100 | -4.58104600 | -0.05265600 |
| H | -1.37342600 | -2.42847500 | -3.21330800 |
| H | -3.39578500 | -3.56846300 | -2.32339000 |
| N | 1.09501500  | 1.05422300  | 1.11720100  |
| O | 3.08726600  | 1.63786200  | 1.92354300  |
| C | -0.30738400 | 2.50822500  | 2.61808000  |
| C | -0.87162700 | 3.77168100  | 2.80462200  |
| C | -0.79353300 | 1.42517900  | 3.35213800  |
| C | -1.91328000 | 3.95356700  | 3.70913700  |
| H | -0.48415700 | 4.61750600  | 2.23307400  |
| C | -1.83717700 | 1.60796100  | 4.25606900  |
| H | -0.35151400 | 0.43726200  | 3.21980500  |
| C | -2.39979000 | 2.86936100  | 4.43611400  |
| H | -2.34968100 | 4.94131500  | 3.84049300  |
| H | -2.21347900 | 0.75757500  | 4.82052900  |
| H | -3.21632200 | 3.00620300  | 5.14137800  |
| C | 5.34611700  | -1.65270600 | 0.89817000  |
| C | 5.20107100  | -2.90390300 | 1.49377500  |
| C | 6.31987500  | -1.46446200 | -0.08089000 |
| C | 5.99503100  | -3.97200600 | 1.07693500  |
| H | 4.45562200  | -3.07233200 | 2.27013600  |
| C | 7.12249900  | -2.53459900 | -0.48121300 |
| H | 6.48030800  | -0.48928600 | -0.53799900 |
| C | 6.96635700  | -3.80164300 | 0.08641300  |
| H | 7.58739500  | -4.63189200 | -0.22900600 |
| C | 3.61145000  | 1.69453300  | -1.03441300 |
| C | 2.48433000  | 2.47829200  | -1.27202300 |
| C | 4.83100600  | 2.31023900  | -0.76238400 |
| C | 2.55421700  | 3.86187500  | -1.14747500 |
| H | 1.52211500  | 2.01785700  | -1.48990400 |

|   |             |             |             |
|---|-------------|-------------|-------------|
| C | 4.90049300  | 3.70382500  | -0.67268100 |
| H | 5.73341000  | 1.72746900  | -0.58439000 |
| C | 3.75980200  | 4.49647900  | -0.84064500 |
| H | 3.80733000  | 5.57689100  | -0.75494600 |
| O | 8.04397000  | -2.25152400 | -1.43932600 |
| O | 5.75167700  | -5.16054700 | 1.69096100  |
| O | 6.13093200  | 4.21233900  | -0.40012900 |
| O | 1.37934700  | 4.52143000  | -1.33219600 |
| C | 6.53787700  | -6.29244800 | 1.31842300  |
| H | 6.41579300  | -6.48805400 | 0.24297000  |
| H | 7.60097600  | -6.07890700 | 1.50317700  |
| C | 6.06515400  | -7.45979500 | 2.14099900  |
| H | 5.00666400  | -7.66682200 | 1.95042000  |
| H | 6.64161300  | -8.35452900 | 1.88695900  |
| H | 6.19292100  | -7.26000800 | 3.21023000  |
| C | 8.90220500  | -3.29898400 | -1.89043200 |
| H | 8.29659100  | -4.12109400 | -2.29948100 |
| H | 9.47760100  | -3.69530300 | -1.04078700 |
| C | 9.80979800  | -2.71670400 | -2.93924000 |
| H | 10.41116500 | -1.90086200 | -2.52421200 |
| H | 10.48909400 | -3.48729200 | -3.31627900 |
| H | 9.23000900  | -2.32653000 | -3.78251900 |
| C | 1.20434100  | 5.79704300  | -0.71542200 |
| H | 1.60040600  | 5.75883500  | 0.31175300  |
| H | 1.76608100  | 6.56489300  | -1.26667700 |
| C | -0.27425600 | 6.07947400  | -0.72126400 |
| H | -0.80934500 | 5.29668600  | -0.16693600 |
| H | -0.48321000 | 7.04459100  | -0.24962100 |
| H | -0.66310600 | 6.10343500  | -1.74595200 |
| C | 6.27207400  | 5.62750400  | -0.27754200 |
| H | 5.61792900  | 5.99476700  | 0.52696300  |
| H | 5.95852100  | 6.11181100  | -1.21415300 |
| C | 7.71820400  | 5.91102100  | 0.02441700  |
| H | 8.36318800  | 5.54505600  | -0.78152400 |
| H | 7.87472600  | 6.98912100  | 0.12736700  |
| H | 8.02259000  | 5.42817300  | 0.95914400  |



TS<sub>B-C</sub>

TS<sub>B-C</sub>  
Electronic Energy= -5509.277219 Hartree  
Gibbs Free Energy= -5508.194192 Hartree

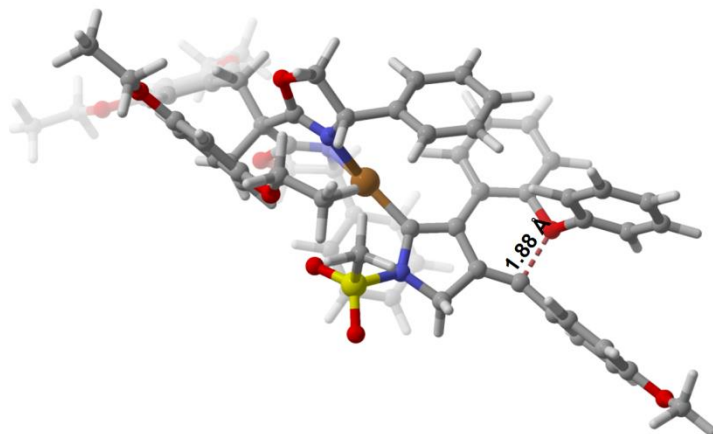

|   |             |             |             |
|---|-------------|-------------|-------------|
| N | 2.23199900  | -2.56187100 | -0.98755300 |
| C | 3.69924100  | -2.62651300 | -0.85657800 |
| H | 4.19176100  | -2.42626700 | -1.81588200 |
| H | 4.03493900  | -3.60415400 | -0.48718700 |
| C | 3.93598900  | -1.52313400 | 0.13892100  |
| C | 5.16528700  | -1.19785800 | 0.50580700  |
| C | 6.53191900  | -1.22773900 | 0.15282700  |
| C | 6.95158200  | -0.68309800 | -1.08424600 |
| C | 7.50346700  | -1.72003400 | 1.04303800  |
| C | 8.28610000  | -0.65431800 | -1.41614800 |
| H | 6.20067700  | -0.29180300 | -1.77040300 |
| C | 8.84811900  | -1.68184800 | 0.72478900  |
| H | 7.18280400  | -2.12296200 | 2.00129800  |
| C | 9.24224100  | -1.14657000 | -0.51069800 |
| H | 8.63000000  | -0.24927000 | -2.36417500 |
| H | 9.58171200  | -2.06516500 | 1.42649700  |
| O | 10.51882600 | -1.06265400 | -0.91766800 |
| C | 11.54063100 | -1.53668100 | -0.04704300 |
| H | 12.48351600 | -1.36831300 | -0.56907100 |
| H | 11.54264800 | -0.98043800 | 0.89737900  |
| H | 11.42164600 | -2.60761300 | 0.15386200  |
| C | 1.62388800  | -1.66323300 | -0.11244700 |
| C | 2.65112400  | -1.01017700 | 0.55435600  |
| C | 2.54857700  | 0.05482400  | 1.53907900  |
| C | 1.31976400  | 0.51784800  | 2.04349200  |
| C | 3.68627200  | 0.67180400  | 2.07480300  |
| C | 1.24458400  | 1.49789300  | 3.02196200  |

|    |             |             |             |
|----|-------------|-------------|-------------|
| H  | 0.40214600  | 0.07256200  | 1.66110200  |
| C  | 3.63756300  | 1.64507300  | 3.06189300  |
| C  | 2.40522200  | 2.06336000  | 3.54703200  |
| H  | 0.26757900  | 1.81725800  | 3.38150100  |
| H  | 4.56665900  | 2.06983000  | 3.43545600  |
| H  | 2.35583800  | 2.82335700  | 4.32197900  |
| O  | 4.98074700  | 0.31234200  | 1.60906300  |
| C  | 5.72530600  | 1.38045000  | 1.06388000  |
| C  | 6.99460800  | 1.60763400  | 1.56663300  |
| C  | 5.19843800  | 2.09824700  | 0.00248000  |
| C  | 7.77075600  | 2.59568600  | 0.96413400  |
| H  | 7.36235400  | 1.01252200  | 2.39867400  |
| C  | 5.97986500  | 3.08739800  | -0.58283800 |
| H  | 4.20121200  | 1.86290600  | -0.36382100 |
| C  | 7.26730200  | 3.33125200  | -0.10580600 |
| H  | 8.77349600  | 2.78922100  | 1.33610000  |
| H  | 5.58228500  | 3.65799600  | -1.41956800 |
| H  | 7.88068300  | 4.09867900  | -0.57074900 |
| S  | 1.42260500  | -3.79352700 | -1.76549100 |
| O  | 0.15663900  | -3.27756100 | -2.28499200 |
| O  | 2.38774600  | -4.36354600 | -2.70535900 |
| C  | 1.06514500  | -4.97163300 | -0.49664000 |
| H  | 0.42876900  | -4.47671500 | 0.24436100  |
| H  | 0.54363900  | -5.81734600 | -0.95338400 |
| H  | 2.00709700  | -5.29703900 | -0.04546200 |
| Cu | -0.26899600 | -1.24962700 | -0.20440500 |
| C  | -3.41603300 | 0.41475700  | -0.33079500 |
| C  | -3.72974900 | 1.37923300  | 0.88717600  |
| H  | -4.81887900 | 1.43319600  | 0.99479000  |
| H  | -3.33870700 | 0.91064300  | 1.79768400  |
| C  | -4.58399700 | 0.39343500  | -1.37171600 |
| H  | -4.77411000 | 1.43926700  | -1.63823800 |
| H  | -4.20530900 | -0.10811000 | -2.27206600 |
| C  | -2.19544800 | 0.93190700  | -1.05635300 |
| C  | -1.17378900 | 2.33650100  | -2.46587400 |
| C  | -0.14604900 | 1.59800400  | -1.60031300 |
| H  | -1.14121200 | 2.03229500  | -3.51863600 |
| H  | -1.11021300 | 3.42571900  | -2.39454900 |
| H  | 0.27660100  | 2.27492000  | -0.83786600 |
| C  | -3.21181500 | -0.95877300 | 0.25477100  |
| C  | -3.97165100 | -2.71380100 | 1.40493700  |
| C  | -2.53388600 | -2.96565500 | 0.93745900  |
| H  | -4.12913800 | -2.86017000 | 2.47597000  |
| H  | -4.70948900 | -3.29203000 | 0.83553800  |

|   |             |             |             |
|---|-------------|-------------|-------------|
| H | -2.47265400 | -3.88361500 | 0.34143400  |
| O | -2.44704100 | 1.92359100  | -1.92352000 |
| N | -0.97150000 | 0.61337200  | -0.87170200 |
| C | 0.98730100  | 0.97588700  | -2.36619100 |
| C | 2.29066200  | 1.43322200  | -2.17834100 |
| C | 0.75572100  | -0.07219500 | -3.26000300 |
| C | 3.35560200  | 0.83589700  | -2.84989200 |
| H | 2.46478800  | 2.27250900  | -1.50174300 |
| C | 1.81679500  | -0.67621900 | -3.92618000 |
| H | -0.26280800 | -0.42765500 | -3.41844000 |
| C | 3.12092800  | -0.22878000 | -3.71639800 |
| H | 4.36951400  | 1.20436200  | -2.69629100 |
| H | 1.62768400  | -1.50239600 | -4.60840100 |
| H | 3.95153500  | -0.70321100 | -4.23495300 |
| N | -2.26278800 | -1.80300300 | 0.05951100  |
| O | -4.18394700 | -1.31922300 | 1.10361500  |
| C | -1.52433000 | -3.04546500 | 2.05385400  |
| C | -0.92451800 | -4.26642700 | 2.36231500  |
| C | -1.18356200 | -1.91359400 | 2.80041500  |
| C | 0.02487300  | -4.35432200 | 3.37756200  |
| H | -1.19891500 | -5.15335000 | 1.79129500  |
| C | -0.24139100 | -2.00097300 | 3.82016600  |
| H | -1.64560600 | -0.94986100 | 2.57570500  |
| C | 0.37210800  | -3.21949200 | 4.10476900  |
| H | 0.49310800  | -5.31062900 | 3.59919100  |
| H | 0.02082200  | -1.11170600 | 4.38972100  |
| H | 1.11351500  | -3.28439700 | 4.89767700  |
| C | -3.11674000 | 2.74351500  | 0.76965600  |
| C | -3.79757100 | 3.81482200  | 0.20137700  |
| C | -1.78049300 | 2.88778600  | 1.13957600  |
| C | -3.11898200 | 5.01286500  | -0.04487800 |
| H | -4.84186700 | 3.72630000  | -0.09461000 |
| C | -1.10128600 | 4.06740200  | 0.85380500  |
| H | -1.23195700 | 2.05459700  | 1.57847700  |
| C | -1.75978000 | 5.14658200  | 0.25763300  |
| H | -1.22491300 | 6.06747500  | 0.05002600  |
| C | -5.86824000 | -0.26112700 | -0.95293300 |
| C | -6.88383200 | 0.48487000  | -0.35971900 |
| C | -6.05041100 | -1.62519800 | -1.17263100 |
| C | -8.06770900 | -0.14194700 | 0.03660100  |
| H | -6.78050300 | 1.55833500  | -0.20837200 |
| C | -7.22614100 | -2.24724200 | -0.75704100 |
| H | -5.26972400 | -2.22626100 | -1.63866600 |
| C | -8.25150100 | -1.51355900 | -0.15151000 |

|   |              |             |             |
|---|--------------|-------------|-------------|
| H | -9.16925400  | -1.99794800 | 0.16098300  |
| O | 0.21875900   | 4.08510500  | 1.18418800  |
| O | -3.86201500  | 6.00377800  | -0.60337400 |
| O | -7.29360100  | -3.58729600 | -0.97736900 |
| O | -9.00052700  | 0.66830800  | 0.60229100  |
| C | -3.22308000  | 7.24334800  | -0.90744800 |
| H | -2.80338700  | 7.67682000  | 0.01224500  |
| H | -2.39184600  | 7.06696200  | -1.60592600 |
| C | -4.26085900  | 8.14872800  | -1.51236400 |
| H | -5.08352400  | 8.32141800  | -0.81031500 |
| H | -3.81363600  | 9.11559300  | -1.76253100 |
| H | -4.67208300  | 7.71223000  | -2.42877600 |
| C | 1.10084100   | 4.90182700  | 0.41132900  |
| H | 0.97016000   | 5.96084600  | 0.67657400  |
| H | 0.85310100   | 4.78668100  | -0.65616800 |
| C | 2.50225000   | 4.43089100  | 0.69948600  |
| H | 2.59539500   | 3.35785800  | 0.48179000  |
| H | 3.22210100   | 4.97513700  | 0.07903200  |
| H | 2.76427000   | 4.58965600  | 1.75194700  |
| C | -10.23907900 | 0.09445100  | 1.01917800  |
| H | -10.73539600 | -0.37561900 | 0.15737200  |
| H | -10.04937100 | -0.68965900 | 1.76692100  |
| C | -11.07730800 | 1.20354000  | 1.59378700  |
| H | -11.26392000 | 1.97905300  | 0.84329800  |
| H | -12.04172600 | 0.80953700  | 1.92852600  |
| H | -10.57730500 | 1.66457500  | 2.45225800  |
| C | -8.47787500  | -4.28265100 | -0.58802500 |
| H | -9.34526100  | -3.85423100 | -1.11136800 |
| H | -8.64082900  | -4.15696400 | 0.49253500  |
| C | -8.28701500  | -5.73145600 | -0.94482700 |
| H | -7.42366000  | -6.15166200 | -0.41790300 |
| H | -9.17462200  | -6.30632700 | -0.66360000 |
| H | -8.12741300  | -5.84939500 | -2.02191500 |

C

C  
Electronic Energy= -5509.286594 Hartree  
Gibbs Free Energy= -5508.202043 Hartree

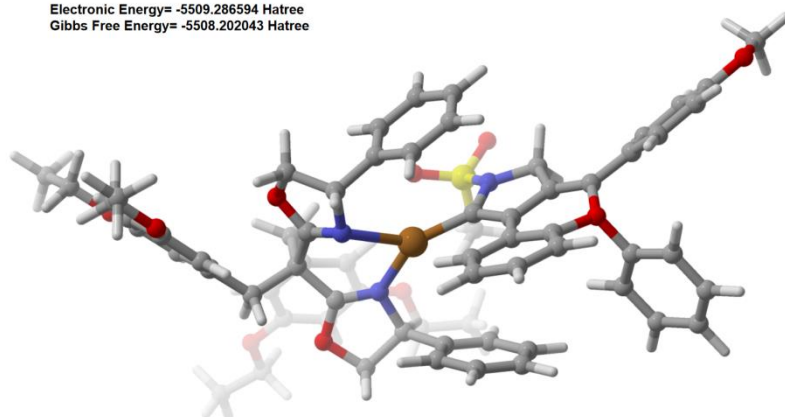

|   |              |             |             |
|---|--------------|-------------|-------------|
| N | -2.24928000  | 0.42181200  | -1.63799800 |
| C | -3.71024900  | 0.41869500  | -1.86767900 |
| H | -3.96889200  | -0.10351600 | -2.79781100 |
| H | -4.09292900  | 1.44710600  | -1.93262900 |
| C | -4.19046300  | -0.26665000 | -0.62940000 |
| C | -5.44602200  | -0.66923900 | -0.35789200 |
| C | -6.67678100  | -0.71721000 | -1.12277800 |
| C | -7.63507300  | -1.72532100 | -0.90965400 |
| C | -6.91856200  | 0.21795900  | -2.13627300 |
| C | -8.77831500  | -1.78953900 | -1.68207700 |
| H | -7.47129000  | -2.47400000 | -0.13783000 |
| C | -8.06017600  | 0.15130100  | -2.92776200 |
| H | -6.21714100  | 1.03068300  | -2.30753500 |
| C | -8.99809500  | -0.85583600 | -2.70144300 |
| H | -9.51832500  | -2.56985600 | -1.52127900 |
| H | -8.21062800  | 0.89615100  | -3.70312900 |
| O | -10.14701500 | -1.00991600 | -3.40965900 |
| C | -10.39927700 | -0.09002100 | -4.45904300 |
| H | -11.35036000 | -0.38604200 | -4.90553800 |
| H | -10.48311900 | 0.93650700  | -4.08018700 |
| H | -9.61337600  | -0.13086000 | -5.22410600 |
| C | -1.87251700  | -0.08503000 | -0.39275900 |
| C | -3.04570000  | -0.49587200 | 0.21707200  |
| C | -3.21098400  | -1.35509900 | 1.37034000  |
| C | -2.17399400  | -1.91028100 | 2.13853100  |
| C | -4.49192900  | -1.78991300 | 1.70797400  |
| C | -2.43600800  | -2.82339700 | 3.14964300  |
| H | -1.14848500  | -1.61215300 | 1.92050800  |
| C | -4.79464400  | -2.71678000 | 2.68432900  |

|    |             |             |             |
|----|-------------|-------------|-------------|
| C  | -3.73936500 | -3.24374800 | 3.42014100  |
| H  | -1.60874500 | -3.22551600 | 3.72976500  |
| H  | -5.82650200 | -3.00306300 | 2.87016900  |
| H  | -3.93679900 | -3.97106800 | 4.20199300  |
| O  | -5.63121800 | -1.17980700 | 1.03012400  |
| C  | -6.38916600 | -0.27176300 | 1.88067300  |
| C  | -5.85010000 | 0.96753900  | 2.16779100  |
| C  | -7.60219100 | -0.72639900 | 2.35673100  |
| C  | -6.58633100 | 1.80529500  | 2.99917300  |
| H  | -4.88436700 | 1.26790800  | 1.76671400  |
| C  | -8.32311200 | 0.13204400  | 3.18411600  |
| H  | -7.96490800 | -1.71605500 | 2.09398800  |
| C  | -7.81741100 | 1.38913000  | 3.50245900  |
| H  | -6.19105700 | 2.78591300  | 3.25231000  |
| H  | -9.28309900 | -0.18914800 | 3.57825800  |
| H  | -8.38653800 | 2.05099300  | 4.14970800  |
| S  | -1.26873200 | 1.41334500  | -2.55469800 |
| O  | 0.07089400  | 0.82742900  | -2.61690900 |
| O  | -1.99389700 | 1.64067500  | -3.80419500 |
| C  | -1.17027700 | 2.93238400  | -1.64752700 |
| H  | -0.71426400 | 2.71277400  | -0.67724500 |
| H  | -0.54698100 | 3.62543300  | -2.22165100 |
| H  | -2.18199600 | 3.33134500  | -1.52365800 |
| Cu | -0.04883400 | -0.11746600 | 0.23077100  |
| C  | 3.44803700  | -0.00114600 | 0.31267800  |
| C  | 4.72054700  | -0.27165300 | 1.17599900  |
| H  | 5.27010100  | 0.67591600  | 1.22149600  |
| H  | 4.37941100  | -0.49462900 | 2.19477900  |
| C  | 3.79217000  | 0.63924000  | -1.08437900 |
| H  | 4.70886800  | 0.16282200  | -1.45038400 |
| H  | 2.98191300  | 0.37623700  | -1.77788800 |
| C  | 2.71816200  | -1.29262300 | 0.03370000  |
| C  | 2.70300400  | -3.37593100 | -0.75894200 |
| C  | 1.37118600  | -3.06056400 | -0.06757700 |
| H  | 2.60629400  | -3.75299000 | -1.77989500 |
| H  | 3.32912600  | -4.06032400 | -0.17380800 |
| H  | 1.20106500  | -3.74673300 | 0.77006100  |
| C  | 2.58666300  | 0.97829300  | 1.07513500  |
| C  | 2.21742800  | 2.66401700  | 2.50062500  |
| C  | 0.94538000  | 2.35251300  | 1.70500100  |
| H  | 2.14459700  | 2.38784500  | 3.55876600  |
| H  | 2.54768000  | 3.70162100  | 2.41440500  |
| H  | 0.74350300  | 3.15533100  | 0.97600000  |
| O  | 3.37984300  | -2.10319700 | -0.80753200 |

|   |             |             |             |
|---|-------------|-------------|-------------|
| N | 1.59354200  | -1.70083600 | 0.49772500  |
| C | 0.15977700  | -3.09312100 | -0.96196100 |
| C | -1.02602700 | -3.67044200 | -0.50755500 |
| C | 0.18983200  | -2.51343600 | -2.23351800 |
| C | -2.17178400 | -3.65242300 | -1.29931400 |
| H | -1.05153300 | -4.12803300 | 0.48129600  |
| C | -0.94878600 | -2.50623300 | -3.03228000 |
| H | 1.10921100  | -2.05125100 | -2.59642600 |
| C | -2.13451800 | -3.07109500 | -2.56419100 |
| H | -3.09502100 | -4.09227800 | -0.92574300 |
| H | -0.91484300 | -2.04879100 | -4.01910100 |
| H | -3.02682200 | -3.06020200 | -3.18669100 |
| N | 1.32802700  | 1.14910600  | 0.94105400  |
| O | 3.22775400  | 1.82245000  | 1.89279500  |
| C | -0.30404600 | 2.09851300  | 2.50403600  |
| C | -1.47387700 | 2.80164100  | 2.21908400  |
| C | -0.33014100 | 1.09382000  | 3.47572200  |
| C | -2.65812900 | 2.50127700  | 2.88881900  |
| H | -1.45592700 | 3.58309700  | 1.45856200  |
| C | -1.51077500 | 0.79453700  | 4.14664100  |
| H | 0.57906300  | 0.53228400  | 3.69481900  |
| C | -2.68004700 | 1.49318600  | 3.84895300  |
| H | -3.56610500 | 3.05676200  | 2.65894300  |
| H | -1.52346800 | 0.00409200  | 4.89411300  |
| H | -3.60819500 | 1.25050300  | 4.36372100  |
| C | 5.64484500  | -1.36544300 | 0.72500700  |
| C | 5.46916100  | -2.65840000 | 1.21377500  |
| C | 6.68260900  | -1.09822700 | -0.16469400 |
| C | 6.29954000  | -3.68855700 | 0.77600000  |
| H | 4.66264900  | -2.88822200 | 1.90991300  |
| C | 7.52318700  | -2.13207600 | -0.58379500 |
| H | 6.86188000  | -0.09050300 | -0.53640900 |
| C | 7.33979800  | -3.43842200 | -0.12439100 |
| H | 7.99068900  | -4.23903900 | -0.45566300 |
| C | 3.91657000  | 2.13377700  | -1.02878600 |
| C | 2.76578700  | 2.89573800  | -1.22375500 |
| C | 5.10451100  | 2.75728800  | -0.65615900 |
| C | 2.78200900  | 4.26237000  | -0.96117800 |
| H | 1.82856800  | 2.42606300  | -1.52094000 |
| C | 5.12114200  | 4.13658800  | -0.43106100 |
| H | 6.02009800  | 2.18710700  | -0.50643000 |
| C | 3.95776800  | 4.90242000  | -0.55965800 |
| H | 3.96703400  | 5.96971800  | -0.36741000 |
| O | 8.50761300  | -1.77456000 | -1.45003400 |

|   |             |             |             |
|---|-------------|-------------|-------------|
| O | 6.02135600  | -4.92216900 | 1.27666600  |
| O | 6.32301100  | 4.65741900  | -0.06981000 |
| O | 1.59074900  | 4.89982100  | -1.11115600 |
| C | 6.83700400  | -6.02189000 | 0.87280200  |
| H | 6.79462300  | -6.13057200 | -0.22093200 |
| H | 7.88301000  | -5.82719100 | 1.15164800  |
| C | 6.30939700  | -7.25030300 | 1.56245900  |
| H | 5.26875900  | -7.43950200 | 1.27806600  |
| H | 6.90666100  | -8.12312500 | 1.28166200  |
| H | 6.35669800  | -7.13645300 | 2.65071900  |
| C | 9.40081600  | -2.78372300 | -1.91992400 |
| H | 8.82962100  | -3.57202800 | -2.43199200 |
| H | 9.91853700  | -3.24448800 | -1.06577200 |
| C | 10.37570400 | -2.12189900 | -2.85499900 |
| H | 10.94257300 | -1.34083700 | -2.33717800 |
| H | 11.08351600 | -2.86090200 | -3.24261100 |
| H | 9.85369600  | -1.66704600 | -3.70358700 |
| C | 1.40684200  | 6.16240000  | -0.47026600 |
| H | 1.78339500  | 6.10039800  | 0.56214300  |
| H | 1.98302700  | 6.93782600  | -0.99565000 |
| C | -0.06797400 | 6.45990600  | -0.49555100 |
| H | -0.62639900 | 5.68644300  | 0.04702600  |
| H | -0.26750000 | 7.42527800  | -0.02033300 |
| H | -0.44060600 | 6.50030700  | -1.52512300 |
| C | 6.40798700  | 6.05748300  | 0.19529300  |
| H | 5.71856400  | 6.32054200  | 1.01102200  |
| H | 6.10250700  | 6.62094600  | -0.69867500 |
| C | 7.83364200  | 6.35858500  | 0.56899000  |
| H | 8.51391000  | 6.09679700  | -0.24840800 |
| H | 7.94722800  | 7.42578300  | 0.78252200  |
| H | 8.12936700  | 5.79572600  | 1.46075700  |



# TS<sub>C-D</sub>

## TS<sub>C-D</sub>

Electronic Energy= -1718.581093 Hartree  
 Gibbs Free Energy= -1718.248569 Hartree

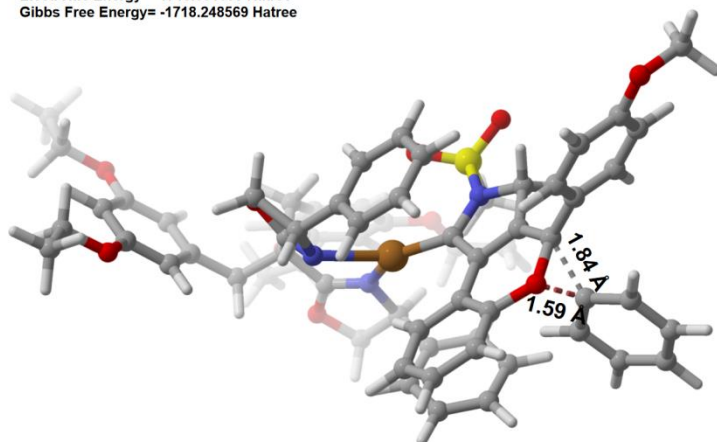

|   |              |             |             |
|---|--------------|-------------|-------------|
| N | -2.32994500  | 0.72303300  | -1.43006000 |
| C | -3.77798200  | 0.59181100  | -1.66439300 |
| H | -3.98535000  | -0.06167400 | -2.52311500 |
| H | -4.24195000  | 1.56885400  | -1.85745400 |
| C | -4.20183700  | 0.00435300  | -0.36761000 |
| C | -5.49656000  | -0.38501000 | -0.03940900 |
| C | -6.44205300  | -0.97063600 | -0.99934700 |
| C | -6.73321700  | -2.34150200 | -1.00171700 |
| C | -7.05502300  | -0.14433700 | -1.94050700 |
| C | -7.60485100  | -2.86686400 | -1.93843100 |
| H | -6.27230000  | -2.99473300 | -0.26270800 |
| C | -7.92034000  | -0.66724800 | -2.89828100 |
| H | -6.85460600  | 0.92632300  | -1.92478400 |
| C | -8.19860600  | -2.03398200 | -2.89499900 |
| H | -7.83993400  | -3.92841200 | -1.95421100 |
| H | -8.37839000  | -0.00246600 | -3.62415400 |
| O | -9.03480500  | -2.64742800 | -3.77348200 |
| C | -9.66295700  | -1.83940300 | -4.75471900 |
| H | -10.28197100 | -2.50944900 | -5.35429900 |
| H | -10.30129600 | -1.07426000 | -4.29469100 |
| H | -8.92493000  | -1.35245200 | -5.40493400 |
| C | -1.91735200  | 0.30406300  | -0.19465500 |
| C | -3.09306400  | -0.09619800 | 0.47618200  |
| C | -3.21619100  | -0.78100800 | 1.75821000  |
| C | -2.16397800  | -1.05495000 | 2.63363800  |
| C | -4.46904300  | -1.26931200 | 2.13082200  |
| C | -2.37245800  | -1.78716600 | 3.80000700  |

|    |             |             |             |
|----|-------------|-------------|-------------|
| H  | -1.16919400 | -0.68036700 | 2.39346400  |
| C  | -4.70844100 | -2.01711000 | 3.26316900  |
| C  | -3.63458600 | -2.28020000 | 4.11371200  |
| H  | -1.53523800 | -1.97398200 | 4.46826300  |
| H  | -5.71470700 | -2.36619700 | 3.47737400  |
| H  | -3.79567500 | -2.85191100 | 5.02310700  |
| O  | -5.62145600 | -0.99410400 | 1.32777400  |
| C  | -6.27687600 | 0.45095700  | 1.39605800  |
| C  | -5.57059200 | 1.45286800  | 2.08051000  |
| C  | -7.68188000 | 0.40721200  | 1.41253200  |
| C  | -6.29698100 | 2.49131600  | 2.64942500  |
| H  | -4.48361400 | 1.46418600  | 2.11822100  |
| C  | -8.36665000 | 1.46481900  | 1.99188300  |
| H  | -8.20745000 | -0.42382900 | 0.95052500  |
| C  | -7.69003400 | 2.51724600  | 2.60981700  |
| H  | -5.74863500 | 3.29072500  | 3.14525400  |
| H  | -9.45427900 | 1.44956500  | 1.97419000  |
| H  | -8.24019200 | 3.33190300  | 3.07175800  |
| S  | -1.31299000 | 1.44557000  | -2.56645200 |
| O  | -0.06287300 | 0.69133500  | -2.63099000 |
| O  | -2.12488200 | 1.57752100  | -3.77269500 |
| C  | -0.97552100 | 3.04065200  | -1.88052200 |
| H  | -0.46294800 | 2.89209800  | -0.92459200 |
| H  | -0.33064300 | 3.57003000  | -2.58933200 |
| H  | -1.92397000 | 3.56890300  | -1.74515300 |
| Cu | -0.08866400 | 0.20694100  | 0.36762600  |
| C  | 3.33671400  | -0.09797200 | 0.32294800  |
| C  | 4.59271200  | -0.46182300 | 1.17614100  |
| H  | 5.24793900  | 0.41649700  | 1.15048000  |
| H  | 4.25394200  | -0.57927000 | 2.21376800  |
| C  | 3.70539700  | 0.35433000  | -1.14077700 |
| H  | 4.55282500  | -0.25614500 | -1.47320600 |
| H  | 2.85016600  | 0.11200800  | -1.78576800 |
| C  | 2.43070000  | -1.30115200 | 0.19728000  |
| C  | 2.09586000  | -3.41829500 | -0.43303200 |
| C  | 0.89661600  | -2.90759700 | 0.38267700  |
| H  | 1.83478400  | -3.78686100 | -1.42855900 |
| H  | 2.67823500  | -4.17980800 | 0.09780500  |
| H  | 0.80025200  | -3.47826400 | 1.31415800  |
| C  | 2.65104200  | 1.06172400  | 1.00555700  |
| C  | 2.58089000  | 2.96439600  | 2.18818600  |
| C  | 1.22255800  | 2.70066900  | 1.52585800  |
| H  | 2.55890800  | 2.90128500  | 3.28124300  |
| H  | 3.03299100  | 3.91192900  | 1.88379200  |

|   |             |             |             |
|---|-------------|-------------|-------------|
| H | 1.04737900  | 3.42849600  | 0.71669100  |
| O | 2.93856500  | -2.25844900 | -0.59005900 |
| N | 1.29389600  | -1.52156400 | 0.75360600  |
| C | -0.42512500 | -2.96110300 | -0.33741000 |
| C | -1.53643300 | -3.54019600 | 0.27590800  |
| C | -0.56104800 | -2.42276600 | -1.62008100 |
| C | -2.76938400 | -3.56855600 | -0.37277200 |
| H | -1.43402800 | -3.96624600 | 1.27403000  |
| C | -1.79015500 | -2.44724300 | -2.27024200 |
| H | 0.30281200  | -1.96520200 | -2.10472300 |
| C | -2.89932500 | -3.01779100 | -1.64537600 |
| H | -3.62963200 | -4.01915400 | 0.11959000  |
| H | -1.88593400 | -2.01349000 | -3.26455600 |
| H | -3.86443500 | -3.03254800 | -2.15054700 |
| N | 1.42033100  | 1.38284100  | 0.89243200  |
| O | 3.43110200  | 1.89625400  | 1.69964700  |
| C | 0.00725700  | 2.66454200  | 2.41439500  |
| C | -1.16761000 | 3.29268300  | 2.00032000  |
| C | -0.00388000 | 1.90398200  | 3.58687600  |
| C | -2.34230400 | 3.15300200  | 2.73585200  |
| H | -1.16280200 | 3.88661300  | 1.08582800  |
| C | -1.17309700 | 1.77263100  | 4.32906800  |
| H | 0.90370900  | 1.39372400  | 3.91135300  |
| C | -2.34794600 | 2.38923300  | 3.90029700  |
| H | -3.25390600 | 3.64338800  | 2.39839500  |
| H | -1.17235300 | 1.17397300  | 5.23745000  |
| H | -3.26766700 | 2.27297700  | 4.47112800  |
| C | 5.37502500  | -1.67963800 | 0.77685000  |
| C | 5.06011600  | -2.91662700 | 1.33589600  |
| C | 6.42347900  | -1.58032000 | -0.13472700 |
| C | 5.76165800  | -4.05640100 | 0.94750400  |
| H | 4.24340800  | -3.01555300 | 2.05115100  |
| C | 7.13580500  | -2.72378300 | -0.50355600 |
| H | 6.71015300  | -0.62066500 | -0.56210400 |
| C | 6.81142300  | -3.97429700 | 0.02693000  |
| H | 7.36375900  | -4.85968900 | -0.26572900 |
| C | 3.99041600  | 1.82374400  | -1.25532900 |
| C | 2.92226200  | 2.67768600  | -1.52438800 |
| C | 5.24624900  | 2.35466400  | -0.97326600 |
| C | 3.08939100  | 4.05633100  | -1.43219000 |
| H | 1.93422600  | 2.27949100  | -1.75249300 |
| C | 5.41341800  | 3.74114200  | -0.91339800 |
| H | 6.09970100  | 1.71078200  | -0.76638000 |
| C | 4.33541200  | 4.60813400  | -1.12227900 |

|   |             |             |             |
|---|-------------|-------------|-------------|
| H | 4.46286100  | 5.68348000  | -1.06235400 |
| O | 8.14304800  | -2.52664700 | -1.39448300 |
| O | 5.35288000  | -5.22256500 | 1.51543100  |
| O | 6.67130100  | 4.16840700  | -0.62838800 |
| O | 1.97096900  | 4.79630000  | -1.65220600 |
| C | 6.03436500  | -6.42651800 | 1.16344100  |
| H | 5.96331900  | -6.58623900 | 0.07751400  |
| H | 7.09979900  | -6.33569600 | 1.42124600  |
| C | 5.38381200  | -7.55034900 | 1.92268900  |
| H | 4.32434400  | -7.63641800 | 1.65860200  |
| H | 5.87598200  | -8.49793200 | 1.68336400  |
| H | 5.46020900  | -7.38597800 | 3.00280000  |
| C | 8.90724800  | -3.65487200 | -1.81855500 |
| H | 8.24205500  | -4.39567500 | -2.28628800 |
| H | 9.37880200  | -4.12999200 | -0.94565200 |
| C | 9.93984700  | -3.15809300 | -2.79322600 |
| H | 10.59952300 | -2.42269800 | -2.32042600 |
| H | 10.55288000 | -3.99254300 | -3.14720500 |
| H | 9.46271400  | -2.68931200 | -3.66047400 |
| C | 1.93752200  | 6.14197800  | -1.17620000 |
| H | 2.31097400  | 6.16722900  | -0.14094600 |
| H | 2.59528200  | 6.77451200  | -1.78981100 |
| C | 0.50663800  | 6.60120500  | -1.25303300 |
| H | -0.13521800 | 5.97239600  | -0.62350100 |
| H | 0.42169300  | 7.63565300  | -0.90640400 |
| H | 0.13680200  | 6.55213000  | -2.28322000 |
| C | 6.90698700  | 5.57229800  | -0.52254900 |
| H | 6.26253400  | 5.99567900  | 0.26196700  |
| H | 6.64727900  | 6.06238800  | -1.47246300 |
| C | 8.36234200  | 5.76101100  | -0.19239900 |
| H | 8.99789600  | 5.33941900  | -0.97838900 |
| H | 8.58991900  | 6.82747000  | -0.10130600 |
| H | 8.61282100  | 5.27328300  | 0.75568000  |

D

D

Electronic Energy= -1718.581093 Hartree  
Gibbs Free Energy= -1718.248569 Hartree

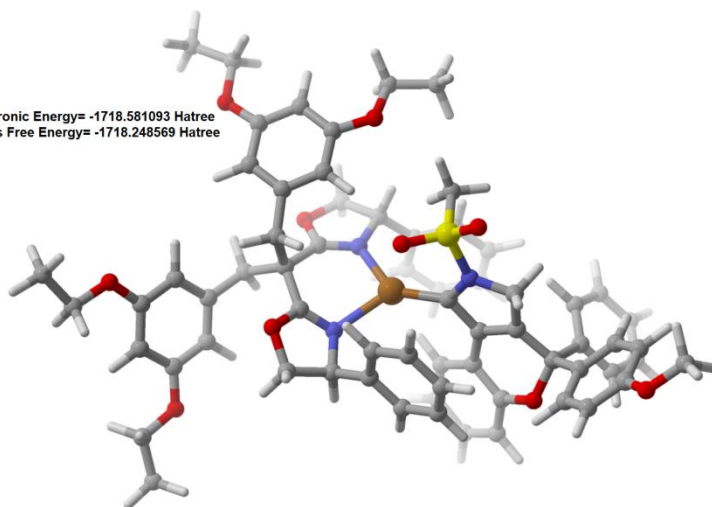

|   |              |             |             |
|---|--------------|-------------|-------------|
| N | -2.48434200  | 0.77380700  | -1.27675400 |
| C | -3.94641600  | 0.62902200  | -1.39671300 |
| H | -4.21048300  | 0.09757500  | -2.32198500 |
| H | -4.44221900  | 1.61147200  | -1.41630600 |
| C | -4.22527100  | -0.15114900 | -0.17630400 |
| C | -5.53794000  | -0.68479100 | 0.31748800  |
| C | -6.44114400  | -0.99935900 | -0.86112300 |
| C | -6.30608900  | -2.20747500 | -1.55356100 |
| C | -7.31614500  | -0.03783700 | -1.35907700 |
| C | -7.04846000  | -2.45276700 | -2.69606100 |
| H | -5.61447600  | -2.96524900 | -1.19182600 |
| C | -8.06406200  | -0.26797800 | -2.51154800 |
| H | -7.42222900  | 0.91667000  | -0.84573100 |
| C | -7.93279000  | -1.48378800 | -3.18192100 |
| H | -6.95751300  | -3.39363000 | -3.23391400 |
| H | -8.74119100  | 0.50135700  | -2.86979500 |
| O | -8.61654500  | -1.81543300 | -4.30859500 |
| C | -9.51979700  | -0.85669100 | -4.83352000 |
| H | -9.96278300  | -1.30681700 | -5.72390300 |
| H | -10.31548900 | -0.62056900 | -4.11546800 |
| H | -9.00179900  | 0.06838400  | -5.11729600 |
| C | -1.94677200  | 0.19874800  | -0.18944900 |
| C | -3.07967700  | -0.37573200 | 0.51096900  |
| C | -3.09478400  | -1.19082900 | 1.71033400  |
| C | -2.05702300  | -1.28588300 | 2.63758400  |
| C | -4.24062500  | -1.98425200 | 1.88272300  |
| C | -2.14465400  | -2.17466000 | 3.70274700  |
| H | -1.18367700  | -0.64192200 | 2.52059100  |

|    |             |             |             |
|----|-------------|-------------|-------------|
| C  | -4.32606400 | -2.89067300 | 2.93168300  |
| C  | -3.27266700 | -2.98421000 | 3.83730700  |
| H  | -1.33643900 | -2.23538300 | 4.42766400  |
| H  | -5.21705800 | -3.50608100 | 3.02819700  |
| H  | -3.34330000 | -3.68520700 | 4.66547300  |
| O  | -5.26361800 | -1.95078600 | 0.97198900  |
| C  | -6.18704600 | 0.24022400  | 1.34154200  |
| C  | -5.66703700 | 1.49022700  | 1.66994800  |
| C  | -7.33385600 | -0.21838300 | 1.99725800  |
| C  | -6.28553700 | 2.27394800  | 2.64384200  |
| H  | -4.76990900 | 1.86422400  | 1.17660400  |
| C  | -7.94715900 | 0.56106500  | 2.96833900  |
| H  | -7.73998500 | -1.19592100 | 1.74211700  |
| C  | -7.42312400 | 1.81173400  | 3.29451600  |
| H  | -5.86939400 | 3.24814000  | 2.89288500  |
| H  | -8.83665200 | 0.19324000  | 3.47427700  |
| H  | -7.90276600 | 2.42212200  | 4.05592700  |
| S  | -1.57168100 | 1.63542000  | -2.45150300 |
| O  | -0.31555000 | 0.92542000  | -2.65769900 |
| O  | -2.49018400 | 1.82117000  | -3.56681100 |
| C  | -1.24822600 | 3.17340400  | -1.64712300 |
| H  | -0.62792700 | 2.96744000  | -0.76934800 |
| H  | -0.70992800 | 3.80016500  | -2.36539100 |
| H  | -2.20289700 | 3.62982300  | -1.36899900 |
| Cu | -0.11870100 | 0.10399400  | 0.34724400  |
| C  | 3.30135000  | -0.02622300 | 0.29568500  |
| C  | 4.58651300  | -0.35314900 | 1.12026900  |
| H  | 5.21193700  | 0.54641000  | 1.08351300  |
| H  | 4.27546500  | -0.48484500 | 2.16438400  |
| C  | 3.62917000  | 0.49282200  | -1.15728000 |
| H  | 4.49352700  | -0.07291000 | -1.52351700 |
| H  | 2.77317400  | 0.24219800  | -1.79865000 |
| C  | 2.44927400  | -1.26256000 | 0.12702600  |
| C  | 2.20492900  | -3.38064200 | -0.53192500 |
| C  | 0.93373100  | -2.89939400 | 0.18255000  |
| H  | 2.03394100  | -3.78477900 | -1.53263400 |
| H  | 2.77787900  | -4.10134800 | 0.06301600  |
| H  | 0.74587700  | -3.50174600 | 1.07902900  |
| C  | 2.56888800  | 1.07558700  | 1.02673000  |
| C  | 2.42771000  | 2.92506400  | 2.28622000  |
| C  | 1.06864600  | 2.61467800  | 1.64480500  |
| H  | 2.43449400  | 2.83036900  | 3.37695100  |
| H  | 2.82629000  | 3.90240900  | 2.00156200  |
| H  | 0.82540500  | 3.37257500  | 0.88243400  |

|   |             |             |             |
|---|-------------|-------------|-------------|
| O | 3.00964400  | -2.18905200 | -0.65877000 |
| N | 1.29570000  | -1.52661900 | 0.62940300  |
| C | -0.31137500 | -2.90856200 | -0.66496400 |
| C | -1.49213500 | -3.46957000 | -0.17715600 |
| C | -0.30451400 | -2.34346000 | -1.94366200 |
| C | -2.64842200 | -3.46882100 | -0.95421000 |
| H | -1.50572300 | -3.90880500 | 0.82105200  |
| C | -1.45993000 | -2.33377500 | -2.71808000 |
| H | 0.61379900  | -1.89816900 | -2.33087200 |
| C | -2.63554400 | -2.89927000 | -2.22467600 |
| H | -3.56142300 | -3.91740900 | -0.56477500 |
| H | -1.44461600 | -1.88298200 | -3.70853300 |
| H | -3.54043700 | -2.89569000 | -2.83056600 |
| N | 1.32353700  | 1.34498900  | 0.93878900  |
| O | 3.31798100  | 1.91442200  | 1.74863200  |
| C | -0.11411600 | 2.45997500  | 2.56412100  |
| C | -1.34119800 | 3.02034000  | 2.20673000  |
| C | -0.03522000 | 1.66814200  | 3.71241200  |
| C | -2.47668900 | 2.78880300  | 2.97934800  |
| H | -1.40460800 | 3.64306700  | 1.31385400  |
| C | -1.16734500 | 1.44188600  | 4.48947200  |
| H | 0.91477600  | 1.21018600  | 3.99063800  |
| C | -2.39265800 | 1.99470400  | 4.11990200  |
| H | -3.42650900 | 3.23712200  | 2.69359100  |
| H | -1.09715800 | 0.81876000  | 5.37852600  |
| H | -3.28122700 | 1.80878800  | 4.71998500  |
| C | 5.39637100  | -1.54655800 | 0.70306400  |
| C | 5.13279800  | -2.78858100 | 1.27702100  |
| C | 6.41165000  | -1.42293900 | -0.24221800 |
| C | 5.84849300  | -3.91188600 | 0.86785800  |
| H | 4.33956200  | -2.90570100 | 2.01537400  |
| C | 7.13998700  | -2.54979300 | -0.63132400 |
| H | 6.65808700  | -0.45777500 | -0.68248000 |
| C | 6.86498900  | -3.80642500 | -0.08692500 |
| H | 7.42859400  | -4.67951800 | -0.39477200 |
| C | 3.85856400  | 1.97498700  | -1.21353800 |
| C | 2.75435200  | 2.80299700  | -1.40850500 |
| C | 5.10281800  | 2.53545600  | -0.93694300 |
| C | 2.87389700  | 4.17875200  | -1.23580300 |
| H | 1.77285300  | 2.38604800  | -1.63146900 |
| C | 5.22305800  | 3.92209100  | -0.80594700 |
| H | 5.98326400  | 1.91189600  | -0.78880000 |
| C | 4.10870500  | 4.75851300  | -0.93204500 |
| H | 4.19878000  | 5.83235000  | -0.80993700 |

|   |             |             |             |
|---|-------------|-------------|-------------|
| O | 8.11130500  | -2.33144200 | -1.55662500 |
| O | 5.48580600  | -5.08627800 | 1.44994100  |
| O | 6.47357000  | 4.37848800  | -0.53458000 |
| O | 1.71999600  | 4.88439800  | -1.36756700 |
| C | 6.17197800  | -6.27751100 | 1.06550900  |
| H | 6.06585900  | -6.43012400 | -0.01858300 |
| H | 7.24424800  | -6.17353500 | 1.28748500  |
| C | 5.56355700  | -7.41607700 | 1.83774400  |
| H | 4.49715000  | -7.51569600 | 1.60866500  |
| H | 6.06092300  | -8.35475600 | 1.57517700  |
| H | 5.67380500  | -7.25811700 | 2.91589300  |
| C | 8.88383200  | -3.44350500 | -2.00774900 |
| H | 8.21760200  | -4.20056000 | -2.44711400 |
| H | 9.39989700  | -3.90502800 | -1.15302600 |
| C | 9.86600900  | -2.92691100 | -3.02327400 |
| H | 10.52752100 | -2.17597800 | -2.57831200 |
| H | 10.48282400 | -3.74883600 | -3.39934500 |
| H | 9.34496400  | -2.47126100 | -3.87202900 |
| C | 1.65728600  | 6.20024100  | -0.81685100 |
| H | 2.08041100  | 6.18722600  | 0.19927800  |
| H | 2.25907100  | 6.89067600  | -1.42551300 |
| C | 0.20759300  | 6.60349500  | -0.79868100 |
| H | -0.37658800 | 5.91975100  | -0.16974500 |
| H | 0.10185200  | 7.61544800  | -0.39581000 |
| H | -0.21328100 | 6.59114600  | -1.81029300 |
| C | 6.66430000  | 5.78154200  | -0.35331300 |
| H | 6.03199600  | 6.13500200  | 0.47446800  |
| H | 6.35730100  | 6.31640000  | -1.26419900 |
| C | 8.12257300  | 6.00258100  | -0.05759300 |
| H | 8.74563500  | 5.65150800  | -0.88706200 |
| H | 8.31688500  | 7.06914300  | 0.09093200  |
| H | 8.42068200  | 5.46848300  | 0.85091300  |



TS<sub>D</sub>

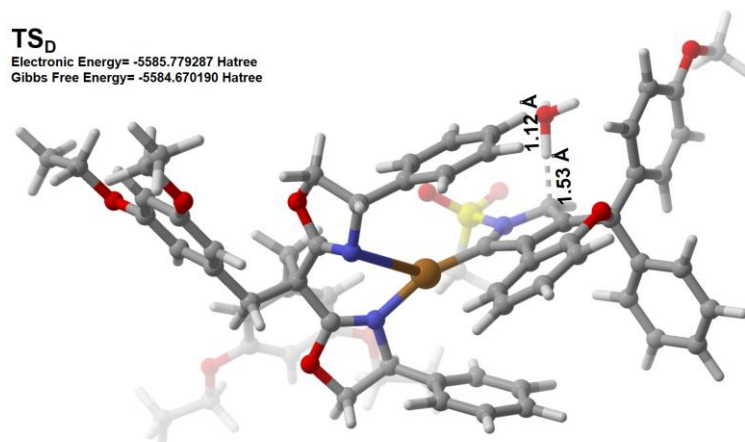

|   |              |             |             |
|---|--------------|-------------|-------------|
| N | -2.62657800  | 0.83289100  | -1.36209400 |
| C | -4.00533300  | 0.47130000  | -1.46230100 |
| H | -4.11785800  | -0.65075100 | -2.49968800 |
| H | -4.68318200  | 1.13048300  | -2.00421400 |
| C | -4.25302500  | -0.15715000 | -0.23707100 |
| C | -5.52850800  | -0.68848900 | 0.35023900  |
| C | -6.45486900  | -1.16220000 | -0.75399600 |
| C | -6.39645300  | -2.47667600 | -1.23096800 |
| C | -7.27226100  | -0.25024300 | -1.41692000 |
| C | -7.13580100  | -2.86016000 | -2.34196900 |
| H | -5.75947100  | -3.20732500 | -0.73764200 |
| C | -8.01769200  | -0.61849700 | -2.53396800 |
| H | -7.32603300  | 0.77968100  | -1.06626500 |
| C | -7.95176500  | -1.93146800 | -3.00097400 |
| H | -7.10398900  | -3.88266100 | -2.71084400 |
| H | -8.64369700  | 0.12056200  | -3.02429100 |
| O | -8.63877000  | -2.40030500 | -4.07293200 |
| C | -9.46501000  | -1.48537800 | -4.77507700 |
| H | -9.91791000  | -2.04720500 | -5.59393900 |
| H | -10.25782100 | -1.08628300 | -4.12992400 |
| H | -8.87968500  | -0.65410700 | -5.18812100 |
| C | -2.01452200  | 0.35777900  | -0.22952700 |
| C | -3.06161400  | -0.24336300 | 0.48960100  |
| C | -3.05219100  | -0.94274800 | 1.76360400  |
| C | -2.01584100  | -0.90738900 | 2.69798200  |
| C | -4.17081900  | -1.74517900 | 2.03786700  |
| C | -2.07390000  | -1.67494600 | 3.85597400  |
| H | -1.15742900  | -0.26039800 | 2.50639700  |

|    |             |             |             |
|----|-------------|-------------|-------------|
| C  | -4.23905700 | -2.51618200 | 3.19164600  |
| C  | -3.18130500 | -2.48774000 | 4.09655800  |
| H  | -1.25743700 | -1.63318500 | 4.57403100  |
| H  | -5.11908400 | -3.13235400 | 3.36224100  |
| H  | -3.23247300 | -3.08944600 | 5.00080800  |
| O  | -5.19828500 | -1.85974600 | 1.13324500  |
| C  | -6.18591300 | 0.33031200  | 1.27873200  |
| C  | -5.76941300 | 1.65837700  | 1.35451000  |
| C  | -7.23519600 | -0.10473900 | 2.09377000  |
| C  | -6.39353300 | 2.54105000  | 2.23529700  |
| H  | -4.95220800 | 2.01416000  | 0.72754700  |
| C  | -7.85315500 | 0.77374800  | 2.97391000  |
| H  | -7.55992900 | -1.14264800 | 2.03659400  |
| C  | -7.43262100 | 2.10119600  | 3.04712700  |
| H  | -6.06202500 | 3.57599200  | 2.28428800  |
| H  | -8.66581900 | 0.42317700  | 3.60589100  |
| H  | -7.91615800 | 2.78930300  | 3.73648100  |
| S  | -1.76265700 | 1.54898700  | -2.63940300 |
| O  | -0.61940600 | 0.69987100  | -2.97051000 |
| O  | -2.75379200 | 1.82762400  | -3.67430200 |
| C  | -1.17586900 | 3.04512500  | -1.90206000 |
| H  | -0.57107900 | 2.77039000  | -1.02809400 |
| H  | -0.56552800 | 3.55688700  | -2.65236100 |
| H  | -2.03937900 | 3.65165600  | -1.61481400 |
| Cu | -0.18706900 | 0.54705100  | 0.29624100  |
| C  | 3.42648700  | -0.09634700 | 0.45942400  |
| C  | 4.80301200  | -0.29828600 | 1.16567600  |
| H  | 5.35921900  | 0.64064700  | 1.06672900  |
| H  | 4.59974700  | -0.44301000 | 2.23430700  |
| C  | 3.58048400  | 0.39642600  | -1.02528500 |
| H  | 4.40816700  | -0.16339400 | -1.47489200 |
| H  | 2.66414100  | 0.11829600  | -1.56322300 |
| C  | 2.68788500  | -1.40937200 | 0.44263400  |
| C  | 2.52942100  | -3.52282700 | -0.22160500 |
| C  | 1.40956900  | -3.17774300 | 0.76212900  |
| H  | 2.19447900  | -4.00125000 | -1.14485100 |
| H  | 3.32064400  | -4.12632500 | 0.24245900  |
| H  | 1.40158900  | -3.87784800 | 1.60389800  |
| C  | 2.66448800  | 0.98004300  | 1.19831100  |
| C  | 2.53538200  | 2.85166500  | 2.43232700  |
| C  | 1.19455900  | 2.57660400  | 1.75198300  |
| H  | 2.51416900  | 2.72664500  | 3.52009700  |
| H  | 2.95537100  | 3.82966400  | 2.18588800  |
| H  | 1.03408400  | 3.29052100  | 0.92702300  |

|   |             |             |             |
|---|-------------|-------------|-------------|
| O | 3.09242200  | -2.23746400 | -0.55006900 |
| N | 1.80119200  | -1.83322000 | 1.25822400  |
| C | 0.03647900  | -3.16292100 | 0.13423700  |
| C | -1.03193800 | -3.81096700 | 0.75444800  |
| C | -0.17968400 | -2.52970100 | -1.09595300 |
| C | -2.29087800 | -3.83878100 | 0.15613300  |
| H | -0.87162300 | -4.30578100 | 1.71233300  |
| C | -1.43190600 | -2.56541100 | -1.69965800 |
| H | 0.64022500  | -2.00905300 | -1.59386800 |
| C | -2.49102200 | -3.22183000 | -1.07559100 |
| H | -3.11657000 | -4.34614600 | 0.65273000  |
| H | -1.58310900 | -2.06969300 | -2.65745200 |
| H | -3.47172500 | -3.24768600 | -1.55008000 |
| N | 1.41405200  | 1.24953600  | 1.12135400  |
| O | 3.41666000  | 1.84117100  | 1.88898600  |
| C | -0.03399800 | 2.58065100  | 2.62358200  |
| C | -1.20658100 | 3.16658300  | 2.14134900  |
| C | -0.05796900 | 1.93374200  | 3.86123500  |
| C | -2.38626000 | 3.10543600  | 2.87816100  |
| H | -1.19262600 | 3.66826200  | 1.17251500  |
| C | -1.23363800 | 1.88097100  | 4.60450700  |
| H | 0.84280100  | 1.45340500  | 4.24324500  |
| C | -2.40151800 | 2.46025300  | 4.11213100  |
| H | -3.29274800 | 3.56518900  | 2.48924200  |
| H | -1.24148500 | 1.37245700  | 5.56602700  |
| H | -3.32253500 | 2.40991200  | 4.68893800  |
| C | 5.64726600  | -1.43777000 | 0.66914200  |
| C | 5.52949600  | -2.69428600 | 1.26008600  |
| C | 6.56168800  | -1.24608900 | -0.36478700 |
| C | 6.29463700  | -3.76152800 | 0.79062600  |
| H | 4.83140900  | -2.86632100 | 2.07841000  |
| C | 7.33598400  | -2.31574100 | -0.81875400 |
| H | 6.69886000  | -0.26830300 | -0.82339600 |
| C | 7.20881700  | -3.58638500 | -0.25224100 |
| H | 7.80844900  | -4.41577800 | -0.60879800 |
| C | 3.78000300  | 1.88033500  | -1.15155300 |
| C | 2.65494400  | 2.68144300  | -1.33762400 |
| C | 5.02715000  | 2.47680000  | -0.97828000 |
| C | 2.76325200  | 4.06815500  | -1.27417500 |
| H | 1.67105300  | 2.23413700  | -1.47554700 |
| C | 5.13214900  | 3.87007400  | -0.94410500 |
| H | 5.92830800  | 1.88067100  | -0.84624700 |
| C | 4.00117900  | 4.68263900  | -1.07178100 |
| H | 4.08119200  | 5.76337900  | -1.03184500 |

|   |             |             |             |
|---|-------------|-------------|-------------|
| O | 8.20070300  | -2.02809700 | -1.82696100 |
| O | 6.08391400  | -4.95353100 | 1.40980000  |
| O | 6.38740900  | 4.35946000  | -0.76887900 |
| O | 1.59734500  | 4.75224500  | -1.41054000 |
| C | 6.85227200  | -6.08238100 | 0.99319200  |
| H | 6.67335600  | -6.27636000 | -0.07457200 |
| H | 7.92308800  | -5.86594000 | 1.12129700  |
| C | 6.42762800  | -7.25266000 | 1.83750900  |
| H | 5.36124100  | -7.46310500 | 1.70294000  |
| H | 6.99287800  | -8.14498000 | 1.55174300  |
| H | 6.61121600  | -7.05411900 | 2.89881200  |
| C | 9.03320300  | -3.07281200 | -2.32954300 |
| H | 8.40648900  | -3.89211300 | -2.71161300 |
| H | 9.65232700  | -3.47485100 | -1.51401300 |
| C | 9.88479500  | -2.48390700 | -3.42082000 |
| H | 10.50757300 | -1.67089000 | -3.03265700 |
| H | 10.54301000 | -3.25214000 | -3.83792000 |
| H | 9.26183300  | -2.08810100 | -4.23001100 |
| C | 1.53391600  | 6.09725400  | -0.93577300 |
| H | 1.99037100  | 6.14805500  | 0.06475700  |
| H | 2.10440600  | 6.75912700  | -1.60332900 |
| C | 0.07912700  | 6.47924300  | -0.89319000 |
| H | -0.47189600 | 5.81803300  | -0.21262300 |
| H | -0.03278500 | 7.50873300  | -0.53952200 |
| H | -0.37214300 | 6.40648200  | -1.88911200 |
| C | 6.56334200  | 5.77475000  | -0.70267800 |
| H | 5.96940300  | 6.18045900  | 0.12960000  |
| H | 6.19835400  | 6.23522200  | -1.63257800 |
| C | 8.03105500  | 6.03722600  | -0.50398500 |
| H | 8.61515100  | 5.63201500  | -1.33710400 |
| H | 8.21417000  | 7.11457700  | -0.44764300 |
| H | 8.38650500  | 5.57862200  | 0.42487400  |
| O | -4.24694700 | -1.40699900 | -3.31926600 |
| H | -4.35767000 | -0.93025600 | -4.16196300 |
| H | -5.08501800 | -1.88687200 | -3.13913500 |

2a

2a

Electronic Energy= -1718.710688 Hartree  
Gibbs Free Energy= -1718.362821 Hartree

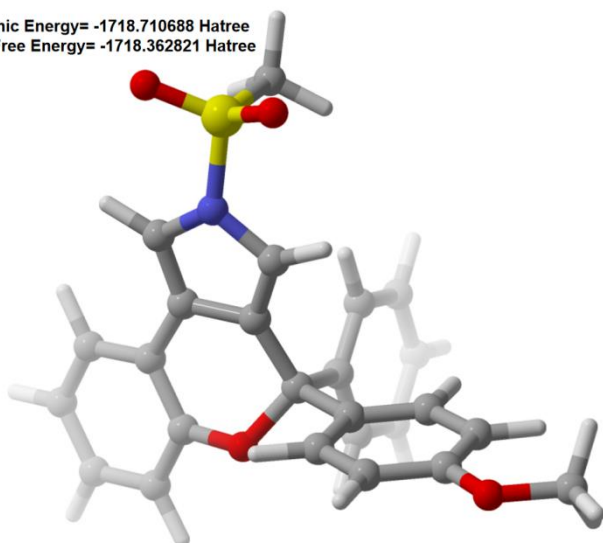

|   |             |             |             |
|---|-------------|-------------|-------------|
| N | 1.76573800  | 2.12257400  | -0.39185500 |
| C | 0.50086200  | 1.61014800  | -0.09898100 |
| H | -0.30190000 | 2.25666300  | 0.23321800  |
| C | 0.55883500  | 0.27039600  | -0.32437200 |
| C | -0.45808600 | -0.81440800 | -0.13924800 |
| C | -1.86427800 | -0.30157500 | -0.38816000 |
| C | -2.23307700 | 0.07049000  | -1.68829300 |
| C | -2.78352500 | -0.11708700 | 0.63869800  |
| C | -3.48907500 | 0.58420400  | -1.95075400 |
| H | -1.52229500 | -0.05043000 | -2.50330300 |
| C | -4.05159200 | 0.41023100  | 0.39231900  |
| H | -2.52137200 | -0.38558300 | 1.65990200  |
| C | -4.40809000 | 0.75733200  | -0.90852100 |
| H | -3.78378800 | 0.86614600  | -2.95893900 |
| H | -4.74435300 | 0.53916000  | 1.21835100  |
| O | -5.61570900 | 1.27146800  | -1.26424900 |
| C | -6.57191000 | 1.46835200  | -0.23642600 |
| H | -7.46032300 | 1.88193700  | -0.71753100 |
| H | -6.83503400 | 0.52192800  | 0.25315400  |
| H | -6.20843500 | 2.17710200  | 0.51867700  |
| C | 2.62905600  | 1.08249400  | -0.73568000 |
| C | 1.88991600  | -0.06878300 | -0.72583500 |
| C | 2.18282200  | -1.44134900 | -1.09575900 |
| C | 3.46317100  | -1.96449500 | -1.29238700 |
| C | 1.07190300  | -2.28058000 | -1.29167600 |
| C | 3.63713900  | -3.28594400 | -1.68287400 |
| H | 4.32494300  | -1.31788500 | -1.13397800 |

|   |             |             |             |
|---|-------------|-------------|-------------|
| C | 1.24127300  | -3.60489000 | -1.68023400 |
| C | 2.52414200  | -4.10323800 | -1.88021900 |
| H | 4.63876700  | -3.68103400 | -1.83153700 |
| H | 0.36000200  | -4.22629700 | -1.82341000 |
| H | 2.65496800  | -5.13970300 | -2.18170800 |
| O | -0.21401800 | -1.81555300 | -1.16703500 |
| C | -0.31593200 | -1.49222800 | 1.22180900  |
| C | 0.25348900  | -0.84328800 | 2.31610000  |
| C | -0.82359600 | -2.78432900 | 1.38680700  |
| C | 0.31831800  | -1.47614000 | 3.55587500  |
| H | 0.65223300  | 0.16411000  | 2.20332000  |
| C | -0.75427000 | -3.41734700 | 2.62176400  |
| H | -1.27585500 | -3.29305700 | 0.53732100  |
| C | -0.18201200 | -2.76404300 | 3.71167200  |
| H | 0.76682300  | -0.95835900 | 4.40059700  |
| H | -1.14914400 | -4.42444200 | 2.73463200  |
| H | -0.12706600 | -3.25916900 | 4.67833300  |
| S | 2.31483200  | 3.59978800  | 0.23537700  |
| O | 3.54679200  | 3.90774200  | -0.47733600 |
| O | 1.18293300  | 4.51375900  | 0.17071400  |
| C | 2.67262000  | 3.20263500  | 1.91923400  |
| H | 3.42068600  | 2.40500500  | 1.93250700  |
| H | 3.06262900  | 4.10591400  | 2.39647400  |
| H | 1.74473700  | 2.88095800  | 2.40051100  |
| H | 3.65770100  | 1.28372400  | -1.00553200 |

[CuL14]-S TS<sub>B</sub>

TS<sub>B-C-S</sub>

Electronic Energy= -5509.277649 Hartree  
Gibbs Free Energy= -5508.190929 Hartree

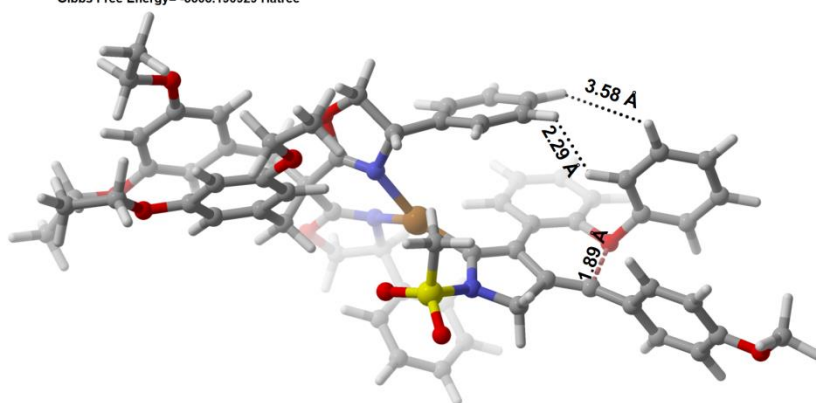

|   |             |            |             |
|---|-------------|------------|-------------|
| N | -2.37615300 | 0.14863000 | -1.87212900 |
| C | -3.77549300 | 0.48515100 | -2.20610400 |
| H | -4.05666100 | 0.08996100 | -3.18707400 |
| H | -3.94546400 | 1.57069400 | -2.20562600 |

|   |              |             |             |
|---|--------------|-------------|-------------|
| C | -4.50463900  | -0.16667500 | -1.06257300 |
| C | -5.82622500  | -0.17751500 | -1.01257600 |
| C | -7.04410000  | 0.37889900  | -1.45358500 |
| C | -8.06180700  | -0.43559900 | -1.99846500 |
| C | -7.29733300  | 1.75360100  | -1.26991300 |
| C | -9.27652200  | 0.10672600  | -2.34563000 |
| H | -7.87560200  | -1.49954800 | -2.12587000 |
| C | -8.50796900  | 2.31173000  | -1.63614600 |
| H | -6.52023300  | 2.37791000  | -0.83228000 |
| C | -9.50617100  | 1.48317100  | -2.16851500 |
| H | -10.07484700 | -0.50120900 | -2.76279900 |
| H | -8.67746300  | 3.37473700  | -1.49792300 |
| O | -10.72042000 | 1.91708800  | -2.54130700 |
| C | -11.02312700 | 3.29986600  | -2.38717300 |
| H | -12.04504400 | 3.42674700  | -2.74688000 |
| H | -10.96696100 | 3.59987900  | -1.33445700 |
| H | -10.34591500 | 3.92018800  | -2.98564200 |
| C | -2.23778600  | -0.48651500 | -0.63252100 |
| C | -3.51856900  | -0.72751700 | -0.16469900 |
| C | -3.91035800  | -1.53358900 | 0.98180100  |
| C | -3.00425000  | -2.31900400 | 1.71596900  |
| C | -5.24621300  | -1.62141400 | 1.38618700  |
| C | -3.40959900  | -3.10202500 | 2.78646600  |
| H | -1.95479600  | -2.30655400 | 1.42760900  |
| C | -5.67916900  | -2.40170700 | 2.44733200  |
| C | -4.75105200  | -3.14655900 | 3.16334000  |
| H | -2.66986500  | -3.68685500 | 3.32901400  |
| H | -6.73709300  | -2.41304100 | 2.70012700  |
| H | -5.07561000  | -3.76139700 | 3.99820900  |
| O | -6.24065000  | -0.89258300 | 0.68784100  |
| C | -6.91470900  | 0.08302700  | 1.44888100  |
| C | -6.18842300  | 1.10208600  | 2.04565800  |
| C | -8.29679700  | 0.01729200  | 1.49473500  |
| C | -6.88390300  | 2.09562700  | 2.72461400  |
| H | -5.10261800  | 1.11366300  | 1.96616900  |
| C | -8.98002700  | 1.02651400  | 2.16932400  |
| H | -8.81528300  | -0.79963200 | 0.99889100  |
| C | -8.27705600  | 2.06099800  | 2.78091900  |
| H | -6.33575200  | 2.90441000  | 3.20242100  |
| H | -10.06563000 | 1.00087100  | 2.21517600  |
| H | -8.81633800  | 2.84578500  | 3.30507000  |
| S | -1.13974200  | 1.04328900  | -2.55086600 |
| O | 0.08236000   | 0.23905500  | -2.52558700 |
| O | -1.64823800  | 1.50880100  | -3.84025900 |

|    |             |             |             |
|----|-------------|-------------|-------------|
| C  | -0.92456200 | 2.42855700  | -1.46828800 |
| H  | -0.67497700 | 2.04247000  | -0.47540400 |
| H  | -0.10946600 | 3.04284900  | -1.86204200 |
| H  | -1.85830300 | 2.99769400  | -1.44138700 |
| Cu | -0.50368700 | -0.84636500 | 0.14595000  |
| C  | 2.89403500  | -1.45998600 | 0.71802900  |
| C  | 4.04390200  | -2.00427500 | 1.63021800  |
| H  | 3.74552300  | -1.85028600 | 2.67263400  |
| H  | 4.09117200  | -3.08537400 | 1.48108500  |
| C  | 3.33975400  | -1.00917700 | -0.72569000 |
| H  | 3.93514500  | -1.83033900 | -1.14161400 |
| H  | 2.41654400  | -0.94921100 | -1.32188400 |
| C  | 1.93818600  | -2.60821700 | 0.44926800  |
| C  | 1.50810500  | -4.71395200 | -0.18055100 |
| C  | 0.19983600  | -3.93847600 | 0.02911300  |
| H  | 1.61657600  | -5.14257100 | -1.18030100 |
| H  | 1.66615800  | -5.49239000 | 0.57088700  |
| H  | -0.41676700 | -4.41383800 | 0.80165300  |
| C  | 2.17092300  | -0.31326000 | 1.38656200  |
| C  | 2.01703600  | 1.44558100  | 2.76779000  |
| C  | 0.75013300  | 1.33146600  | 1.90384800  |
| H  | 1.83136700  | 1.36447200  | 3.84268000  |
| H  | 2.59408700  | 2.35082800  | 2.55741500  |
| H  | 0.65634300  | 2.21255100  | 1.25201400  |
| O  | 2.54117500  | -3.71754700 | -0.00594800 |
| N  | 0.66082100  | -2.62484800 | 0.53746000  |
| C  | -0.63412900 | -3.75488300 | -1.21175900 |
| C  | -1.98813100 | -4.08586300 | -1.20834200 |
| C  | -0.06621500 | -3.21445400 | -2.36960800 |
| C  | -2.77030000 | -3.87494400 | -2.34200400 |
| H  | -2.43335100 | -4.50372800 | -0.30536800 |
| C  | -0.84275400 | -3.01076200 | -3.50460500 |
| H  | 0.99224800  | -2.94789600 | -2.37959600 |
| C  | -2.19837100 | -3.33791300 | -3.49186000 |
| H  | -3.82668800 | -4.13462100 | -2.32675900 |
| H  | -0.39170000 | -2.59006200 | -4.40068300 |
| H  | -2.80585500 | -3.17608600 | -4.37946900 |
| N  | 1.02889000  | 0.15877700  | 1.05390500  |
| O  | 2.82456000  | 0.31254200  | 2.36852800  |
| C  | -0.54381400 | 1.14283500  | 2.65097700  |
| C  | -0.71066800 | 0.04723400  | 3.50363700  |
| C  | -1.60052100 | 2.03293000  | 2.46859400  |
| C  | -1.92130200 | -0.15822000 | 4.15595500  |
| H  | 0.11374900  | -0.65375200 | 3.64602100  |



|   |             |             |             |
|---|-------------|-------------|-------------|
| C | -2.81258100 | 1.83070300  | 3.12593500  |
| H | -1.47019300 | 2.89012400  | 1.80820500  |
| C | -2.97898600 | 0.72965100  | 3.96189200  |
| H | -2.04487500 | -1.01787400 | 4.81098500  |
| H | -3.62844100 | 2.53784700  | 2.98496400  |
| H | -3.93260800 | 0.56358800  | 4.46069900  |
| C | 5.42836800  | -1.46221000 | 1.39497100  |
| C | 6.31366600  | -2.22405800 | 0.63427800  |
| C | 5.83619000  | -0.22537200 | 1.88939900  |
| C | 7.58680700  | -1.73550600 | 0.34094700  |
| H | 6.01141900  | -3.18818600 | 0.22742800  |
| C | 7.10296000  | 0.26245100  | 1.57503200  |
| H | 5.16463600  | 0.40184700  | 2.46884700  |
| C | 8.00283600  | -0.49191100 | 0.81792800  |
| H | 8.99246200  | -0.11315400 | 0.58874500  |
| C | 4.09486700  | 0.29005300  | -0.87854500 |
| C | 3.49270800  | 1.51449300  | -0.58195100 |
| C | 5.39680700  | 0.28215300  | -1.37215200 |
| C | 4.21783000  | 2.69976000  | -0.68810700 |
| H | 2.45080800  | 1.58145000  | -0.28033400 |
| C | 6.11357000  | 1.47383300  | -1.49064300 |
| H | 5.89367200  | -0.65151700 | -1.62690700 |
| C | 5.54179600  | 2.69819300  | -1.13509300 |
| H | 6.10065200  | 3.62288900  | -1.22386700 |
| O | 7.38143800  | 1.51365600  | 2.03384000  |
| O | 8.36386600  | -2.53340300 | -0.44204300 |
| O | 7.38938400  | 1.34833200  | -1.94454000 |
| O | 3.54216700  | 3.82763600  | -0.33652600 |
| C | 9.55825500  | -1.97597900 | -0.99032100 |
| H | 9.30931000  | -1.04581000 | -1.52652200 |
| H | 10.25864200 | -1.72170200 | -0.18131300 |
| C | 10.15279400 | -3.00205300 | -1.91570900 |
| H | 9.45664300  | -3.24690400 | -2.72493000 |
| H | 11.07545000 | -2.61606000 | -2.35972900 |
| H | 10.39203700 | -3.92284500 | -1.37292500 |
| C | 8.56801900  | 2.15515900  | 1.57055900  |
| H | 8.66937500  | 1.99982900  | 0.48607900  |
| H | 9.44742400  | 1.70396400  | 2.05385400  |
| C | 8.44497000  | 3.62039700  | 1.88727000  |
| H | 8.33214600  | 3.78403500  | 2.96440400  |
| H | 9.33840300  | 4.15480200  | 1.54921000  |
| H | 7.57249800  | 4.04790000  | 1.37782900  |
| C | 4.21577800  | 5.08206200  | -0.43350600 |
| H | 5.10932800  | 5.07125400  | 0.20885200  |

|   |             |            |             |
|---|-------------|------------|-------------|
| H | 4.54773900  | 5.24344400 | -1.46977000 |
| C | 3.24599000  | 6.14706300 | 0.00028800  |
| H | 2.92318700  | 5.98155500 | 1.03383800  |
| H | 3.71898500  | 7.13200100 | -0.05889300 |
| H | 2.36000400  | 6.15138400 | -0.64389100 |
| C | 8.17005400  | 2.52649100 | -2.14048300 |
| H | 8.18359500  | 3.12723900 | -1.21721800 |
| H | 7.71457400  | 3.14036100 | -2.93157600 |
| C | 9.56099900  | 2.08355500 | -2.50392900 |
| H | 9.54942500  | 1.45572300 | -3.40164700 |
| H | 10.19478800 | 2.95388600 | -2.69981000 |
| H | 10.00977700 | 1.50871700 | -1.68399900 |

[CuL14]-R TS<sub>B</sub>

**TS<sub>B-C-R</sub>**

Electronic Energy= -5509.277219 Hatree  
Gibbs Free Energy= -5508.194192 Hatree

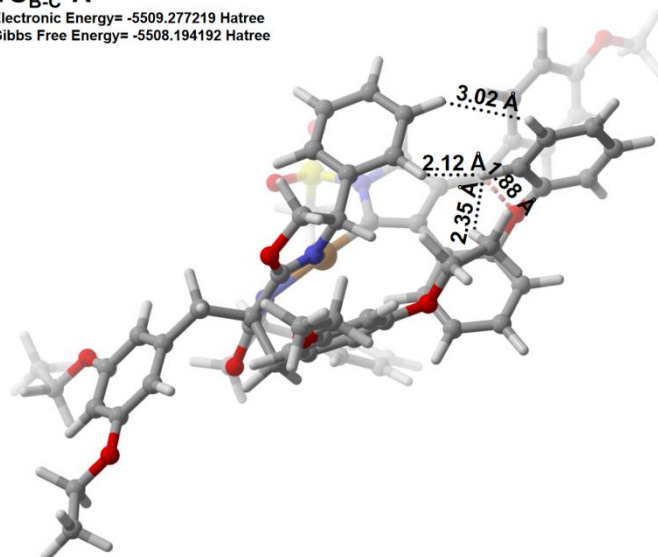

|   |            |             |             |
|---|------------|-------------|-------------|
| N | 2.23199900 | -2.56187100 | -0.98755300 |
| C | 3.69924100 | -2.62651300 | -0.85657800 |
| H | 4.19176100 | -2.42626700 | -1.81588200 |
| H | 4.03493900 | -3.60415400 | -0.48718700 |
| C | 3.93598900 | -1.52313400 | 0.13892100  |
| C | 5.16528700 | -1.19785800 | 0.50580700  |
| C | 6.53191900 | -1.22773900 | 0.15282700  |
| C | 6.95158200 | -0.68309800 | -1.08424600 |
| C | 7.50346700 | -1.72003400 | 1.04303800  |
| C | 8.28610000 | -0.65431800 | -1.41614800 |
| H | 6.20067700 | -0.29180300 | -1.77040300 |
| C | 8.84811900 | -1.68184800 | 0.72478900  |
| H | 7.18280400 | -2.12296200 | 2.00129800  |

|    |             |             |             |
|----|-------------|-------------|-------------|
| C  | 9.24224100  | -1.14657000 | -0.51069800 |
| H  | 8.63000000  | -0.24927000 | -2.36417500 |
| H  | 9.58171200  | -2.06516500 | 1.42649700  |
| O  | 10.51882600 | -1.06265400 | -0.91766800 |
| C  | 11.54063100 | -1.53668100 | -0.04704300 |
| H  | 12.48351600 | -1.36831300 | -0.56907100 |
| H  | 11.54264800 | -0.98043800 | 0.89737900  |
| H  | 11.42164600 | -2.60761300 | 0.15386200  |
| C  | 1.62388800  | -1.66323300 | -0.11244700 |
| C  | 2.65112400  | -1.01017700 | 0.55435600  |
| C  | 2.54857700  | 0.05482400  | 1.53907900  |
| C  | 1.31976400  | 0.51784800  | 2.04349200  |
| C  | 3.68627200  | 0.67180400  | 2.07480300  |
| C  | 1.24458400  | 1.49789300  | 3.02196200  |
| H  | 0.40214600  | 0.07256200  | 1.66110200  |
| C  | 3.63756300  | 1.64507300  | 3.06189300  |
| C  | 2.40522200  | 2.06336000  | 3.54703200  |
| H  | 0.26757900  | 1.81725800  | 3.38150100  |
| H  | 4.56665900  | 2.06983000  | 3.43545600  |
| H  | 2.35583800  | 2.82335700  | 4.32197900  |
| O  | 4.98074700  | 0.31234200  | 1.60906300  |
| C  | 5.72530600  | 1.38045000  | 1.06388000  |
| C  | 6.99460800  | 1.60763400  | 1.56663300  |
| C  | 5.19843800  | 2.09824700  | 0.00248000  |
| C  | 7.77075600  | 2.59568600  | 0.96413400  |
| H  | 7.36235400  | 1.01252200  | 2.39867400  |
| C  | 5.97986500  | 3.08739800  | -0.58283800 |
| H  | 4.20121200  | 1.86290600  | -0.36382100 |
| C  | 7.26730200  | 3.33125200  | -0.10580600 |
| H  | 8.77349600  | 2.78922100  | 1.33610000  |
| H  | 5.58228500  | 3.65799600  | -1.41956800 |
| H  | 7.88068300  | 4.09867900  | -0.57074900 |
| S  | 1.42260500  | -3.79352700 | -1.76549100 |
| O  | 0.15663900  | -3.27756100 | -2.28499200 |
| O  | 2.38774600  | -4.36354600 | -2.70535900 |
| C  | 1.06514500  | -4.97163300 | -0.49664000 |
| H  | 0.42876900  | -4.47671500 | 0.24436100  |
| H  | 0.54363900  | -5.81734600 | -0.95338400 |
| H  | 2.00709700  | -5.29703900 | -0.04546200 |
| Cu | -0.26899600 | -1.24962700 | -0.20440500 |
| C  | -3.41603300 | 0.41475700  | -0.33079500 |
| C  | -3.72974900 | 1.37923300  | 0.88717600  |
| H  | -4.81887900 | 1.43319600  | 0.99479000  |
| H  | -3.33870700 | 0.91064300  | 1.79768400  |

|   |             |             |             |
|---|-------------|-------------|-------------|
| C | -4.58399700 | 0.39343500  | -1.37171600 |
| H | -4.77411000 | 1.43926700  | -1.63823800 |
| H | -4.20530900 | -0.10811000 | -2.27206600 |
| C | -2.19544800 | 0.93190700  | -1.05635300 |
| C | -1.17378900 | 2.33650100  | -2.46587400 |
| C | -0.14604900 | 1.59800400  | -1.60031300 |
| H | -1.14121200 | 2.03229500  | -3.51863600 |
| H | -1.11021300 | 3.42571900  | -2.39454900 |
| H | 0.27660100  | 2.27492000  | -0.83786600 |
| C | -3.21181500 | -0.95877300 | 0.25477100  |
| C | -3.97165100 | -2.71380100 | 1.40493700  |
| C | -2.53388600 | -2.96565500 | 0.93745900  |
| H | -4.12913800 | -2.86017000 | 2.47597000  |
| H | -4.70948900 | -3.29203000 | 0.83553800  |
| H | -2.47265400 | -3.88361500 | 0.34143400  |
| O | -2.44704100 | 1.92359100  | -1.92352000 |
| N | -0.97150000 | 0.61337200  | -0.87170200 |
| C | 0.98730100  | 0.97588700  | -2.36619100 |
| C | 2.29066200  | 1.43322200  | -2.17834100 |
| C | 0.75572100  | -0.07219500 | -3.26000300 |
| C | 3.35560200  | 0.83589700  | -2.84989200 |
| H | 2.46478800  | 2.27250900  | -1.50174300 |
| C | 1.81679500  | -0.67621900 | -3.92618000 |
| H | -0.26280800 | -0.42765500 | -3.41844000 |
| C | 3.12092800  | -0.22878000 | -3.71639800 |
| H | 4.36951400  | 1.20436200  | -2.69629100 |
| H | 1.62768400  | -1.50239600 | -4.60840100 |
| H | 3.95153500  | -0.70321100 | -4.23495300 |
| N | -2.26278800 | -1.80300300 | 0.05951100  |
| O | -4.18394700 | -1.31922300 | 1.10361500  |
| C | -1.52433000 | -3.04546500 | 2.05385400  |
| C | -0.92451800 | -4.26642700 | 2.36231500  |
| C | -1.18356200 | -1.91359400 | 2.80041500  |
| C | 0.02487300  | -4.35432200 | 3.37756200  |
| H | -1.19891500 | -5.15335000 | 1.79129500  |
| C | -0.24139100 | -2.00097300 | 3.82016600  |
| H | -1.64560600 | -0.94986100 | 2.57570500  |
| C | 0.37210800  | -3.21949200 | 4.10476900  |
| H | 0.49310800  | -5.31062900 | 3.59919100  |
| H | 0.02082200  | -1.11170600 | 4.38972100  |
| H | 1.11351500  | -3.28439700 | 4.89767700  |
| C | -3.11674000 | 2.74351500  | 0.76965600  |
| C | -3.79757100 | 3.81482200  | 0.20137700  |
| C | -1.78049300 | 2.88778600  | 1.13957600  |

|   |              |             |             |
|---|--------------|-------------|-------------|
| C | -3.11898200  | 5.01286500  | -0.04487800 |
| H | -4.84186700  | 3.72630000  | -0.09461000 |
| C | -1.10128600  | 4.06740200  | 0.85380500  |
| H | -1.23195700  | 2.05459700  | 1.57847700  |
| C | -1.75978000  | 5.14658200  | 0.25763300  |
| H | -1.22491300  | 6.06747500  | 0.05002600  |
| C | -5.86824000  | -0.26112700 | -0.95293300 |
| C | -6.88383200  | 0.48487000  | -0.35971900 |
| C | -6.05041100  | -1.62519800 | -1.17263100 |
| C | -8.06770900  | -0.14194700 | 0.03660100  |
| H | -6.78050300  | 1.55833500  | -0.20837200 |
| C | -7.22614100  | -2.24724200 | -0.75704100 |
| H | -5.26972400  | -2.22626100 | -1.63866600 |
| C | -8.25150100  | -1.51355900 | -0.15151000 |
| H | -9.16925400  | -1.99794800 | 0.16098300  |
| O | 0.21875900   | 4.08510500  | 1.18418800  |
| O | -3.86201500  | 6.00377800  | -0.60337400 |
| O | -7.29360100  | -3.58729600 | -0.97736900 |
| O | -9.00052700  | 0.66830800  | 0.60229100  |
| C | -3.22308000  | 7.24334800  | -0.90744800 |
| H | -2.80338700  | 7.67682000  | 0.01224500  |
| H | -2.39184600  | 7.06696200  | -1.60592600 |
| C | -4.26085900  | 8.14872800  | -1.51236400 |
| H | -5.08352400  | 8.32141800  | -0.81031500 |
| H | -3.81363600  | 9.11559300  | -1.76253100 |
| H | -4.67208300  | 7.71223000  | -2.42877600 |
| C | 1.10084100   | 4.90182700  | 0.41132900  |
| H | 0.97016000   | 5.96084600  | 0.67657400  |
| H | 0.85310100   | 4.78668100  | -0.65616800 |
| C | 2.50225000   | 4.43089100  | 0.69948600  |
| H | 2.59539500   | 3.35785800  | 0.48179000  |
| H | 3.22210100   | 4.97513700  | 0.07903200  |
| H | 2.76427000   | 4.58965600  | 1.75194700  |
| C | -10.23907900 | 0.09445100  | 1.01917800  |
| H | -10.73539600 | -0.37561900 | 0.15737200  |
| H | -10.04937100 | -0.68965900 | 1.76692100  |
| C | -11.07730800 | 1.20354000  | 1.59378700  |
| H | -11.26392000 | 1.97905300  | 0.84329800  |
| H | -12.04172600 | 0.80953700  | 1.92852600  |
| H | -10.57730500 | 1.66457500  | 2.45225800  |
| C | -8.47787500  | -4.28265100 | -0.58802500 |
| H | -9.34526100  | -3.85423100 | -1.11136800 |
| H | -8.64082900  | -4.15696400 | 0.49253500  |
| C | -8.28701500  | -5.73145600 | -0.94482700 |

|   |             |             |             |
|---|-------------|-------------|-------------|
| H | -7.42366000 | -6.15166200 | -0.41790300 |
| H | -9.17462200 | -6.30632700 | -0.66360000 |
| H | -8.12741300 | -5.84939500 | -2.02191500 |

TS<sub>c-c'</sub>

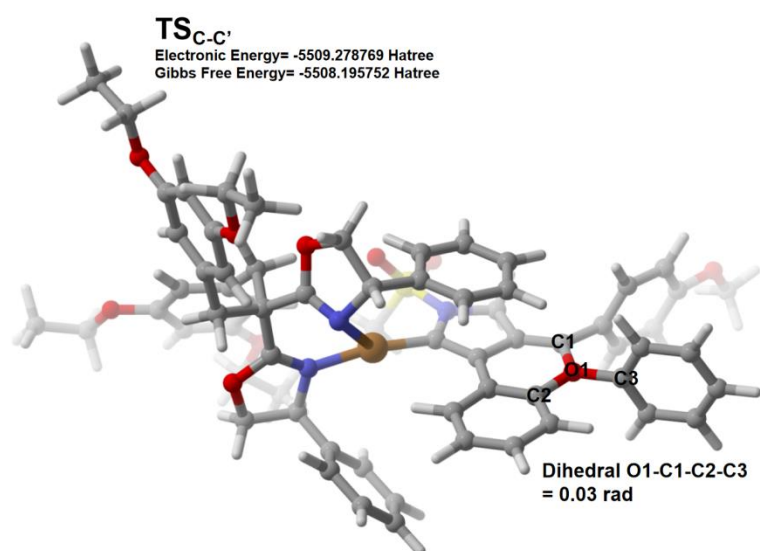

|   |             |             |             |
|---|-------------|-------------|-------------|
| N | 2.27011200  | -1.53585000 | -1.35760700 |
| C | 3.71860100  | -1.45266300 | -1.64013100 |
| H | 3.91222800  | -0.99584100 | -2.61801400 |
| H | 4.18913400  | -2.44447100 | -1.61961300 |
| C | 4.15674200  | -0.57777200 | -0.50526200 |
| C | 5.35853500  | -0.01989000 | -0.39487900 |
| C | 6.54742700  | -0.12257900 | -1.22997100 |
| C | 6.88081200  | 0.88346200  | -2.15265500 |
| C | 7.34636400  | -1.26775300 | -1.16522300 |
| C | 7.98731600  | 0.74998400  | -2.96737900 |
| H | 6.25661600  | 1.77310600  | -2.22406600 |
| C | 8.45602900  | -1.42017400 | -1.98819900 |
| H | 7.09041000  | -2.05262500 | -0.45547600 |
| C | 8.78073700  | -0.40305000 | -2.88904600 |
| H | 8.25713500  | 1.51950300  | -3.68628900 |
| H | 9.05604500  | -2.32209000 | -1.91953900 |
| O | 9.83846100  | -0.44353200 | -3.73226800 |
| C | 10.66825200 | -1.59525300 | -3.70024800 |
| H | 11.44884300 | -1.43029000 | -4.44486400 |
| H | 11.13078200 | -1.72571600 | -2.71411300 |
| H | 10.10461100 | -2.49947600 | -3.96125400 |

|    |             |             |             |
|----|-------------|-------------|-------------|
| C  | 1.88484200  | -0.91339900 | -0.16173700 |
| C  | 3.02818800  | -0.37127900 | 0.37083400  |
| C  | 3.21181400  | 0.44405300  | 1.55407200  |
| C  | 2.22483100  | 0.65755800  | 2.52590000  |
| C  | 4.42712800  | 1.10056300  | 1.77004300  |
| C  | 2.43712800  | 1.49573100  | 3.61102400  |
| H  | 1.26713700  | 0.14823300  | 2.40833600  |
| C  | 4.67821200  | 1.93371400  | 2.84323700  |
| C  | 3.65999300  | 2.13826300  | 3.77162900  |
| H  | 1.64223600  | 1.64074500  | 4.33925400  |
| H  | 5.63714700  | 2.42536600  | 2.96793600  |
| H  | 3.83910700  | 2.79394600  | 4.61868700  |
| O  | 5.48756800  | 0.92502500  | 0.78819100  |
| C  | 6.73177700  | 1.61091300  | 0.96819100  |
| C  | 7.75494000  | 0.93557800  | 1.60346600  |
| C  | 6.82655900  | 2.90137300  | 0.48428400  |
| C  | 8.96545900  | 1.60623200  | 1.75086300  |
| H  | 7.60400600  | -0.08122700 | 1.95717900  |
| C  | 8.04375500  | 3.55562800  | 0.64718700  |
| H  | 5.97343700  | 3.36685600  | -0.00509800 |
| C  | 9.10610200  | 2.90784600  | 1.27434100  |
| H  | 9.79840100  | 1.10846100  | 2.23919000  |
| H  | 8.16070200  | 4.57111800  | 0.27957500  |
| H  | 10.05493300 | 3.42409500  | 1.39387700  |
| S  | 1.22557100  | -2.40176200 | -2.30646700 |
| O  | 0.05021700  | -1.57738900 | -2.60696900 |
| O  | 2.02551200  | -2.90631300 | -3.42297700 |
| C  | 0.69370200  | -3.75707900 | -1.29542900 |
| H  | 0.21352700  | -3.34715400 | -0.39843000 |
| H  | -0.02016100 | -4.34328200 | -1.88215300 |
| H  | 1.56937000  | -4.35722000 | -1.03259800 |
| Cu | 0.07836200  | -0.86612900 | 0.46428000  |
| C  | -3.39537200 | 0.30767900  | 0.38434600  |
| C  | -4.73600200 | 0.81354600  | 1.00338800  |
| H  | -5.43076400 | -0.03358700 | 1.01127400  |
| H  | -4.53070600 | 1.07300600  | 2.04952100  |
| C  | -3.59841100 | -0.37669800 | -1.01478800 |
| H  | -4.30977200 | 0.23467500  | -1.58138600 |
| H  | -2.63596100 | -0.33922400 | -1.54311300 |
| C  | -2.47090300 | 1.48398700  | 0.20891600  |
| C  | -2.02529900 | 3.45370300  | -0.71373300 |
| C  | -0.96669500 | 3.09193200  | 0.33007900  |
| H  | -1.62460900 | 3.76411300  | -1.68139000 |
| H  | -2.73244800 | 4.20880300  | -0.34598100 |

|   |             |             |             |
|---|-------------|-------------|-------------|
| H | -0.87135300 | 3.88547500  | 1.07847800  |
| C | -2.81746100 | -0.74679200 | 1.29711500  |
| C | -3.03303500 | -2.48655200 | 2.70072000  |
| C | -1.58111000 | -2.37534800 | 2.21725700  |
| H | -3.14801700 | -2.40909900 | 3.78542900  |
| H | -3.53451100 | -3.39144600 | 2.34209900  |
| H | -1.29906300 | -3.26211700 | 1.63086200  |
| O | -2.75113000 | 2.22177700  | -0.89184000 |
| N | -1.53655800 | 1.88474600  | 0.98249200  |
| C | 0.39443600  | 2.82711300  | -0.26652200 |
| C | 1.53382000  | 3.41251200  | 0.28513400  |
| C | 0.52968800  | 2.03461300  | -1.41331400 |
| C | 2.78321200  | 3.22942100  | -0.30519900 |
| H | 1.43763100  | 4.02870600  | 1.17902500  |
| C | 1.77334700  | 1.85930800  | -2.00999800 |
| H | -0.35055300 | 1.56472100  | -1.85514900 |
| C | 2.90427700  | 2.46036000  | -1.45913300 |
| H | 3.66165100  | 3.69825900  | 0.13658800  |
| H | 1.85975300  | 1.24632200  | -2.90574200 |
| H | 3.87900000  | 2.32377800  | -1.92745600 |
| N | -1.62738500 | -1.21978100 | 1.29191800  |
| O | -3.69736000 | -1.35372700 | 2.09785700  |
| C | -0.54518700 | -2.14508900 | 3.28593300  |
| C | 0.61635700  | -2.91566800 | 3.31658200  |
| C | -0.71381800 | -1.12040400 | 4.22097100  |
| C | 1.59598300  | -2.67532100 | 4.27821700  |
| H | 0.74857000  | -3.71129300 | 2.58225600  |
| C | 0.26032700  | -0.88284600 | 5.18419500  |
| H | -1.61487600 | -0.50601200 | 4.19209400  |
| C | 1.41785200  | -1.65991000 | 5.21334800  |
| H | 2.49624600  | -3.28516700 | 4.29834000  |
| H | 0.11948800  | -0.08749900 | 5.91282800  |
| H | 2.18066700  | -1.47135500 | 5.96529200  |
| C | -5.38258300 | 1.99051800  | 0.32923900  |
| C | -5.10115100 | 3.27980300  | 0.77657800  |
| C | -6.27347600 | 1.80694900  | -0.72662800 |
| C | -5.67595800 | 4.38079800  | 0.14217900  |
| H | -4.41684700 | 3.44795900  | 1.60731300  |
| C | -6.85763900 | 2.91358400  | -1.34613100 |
| H | -6.53764900 | 0.81057800  | -1.07713300 |
| C | -6.56247900 | 4.21267600  | -0.92505700 |
| H | -7.01401500 | 5.06974900  | -1.41088500 |
| C | -4.04639000 | -1.80926400 | -0.92846700 |
| C | -3.07497800 | -2.80853100 | -0.94394800 |



|   |             |             |             |
|---|-------------|-------------|-------------|
| C | -5.38292000 | -2.15438800 | -0.73776200 |
| C | -3.42744100 | -4.13464700 | -0.70522900 |
| H | -2.02567100 | -2.56015800 | -1.09557900 |
| C | -5.73283100 | -3.49067600 | -0.52618600 |
| H | -6.16896900 | -1.40130400 | -0.73593100 |
| C | -4.76012500 | -4.49544400 | -0.49120900 |
| H | -5.02989800 | -5.53114800 | -0.31628600 |
| O | -7.71439600 | 2.63361600  | -2.36335600 |
| O | -5.31074300 | 5.59660800  | 0.62910700  |
| O | -7.05940400 | -3.72750500 | -0.35158500 |
| O | -2.39506600 | -5.01670200 | -0.68629300 |
| C | -5.87999600 | 6.76572200  | 0.03987200  |
| H | -5.63154900 | 6.79769100  | -1.03105800 |
| H | -6.97550700 | 6.72728900  | 0.13051300  |
| C | -5.31412700 | 7.95589600  | 0.76523900  |
| H | -4.22368500 | 7.98843800  | 0.66791500  |
| H | -5.72442000 | 8.87963100  | 0.34599900  |
| H | -5.56670500 | 7.91919200  | 1.83029200  |
| C | -8.35232000 | 3.71953100  | -3.03473200 |
| H | -7.59024800 | 4.38293700  | -3.46951600 |
| H | -8.93687800 | 4.30725500  | -2.31159600 |
| C | -9.23609900 | 3.13266200  | -4.10117800 |
| H | -9.99333100 | 2.47520400  | -3.66089300 |
| H | -9.74880700 | 3.93244300  | -4.64421900 |
| H | -8.64706400 | 2.55188200  | -4.81895000 |
| C | -2.60304900 | -6.30782300 | -0.11508800 |
| H | -3.09647200 | -6.19551900 | 0.86245000  |
| H | -3.26408300 | -6.90276600 | -0.76200500 |
| C | -1.24858400 | -6.94805600 | 0.02612800  |
| H | -0.60270900 | -6.34298500 | 0.67424100  |
| H | -1.34481100 | -7.94439300 | 0.46825600  |
| H | -0.76216400 | -7.05115300 | -0.95025500 |
| C | -7.48903300 | -5.06932400 | -0.12217400 |
| H | -7.00071500 | -5.46304600 | 0.78139200  |
| H | -7.18920800 | -5.70211700 | -0.97045300 |
| C | -8.98477600 | -5.04193400 | 0.03527600  |
| H | -9.46397000 | -4.64947800 | -0.86793600 |
| H | -9.36096700 | -6.05418000 | 0.21202000  |
| H | -9.27554400 | -4.41348500 | 0.88377600  |

C'

C'

Electronic Energy= -5509.282475 Hartree  
Gibbs Free Energy= -5508.194138 Hartree

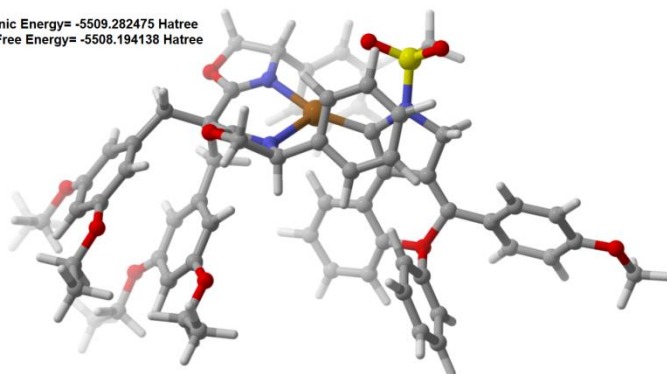

|   |              |             |             |
|---|--------------|-------------|-------------|
| N | -3.74490300  | -2.03441000 | 0.62113700  |
| C | -4.91950800  | -1.16959400 | 0.36345100  |
| H | -5.38784800  | -0.88394300 | 1.31207100  |
| H | -5.67644700  | -1.67214300 | -0.25590000 |
| C | -4.27397300  | -0.01648000 | -0.34027700 |
| C | -4.87079100  | 1.09897400  | -0.78762400 |
| C | -6.24437800  | 1.57138900  | -0.80670000 |
| C | -7.06606600  | 1.39276600  | 0.31774400  |
| C | -6.78434900  | 2.20085700  | -1.93436400 |
| C | -8.38788900  | 1.79882700  | 0.29842700  |
| H | -6.65547900  | 0.94744400  | 1.22228800  |
| C | -8.10449500  | 2.63144700  | -1.95605500 |
| H | -6.16136200  | 2.35324600  | -2.81362800 |
| C | -8.91565700  | 2.42082900  | -0.83798000 |
| H | -9.03029100  | 1.66246400  | 1.16492600  |
| H | -8.49335700  | 3.11599200  | -2.84633700 |
| O | -10.21914000 | 2.79049200  | -0.75980900 |
| C | -10.79266400 | 3.42891900  | -1.88945800 |
| H | -11.83051300 | 3.64190600  | -1.62692500 |
| H | -10.27866500 | 4.37046800  | -2.12066200 |
| H | -10.77073700 | 2.77662300  | -2.77161500 |
| C | -2.55685400  | -1.55334900 | 0.06811600  |
| C | -2.87627200  | -0.33145100 | -0.49509500 |
| C | -2.06718500  | 0.53185200  | -1.32642000 |
| C | -0.77666800  | 0.23674600  | -1.79724300 |
| C | -2.62063500  | 1.71196800  | -1.82086800 |
| C | -0.11609000  | 1.07900800  | -2.67883300 |
| H | -0.30922300  | -0.69088200 | -1.46869800 |
| C | -2.01154100  | 2.56239000  | -2.72115400 |

|    |             |             |             |
|----|-------------|-------------|-------------|
| C  | -0.73012900 | 2.23884500  | -3.15465700 |
| H  | 0.88782000  | 0.81938400  | -3.01079400 |
| H  | -2.52085900 | 3.46029800  | -3.06104300 |
| H  | -0.21885000 | 2.89057900  | -3.85687300 |
| O  | -3.92699000 | 2.13497200  | -1.32184300 |
| C  | -3.86791800 | 3.31146400  | -0.46745700 |
| C  | -4.31806300 | 4.50227600  | -0.99813900 |
| C  | -3.38580500 | 3.15648000  | 0.81678300  |
| C  | -4.26885700 | 5.62197900  | -0.16969200 |
| H  | -4.69124200 | 4.54915500  | -2.01737400 |
| C  | -3.34766000 | 4.28602900  | 1.62623200  |
| H  | -3.05512600 | 2.18178000  | 1.16740400  |
| C  | -3.78870900 | 5.51308100  | 1.13262800  |
| H  | -4.61364400 | 6.58032600  | -0.54763100 |
| H  | -2.97367800 | 4.20092200  | 2.64369000  |
| H  | -3.75913800 | 6.39248400  | 1.77039600  |
| S  | -3.99726400 | -3.60622800 | 1.11436900  |
| O  | -2.70730700 | -4.19329200 | 1.47294100  |
| O  | -5.06249100 | -3.56220900 | 2.11653200  |
| C  | -4.61898200 | -4.43057200 | -0.32467700 |
| H  | -3.90906000 | -4.27099600 | -1.14179600 |
| H  | -4.70603700 | -5.49494300 | -0.08813000 |
| H  | -5.59950400 | -4.01746400 | -0.57551800 |
| Cu | -0.77534300 | -2.23165000 | 0.40368900  |
| C  | 2.73436600  | -2.07486500 | 0.60831000  |
| C  | 2.77830000  | -1.21905800 | -0.70640500 |
| H  | 3.34155200  | -1.81299700 | -1.43789300 |
| H  | 1.74460900  | -1.16936200 | -1.07754800 |
| C  | 4.13941300  | -2.48683500 | 1.14637300  |
| H  | 4.02298300  | -2.80394200 | 2.18839900  |
| H  | 4.44972400  | -3.37109600 | 0.58533000  |
| C  | 1.89863900  | -1.37121400 | 1.65871900  |
| C  | 1.47500200  | -0.53857800 | 3.68626200  |
| C  | 0.35547900  | -0.17386100 | 2.70953300  |
| H  | 1.17672000  | -1.29368900 | 4.42323000  |
| H  | 1.91522400  | 0.31951100  | 4.19677900  |
| H  | 0.42679000  | 0.89025500  | 2.43473600  |
| C  | 1.99958600  | -3.32735600 | 0.15209400  |
| C  | 1.88553200  | -5.29846500 | -0.90757300 |
| C  | 0.47735100  | -4.77804900 | -0.59501600 |
| H  | 2.06355800  | -5.49252700 | -1.96839900 |
| H  | 2.15543000  | -6.17995300 | -0.31981600 |
| H  | -0.08329800 | -5.49800500 | 0.01137500  |
| O  | 2.48967100  | -1.12772800 | 2.83834500  |

|   |             |             |             |
|---|-------------|-------------|-------------|
| N | 0.69958300  | -0.95286700 | 1.49907600  |
| C | -1.04489600 | -0.43235800 | 3.18739600  |
| C | -1.99250800 | 0.58814900  | 3.11681600  |
| C | -1.43418300 | -1.69121400 | 3.65200400  |
| C | -3.31520500 | 0.35927300  | 3.48948600  |
| H | -1.68357900 | 1.57272300  | 2.76282800  |
| C | -2.74984200 | -1.91829500 | 4.04201000  |
| H | -0.70559000 | -2.50168100 | 3.69780800  |
| C | -3.69475100 | -0.89670000 | 3.95522200  |
| H | -4.04579700 | 1.16396900  | 3.41380800  |
| H | -3.04584200 | -2.90174000 | 4.40064000  |
| H | -4.72627200 | -1.08453800 | 4.24574000  |
| N | 0.74053700  | -3.56572000 | 0.21247600  |
| O | 2.75514800  | -4.21615500 | -0.50094800 |
| C | -0.34470500 | -4.41107200 | -1.80298600 |
| C | -1.56799200 | -5.03448200 | -2.03701800 |
| C | 0.09415900  | -3.41772600 | -2.68464400 |
| C | -2.34649500 | -4.67227200 | -3.13519000 |
| H | -1.91810800 | -5.80202700 | -1.34588900 |
| C | -0.68885600 | -3.04319700 | -3.77032600 |
| H | 1.05147300  | -2.92273700 | -2.51480400 |
| C | -1.91370800 | -3.66947700 | -3.99733600 |
| H | -3.29769400 | -5.17110600 | -3.31099300 |
| H | -0.34256500 | -2.25952400 | -4.44091400 |
| H | -2.52463800 | -3.38057700 | -4.84922300 |
| C | 3.34860700  | 0.18029800  | -0.68937600 |
| C | 2.91054500  | 1.17662100  | 0.18521700  |
| C | 4.32140000  | 0.49477100  | -1.63647100 |
| C | 3.50070000  | 2.44000700  | 0.15639600  |
| H | 2.14654400  | 0.99788900  | 0.93575500  |
| C | 4.89277900  | 1.76653800  | -1.67302300 |
| H | 4.69666700  | -0.25974600 | -2.32560500 |
| C | 4.49292800  | 2.75834000  | -0.77510400 |
| H | 4.94406400  | 3.74354100  | -0.79270400 |
| C | 5.24335900  | -1.47006700 | 1.01373200  |
| C | 6.14857900  | -1.61493600 | -0.03478900 |
| C | 5.35764000  | -0.37627500 | 1.86924300  |
| C | 7.11320800  | -0.63608900 | -0.27059400 |
| H | 6.07145300  | -2.45139900 | -0.72790400 |
| C | 6.32666300  | 0.59689200  | 1.62885800  |
| H | 4.66181300  | -0.22625700 | 2.69003500  |
| C | 7.22272700  | 0.47879400  | 0.56220000  |
| H | 7.96580800  | 1.24496200  | 0.37250100  |
| O | 5.86264400  | 1.94697500  | -2.60973500 |

|   |             |             |             |
|---|-------------|-------------|-------------|
| O | 3.05394900  | 3.31728800  | 1.09654000  |
| O | 6.30975300  | 1.66091100  | 2.47856700  |
| O | 7.88624200  | -0.82619700 | -1.37416500 |
| C | 3.72120000  | 4.57179300  | 1.21967700  |
| H | 4.80475700  | 4.40221700  | 1.32593100  |
| H | 3.56418500  | 5.16784500  | 0.30846100  |
| C | 3.16317400  | 5.26454000  | 2.43248000  |
| H | 3.32734600  | 4.66097500  | 3.33233200  |
| H | 3.65651400  | 6.23157000  | 2.57170500  |
| H | 2.08729700  | 5.43928100  | 2.32405300  |
| C | 6.49941200  | 3.22274900  | -2.68114100 |
| H | 7.01849800  | 3.42563000  | -1.73018700 |
| H | 5.74021800  | 4.00549300  | -2.82325000 |
| C | 7.46153300  | 3.19129400  | -3.83700000 |
| H | 6.93510900  | 2.97915800  | -4.77369400 |
| H | 7.95816600  | 4.16158300  | -3.93453000 |
| H | 8.23269500  | 2.42564600  | -3.69197200 |
| C | 8.82120000  | 0.19044100  | -1.72827600 |
| H | 8.30296900  | 1.16003400  | -1.79280700 |
| H | 9.59181100  | 0.27354900  | -0.94736800 |
| C | 9.41683900  | -0.18909900 | -3.05619400 |
| H | 8.63658400  | -0.24826100 | -3.82381700 |
| H | 10.15110000 | 0.56081200  | -3.36755900 |
| H | 9.92066000  | -1.15987400 | -2.99689500 |
| C | 7.17117700  | 2.76380600  | 2.20462600  |
| H | 6.94416400  | 3.16280900  | 1.20119700  |
| H | 8.21928400  | 2.43024300  | 2.20454400  |
| C | 6.93510100  | 3.79600000  | 3.27378900  |
| H | 7.18496300  | 3.39571700  | 4.26221300  |
| H | 7.55941400  | 4.67595800  | 3.09084200  |
| H | 5.88541400  | 4.11429600  | 3.28655500  |

TS<sub>C-D</sub>'

TS<sub>C-D</sub>'  
 Electronic Energy= -5509.233639 Hartree  
 Gibbs Free Energy= -5508.147344 Hartree

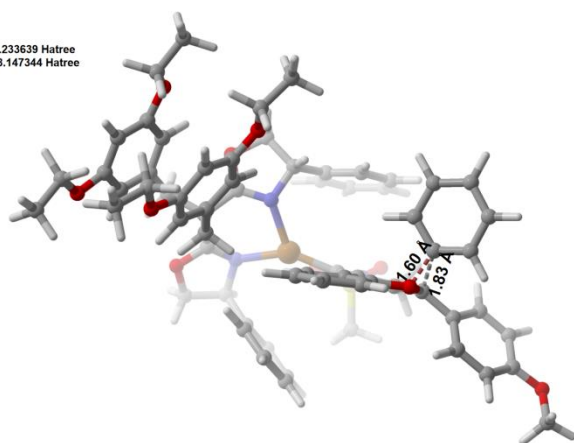

|   |             |             |             |
|---|-------------|-------------|-------------|
| N | 2.52684700  | -0.71592000 | 1.40607100  |
| C | 3.96924400  | -0.68900100 | 1.70581000  |
| H | 4.19277200  | 0.02812000  | 2.50958800  |
| H | 4.33644600  | -1.67563400 | 2.01420200  |
| C | 4.50556500  | -0.26287000 | 0.38697700  |
| C | 5.84635700  | -0.04020400 | 0.08786300  |
| C | 6.83144900  | 0.49648200  | 1.03460100  |
| C | 7.42549700  | 1.75379100  | 0.85620900  |
| C | 7.19328800  | -0.26998600 | 2.14304300  |
| C | 8.33239700  | 2.23553100  | 1.78343600  |
| H | 7.17734200  | 2.35308100  | -0.01734600 |
| C | 8.09582200  | 0.21266400  | 3.08708100  |
| H | 6.77157200  | -1.26593600 | 2.27109700  |
| C | 8.66745800  | 1.47210400  | 2.90769500  |
| H | 8.79773300  | 3.21027800  | 1.65784300  |
| H | 8.35391600  | -0.40542800 | 3.94138900  |
| O | 9.56314500  | 2.03676000  | 3.76055600  |
| C | 9.93699600  | 1.29124000  | 4.90708800  |
| H | 10.64869900 | 1.90963100  | 5.45730400  |
| H | 10.42058400 | 0.34570100  | 4.63014000  |
| H | 9.07134000  | 1.08084200  | 5.54816900  |
| C | 2.21077100  | -0.33246200 | 0.12932700  |
| C | 3.44809500  | -0.12146900 | -0.51706700 |
| C | 3.69401400  | 0.42930700  | -1.84711300 |
| C | 2.72500700  | 0.69295200  | -2.81803800 |
| C | 5.00417100  | 0.77146000  | -2.18450700 |
| C | 3.06124400  | 1.30654100  | -4.02281600 |
| H | 1.69146000  | 0.39970800  | -2.63504800 |
| C | 5.37018900  | 1.40483300  | -3.35173100 |
| C | 4.37314400  | 1.68455300  | -4.28674300 |
| H | 2.28358600  | 1.48959600  | -4.76052400 |

|    |             |             |             |
|----|-------------|-------------|-------------|
| H  | 6.41397100  | 1.64830500  | -3.52941600 |
| H  | 4.63321600  | 2.16788800  | -5.22406900 |
| O  | 6.08688300  | 0.43527600  | -1.31278900 |
| C  | 6.56048400  | -1.09083200 | -1.24834200 |
| C  | 5.75207300  | -2.04655000 | -1.88132000 |
| C  | 7.95772900  | -1.22312200 | -1.20720000 |
| C  | 6.35633000  | -3.21151000 | -2.33761500 |
| H  | 4.67489800  | -1.92295400 | -1.96272000 |
| C  | 8.51878200  | -2.40221000 | -1.67512600 |
| H  | 8.57191800  | -0.43178500 | -0.78666900 |
| C  | 7.73233500  | -3.40793200 | -2.23831000 |
| H  | 5.72438100  | -3.97299900 | -2.79122600 |
| H  | 9.59803200  | -2.52297600 | -1.61193800 |
| H  | 8.18793300  | -4.32012400 | -2.61260200 |
| S  | 1.39966100  | -1.32235200 | 2.50812700  |
| O  | 2.17959000  | -1.66232200 | 3.69492600  |
| O  | 0.61527000  | -2.36776600 | 1.85236200  |
| C  | 0.33564200  | 0.04391600  | 2.85932600  |
| H  | 0.92851200  | 0.83107500  | 3.33264300  |
| H  | -0.43465400 | -0.32751200 | 3.54263600  |
| H  | -0.11551700 | 0.39033400  | 1.92199200  |
| Cu | 0.47167000  | 0.10400000  | -0.53384600 |
| C  | -2.80975000 | 1.22480100  | -0.85000100 |
| C  | -3.89762400 | 1.77933600  | -1.83919800 |
| H  | -3.77954100 | 1.25339800  | -2.79193400 |
| H  | -3.65993700 | 2.82747500  | -2.03726100 |
| C  | -3.22535000 | 1.17292200  | 0.67847800  |
| H  | -3.86060200 | 2.04338300  | 0.87504200  |
| H  | -2.29783600 | 1.30848600  | 1.25442200  |
| C  | -1.64661100 | 2.19415800  | -0.87405300 |
| C  | -0.79044000 | 4.22704800  | -0.49450900 |
| C  | 0.29756500  | 3.27731300  | -1.00649100 |
| H  | -0.66862000 | 4.48852800  | 0.56300800  |
| H  | -0.89640300 | 5.13734400  | -1.08676600 |
| H  | 0.57901900  | 3.52827500  | -2.03893600 |
| C  | -2.40263300 | -0.16805300 | -1.25820300 |
| C  | -2.76531300 | -2.23007400 | -2.06260000 |
| C  | -1.36370100 | -2.14107200 | -1.44342700 |
| H  | -2.76285600 | -2.40353500 | -3.14343300 |
| H  | -3.40357000 | -2.96960300 | -1.57337000 |
| H  | -1.30303300 | -2.75656300 | -0.53327900 |
| O  | -2.01163500 | 3.46171200  | -0.62027600 |
| N  | -0.39897800 | 1.96819800  | -1.05429200 |
| C  | 1.54883500  | 3.23704300  | -0.17153700 |

|   |             |             |             |
|---|-------------|-------------|-------------|
| C | 2.79385400  | 3.47147800  | -0.75524700 |
| C | 1.48553700  | 2.92775600  | 1.19057500  |
| C | 3.95887200  | 3.39308400  | 0.00499700  |
| H | 2.85176700  | 3.70802400  | -1.81796000 |
| C | 2.64722400  | 2.84064300  | 1.95048500  |
| H | 0.51564300  | 2.74239400  | 1.65558900  |
| C | 3.88898800  | 3.06978200  | 1.35728700  |
| H | 4.92352800  | 3.57813300  | -0.46537200 |
| H | 2.58562000  | 2.59205100  | 3.00884800  |
| H | 4.80018700  | 3.00022900  | 1.95000100  |
| N | -1.28002500 | -0.73017500 | -1.02559100 |
| O | -3.34925500 | -0.92248700 | -1.82462300 |
| C | -0.17896100 | -2.45971300 | -2.31926700 |
| C | -0.06727900 | -1.92451100 | -3.60523600 |
| C | 0.89460400  | -3.17149700 | -1.78286200 |
| C | 1.10287900  | -2.09549200 | -4.33870600 |
| H | -0.89430200 | -1.35209800 | -4.02707100 |
| C | 2.07112800  | -3.33457600 | -2.51075800 |
| H | 0.81215700  | -3.58054000 | -0.77584600 |
| C | 2.17852800  | -2.79258400 | -3.78897000 |
| H | 1.18234700  | -1.67104600 | -5.33722500 |
| H | 2.90544800  | -3.88345200 | -2.07723900 |
| H | 3.10034300  | -2.91302200 | -4.35510400 |
| C | -5.33280000 | 1.71864400  | -1.39588400 |
| C | -5.87273600 | 2.80757500  | -0.71254900 |
| C | -6.12464400 | 0.60377700  | -1.65262900 |
| C | -7.19855100 | 2.77357500  | -0.27764100 |
| H | -5.27265000 | 3.69487300  | -0.51424500 |
| C | -7.43656300 | 0.56121300  | -1.18160500 |
| H | -5.72151400 | -0.26429300 | -2.16795600 |
| C | -7.99635300 | 1.64829500  | -0.50402000 |
| H | -9.02401100 | 1.62055400  | -0.16098400 |
| C | -3.88548100 | -0.09599600 | 1.15493400  |
| C | -3.09201600 | -1.20007400 | 1.46922900  |
| C | -5.26829900 | -0.18812400 | 1.29301300  |
| C | -3.68365800 | -2.40521000 | 1.84447500  |
| H | -2.00592500 | -1.14927700 | 1.41168600  |
| C | -5.85501500 | -1.39526700 | 1.67514000  |
| H | -5.91158400 | 0.66760900  | 1.10700200  |
| C | -5.07227400 | -2.52243900 | 1.94278800  |
| H | -5.52984200 | -3.46335100 | 2.22532300  |
| O | -8.10273200 | -0.60181300 | -1.40638100 |
| O | -7.63973800 | 3.88875200  | 0.36153900  |
| O | -7.21406400 | -1.39381800 | 1.76119000  |



|   |              |             |             |
|---|--------------|-------------|-------------|
| O | -2.82079200  | -3.42503300 | 2.09578000  |
| C | -8.97949000  | 3.90571600  | 0.85407500  |
| H | -9.12037600  | 3.07787000  | 1.56469900  |
| H | -9.68107500  | 3.75662000  | 0.02028400  |
| C | -9.19808800  | 5.23770200  | 1.51809800  |
| H | -8.49814600  | 5.37829600  | 2.34864100  |
| H | -10.21687100 | 5.29634700  | 1.91309500  |
| H | -9.05840500  | 6.05619200  | 0.80389400  |
| C | -9.42910000  | -0.72972900 | -0.89940400 |
| H | -9.43564300  | -0.48180800 | 0.17292400  |
| H | -10.09166000 | -0.01655700 | -1.41204100 |
| C | -9.86233700  | -2.15163300 | -1.12871400 |
| H | -9.84655200  | -2.39884500 | -2.19562400 |
| H | -10.88101100 | -2.29989800 | -0.75613500 |
| H | -9.19652900  | -2.84606900 | -0.60178000 |
| C | -3.34925200  | -4.69073400 | 2.48887200  |
| H | -4.02588100  | -5.06738600 | 1.70749300  |
| H | -3.93320900  | -4.57487300 | 3.41387500  |
| C | -2.18069700  | -5.61654000 | 2.69087000  |
| H | -1.61117200  | -5.73085400 | 1.76192800  |
| H | -2.53205100  | -6.60463900 | 3.00318900  |
| H | -1.50790300  | -5.22886100 | 3.46348800  |
| C | -7.84118600  | -2.52957500 | 2.36279100  |
| H | -7.72668300  | -3.40623600 | 1.70759000  |
| H | -7.33989400  | -2.75527700 | 3.31522100  |
| C | -9.29184000  | -2.20448600 | 2.59226500  |
| H | -9.39405400  | -1.30211700 | 3.20470500  |
| H | -9.77487300  | -3.03325900 | 3.11943800  |
| H | -9.82563000  | -2.04928600 | 1.64832000  |

D'

D'

Electronic Energy= -5509.366273 Hartree  
Gibbs Free Energy= -5508.278499 Hartree

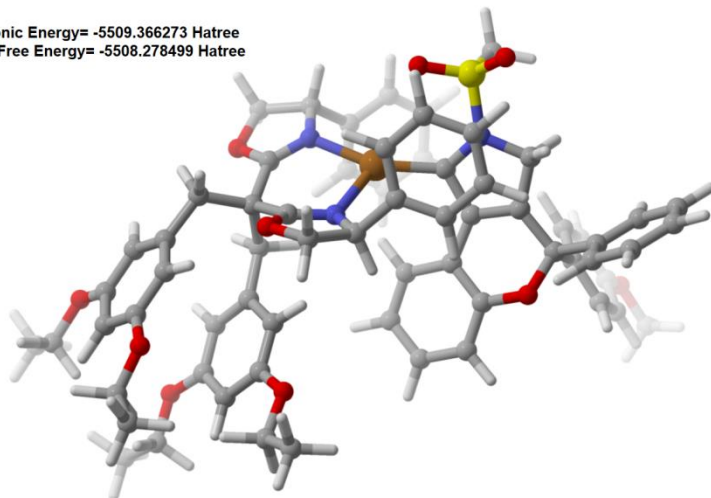

|   |            |             |             |
|---|------------|-------------|-------------|
| N | 3.90966600 | -1.80074800 | -0.56448000 |
| C | 4.99400900 | -0.82334800 | -0.77111600 |
| H | 5.29751000 | -0.80931000 | -1.82831300 |
| H | 5.88044700 | -1.06757600 | -0.16530900 |
| C | 4.31107700 | 0.41431200  | -0.34947400 |
| C | 4.84067700 | 1.81832200  | -0.33181100 |
| C | 5.39914000 | 2.20112700  | 1.03153900  |
| C | 5.56026100 | 1.28651200  | 2.07381300  |
| C | 5.76207800 | 3.53092700  | 1.24676800  |
| C | 6.07493900 | 1.69128500  | 3.29678300  |
| H | 5.28112700 | 0.24182000  | 1.94255500  |
| C | 6.27113600 | 3.95396200  | 2.46812700  |
| H | 5.64198600 | 4.25453300  | 0.44171100  |
| C | 6.43200400 | 3.02577700  | 3.50076700  |
| H | 6.20429800 | 0.98432800  | 4.11286000  |
| H | 6.54009800 | 4.99703200  | 2.60405800  |
| O | 6.92511700 | 3.32906600  | 4.72994800  |
| C | 7.29881300 | 4.67495200  | 4.97540700  |
| H | 7.66505400 | 4.70912200  | 6.00316900  |
| H | 8.09868200 | 4.99886700  | 4.29753100  |
| H | 6.44224700 | 5.35362100  | 4.87617400  |
| C | 2.75612400 | -1.27961700 | -0.11934300 |
| C | 3.04119500 | 0.13931600  | 0.03389300  |
| C | 2.14271200 | 1.21535200  | 0.41614900  |
| C | 0.91472800 | 1.06291800  | 1.06399200  |
| C | 2.55625500 | 2.50421300  | 0.03958700  |

|    |             |             |             |
|----|-------------|-------------|-------------|
| C  | 0.10211100  | 2.16490900  | 1.30433300  |
| H  | 0.60119800  | 0.06516800  | 1.37256000  |
| C  | 1.74530000  | 3.60876600  | 0.26823800  |
| C  | 0.51593000  | 3.43290000  | 0.89628500  |
| H  | -0.85316900 | 2.03649900  | 1.80894500  |
| H  | 2.08819300  | 4.59057700  | -0.04868500 |
| H  | -0.11739300 | 4.29730000  | 1.08053700  |
| O  | 3.73031800  | 2.69825700  | -0.63857700 |
| C  | 5.85062600  | 1.99933700  | -1.45572600 |
| C  | 7.19638700  | 1.70249800  | -1.23314800 |
| C  | 5.43040700  | 2.34819800  | -2.74012500 |
| C  | 8.11182500  | 1.76497300  | -2.27900700 |
| H  | 7.53028500  | 1.41936800  | -0.23603500 |
| C  | 6.35013400  | 2.41834400  | -3.78284000 |
| H  | 4.38222800  | 2.57037000  | -2.92561600 |
| C  | 7.69202400  | 2.12656600  | -3.55582200 |
| H  | 9.15784700  | 1.53406200  | -2.09223700 |
| H  | 6.01293900  | 2.70081800  | -4.77755000 |
| H  | 8.40847500  | 2.18015000  | -4.37203300 |
| S  | 4.18862300  | -3.47522900 | -0.85349700 |
| O  | 2.89065400  | -4.13382600 | -0.87604400 |
| O  | 5.06594100  | -3.54015700 | -2.01484300 |
| C  | 5.09156500  | -3.94758500 | 0.58763500  |
| H  | 4.49874700  | -3.68879200 | 1.46909100  |
| H  | 5.25167300  | -5.02806400 | 0.52713200  |
| H  | 6.04830800  | -3.41904400 | 0.58713400  |
| Cu | 0.97714200  | -1.98561100 | -0.07375200 |
| C  | -2.53686700 | -2.01808900 | -0.01874600 |
| C  | -2.69688400 | -0.89475200 | 1.07632500  |
| H  | -3.18730200 | -1.36737400 | 1.93538600  |
| H  | -1.67464500 | -0.63860800 | 1.39691000  |
| C  | -3.86671000 | -2.70549300 | -0.46937700 |
| H  | -3.68935200 | -3.15656500 | -1.45215000 |
| H  | -4.05352500 | -3.53149400 | 0.22136900  |
| C  | -1.77874000 | -1.43431900 | -1.19221600 |
| C  | -1.58004000 | -0.59029900 | -3.25815400 |
| C  | -0.29559000 | -0.33980900 | -2.44867300 |
| H  | -1.43642700 | -1.25486700 | -4.11592900 |
| H  | -2.07380700 | 0.32936400  | -3.58337400 |
| H  | -0.17434800 | 0.73332000  | -2.23375600 |
| C  | -1.69265600 | -3.04803900 | 0.71264000  |
| C  | -1.40148400 | -4.57372500 | 2.33183000  |
| C  | -0.05142100 | -4.17618700 | 1.72528900  |
| H  | -1.47469800 | -4.39785400 | 3.40834700  |

|   |             |             |             |
|---|-------------|-------------|-------------|
| H | -1.68308300 | -5.60545100 | 2.10645000  |
| H | 0.47342200  | -5.04899600 | 1.32153100  |
| O | -2.46608300 | -1.25598500 | -2.32477200 |
| N | -0.57093400 | -1.01353000 | -1.16560900 |
| C | 0.97567600  | -0.84442500 | -3.07502700 |
| C | 2.05723900  | 0.01457800  | -3.26657200 |
| C | 1.10133500  | -2.19239000 | -3.42470200 |
| C | 3.24816700  | -0.46199500 | -3.81131200 |
| H | 1.96516700  | 1.06404700  | -2.98340400 |
| C | 2.29075100  | -2.67063800 | -3.96176400 |
| H | 0.26123000  | -2.87021300 | -3.26557400 |
| C | 3.36625100  | -1.80460200 | -4.15721200 |
| H | 4.08656200  | 0.21790600  | -3.96036000 |
| H | 2.38370000  | -3.72211800 | -4.22509300 |
| H | 4.29755300  | -2.18016000 | -4.57490600 |
| N | -0.43573800 | -3.28172300 | 0.60740200  |
| O | -2.35236900 | -3.70347500 | 1.67411200  |
| C | 0.87864100  | -3.42039300 | 2.63865700  |
| C | 2.19890300  | -3.83441300 | 2.80329000  |
| C | 0.45265900  | -2.23919700 | 3.25429900  |
| C | 3.08721800  | -3.07328700 | 3.56184200  |
| H | 2.53463400  | -4.75415400 | 2.32220800  |
| C | 1.34102800  | -1.47189000 | 3.99932400  |
| H | -0.57945900 | -1.90606100 | 3.13539300  |
| C | 2.66414500  | -1.88427000 | 4.14882900  |
| H | 4.11379700  | -3.41019000 | 3.69420000  |
| H | 1.00095400  | -0.54838800 | 4.46272200  |
| H | 3.36027800  | -1.28508400 | 4.73128200  |
| C | -3.43711500 | 0.37741100  | 0.74359700  |
| C | -3.06145800 | 1.21649500  | -0.30734000 |
| C | -4.50977500 | 0.74471700  | 1.55201900  |
| C | -3.82331100 | 2.34578600  | -0.60407100 |
| H | -2.19633700 | 1.01219200  | -0.93137900 |
| C | -5.24400400 | 1.89738700  | 1.27475400  |
| H | -4.82837900 | 0.11518300  | 2.38070600  |
| C | -4.92053900 | 2.70716200  | 0.18379200  |
| H | -5.50372600 | 3.59090900  | -0.04781400 |
| C | -5.11138900 | -1.85555100 | -0.49453500 |
| C | -5.97325500 | -1.90676900 | 0.59837200  |
| C | -5.40627700 | -1.00487500 | -1.55774400 |
| C | -7.08244000 | -1.06289600 | 0.65739000  |
| H | -5.75731300 | -2.55109200 | 1.44983000  |
| C | -6.51632300 | -0.16481500 | -1.49163900 |
| H | -4.75324900 | -0.93538500 | -2.42222000 |

|   |              |             |             |
|---|--------------|-------------|-------------|
| C | -7.37630800  | -0.18800500 | -0.39042900 |
| H | -8.23465500  | 0.47242400  | -0.34457300 |
| O | -6.28423600  | 2.14323400  | 2.11558600  |
| O | -3.43219000  | 3.04766800  | -1.70316800 |
| O | -6.67544200  | 0.67613800  | -2.55125800 |
| O | -7.80872700  | -1.12513100 | 1.80669700  |
| C | -4.29677400  | 4.07561600  | -2.18495200 |
| H | -5.32331500  | 3.68289700  | -2.25972800 |
| H | -4.31047700  | 4.91478700  | -1.47366800 |
| C | -3.78631300  | 4.50493100  | -3.53291000 |
| H | -3.78797100  | 3.66188200  | -4.23303700 |
| H | -4.42633500  | 5.29332400  | -3.94143200 |
| H | -2.76493900  | 4.89388900  | -3.46055600 |
| C | -7.07769200  | 3.30799200  | 1.88802300  |
| H | -7.59495600  | 3.21304000  | 0.91947600  |
| H | -6.42730600  | 4.19317500  | 1.83813200  |
| C | -8.05351600  | 3.42899100  | 3.02688500  |
| H | -7.52423300  | 3.51940200  | 3.98149400  |
| H | -8.67315700  | 4.32091800  | 2.89215500  |
| H | -8.71650900  | 2.55752400  | 3.08026800  |
| C | -8.91062300  | -0.23252600 | 1.95802500  |
| H | -8.58346300  | 0.79523100  | 1.74068400  |
| H | -9.69829700  | -0.49273500 | 1.23520800  |
| C | -9.39555900  | -0.34781900 | 3.37688400  |
| H | -8.60373800  | -0.05641700 | 4.07663600  |
| H | -10.25468100 | 0.31203500  | 3.53483700  |
| H | -9.70278000  | -1.37390200 | 3.60597400  |
| C | -7.66704500  | 1.69721100  | -2.46703200 |
| H | -7.45920000  | 2.33299100  | -1.58929800 |
| H | -8.66097800  | 1.24706200  | -2.32886800 |
| C | -7.61113200  | 2.48704000  | -3.74690900 |
| H | -7.83937400  | 1.84836800  | -4.60698500 |
| H | -8.34312800  | 3.29997700  | -3.71851100 |
| H | -6.61621300  | 2.92391300  | -3.89803000 |

TS'\_D

TS'\_D

Electronic Energy= -5585.776898 Hartree  
Gibbs Free Energy= -5584.666239 Hartree

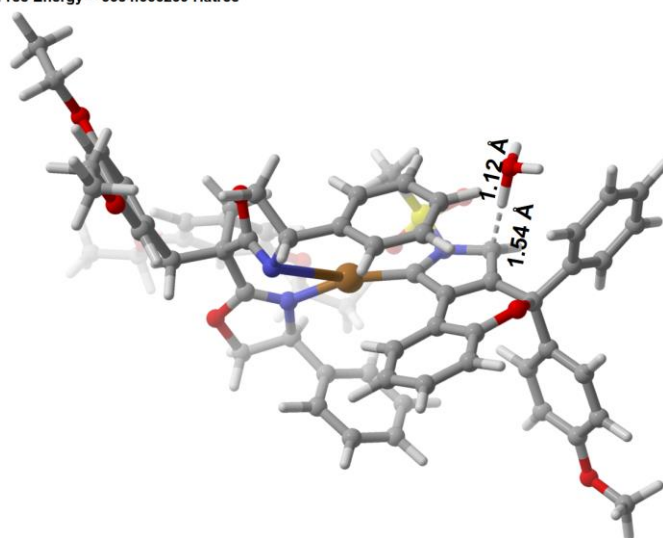

|   |            |             |             |
|---|------------|-------------|-------------|
| N | 2.54887900 | 0.78448900  | 1.77813700  |
| C | 3.86598100 | 0.31062200  | 2.06049900  |
| H | 3.72013100 | -0.74202800 | 3.17042200  |
| H | 4.54924600 | 0.94775100  | 2.62018600  |
| C | 4.16883600 | -0.46381200 | 0.93551800  |
| C | 5.44015500 | -1.15940800 | 0.54357500  |
| C | 6.16666800 | -1.62883000 | 1.79226800  |
| C | 5.94298100 | -2.90499700 | 2.31467700  |
| C | 6.95899200 | -0.72839800 | 2.50621400  |
| C | 6.50610000 | -3.27139900 | 3.53646200  |
| H | 5.32390700 | -3.61303900 | 1.76930000  |
| C | 7.51140000 | -1.09253800 | 3.73039500  |
| H | 7.13531100 | 0.26892700  | 2.10517500  |
| C | 7.28624200 | -2.36383600 | 4.25052200  |
| H | 6.33269800 | -4.27056300 | 3.92914500  |
| H | 8.12242500 | -0.37897300 | 4.27785900  |
| C | 2.00143900 | 0.23692100  | 0.64440400  |
| C | 3.04995500 | -0.52242700 | 0.09870000  |
| C | 3.10453300 | -1.32671000 | -1.11052200 |
| C | 2.17871600 | -1.27563200 | -2.15305900 |
| C | 4.17135700 | -2.23349500 | -1.20688500 |
| C | 2.28786900 | -2.12824100 | -3.24625100 |
| H | 1.36961100 | -0.54519300 | -2.09747400 |
| C | 4.28915900 | -3.09133400 | -2.29376100 |
| C | 3.33825900 | -3.04357200 | -3.30989700 |
| H | 1.55789900 | -2.07261200 | -4.05124900 |
| H | 5.12391500 | -3.78781500 | -2.32695100 |

|    |             |             |             |
|----|-------------|-------------|-------------|
| H  | 3.43026700  | -3.71276800 | -4.16200400 |
| O  | 5.08640700  | -2.35772900 | -0.19147900 |
| C  | 6.30087300  | -0.28867300 | -0.36281500 |
| C  | 5.95042900  | 1.01259600  | -0.73069200 |
| C  | 7.46910600  | -0.83834200 | -0.89174300 |
| C  | 6.74860900  | 1.74180900  | -1.60040700 |
| H  | 5.04231800  | 1.47182100  | -0.34019300 |
| C  | 8.27882200  | -0.12242400 | -1.76484300 |
| H  | 7.75209700  | -1.85410800 | -0.61832500 |
| C  | 7.91547000  | 1.17888600  | -2.12231500 |
| H  | 6.48283400  | 2.75633400  | -1.88988200 |
| H  | 9.18033300  | -0.58198000 | -2.15870000 |
| S  | 1.66458800  | 1.77359900  | 2.84032600  |
| O  | 2.58003000  | 2.09964000  | 3.92906700  |
| O  | 1.07648000  | 2.85401100  | 2.05251900  |
| C  | 0.37878100  | 0.71377300  | 3.42847000  |
| H  | 0.83942300  | -0.09373600 | 4.00522900  |
| H  | -0.27117900 | 1.32196000  | 4.06468400  |
| H  | -0.17465300 | 0.32727700  | 2.56539400  |
| Cu | 0.23958400  | 0.46877300  | -0.05773700 |
| C  | -3.37669800 | 0.01318500  | -0.61196800 |
| C  | -4.69200700 | -0.11155900 | -1.44182600 |
| H  | -5.19353000 | 0.86205000  | -1.40376300 |
| H  | -4.40185500 | -0.28611700 | -2.48540500 |
| C  | -3.63476200 | 0.55504500  | 0.84073400  |
| H  | -4.53482400 | 0.06034400  | 1.22229700  |
| H  | -2.79281900 | 0.23455900  | 1.46826200  |
| C  | -2.73969400 | -1.34700400 | -0.49450600 |
| C  | -2.81107600 | -3.45291800 | 0.20755900  |
| C  | -1.56194400 | -3.20585100 | -0.64090900 |
| H  | -2.62054100 | -3.93679200 | 1.16833700  |
| H  | -3.58464800 | -4.00678600 | -0.34044700 |
| H  | -1.50444300 | -3.92125500 | -1.46778800 |
| C  | -2.47133000 | 1.01279600  | -1.29526300 |
| C  | -2.08391000 | 2.82472700  | -2.56476500 |
| C  | -0.84426600 | 2.48907200  | -1.73546600 |
| H  | -1.95482900 | 2.66263900  | -3.64015900 |
| H  | -2.46162000 | 3.83503900  | -2.39059700 |
| H  | -0.71544600 | 3.22445500  | -0.92388500 |
| O  | -3.31291800 | -2.12479700 | 0.45523900  |
| N  | -1.79617300 | -1.84742200 | -1.19468800 |
| C  | -0.27805700 | -3.27747100 | 0.15081000  |
| C  | 0.79538600  | -4.04260400 | -0.30484600 |
| C  | -0.16163800 | -2.61522500 | 1.37917500  |

|   |             |             |             |
|---|-------------|-------------|-------------|
| C | 1.96309000  | -4.15193500 | 0.44963600  |
| H | 0.71145900  | -4.56302200 | -1.25870200 |
| C | 0.99681000  | -2.73440200 | 2.13955300  |
| H | -0.99237100 | -2.01591100 | 1.75597900  |
| C | 2.06353400  | -3.50249500 | 1.67655600  |
| H | 2.79438800  | -4.74955000 | 0.07904100  |
| H | 1.06971700  | -2.22411000 | 3.09860200  |
| H | 2.97162600  | -3.58944100 | 2.27262700  |
| N | -1.22317700 | 1.20909800  | -1.08401200 |
| O | -3.08431900 | 1.89116200  | -2.09399500 |
| C | 0.46437000  | 2.36196800  | -2.47131600 |
| C | 1.62264200  | 2.88143600  | -1.88922000 |
| C | 0.56685700  | 1.64852100  | -3.66749500 |
| C | 2.86614200  | 2.68430700  | -2.48346600 |
| H | 1.54535100  | 3.43121200  | -0.95050000 |
| C | 1.80775200  | 1.46075700  | -4.26990300 |
| H | -0.32519900 | 1.22062600  | -4.12499300 |
| C | 2.96066600  | 1.97067600  | -3.67549200 |
| H | 3.76100700  | 3.09145900  | -2.01629400 |
| H | 1.87656600  | 0.89978400  | -5.19934700 |
| H | 3.93252200  | 1.81220500  | -4.13827400 |
| C | -5.64779900 | -1.18889200 | -1.01373700 |
| C | -5.56220700 | -2.45505700 | -1.58909900 |
| C | -6.62514800 | -0.93282100 | -0.05397700 |
| C | -6.42248000 | -3.47081400 | -1.17301600 |
| H | -4.81359900 | -2.67627600 | -2.34887800 |
| C | -7.49314800 | -1.95070400 | 0.34620200  |
| H | -6.73578100 | 0.05552000  | 0.38907400  |
| C | -7.39936100 | -3.23230000 | -0.20213900 |
| H | -8.07189100 | -4.02156600 | 0.11299100  |
| C | -3.74959800 | 2.05098600  | 0.91363800  |
| C | -2.59696800 | 2.79061800  | 1.17188000  |
| C | -4.94027400 | 2.71310900  | 0.62219100  |
| C | -2.61482600 | 4.17819600  | 1.05903300  |
| H | -1.65269900 | 2.29614300  | 1.39915600  |
| C | -4.95844600 | 4.10844200  | 0.54508900  |
| H | -5.86230300 | 2.16591500  | 0.43316500  |
| C | -3.79379600 | 4.85746300  | 0.74192000  |
| H | -3.80462400 | 5.93932300  | 0.66660900  |
| O | -8.41200200 | -1.60340700 | 1.28547600  |
| O | -6.23673900 | -4.67938700 | -1.76758400 |
| O | -6.16514300 | 4.66293100  | 0.25814900  |
| O | -1.42149100 | 4.79389800  | 1.26548200  |
| C | -7.09573900 | -5.75858100 | -1.39935100 |



|   |              |             |             |
|---|--------------|-------------|-------------|
| H | -7.00403400  | -5.95093800 | -0.32026400 |
| H | -8.14075000  | -5.48370600 | -1.60479700 |
| C | -6.67921200  | -6.95974500 | -2.20340700 |
| H | -5.63809400  | -7.22686800 | -1.99287600 |
| H | -7.31157200  | -7.81651000 | -1.95150100 |
| H | -6.77702900  | -6.76320800 | -3.27638600 |
| C | -9.33359000  | -2.59533300 | 1.73721300  |
| H | -8.78095200  | -3.44247100 | 2.16938100  |
| H | -9.91555200  | -2.97333100 | 0.88373300  |
| C | -10.22556700 | -1.94813200 | 2.76112000  |
| H | -10.77455700 | -1.10760900 | 2.32342100  |
| H | -10.95195400 | -2.67473700 | 3.13765200  |
| H | -9.63965700  | -1.57663700 | 3.60860500  |
| C | -1.24205800  | 6.11970800  | 0.76767000  |
| H | -1.61470500  | 6.17001000  | -0.26700200 |
| H | -1.82358700  | 6.83044900  | 1.37271900  |
| C | 0.23131400   | 6.41728900  | 0.83367300  |
| H | 0.79404600   | 5.71010900  | 0.21218500  |
| H | 0.43044900   | 7.43064300  | 0.47196200  |
| H | 0.59772300   | 6.34011500  | 1.86320000  |
| C | -6.25558000  | 6.08343700  | 0.15011200  |
| H | -5.57794800  | 6.43669100  | -0.64104800 |
| H | -5.93895900  | 6.54609900  | 1.09654700  |
| C | -7.68680300  | 6.41974100  | -0.16828000 |
| H | -8.35509800  | 6.06720300  | 0.62454400  |
| H | -7.80493400  | 7.50364100  | -0.26095600 |
| H | -7.99436100  | 5.95798500  | -1.11256500 |
| O | 3.59767000   | -1.45541000 | 4.02572600  |
| H | 3.59021400   | -0.94548100 | 4.85626500  |
| H | 4.38956700   | -2.03235700 | 4.04626300  |
| H | 7.71997500   | -2.64919800 | 5.20572300  |
| O | 8.63106100   | 1.96799200  | -2.96647800 |
| C | 9.82184500   | 1.43107600  | -3.51812800 |
| H | 9.61611800   | 0.54049000  | -4.12556400 |
| H | 10.24333700  | 2.21006900  | -4.15627200 |
| H | 10.54683400  | 1.17591800  | -2.73477200 |

2a'

2a'

Electronic Energy= -1718.710625 Hartree  
Gibbs Free Energy= -1718.710625 Hartree

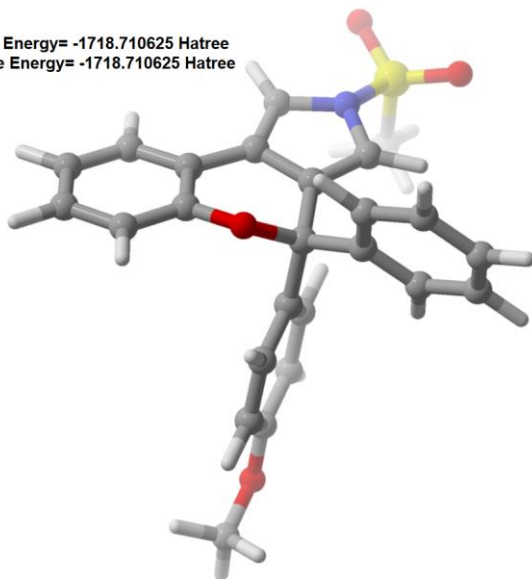

|   |             |             |             |
|---|-------------|-------------|-------------|
| N | -2.94591800 | 0.32038200  | 0.22177700  |
| C | -1.96471900 | -0.66539800 | 0.10106000  |
| H | -2.14530800 | -1.67590300 | 0.44604600  |
| C | -0.88927800 | -0.07863900 | -0.48891000 |
| C | 0.47642400  | -0.59812900 | -0.82304400 |
| C | 0.42369300  | -2.07680900 | -1.16694500 |
| C | 0.18678400  | -2.49961000 | -2.47568800 |
| C | 0.52490600  | -3.02956700 | -0.15143500 |
| C | 0.07683900  | -3.85622200 | -2.76575100 |
| H | 0.09220400  | -1.76510500 | -3.27088900 |
| C | 0.40073000  | -4.38485600 | -0.44128200 |
| H | 0.70228900  | -2.70923200 | 0.87410700  |
| C | 0.18290100  | -4.80289700 | -1.75078700 |
| H | -0.09637500 | -4.17331800 | -3.79165400 |
| H | 0.48232300  | -5.11568900 | 0.35996900  |
| C | -2.44720000 | 1.54120200  | -0.23215800 |
| C | -1.18503800 | 1.30592100  | -0.70398000 |
| C | -0.20542100 | 2.13682200  | -1.37979500 |
| C | -0.25107800 | 3.53080000  | -1.45868000 |
| C | 0.85219400  | 1.45896700  | -2.01085500 |
| C | 0.72525500  | 4.23419500  | -2.15252500 |
| H | -1.06563600 | 4.05879600  | -0.96526500 |
| C | 1.83493500  | 2.15866000  | -2.70178800 |
| C | 1.76614800  | 3.54573900  | -2.77544600 |
| H | 0.67835900  | 5.31881900  | -2.20584000 |
| H | 2.64039900  | 1.60186600  | -3.17537800 |

|   |             |             |             |
|---|-------------|-------------|-------------|
| H | 2.53630100  | 4.09223100  | -3.31439600 |
| O | 0.92377600  | 0.08884800  | -2.01991800 |
| C | 1.48210800  | -0.30182400 | 0.28637400  |
| C | 1.10308600  | 0.06374400  | 1.57927100  |
| C | 2.84276900  | -0.42377400 | 0.00273100  |
| C | 2.05725400  | 0.29997100  | 2.55847300  |
| H | 0.04797900  | 0.16853100  | 1.83035400  |
| C | 3.81201100  | -0.18581200 | 0.97031200  |
| H | 3.15504500  | -0.70930100 | -1.00093700 |
| C | 3.41570800  | 0.17890800  | 2.25937300  |
| H | 1.76800000  | 0.58611200  | 3.56702300  |
| H | 4.86215300  | -0.28651400 | 0.71291800  |
| S | -4.19511400 | 0.21147400  | 1.36448600  |
| O | -5.12337600 | 1.28894800  | 1.05180600  |
| O | -4.64498300 | -1.17353000 | 1.34239500  |
| C | -3.36298300 | 0.55026800  | 2.88621700  |
| H | -2.90100100 | 1.53864000  | 2.81075700  |
| H | -4.11081900 | 0.53263100  | 3.68432700  |
| H | -2.61043300 | -0.22712000 | 3.04564300  |
| H | -3.06567000 | 2.42933300  | -0.22140000 |
| H | 0.09473700  | -5.86241800 | -1.97939200 |
| O | 4.27630700  | 0.43509300  | 3.28117900  |
| C | 5.66409100  | 0.32419700  | 3.01421900  |
| H | 5.98075000  | 1.02935600  | 2.23509200  |
| H | 6.17725600  | 0.56736000  | 3.94664400  |
| H | 5.93420100  | -0.69533500 | 2.71059000  |

(+)-**2a**: IB, *n*-hexane/2-propanol = 90/10,  $v = 1.0 \text{ mL min}^{-1}$ ,  $\lambda = 254 \text{ nm}$

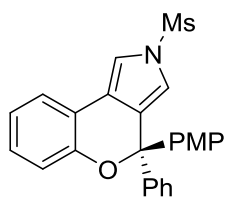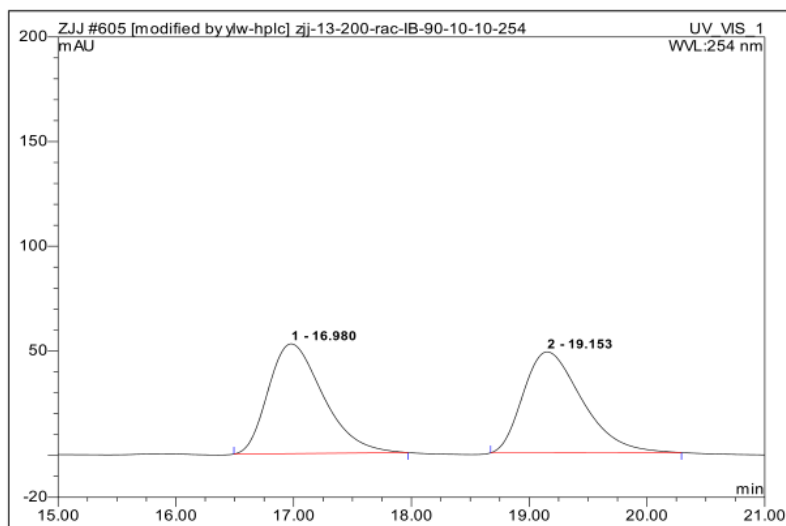

| No.           | Ret.Time<br>min | Peak Name | Height<br>mAU | Area<br>mAU*min | Rel.Area<br>% | Amount<br>n.a. | Type |
|---------------|-----------------|-----------|---------------|-----------------|---------------|----------------|------|
| 1             | 16.98           | n.a.      | 52.440        | 28.336          | 50.39         | n.a.           | BMB* |
| 2             | 19.15           | n.a.      | 48.211        | 27.897          | 49.61         | n.a.           | BMB* |
| <b>Total:</b> |                 |           | 100.652       | 56.233          | 100.00        | 0.000          |      |

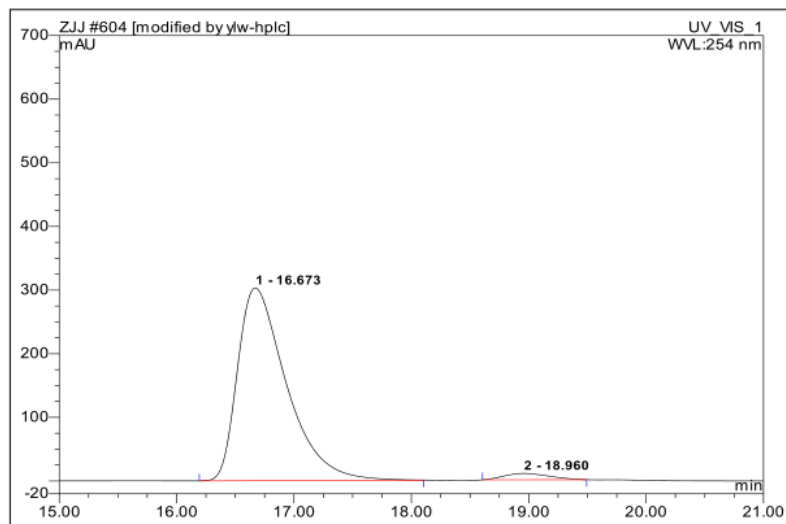

| No.           | Ret.Time<br>min | Peak Name | Height<br>mAU | Area<br>mAU*min | Rel.Area<br>% | Amount<br>n.a. | Type |
|---------------|-----------------|-----------|---------------|-----------------|---------------|----------------|------|
| 1             | 16.67           | n.a.      | 302.792       | 145.986         | 97.10         | n.a.           | BMB* |
| 2             | 18.96           | n.a.      | 9.877         | 4.359           | 2.90          | n.a.           | BMB* |
| <b>Total:</b> |                 |           | 312.669       | 150.345         | 100.00        | 0.000          |      |

(-)-2a: IB, *n*-hexane/2-propanol = 90/10,  $v = 1.0 \text{ mL min}^{-1}$ ,  $\lambda = 254 \text{ nm}$

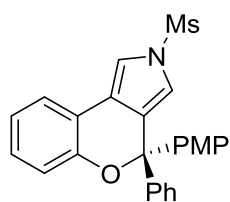

| No.           | Ret.Time<br>min | Peak Name | Height<br>mAU | Area<br>mAU*min | Rel.Area<br>% | Amount<br>n.a. | Type |
|---------------|-----------------|-----------|---------------|-----------------|---------------|----------------|------|
| 1             | 16.98           | n.a.      | 52.440        | 28.336          | 50.39         | n.a.           | BMB* |
| 2             | 19.15           | n.a.      | 48.211        | 27.897          | 49.61         | n.a.           | BMB* |
| <b>Total:</b> |                 |           | 100.652       | 56.233          | 100.00        | 0.000          |      |

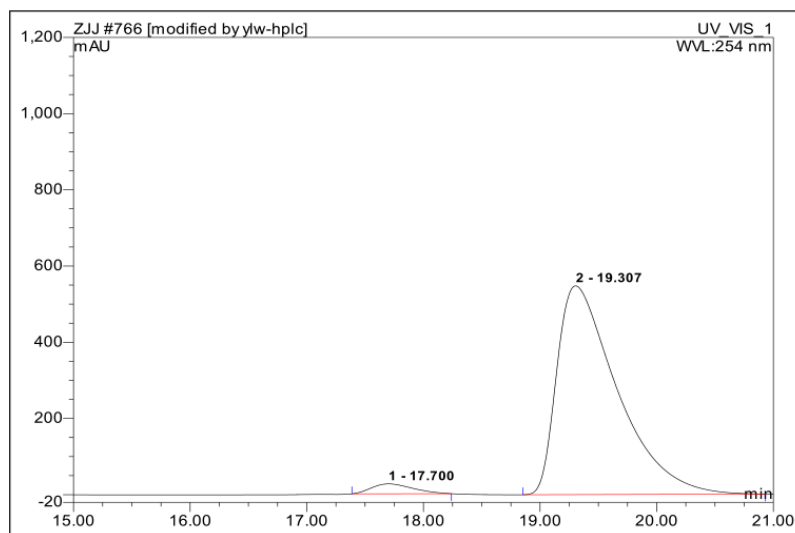

| No.           | Ret.Time<br>min | Peak Name | Height<br>mAU | Area<br>mAU*min | Rel.Area<br>% | Amount<br>n.a. | Type |
|---------------|-----------------|-----------|---------------|-----------------|---------------|----------------|------|
| 1             | 17.70           | n.a.      | 25.991        | 10.602          | 3.13          | n.a.           | BMB* |
| 2             | 19.31           | n.a.      | 547.788       | 328.245         | 96.87         | n.a.           | BMB* |
| <b>Total:</b> |                 |           | 573.779       | 338.847         | 100.00        | 0.000          |      |

(+)-**2b**: IA, *n*-hexane/2-propanol = 90/10,  $v = 1.0 \text{ mL min}^{-1}$ ,  $\lambda = 254 \text{ nm}$

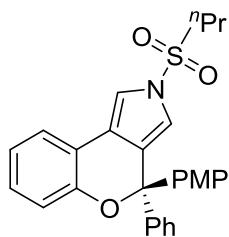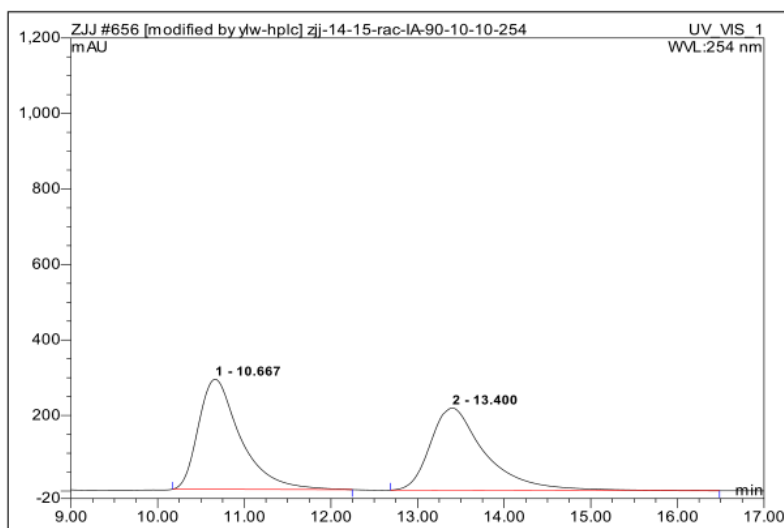

| No.           | Ret.Time<br>min | Peak Name | Height<br>mAU | Area<br>mAU*min | Rel.Area<br>% | Amount<br>n.a. | Type |
|---------------|-----------------|-----------|---------------|-----------------|---------------|----------------|------|
| 1             | 10.67           | n.a.      | 291.577       | 164.271         | 50.68         | n.a.           | BMB* |
| 2             | 13.40           | n.a.      | 218.055       | 159.846         | 49.32         | n.a.           | BMB* |
| <b>Total:</b> |                 |           | 509.631       | 324.117         | 100.00        | 0.000          |      |

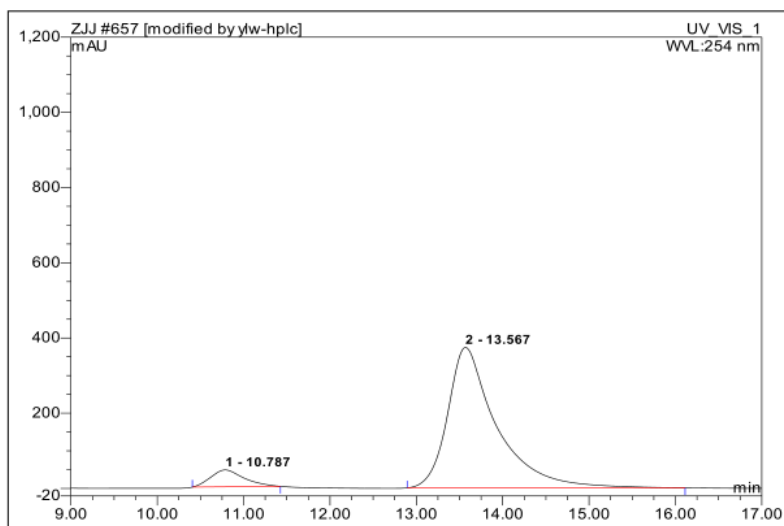

| No.           | Ret.Time<br>min | Peak Name | Height<br>mAU | Area<br>mAU*min | Rel.Area<br>% | Amount<br>n.a. | Type |
|---------------|-----------------|-----------|---------------|-----------------|---------------|----------------|------|
| 1             | 10.79           | n.a.      | 44.860        | 19.995          | 7.54          | n.a.           | BMB* |
| 2             | 13.57           | n.a.      | 373.569       | 245.349         | 92.46         | n.a.           | BMB* |
| <b>Total:</b> |                 |           | 418.429       | 265.344         | 100.00        | 0.000          |      |

(+)-**2c**: IE, *n*-hexane/2-propanol = 98/2,  $v = 1.0 \text{ mL min}^{-1}$ ,  $\lambda = 254 \text{ nm}$

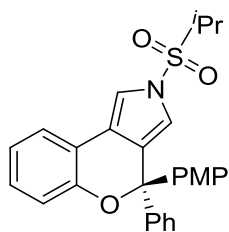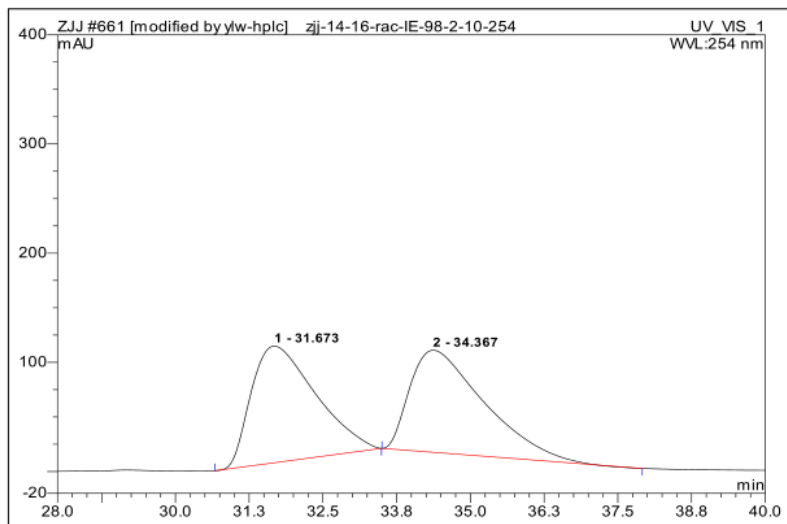

| No.           | Ret.Time<br>min | Peak Name | Height<br>mAU | Area<br>mAU*min | Rel.Area<br>% | Amount<br>n.a. | Type |
|---------------|-----------------|-----------|---------------|-----------------|---------------|----------------|------|
| 1             | 31.67           | n.a.      | 106.941       | 134.765         | 49.65         | n.a.           | BMB* |
| 2             | 34.37           | n.a.      | 93.464        | 136.656         | 50.35         | n.a.           | BMB* |
| <b>Total:</b> |                 |           | 200.405       | 271.421         | 100.00        | 0.000          |      |

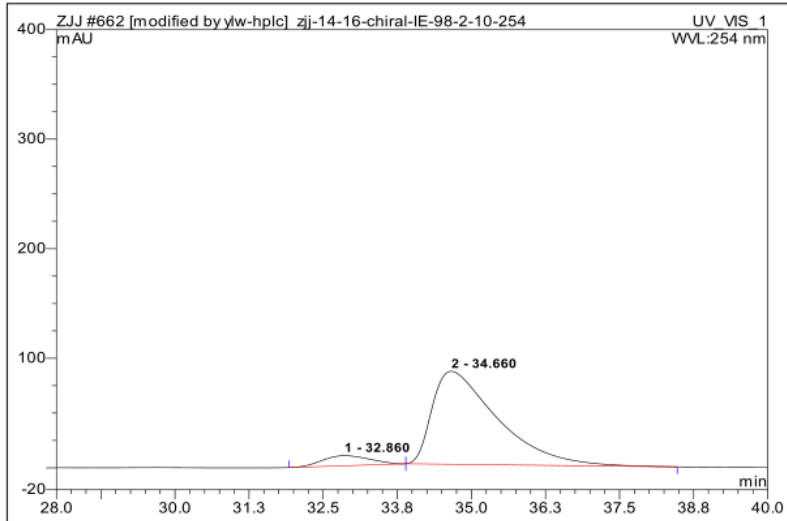

| No.           | Ret.Time<br>min | Peak Name | Height<br>mAU | Area<br>mAU*min | Rel.Area<br>% | Amount<br>n.a. | Type |
|---------------|-----------------|-----------|---------------|-----------------|---------------|----------------|------|
| 1             | 32.86           | n.a.      | 9.201         | 8.472           | 7.25          | n.a.           | BMB* |
| 2             | 34.66           | n.a.      | 84.869        | 108.326         | 92.75         | n.a.           | bMB* |
| <b>Total:</b> |                 |           | 94.070        | 116.798         | 100.00        | 0.000          |      |

(+)-**2d**: IE, *n*-hexane/2-propanol = 95/5,  $v = 1.0 \text{ mL min}^{-1}$ ,  $\lambda = 254 \text{ nm}$

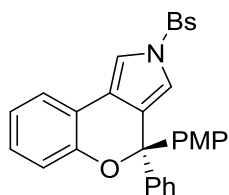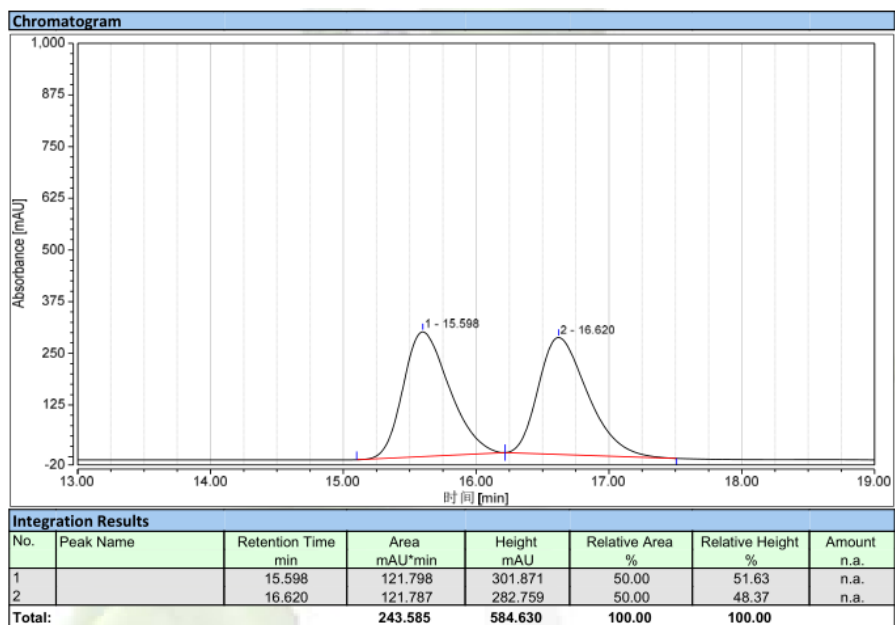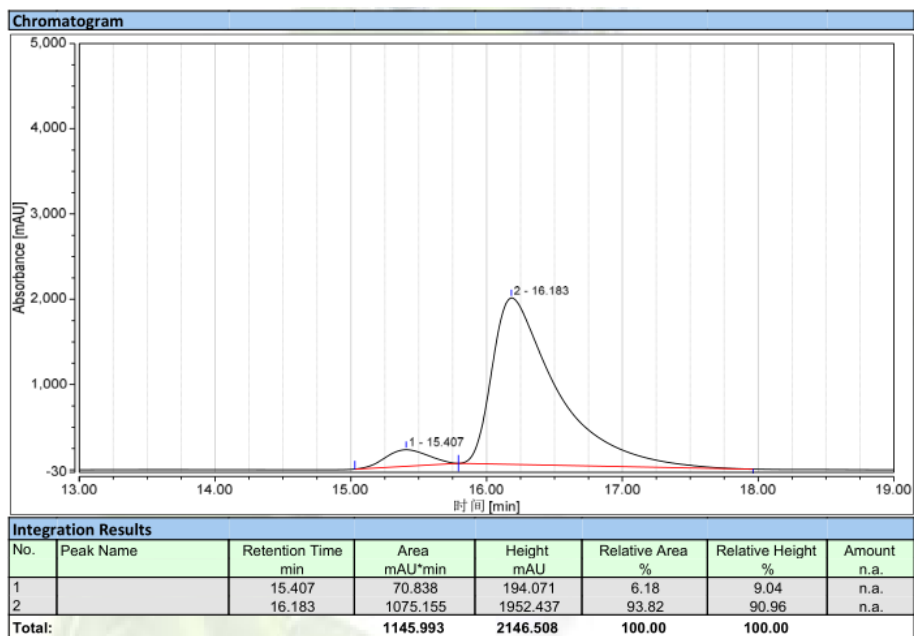



(+)-**2e**: IB, *n*-hexane/2-propanol = 90/10,  $v = 1.0 \text{ mL min}^{-1}$ ,  $\lambda = 254 \text{ nm}$

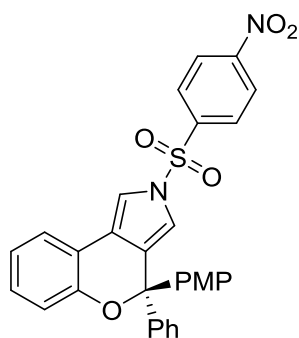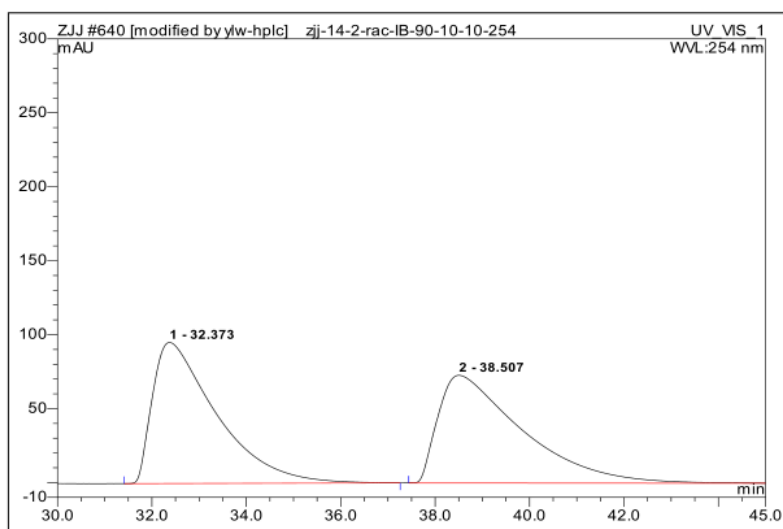

| No.           | Ret.Time<br>min | Peak Name | Height<br>mAU | Area<br>mAU*min | Rel.Area<br>% | Amount<br>n.a. | Type |
|---------------|-----------------|-----------|---------------|-----------------|---------------|----------------|------|
| 1             | 32.37           | n.a.      | 95.394        | 149.351         | 49.98         | n.a.           | BMB* |
| 2             | 38.51           | n.a.      | 72.834        | 149.498         | 50.02         | n.a.           | BMB* |
| <b>Total:</b> |                 |           | 168.228       | 298.849         | 100.00        | 0.000          |      |

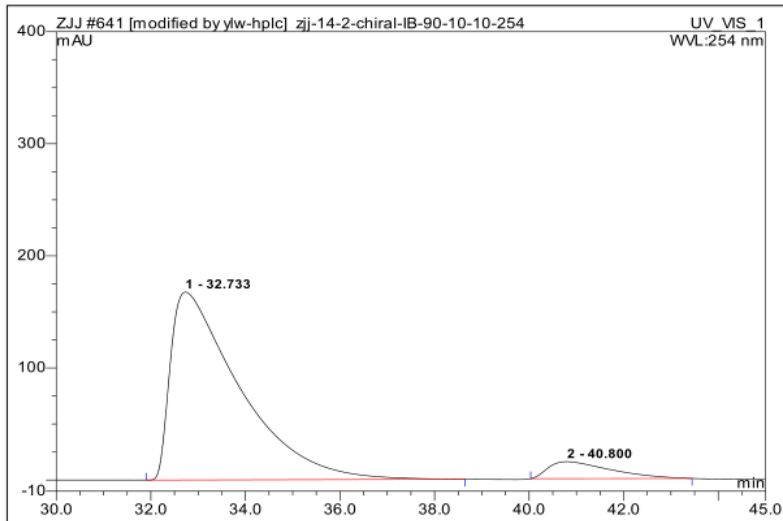

| No.           | Ret.Time<br>min | Peak Name | Height<br>mAU | Area<br>mAU*min | Rel.Area<br>% | Amount<br>n.a. | Type |
|---------------|-----------------|-----------|---------------|-----------------|---------------|----------------|------|
| 1             | 32.73           | n.a.      | 167.535       | 284.562         | 92.55         | n.a.           | BMB* |
| 2             | 40.80           | n.a.      | 15.096        | 22.914          | 7.45          | n.a.           | BMB* |
| <b>Total:</b> |                 |           | 182.631       | 307.476         | 100.00        | 0.000          |      |

(+)-**2f**: IE, *n*-hexane/2-propanol = 98/2,  $v = 1.0 \text{ mL min}^{-1}$ ,  $\lambda = 254 \text{ nm}$

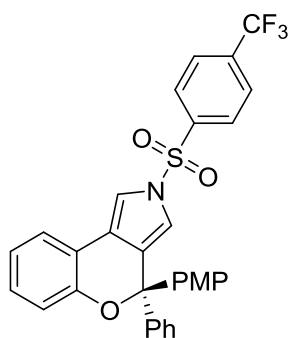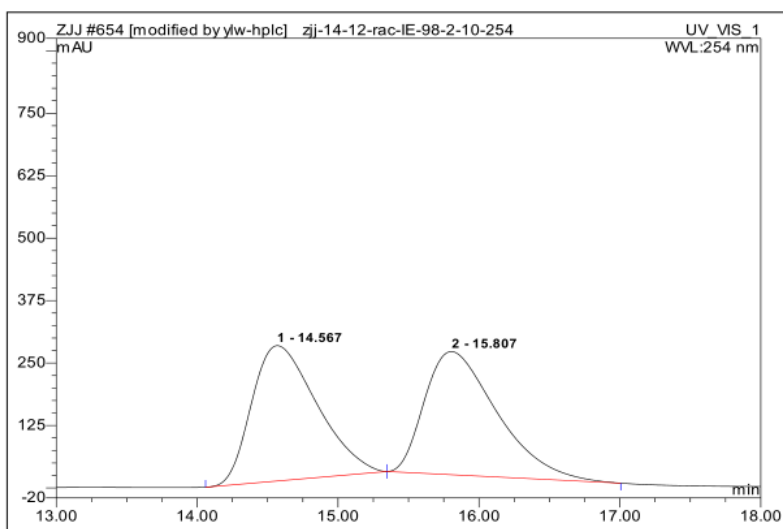

| No.           | Ret.Time min | Peak Name | Height mAU | Area mAU*min | Rel.Area % | Amount n.a. | Type |
|---------------|--------------|-----------|------------|--------------|------------|-------------|------|
| 1             | 14.57        | n.a.      | 271.003    | 144.871      | 49.64      | n.a.        | BMb* |
| 2             | 15.81        | n.a.      | 246.636    | 146.982      | 50.36      | n.a.        | bMB* |
| <b>Total:</b> |              |           | 517.639    | 291.852      | 100.00     | 0.000       |      |

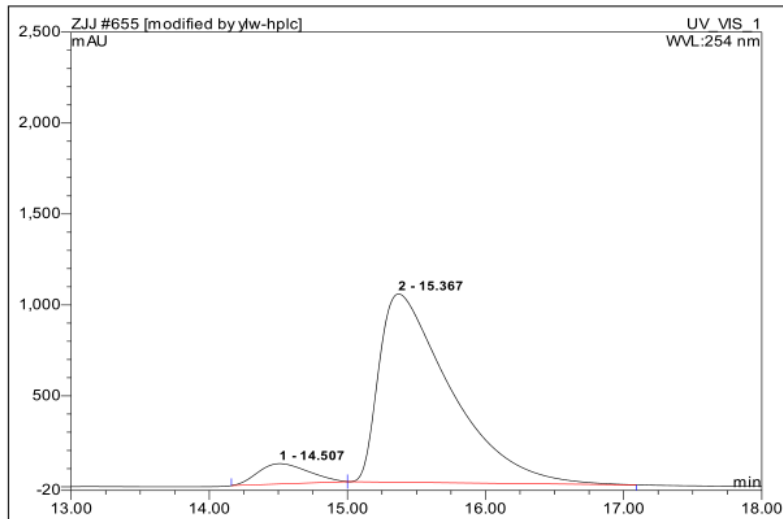

| No.           | Ret.Time min | Peak Name | Height mAU | Area mAU*min | Rel.Area % | Amount n.a. | Type |
|---------------|--------------|-----------|------------|--------------|------------|-------------|------|
| 1             | 14.51        | n.a.      | 111.696    | 47.054       | 7.03       | n.a.        | BMb* |
| 2             | 15.37        | n.a.      | 1035.430   | 622.363      | 92.97      | n.a.        | bMB* |
| <b>Total:</b> |              |           | 1147.125   | 669.417      | 100.00     | 0.000       |      |

(+)-2g: IG, *n*-hexane/2-propanol = 80/20,  $v = 1.0 \text{ mL min}^{-1}$ ,  $\lambda = 254 \text{ nm}$

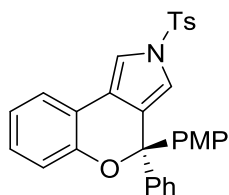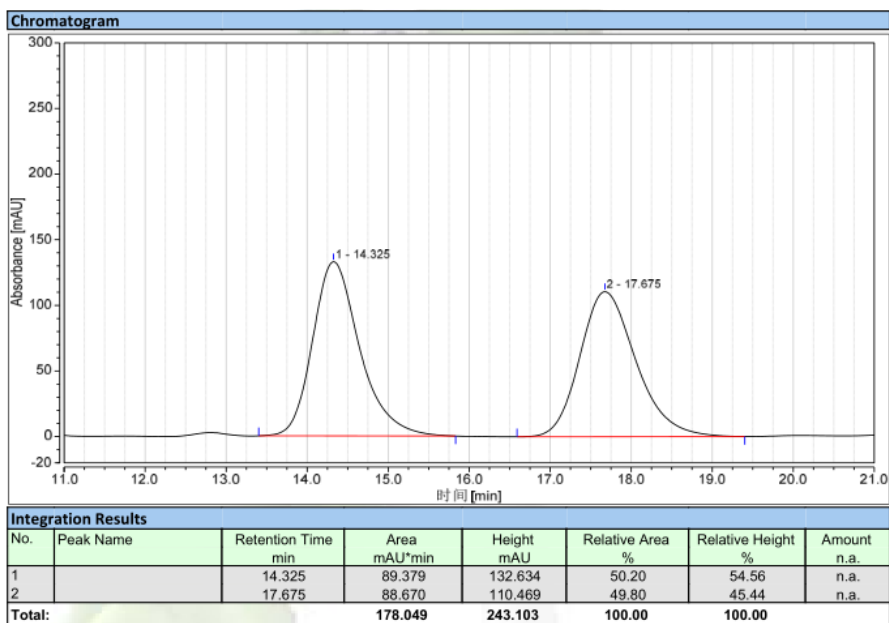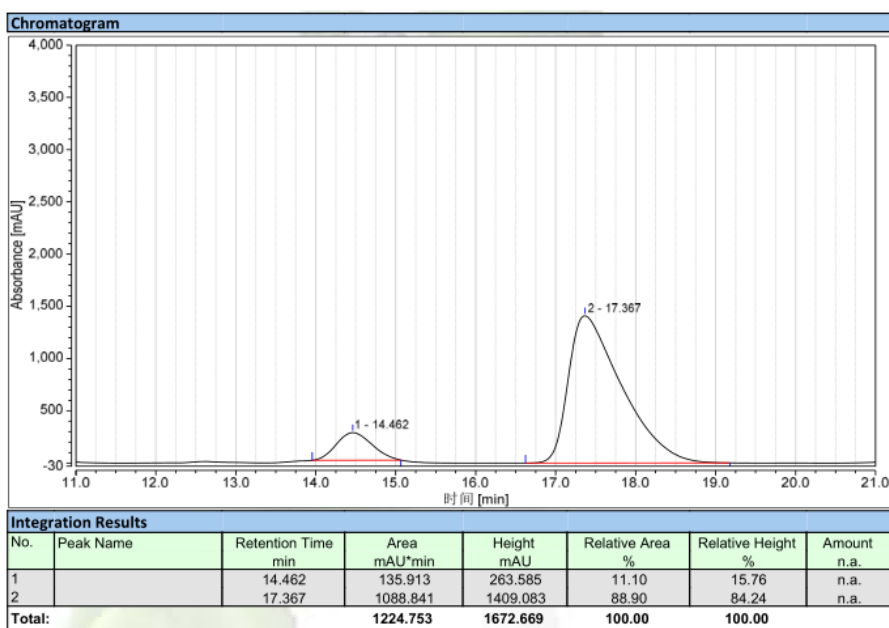

(+)-**2h**: IE, *n*-hexane/2-propanol = 95/5,  $v = 1.0 \text{ mL min}^{-1}$ ,  $\lambda = 254 \text{ nm}$

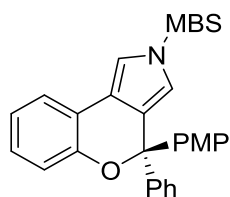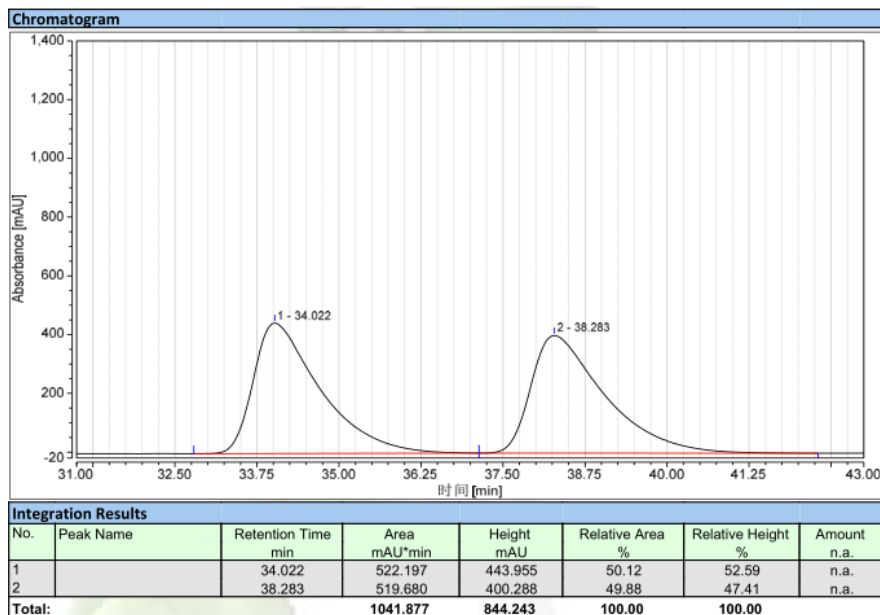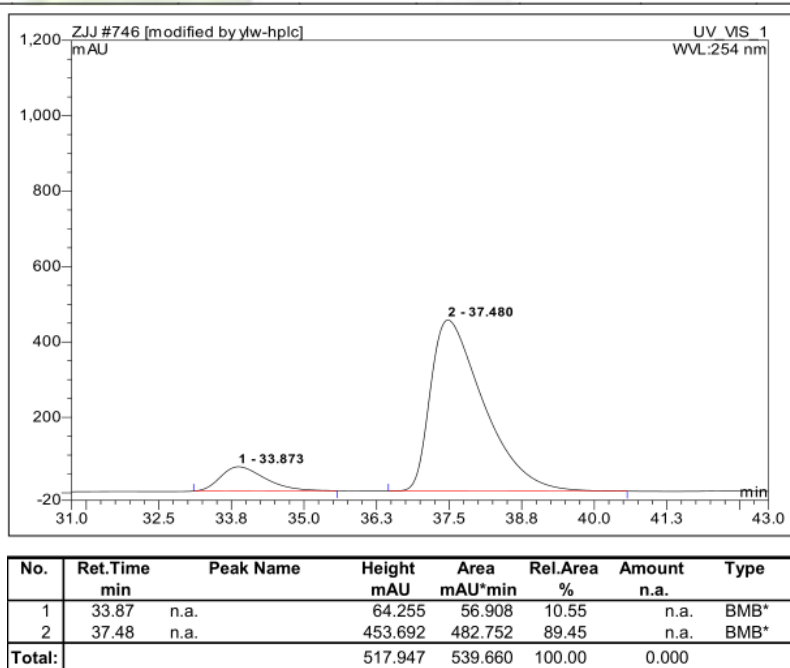

(+)-**2i**: IB, *n*-hexane/2-propanol = 90/10,  $v = 1.0 \text{ mL min}^{-1}$ ,  $\lambda = 254 \text{ nm}$

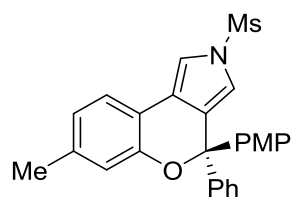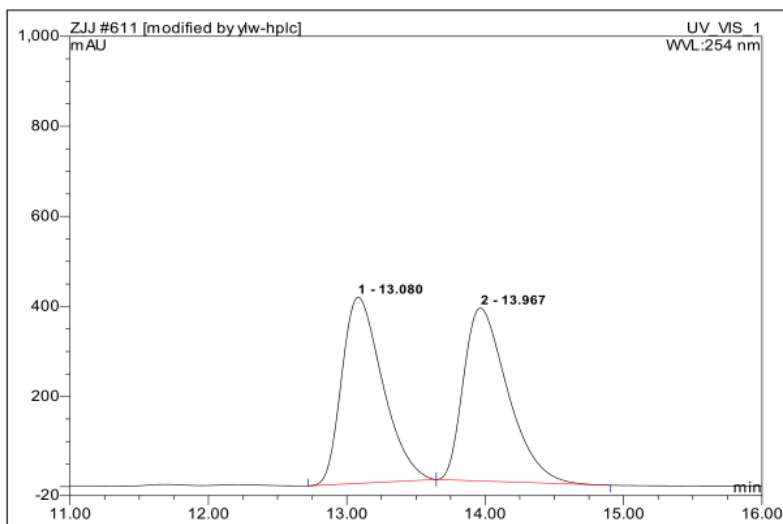

| No.           | Ret.Time min | Peak Name | Height mAU     | Area mAU*min   | Rel.Area %    | Amount n.a.  | Type |
|---------------|--------------|-----------|----------------|----------------|---------------|--------------|------|
| 1             | 13.08        | n.a.      | 413.183        | 141.223        | 49.75         | n.a.         | BMB* |
| 2             | 13.97        | n.a.      | 384.021        | 142.626        | 50.25         | n.a.         | bMB* |
| <b>Total:</b> |              |           | <b>797.205</b> | <b>283.849</b> | <b>100.00</b> | <b>0.000</b> |      |

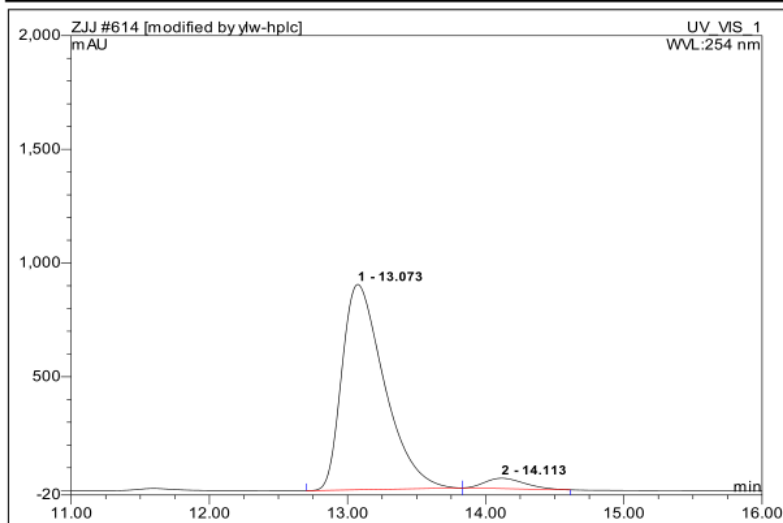

| No.           | Ret.Time min | Peak Name | Height mAU     | Area mAU*min   | Rel.Area %    | Amount n.a.  | Type |
|---------------|--------------|-----------|----------------|----------------|---------------|--------------|------|
| 1             | 13.07        | n.a.      | 902.784        | 320.449        | 95.47         | n.a.         | BMB* |
| 2             | 14.11        | n.a.      | 45.644         | 15.221         | 4.53          | n.a.         | bMB* |
| <b>Total:</b> |              |           | <b>948.429</b> | <b>335.670</b> | <b>100.00</b> | <b>0.000</b> |      |

(+)-2j: IB, *n*-hexane/2-propanol = 90/10,  $v = 1.0 \text{ mL min}^{-1}$ ,  $\lambda = 254 \text{ nm}$

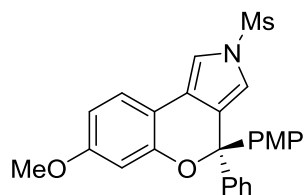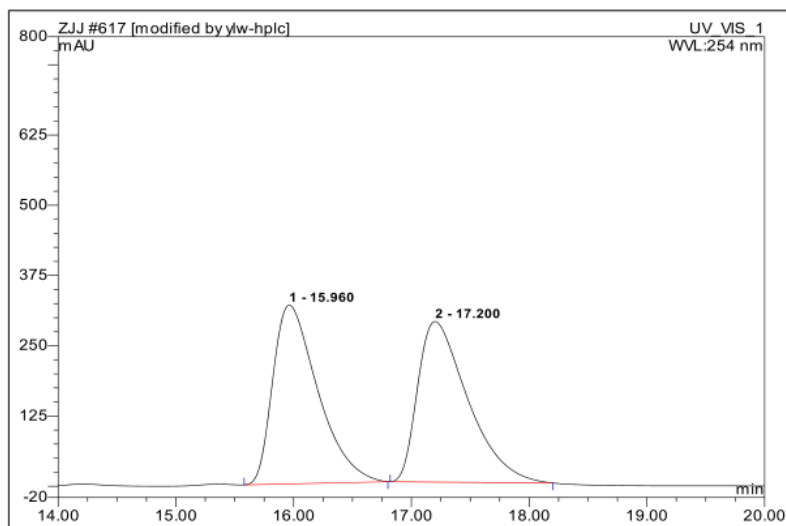

| No.           | Ret.Time min | Peak Name | Height mAU     | Area mAU*min   | Rel.Area %    | Amount n.a.  | Type |
|---------------|--------------|-----------|----------------|----------------|---------------|--------------|------|
| 1             | 15.96        | n.a.      | 318.077        | 140.783        | 49.95         | n.a.         | BMB* |
| 2             | 17.20        | n.a.      | 285.703        | 141.063        | 50.05         | n.a.         | BMB* |
| <b>Total:</b> |              |           | <b>603.780</b> | <b>281.846</b> | <b>100.00</b> | <b>0.000</b> |      |

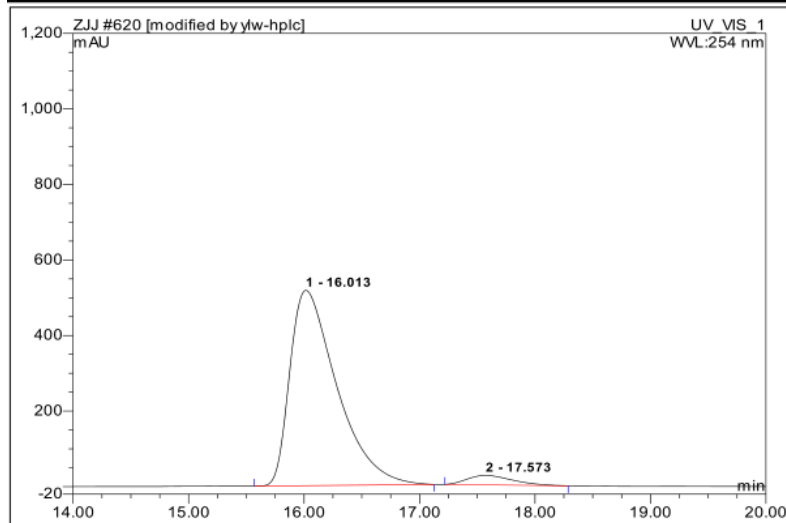

| No.           | Ret.Time min | Peak Name | Height mAU     | Area mAU*min   | Rel.Area %    | Amount n.a.  | Type |
|---------------|--------------|-----------|----------------|----------------|---------------|--------------|------|
| 1             | 16.01        | n.a.      | 516.886        | 243.700        | 95.57         | n.a.         | BMB* |
| 2             | 17.57        | n.a.      | 24.941         | 11.283         | 4.43          | n.a.         | BMB* |
| <b>Total:</b> |              |           | <b>541.827</b> | <b>254.983</b> | <b>100.00</b> | <b>0.000</b> |      |

(+)-**2k**: IA, *n*-hexane/2-propanol = 80/20,  $v = 1.0 \text{ mL min}^{-1}$ ,  $\lambda = 254 \text{ nm}$

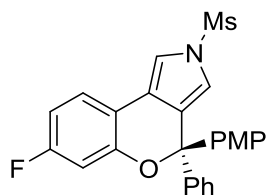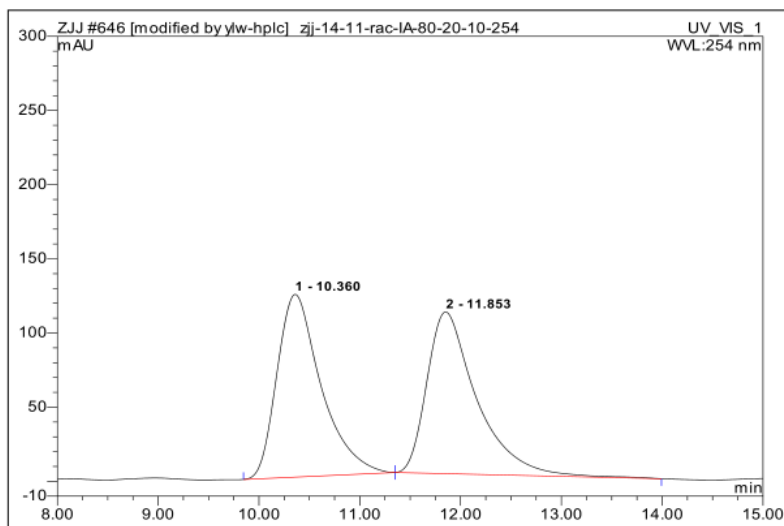

| No.           | Ret.Time<br>min | Peak Name | Height<br>mAU | Area<br>mAU*min | Rel.Area<br>% | Amount<br>n.a. | Type |
|---------------|-----------------|-----------|---------------|-----------------|---------------|----------------|------|
| 1             | 10.36           | n.a.      | 123.172       | 62.411          | 50.01         | n.a.           | BMB* |
| 2             | 11.85           | n.a.      | 109.022       | 62.398          | 49.99         | n.a.           | bMB* |
| <b>Total:</b> |                 |           | 232.194       | 124.809         | 100.00        | 0.000          |      |

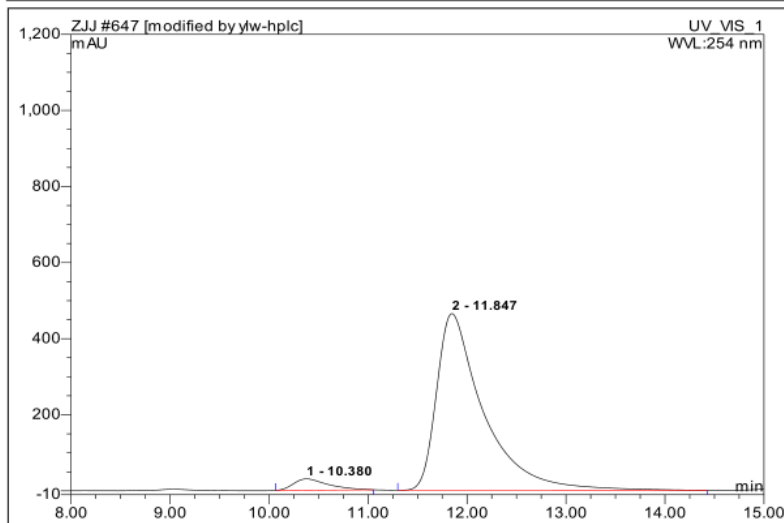

| No.           | Ret.Time<br>min | Peak Name | Height<br>mAU | Area<br>mAU*min | Rel.Area<br>% | Amount<br>n.a. | Type |
|---------------|-----------------|-----------|---------------|-----------------|---------------|----------------|------|
| 1             | 10.38           | n.a.      | 29.786        | 11.972          | 4.47          | n.a.           | BMB* |
| 2             | 11.85           | n.a.      | 464.360       | 255.595         | 95.53         | n.a.           | BMB* |
| <b>Total:</b> |                 |           | 494.146       | 267.567         | 100.00        | 0.000          |      |

(+)-**2l**: IA, *n*-hexane/2-propanol = 90/10,  $v = 1.0 \text{ mL min}^{-1}$ ,  $\lambda = 254 \text{ nm}$

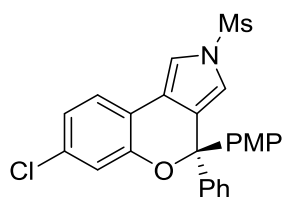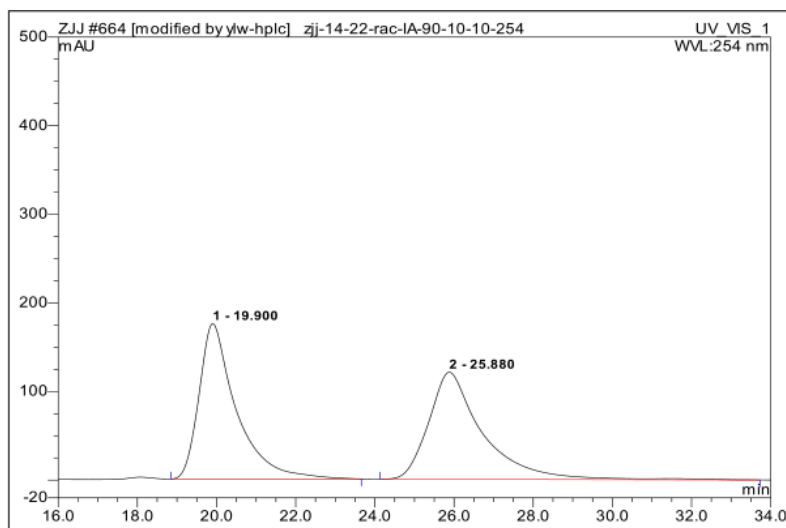

| No.           | Ret.Time<br>min | Peak Name | Height<br>mAU | Area<br>mAU*min | Rel.Area<br>% | Amount<br>n.a. | Type |
|---------------|-----------------|-----------|---------------|-----------------|---------------|----------------|------|
| 1             | 19.90           | n.a.      | 175.326       | 190.812         | 50.00         | n.a.           | BMB* |
| 2             | 25.88           | n.a.      | 120.859       | 190.836         | 50.00         | n.a.           | BMB* |
| <b>Total:</b> |                 |           | 296.185       | 381.648         | 100.00        | 0.000          |      |

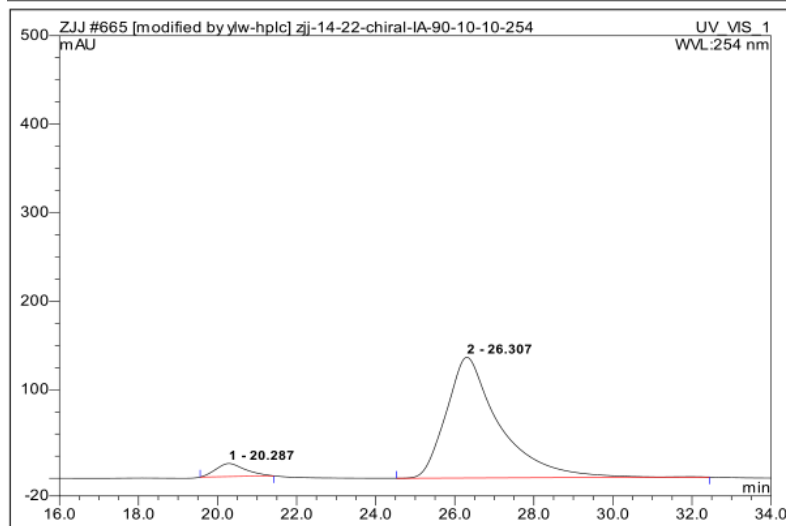

| No.           | Ret.Time<br>min | Peak Name | Height<br>mAU | Area<br>mAU*min | Rel.Area<br>% | Amount<br>n.a. | Type |
|---------------|-----------------|-----------|---------------|-----------------|---------------|----------------|------|
| 1             | 20.29           | n.a.      | 14.787        | 12.680          | 5.64          | n.a.           | BMB* |
| 2             | 26.31           | n.a.      | 136.382       | 212.253         | 94.36         | n.a.           | BMB* |
| <b>Total:</b> |                 |           | 151.168       | 224.933         | 100.00        | 0.000          |      |



(+)-**2m**: IG, *n*-hexane/2-propanol = 50/50,  $v = 1.0 \text{ mL min}^{-1}$ ,  $\lambda = 254 \text{ nm}$

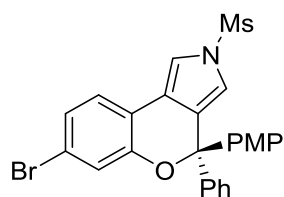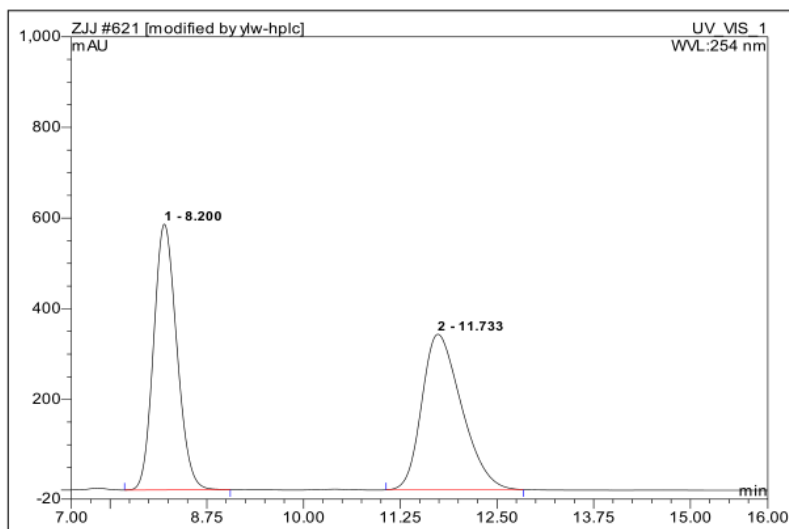

| No.           | Ret.Time min | Peak Name | Height mAU | Area mAU*min | Rel.Area % | Amount n.a. | Type |
|---------------|--------------|-----------|------------|--------------|------------|-------------|------|
| 1             | 8.20         | n.a.      | 586.328    | 203.664      | 49.92      | n.a.        | BMB* |
| 2             | 11.73        | n.a.      | 343.080    | 204.304      | 50.08      | n.a.        | BMB* |
| <b>Total:</b> |              |           | 929.408    | 407.968      | 100.00     | 0.000       |      |

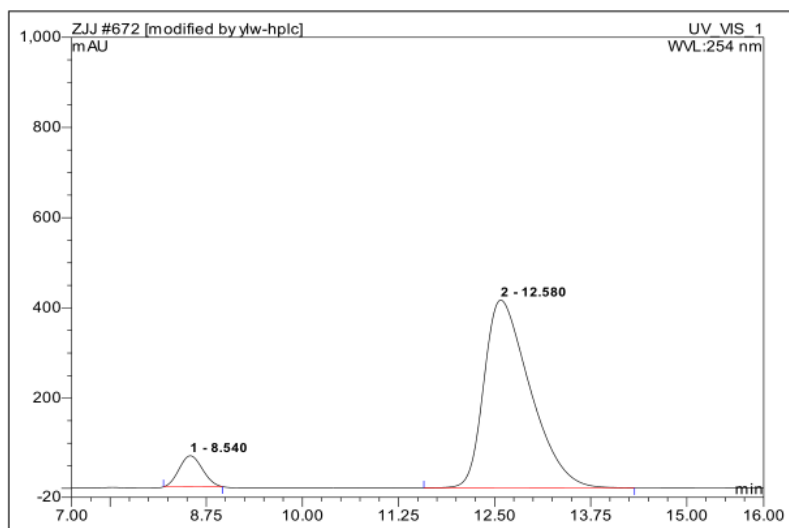

| No.           | Ret.Time min | Peak Name | Height mAU | Area mAU*min | Rel.Area % | Amount n.a. | Type |
|---------------|--------------|-----------|------------|--------------|------------|-------------|------|
| 1             | 8.54         | n.a.      | 68.638     | 24.071       | 7.68       | n.a.        | BMB* |
| 2             | 12.58        | n.a.      | 416.534    | 289.462      | 92.32      | n.a.        | BMB* |
| <b>Total:</b> |              |           | 485.172    | 313.533      | 100.00     | 0.000       |      |

(+)-**2n**: IG, *n*-hexane/2-propanol = 50/50,  $v = 1.0 \text{ mL min}^{-1}$ ,  $\lambda = 254 \text{ nm}$

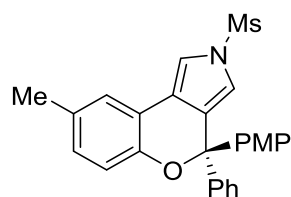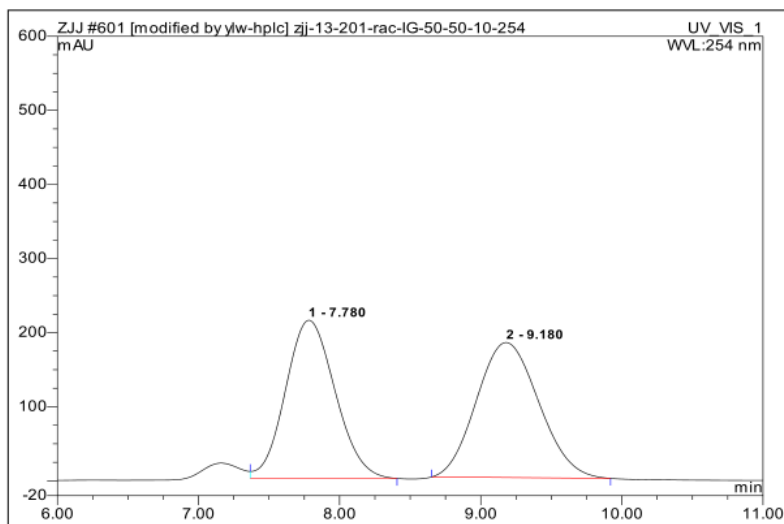

| No.           | Ret.Time<br>min | Peak Name | Height<br>mAU | Area<br>mAU*min | Rel.Area<br>% | Amount<br>n.a. | Type |
|---------------|-----------------|-----------|---------------|-----------------|---------------|----------------|------|
| 1             | 7.78            | n.a.      | 213.476       | 87.018          | 48.30         | n.a.           | MB*  |
| 2             | 9.18            | n.a.      | 182.174       | 93.134          | 51.70         | n.a.           | BMB* |
| <b>Total:</b> |                 |           | 395.650       | 180.152         | 100.00        | 0.000          |      |

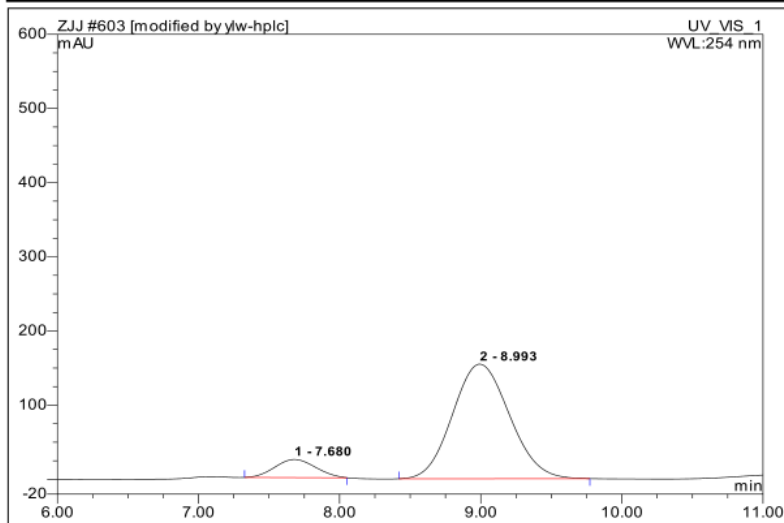

| No.           | Ret.Time<br>min | Peak Name | Height<br>mAU | Area<br>mAU*min | Rel.Area<br>% | Amount<br>n.a. | Type |
|---------------|-----------------|-----------|---------------|-----------------|---------------|----------------|------|
| 1             | 7.68            | n.a.      | 24.388        | 8.146           | 10.13         | n.a.           | BMB* |
| 2             | 8.99            | n.a.      | 154.492       | 72.286          | 89.87         | n.a.           | BMB* |
| <b>Total:</b> |                 |           | 178.880       | 80.432          | 100.00        | 0.000          |      |

(+)-**2t**: IA, *n*-hexane/2-propanol = 70/30,  $v = 1.0 \text{ mL min}^{-1}$ ,  $\lambda = 254 \text{ nm}$

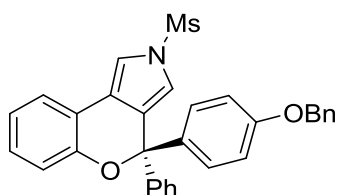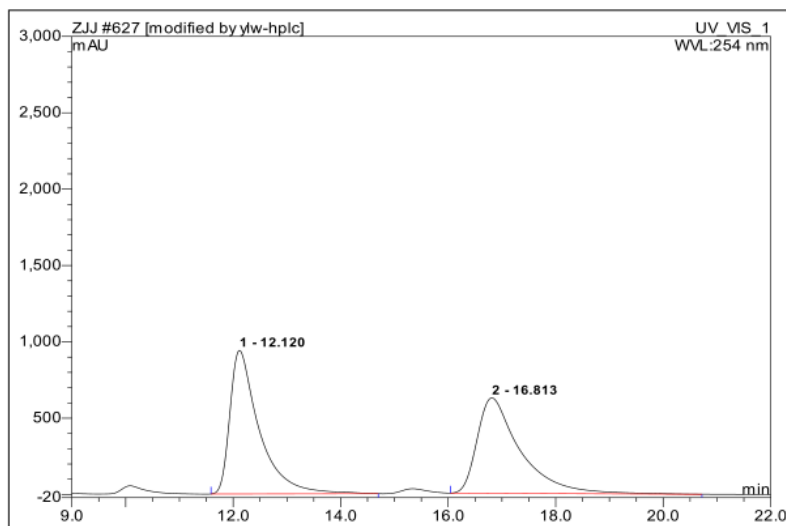

| No.           | Ret.Time<br>min | Peak Name | Height<br>mAU | Area<br>mAU*min | Rel.Area<br>% | Amount<br>n.a. | Type |
|---------------|-----------------|-----------|---------------|-----------------|---------------|----------------|------|
| 1             | 12.12           | n.a.      | 939.596       | 595.337         | 50.66         | n.a.           | BMB* |
| 2             | 16.81           | n.a.      | 624.379       | 579.748         | 49.34         | n.a.           | BMB* |
| <b>Total:</b> |                 |           | 1563.975      | 1175.085        | 100.00        | 0.000          |      |

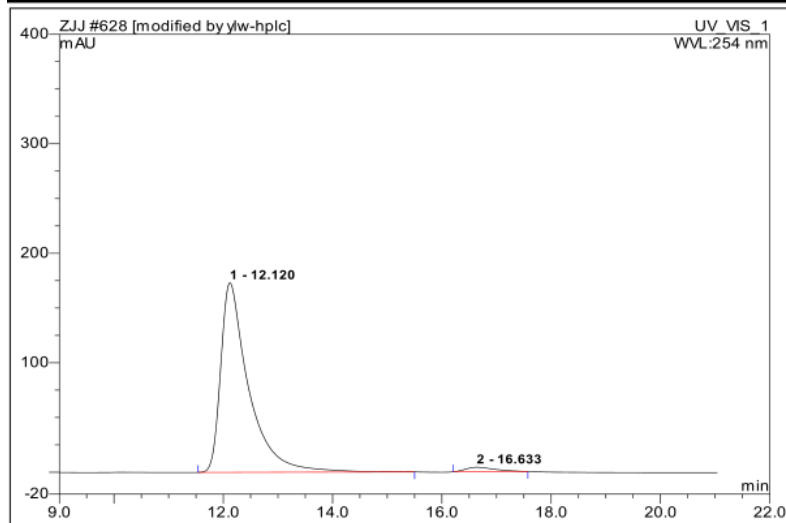

| No.           | Ret.Time<br>min | Peak Name | Height<br>mAU | Area<br>mAU*min | Rel.Area<br>% | Amount<br>n.a. | Type |
|---------------|-----------------|-----------|---------------|-----------------|---------------|----------------|------|
| 1             | 12.12           | n.a.      | 173.132       | 102.904         | 97.54         | n.a.           | BMB* |
| 2             | 16.63           | n.a.      | 4.107         | 2.591           | 2.46          | n.a.           | BMB* |
| <b>Total:</b> |                 |           | 177.240       | 105.496         | 100.00        | 0.000          |      |

(+)-**2u**: IB, *n*-hexane/2-propanol = 90/10,  $v = 1.0 \text{ mL min}^{-1}$ ,  $\lambda = 254 \text{ nm}$

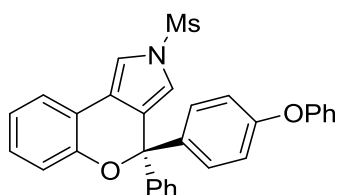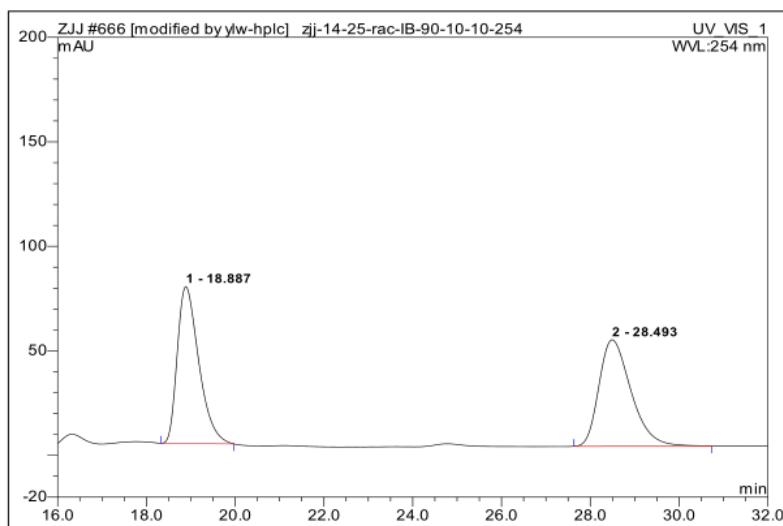

| No.           | Ret.Time<br>min | Peak Name | Height<br>mAU | Area<br>mAU*min | Rel.Area<br>% | Amount<br>n.a. | Type |
|---------------|-----------------|-----------|---------------|-----------------|---------------|----------------|------|
| 1             | 18.89           | n.a.      | 75.054        | 42.161          | 49.79         | n.a.           | BMB* |
| 2             | 28.49           | n.a.      | 50.906        | 42.508          | 50.21         | n.a.           | BMB* |
| <b>Total:</b> |                 |           | 125.960       | 84.669          | 100.00        | 0.000          |      |

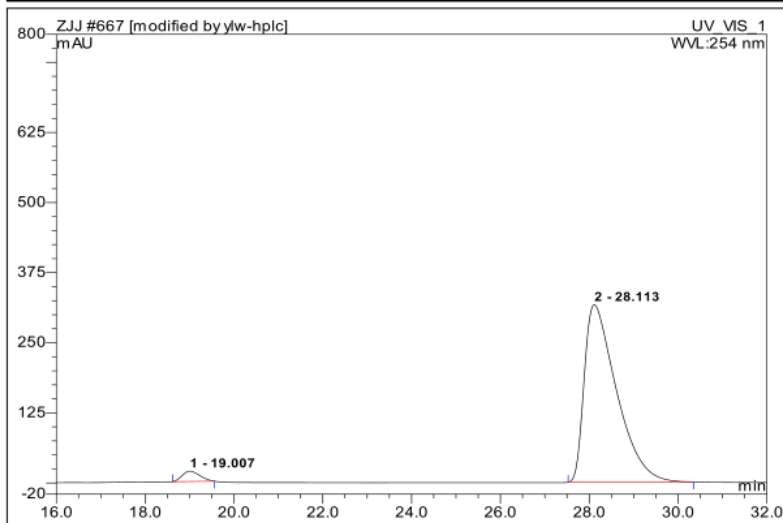

| No.           | Ret.Time<br>min | Peak Name | Height<br>mAU | Area<br>mAU*min | Rel.Area<br>% | Amount<br>n.a. | Type |
|---------------|-----------------|-----------|---------------|-----------------|---------------|----------------|------|
| 1             | 19.01           | n.a.      | 18.363        | 8.386           | 3.06          | n.a.           | BMB* |
| 2             | 28.11           | n.a.      | 316.440       | 266.018         | 96.94         | n.a.           | BMB* |
| <b>Total:</b> |                 |           | 334.802       | 274.404         | 100.00        | 0.000          |      |

(+)-**2v**: IB, *n*-hexane/2-propanol = 90/10,  $v = 1.0 \text{ mL min}^{-1}$ ,  $\lambda = 254 \text{ nm}$

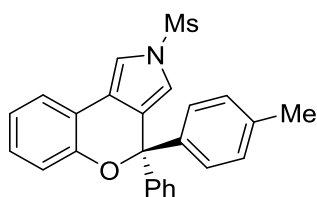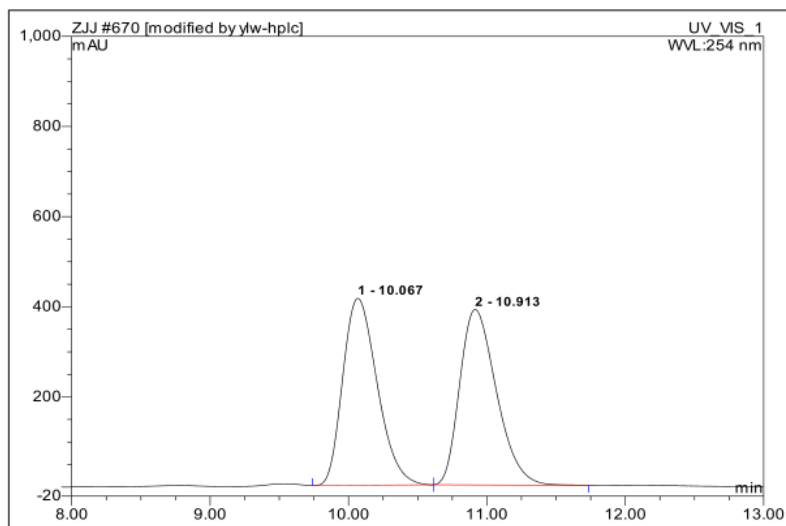

| No.           | Ret.Time<br>min | Peak Name | Height<br>mAU | Area<br>mAU*min | Rel.Area<br>% | Amount<br>n.a. | Type |
|---------------|-----------------|-----------|---------------|-----------------|---------------|----------------|------|
| 1             | 10.07           | n.a.      | 414.639       | 119.565         | 50.00         | n.a.           | BMB* |
| 2             | 10.91           | n.a.      | 389.216       | 119.574         | 50.00         | n.a.           | bMB* |
| <b>Total:</b> |                 |           | 803.855       | 239.139         | 100.00        | 0.000          |      |

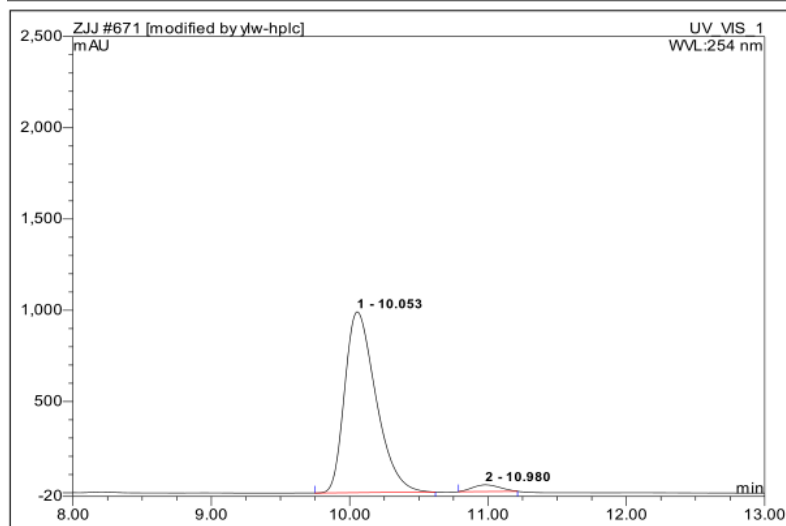

| No.           | Ret.Time<br>min | Peak Name | Height<br>mAU | Area<br>mAU*min | Rel.Area<br>% | Amount<br>n.a. | Type |
|---------------|-----------------|-----------|---------------|-----------------|---------------|----------------|------|
| 1             | 10.05           | n.a.      | 991.206       | 259.722         | 96.91         | n.a.           | BMB* |
| 2             | 10.98           | n.a.      | 36.331        | 8.272           | 3.09          | n.a.           | BMB* |
| <b>Total:</b> |                 |           | 1027.537      | 267.994         | 100.00        | 0.000          |      |

(+)-2w: IA, *n*-hexane/2-propanol = 90/10,  $v = 1.0 \text{ mL min}^{-1}$ ,  $\lambda = 254 \text{ nm}$

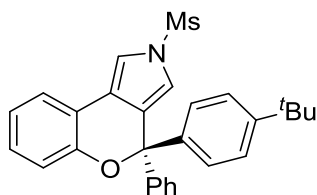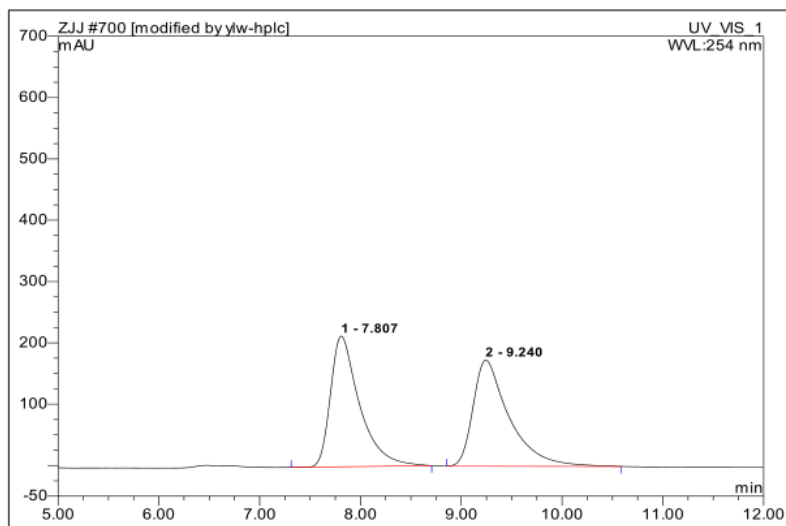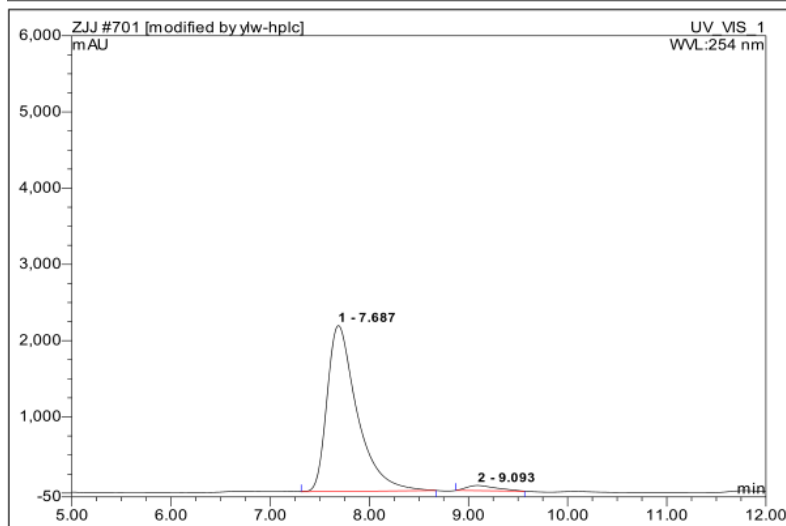

(+)-**2x**: IB, *n*-hexane/2-propanol = 80/20,  $v = 1.0 \text{ mL min}^{-1}$ ,  $\lambda = 254 \text{ nm}$

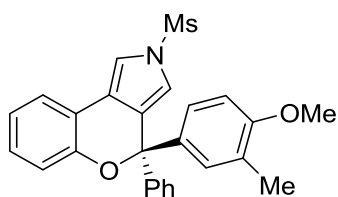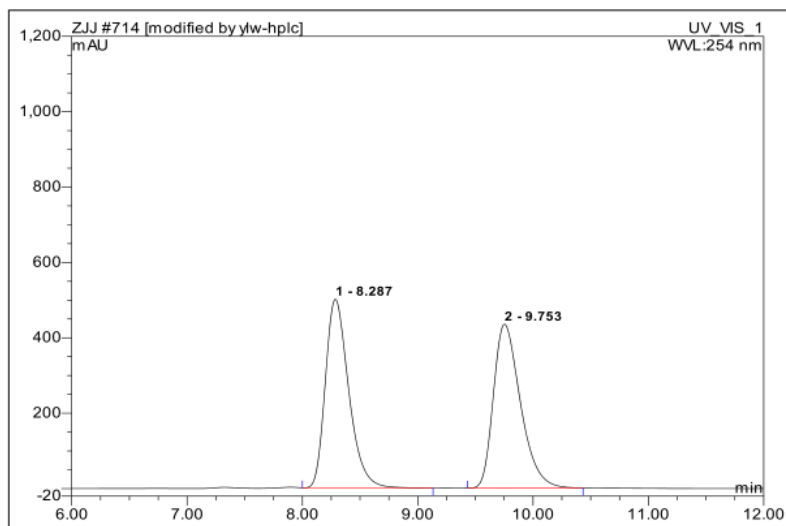

| No.           | Ret.Time<br>min | Peak Name | Height<br>mAU | Area<br>mAU*min | Rel.Area<br>% | Amount<br>n.a. | Type |
|---------------|-----------------|-----------|---------------|-----------------|---------------|----------------|------|
| 1             | 8.29            | n.a.      | 500.525       | 117.863         | 49.95         | n.a.           | BMB* |
| 2             | 9.75            | n.a.      | 434.689       | 118.092         | 50.05         | n.a.           | BMB* |
| <b>Total:</b> |                 |           | 935.214       | 235.955         | 100.00        | 0.000          |      |

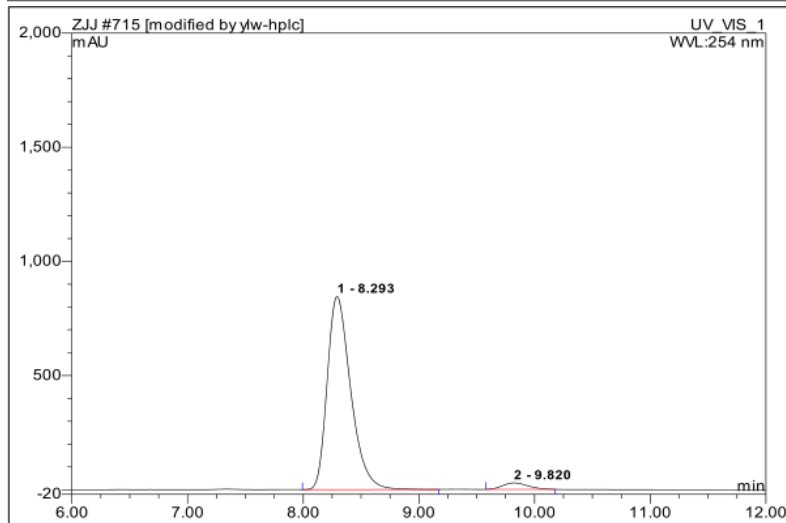

| No.           | Ret.Time<br>min | Peak Name | Height<br>mAU | Area<br>mAU*min | Rel.Area<br>% | Amount<br>n.a. | Type |
|---------------|-----------------|-----------|---------------|-----------------|---------------|----------------|------|
| 1             | 8.29            | n.a.      | 845.601       | 199.127         | 96.50         | n.a.           | BMB* |
| 2             | 9.82            | n.a.      | 28.492        | 7.232           | 3.50          | n.a.           | BMB* |
| <b>Total:</b> |                 |           | 874.093       | 206.359         | 100.00        | 0.000          |      |

(+)-**2y**: IA, *n*-hexane/2-propanol = 90/10,  $v = 1.0 \text{ mL min}^{-1}$ ,  $\lambda = 254 \text{ nm}$

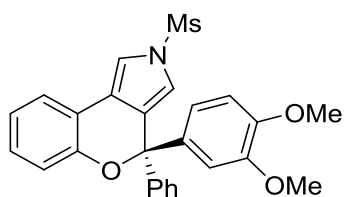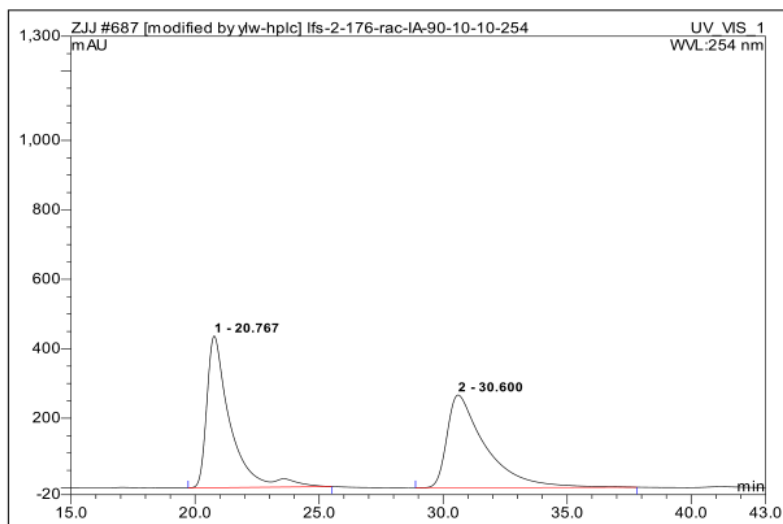

| No.           | Ret.Time<br>min | Peak Name | Height<br>mAU | Area<br>mAU*min | Rel.Area<br>% | Amount<br>n.a. | Type |
|---------------|-----------------|-----------|---------------|-----------------|---------------|----------------|------|
| 1             | 20.77           | n.a.      | 436.336       | 477.144         | 50.00         | n.a.           | BMB* |
| 2             | 30.60           | n.a.      | 266.746       | 477.174         | 50.00         | n.a.           | BMB* |
| <b>Total:</b> |                 |           | 703.082       | 954.318         | 100.00        | 0.000          |      |

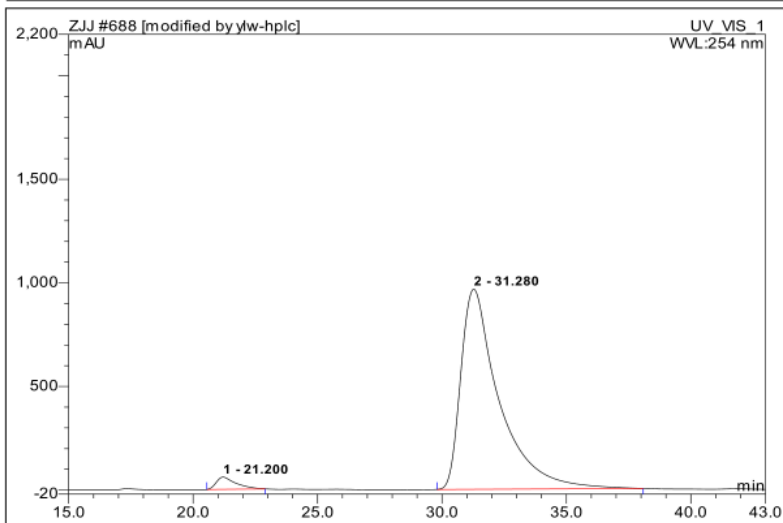

| No.           | Ret.Time<br>min | Peak Name | Height<br>mAU | Area<br>mAU*min | Rel.Area<br>% | Amount<br>n.a. | Type |
|---------------|-----------------|-----------|---------------|-----------------|---------------|----------------|------|
| 1             | 21.20           | n.a.      | 58.941        | 54.211          | 3.04          | n.a.           | BMB* |
| 2             | 31.28           | n.a.      | 966.180       | 1729.808        | 96.96         | n.a.           | BMB* |
| <b>Total:</b> |                 |           | 1025.121      | 1784.019        | 100.00        | 0.000          |      |



(+)-**2z**: IA, *n*-hexane/2-propanol = 90/10,  $v = 1.0 \text{ mL min}^{-1}$ ,  $\lambda = 254 \text{ nm}$

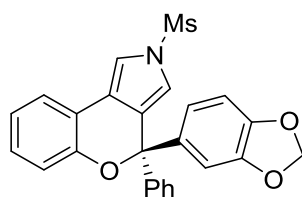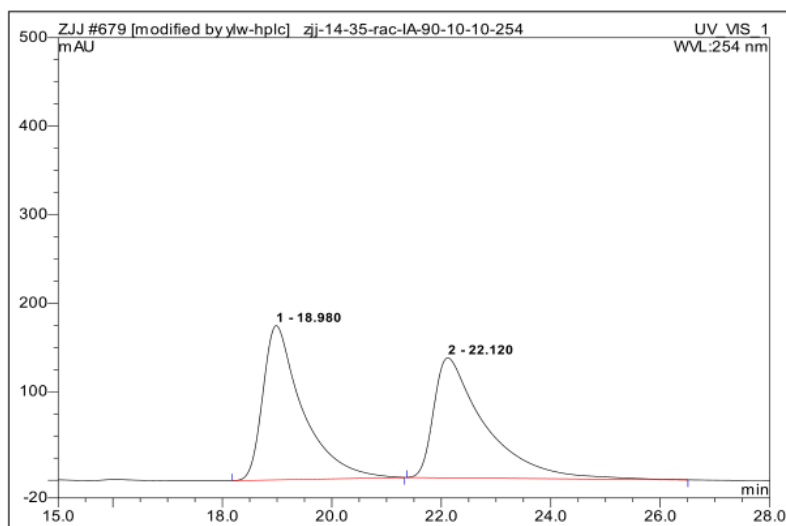

| No.           | Ret.Time<br>min | Peak Name | Height<br>mAU | Area<br>mAU*min | Rel.Area<br>% | Amount<br>n.a. | Type |
|---------------|-----------------|-----------|---------------|-----------------|---------------|----------------|------|
| 1             | 18.98           | n.a.      | 174.239       | 146.203         | 50.00         | n.a.           | BMB* |
| 2             | 22.12           | n.a.      | 135.467       | 146.183         | 50.00         | n.a.           | BMB* |
| <b>Total:</b> |                 |           | 309.706       | 292.386         | 100.00        | 0.000          |      |

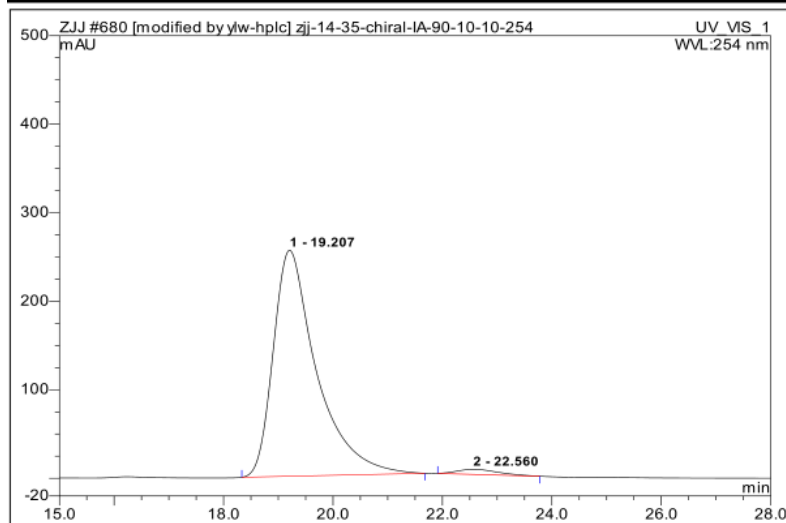

| No.           | Ret.Time<br>min | Peak Name | Height<br>mAU | Area<br>mAU*min | Rel.Area<br>% | Amount<br>n.a. | Type |
|---------------|-----------------|-----------|---------------|-----------------|---------------|----------------|------|
| 1             | 19.21           | n.a.      | 255.271       | 234.103         | 97.93         | n.a.           | BMB* |
| 2             | 22.56           | n.a.      | 5.732         | 4.956           | 2.07          | n.a.           | BMB* |
| <b>Total:</b> |                 |           | 261.004       | 239.058         | 100.00        | 0.000          |      |

(+)-**2aa**: IB, *n*-hexane/2-propanol = 90/10,  $v = 1.0 \text{ mL min}^{-1}$ ,  $\lambda = 254 \text{ nm}$

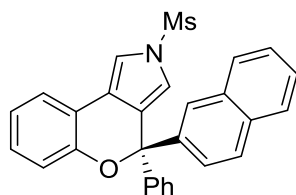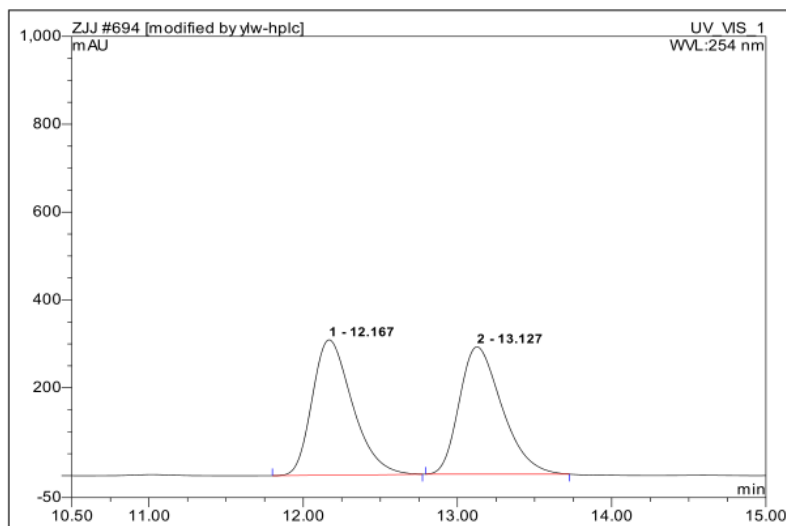

| No.           | Ret.Time min | Peak Name | Height mAU     | Area mAU*min   | Rel.Area %    | Amount n.a.  | Type |
|---------------|--------------|-----------|----------------|----------------|---------------|--------------|------|
| 1             | 12.17        | n.a.      | 308.238        | 93.237         | 50.00         | n.a.         | BMB* |
| 2             | 13.13        | n.a.      | 290.041        | 93.227         | 50.00         | n.a.         | BMB* |
| <b>Total:</b> |              |           | <b>598.279</b> | <b>186.463</b> | <b>100.00</b> | <b>0.000</b> |      |

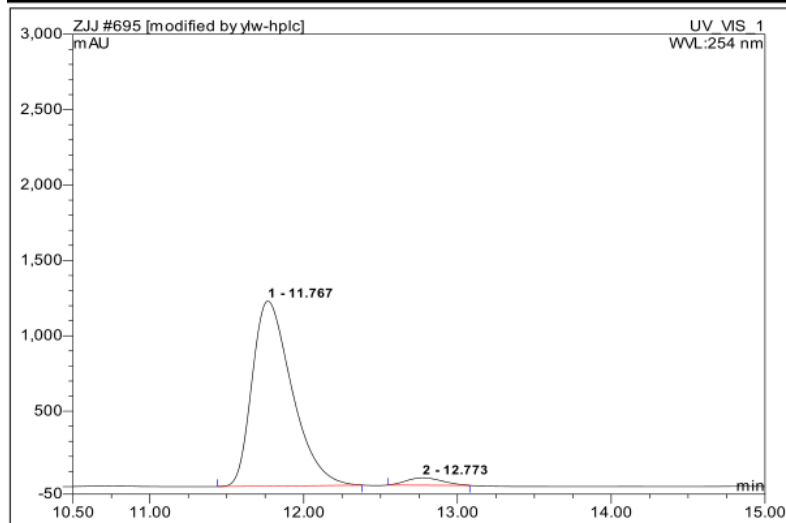

| No.           | Ret.Time min | Peak Name | Height mAU      | Area mAU*min   | Rel.Area %    | Amount n.a.  | Type |
|---------------|--------------|-----------|-----------------|----------------|---------------|--------------|------|
| 1             | 11.77        | n.a.      | 1227.707        | 367.958        | 96.52         | n.a.         | BMB* |
| 2             | 12.77        | n.a.      | 49.193          | 13.271         | 3.48          | n.a.         | BMB* |
| <b>Total:</b> |              |           | <b>1276.899</b> | <b>381.229</b> | <b>100.00</b> | <b>0.000</b> |      |

(+)-**2ab**: IG, *n*-hexane/2-propanol = 90/10,  $v = 1.0 \text{ mL min}^{-1}$ ,  $\lambda = 254 \text{ nm}$

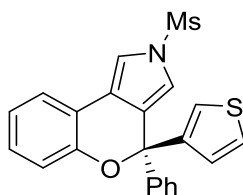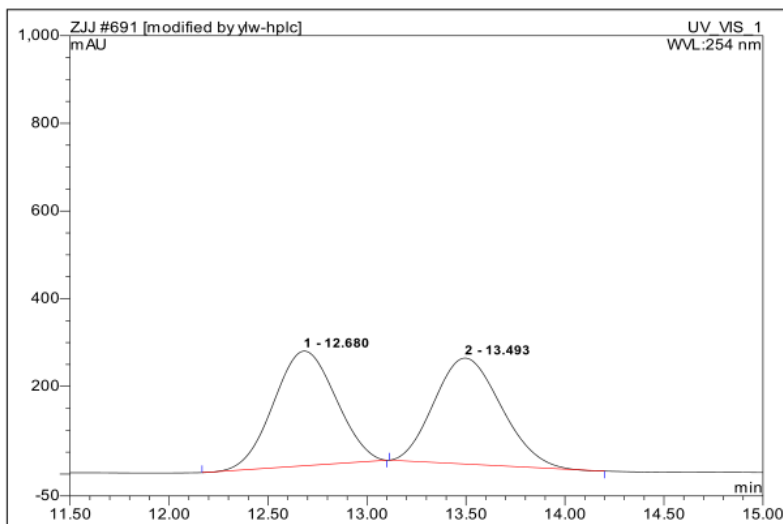

| No.           | Ret.Time min | Peak Name | Height mAU     | Area mAU*min   | Rel.Area %    | Amount n.a.  | Type |
|---------------|--------------|-----------|----------------|----------------|---------------|--------------|------|
| 1             | 12.68        | n.a.      | 261.518        | 95.147         | 50.14         | n.a.         | BMB* |
| 2             | 13.49        | n.a.      | 241.530        | 94.628         | 49.86         | n.a.         | BMB* |
| <b>Total:</b> |              |           | <b>503.047</b> | <b>189.775</b> | <b>100.00</b> | <b>0.000</b> |      |

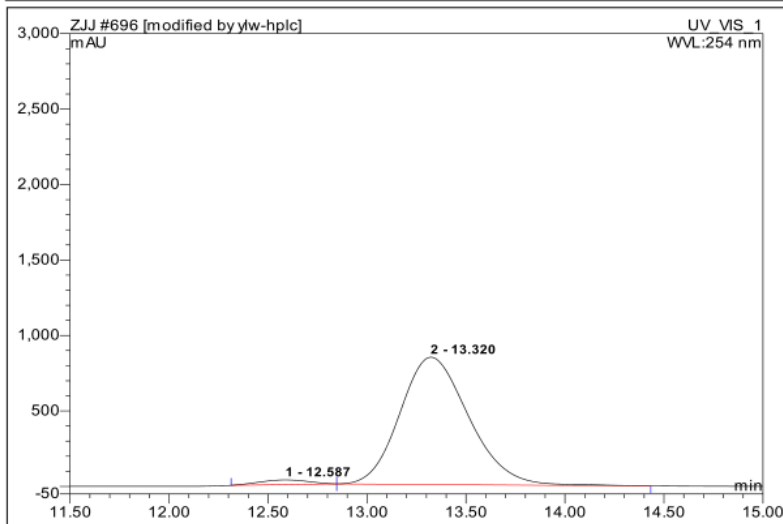

| No.           | Ret.Time min | Peak Name | Height mAU     | Area mAU*min   | Rel.Area %    | Amount n.a.  | Type |
|---------------|--------------|-----------|----------------|----------------|---------------|--------------|------|
| 1             | 12.59        | n.a.      | 30.731         | 8.742          | 2.51          | n.a.         | BMB* |
| 2             | 13.32        | n.a.      | 843.077        | 340.068        | 97.49         | n.a.         | bMB* |
| <b>Total:</b> |              |           | <b>873.808</b> | <b>348.811</b> | <b>100.00</b> | <b>0.000</b> |      |

(+)-**2ac**: IB, *n*-hexane/2-propanol = 95/5,  $v = 1.0 \text{ mL min}^{-1}$ ,  $\lambda = 254 \text{ nm}$

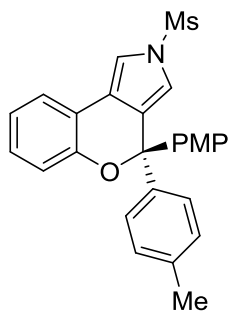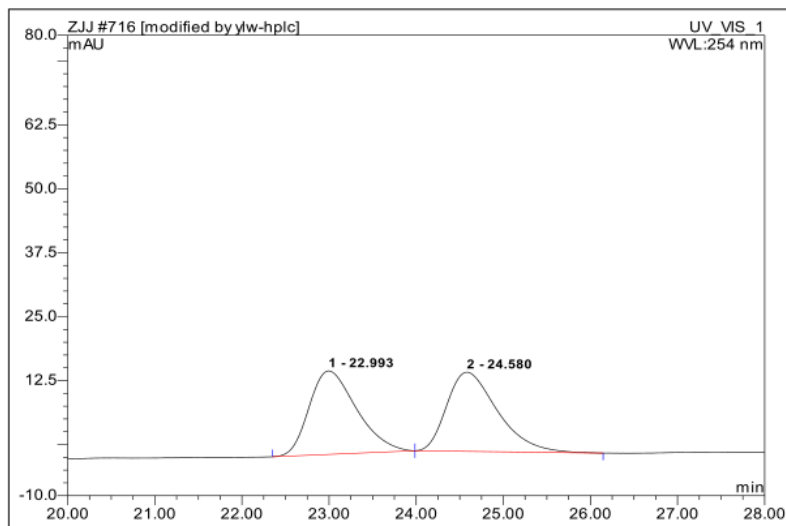

| No.           | Ret.Time min | Peak Name | Height mAU | Area mAU*min | Rel.Area % | Amount n.a. | Type |
|---------------|--------------|-----------|------------|--------------|------------|-------------|------|
| 1             | 22.99        | n.a.      | 16.317     | 10.265       | 49.63      | n.a.        | BMB* |
| 2             | 24.58        | n.a.      | 15.483     | 10.419       | 50.37      | n.a.        | bMB* |
| <b>Total:</b> |              |           | 31.800     | 20.683       | 100.00     | 0.000       |      |

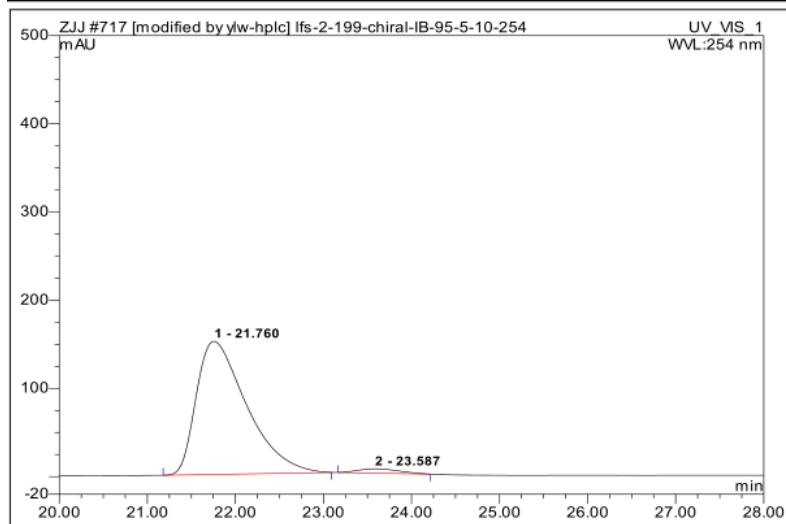

| No.           | Ret.Time min | Peak Name | Height mAU | Area mAU*min | Rel.Area % | Amount n.a. | Type |
|---------------|--------------|-----------|------------|--------------|------------|-------------|------|
| 1             | 21.76        | n.a.      | 150.818    | 99.839       | 97.43      | n.a.        | BMB* |
| 2             | 23.59        | n.a.      | 4.870      | 2.633        | 2.57       | n.a.        | BMB* |
| <b>Total:</b> |              |           | 155.688    | 102.472      | 100.00     | 0.000       |      |

(+)-**2ae**: IB, *n*-hexane/2-propanol = 90/10,  $v = 1.0 \text{ mL min}^{-1}$ ,  $\lambda = 254 \text{ nm}$

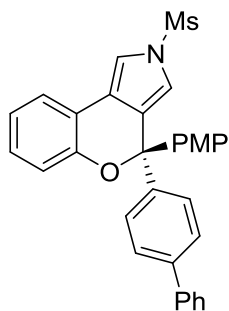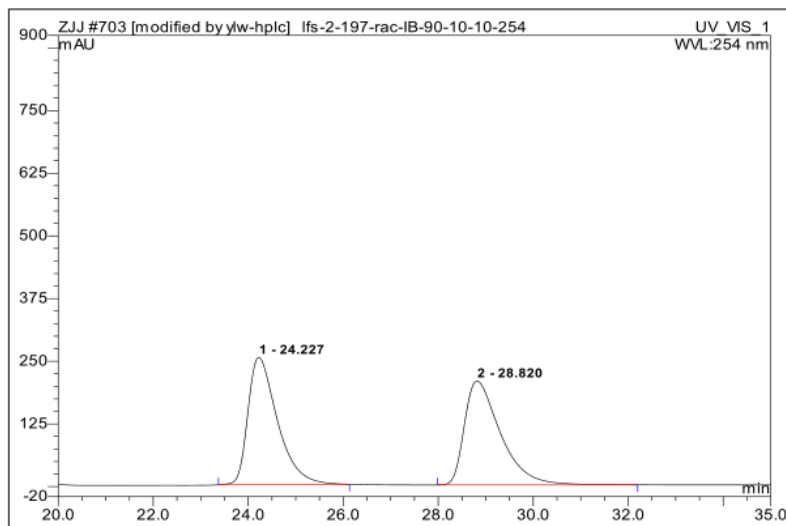

| No.           | Ret.Time min | Peak Name | Height mAU | Area mAU*min | Rel.Area % | Amount n.a. | Type |
|---------------|--------------|-----------|------------|--------------|------------|-------------|------|
| 1             | 24.23        | n.a.      | 254.055    | 183.114      | 50.06      | n.a.        | BMB* |
| 2             | 28.82        | n.a.      | 207.500    | 182.662      | 49.94      | n.a.        | BMB* |
| <b>Total:</b> |              |           | 461.555    | 365.775      | 100.00     | 0.000       |      |

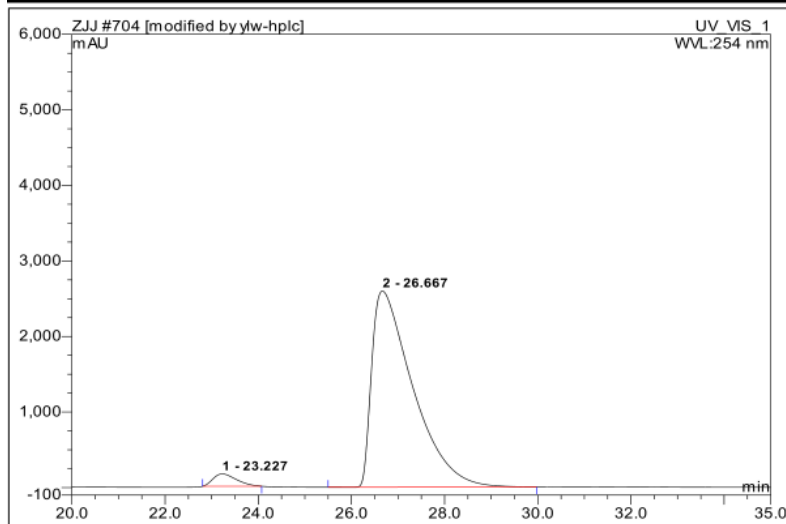

| No.           | Ret.Time min | Peak Name | Height mAU | Area mAU*min | Rel.Area % | Amount n.a. | Type |
|---------------|--------------|-----------|------------|--------------|------------|-------------|------|
| 1             | 23.23        | n.a.      | 163.549    | 95.505       | 3.46       | n.a.        | BMB* |
| 2             | 26.67        | n.a.      | 2598.095   | 2665.034     | 96.54      | n.a.        | BMB* |
| <b>Total:</b> |              |           | 2761.643   | 2760.540     | 100.00     | 0.000       |      |

(+)-**2af**: IB, *n*-hexane/2-propanol = 95/5,  $v = 1.0 \text{ mL min}^{-1}$ ,  $\lambda = 254 \text{ nm}$

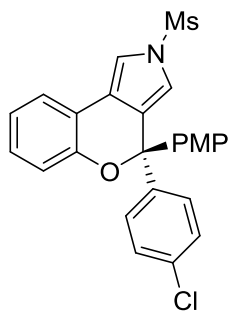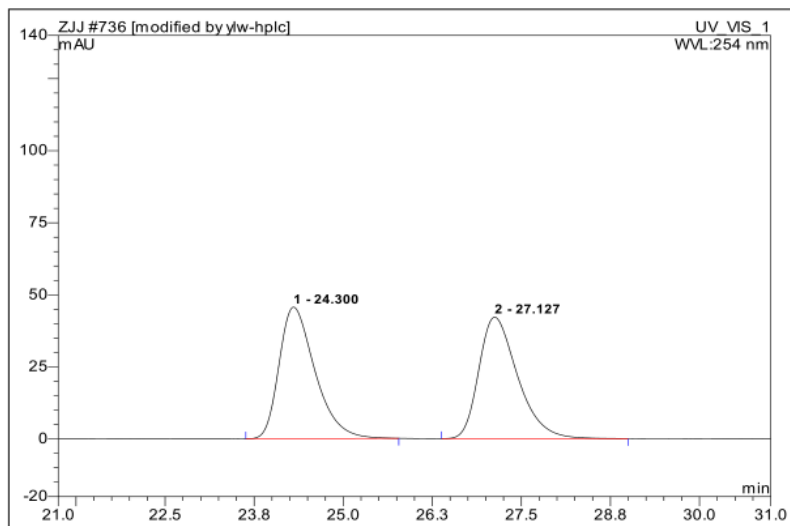

| No.           | Ret.Time min | Peak Name | Height mAU    | Area mAU*min  | Rel.Area %    | Amount n.a.  | Type |
|---------------|--------------|-----------|---------------|---------------|---------------|--------------|------|
| 1             | 24.30        | n.a.      | 45.627        | 26.677        | 50.08         | n.a.         | BMB* |
| 2             | 27.13        | n.a.      | 42.147        | 26.597        | 49.92         | n.a.         | BMB* |
| <b>Total:</b> |              |           | <b>87.775</b> | <b>53.275</b> | <b>100.00</b> | <b>0.000</b> |      |

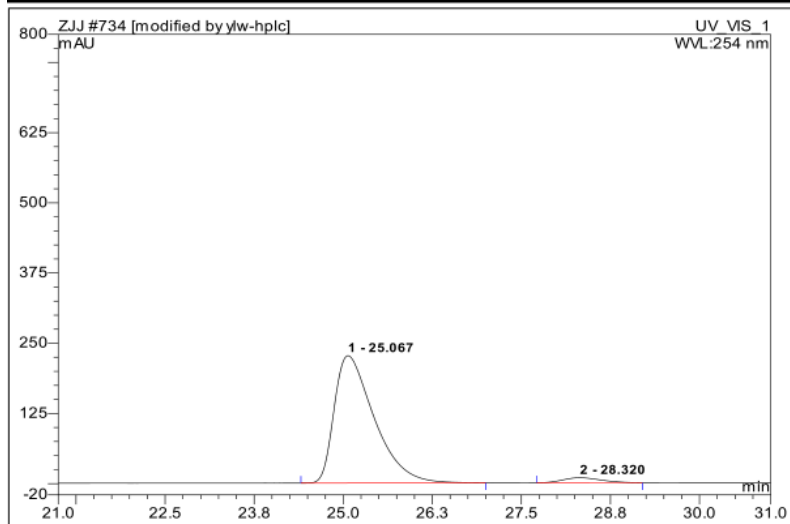

| No.           | Ret.Time min | Peak Name | Height mAU     | Area mAU*min   | Rel.Area %    | Amount n.a.  | Type |
|---------------|--------------|-----------|----------------|----------------|---------------|--------------|------|
| 1             | 25.07        | n.a.      | 226.787        | 147.640        | 96.29         | n.a.         | BMB* |
| 2             | 28.32        | n.a.      | 9.051          | 5.682          | 3.71          | n.a.         | BMB* |
| <b>Total:</b> |              |           | <b>235.838</b> | <b>153.322</b> | <b>100.00</b> | <b>0.000</b> |      |

(-)-6a: IA, *n*-hexane/2-propanol = 95/5,  $v = 1.0 \text{ mL min}^{-1}$ ,  $\lambda = 254 \text{ nm}$

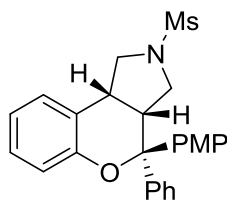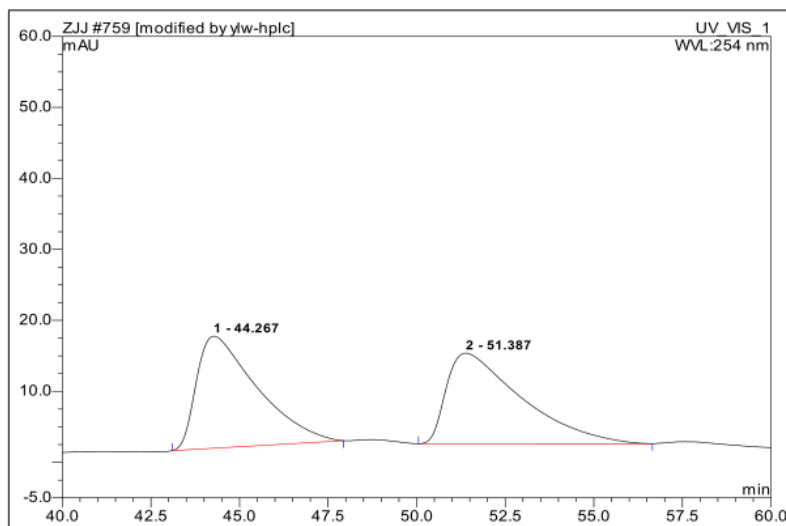

| No.           | Ret.Time<br>min | Peak Name | Height<br>mAU | Area<br>mAU*min | Rel.Area<br>% | Amount<br>n.a. | Type |
|---------------|-----------------|-----------|---------------|-----------------|---------------|----------------|------|
| 1             | 44.27           | n.a.      | 15.778        | 31.160          | 50.08         | n.a.           | BMB* |
| 2             | 51.39           | n.a.      | 12.746        | 31.063          | 49.92         | n.a.           | BMB* |
| <b>Total:</b> |                 |           | 28.524        | 62.223          | 100.00        | 0.000          |      |

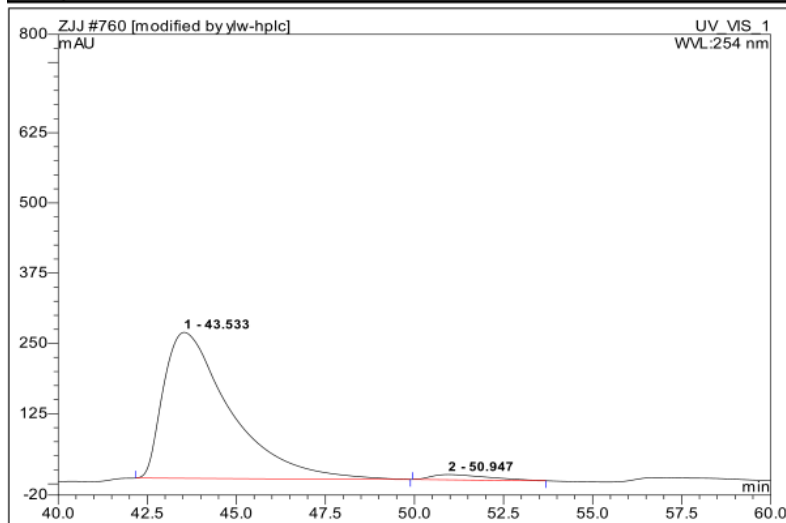

| No.           | Ret.Time<br>min | Peak Name | Height<br>mAU | Area<br>mAU*min | Rel.Area<br>% | Amount<br>n.a. | Type |
|---------------|-----------------|-----------|---------------|-----------------|---------------|----------------|------|
| 1             | 43.53           | n.a.      | 259.710       | 565.065         | 97.06         | n.a.           | BMB* |
| 2             | 50.95           | n.a.      | 9.325         | 17.123          | 2.94          | n.a.           | BMB* |
| <b>Total:</b> |                 |           | 269.035       | 582.188         | 100.00        | 0.000          |      |

7.510  
7.507  
7.491  
7.487  
7.333  
7.328  
7.315  
7.311  
7.278  
7.276  
7.269  
7.264  
7.259  
7.251  
7.248  
7.238  
7.234  
7.229  
7.116  
7.114  
7.097  
7.095  
7.079  
7.076  
7.038  
7.019  
7.001  
6.973  
6.972  
6.953  
6.951  
6.932  
6.930  
6.911  
6.909  
6.815  
6.793

| Parameter                | Value                 |
|--------------------------|-----------------------|
| 1 Title                  | zjj-13-178-Ms-diwu-II |
| 2 Origin                 | Bruker BioSpin GmbH   |
| 3 Solvent                | CDCl3                 |
| 4 Temperature            | 298.0                 |
| 5 Number of Scans        | 12                    |
| 6 Acquisition Time       | 4.0894                |
| 7 Acquisition Date       | 2022-02-12T13:59:52   |
| 8 Spectrometer Frequency | 400.13                |
| 9 Spectral Width         | 8012.8                |

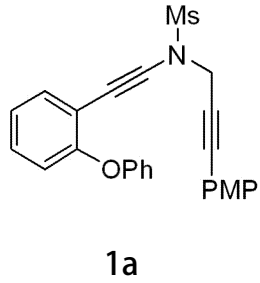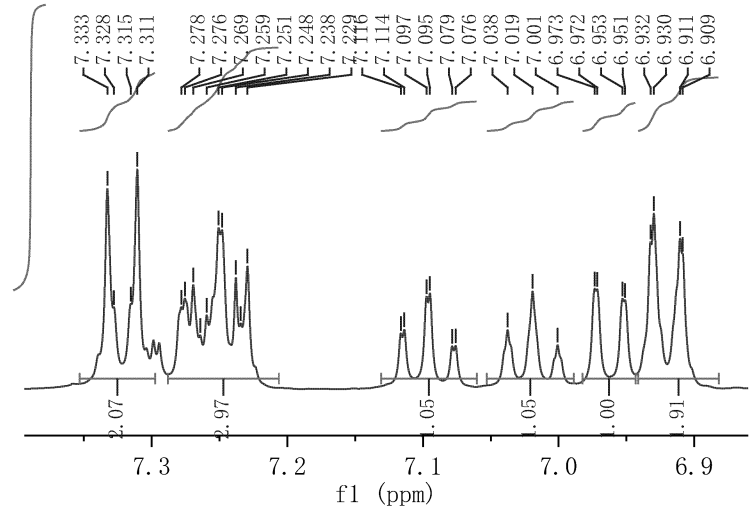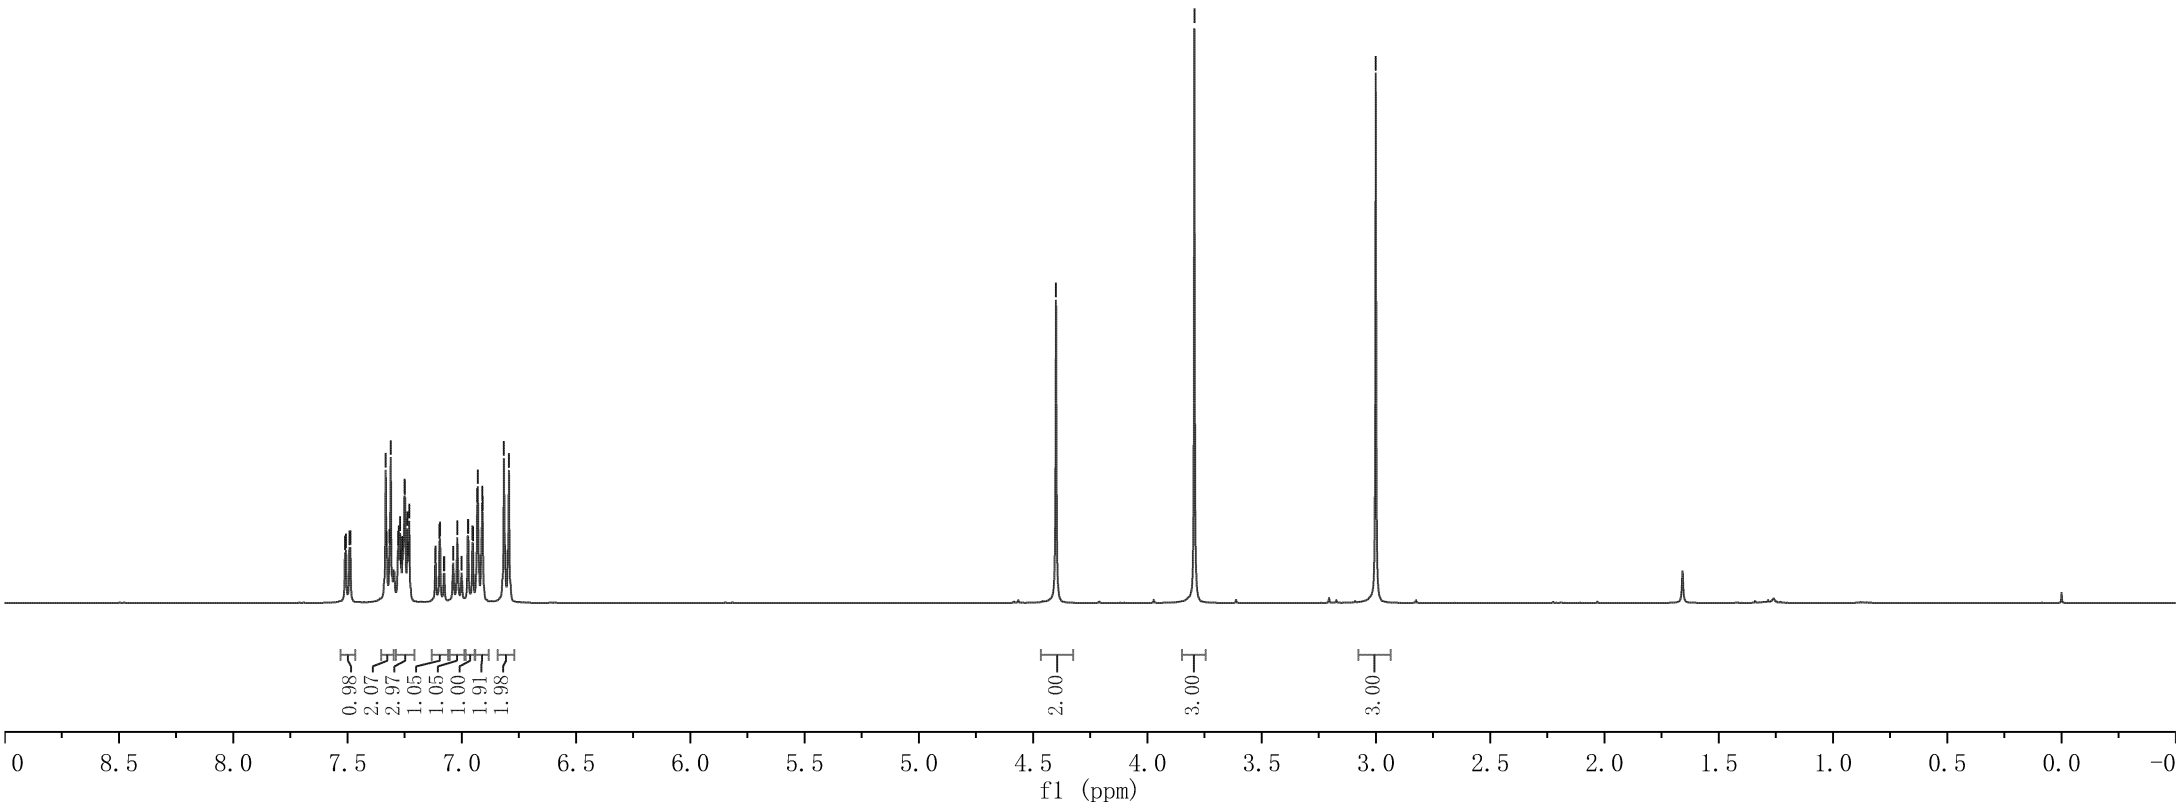



160.01  
157.39  
156.86

133.60  
133.29  
129.68  
129.58  
123.77  
122.72  
119.78  
117.63  
115.30  
113.95  
113.74

86.85  
86.03  
80.09  
77.32  
77.00  
76.68

66.94

55.23

42.97

38.26

| Parameter                | Value                |
|--------------------------|----------------------|
| 1 Title                  | zjj-13-178-Ms-diwu-C |
| 2 Origin                 | Bruker BioSpin GmbH  |
| 3 Solvent                | CDC13                |
| 4 Temperature            | 300.0                |
| 5 Number of Scans        | 58                   |
| 6 Acquisition Time       | 1.3631               |
| 7 Acquisition Date       | 2022-02-12T14:01:39  |
| 8 Spectrometer Frequency | 100.61               |
| 9 Spectral Width         | 24038.5              |

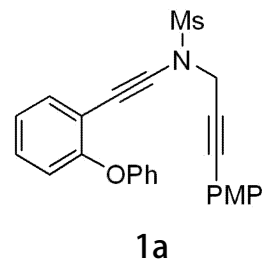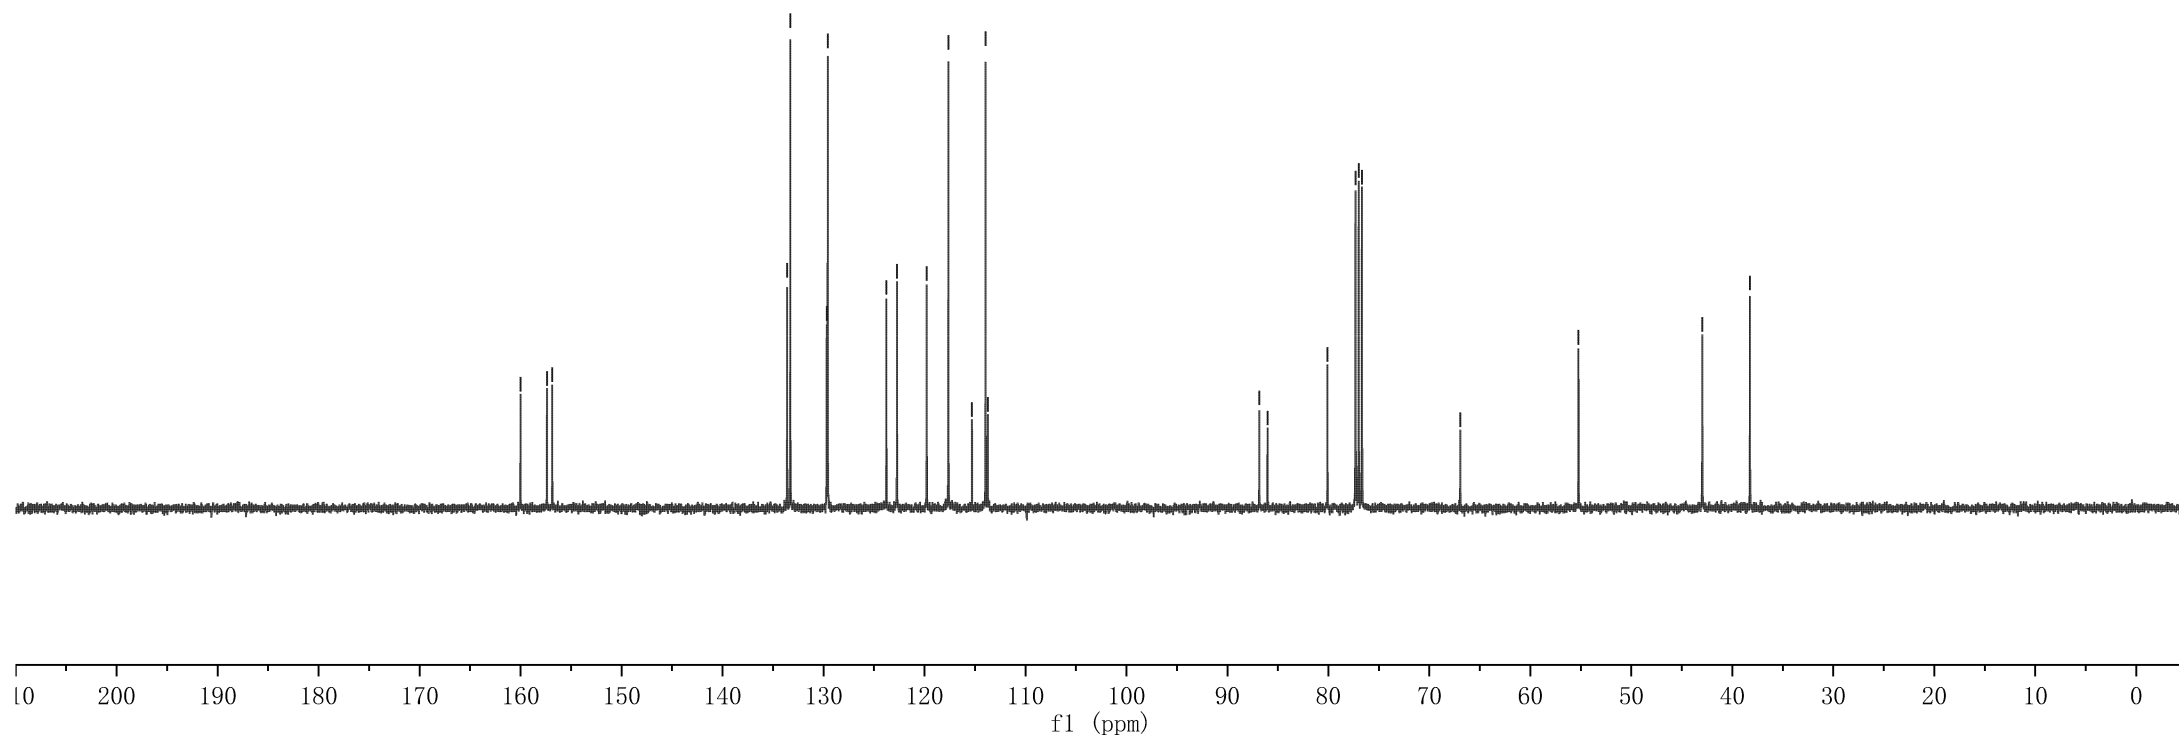

| Parameter                | Value                     |
|--------------------------|---------------------------|
| 1 Title                  | zjj-13-178-Ms-diwu-C-dept |
| 2 Origin                 | Bruker BioSpin GmbH       |
| 3 Solvent                | CDC13                     |
| 4 Temperature            | 300.0                     |
| 5 Number of Scans        | 38                        |
| 6 Acquisition Time       | 1.3631                    |
| 7 Acquisition Date       | 2022-02-12T14:06:47       |
| 8 Spectrometer Frequency | 100.61                    |
| 9 Spectral Width         | 24038.5                   |

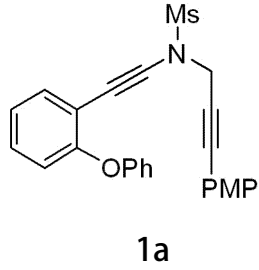

133.73  
133.42  
129.81  
129.71  
123.90  
122.86  
119.91  
117.77  
114.08

55.36

43.10

38.39

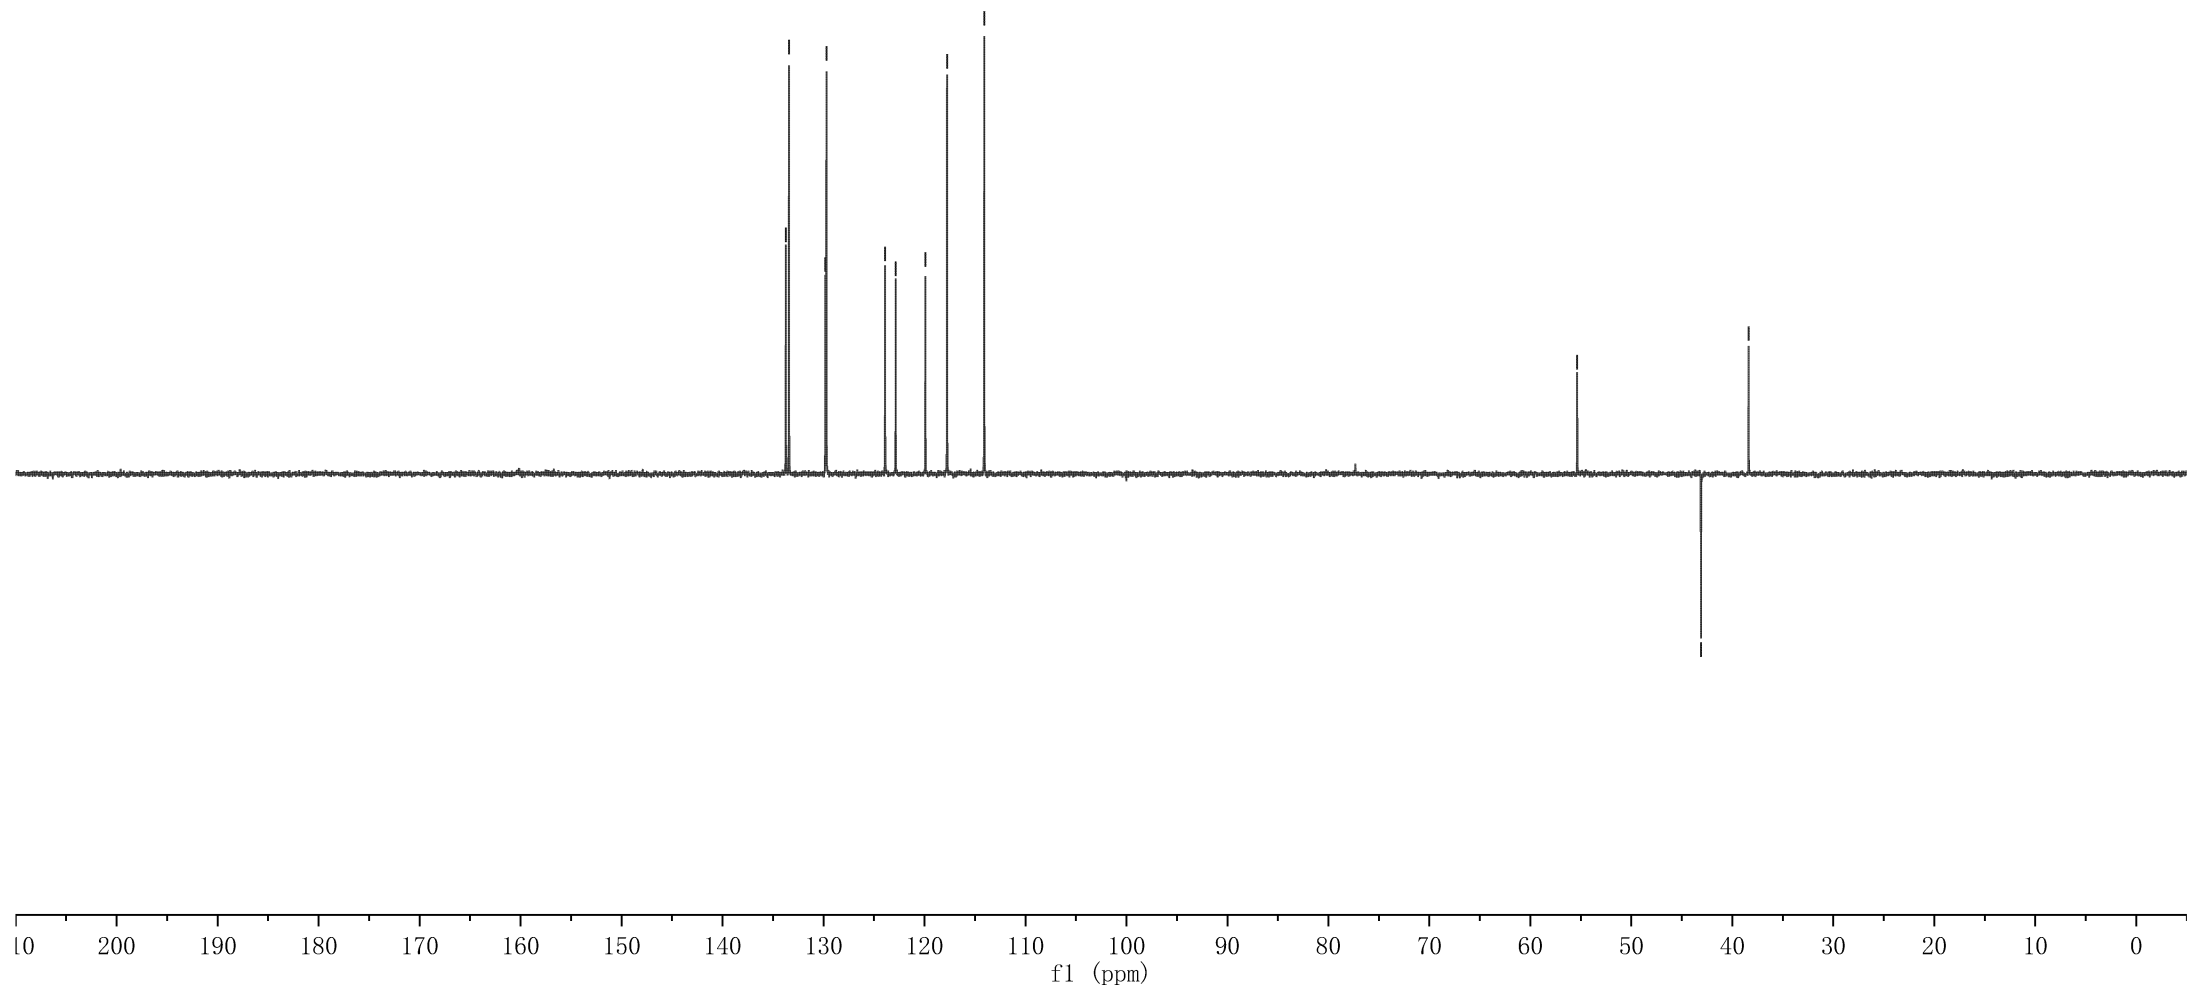



159.84  
157.31  
156.78

133.31  
133.11  
129.46  
129.39  
123.60  
122.66  
119.52  
117.63  
115.39  
113.84  
113.75

86.41  
86.25  
80.45  
77.32  
77.00  
76.68

66.61

55.11  
53.84

42.56

16.66  
12.72

| Parameter                | Value               |
|--------------------------|---------------------|
| 1 Title                  | LFS-2-145-C-nPrSO2  |
| 2 Origin                 |                     |
| 3 Solvent                | CDC13               |
| 4 Temperature            | 297.6               |
| 5 Number of Scans        | 200                 |
| 6 Acquisition Time       | 1.0000              |
| 7 Acquisition Date       | 2022-04-07T11:44:37 |
| 8 Spectrometer Frequency | 100.56              |
| 9 Spectral Width         | 26041.0             |

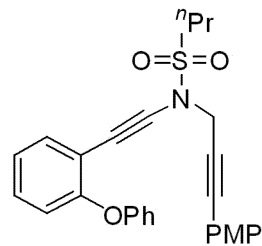

**1b**

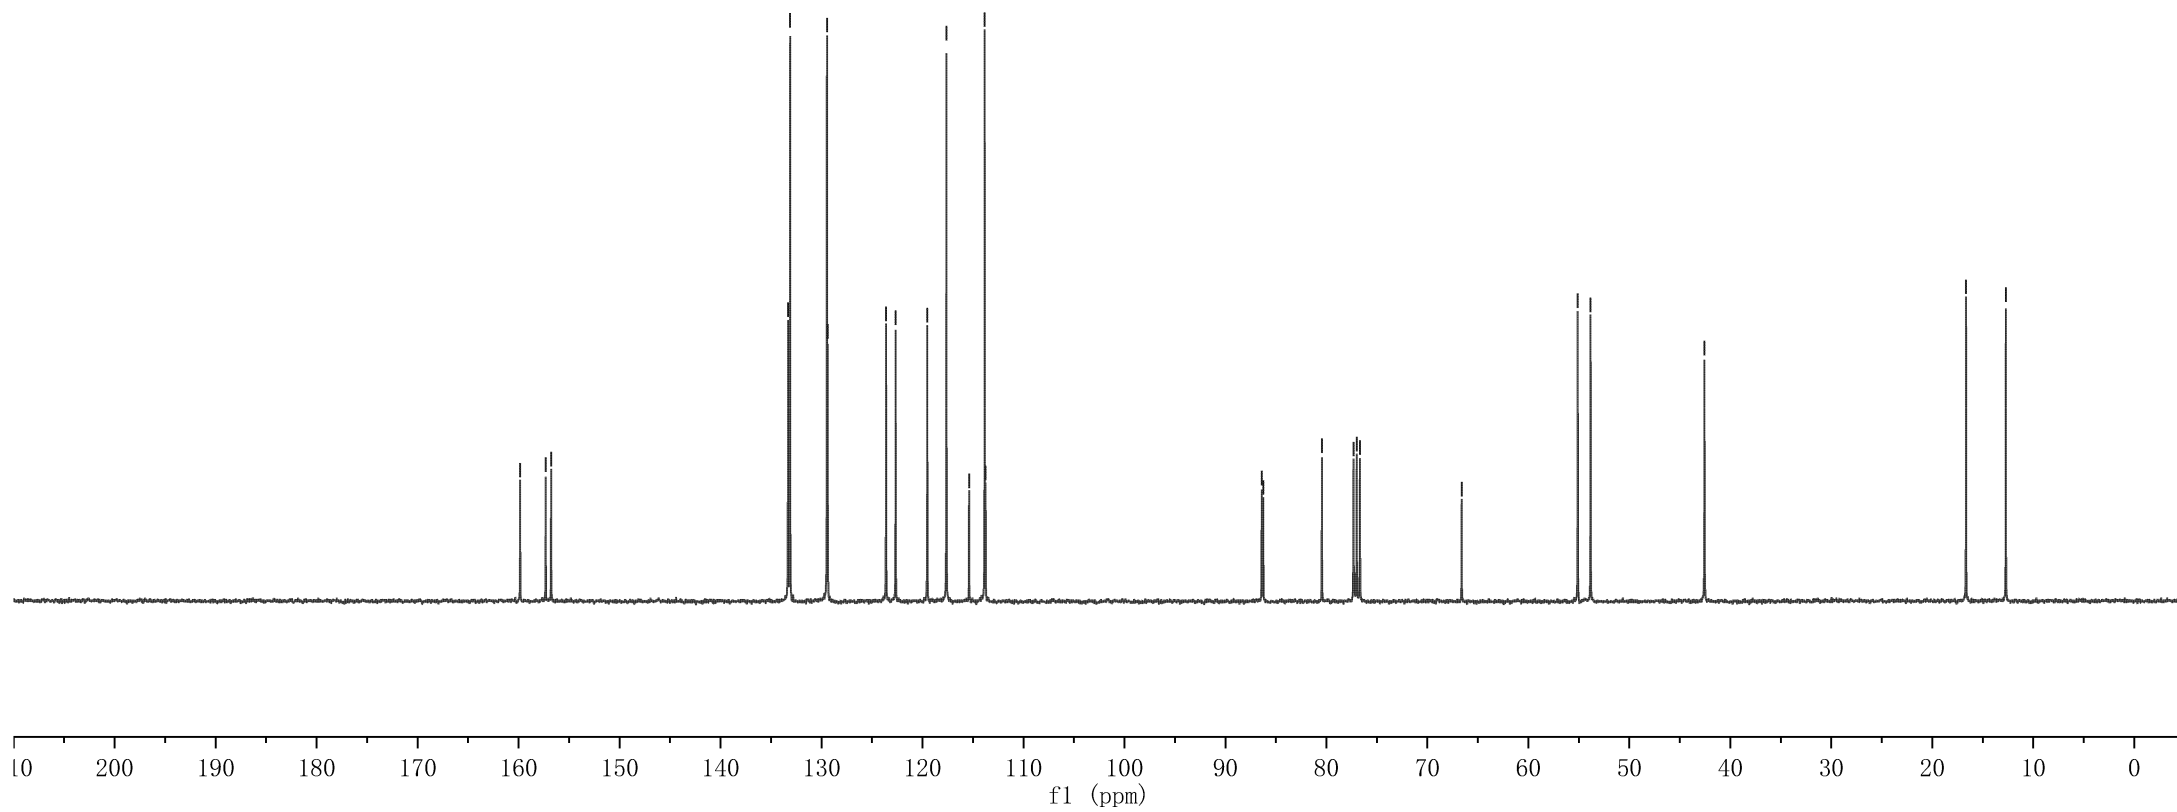

7.480  
7.477  
7.460  
7.457  
7.323  
7.301  
7.267  
7.248  
7.230  
7.219  
7.084  
7.066  
7.047  
7.035  
7.017  
6.999  
6.942  
6.920  
6.910  
6.890  
6.798  
6.776

4.410

3.760  
3.485  
3.468  
3.450  
3.433  
3.416

1.364  
1.347

| Parameter                | Value               |
|--------------------------|---------------------|
| 1 Title                  | LFS-2-146-H-IPrS02  |
| 2 Origin                 |                     |
| 3 Solvent                | CDC13               |
| 4 Temperature            | 297.0               |
| 5 Number of Scans        | 16                  |
| 6 Acquisition Time       | 4.0002              |
| 7 Acquisition Date       | 2022-04-07T11:48:58 |
| 8 Spectrometer Frequency | 399.93              |
| 9 Spectral Width         | 8012.0              |

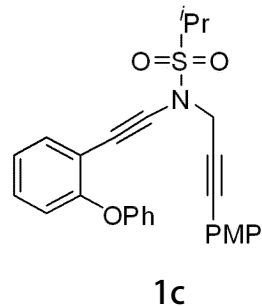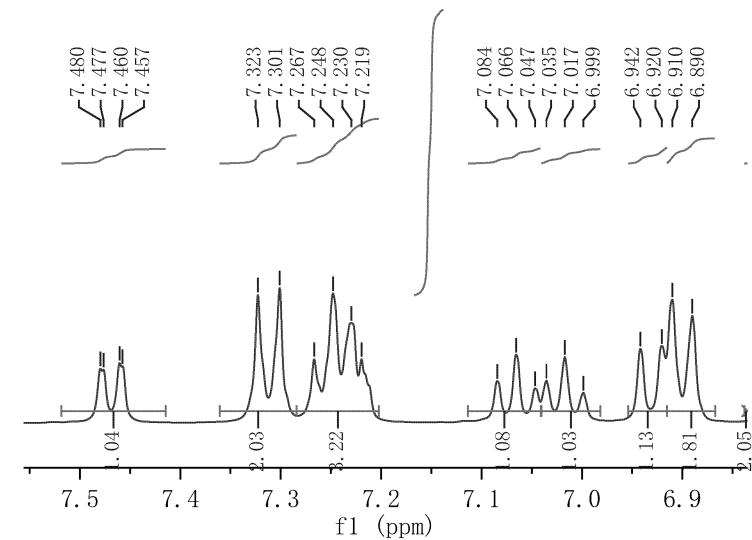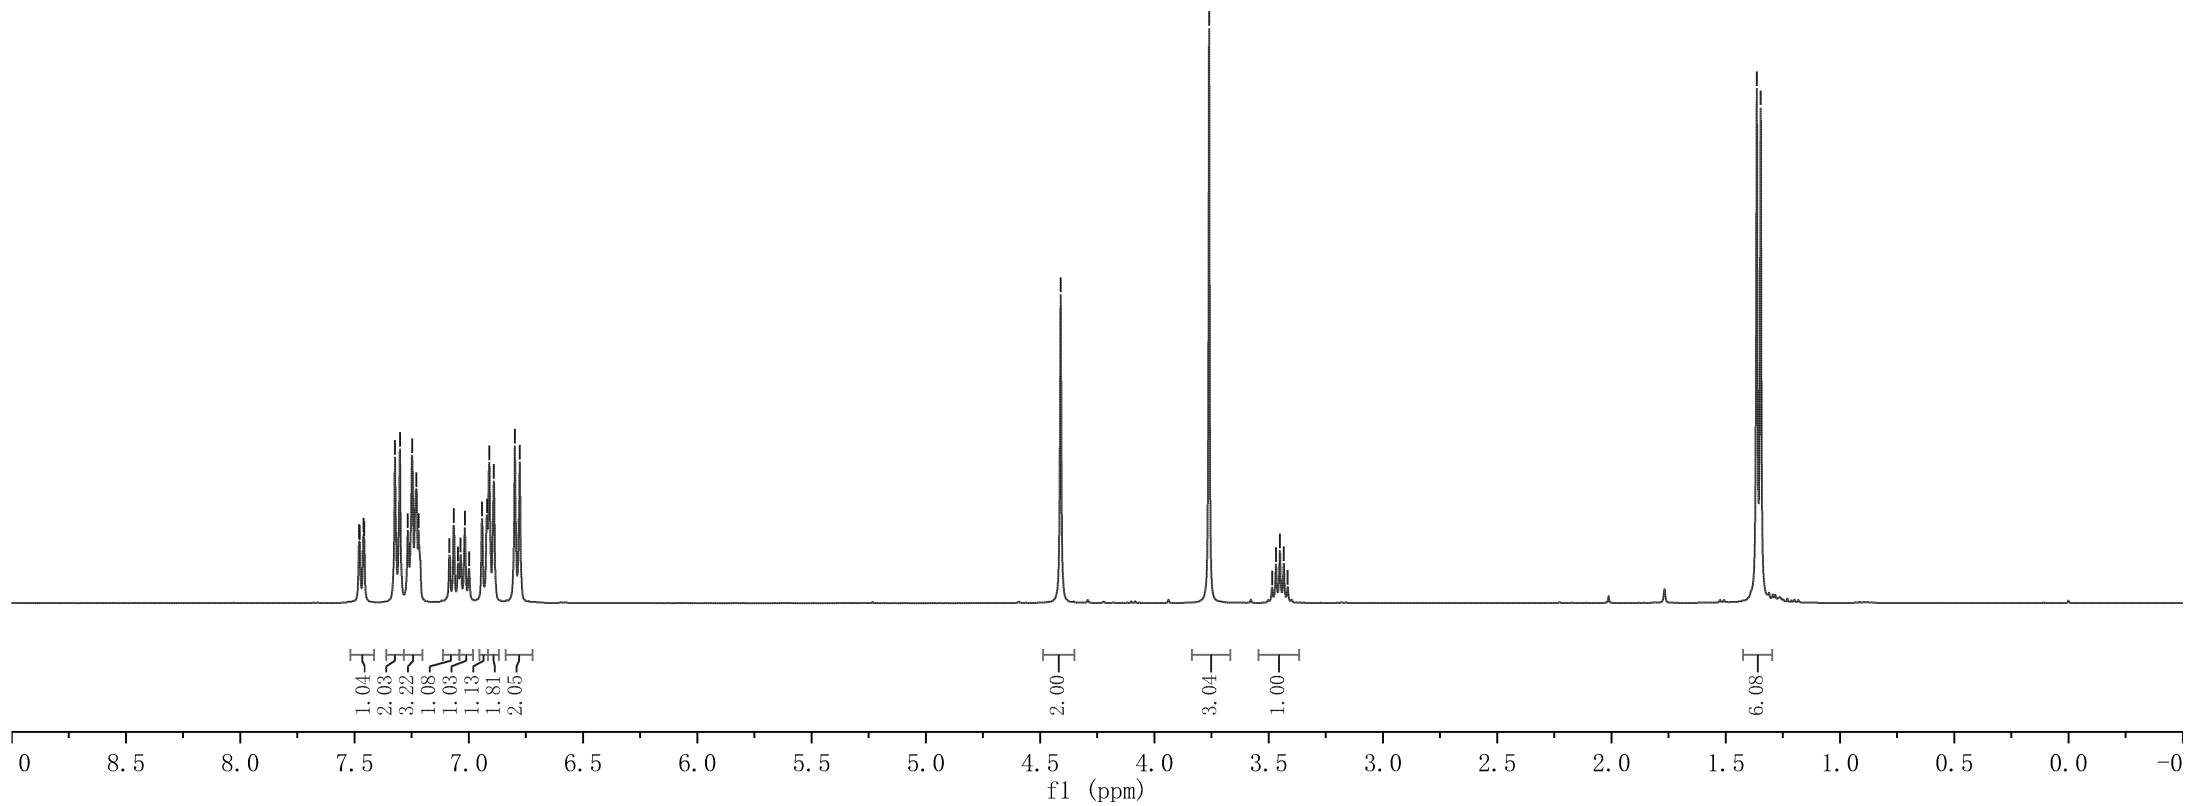

159.78  
157.41  
156.54

133.31  
133.09  
129.42  
129.29  
123.67  
122.49  
119.68  
117.41  
115.66  
113.85  
113.80

86.55  
86.22  
80.60  
77.32  
77.00  
76.68

66.38

55.09  
54.65

42.61

16.21

| Parameter                | Value               |
|--------------------------|---------------------|
| 1 Title                  | LFS-2-146-C-IPrS02  |
| 2 Origin                 |                     |
| 3 Solvent                | CDC13               |
| 4 Temperature            | 297.0               |
| 5 Number of Scans        | 200                 |
| 6 Acquisition Time       | 1.0000              |
| 7 Acquisition Date       | 2022-04-07T11:58:06 |
| 8 Spectrometer Frequency | 100.56              |
| 9 Spectral Width         | 26041.0             |

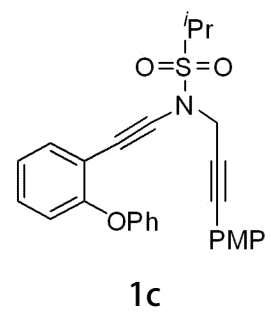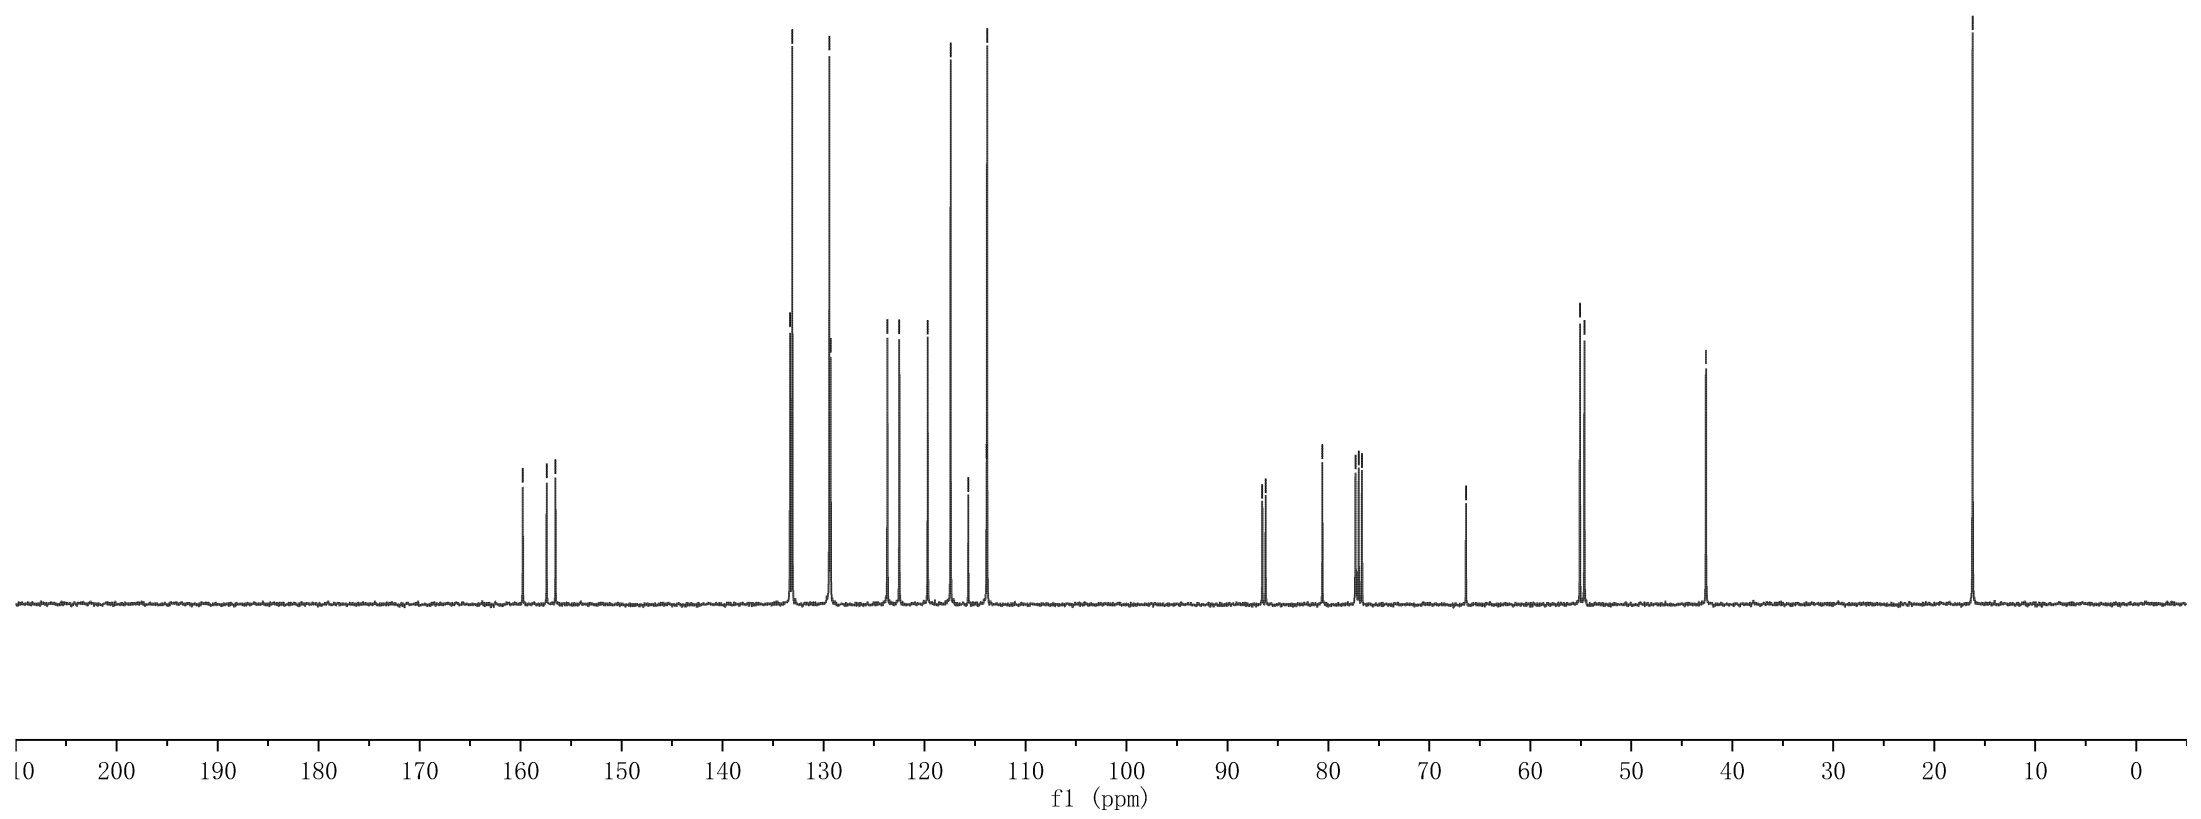

7.785  
7.766  
7.463  
7.446  
7.346  
7.327  
7.253  
7.130  
7.113  
7.095  
7.076  
7.058  
7.022  
7.002  
6.960  
6.942  
6.898  
6.878  
6.764  
6.744

4.440

3.797

| Parameter                | Value                |
|--------------------------|----------------------|
| 1 Title                  | zjj-13-226-Bs-diwu-H |
| 2 Origin                 | Bruker BioSpin GmbH  |
| 3 Solvent                | CDC13                |
| 4 Temperature            | 298.0                |
| 5 Number of Scans        | 11                   |
| 6 Acquisition Time       | 4.0894               |
| 7 Acquisition Date       | 2022-03-27T17:23:08  |
| 8 Spectrometer Frequency | 400.13               |
| 9 Spectral Width         | 8012.8               |

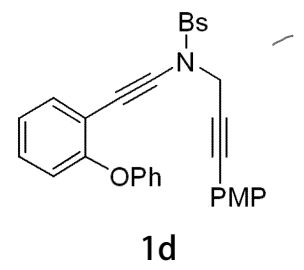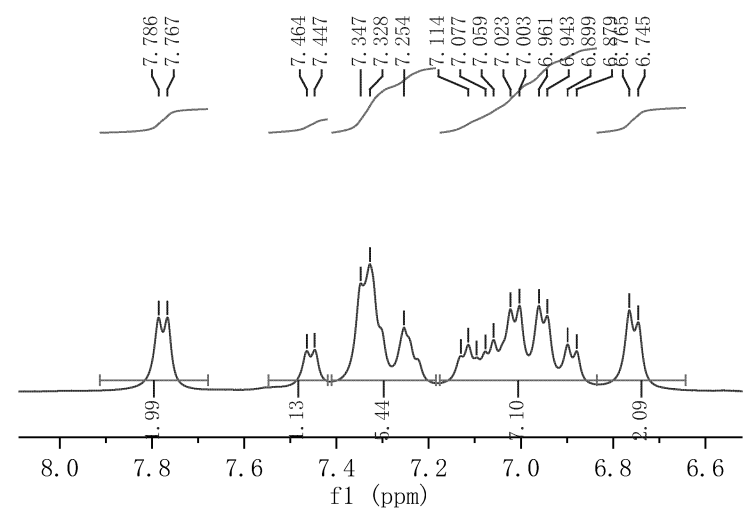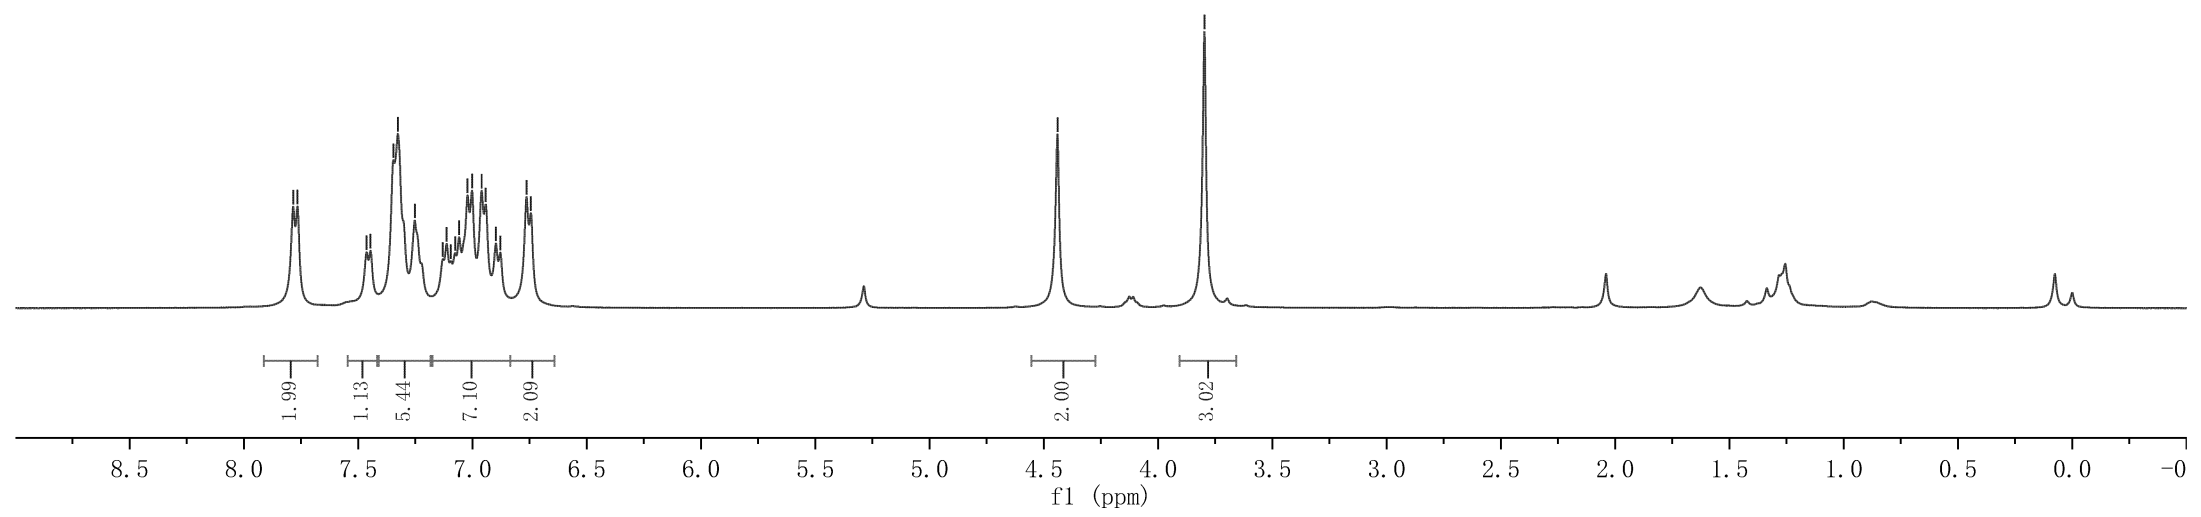

159.80  
157.42  
157.22

136.22  
133.45  
133.10  
132.02  
129.76  
129.67  
129.48  
128.86  
123.36  
123.25  
118.91  
118.52  
114.94  
113.85  
113.80

86.85  
85.80  
79.40  
77.32  
77.00  
76.68

67.09

55.26

43.27

| Parameter                | Value                |
|--------------------------|----------------------|
| 1 Title                  | zjj-13-226-Bs-diwu-C |
| 2 Origin                 | Bruker BioSpin GmbH  |
| 3 Solvent                | CDC13                |
| 4 Temperature            | 300.0                |
| 5 Number of Scans        | 77                   |
| 6 Acquisition Time       | 1.3631               |
| 7 Acquisition Date       | 2022-03-27T17:25:08  |
| 8 Spectrometer Frequency | 100.61               |
| 9 Spectral Width         | 24038.5              |

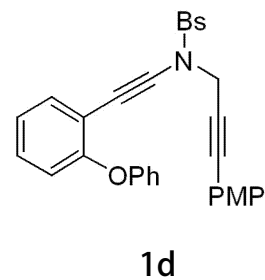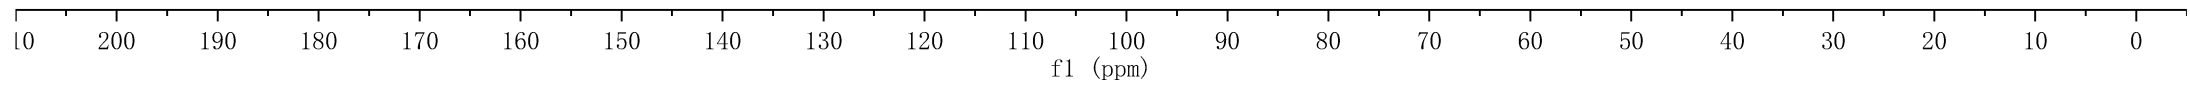



8.095  
8.073  
7.938  
7.916  
7.481  
7.478  
7.462  
7.458  
7.360  
7.340  
7.321  
7.276  
7.272  
7.254  
7.242  
7.233  
7.161  
7.143  
7.125  
7.083  
7.065  
7.046  
6.978  
6.957  
6.935  
6.891  
6.871  
6.688  
6.666

| Parameter                | Value               |
|--------------------------|---------------------|
| 1 Title                  | zjj-14-2-sub-4-Ns-H |
| 2 Origin                 | Bruker BioSpin GmbH |
| 3 Solvent                | CDC13               |
| 4 Temperature            | 298.0               |
| 5 Number of Scans        | 4                   |
| 6 Acquisition Time       | 4.0894              |
| 7 Acquisition Date       | 2022-04-07T15:09:10 |
| 8 Spectrometer Frequency | 400.13              |
| 9 Spectral Width         | 8012.8              |

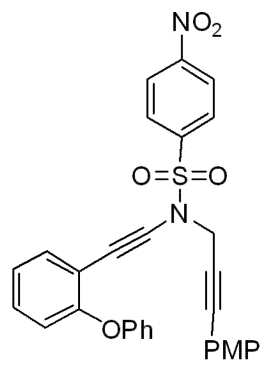

1e

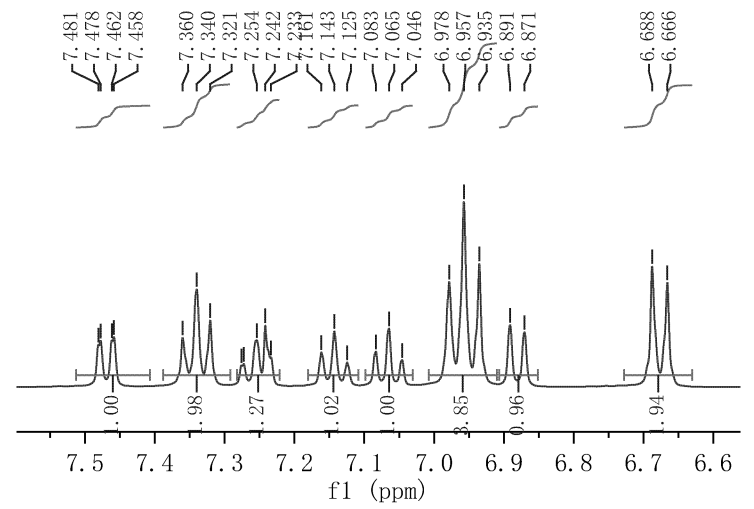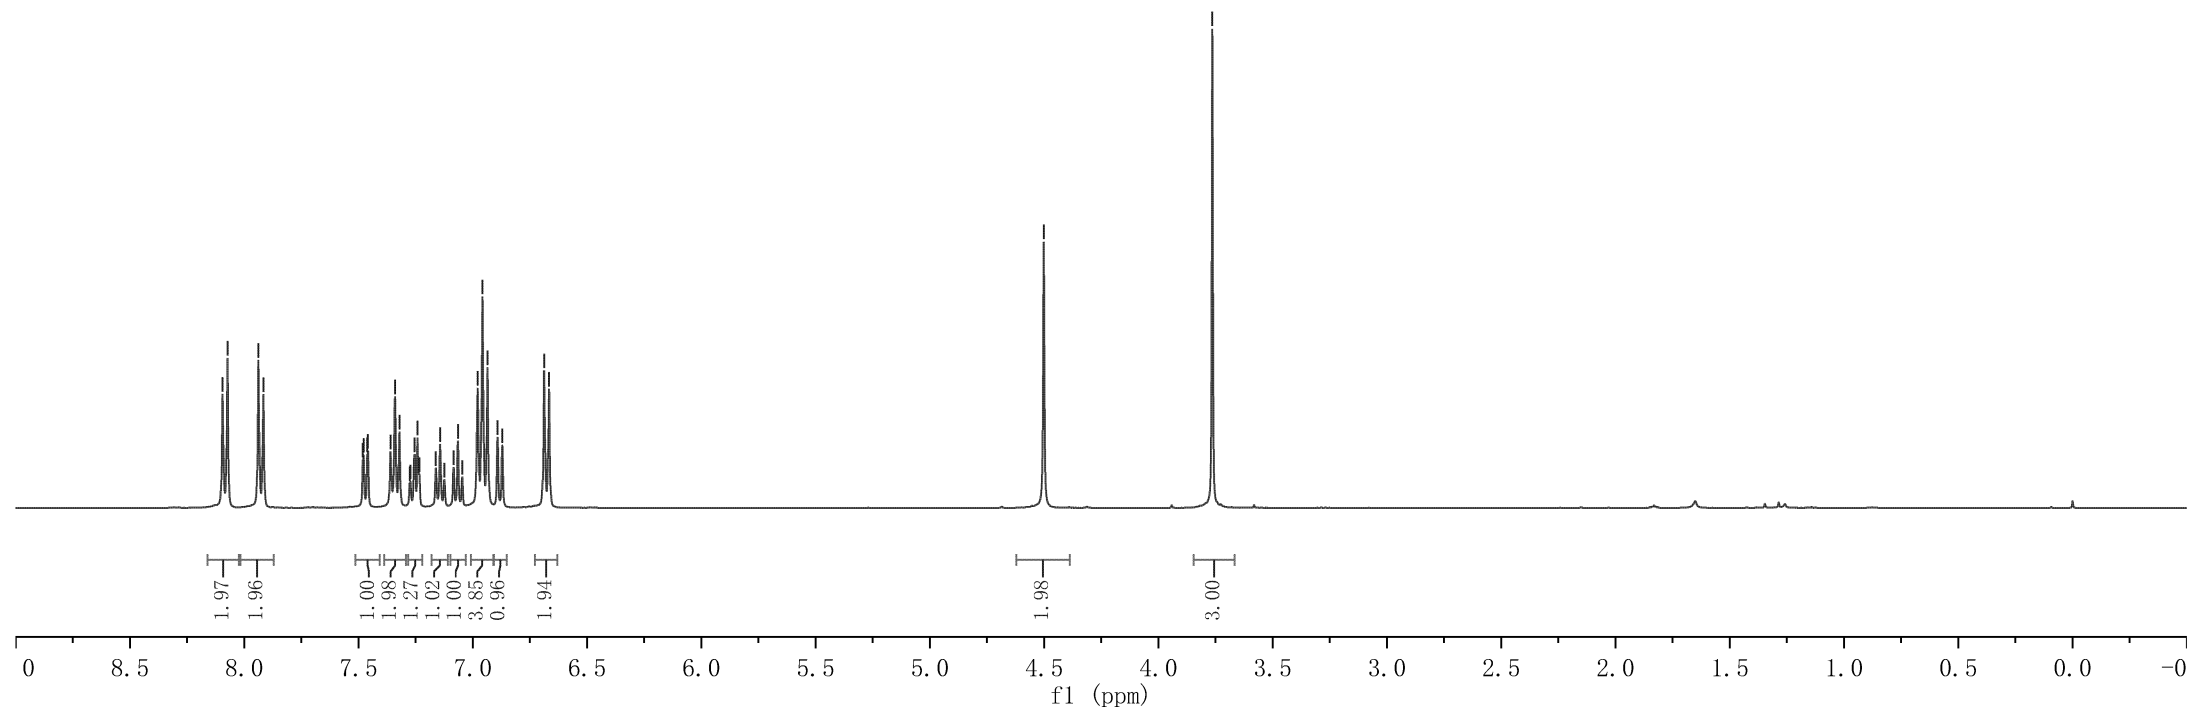

| Parameter                | Value               |
|--------------------------|---------------------|
| 1 Title                  | zjj-14-2-sub-4-Ns-C |
| 2 Origin                 | Bruker BioSpin GmbH |
| 3 Solvent                | CDC13               |
| 4 Temperature            | 300.0               |
| 5 Number of Scans        | 8                   |
| 6 Acquisition Time       | 1.3631              |
| 7 Acquisition Date       | 2022-04-07T15:10:34 |
| 8 Spectrometer Frequency | 100.61              |
| 9 Spectral Width         | 24038.5             |

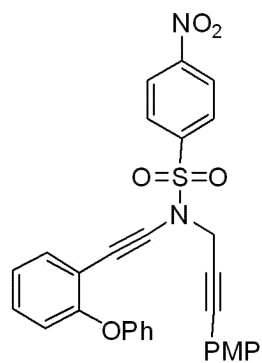

1e

159.95  
157.62  
157.00

150.14

142.50

133.48

132.89

129.86

129.82

129.41

123.72

118.74

118.50

114.35

113.81

113.24

87.23

85.04

79.15

77.32

77.00

76.68

67.27

55.21

43.60

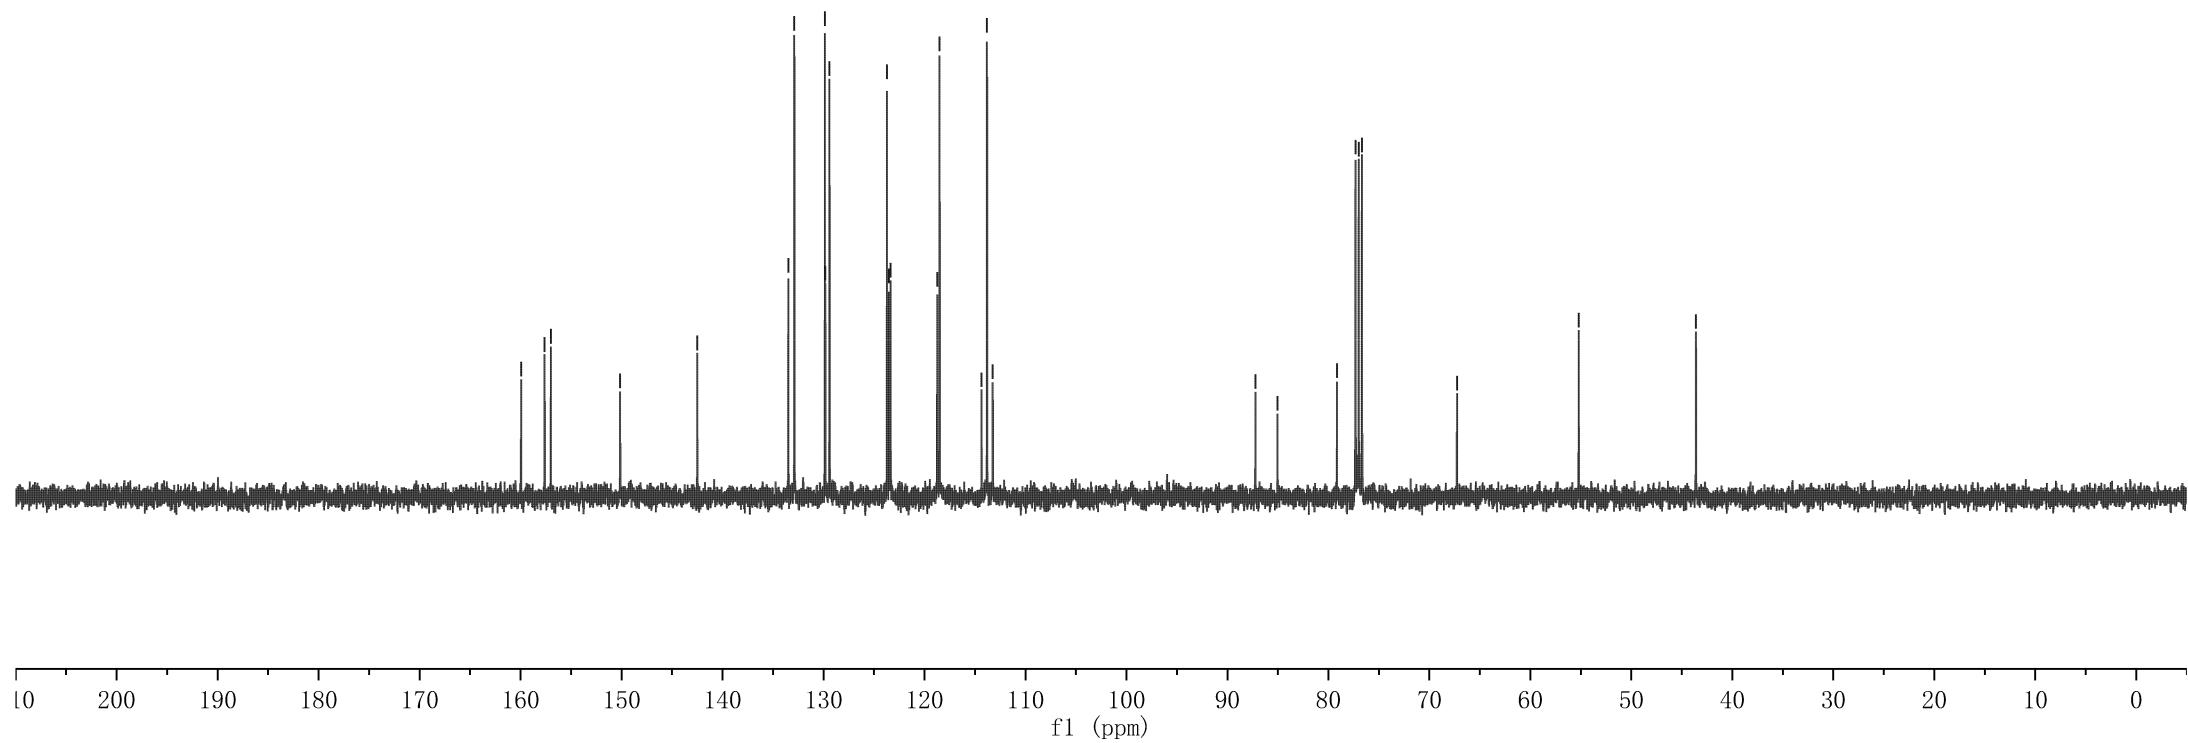

8.064  
8.044  
7.472  
7.469  
7.453  
7.449  
7.424  
7.403  
7.322  
7.302  
7.282  
7.241  
7.237  
7.219  
7.212  
7.202  
7.198  
7.121  
7.103  
7.084  
7.057  
7.038  
7.020  
6.960  
6.940  
6.934  
6.912  
6.877  
6.856  
6.699  
6.678

| Parameter                | Value               |
|--------------------------|---------------------|
| 1 Title                  | LFS-2-141-H         |
| 2 Origin                 |                     |
| 3 Solvent                | CDC13               |
| 4 Temperature            | 296.8               |
| 5 Number of Scans        | 16                  |
| 6 Acquisition Time       | 4.0002              |
| 7 Acquisition Date       | 2022-04-05T18:49:34 |
| 8 Spectrometer Frequency | 399.93              |
| 9 Spectral Width         | 8012.0              |

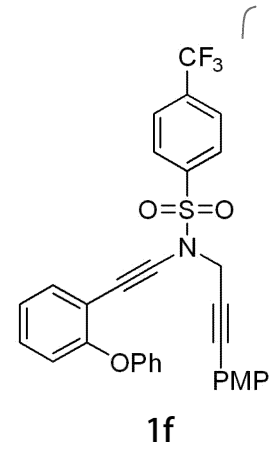

4.474  
3.741

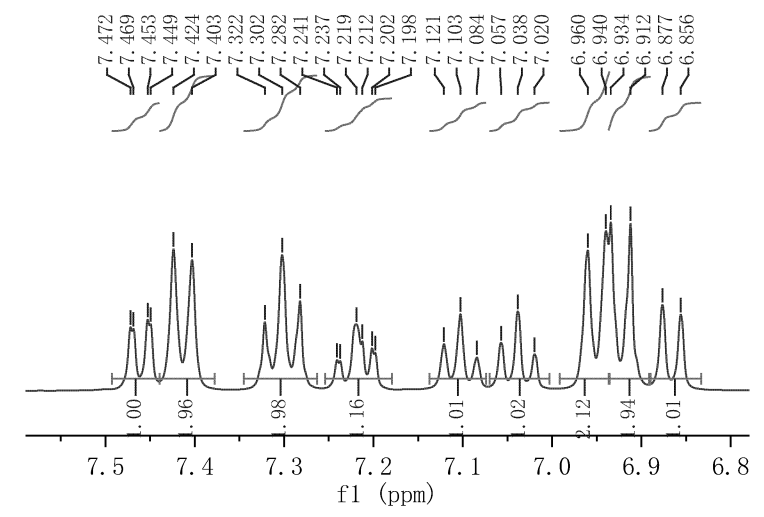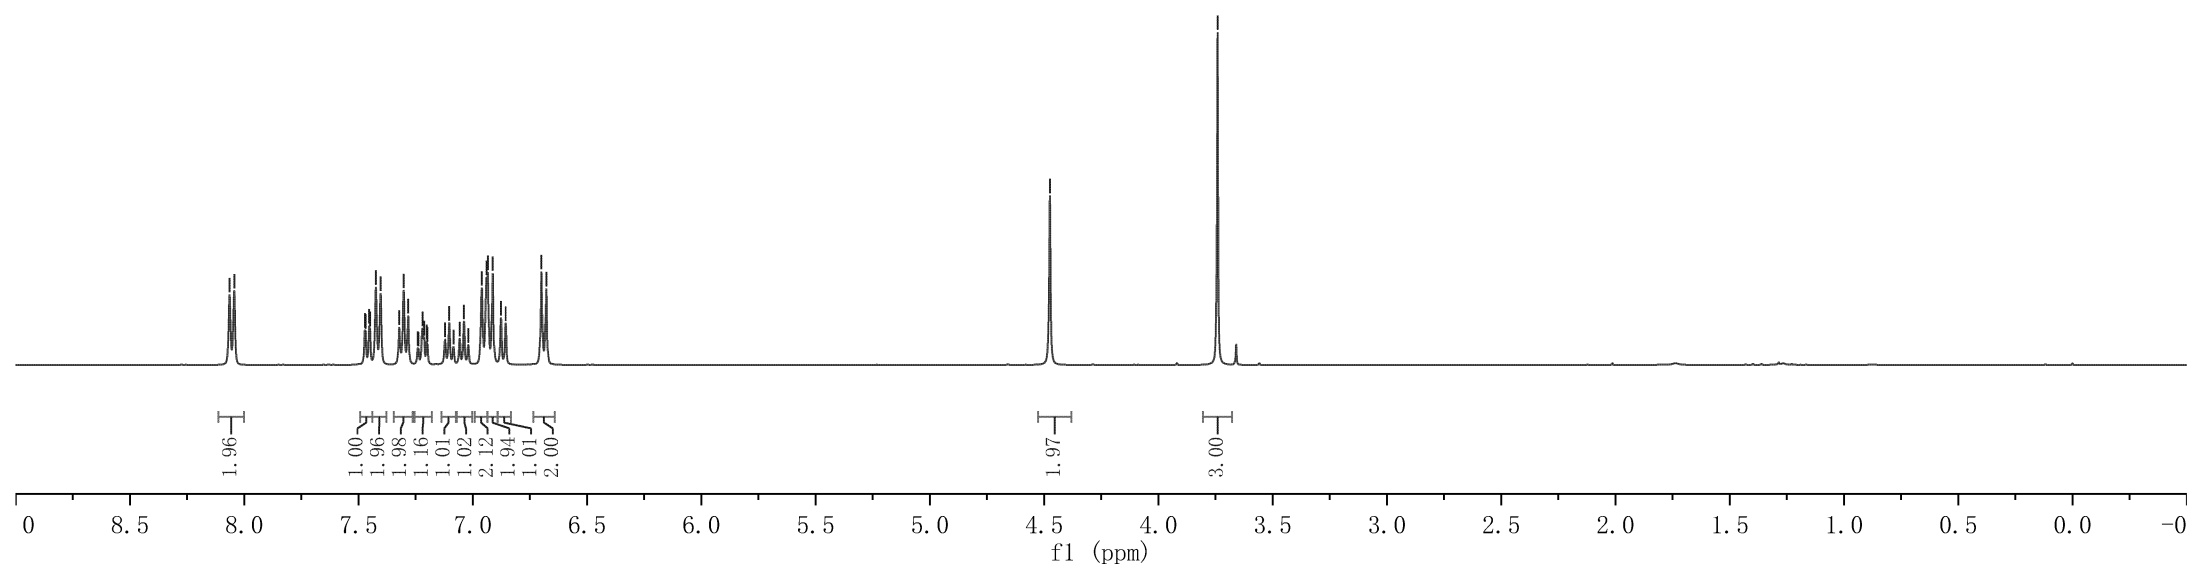

| Parameter                | Value               |
|--------------------------|---------------------|
| 1 Title                  | LFS-2-141-C         |
| 2 Origin                 |                     |
| 3 Solvent                | CDC13               |
| 4 Temperature            | 295.8               |
| 5 Number of Scans        | 200                 |
| 6 Acquisition Time       | 1.0000              |
| 7 Acquisition Date       | 2022-04-05T18:58:30 |
| 8 Spectrometer Frequency | 100.56              |
| 9 Spectral Width         | 26041.0             |

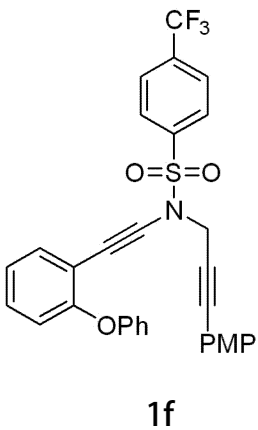

159.81  
157.49  
157.05

140.56  
135.09  
134.76  
134.43  
134.10  
133.40  
132.86  
129.73  
129.60  
128.66  
127.02  
125.71  
125.68  
124.31  
123.29  
121.59  
118.87  
118.71  
118.47  
114.57  
113.66  
113.40

86.95  
85.39  
79.10  
77.32  
77.00  
76.68

67.03

55.08

43.31

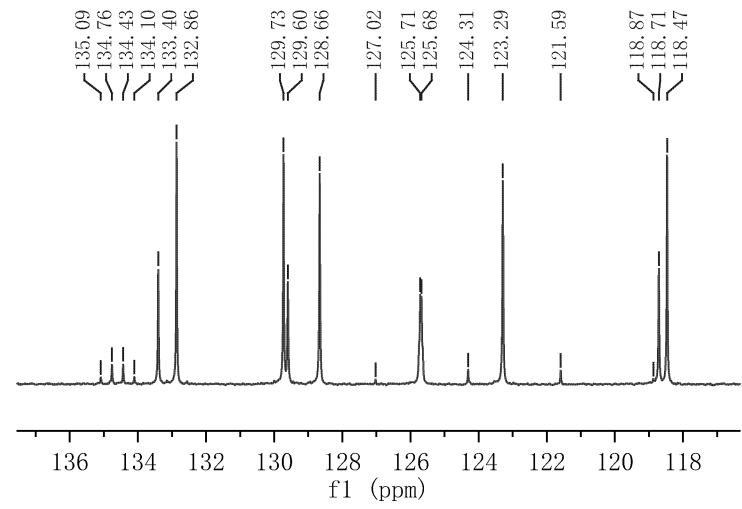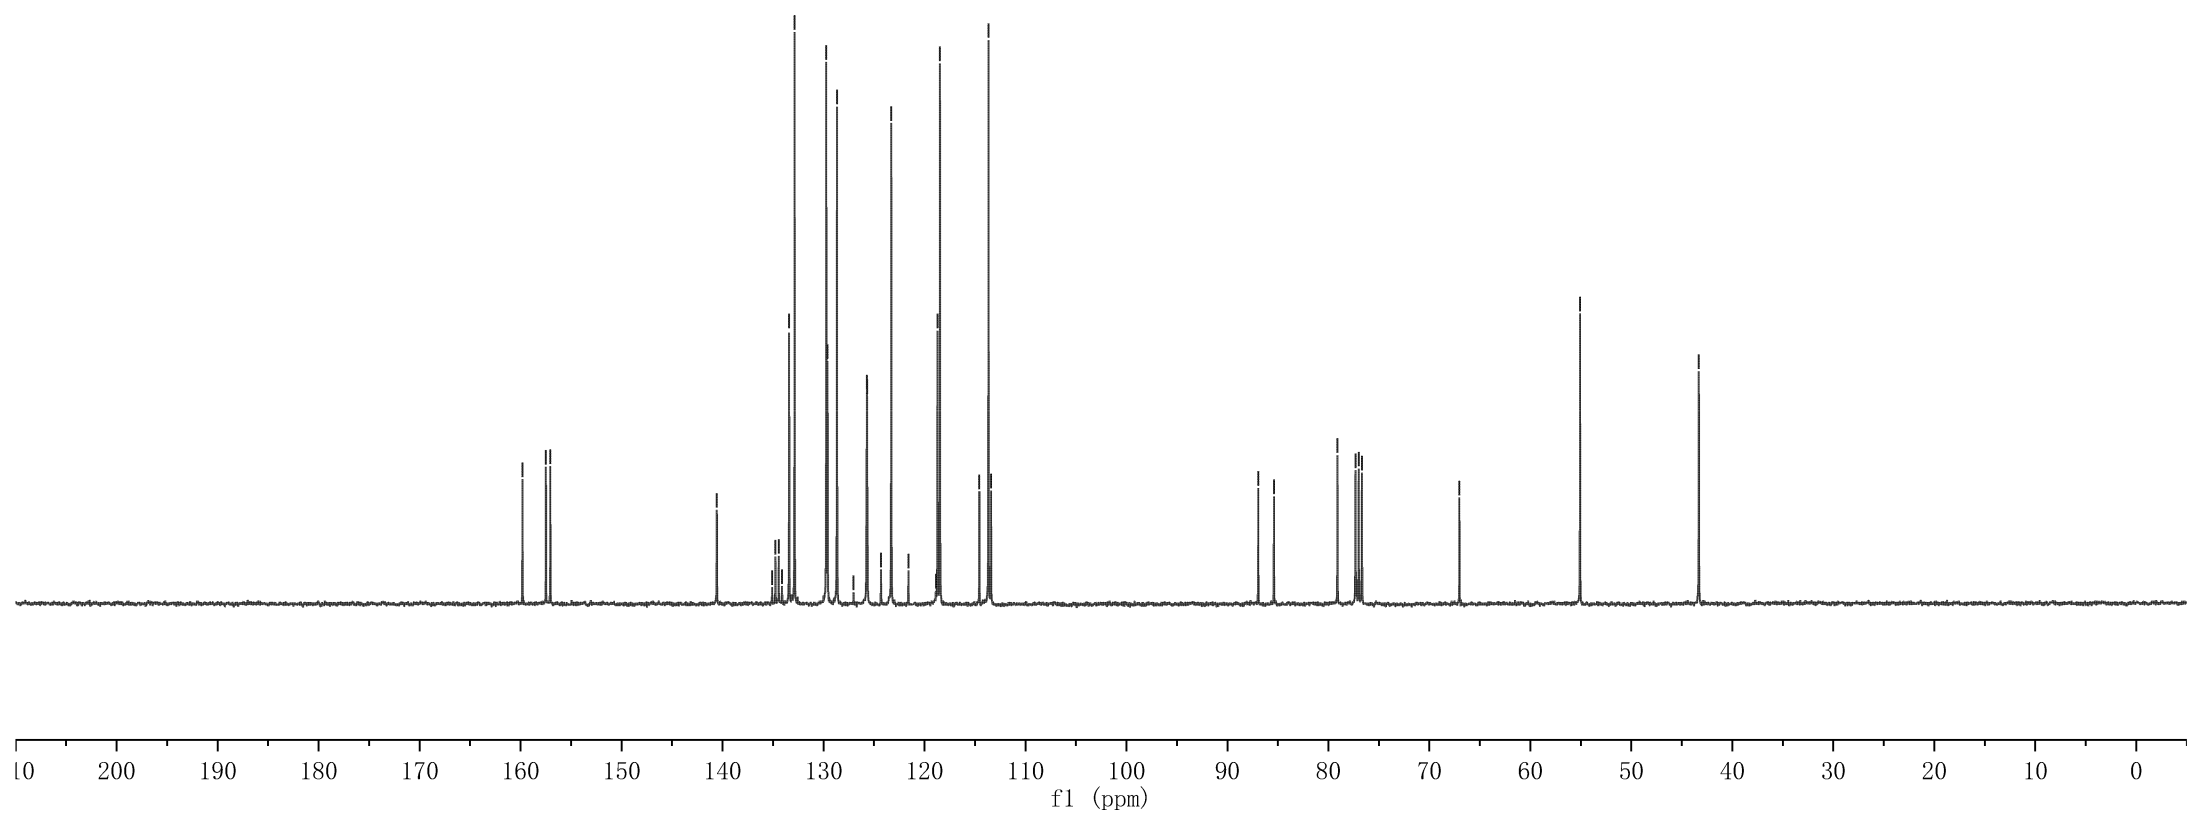

| Parameter                | Value               |
|--------------------------|---------------------|
| 1 Title                  | zjj-14-CF3-sub-F    |
| 2 Origin                 | Bruker BioSpin GmbH |
| 3 Solvent                | CDC13               |
| 4 Temperature            | 295.6               |
| 5 Number of Scans        | 11                  |
| 6 Acquisition Time       | 0.7340              |
| 7 Acquisition Date       | 2022-04-07T10:27:47 |
| 8 Spectrometer Frequency | 376.31              |
| 9 Spectral Width         | 89285.7             |

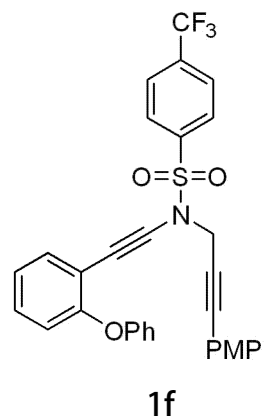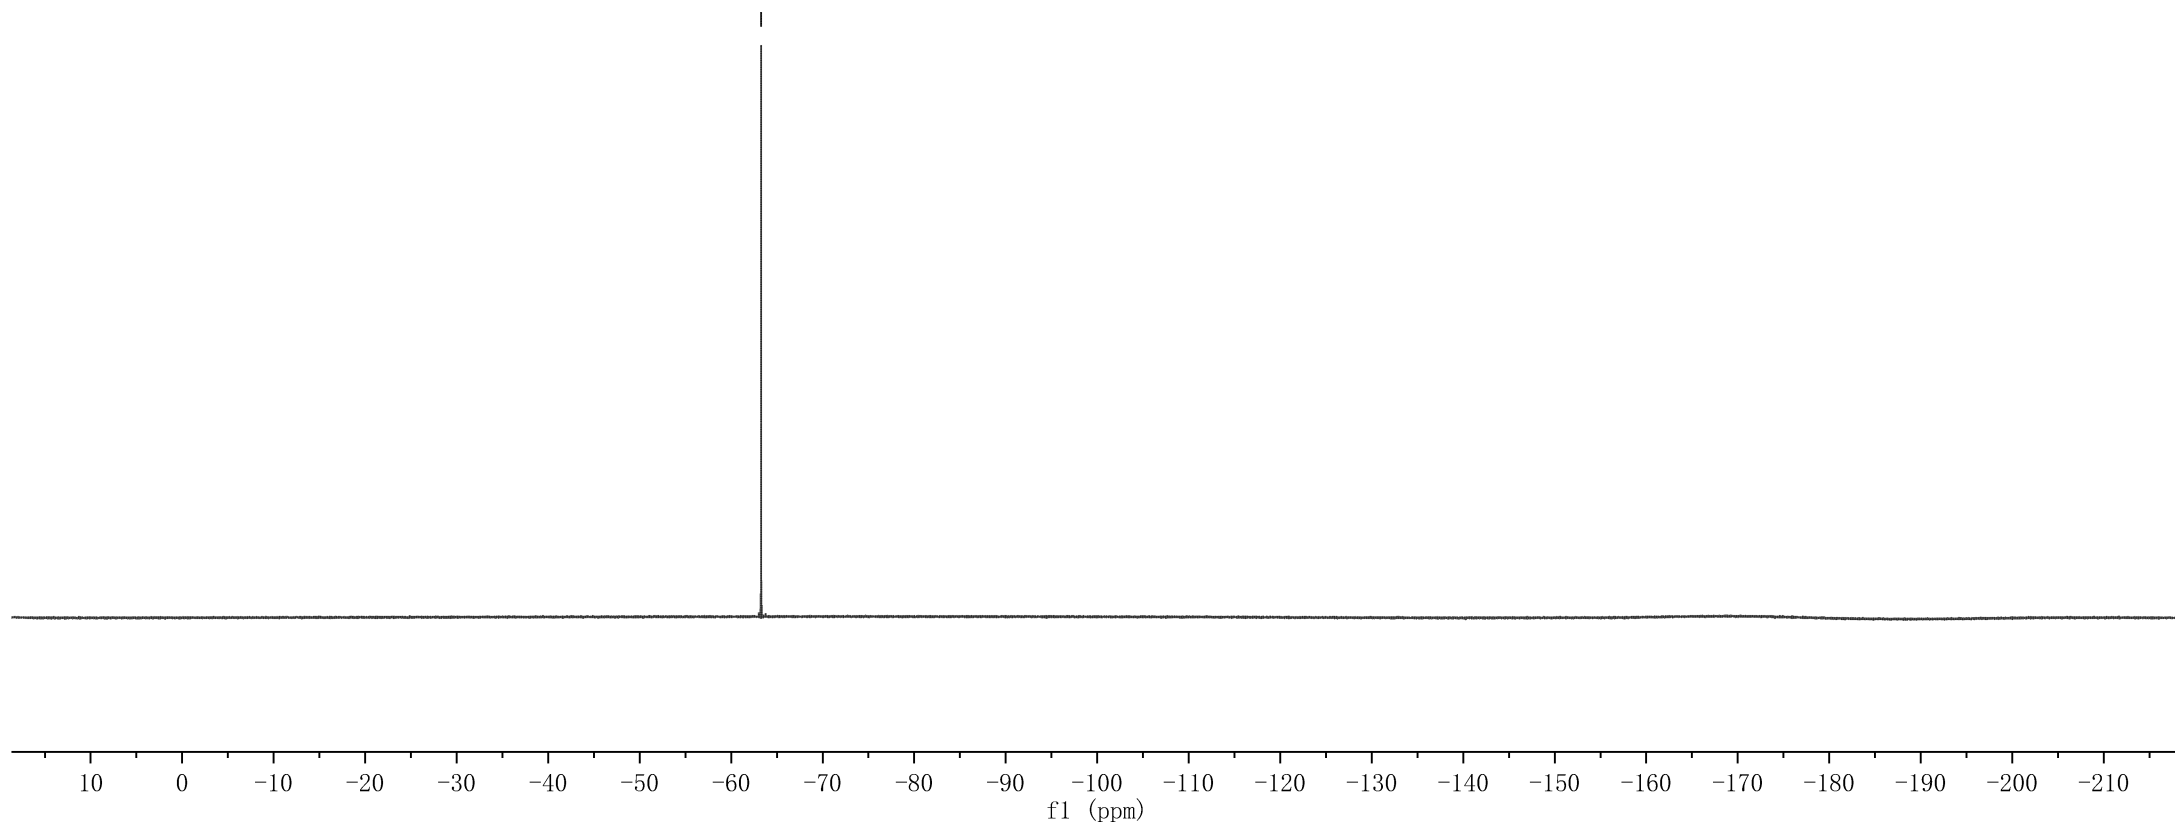

7.816  
7.801  
7.448  
7.434  
7.289  
7.203  
7.047  
7.034  
6.953  
6.876  
6.859  
6.724  
6.708

4.390

3.761

2.245

| Parameter                | Value               |
|--------------------------|---------------------|
| 1 Title                  | zjj-13-Ts-H-re      |
| 2 Origin                 | Bruker BioSpin GmbH |
| 3 Solvent                | CDC13               |
| 4 Temperature            | 298.0               |
| 5 Number of Scans        | 7                   |
| 6 Acquisition Time       | 4.0894              |
| 7 Acquisition Date       | 2022-03-28T15:52:50 |
| 8 Spectrometer Frequency | 400.13              |
| 9 Spectral Width         | 8012.8              |

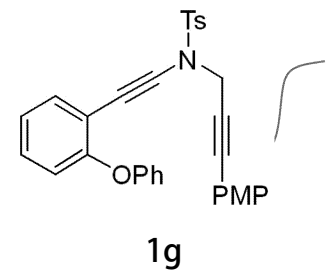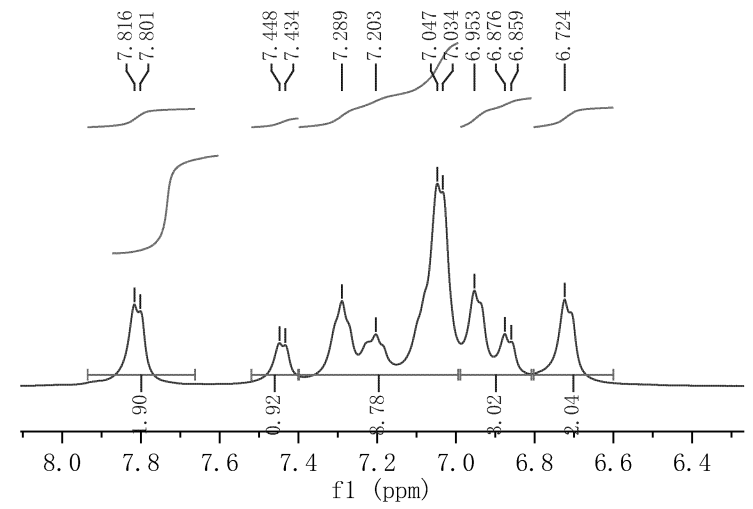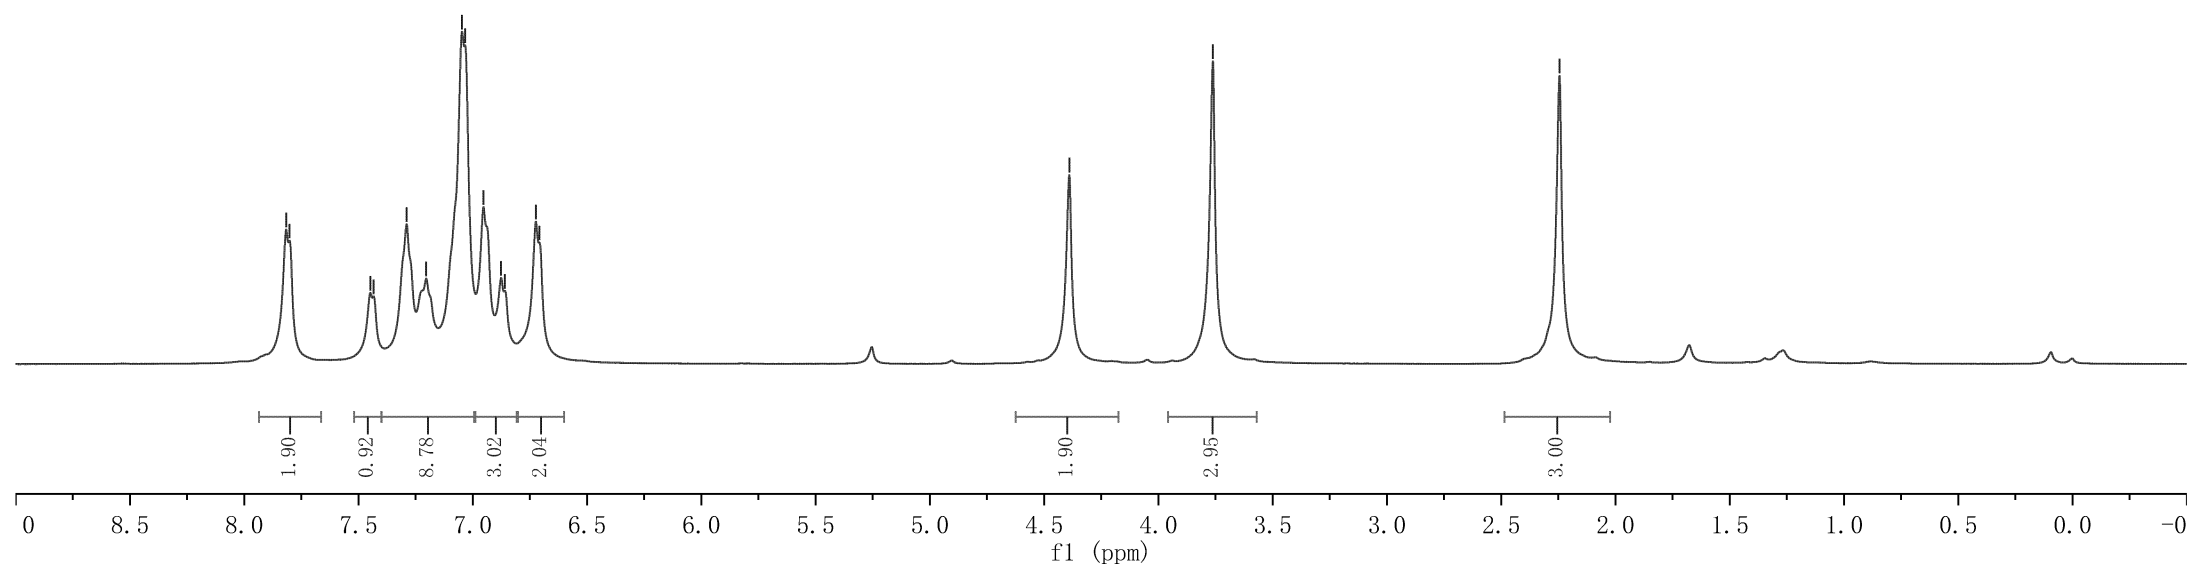

| Parameter                | Value               |
|--------------------------|---------------------|
| 1 Title                  | zjj-13-Ts-C-re      |
| 2 Origin                 | Bruker BioSpin GmbH |
| 3 Solvent                | CDC13               |
| 4 Temperature            | 300.0               |
| 5 Number of Scans        | 15                  |
| 6 Acquisition Time       | 1.3631              |
| 7 Acquisition Date       | 2022-03-28T15:53:54 |
| 8 Spectrometer Frequency | 100.61              |
| 9 Spectral Width         | 24038.5             |

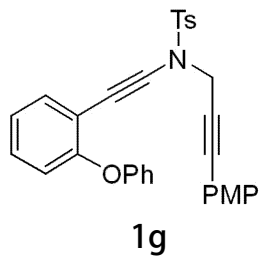

159.59 — 157.19 —  
 144.46 —  
 134.18 —  
 133.31 —  
 133.04 —  
 129.57 —  
 129.33 —  
 129.13 —  
 128.11 —  
 123.23 —  
 123.03 —  
 118.78 —  
 118.48 —  
 115.17 —  
 114.05 —  
 113.57 —  
 86.36 —  
 86.33 —  
 79.67 —  
 77.32 —  
 77.00 —  
 76.68 —  
 66.80 —  
 55.17 —  
 42.92 —  
 21.41 —

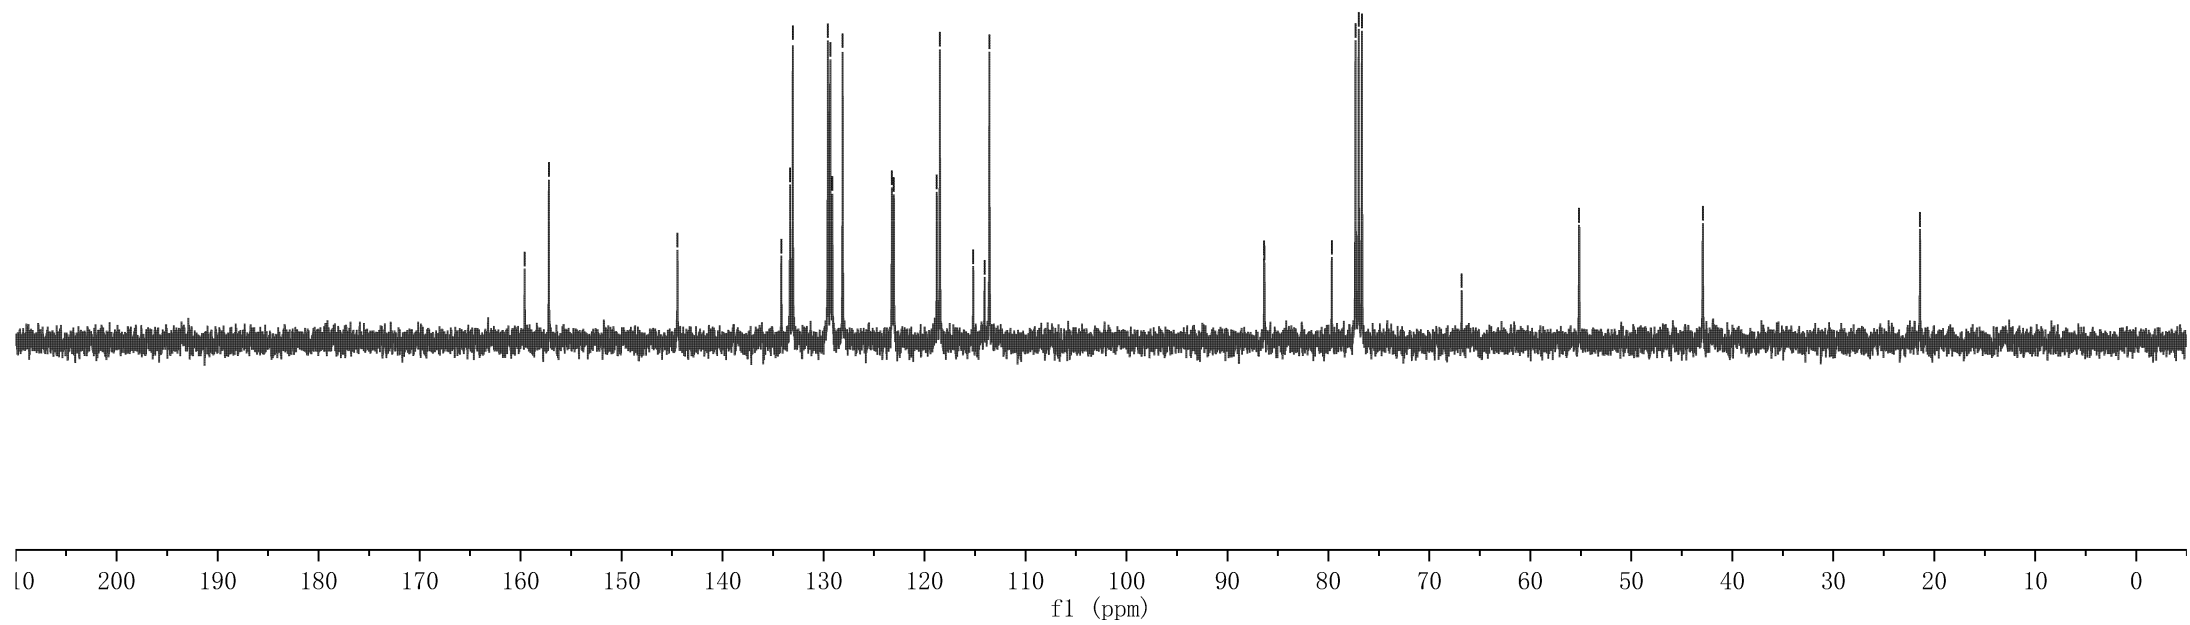

| Parameter                | Value                 |
|--------------------------|-----------------------|
| 1 Title                  | zjj-13-229-Mbs-diwu-H |
| 2 Origin                 | Bruker BioSpin GmbH   |
| 3 Solvent                | CDCl3                 |
| 4 Temperature            | 298.0                 |
| 5 Number of Scans        | 9                     |
| 6 Acquisition Time       | 4.0894                |
| 7 Acquisition Date       | 2022-03-27T17:03:05   |
| 8 Spectrometer Frequency | 400.13                |
| 9 Spectral Width         | 8012.8                |

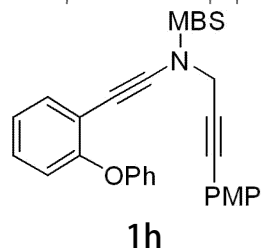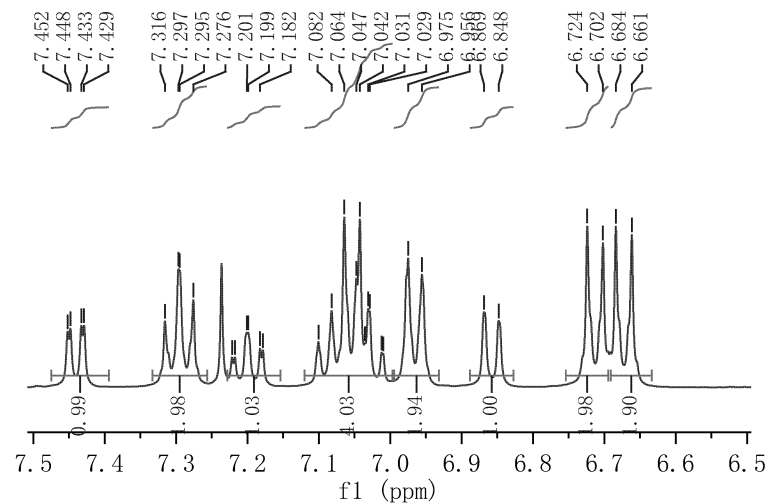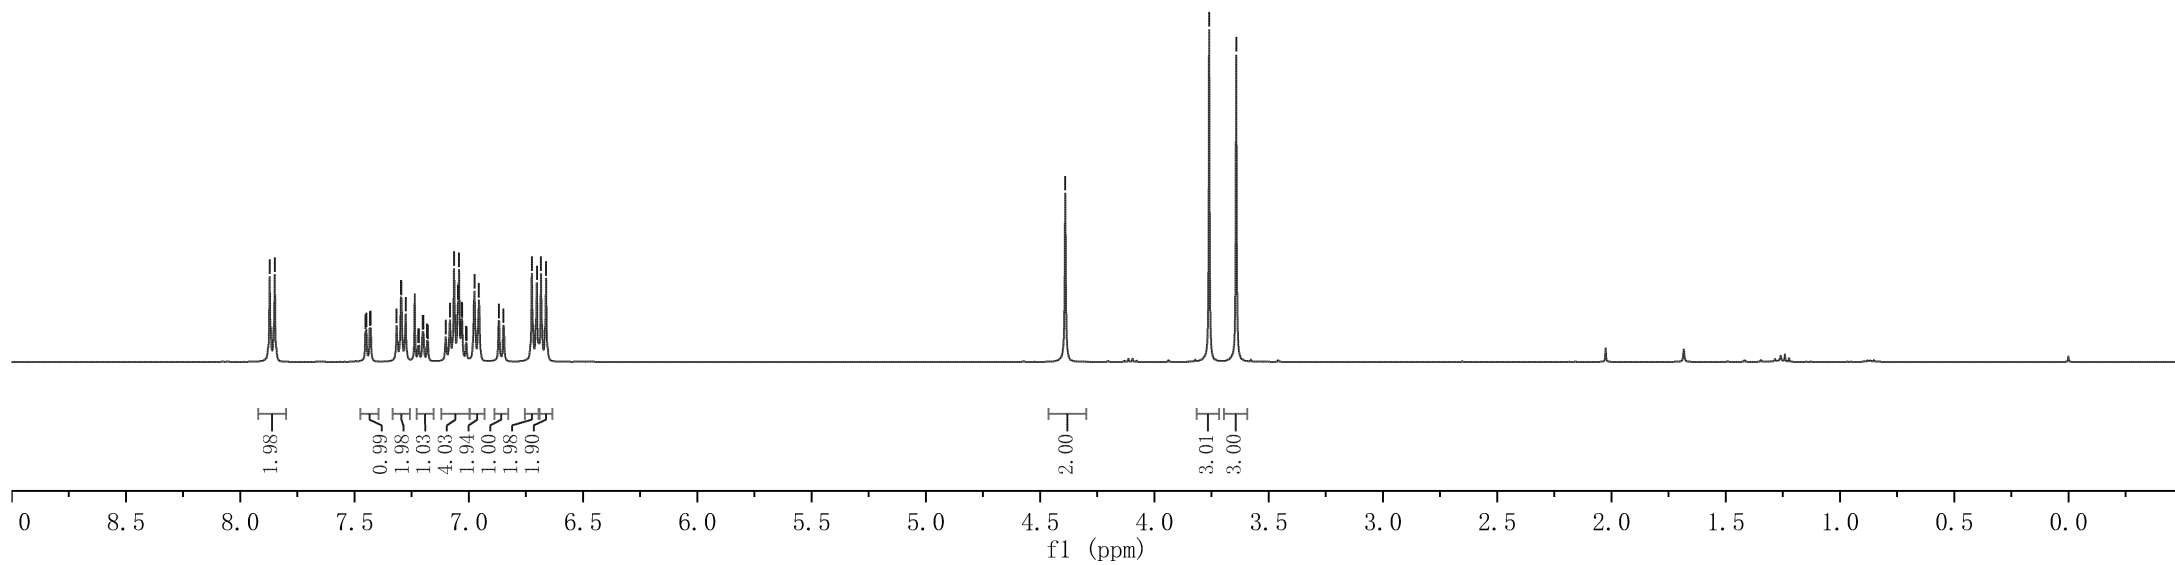

7.871  
7.849  
7.452  
7.448  
7.433  
7.429  
7.316  
7.297  
7.295  
7.276  
7.222  
7.217  
7.201  
7.199  
7.182  
7.178  
7.101  
7.082  
7.064  
7.047  
7.042  
7.035  
7.031  
7.029  
7.012  
7.010  
6.975  
6.956  
6.869  
6.848  
6.724  
6.684  
6.661

4.390

3.760  
3.642



163.52  
159.62  
157.23  
157.19

133.28  
133.06  
130.36  
129.62  
129.10  
128.65  
123.22  
123.09  
118.67  
118.58  
115.16  
114.08  
113.86  
113.58

86.53  
86.33  
79.78  
77.32  
77.00  
76.68

66.79

55.34  
55.17

42.86

| Parameter                | Value                 |
|--------------------------|-----------------------|
| 1 Title                  | zjj-13-229-Mbs-diwu-C |
| 2 Origin                 | Bruker BioSpin GmbH   |
| 3 Solvent                | CDC13                 |
| 4 Temperature            | 300.0                 |
| 5 Number of Scans        | 12                    |
| 6 Acquisition Time       | 1.3631                |
| 7 Acquisition Date       | 2022-03-27T17:04:40   |
| 8 Spectrometer Frequency | 100.61                |
| 9 Spectral Width         | 24038.5               |

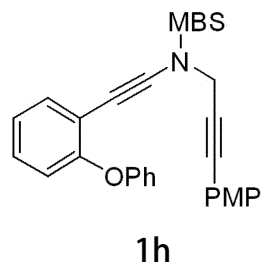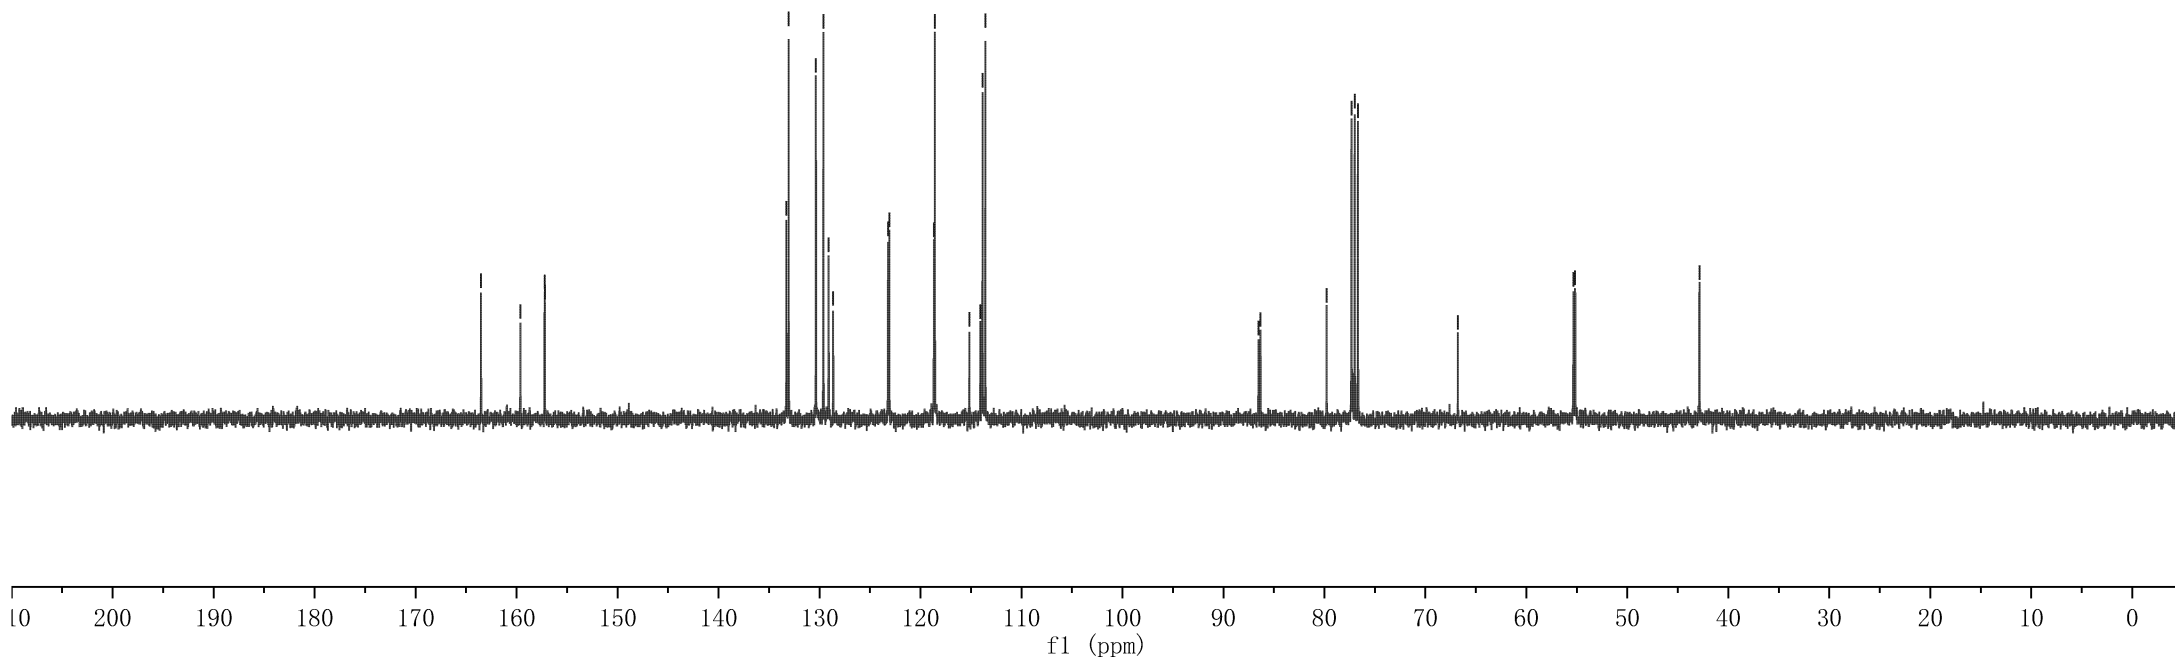

7.390  
7.370  
7.323  
7.301  
7.250  
7.231  
7.228  
7.215  
7.210  
7.016  
6.997  
6.979  
6.915  
6.913  
6.908  
6.893  
6.891  
6.802  
6.780

| Parameter                | Value               |
|--------------------------|---------------------|
| 1 Title                  | zjj-13-217-5-Me-H   |
| 2 Origin                 | Bruker BioSpin GmbH |
| 3 Solvent                | CDC13               |
| 4 Temperature            | 298.0               |
| 5 Number of Scans        | 5                   |
| 6 Acquisition Time       | 4.0894              |
| 7 Acquisition Date       | 2022-03-04T17:02:32 |
| 8 Spectrometer Frequency | 400.13              |
| 9 Spectral Width         | 8012.8              |

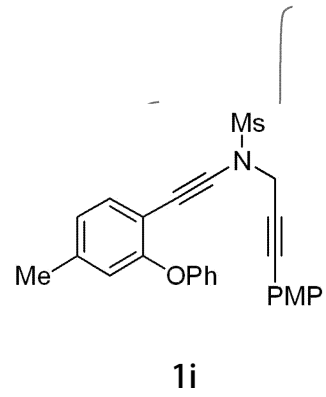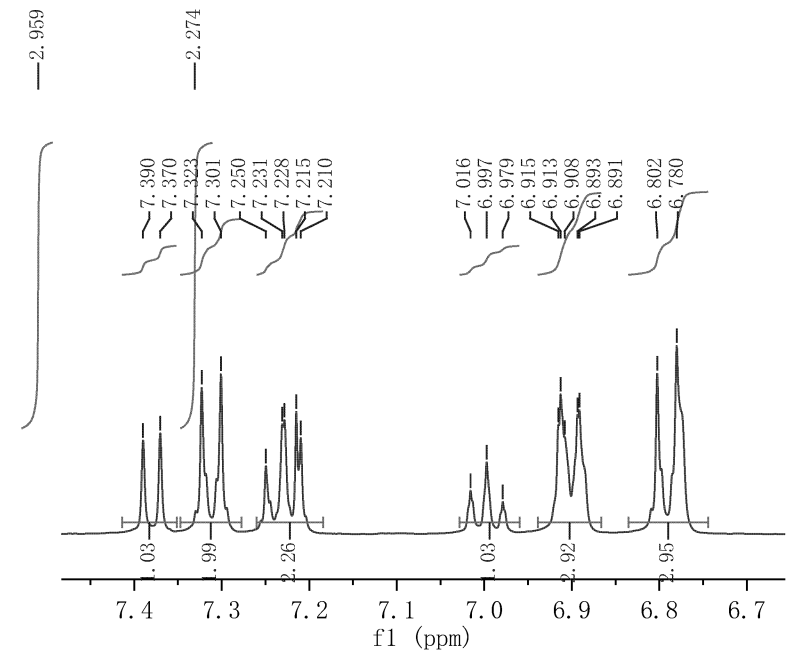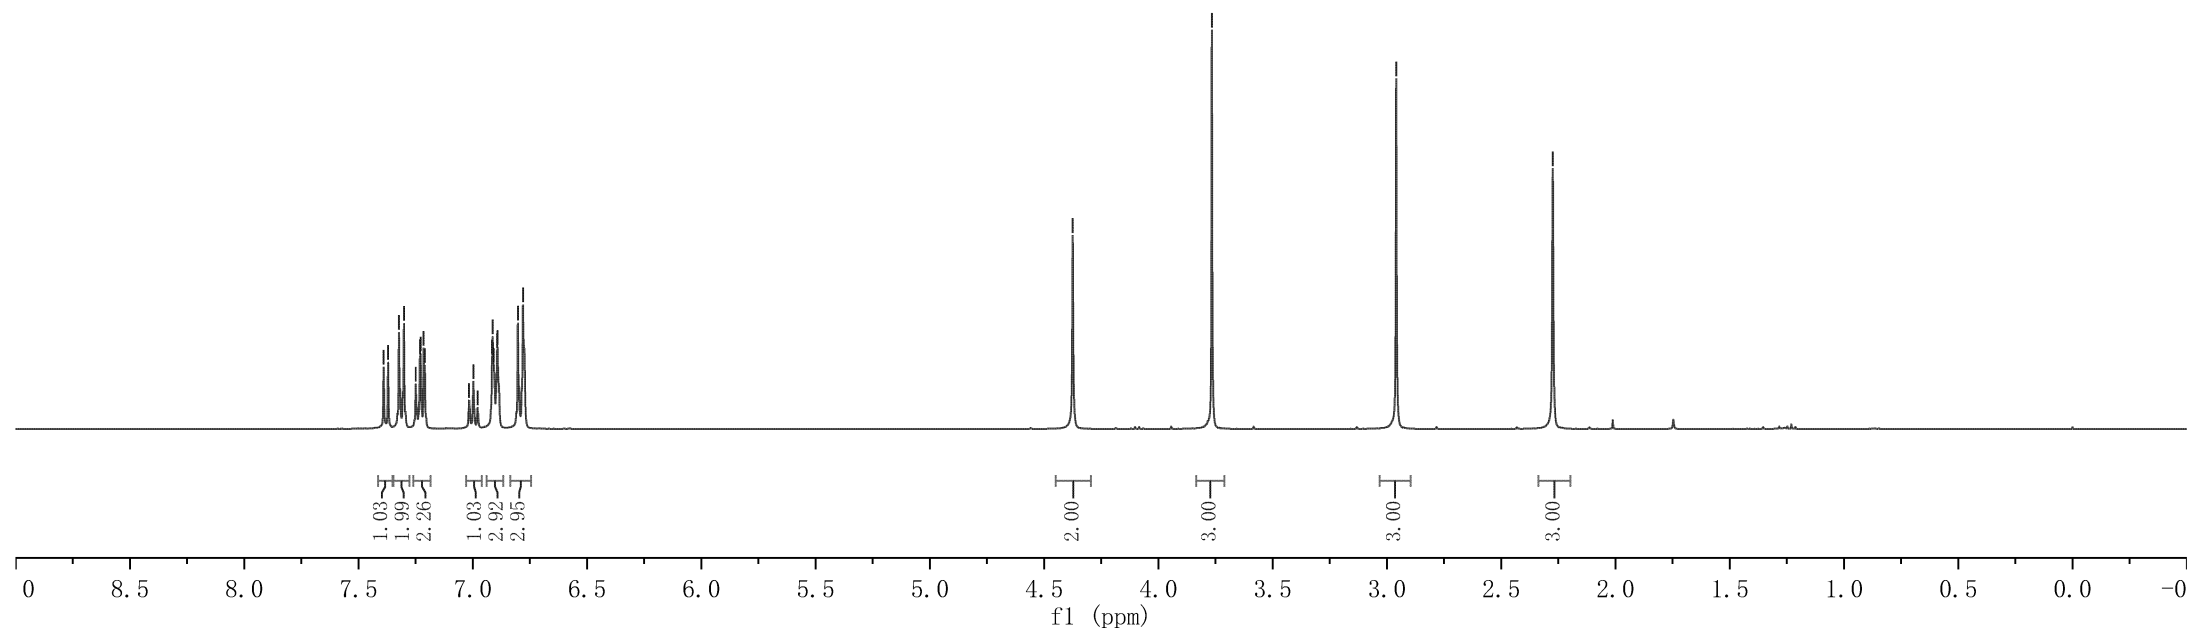

159.89  
157.40  
156.70

140.48

133.39  
133.16  
129.46

124.66  
122.48  
120.44  
117.42  
113.84  
113.63  
112.10

86.69  
85.24  
80.09  
77.32  
77.00  
76.68

66.78

55.10

42.85  
37.98

21.28

| Parameter                | Value               |
|--------------------------|---------------------|
| 1 Title                  | zjj-13-217-5-Me-C   |
| 2 Origin                 | Bruker BioSpin GmbH |
| 3 Solvent                | CDC13               |
| 4 Temperature            | 300.0               |
| 5 Number of Scans        | 29                  |
| 6 Acquisition Time       | 1.3631              |
| 7 Acquisition Date       | 2022-03-04T17:03:35 |
| 8 Spectrometer Frequency | 100.61              |
| 9 Spectral Width         | 24038.5             |

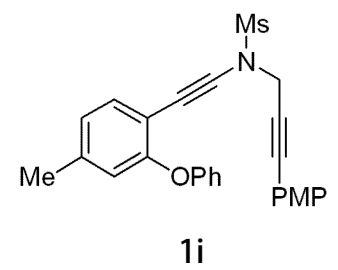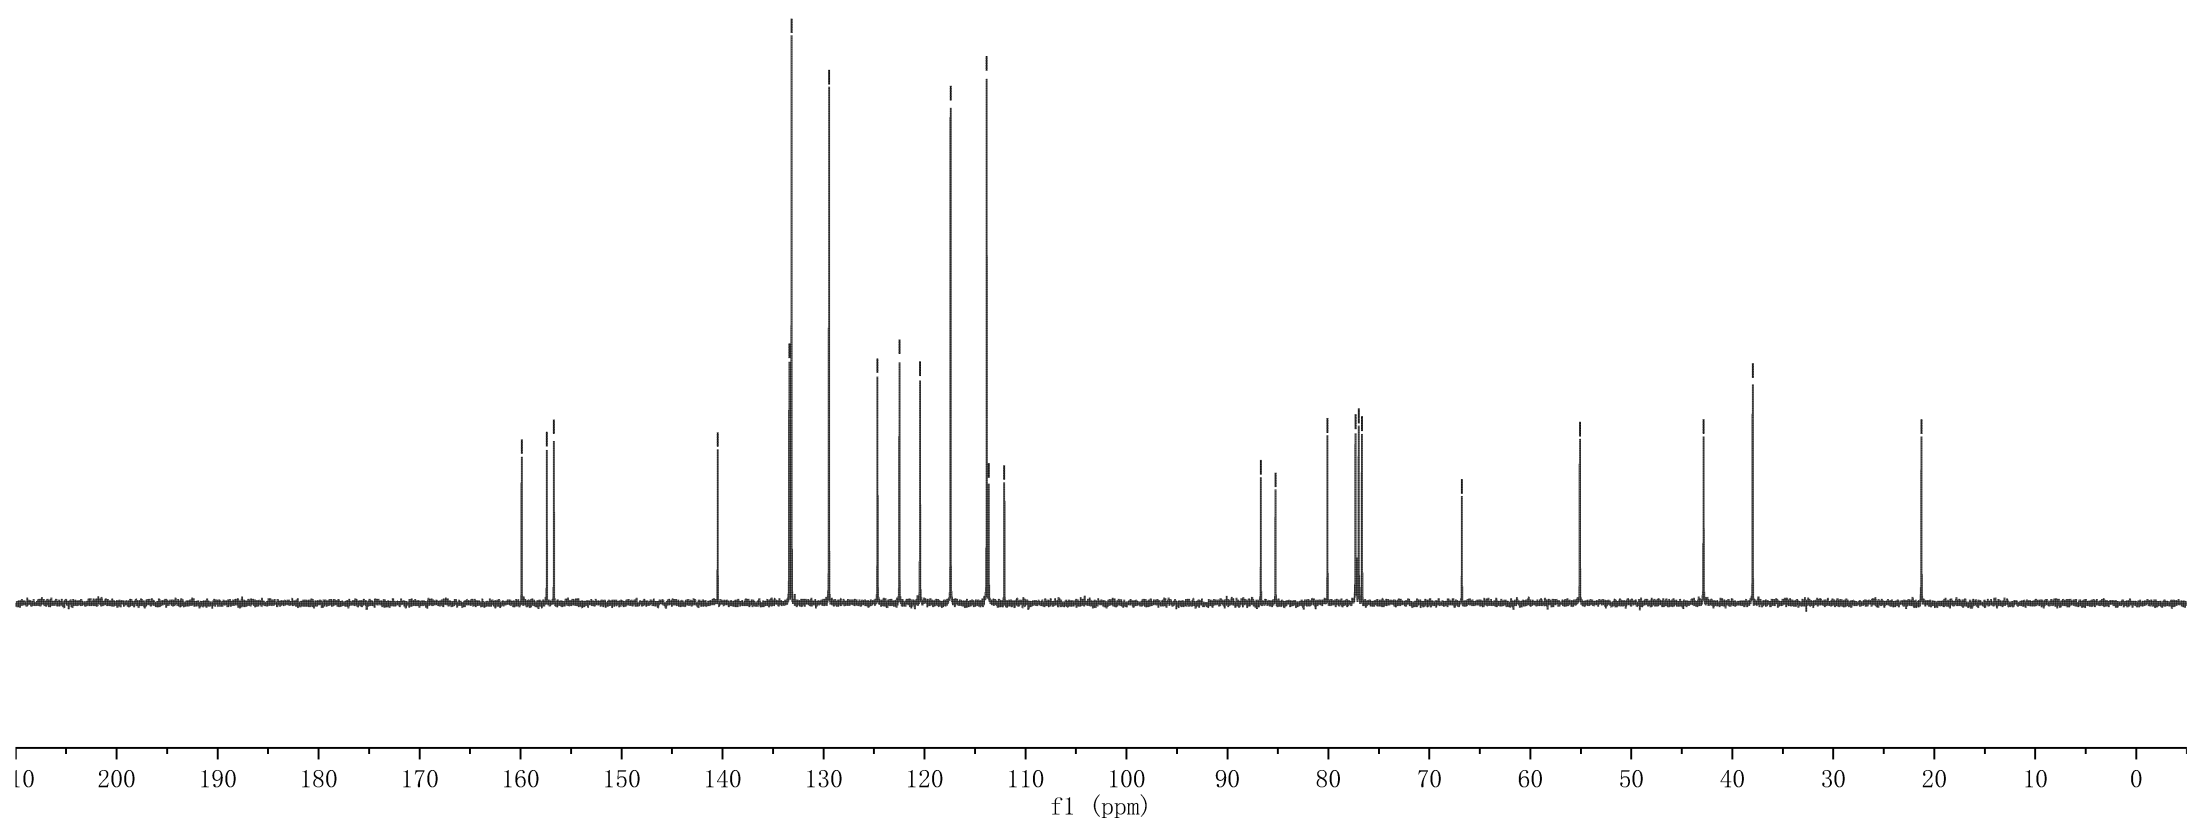

| Parameter                | Value                  |
|--------------------------|------------------------|
| 1 Title                  | zjj-13-217-5-Me-C-dept |
| 2 Origin                 | Bruker BioSpin GmbH    |
| 3 Solvent                | CDC13                  |
| 4 Temperature            | 300.0                  |
| 5 Number of Scans        | 5                      |
| 6 Acquisition Time       | 1.3631                 |
| 7 Acquisition Date       | 2022-03-04T17:05:49    |
| 8 Spectrometer Frequency | 100.61                 |
| 9 Spectral Width         | 24038.5                |

133.66  
 133.44  
 129.73  
 124.93  
 122.76  
 120.71  
 117.69  
 114.12

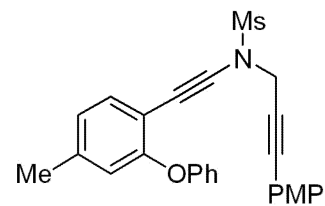

**1i**

—55.37  
 —43.12  
 —38.26  
 —21.55

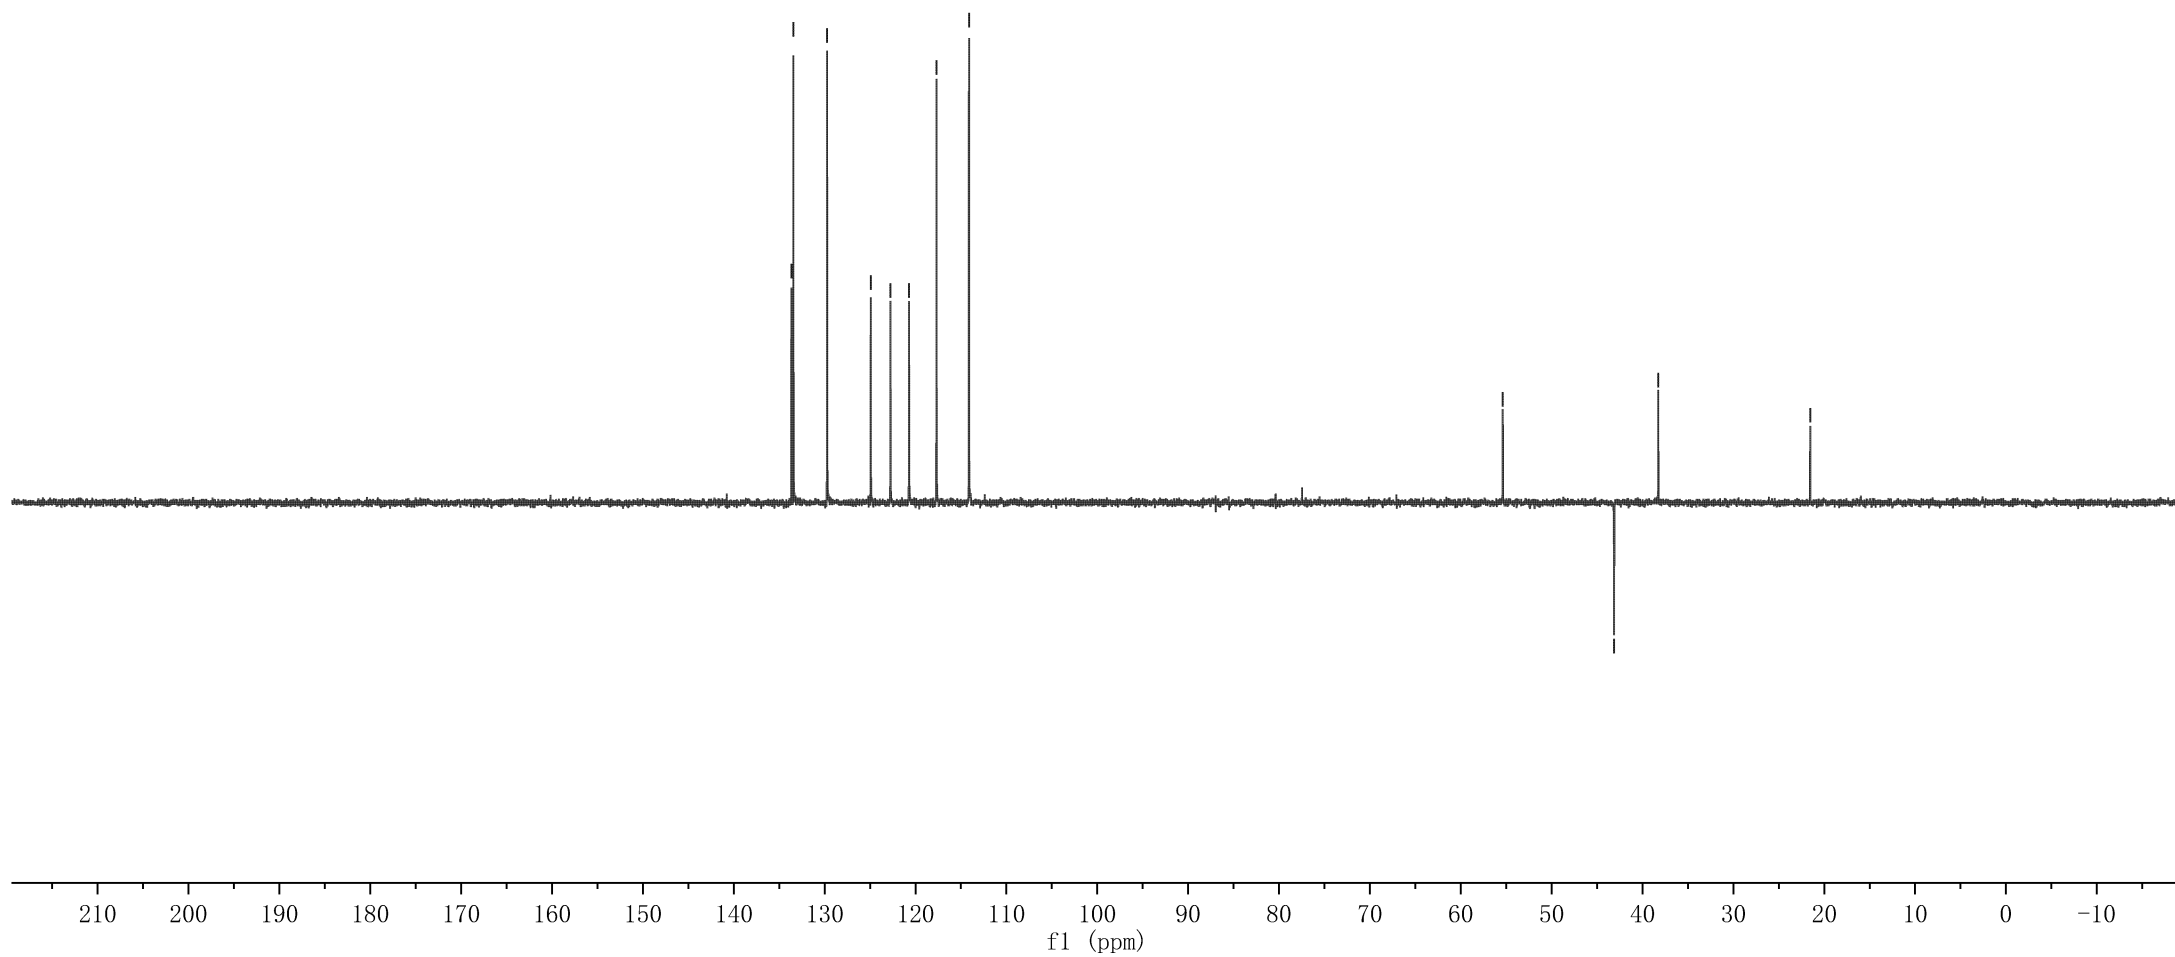

7.433  
7.412  
7.325  
7.304  
7.253  
7.233  
7.214  
7.028  
7.009  
6.991  
6.926  
6.906  
6.799  
6.778  
6.653  
6.648  
6.632  
6.626  
6.501  
6.495

| Parameter                | Value               |
|--------------------------|---------------------|
| 1 Title                  | ZJJ-13-222-5-OMe-H  |
| 2 Origin                 | Bruker BioSpin GmbH |
| 3 Solvent                | CDCl <sub>3</sub>   |
| 4 Temperature            | 298.0               |
| 5 Number of Scans        | 16                  |
| 6 Acquisition Time       | 4.0894              |
| 7 Acquisition Date       | 2022-03-15T14:12:30 |
| 8 Spectrometer Frequency | 400.13              |
| 9 Spectral Width         | 8012.8              |

4.386  
3.766  
3.706  
2.954

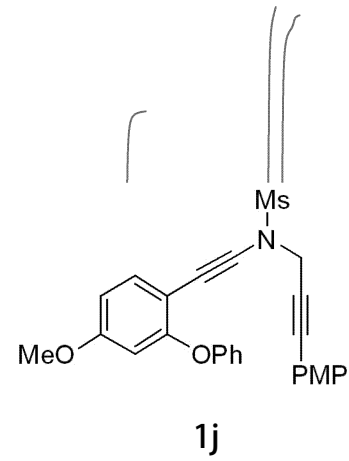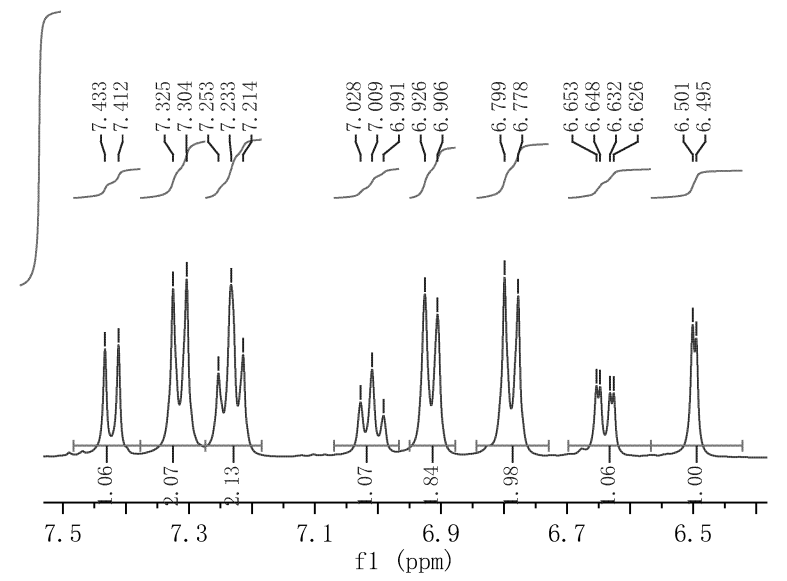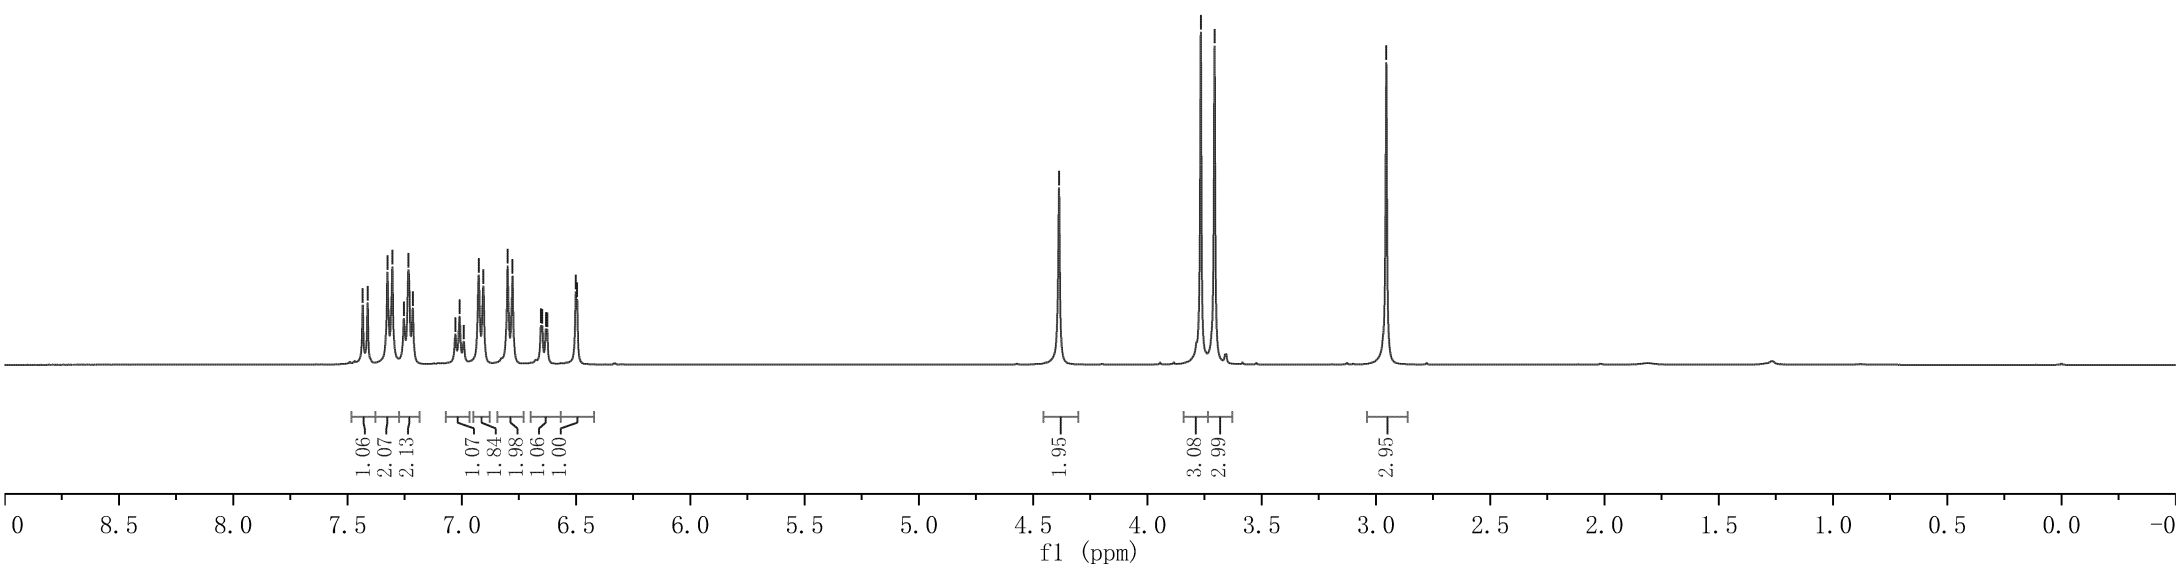



| Parameter                | Value               |
|--------------------------|---------------------|
| 1 Title                  | LFS-2-140-H         |
| 2 Origin                 |                     |
| 3 Solvent                | CDC13               |
| 4 Temperature            | 297.8               |
| 5 Number of Scans        | 16                  |
| 6 Acquisition Time       | 4.0002              |
| 7 Acquisition Date       | 2022-04-05T18:35:49 |
| 8 Spectrometer Frequency | 399.93              |
| 9 Spectral Width         | 8012.0              |

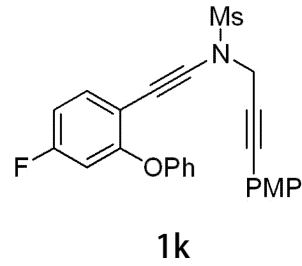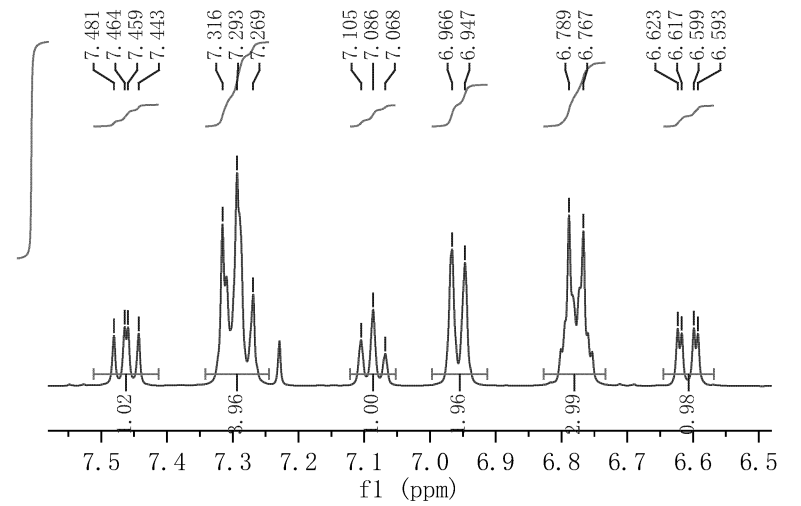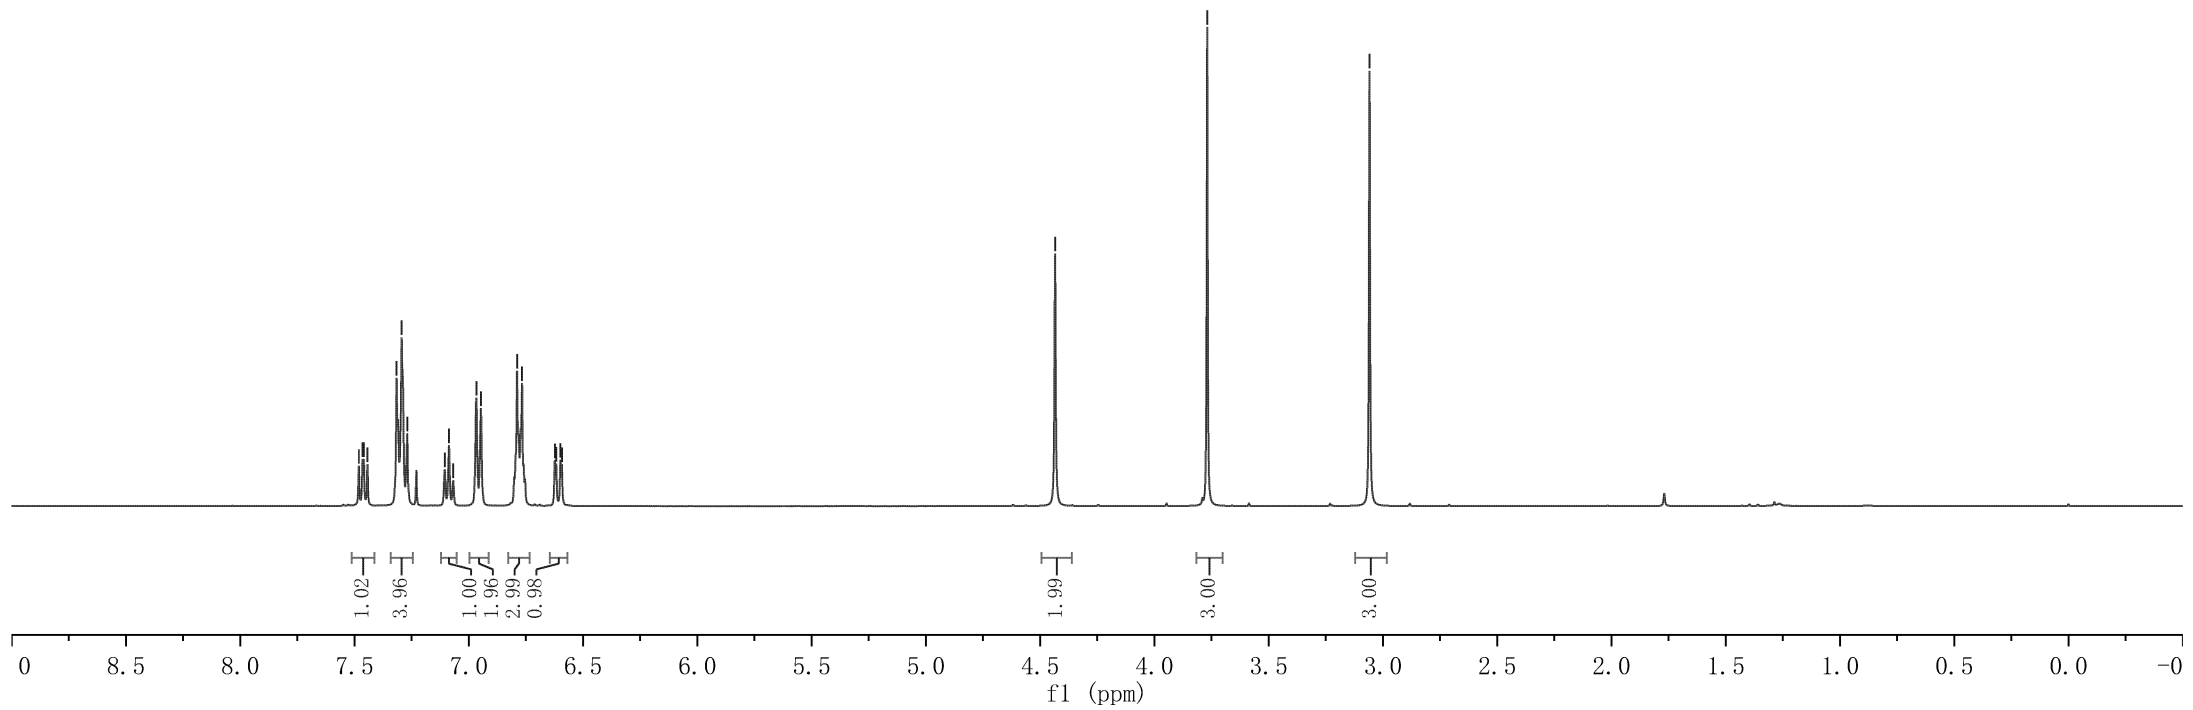

7.481  
7.464  
7.459  
7.443  
7.316  
7.293  
7.269  
7.105  
7.086  
7.068  
6.966  
6.947  
6.789  
6.767  
6.623  
6.617  
6.599  
6.593

4.434

3.769

3.058





| Parameter                | Value               |
|--------------------------|---------------------|
| 1 Title                  | zjj-14-5-F-sub-F    |
| 2 Origin                 | Bruker BioSpin GmbH |
| 3 Solvent                | CDC13               |
| 4 Temperature            | 295.5               |
| 5 Number of Scans        | 13                  |
| 6 Acquisition Time       | 0.7340              |
| 7 Acquisition Date       | 2022-04-07T10:26:11 |
| 8 Spectrometer Frequency | 376.31              |
| 9 Spectral Width         | 89285.7             |

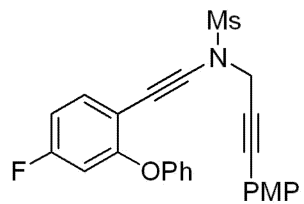

1k

-107.58

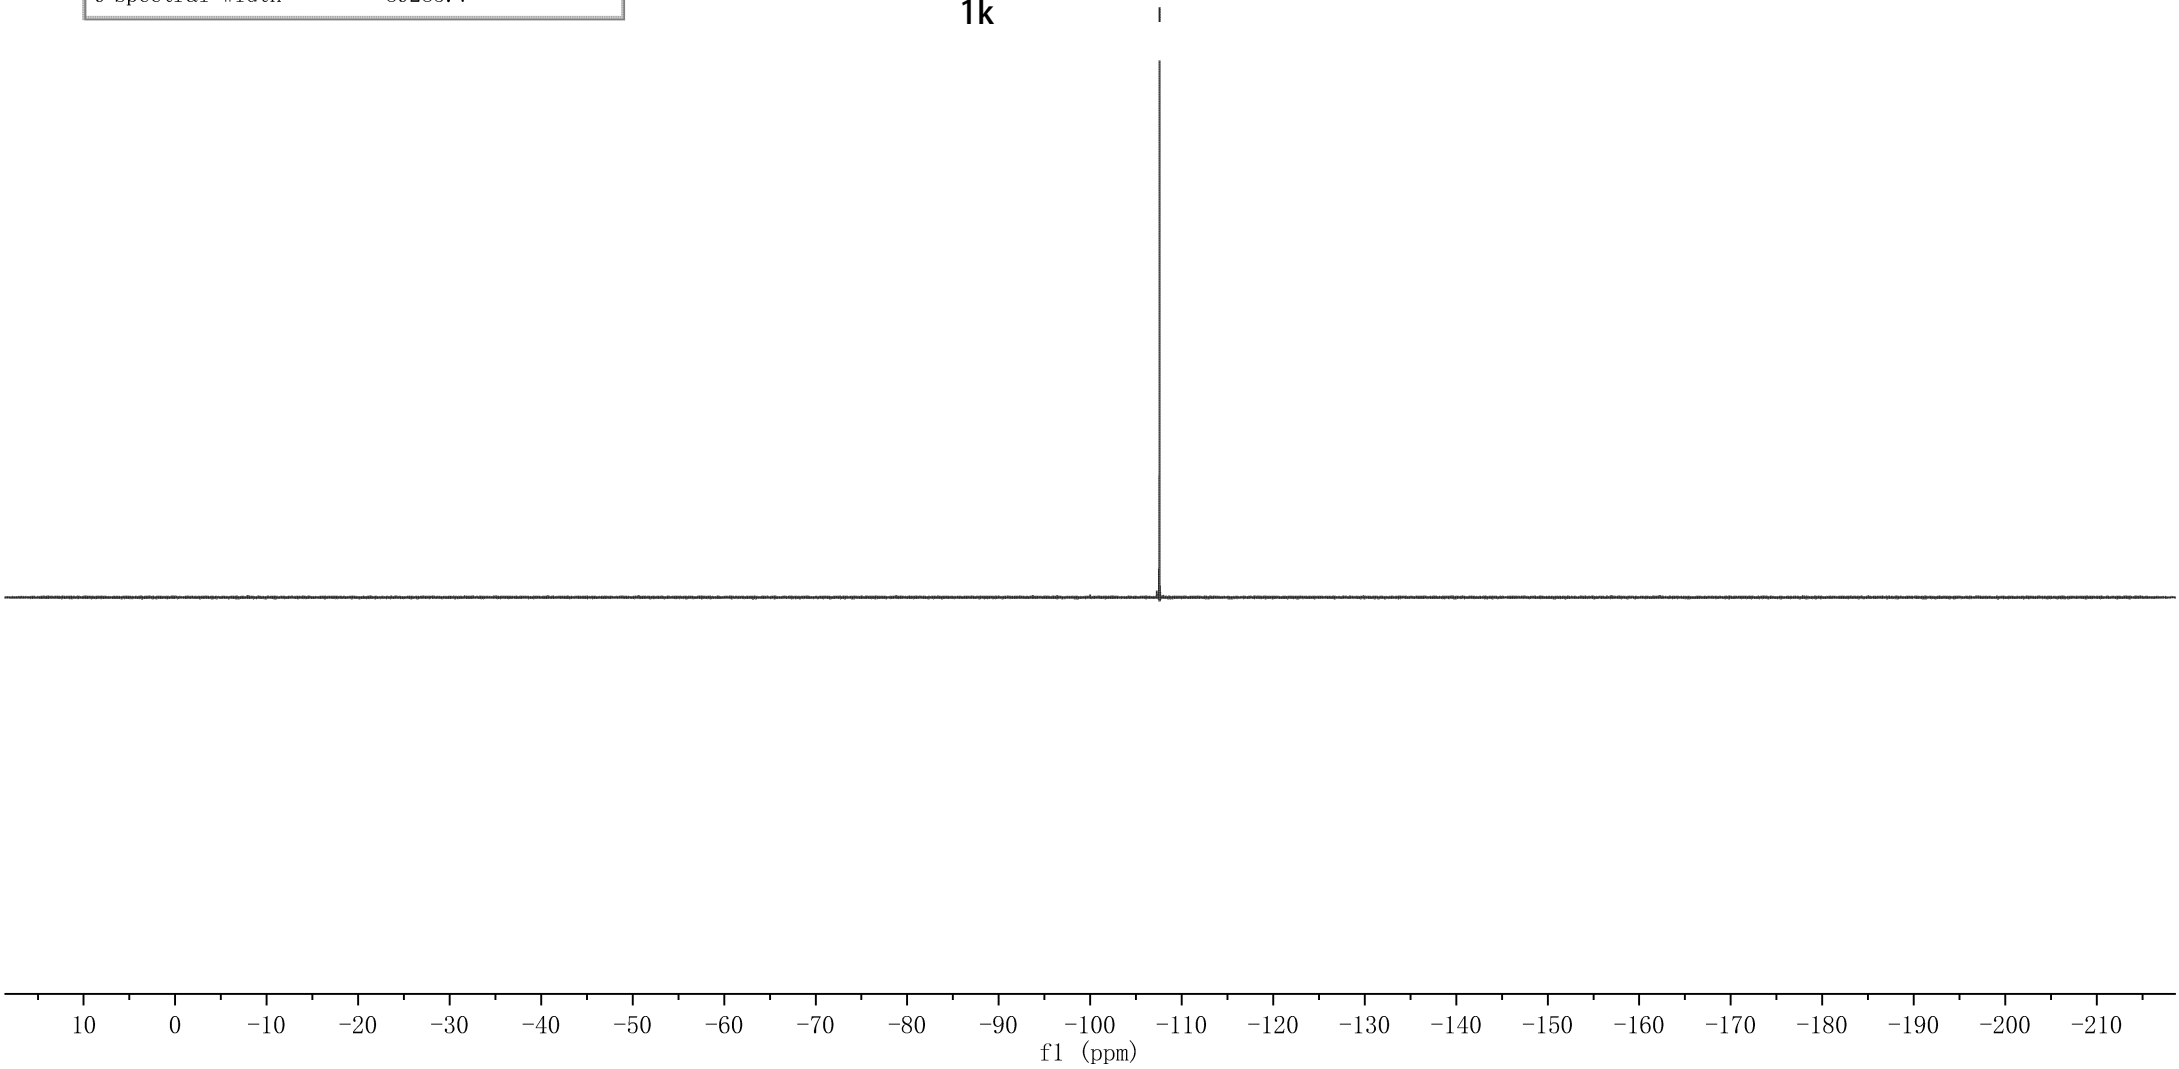

7.422  
7.402  
7.319  
7.297  
7.276  
7.243  
7.107  
7.088  
7.070  
7.066  
7.050  
7.045  
6.962  
6.942  
6.907  
6.903  
6.804  
6.783

4.431

3.795

3.053

| Parameter                | Value                 |
|--------------------------|-----------------------|
| 1 Title                  | zjj-14-22-5-Cl-diwu-H |
| 2 Origin                 | Brüker BioSpin GmbH   |
| 3 Solvent                | CDC13                 |
| 4 Temperature            | 298.0                 |
| 5 Number of Scans        | 5                     |
| 6 Acquisition Time       | 4.0894                |
| 7 Acquisition Date       | 2022-04-08T14:49:45   |
| 8 Spectrometer Frequency | 400.13                |
| 9 Spectral Width         | 8012.8                |

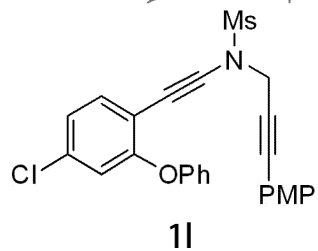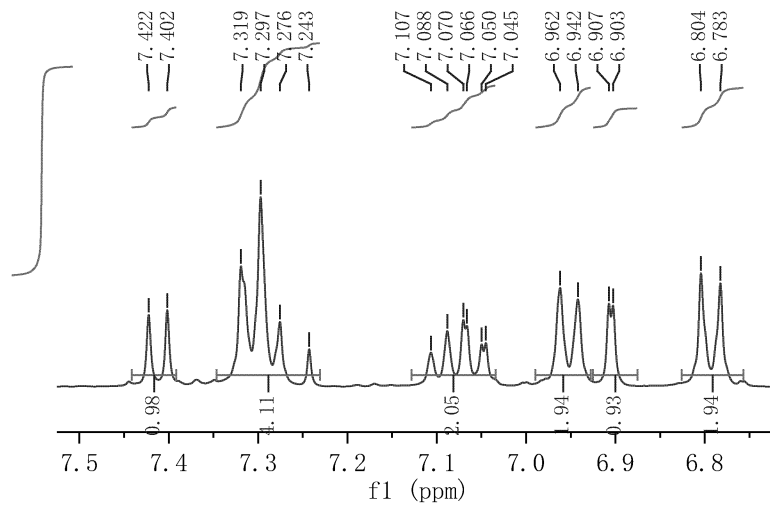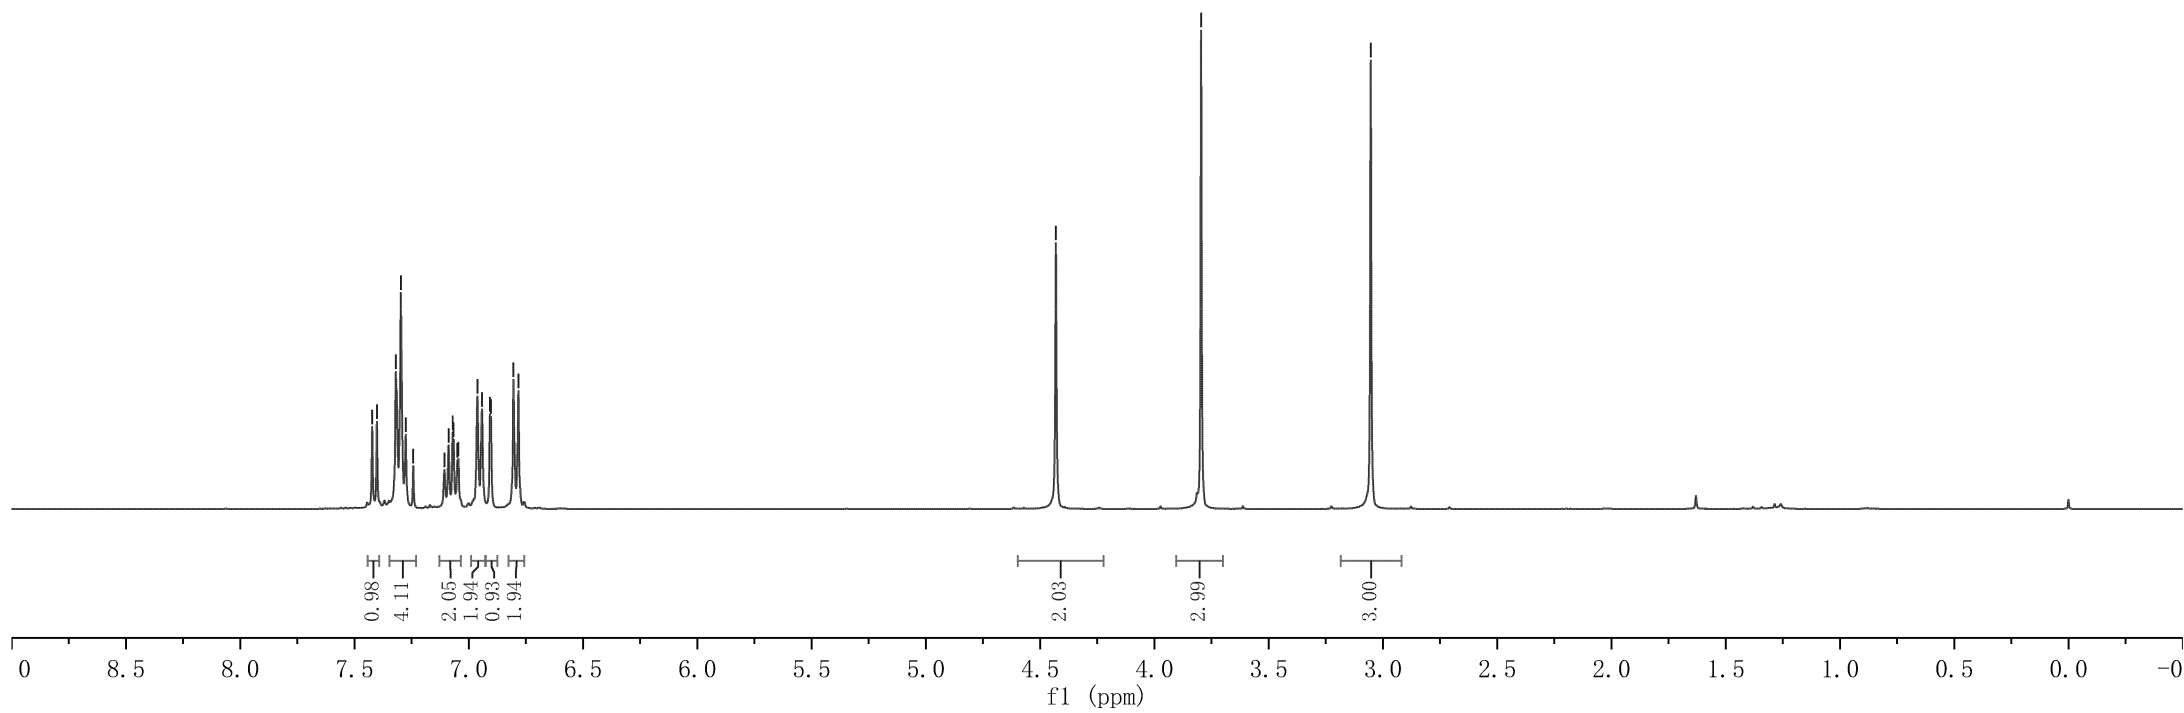

| Parameter                | Value                 |
|--------------------------|-----------------------|
| 1 Title                  | zjj-14-22-5-Cl-diwu-C |
| 2 Origin                 | Bruker BioSpin GmbH   |
| 3 Solvent                | CDC13                 |
| 4 Temperature            | 300.0                 |
| 5 Number of Scans        | 32                    |
| 6 Acquisition Time       | 1.3631                |
| 7 Acquisition Date       | 2022-04-08T14:50:54   |
| 8 Spectrometer Frequency | 100.61                |
| 9 Spectral Width         | 24038.5               |

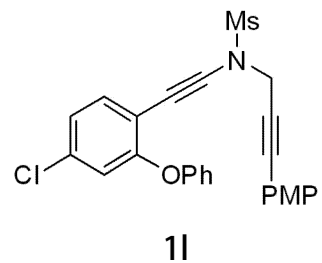

160.03  
157.88  
156.43

134.85  
134.20  
133.27  
129.82  
123.75  
123.60  
119.32  
118.33  
113.95  
113.64  
113.44

86.96  
86.73  
79.98  
77.32  
77.00  
76.68

66.17

55.23

42.97  
38.41

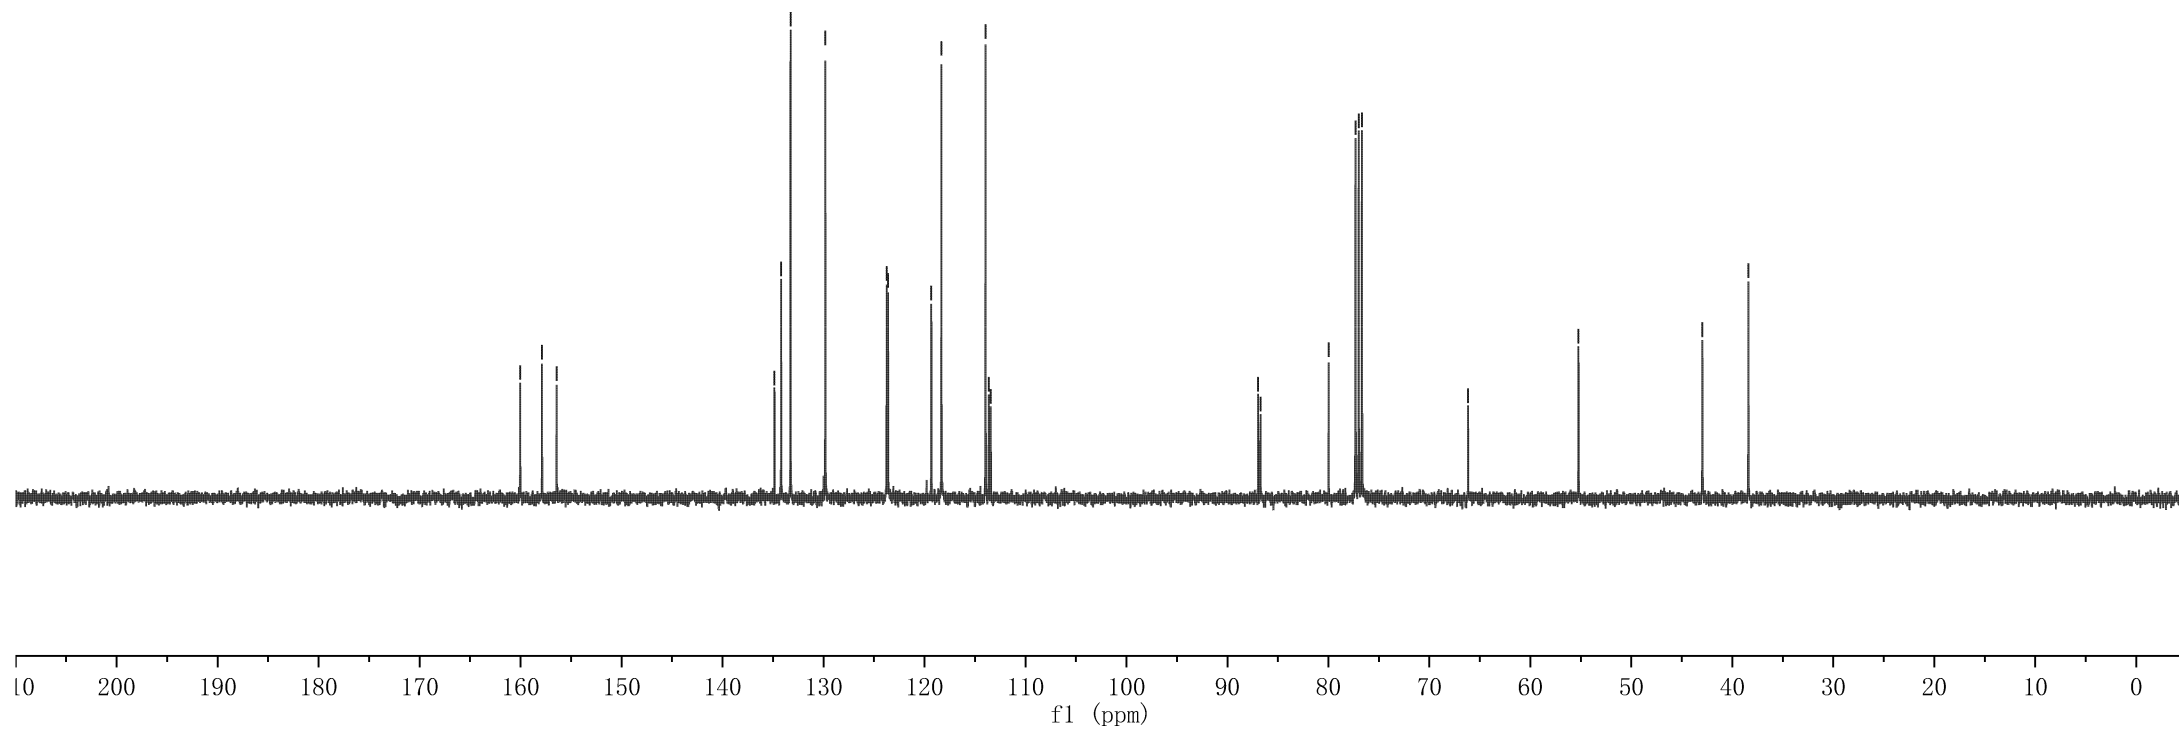

7.354  
7.333  
7.317  
7.312  
7.295  
7.272  
7.242  
7.221  
7.216  
7.200  
7.195  
7.102  
7.084  
7.064  
7.059  
6.957  
6.937  
6.804  
6.782

4.426

3.794

3.049

| Parameter                | Value                  |
|--------------------------|------------------------|
| 1 Title                  | ZJJ-13-157-5-Br-diwu-H |
| 2 Origin                 | Bruker BioSpin GmbH    |
| 3 Solvent                | CDCl3                  |
| 4 Temperature            | 298.0                  |
| 5 Number of Scans        | 9                      |
| 6 Acquisition Time       | 4.0894                 |
| 7 Acquisition Date       | 2022-01-21T17:39:51    |
| 8 Spectrometer Frequency | 400.13                 |
| 9 Spectral Width         | 8012.8                 |

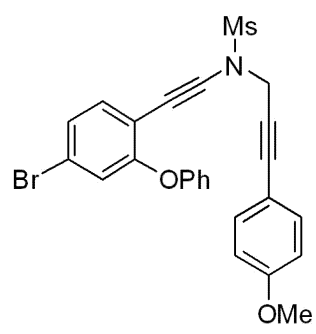

1m

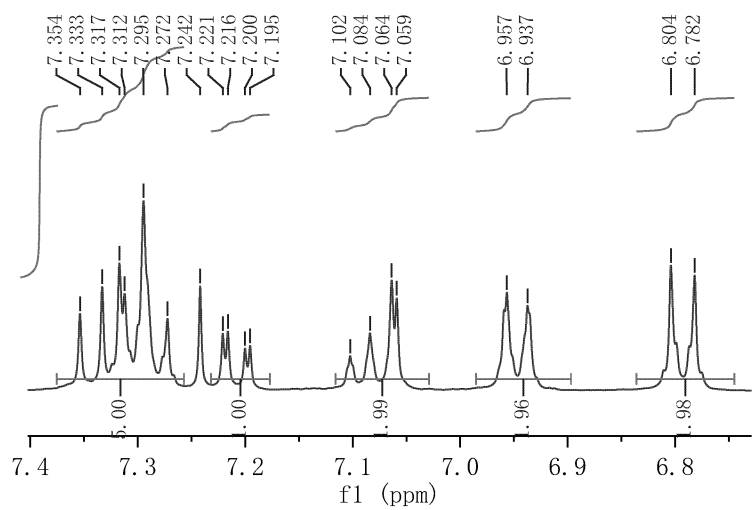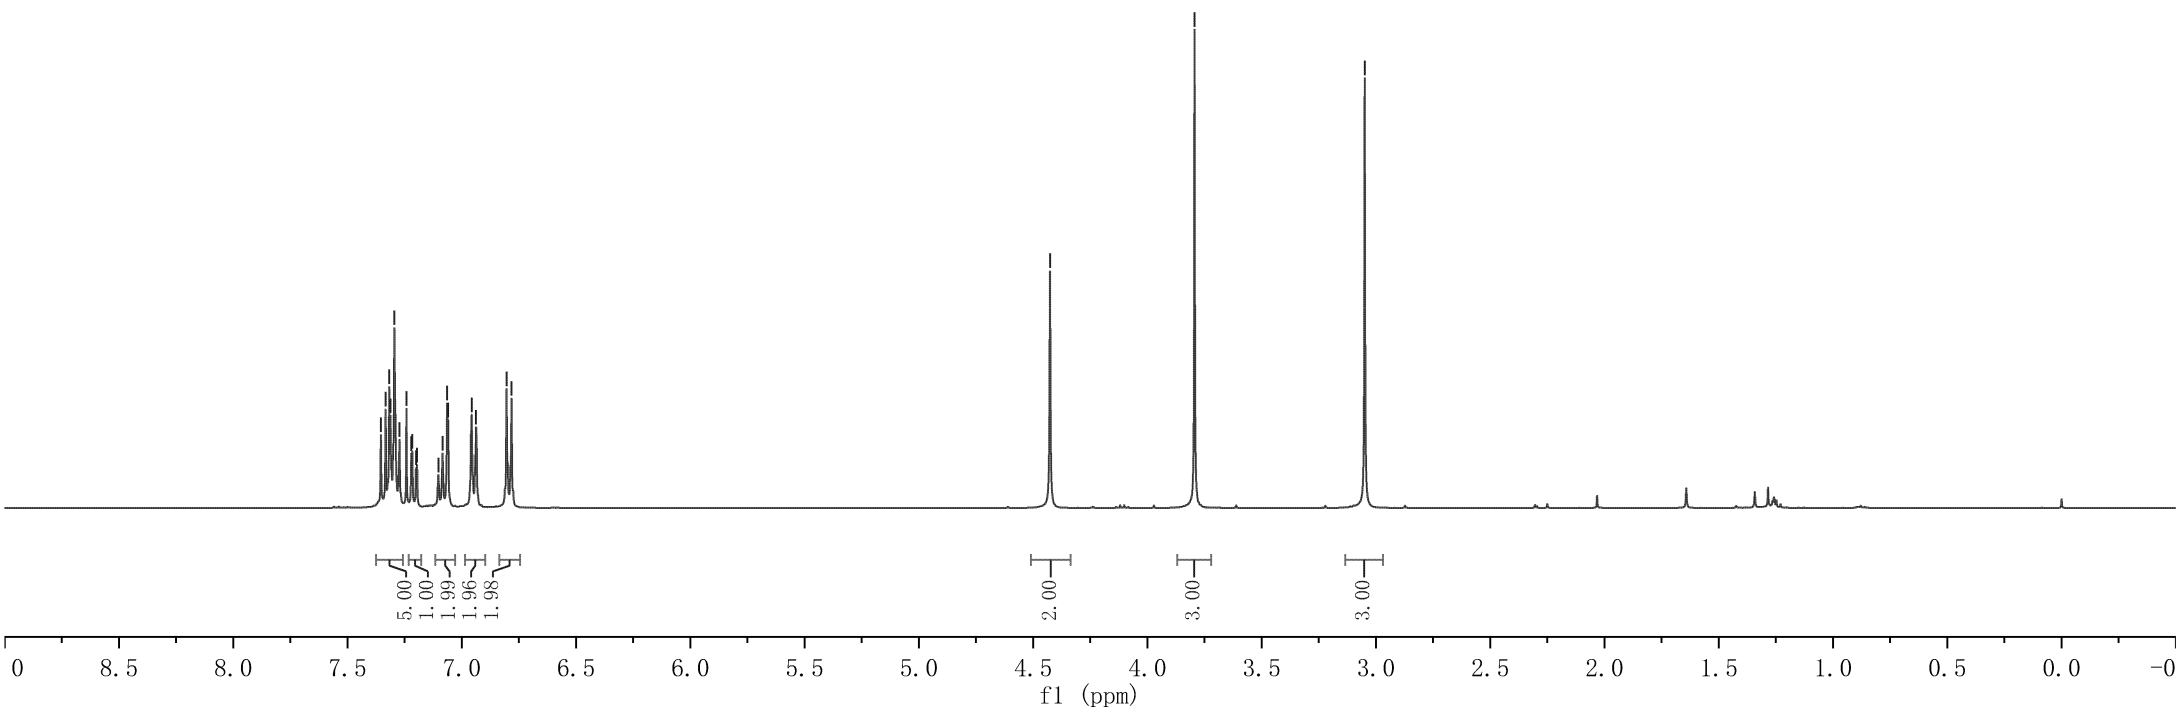

| Parameter                | Value                  |
|--------------------------|------------------------|
| 1 Title                  | ZJJ-13-157-5-Br-diwu-H |
| 2 Origin                 | Bruker BioSpin GmbH    |
| 3 Solvent                | CDC13                  |
| 4 Temperature            | 298.0                  |
| 5 Number of Scans        | 9                      |
| 6 Acquisition Time       | 4.0894                 |
| 7 Acquisition Date       | 2022-01-21T17:39:51    |
| 8 Spectrometer Frequency | 400.13                 |
| 9 Spectral Width         | 8012.8                 |

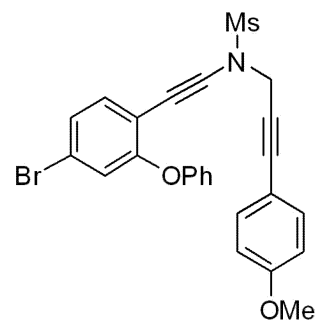

1m

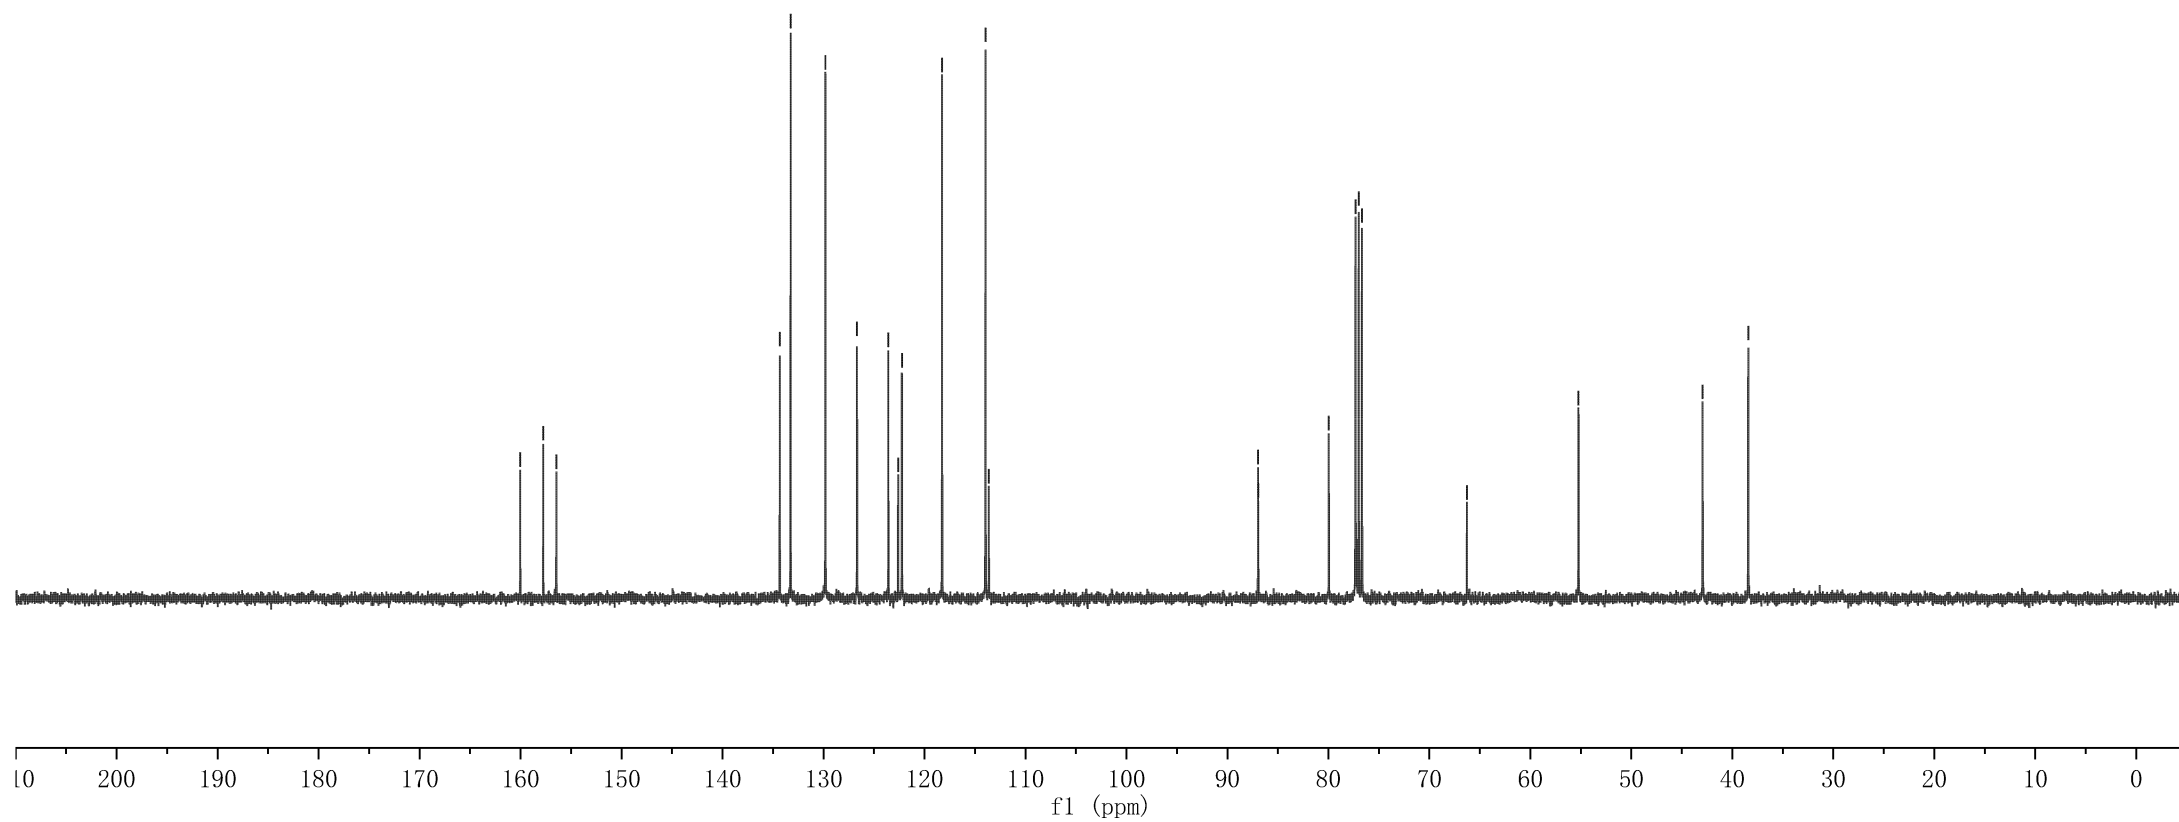



| Parameter                | Value                  |
|--------------------------|------------------------|
| 1 Title                  | zjj-13-191-4-Me-diwu-C |
| 2 Origin                 | Bruker BioSpin GmbH    |
| 3 Solvent                | CDC13                  |
| 4 Temperature            | 300.0                  |
| 5 Number of Scans        | 23                     |
| 6 Acquisition Time       | 1.3631                 |
| 7 Acquisition Date       | 2022-02-22T17:04:44    |
| 8 Spectrometer Frequency | 100.61                 |
| 9 Spectral Width         | 24038.5                |

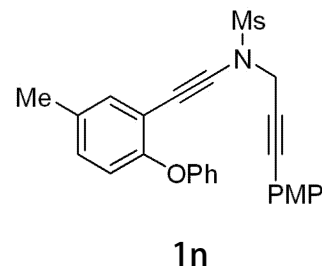

159.93  
157.78  
154.20

133.79  
133.56  
133.22  
130.37  
129.42  
122.24  
120.15  
117.00  
115.14  
113.87  
113.65

86.75  
85.70  
80.05  
77.32  
77.00  
76.68

66.97

55.14

42.86  
38.10

20.37

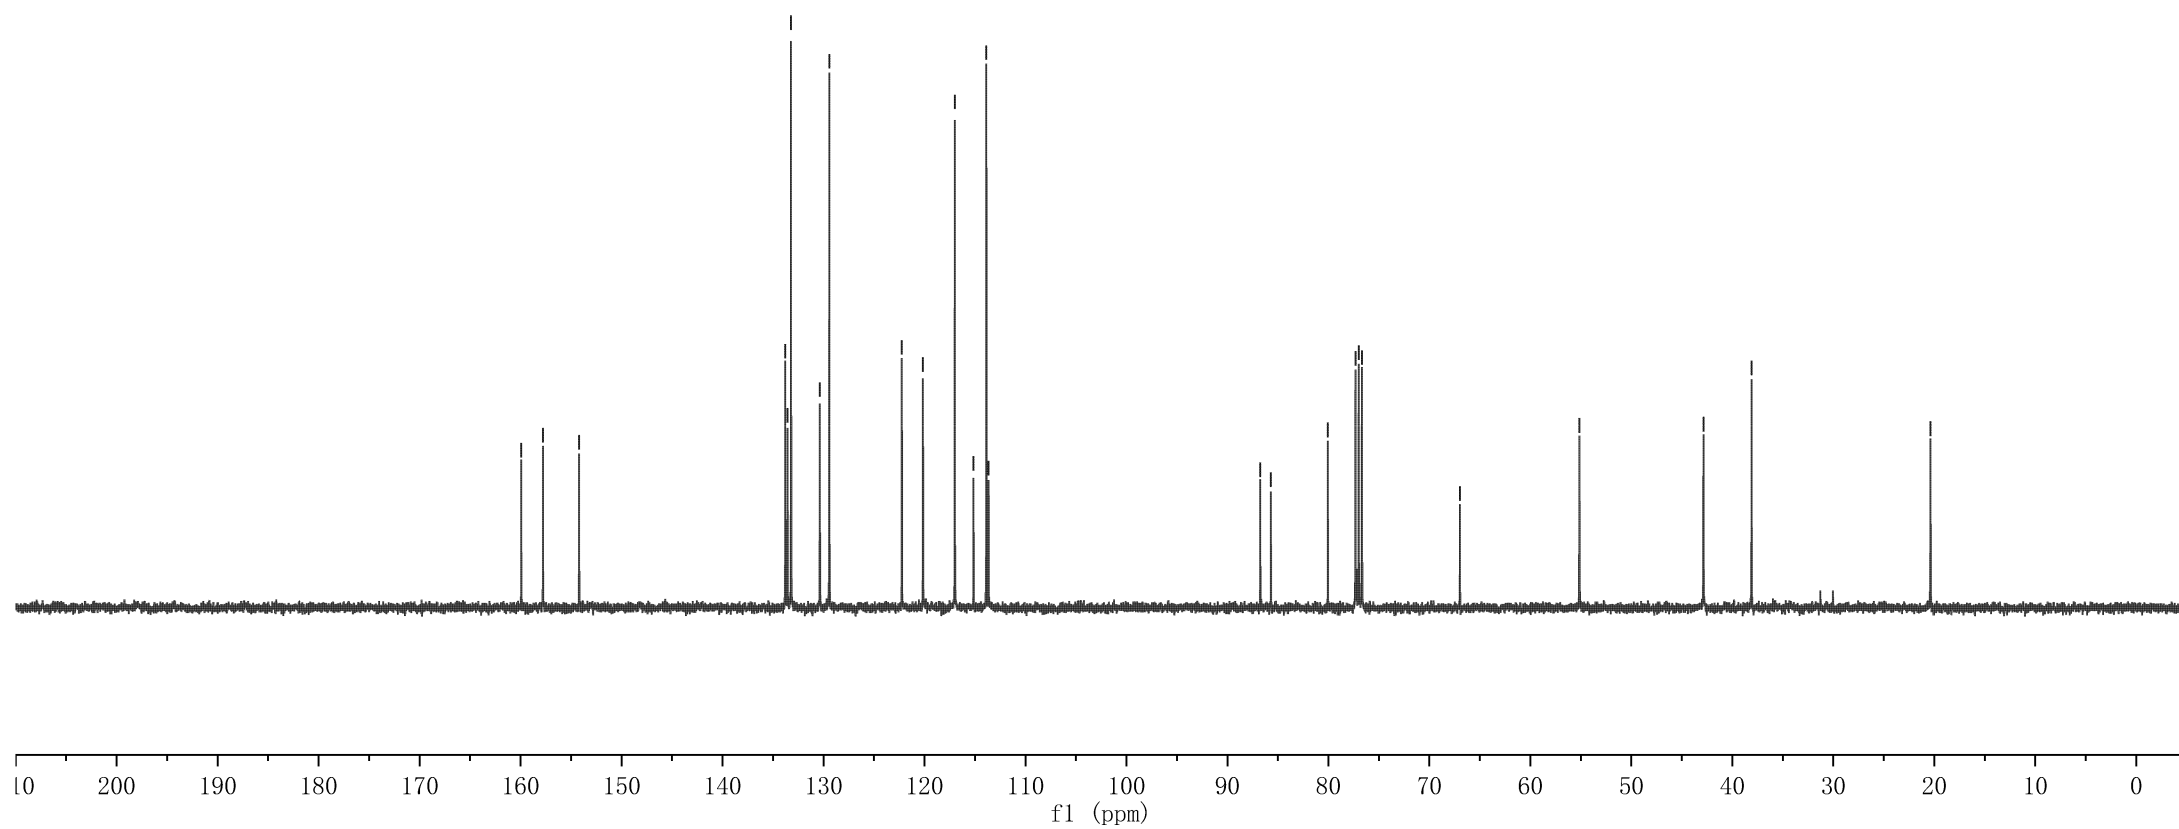

| Parameter                | Value                   |
|--------------------------|-------------------------|
| 1 Title                  | ZJJ-13-18000-4-F-DIWU-H |
| 2 Origin                 | Bruker BioSpin GmbH     |
| 3 Solvent                | CDCl3                   |
| 4 Temperature            | 295.3                   |
| 5 Number of Scans        | 12                      |
| 6 Acquisition Time       | 3.9846                  |
| 7 Acquisition Date       | 2022-01-19T17:40:21     |
| 8 Spectrometer Frequency | 399.93                  |
| 9 Spectral Width         | 8223.7                  |

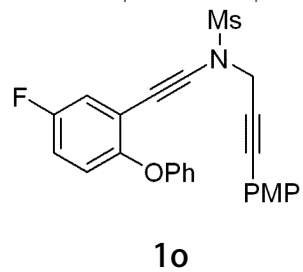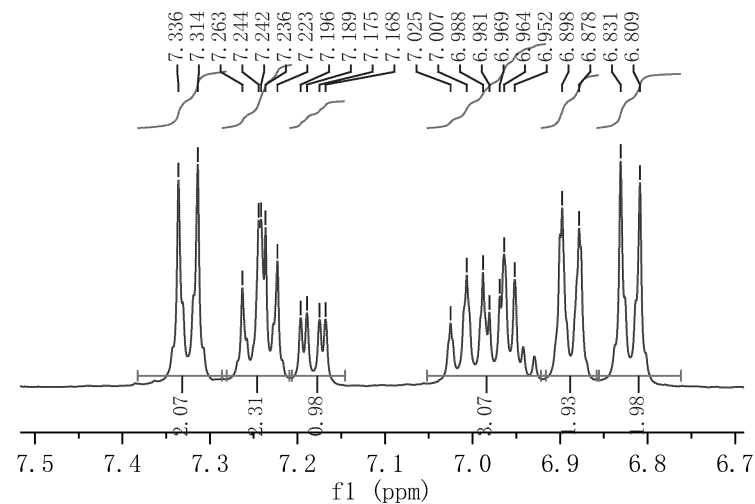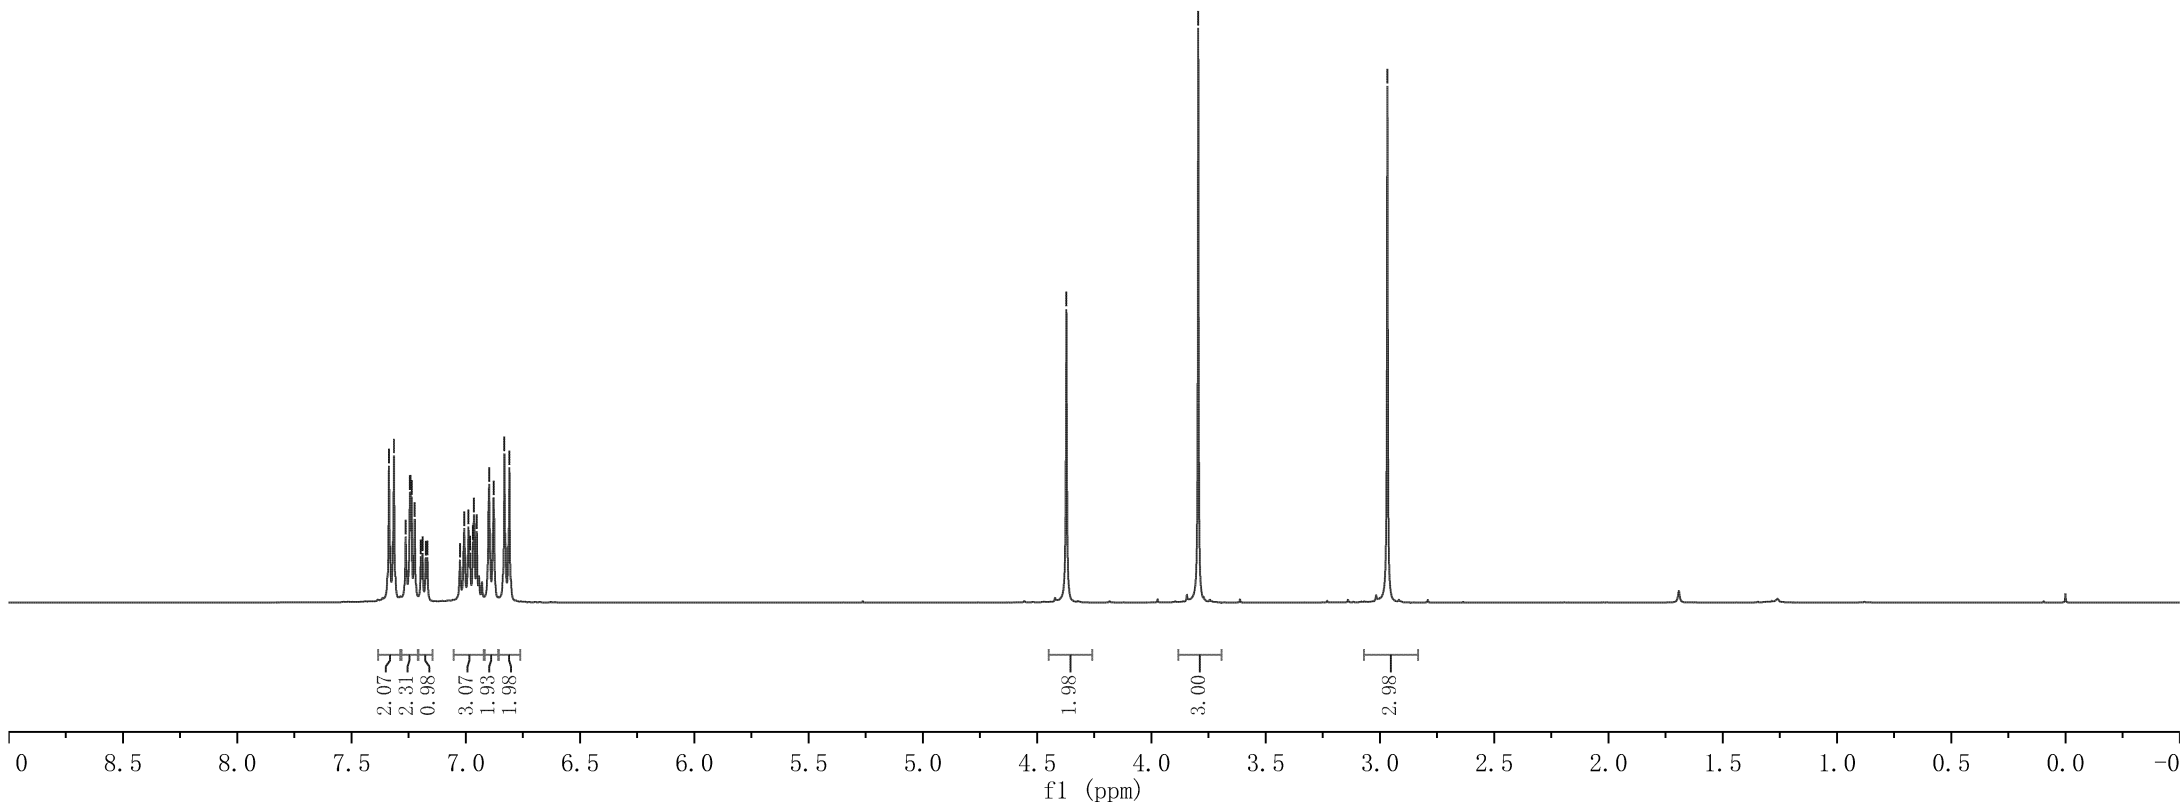



| Parameter                | Value               |
|--------------------------|---------------------|
| 1 Title                  | ZJJ-13-4-F-H        |
| 2 Origin                 | Bruker BioSpin GmbH |
| 3 Solvent                | CDC13               |
| 4 Temperature            | 295.3               |
| 5 Number of Scans        | 12                  |
| 6 Acquisition Time       | 3.9846              |
| 7 Acquisition Date       | 2022-01-19T17:40:21 |
| 8 Spectrometer Frequency | 399.93              |
| 9 Spectral Width         | 8223.7              |

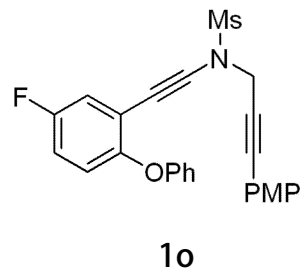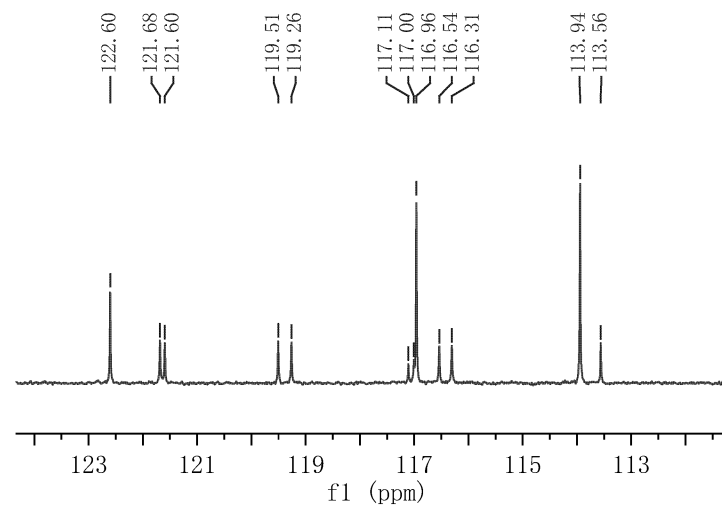

160.03  
159.63  
157.61  
152.48  
152.46

133.25  
129.58  
129.58  
121.68  
121.60  
119.51  
119.26  
117.11  
117.00  
116.96  
116.54  
116.31  
113.94  
113.56

87.04  
86.93

79.87  
77.32  
77.00  
76.68

66.21  
66.18

55.19

42.86  
38.40

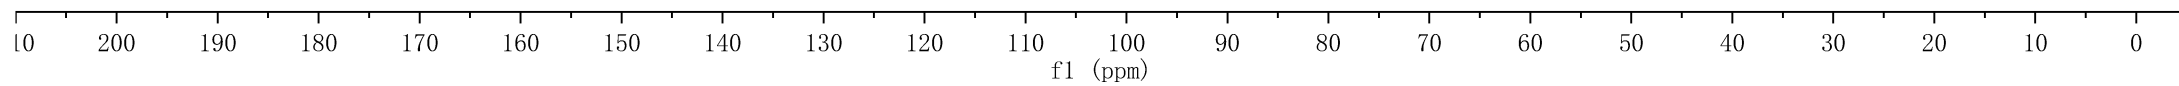



| Parameter                | Value               |
|--------------------------|---------------------|
| 1 Title                  | ZJJ-13-124-H        |
| 2 Origin                 | Bruker BioSpin GmbH |
| 3 Solvent                | CDCl3               |
| 4 Temperature            | 298.0               |
| 5 Number of Scans        | 8                   |
| 6 Acquisition Time       | 4.0894              |
| 7 Acquisition Date       | 2022-01-05T20:09:51 |
| 8 Spectrometer Frequency | 400.13              |
| 9 Spectral Width         | 8012.8              |

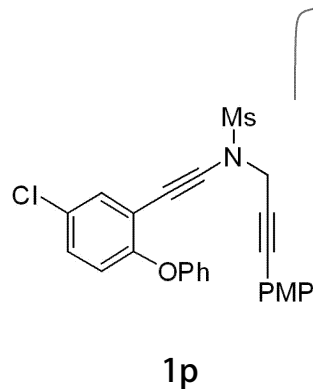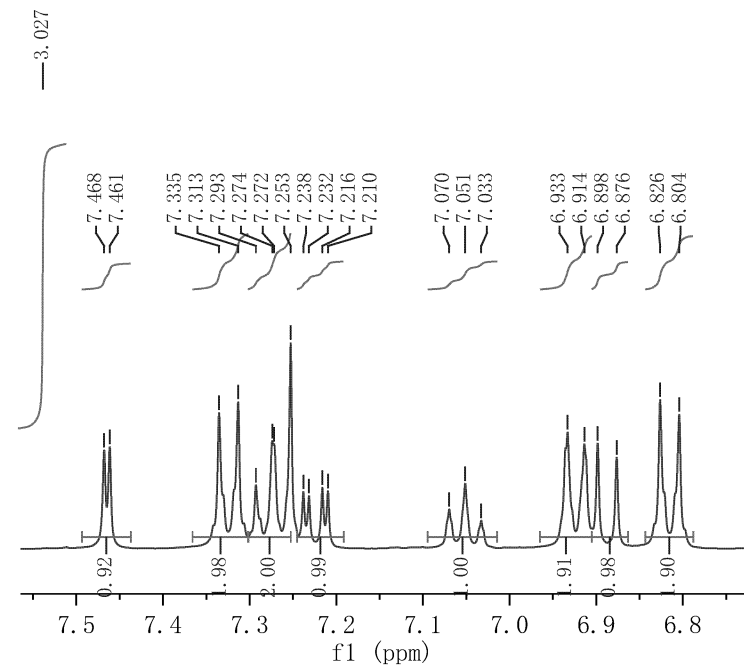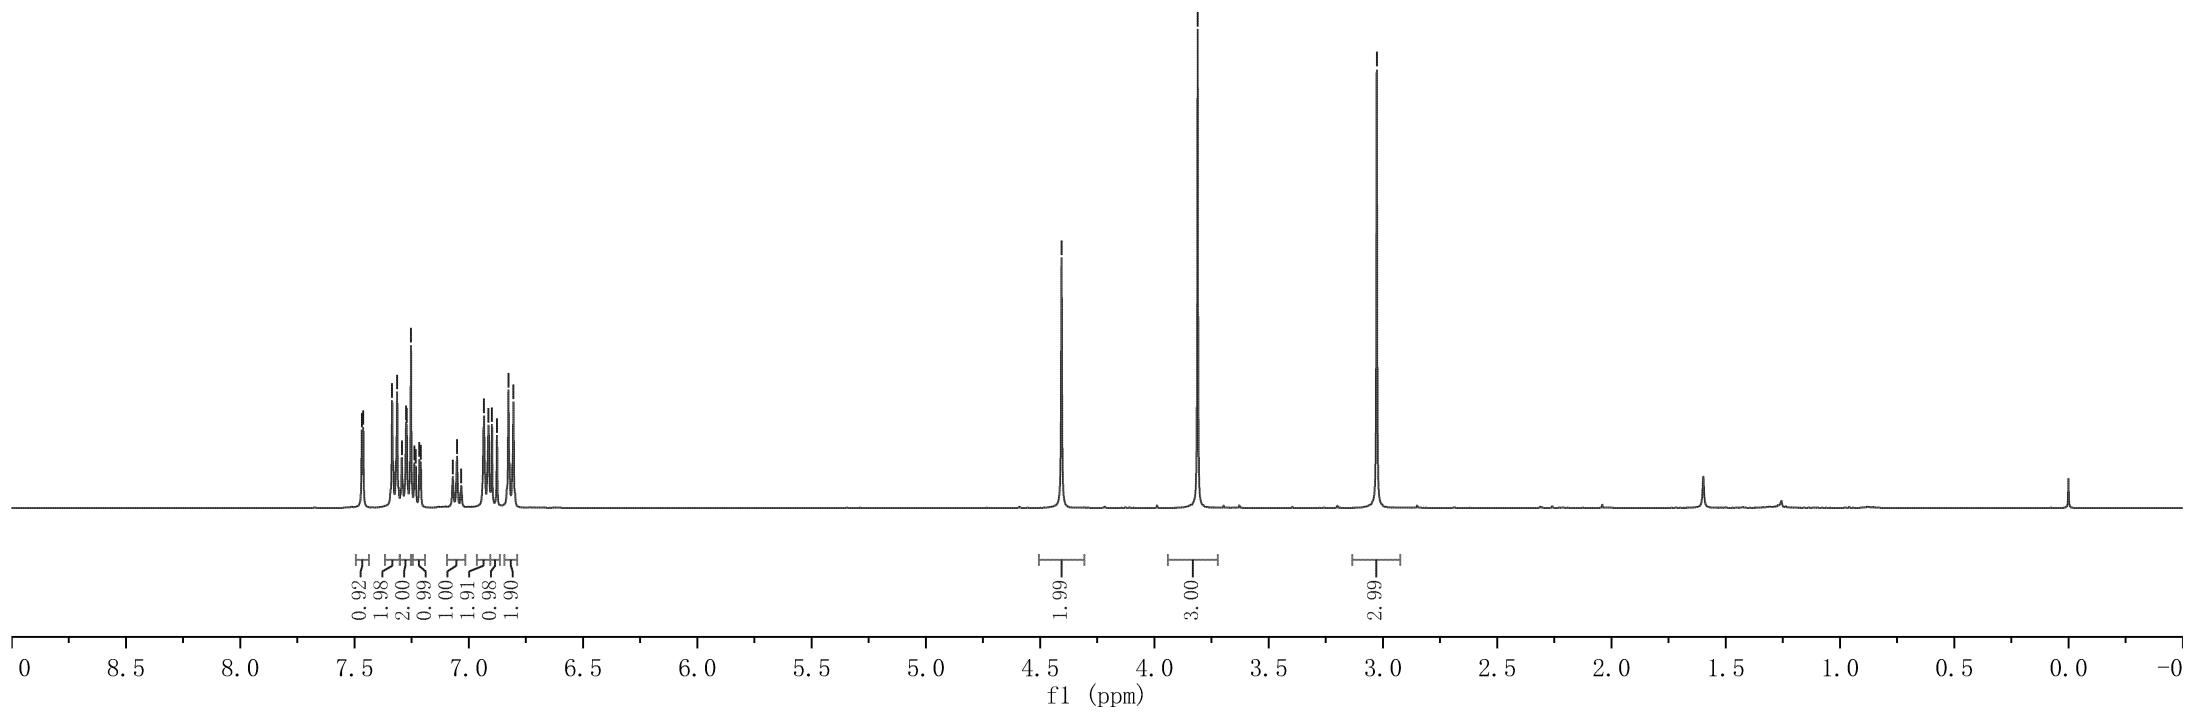

160.11  
157.07  
155.46

133.34  
132.83  
129.74  
129.50  
128.69  
123.15  
120.82  
117.75  
116.91  
114.02  
113.67

87.21  
87.04  
79.93  
77.32  
77.00  
76.68

66.16

55.29

42.99

38.56

| Parameter                | Value               |
|--------------------------|---------------------|
| 1 Title                  | ZJJ-13-124-C        |
| 2 Origin                 | Bruker BioSpin GmbH |
| 3 Solvent                | CDC13               |
| 4 Temperature            | 300.0               |
| 5 Number of Scans        | 44                  |
| 6 Acquisition Time       | 1.3631              |
| 7 Acquisition Date       | 2022-01-05T20:11:10 |
| 8 Spectrometer Frequency | 100.61              |
| 9 Spectral Width         | 24038.5             |

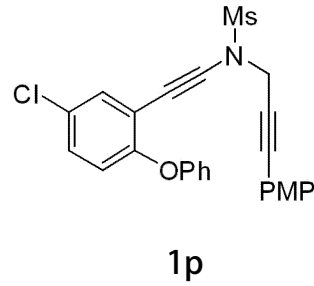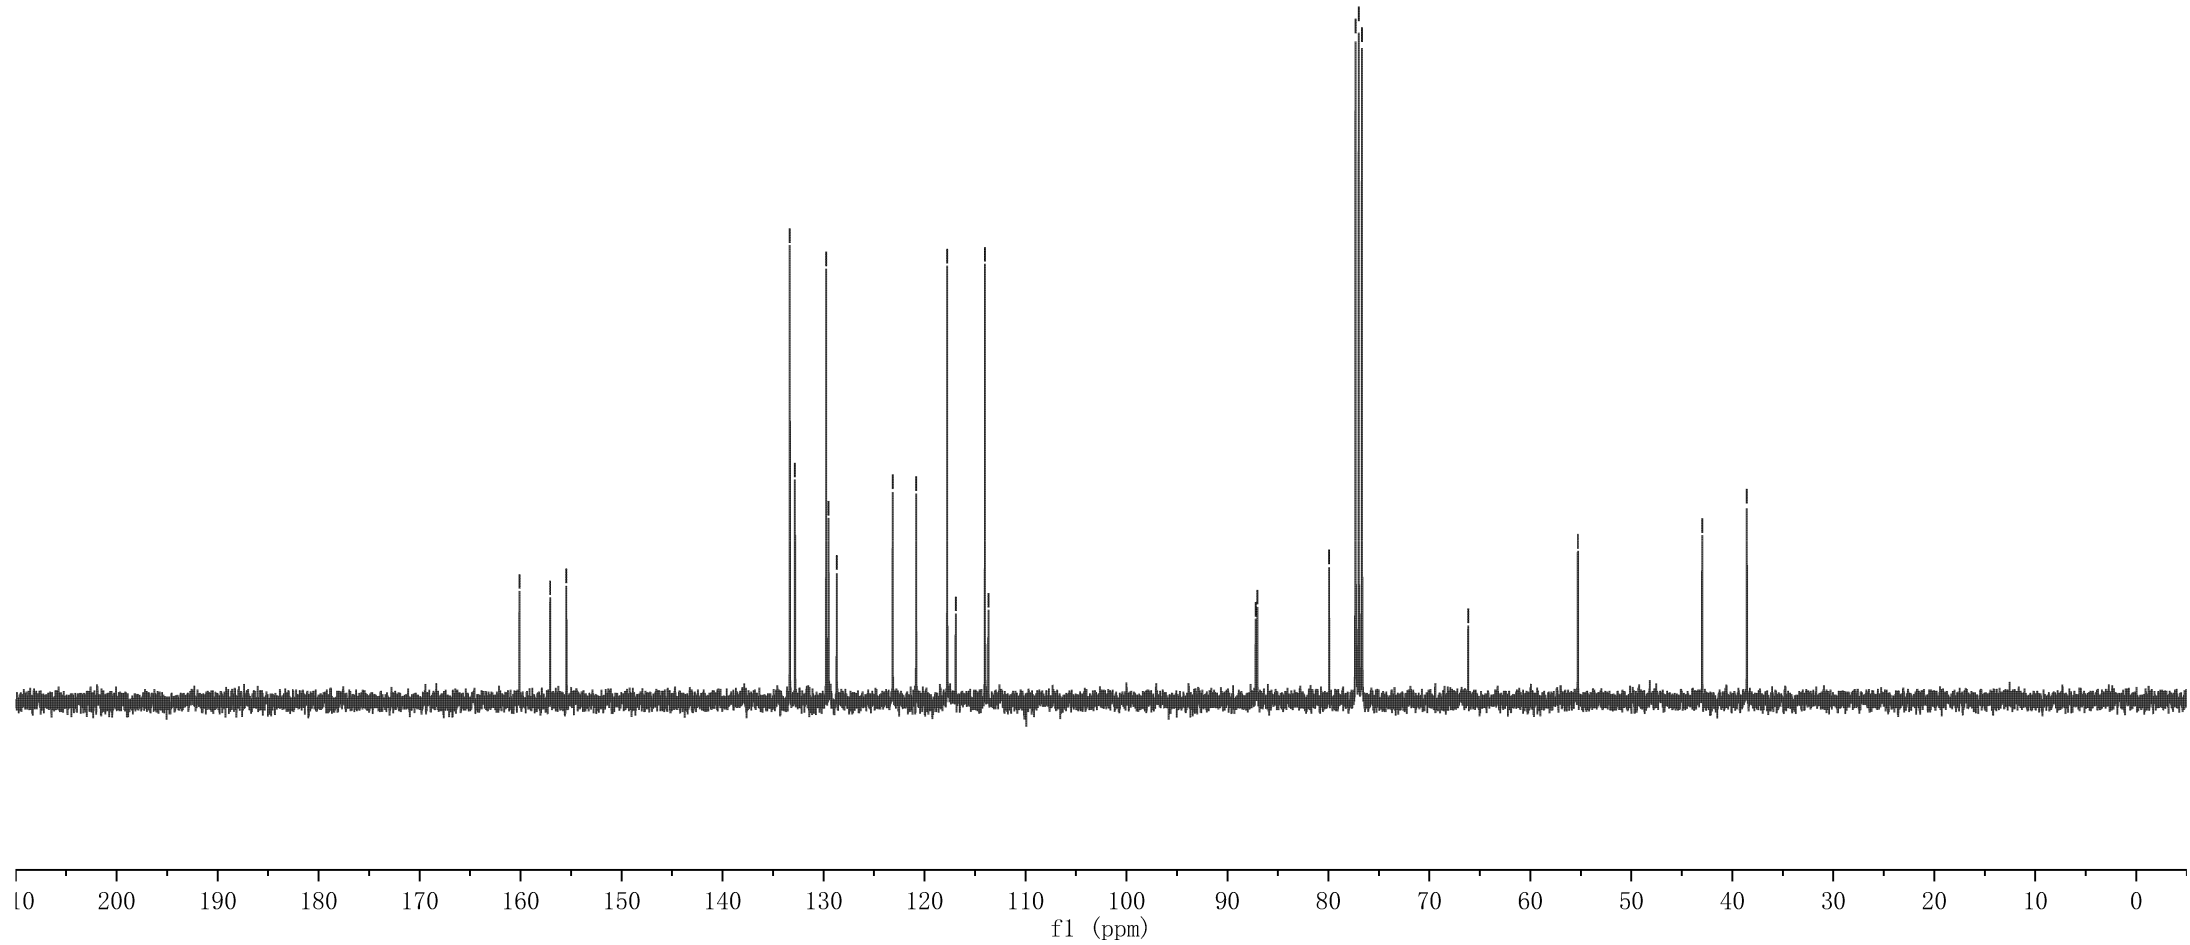

7.609  
7.603  
7.364  
7.358  
7.342  
7.336  
7.330  
7.308  
7.290  
7.271  
7.250  
7.241  
7.070  
7.051  
7.033  
6.933  
6.913  
6.825  
6.818  
6.803  
6.796

4.402

3.796

3.028

| Parameter                | Value               |
|--------------------------|---------------------|
| 1 Title                  | zjj13-205-H         |
| 2 Origin                 | Bruker BioSpin GmbH |
| 3 Solvent                | CDCl3               |
| 4 Temperature            | 298.0               |
| 5 Number of Scans        | 5                   |
| 6 Acquisition Time       | 4.0894              |
| 7 Acquisition Date       | 2022-02-27T16:55:27 |
| 8 Spectrometer Frequency | 400.13              |
| 9 Spectral Width         | 8012.8              |

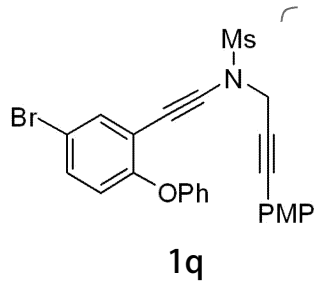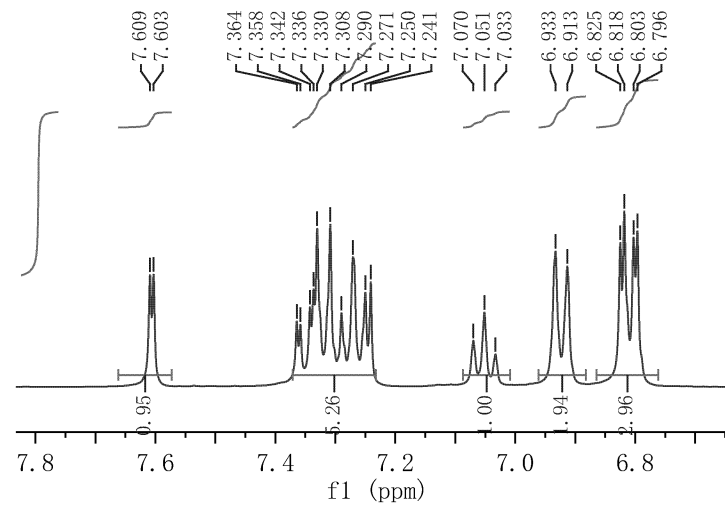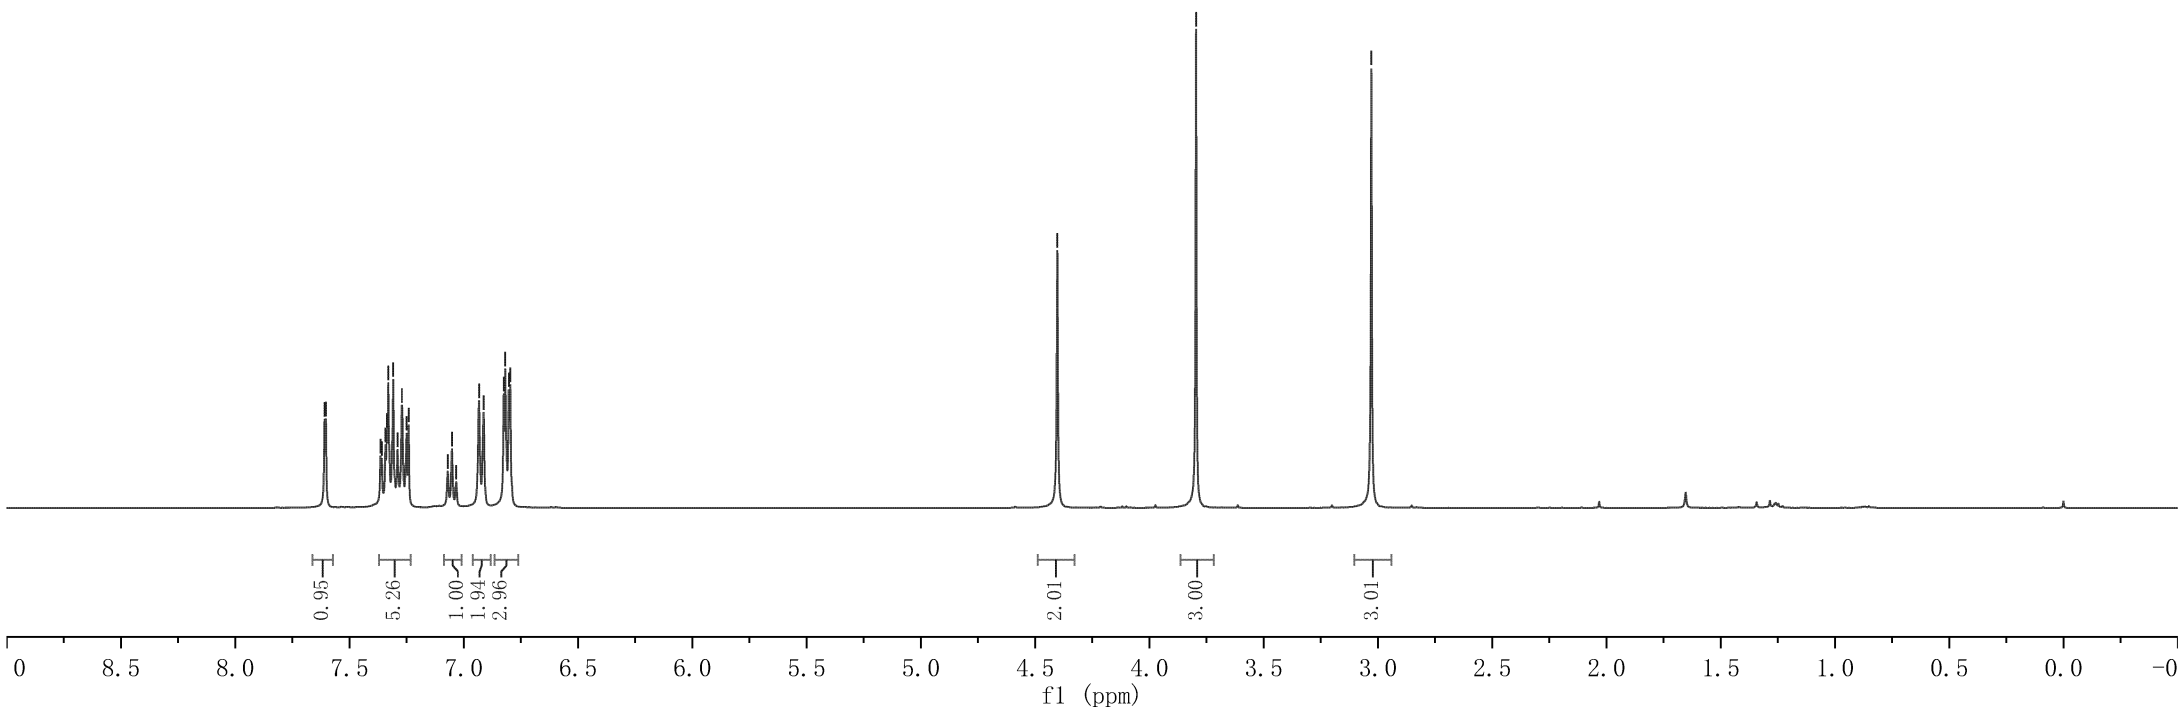

160.04  
156.85  
155.98

135.65  
133.27  
132.36  
129.70  
123.18  
121.00  
117.79  
117.22  
115.85  
113.96  
113.58

87.28  
87.01  
79.88  
77.32  
77.20  
77.00  
76.68

65.98

55.23

42.92  
38.50

| Parameter                | Value               |
|--------------------------|---------------------|
| 1 Title                  | zjj-13-205-C        |
| 2 Origin                 | Bruker BioSpin GmbH |
| 3 Solvent                | CDC13               |
| 4 Temperature            | 300.0               |
| 5 Number of Scans        | 28                  |
| 6 Acquisition Time       | 1.3631              |
| 7 Acquisition Date       | 2022-02-27T16:57:32 |
| 8 Spectrometer Frequency | 100.61              |
| 9 Spectral Width         | 24038.5             |

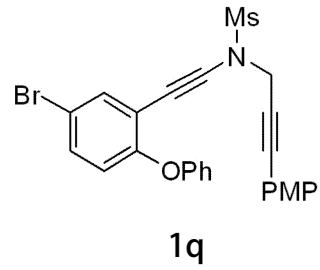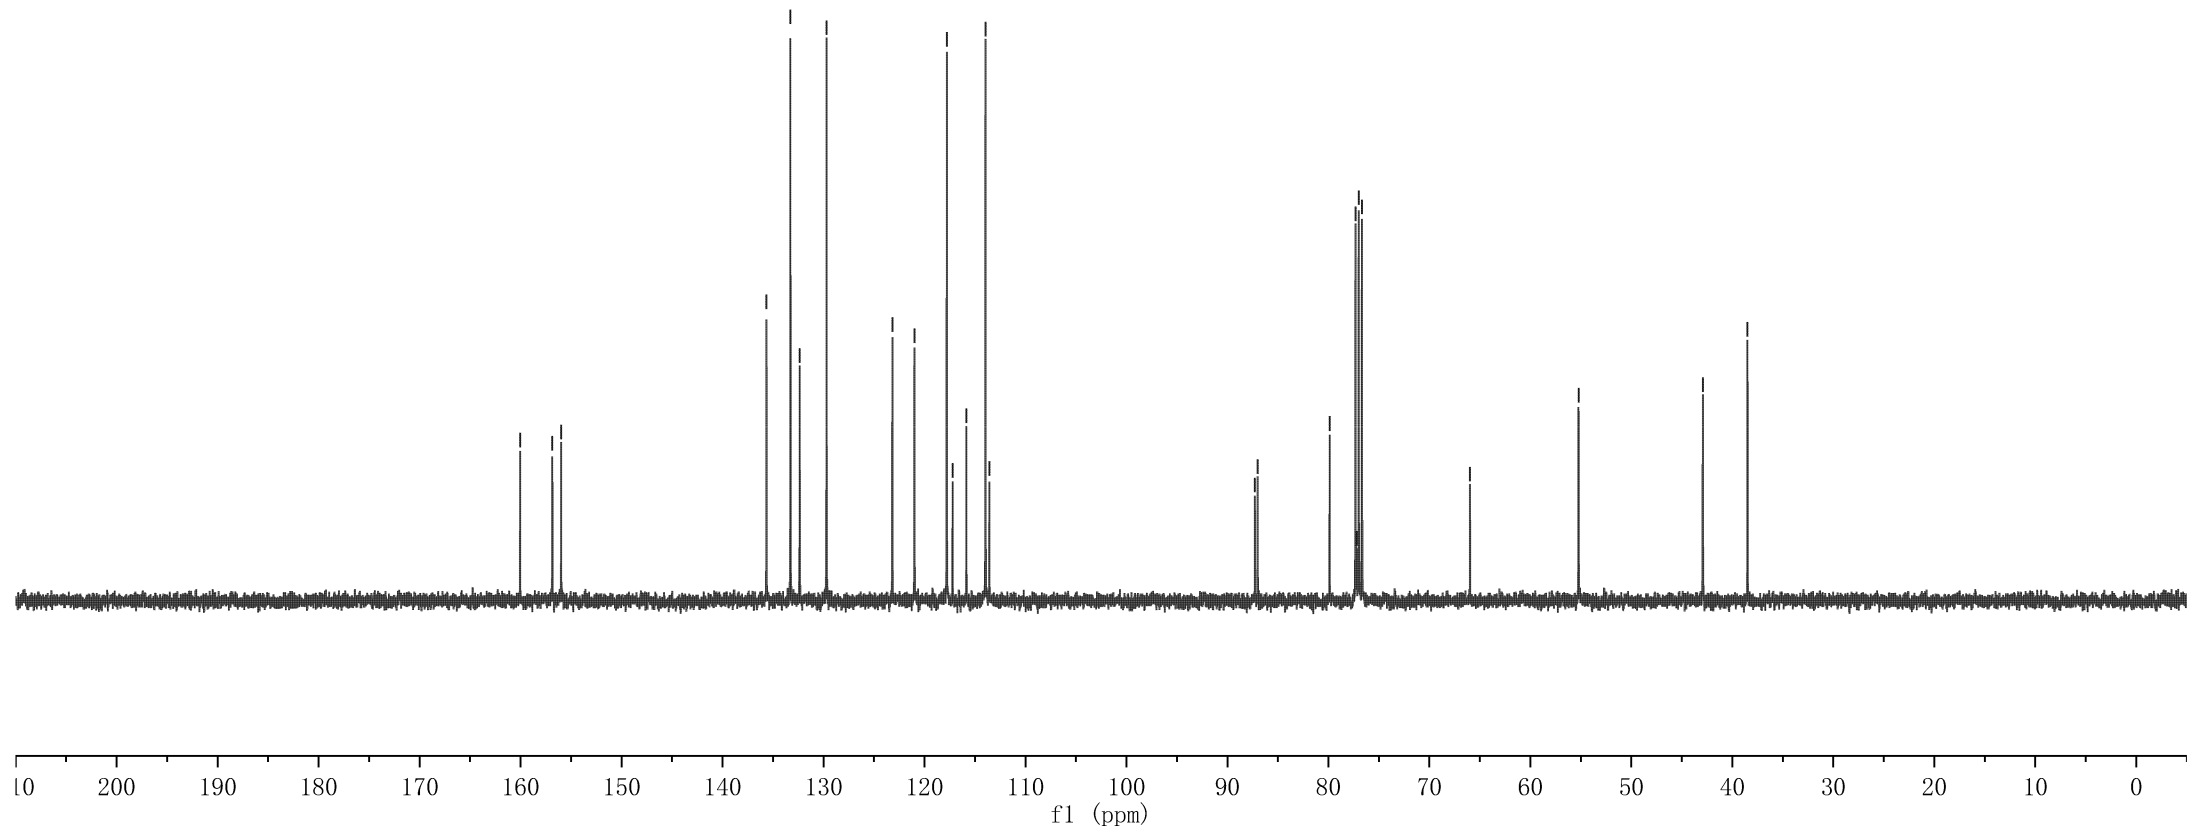

7.589  
7.586  
7.569  
7.566  
7.448  
7.445  
7.429  
7.426  
7.363  
7.341  
7.230  
7.215  
7.195  
7.175  
7.072  
7.052  
7.032  
6.961  
6.943  
6.924  
6.863  
6.841  
6.827  
6.807

| Parameter                | Value               |
|--------------------------|---------------------|
| 1 Title                  | LFS-2-133-H         |
| 2 Origin                 |                     |
| 3 Solvent                | CDCl3               |
| 4 Temperature            | 297.5               |
| 5 Number of Scans        | 16                  |
| 6 Acquisition Time       | 4.0002              |
| 7 Acquisition Date       | 2022-04-02T15:01:05 |
| 8 Spectrometer Frequency | 399.93              |
| 9 Spectral Width         | 8012.0              |

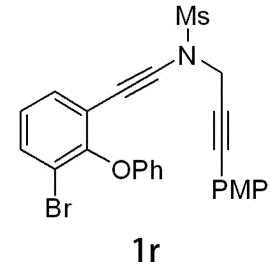

4.282

3.793

2.805

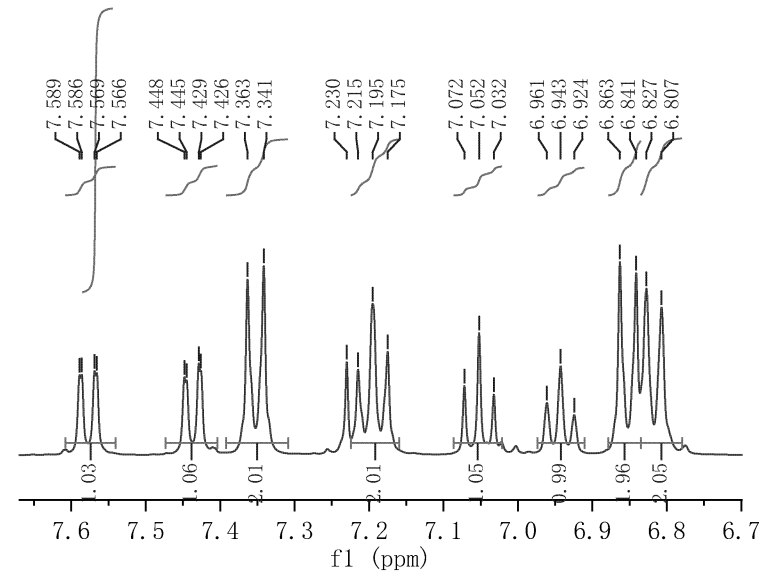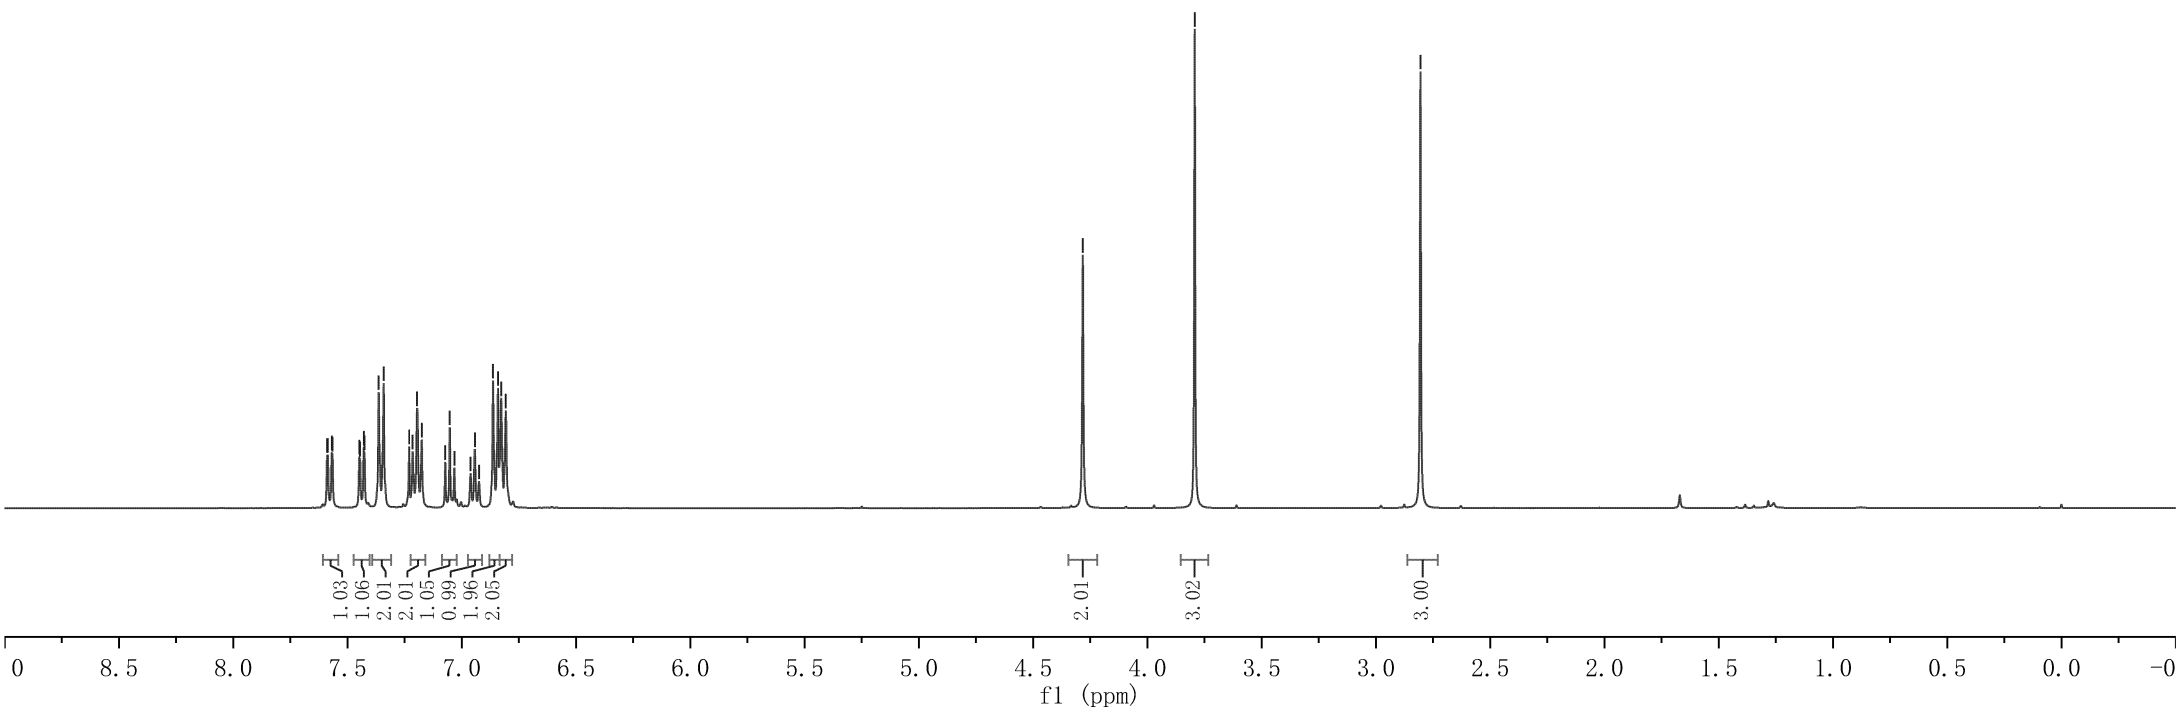

160.04  
157.05  
151.92

133.42  
133.25  
132.31  
129.42  
126.09  
122.01  
119.23  
117.76  
115.10  
113.95  
113.53

87.30  
86.84  
79.86  
77.32  
77.00  
76.68

66.18

55.20

42.82  
38.34

| Parameter                | Value               |
|--------------------------|---------------------|
| 1 Title                  | LFS-2-133-C         |
| 2 Origin                 |                     |
| 3 Solvent                | CDC13               |
| 4 Temperature            | 297.5               |
| 5 Number of Scans        | 300                 |
| 6 Acquisition Time       | 1.0000              |
| 7 Acquisition Date       | 2022-04-02T15:13:23 |
| 8 Spectrometer Frequency | 100.56              |
| 9 Spectral Width         | 26041.0             |

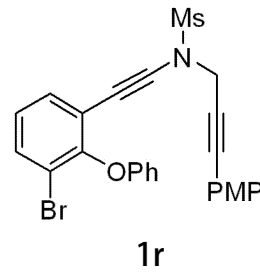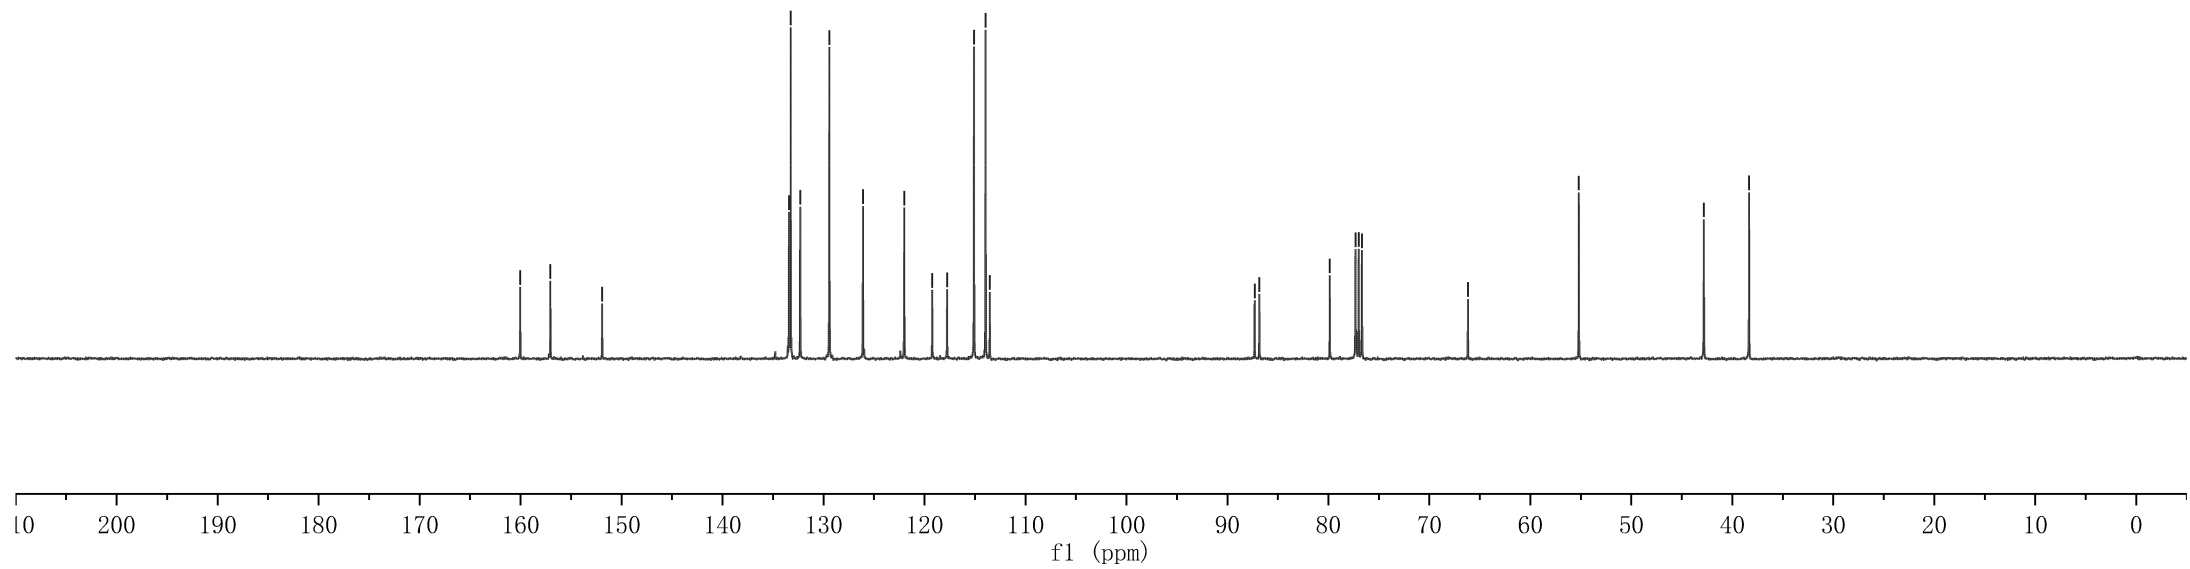



7.336  
7.315  
7.289  
7.269  
7.235  
7.182  
7.161  
7.141  
7.092  
7.073  
6.963  
6.824  
6.809  
6.788

4.442

3.781

3.120

| Parameter                | Value               |
|--------------------------|---------------------|
| 1 Title                  | zjj-13-187-re-H     |
| 2 Origin                 | Bruker BioSpin GmbH |
| 3 Solvent                | CDCl3               |
| 4 Temperature            | 298.0               |
| 5 Number of Scans        | 7                   |
| 6 Acquisition Time       | 4.0894              |
| 7 Acquisition Date       | 2022-02-17T17:02:13 |
| 8 Spectrometer Frequency | 400.13              |
| 9 Spectral Width         | 8012.8              |

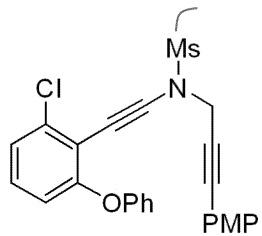

**1s**

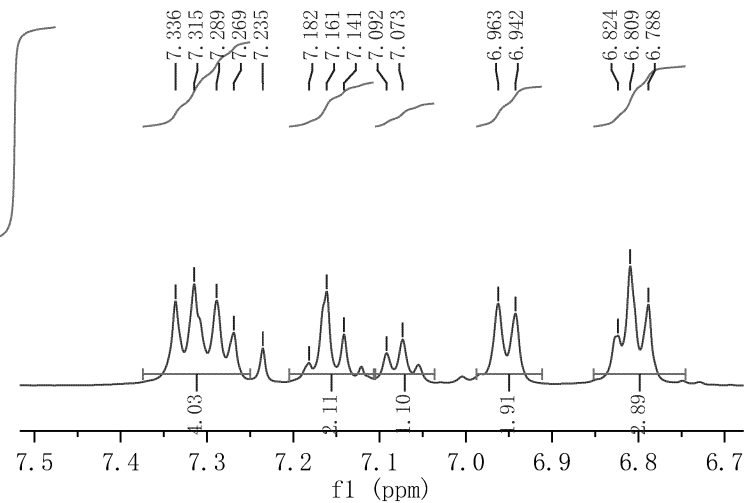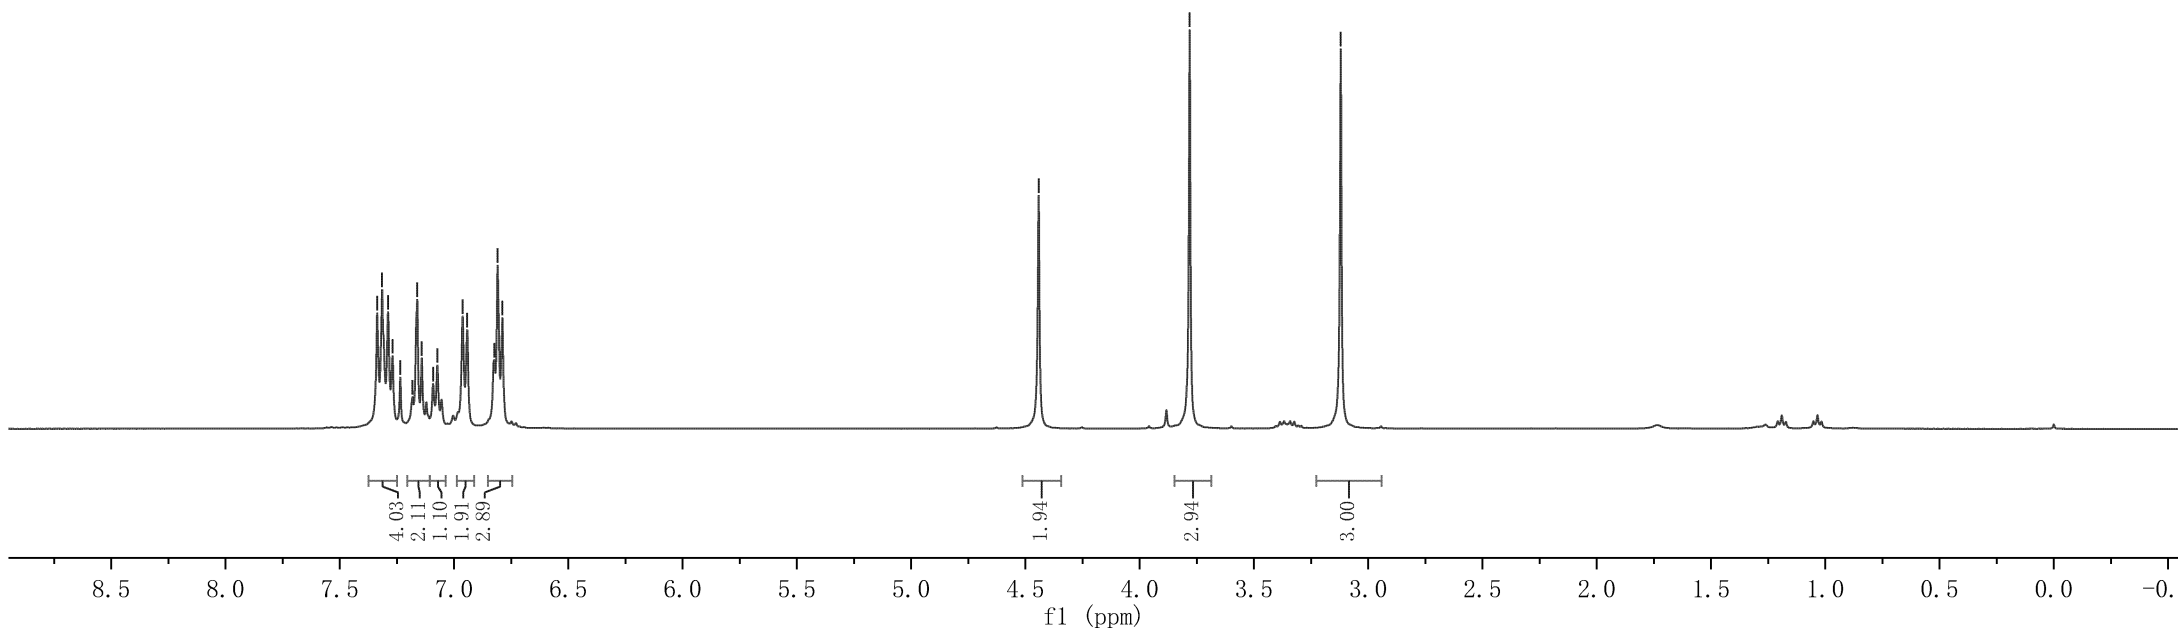

159.97  
157.99  
156.60

136.95  
133.25  
129.68  
129.01

124.18  
123.38  
118.18  
117.11  
115.52  
113.90  
113.63

90.96  
86.91

79.93  
77.32  
77.00  
76.68

64.68

55.18

42.96  
38.48

| Parameter                | Value               |
|--------------------------|---------------------|
| 1 Title                  | zjj-13-187-re-C     |
| 2 Origin                 | Bruker BioSpin GmbH |
| 3 Solvent                | CDC13               |
| 4 Temperature            | 300.0               |
| 5 Number of Scans        | 12                  |
| 6 Acquisition Time       | 1.3631              |
| 7 Acquisition Date       | 2022-02-17T17:03:49 |
| 8 Spectrometer Frequency | 100.61              |
| 9 Spectral Width         | 24038.5             |

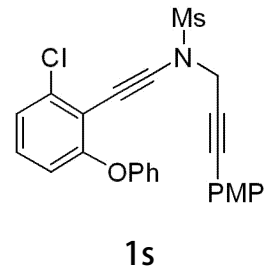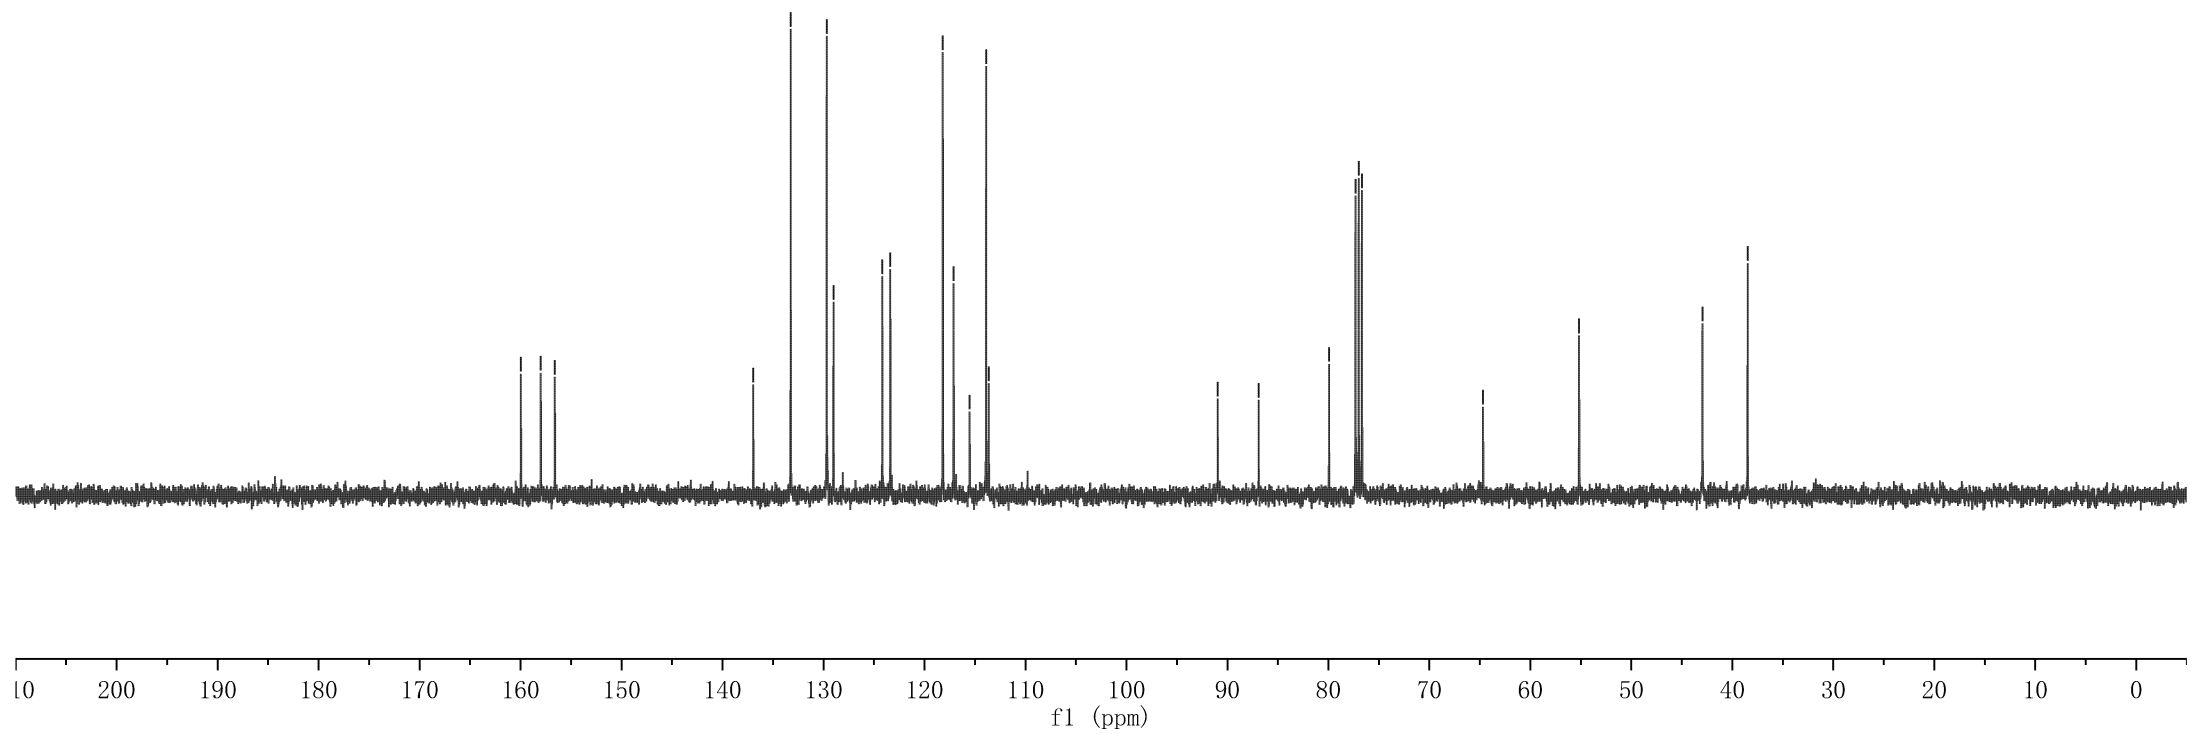



| Parameter                | Value               |
|--------------------------|---------------------|
| 1 Title                  | zjj-13-Ph-4-OBn-C   |
| 2 Origin                 | Bruker BioSpin GmbH |
| 3 Solvent                | CDCl3               |
| 4 Temperature            | 300.0               |
| 5 Number of Scans        | 36                  |
| 6 Acquisition Time       | 1.3631              |
| 7 Acquisition Date       | 2022-03-28T15:47:14 |
| 8 Spectrometer Frequency | 100.61              |
| 9 Spectral Width         | 24038.5             |

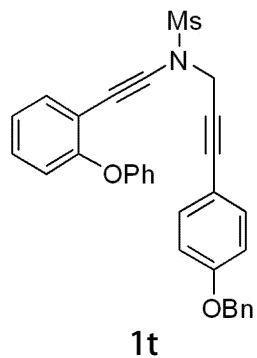

159.18  
157.41  
156.90

136.38  
133.63  
133.33  
133.33  
129.70  
129.60  
128.60  
128.10  
127.38  
123.79  
122.75  
119.79  
117.66  
115.32  
114.88  
114.05

86.81  
86.03  
80.21  
77.32  
77.00  
76.68  
69.97  
66.97

42.99  
38.29

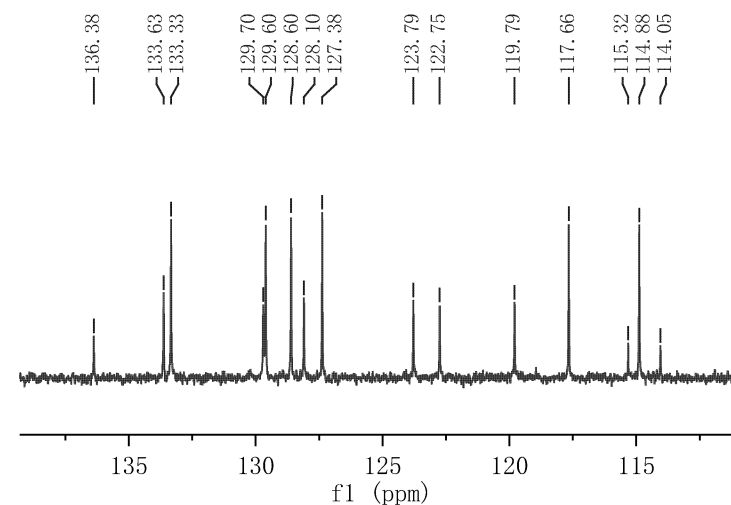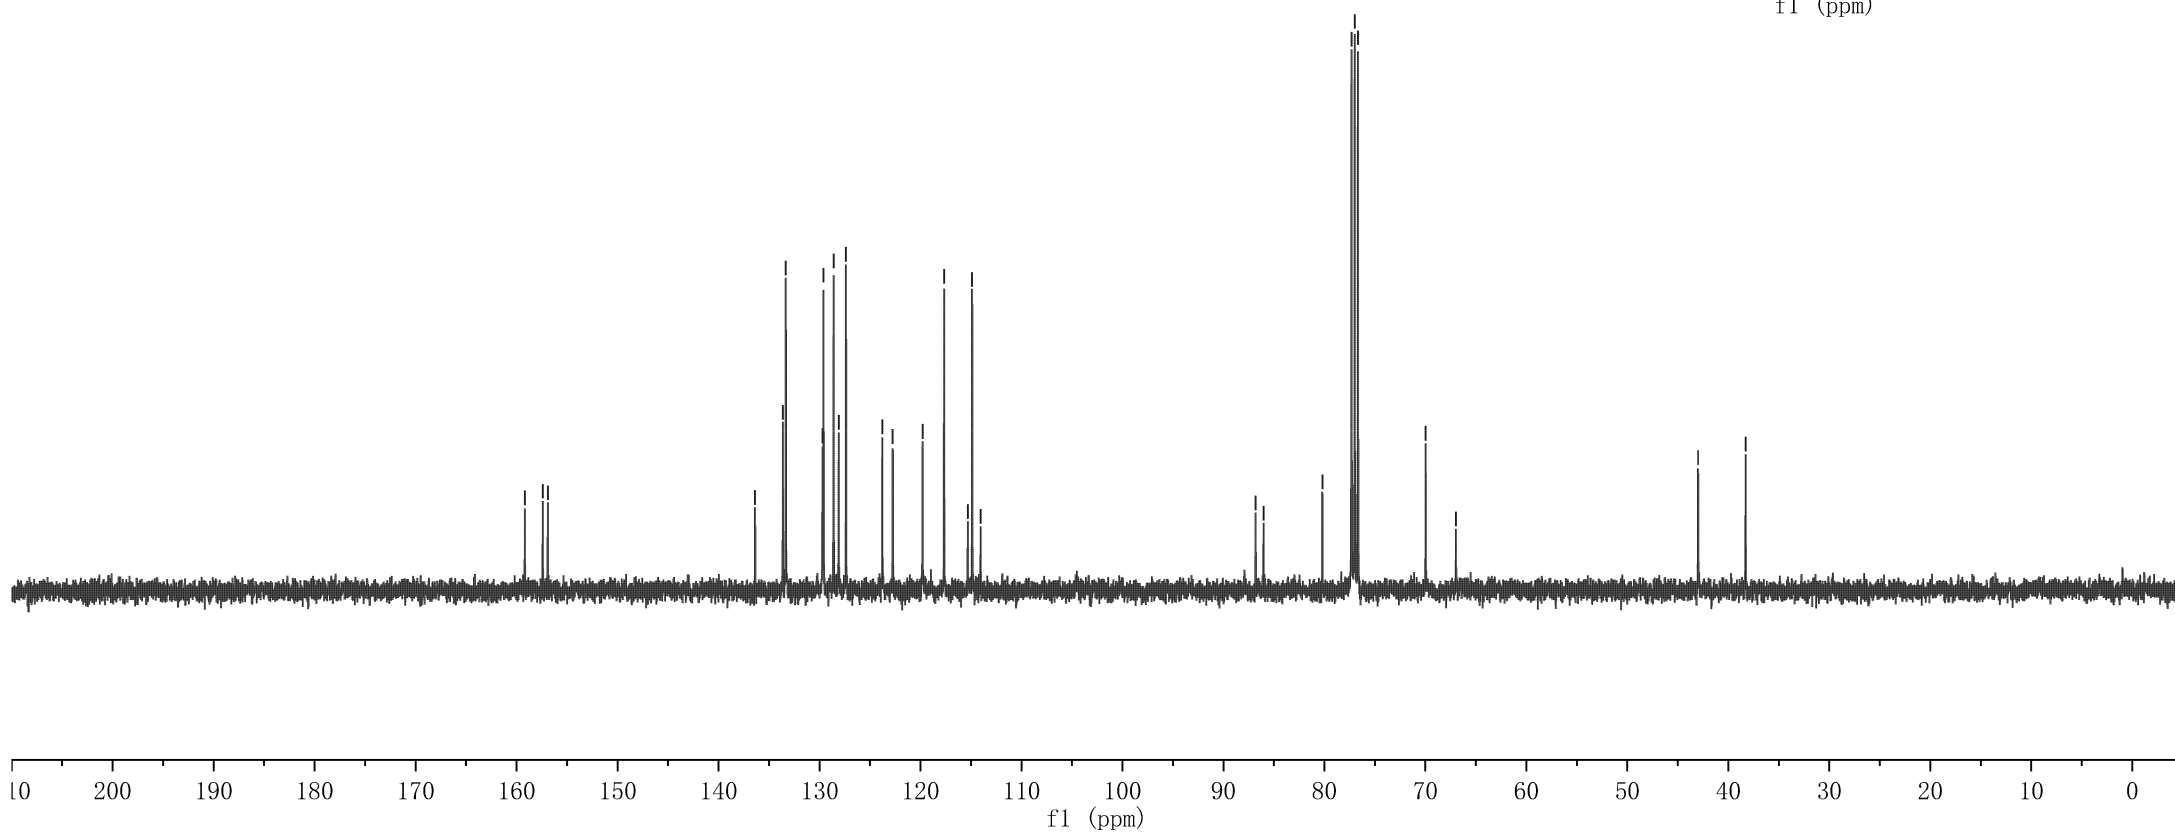

7.491  
7.473  
7.331  
7.314  
7.297  
7.232  
7.214  
7.196  
7.129  
7.111  
7.093  
7.065  
7.046  
7.027  
6.997  
6.977  
6.919  
6.899  
6.868  
6.847

| Parameter                | Value               |
|--------------------------|---------------------|
| 1 Title                  | LFS-2-152-H         |
| 2 Origin                 | Bruker BioSpin GmbH |
| 3 Solvent                | CDCl3               |
| 4 Temperature            | 298.0               |
| 5 Number of Scans        | 13                  |
| 6 Acquisition Time       | 4.0894              |
| 7 Acquisition Date       | 2022-04-10T13:43:52 |
| 8 Spectrometer Frequency | 400.13              |
| 9 Spectral Width         | 8012.8              |

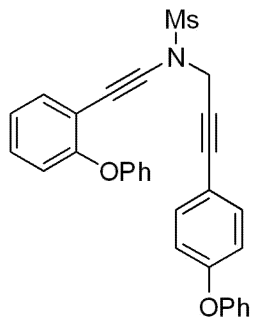

4.375

2.982

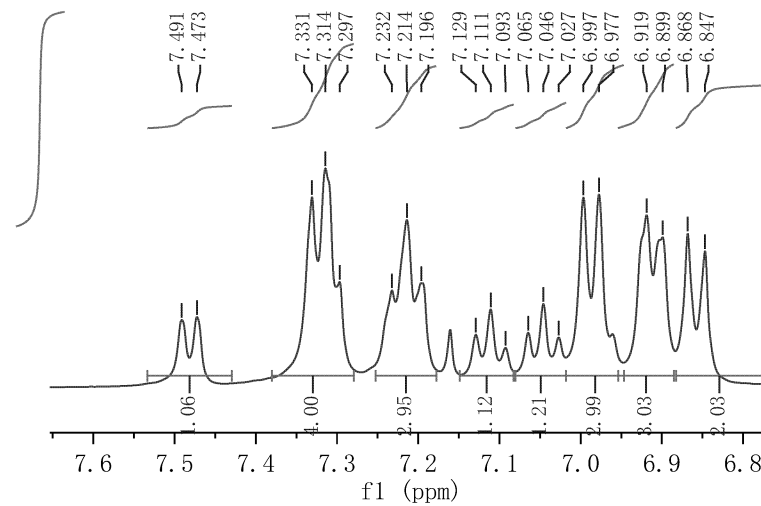

1.06  
4.00  
2.95  
1.12  
1.21  
2.99  
3.03  
2.03

1.98

3.00

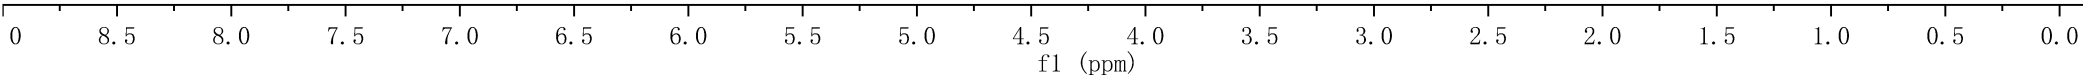

157.90  
157.12  
156.69  
155.82

133.41  
133.27  
129.71  
129.57  
129.44  
123.85  
123.60  
122.64  
119.50  
119.28  
117.92  
117.48  
115.88  
114.99

86.24  
85.91  
80.79  
77.32  
77.00  
76.68  
66.86

42.59  
38.01

| Parameter                | Value               |
|--------------------------|---------------------|
| 1 Title                  | LFS-2-152-C         |
| 2 Origin                 | Bruker BioSpin GmbH |
| 3 Solvent                | CDC13               |
| 4 Temperature            | 300.0               |
| 5 Number of Scans        | 48                  |
| 6 Acquisition Time       | 1.3631              |
| 7 Acquisition Date       | 2022-04-10T13:47:18 |
| 8 Spectrometer Frequency | 100.61              |
| 9 Spectral Width         | 24038.5             |

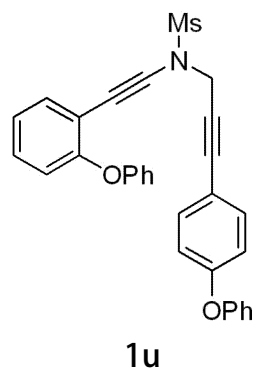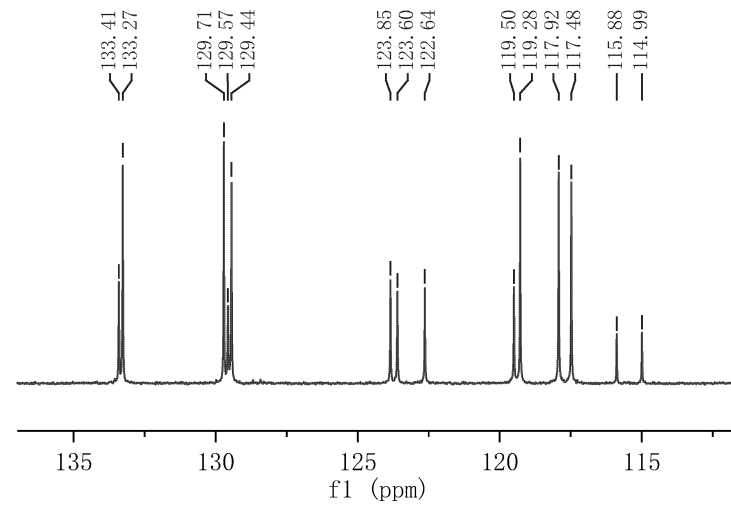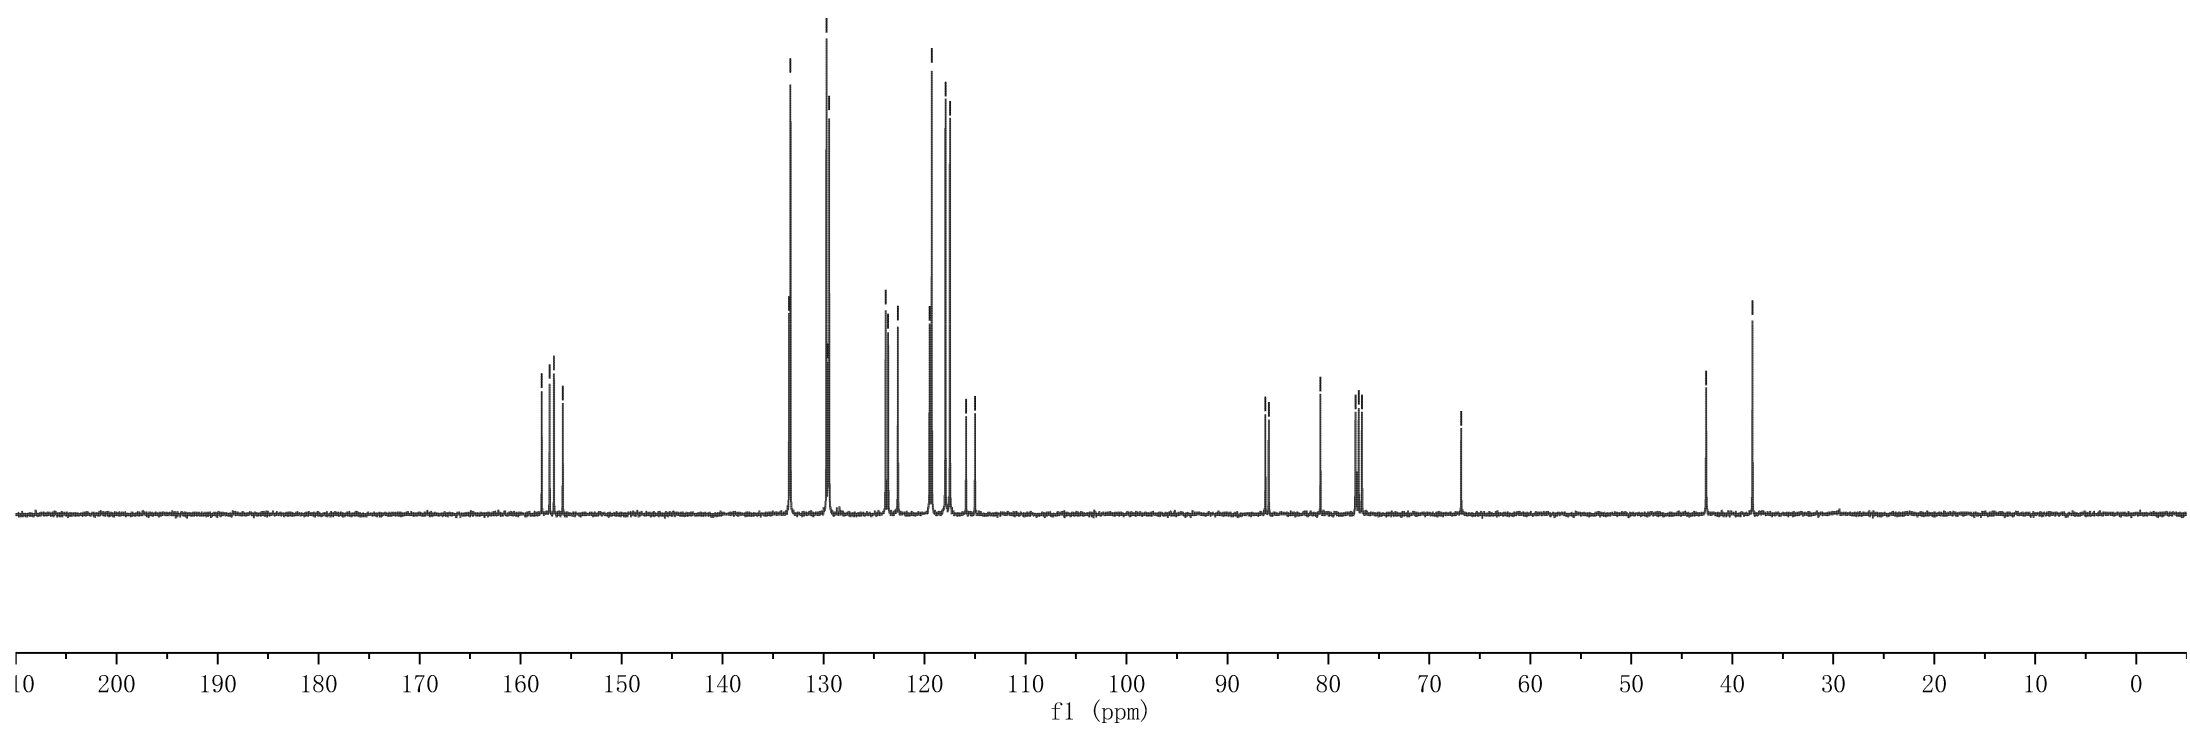

7.511  
7.508  
7.492  
7.489  
7.293  
7.273  
7.267  
7.263  
7.248  
7.237  
7.227  
7.116  
7.106  
7.100  
7.087  
7.036  
7.018  
6.999  
6.978  
6.957  
6.927  
6.908

4.403

3.001

2.347

| Parameter                | Value               |
|--------------------------|---------------------|
| 1 Title                  | zjj-Ph-4-Me-II      |
| 2 Origin                 | Bruker BioSpin GmbH |
| 3 Solvent                | CDC13               |
| 4 Temperature            | 298.0               |
| 5 Number of Scans        | 8                   |
| 6 Acquisition Time       | 4.0894              |
| 7 Acquisition Date       | 2022-04-11T19:39:20 |
| 8 Spectrometer Frequency | 400.13              |
| 9 Spectral Width         | 8012.8              |

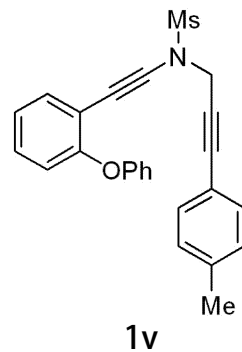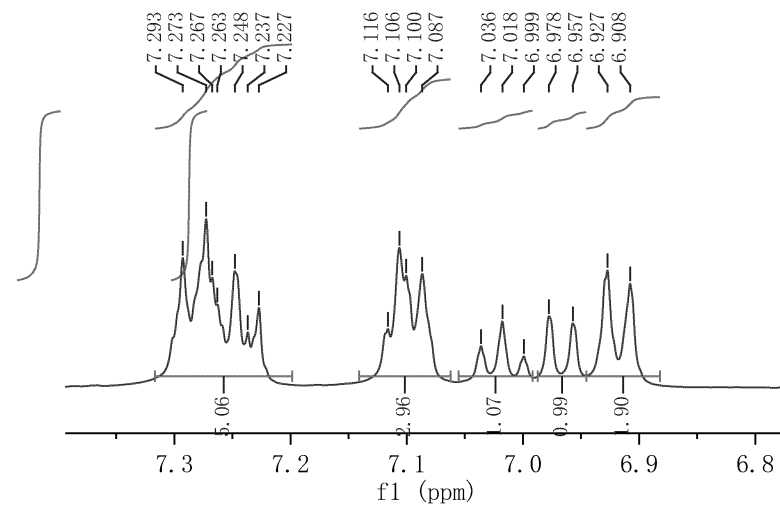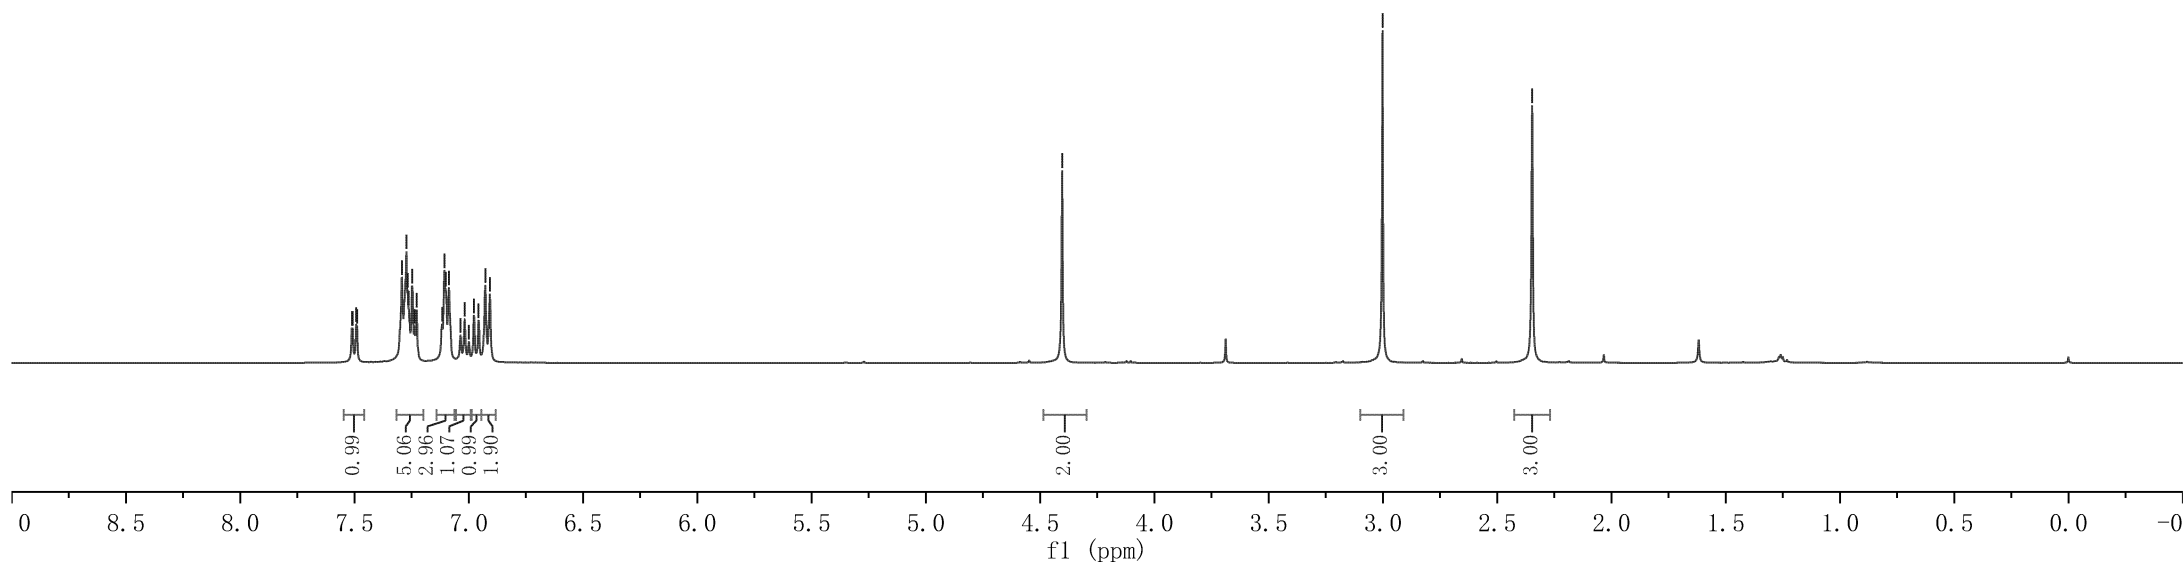

| Parameter                | Value               |
|--------------------------|---------------------|
| 1 Title                  | zjj-Ph-4-Me-diwu-C  |
| 2 Origin                 | Bruker BioSpin GmbH |
| 3 Solvent                | CDC13               |
| 4 Temperature            | 300.0               |
| 5 Number of Scans        | 24                  |
| 6 Acquisition Time       | 1.3631              |
| 7 Acquisition Date       | 2022-04-11T19:40:46 |
| 8 Spectrometer Frequency | 100.61              |
| 9 Spectral Width         | 24038.5             |

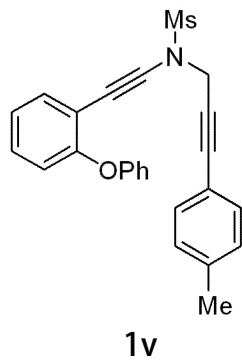

157.42  
156.86

139.13  
133.61  
131.69  
129.70  
129.59  
129.09  
123.80  
122.71  
119.85  
118.66  
117.61  
115.34

87.01  
86.01  
80.79  
77.32  
77.00  
76.68

66.98

42.94  
38.28

21.45

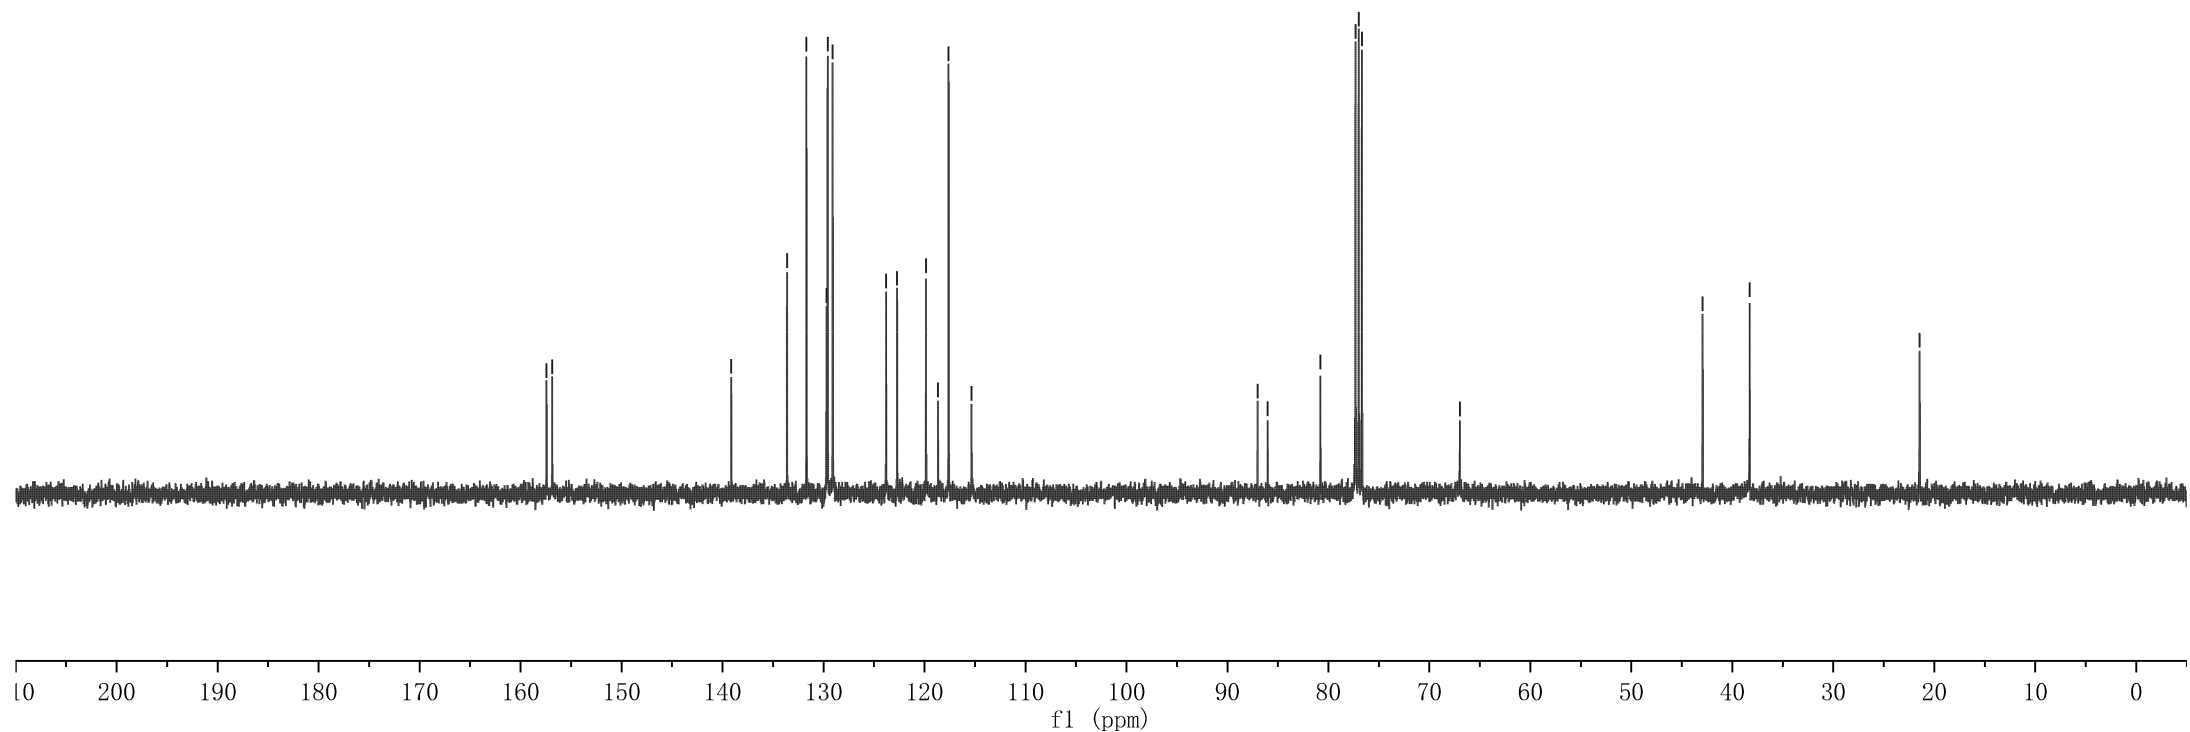



7.504  
7.500  
7.485  
7.481  
7.343  
7.321  
7.305  
7.283  
7.276  
7.272  
7.254  
7.236  
7.233  
7.214  
7.195  
7.096  
7.094  
7.077  
7.075  
7.058  
7.056  
7.026  
7.008  
6.989  
6.959  
6.957  
6.938  
6.936  
6.930  
6.928  
6.908

| Parameter                | Value               |
|--------------------------|---------------------|
| 1 Title                  | LFS-2-175-H         |
| 2 Origin                 | Bruker BioSpin GmbH |
| 3 Solvent                | CDC13               |
| 4 Temperature            | 298.0               |
| 5 Number of Scans        | 12                  |
| 6 Acquisition Time       | 4.0894              |
| 7 Acquisition Date       | 2022-04-18T22:12:31 |
| 8 Spectrometer Frequency | 400.13              |
| 9 Spectral Width         | 8012.8              |

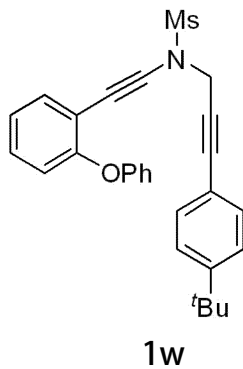

4.389

2.998

1.296

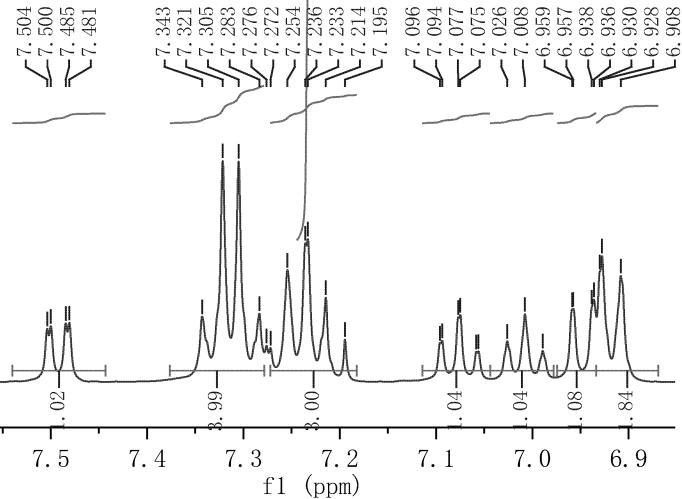

1.02  
3.99  
3.00  
1.04  
1.08  
1.84

1.97

3.00

9.02

0 8.5 8.0 7.5 7.0 6.5 6.0 5.5 5.0 4.5 4.0 3.5 3.0 2.5 2.0 1.5 1.0 0.5 0.0

f1 (ppm)

157.31  
156.80  
152.15

133.53  
131.49  
129.63  
129.52  
125.25  
123.70  
122.67  
119.69  
118.63  
117.59  
115.21

86.94  
85.99  
80.78  
77.32  
77.00  
76.68

66.91

42.84

38.16  
34.65  
30.98

| Parameter                | Value               |
|--------------------------|---------------------|
| 1 Title                  | LFS-2-175-C         |
| 2 Origin                 | Bruker BioSpin GmbH |
| 3 Solvent                | CDC13               |
| 4 Temperature            | 300.0               |
| 5 Number of Scans        | 22                  |
| 6 Acquisition Time       | 1.3631              |
| 7 Acquisition Date       | 2022-04-18T22:14:17 |
| 8 Spectrometer Frequency | 100.61              |
| 9 Spectral Width         | 24038.5             |

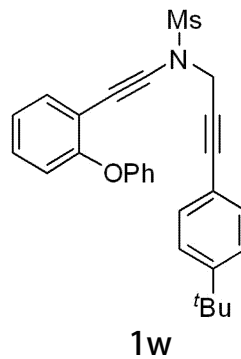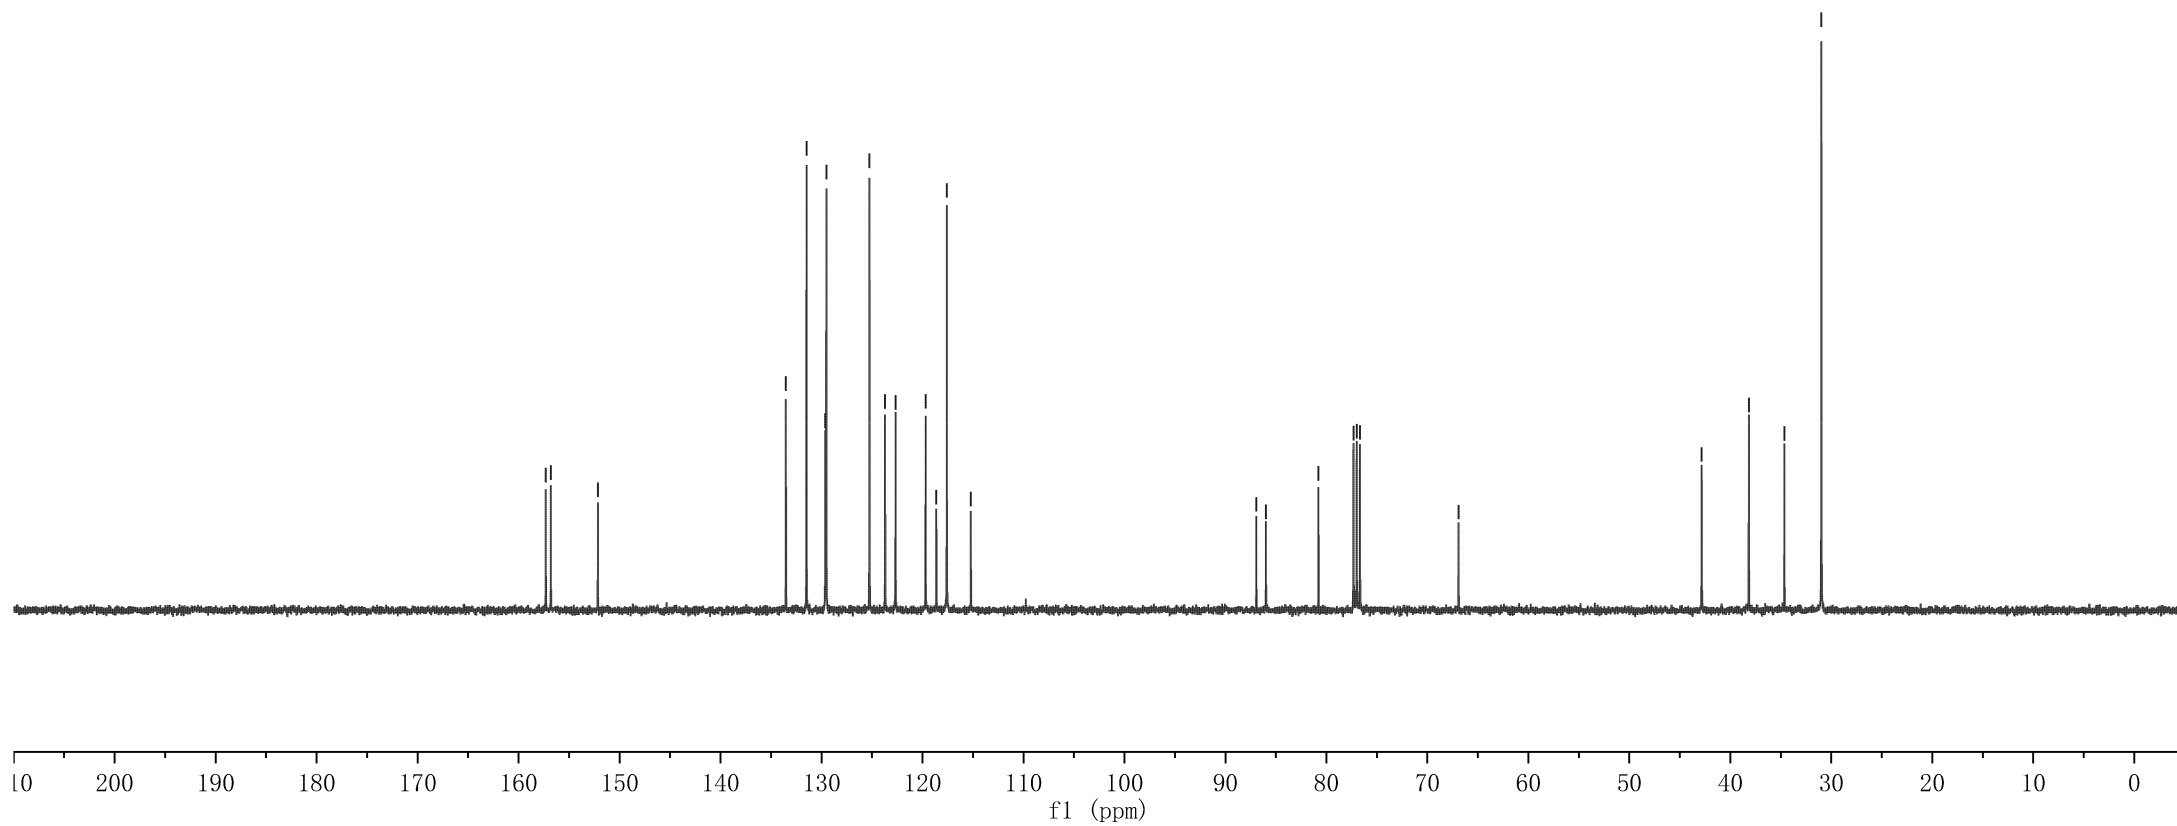

7.500  
7.481  
7.253  
7.233  
7.213  
7.177  
6.924  
6.906  
6.685

4.380  
3.789

2.987  
2.157

| Parameter                | Value               |
|--------------------------|---------------------|
| 1 Title                  | LFS-2-206-H         |
| 2 Origin                 |                     |
| 3 Solvent                | CDC13               |
| 4 Temperature            | 299.2               |
| 5 Number of Scans        | 16                  |
| 6 Acquisition Time       | 4.0002              |
| 7 Acquisition Date       | 2022-04-29T17:46:48 |
| 8 Spectrometer Frequency | 399.92              |
| 9 Spectral Width         | 8012.0              |

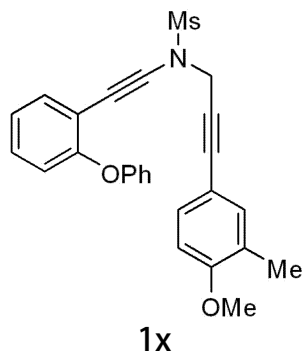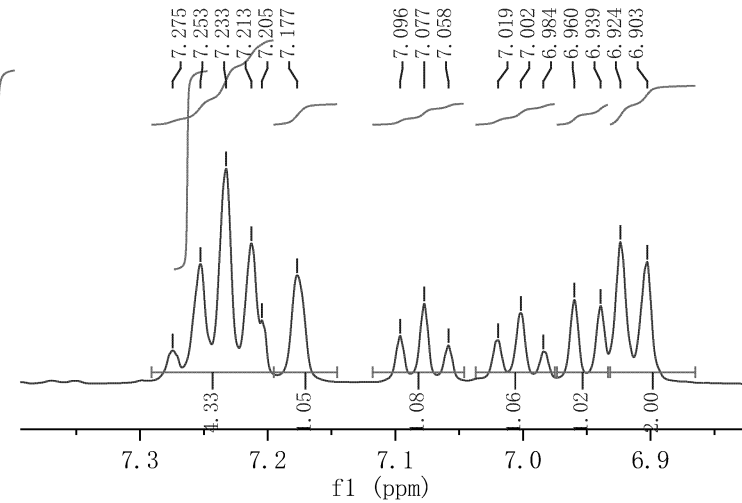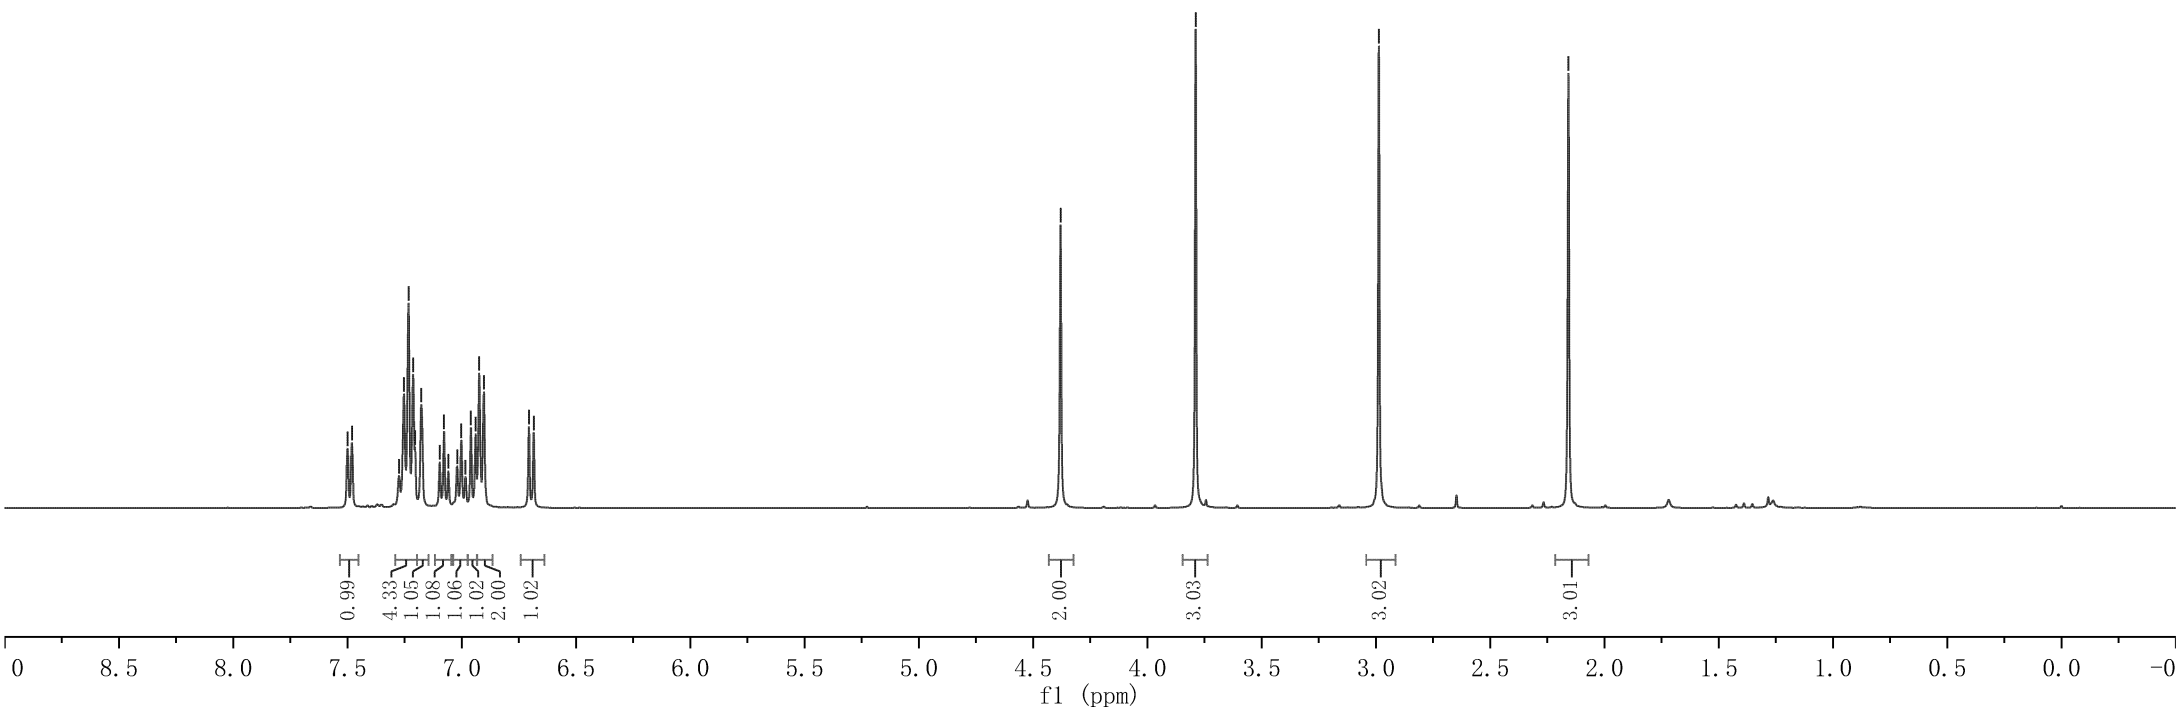

158.24  
157.30  
156.71

133.76  
133.48  
130.86  
129.58  
129.49  
126.73  
123.71  
122.62  
119.73  
117.49  
115.26  
113.07  
109.61

87.11  
86.10  
79.66  
77.32  
77.00  
76.68

66.83

55.17

42.93

38.16

15.86

| Parameter                | Value               |
|--------------------------|---------------------|
| 1 Title                  | LFS-2-206-C         |
| 2 Origin                 |                     |
| 3 Solvent                | CDC13               |
| 4 Temperature            | 299.2               |
| 5 Number of Scans        | 200                 |
| 6 Acquisition Time       | 1.0000              |
| 7 Acquisition Date       | 2022-04-29T17:55:53 |
| 8 Spectrometer Frequency | 100.56              |
| 9 Spectral Width         | 26041.0             |

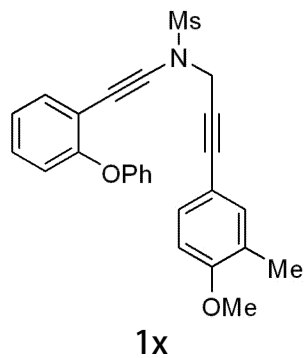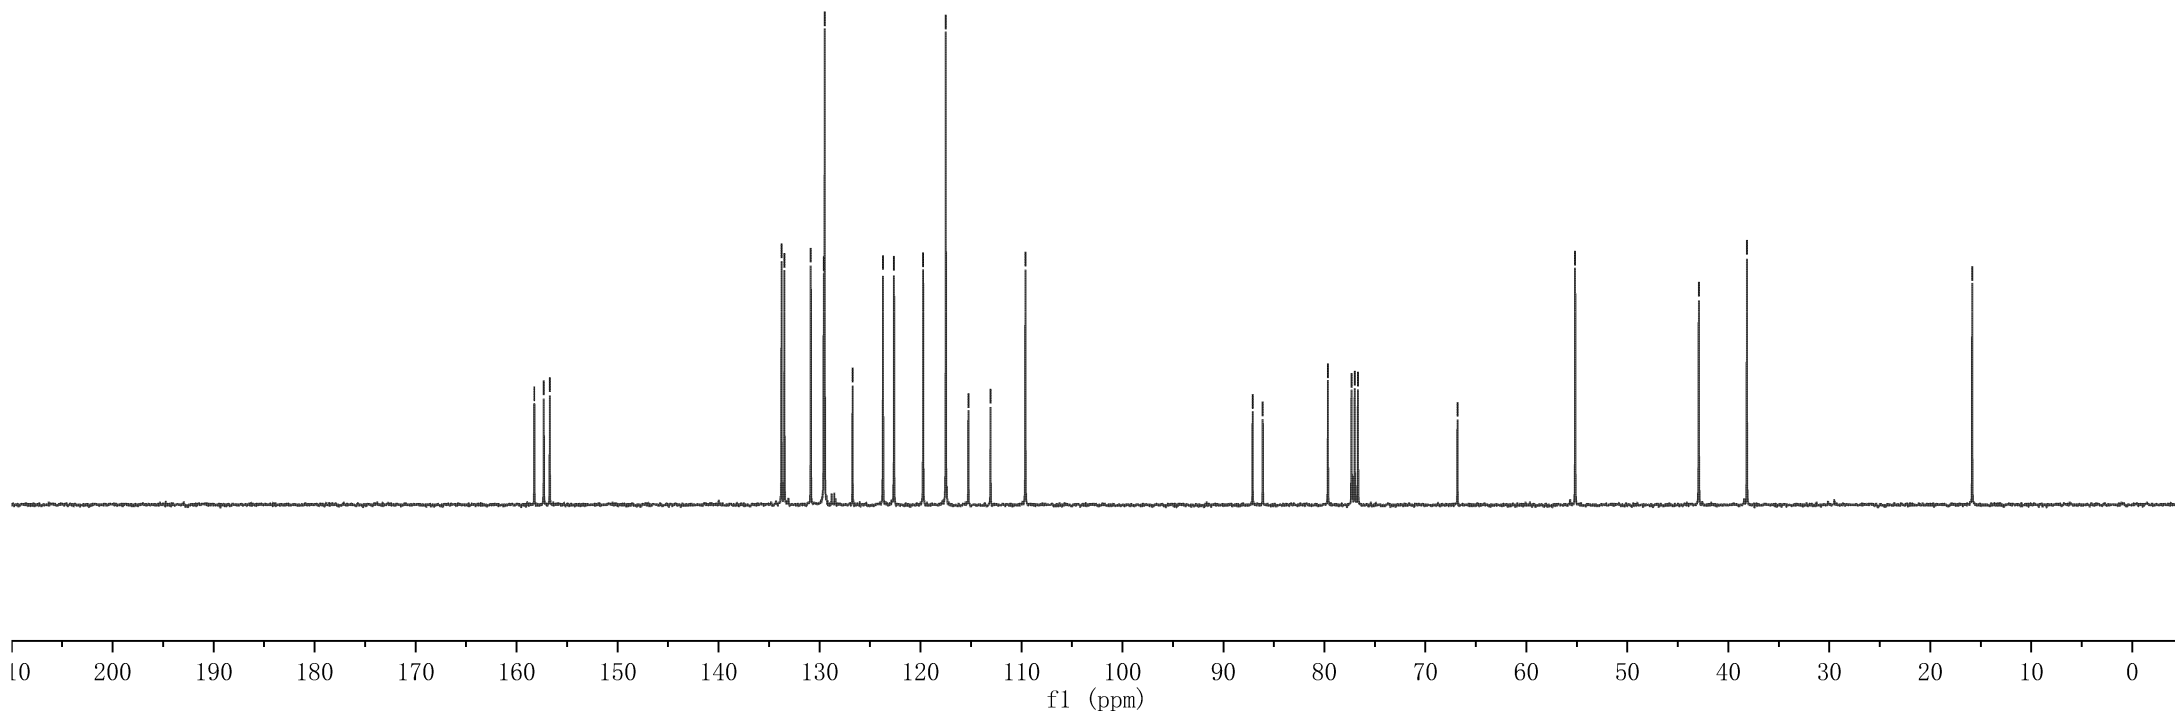

| Parameter                | Value               |
|--------------------------|---------------------|
| 1 Title                  | LFS-2-170-H         |
| 2 Origin                 | Bruker BioSpin GmbH |
| 3 Solvent                | CDC13               |
| 4 Temperature            | 298.0               |
| 5 Number of Scans        | 15                  |
| 6 Acquisition Time       | 4.0894              |
| 7 Acquisition Date       | 2022-04-17T17:41:40 |
| 8 Spectrometer Frequency | 400.13              |
| 9 Spectral Width         | 8012.8              |

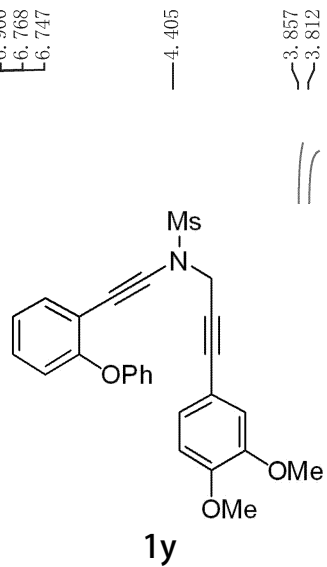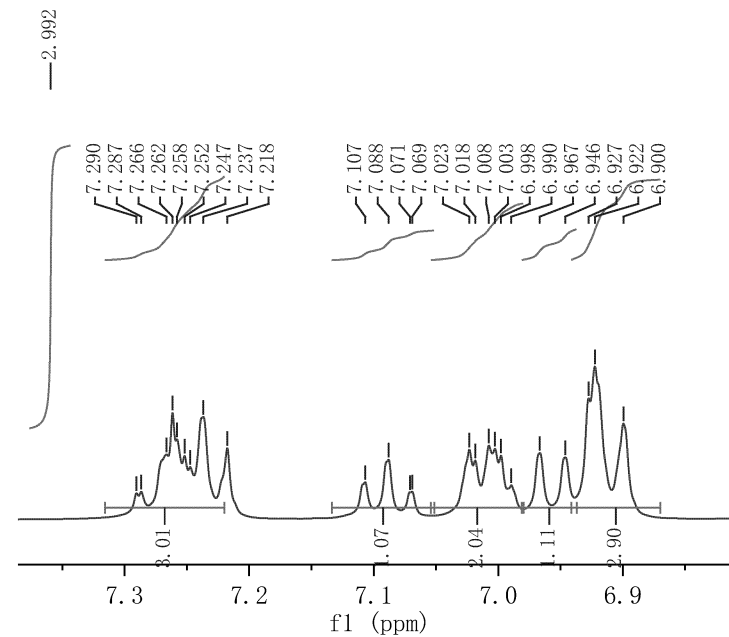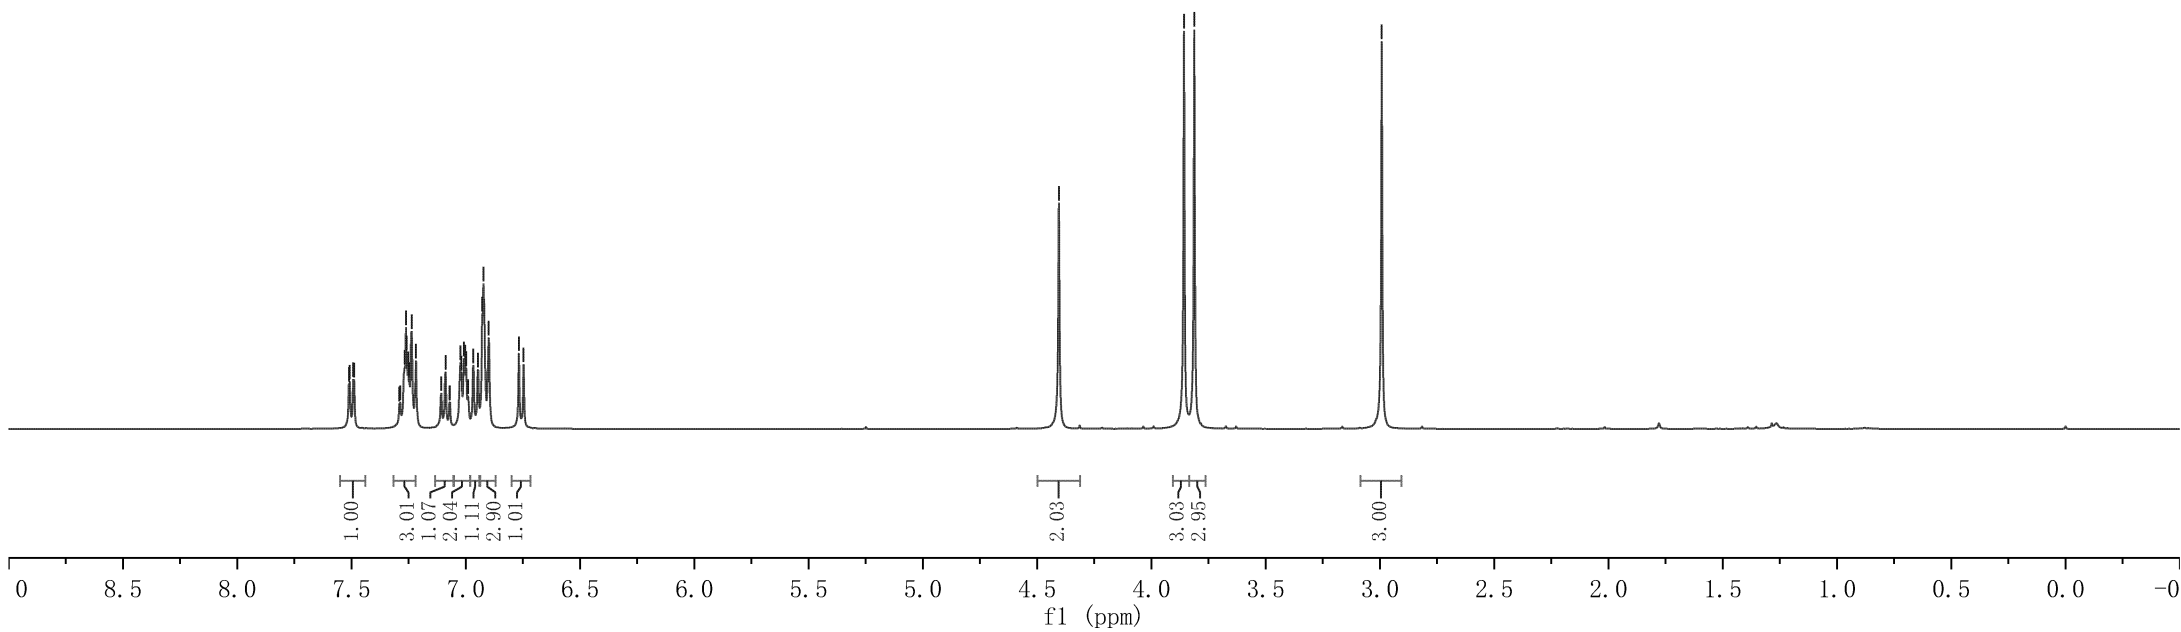

| Parameter                | Value               |
|--------------------------|---------------------|
| 1 Title                  | LFS-2-170-C         |
| 2 Origin                 | Bruker BioSpin GmbH |
| 3 Solvent                | CDC13               |
| 4 Temperature            | 300.0               |
| 5 Number of Scans        | 33                  |
| 6 Acquisition Time       | 1.3631              |
| 7 Acquisition Date       | 2022-04-17T17:44:47 |
| 8 Spectrometer Frequency | 100.61              |
| 9 Spectral Width         | 24038.5             |

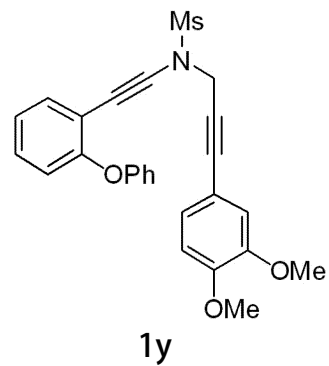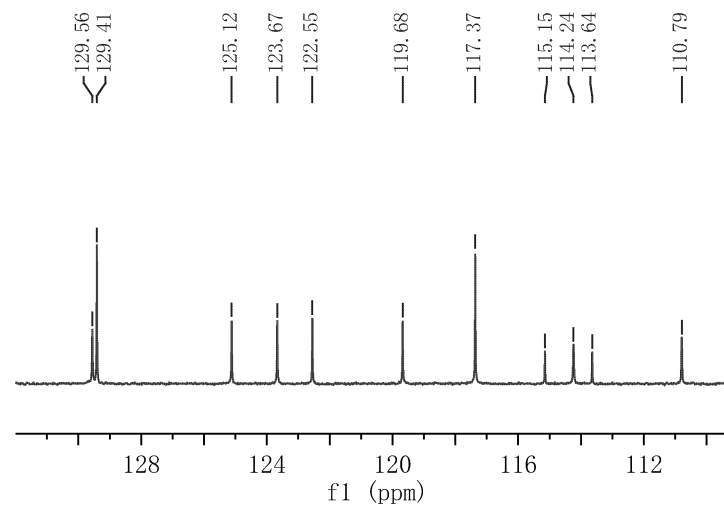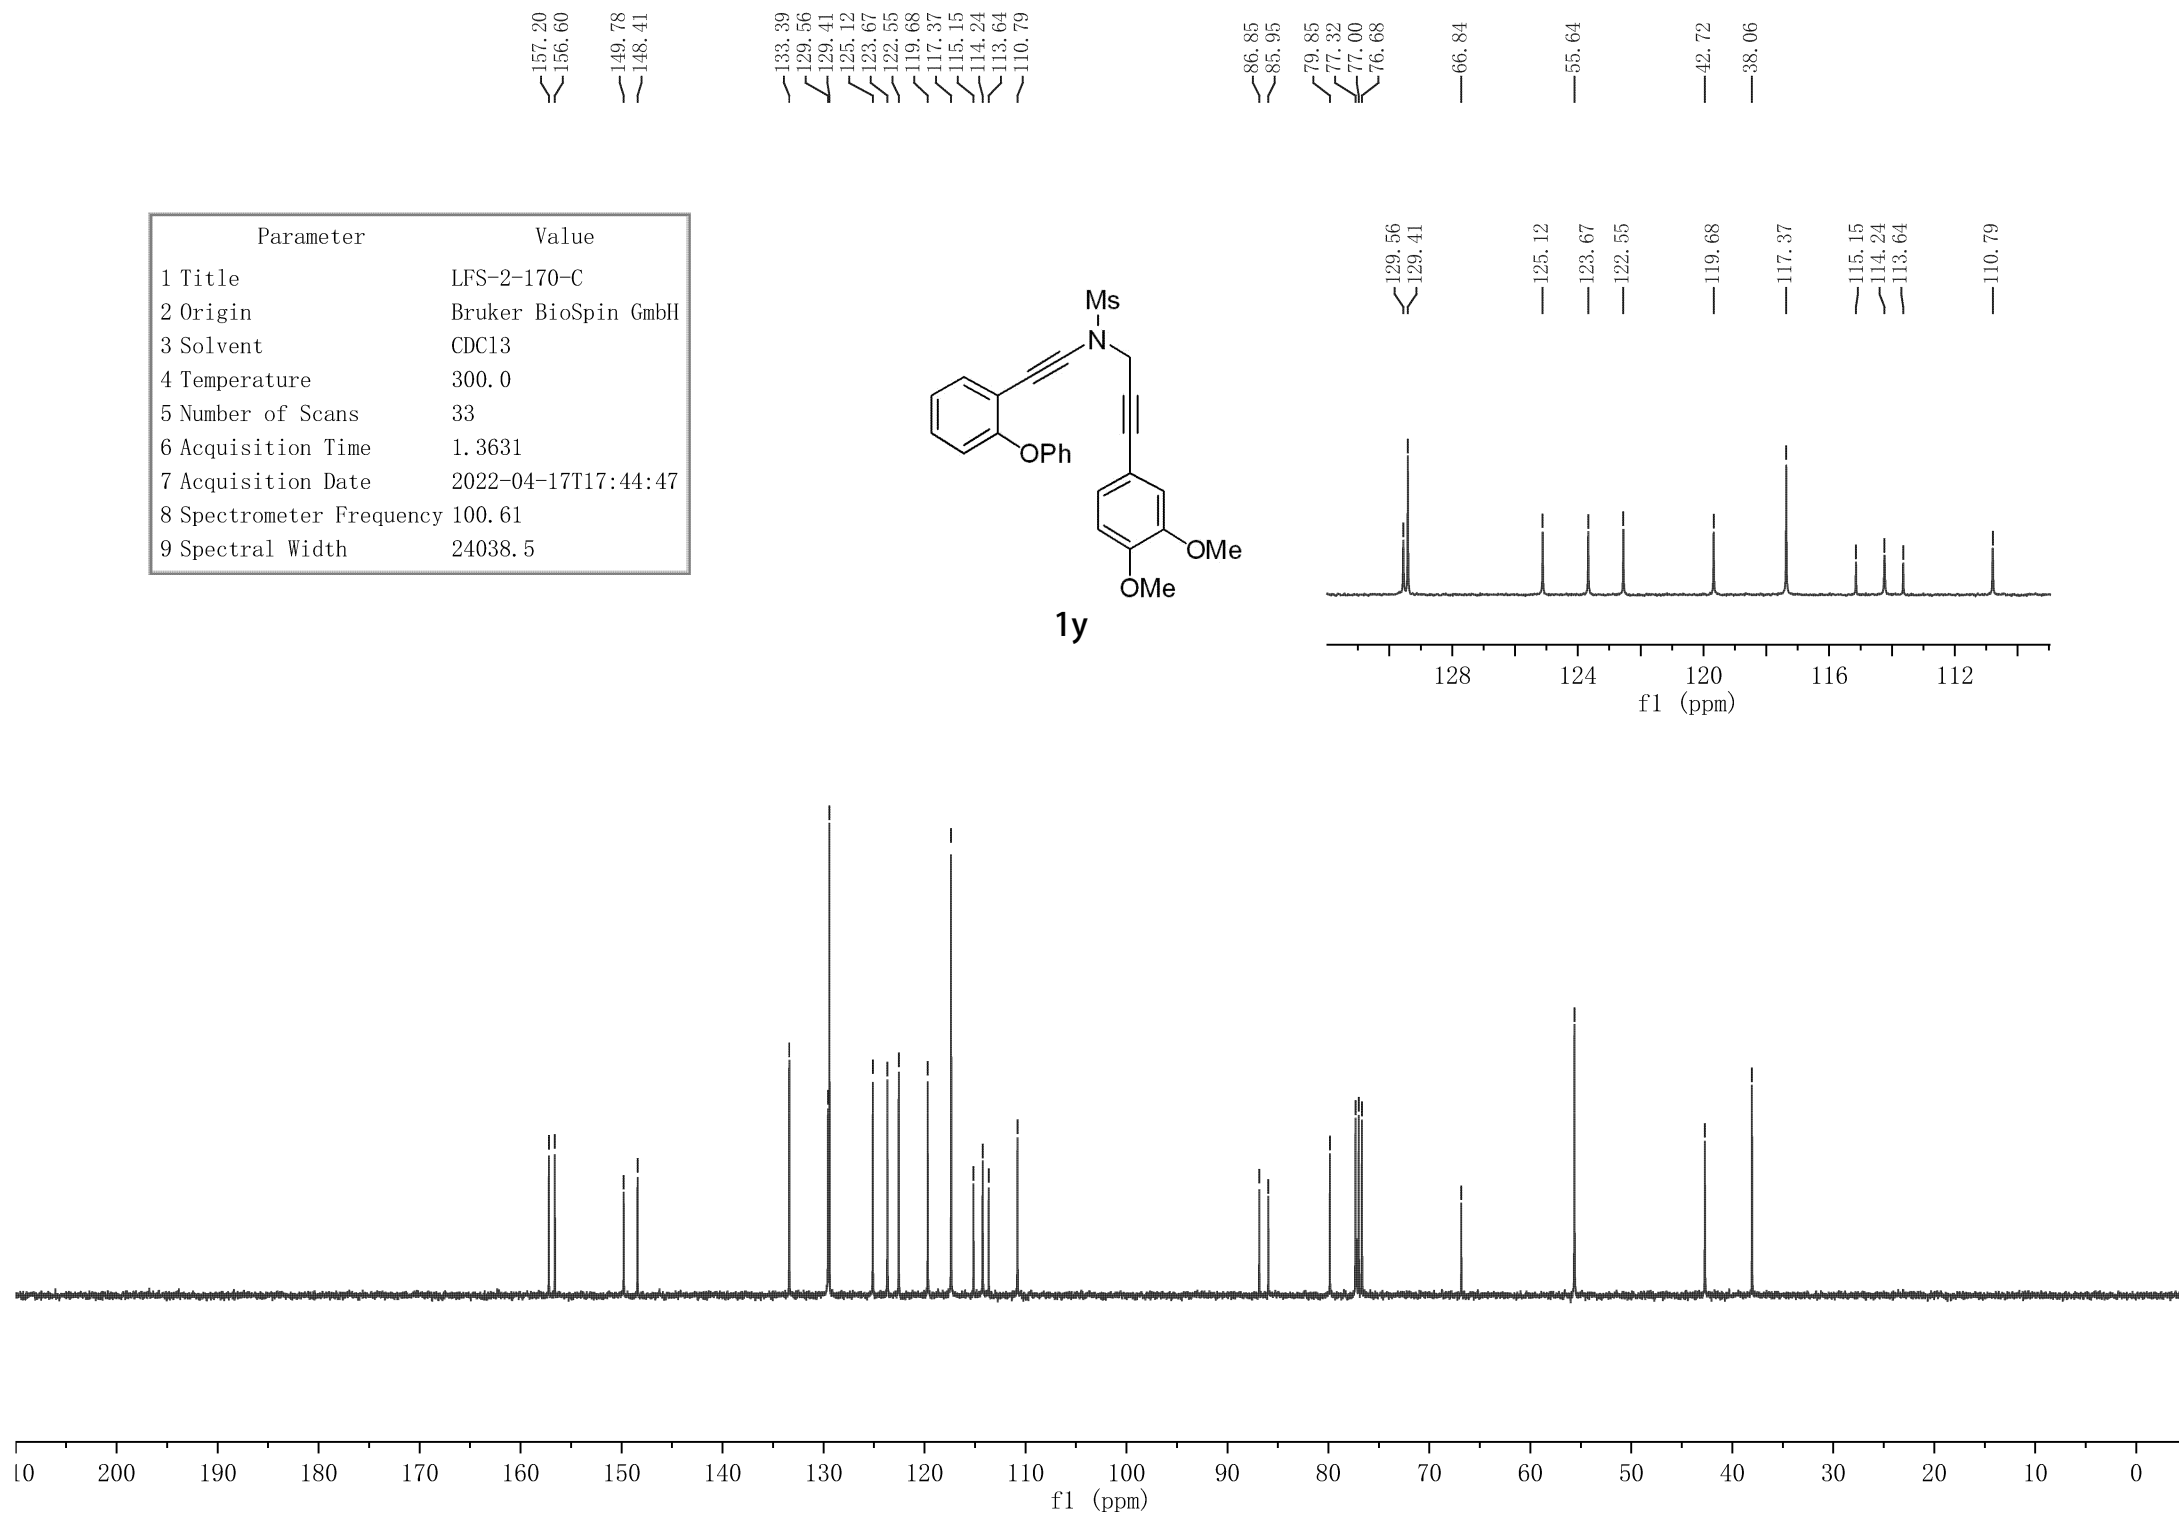

| Parameter                | Value               |
|--------------------------|---------------------|
| 1 Title                  | zjj-14-32-H         |
| 2 Origin                 | Bruker BioSpin GmbH |
| 3 Solvent                | CDC13               |
| 4 Temperature            | 298.0               |
| 5 Number of Scans        | 6                   |
| 6 Acquisition Time       | 4.0894              |
| 7 Acquisition Date       | 2022-04-14T19:46:26 |
| 8 Spectrometer Frequency | 400.13              |
| 9 Spectral Width         | 8012.8              |

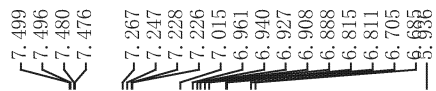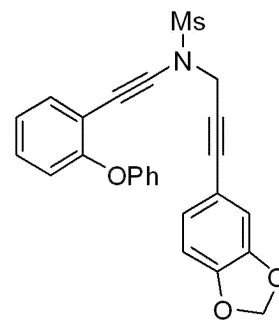

**1z**

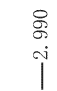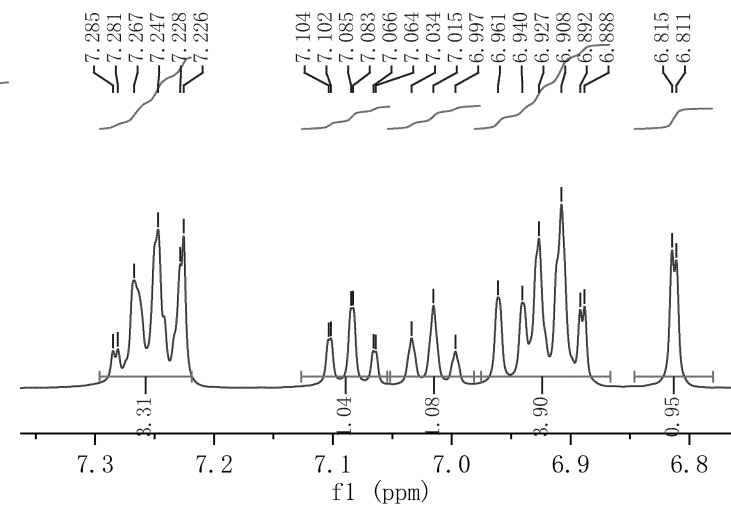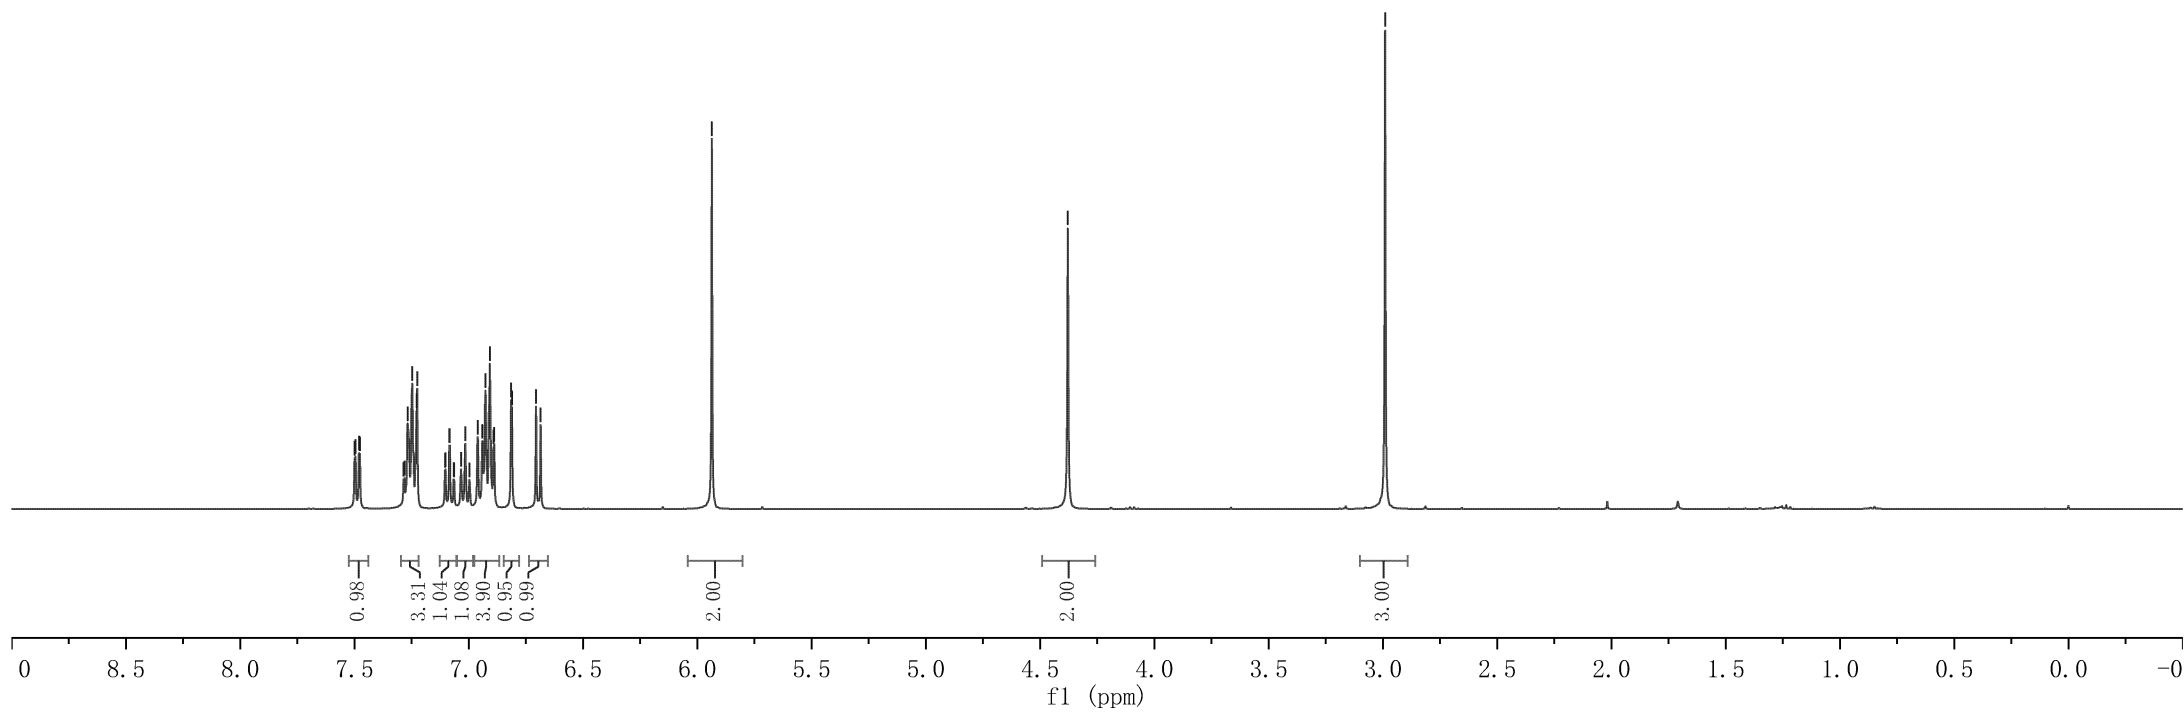

| Parameter                | Value               |
|--------------------------|---------------------|
| 1 Title                  | zjj-14-32-C         |
| 2 Origin                 | Bruker BioSpin GmbH |
| 3 Solvent                | CDC13               |
| 4 Temperature            | 300.0               |
| 5 Number of Scans        | 9                   |
| 6 Acquisition Time       | 1.3631              |
| 7 Acquisition Date       | 2022-04-14T19:47:35 |
| 8 Spectrometer Frequency | 100.61              |
| 9 Spectral Width         | 24038.5             |

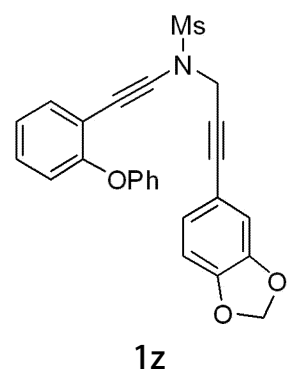

157.28  
136.75  
148.28  
147.30  
133.47  
129.64  
129.51  
126.49  
123.71  
122.67  
119.71  
117.50  
115.16  
114.71  
111.51  
108.31  
101.31  
86.66  
85.91  
79.78  
77.32  
77.00  
76.68  
66.91  
42.75  
38.14

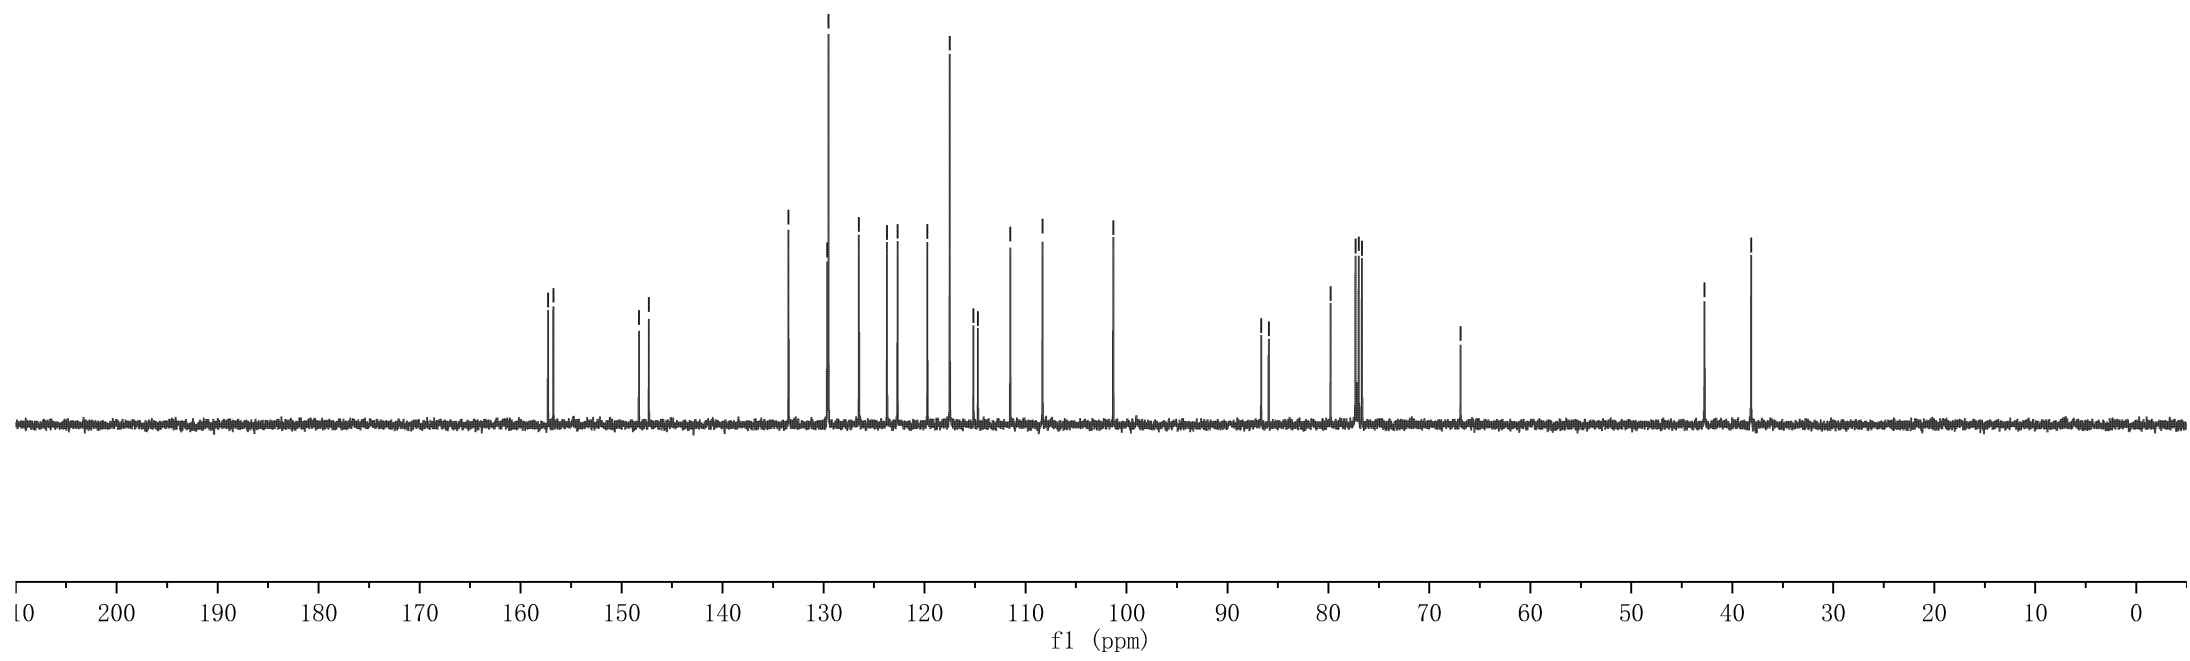



| Parameter                | Value               |
|--------------------------|---------------------|
| 1 Title                  | zjj-14-32-C-dept    |
| 2 Origin                 | Bruker BioSpin GmbH |
| 3 Solvent                | CDC13               |
| 4 Temperature            | 300.0               |
| 5 Number of Scans        | 12                  |
| 6 Acquisition Time       | 1.3631              |
| 7 Acquisition Date       | 2022-04-14T19:49:03 |
| 8 Spectrometer Frequency | 100.61              |
| 9 Spectral Width         | 24038.5             |

133.71  
129.88  
129.76  
126.73  
123.95  
122.91  
119.96  
117.74

111.75  
108.55

101.55

42.99

38.38

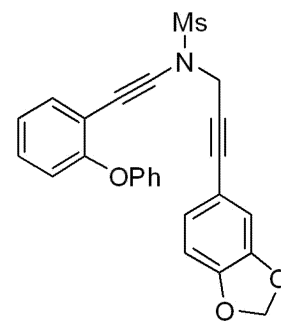

**1z**

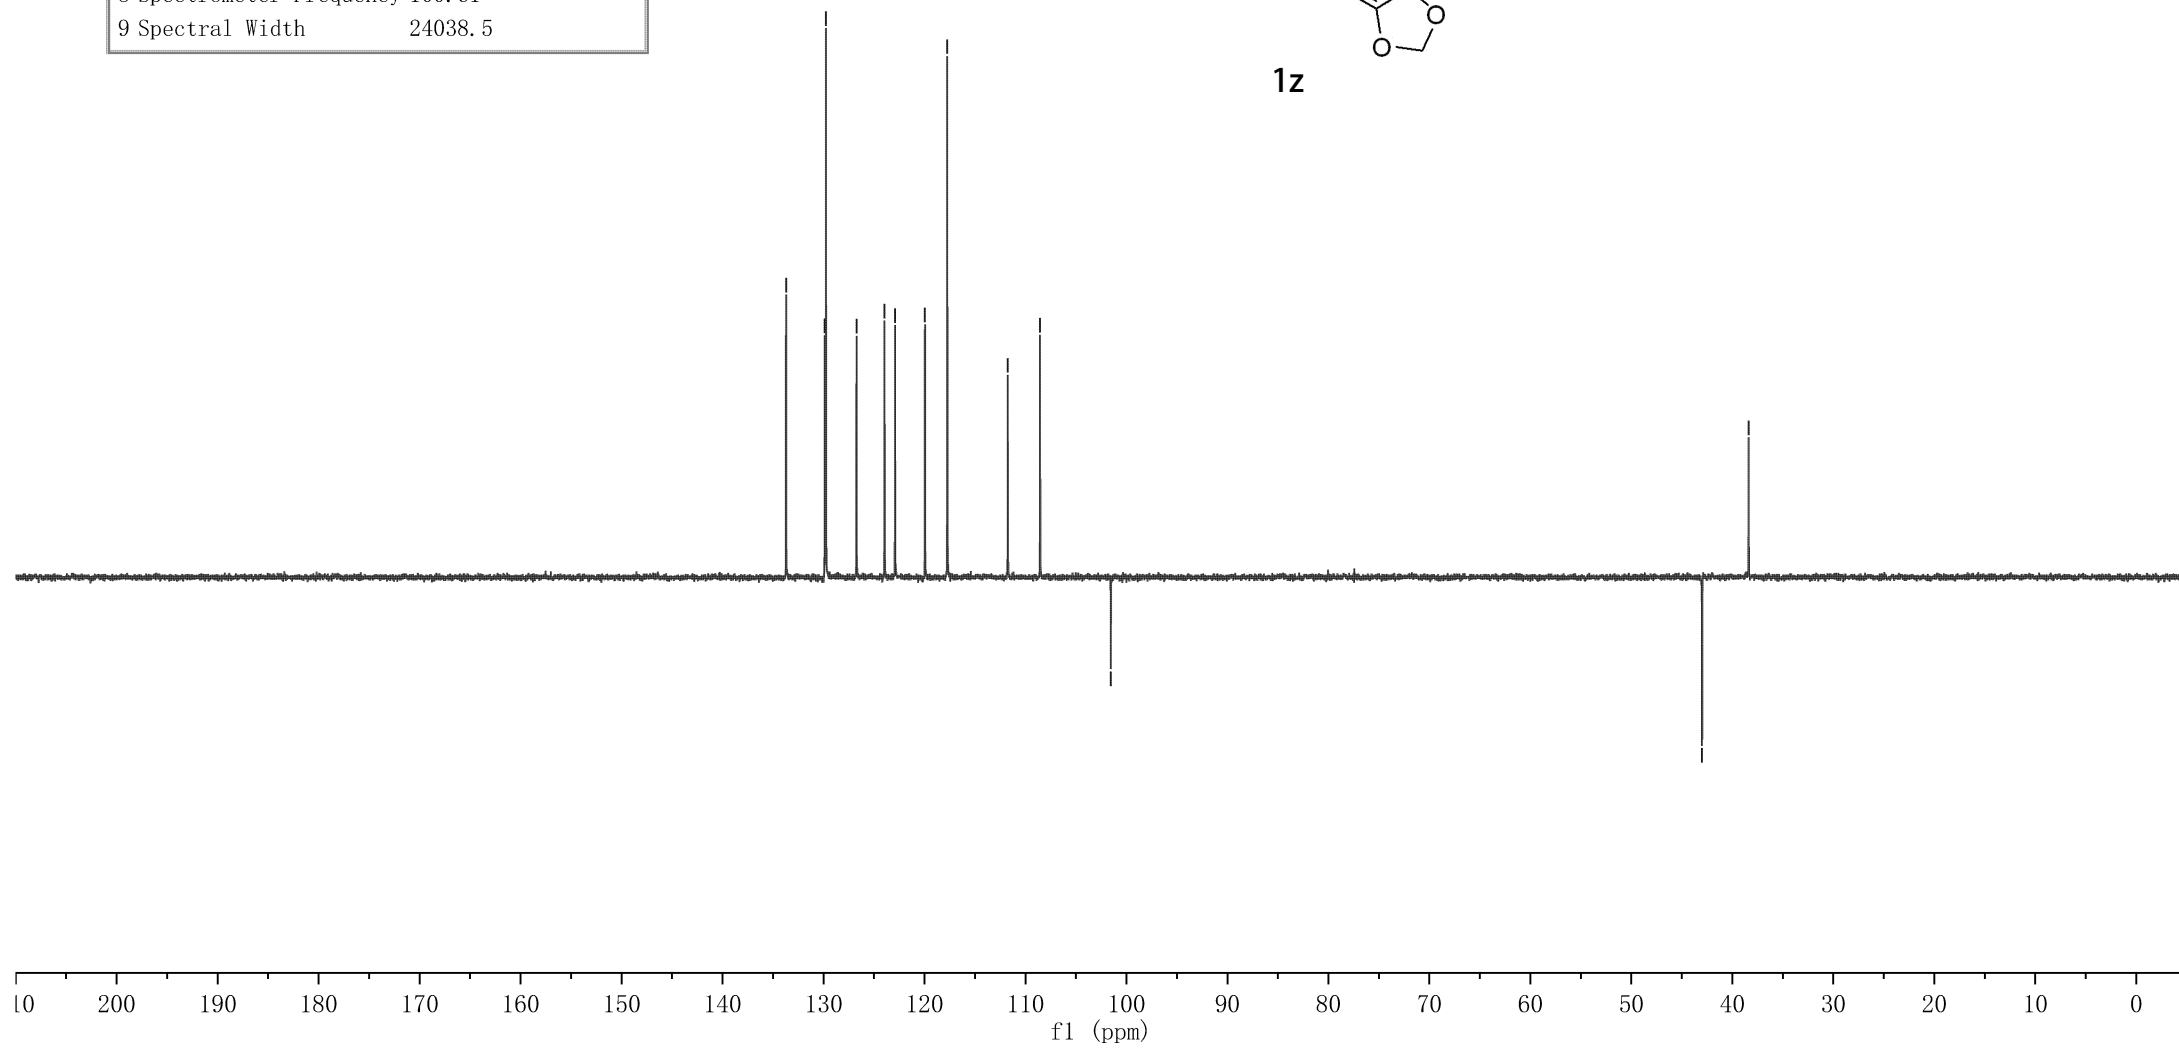

7.926  
7.822  
7.814  
7.799  
7.762  
7.741  
7.536  
7.532  
7.516  
7.512  
7.506  
7.502  
7.498  
7.495  
7.488  
7.488  
7.431  
7.428  
7.410  
7.407  
7.288  
7.285  
7.269  
7.237  
7.219  
7.216  
7.198  
7.124  
7.107  
7.105  
7.006  
6.988  
6.982  
6.980  
6.961  
6.959  
6.931  
6.929  
6.910  
6.910

| Parameter                | Value               |
|--------------------------|---------------------|
| 1 Title                  | zjj-14-37-H         |
| 2 Origin                 | Bruker BioSpin GmbH |
| 3 Solvent                | CDCl3               |
| 4 Temperature            | 298.0               |
| 5 Number of Scans        | 7                   |
| 6 Acquisition Time       | 4.0894              |
| 7 Acquisition Date       | 2022-04-16T21:01:29 |
| 8 Spectrometer Frequency | 400.13              |
| 9 Spectral Width         | 8012.8              |

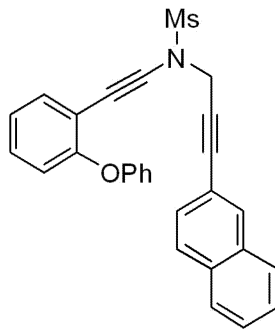

1aa

3.044

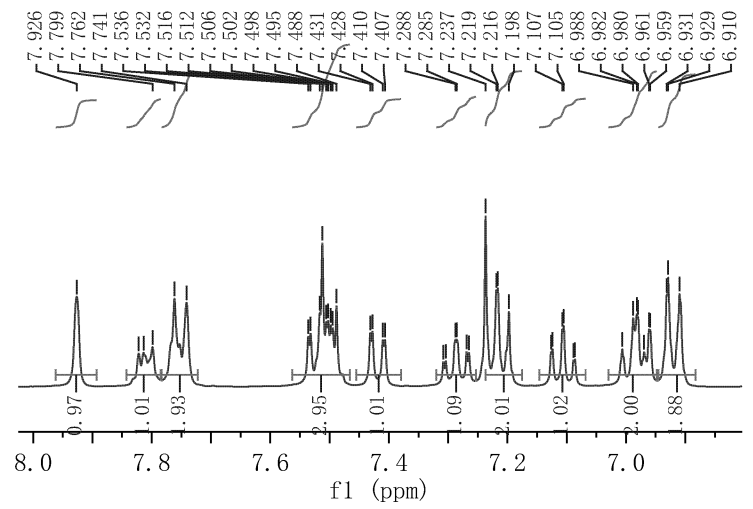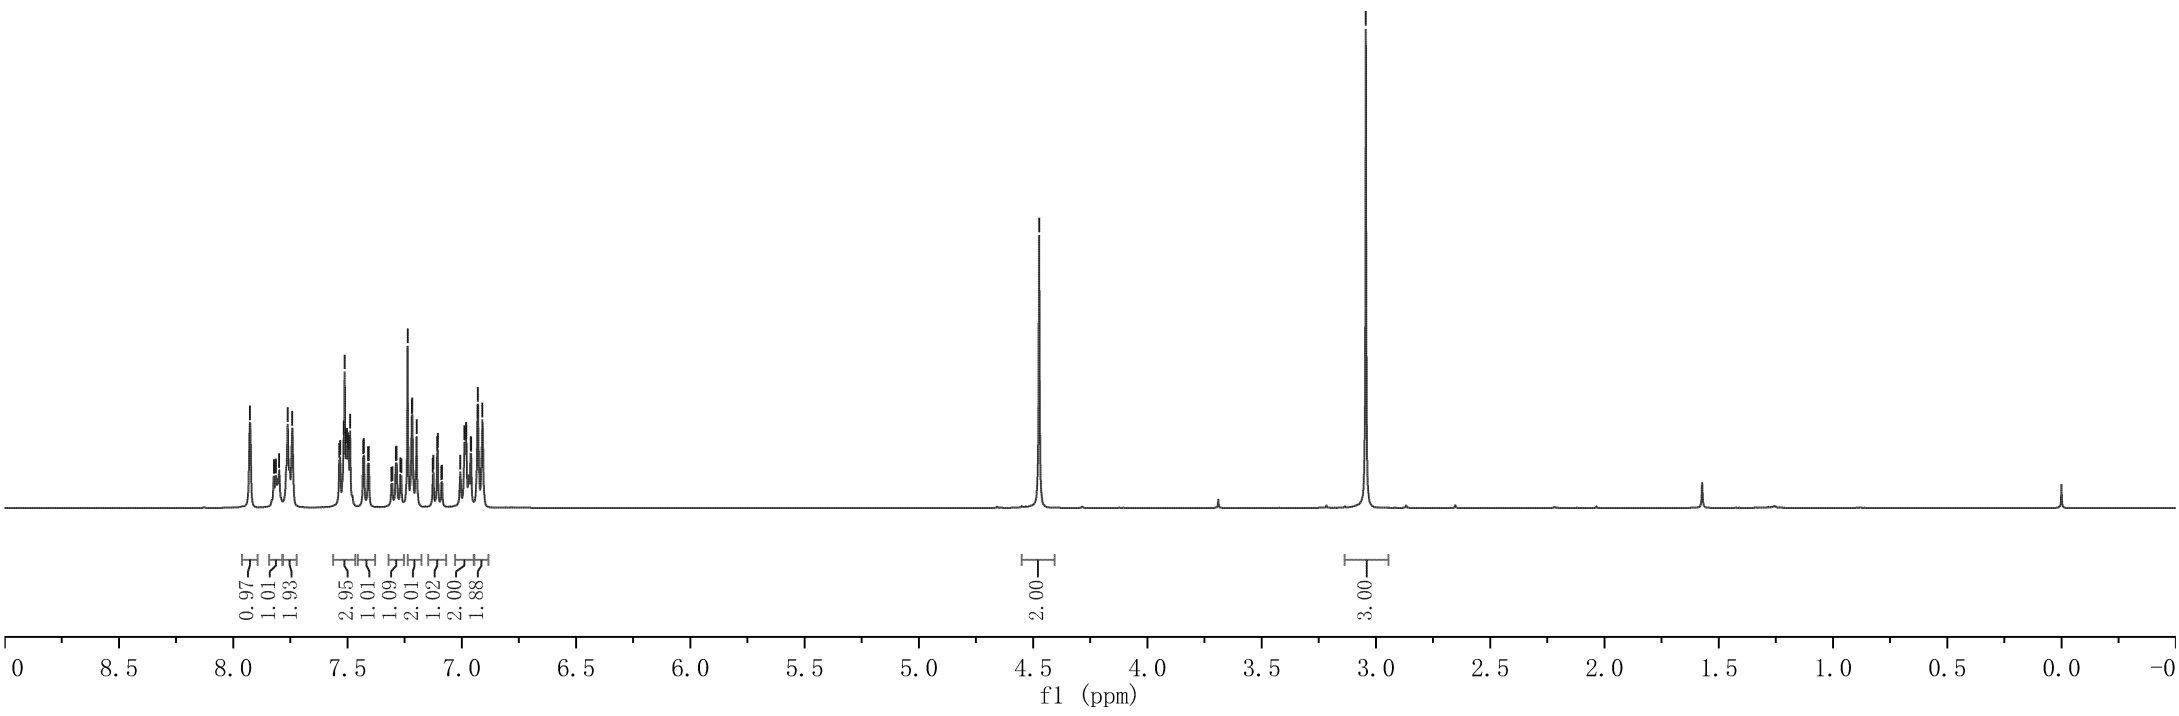

| Parameter                | Value               |
|--------------------------|---------------------|
| 1 Title                  | zjj-14-37-C         |
| 2 Origin                 | Bruker BioSpin GmbH |
| 3 Solvent                | CDC13               |
| 4 Temperature            | 300.0               |
| 5 Number of Scans        | 34                  |
| 6 Acquisition Time       | 1.3631              |
| 7 Acquisition Date       | 2022-04-16T21:03:19 |
| 8 Spectrometer Frequency | 100.61              |
| 9 Spectral Width         | 24038.5             |

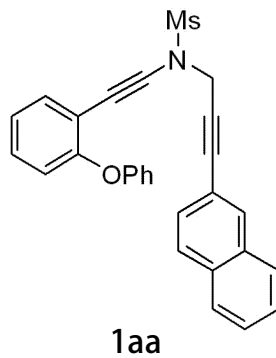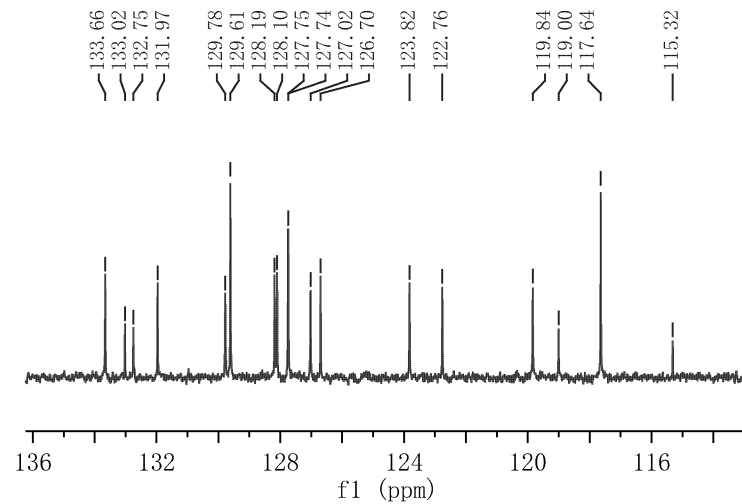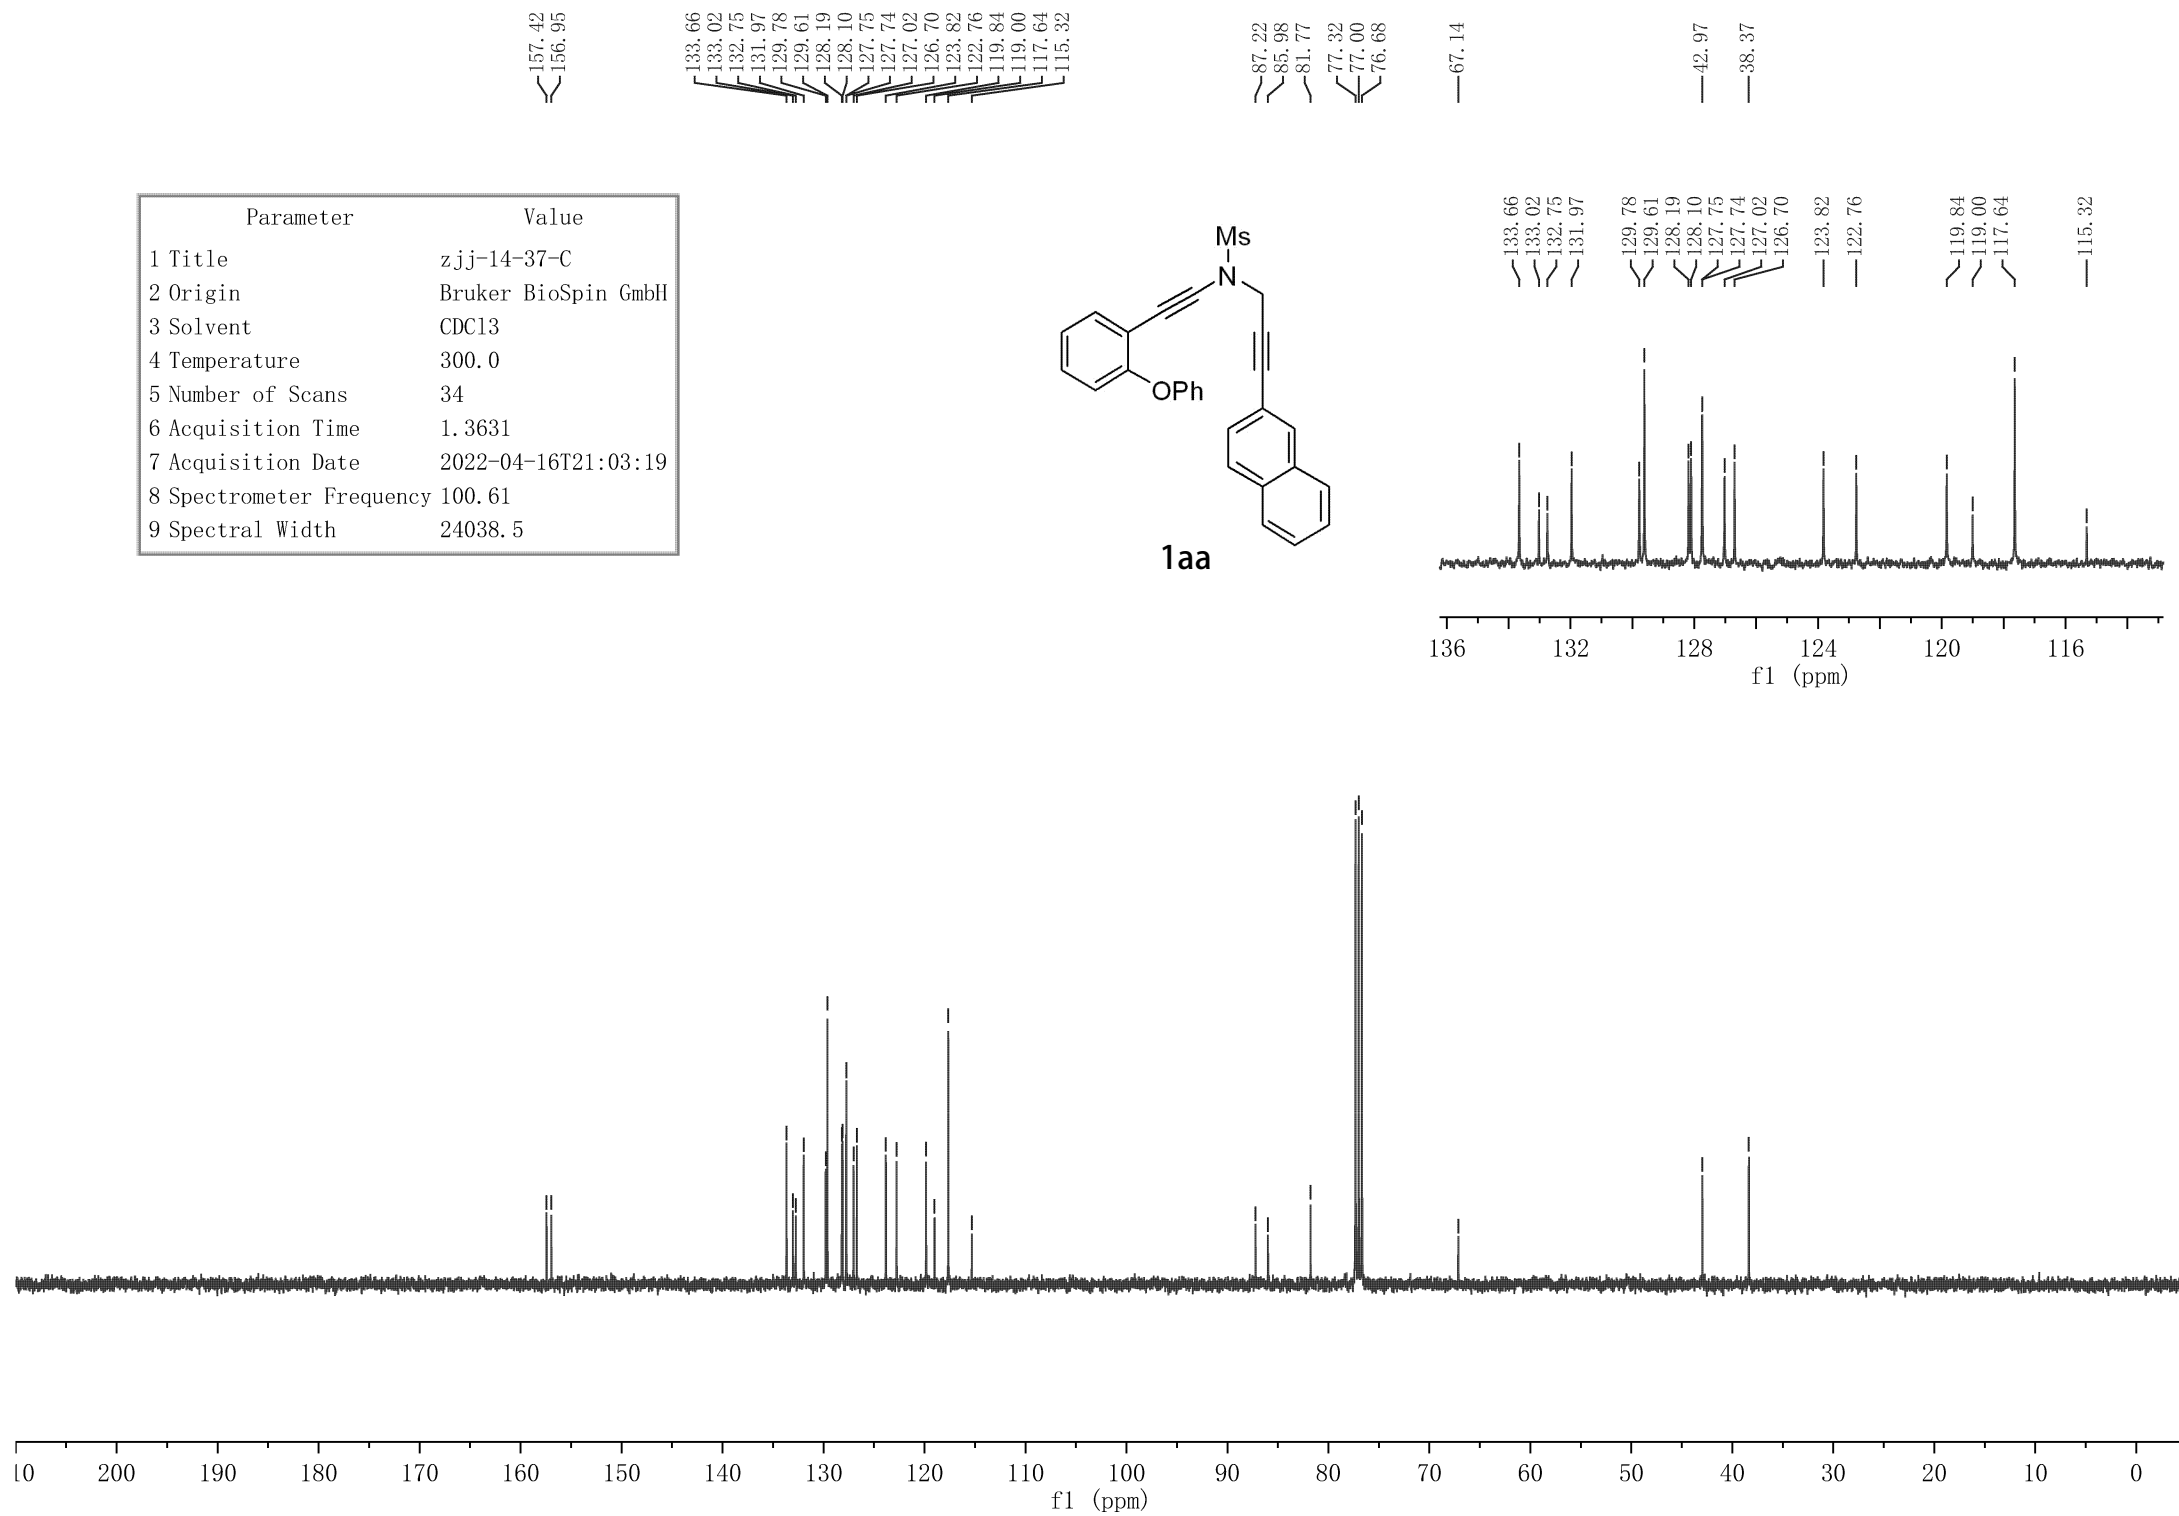

7.493  
7.489  
7.474  
7.470  
7.382  
7.377  
7.375  
7.275  
7.271  
7.255  
7.250  
7.231  
7.229  
7.218  
7.213  
7.210  
7.206  
7.202  
7.095  
7.093  
7.076  
7.074  
7.058  
7.055  
7.037  
7.035  
7.022  
7.002  
6.983  
6.956  
6.937  
6.936  
6.910  
6.890

| Parameter                | Value               |
|--------------------------|---------------------|
| 1 Title                  | LFS-2-174-H         |
| 2 Origin                 | Bruker BioSpin GmbH |
| 3 Solvent                | CDCl3               |
| 4 Temperature            | 298.0               |
| 5 Number of Scans        | 10                  |
| 6 Acquisition Time       | 4.0894              |
| 7 Acquisition Date       | 2022-04-18T22:07:14 |
| 8 Spectrometer Frequency | 400.13              |
| 9 Spectral Width         | 8012.8              |

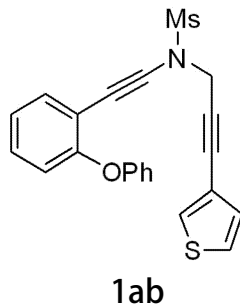

4.371

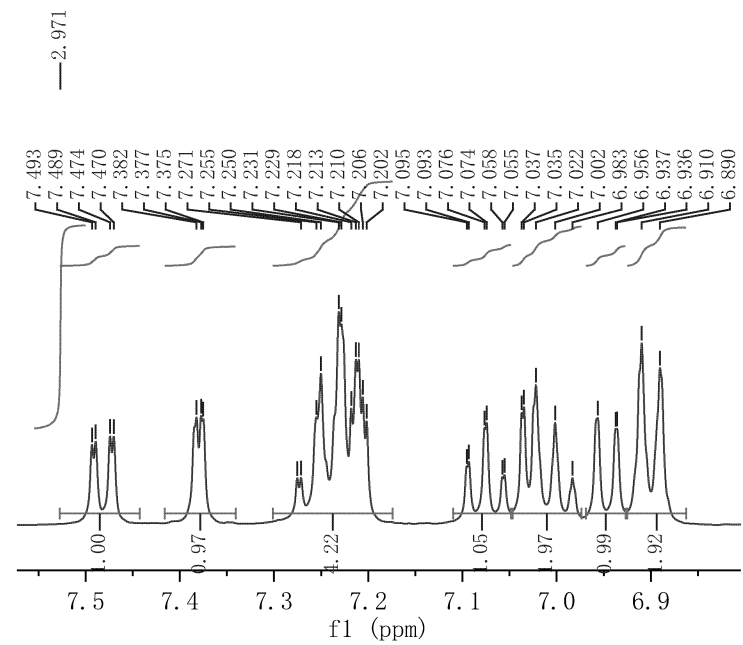

2.971

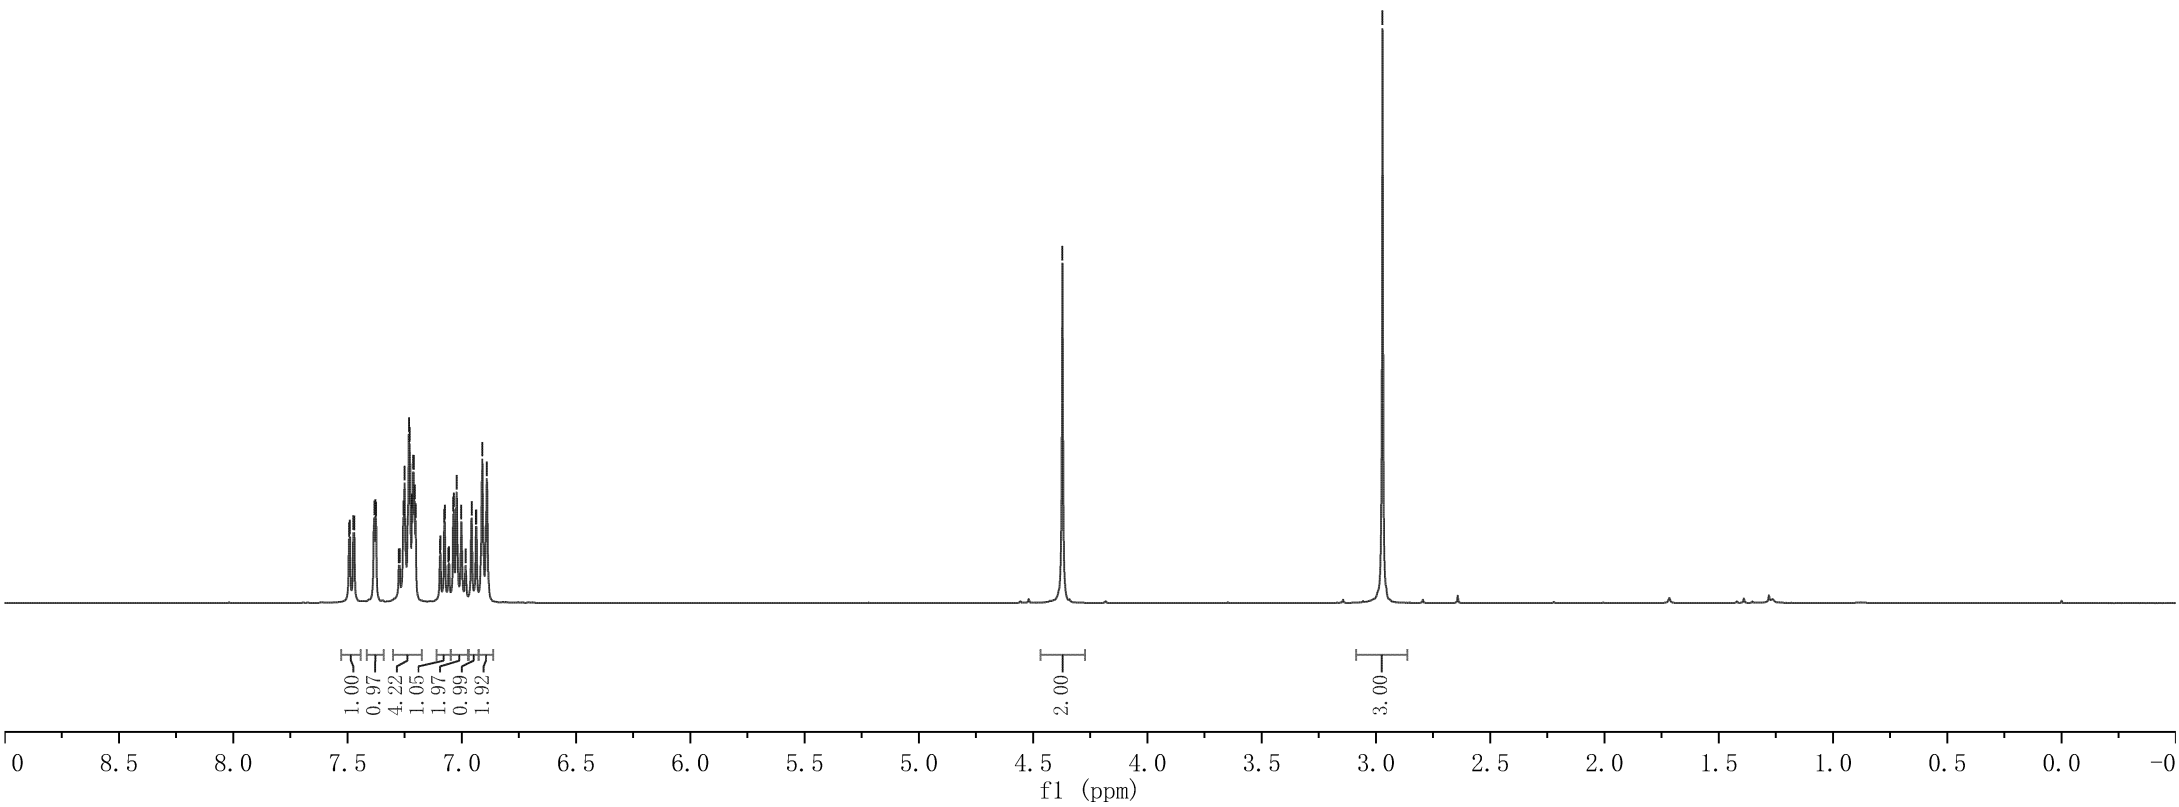

| Parameter                | Value               |
|--------------------------|---------------------|
| 1 Title                  | LFS-2-174-C         |
| 2 Origin                 | Bruker BioSpin GmbH |
| 3 Solvent                | CDC13               |
| 4 Temperature            | 300.0               |
| 5 Number of Scans        | 22                  |
| 6 Acquisition Time       | 1.3631              |
| 7 Acquisition Date       | 2022-04-18T22:08:44 |
| 8 Spectrometer Frequency | 100.61              |
| 9 Spectral Width         | 24038.5             |

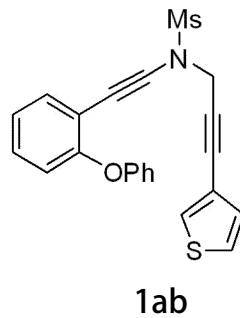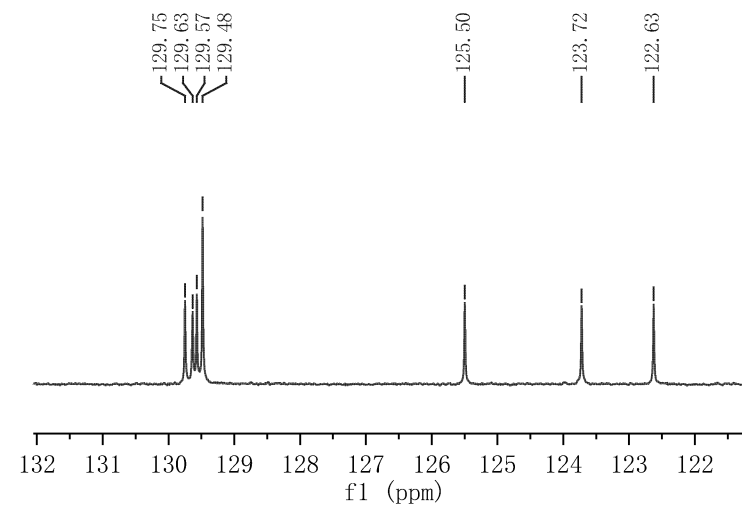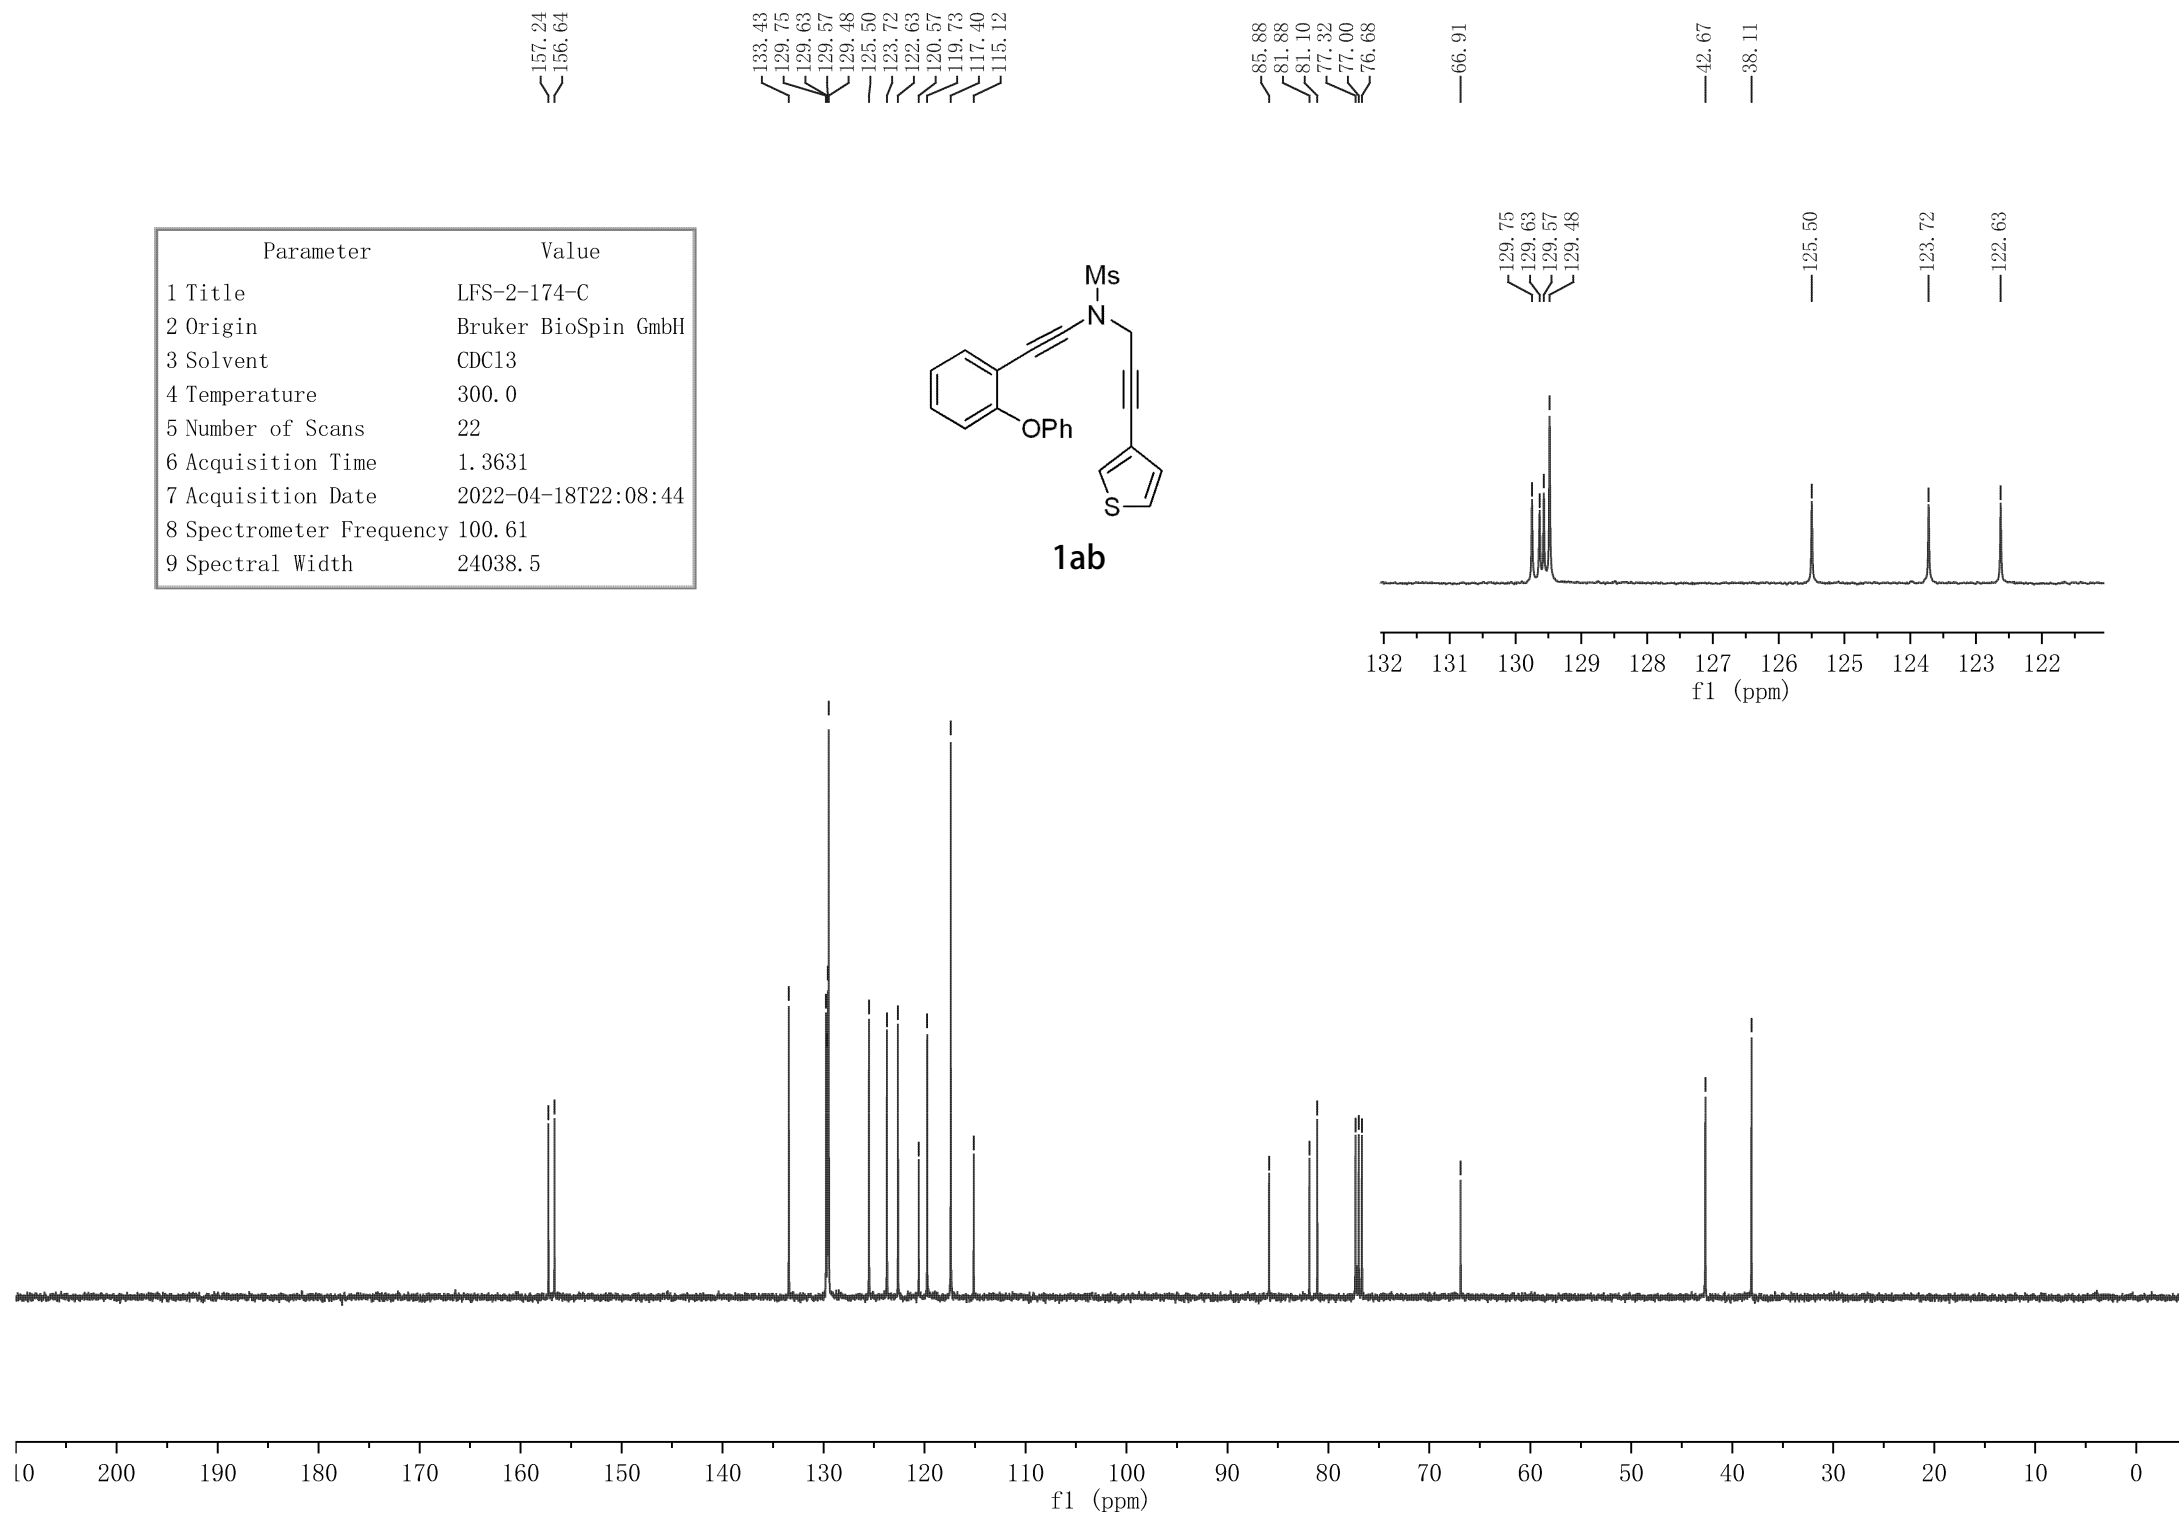

7.488  
7.484  
7.469  
7.465  
7.322  
7.300  
7.254  
7.250  
7.233  
7.231  
7.223  
7.214  
7.210  
7.062  
7.043  
7.027  
7.025  
6.904  
6.903  
6.884  
6.882  
6.848  
6.827  
6.795  
6.773

| Parameter                | Value               |
|--------------------------|---------------------|
| 1 Title                  | LFS-2-195-H         |
| 2 Origin                 | Bruker BioSpin GmbH |
| 3 Solvent                | CDCl3               |
| 4 Temperature            | 298.0               |
| 5 Number of Scans        | 12                  |
| 6 Acquisition Time       | 4.0894              |
| 7 Acquisition Date       | 2022-04-26T09:33:33 |
| 8 Spectrometer Frequency | 400.13              |
| 9 Spectral Width         | 8012.8              |

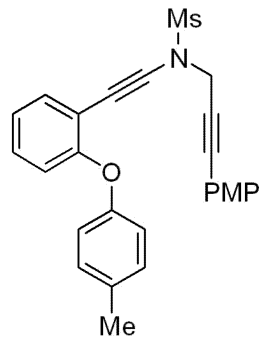

1ac

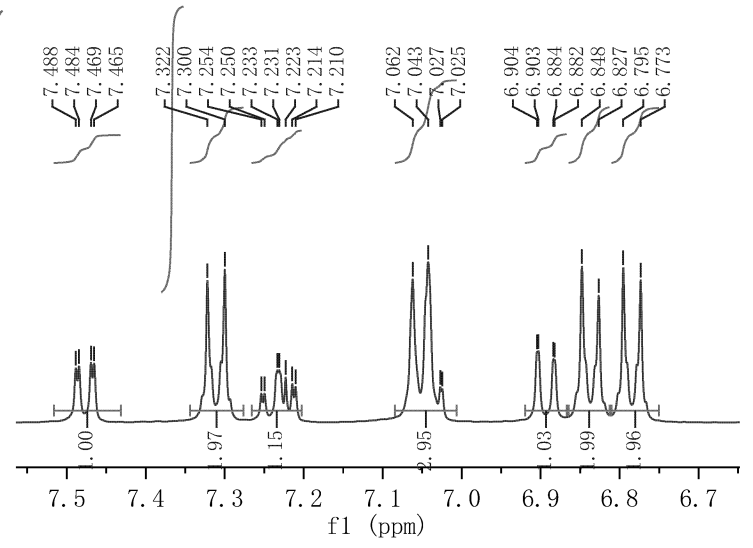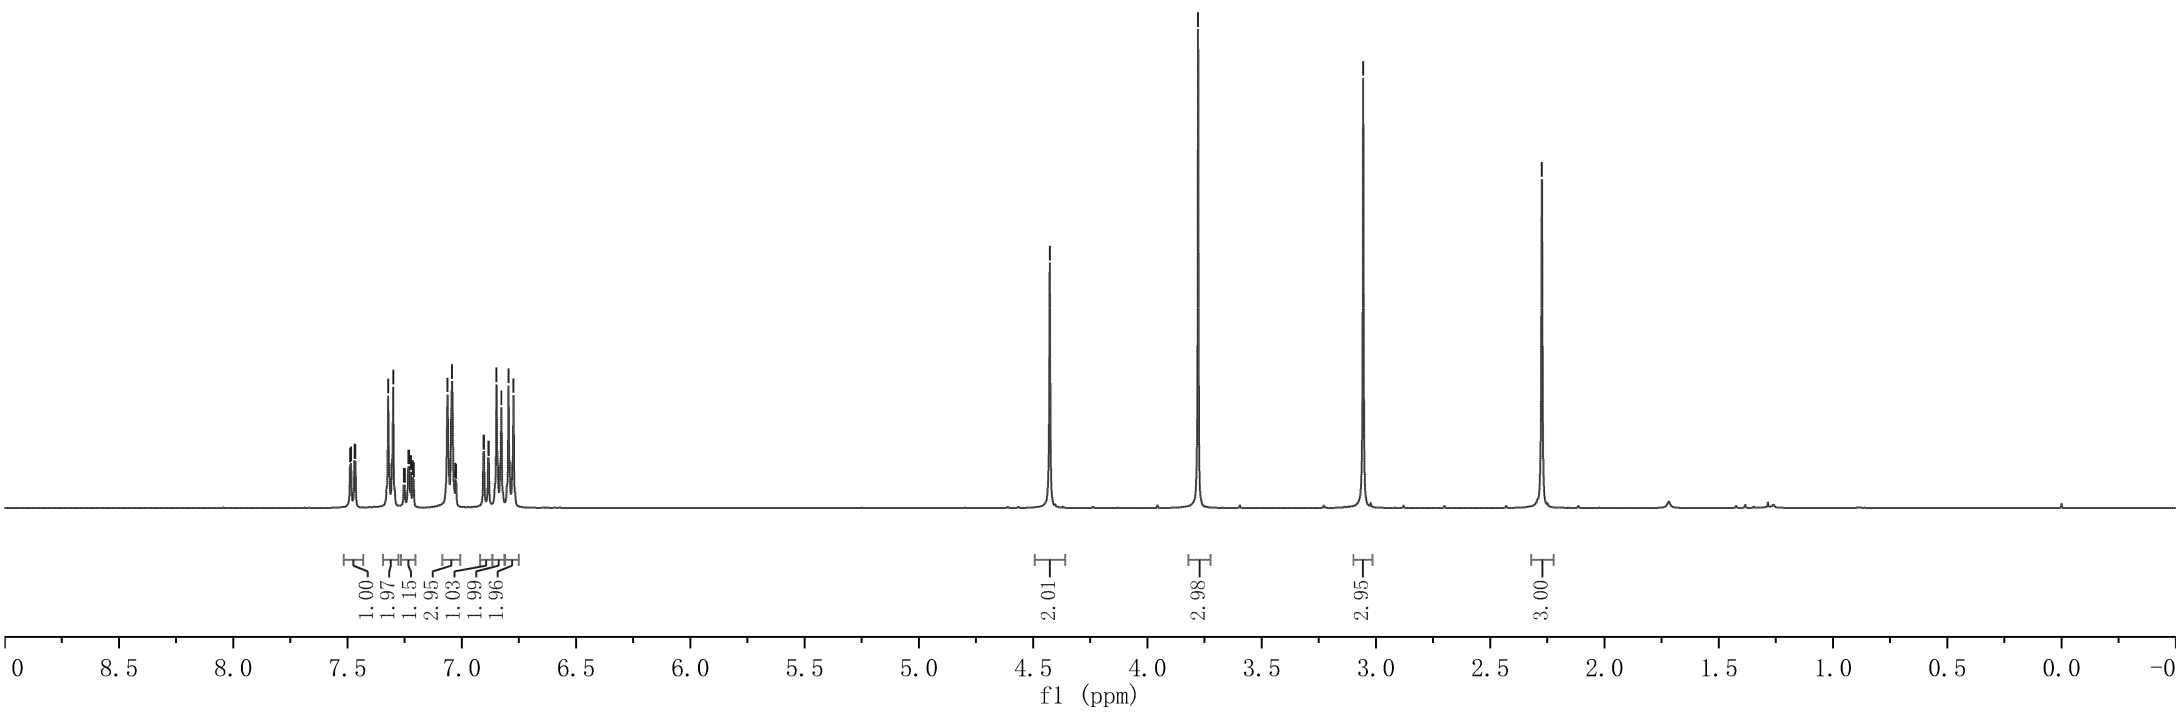

| Parameter                | Value               |
|--------------------------|---------------------|
| 1 Title                  | LFS-2-195-C         |
| 2 Origin                 | Bruker BioSpin GmbH |
| 3 Solvent                | CDC13               |
| 4 Temperature            | 300.0               |
| 5 Number of Scans        | 103                 |
| 6 Acquisition Time       | 1.3631              |
| 7 Acquisition Date       | 2022-04-26T09:35:52 |
| 8 Spectrometer Frequency | 100.61              |
| 9 Spectral Width         | 24038.5             |

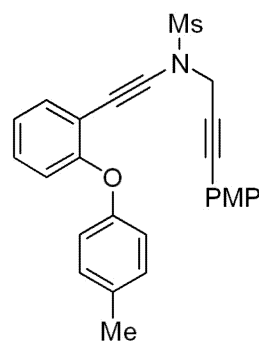

**1ac**

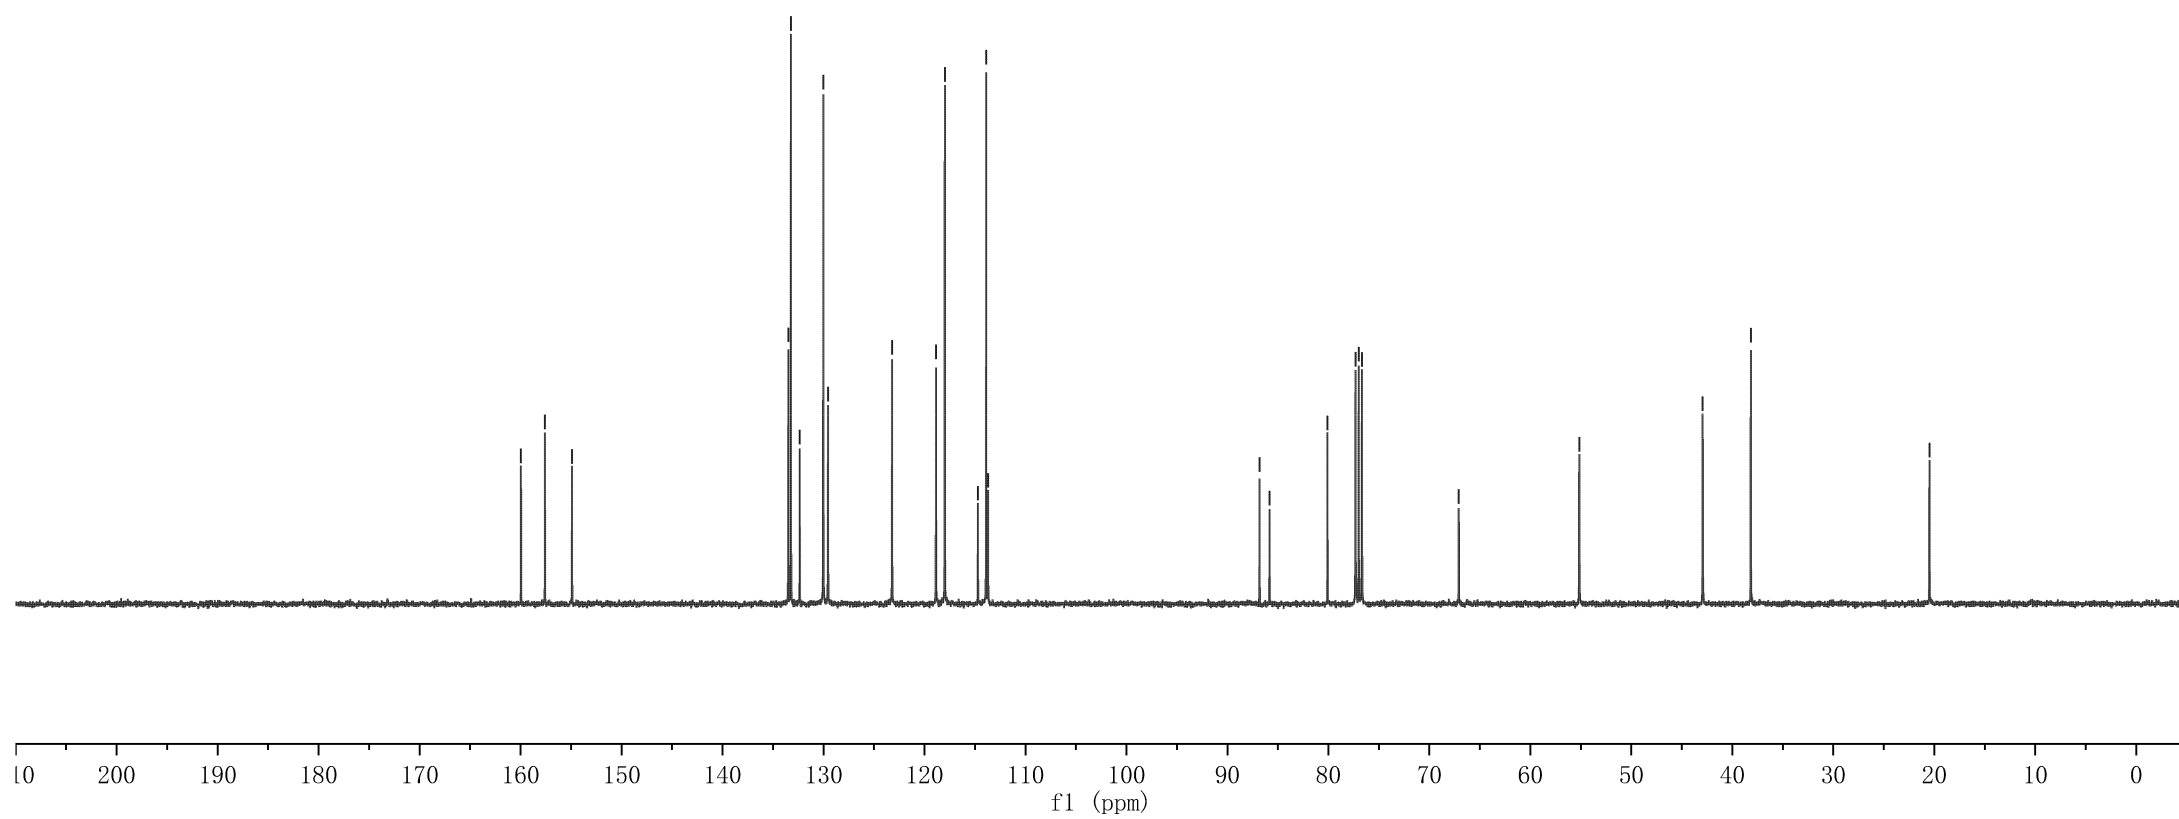

7.484  
7.480  
7.464  
7.461  
7.318  
7.296  
7.239  
7.232  
7.215  
7.196  
7.193  
7.036  
7.035  
7.017  
6.999  
6.919  
6.914  
6.902  
6.897  
6.833  
6.819  
6.813  
6.801  
6.796  
6.788  
6.766

| Parameter                | Value                  |
|--------------------------|------------------------|
| 1 Title                  | zjj-13-173-OPMP-diwu-H |
| 2 Origin                 | Bruker BioSpin GmbH    |
| 3 Solvent                | CDCl3                  |
| 4 Temperature            | 298.0                  |
| 5 Number of Scans        | 8                      |
| 6 Acquisition Time       | 4.0894                 |
| 7 Acquisition Date       | 2022-02-10T14:31:45    |
| 8 Spectrometer Frequency | 400.13                 |
| 9 Spectral Width         | 8012.8                 |

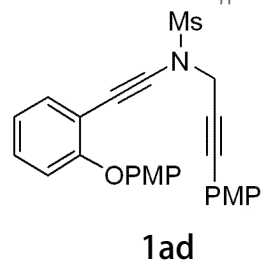

4.475  
3.779  
3.744  
3.130

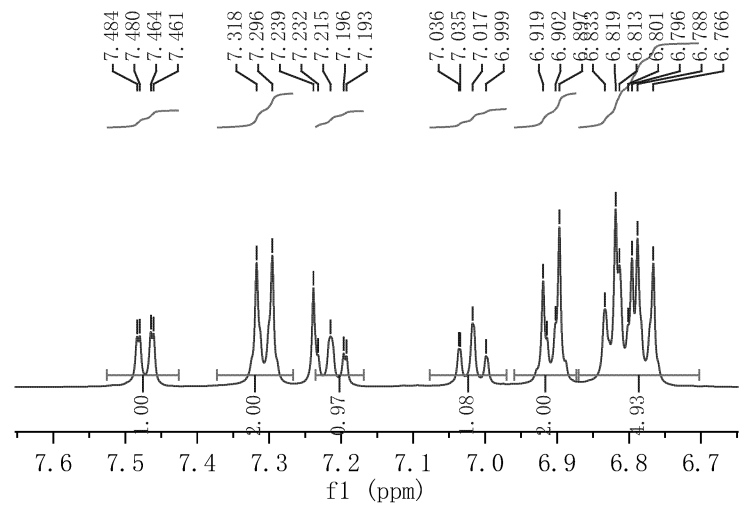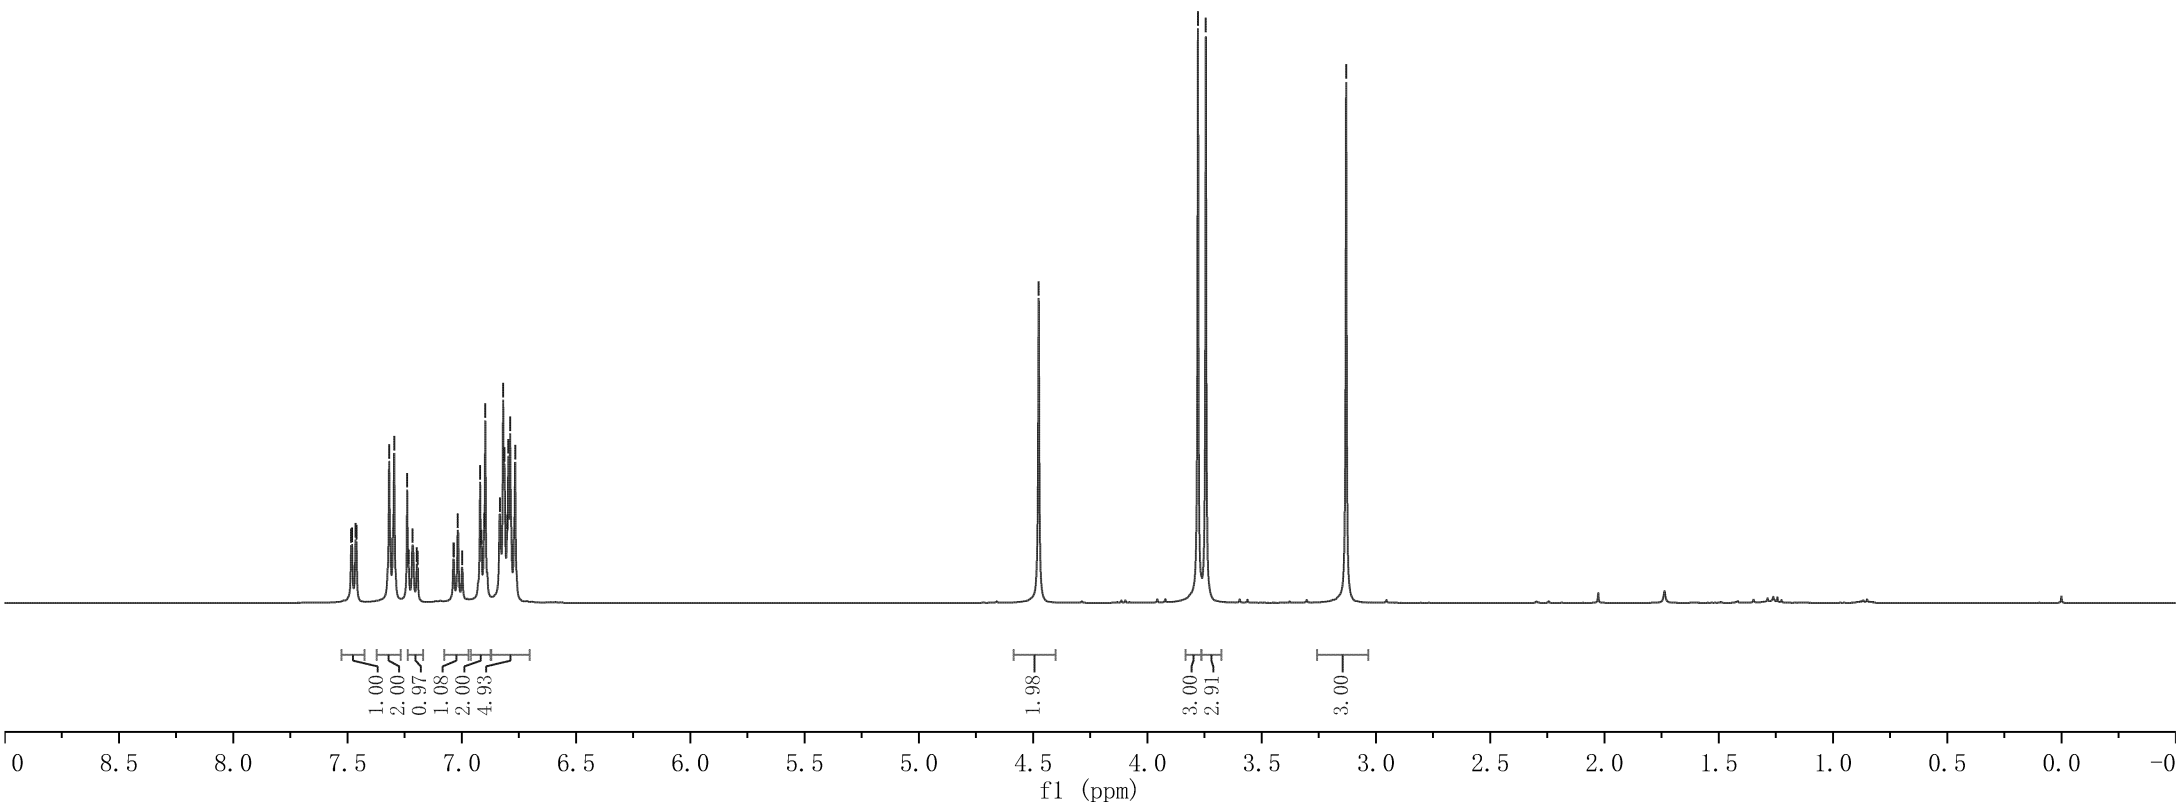



| Parameter                | Value                  |
|--------------------------|------------------------|
| 1 Title                  | zjj-13-173-OPMP-diwu-C |
| 2 Origin                 | Bruker BioSpin GmbH    |
| 3 Solvent                | CDC13                  |
| 4 Temperature            | 300.0                  |
| 5 Number of Scans        | 20                     |
| 6 Acquisition Time       | 1.3631                 |
| 7 Acquisition Date       | 2022-02-10T14:33:09    |
| 8 Spectrometer Frequency | 100.61                 |
| 9 Spectral Width         | 24038.5                |

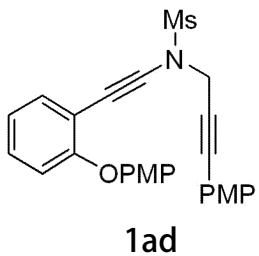

159.93  
158.40  
155.57  
150.36

133.51  
133.22  
129.54  
122.75  
119.76  
117.77  
114.66  
114.02  
113.88  
113.65

86.85  
85.67  
80.09  
77.32  
77.00  
76.68

67.16

55.48  
55.15

42.97  
38.21

133.51  
133.22

129.54

122.75

119.76

117.77

114.66  
114.02  
113.88  
113.65

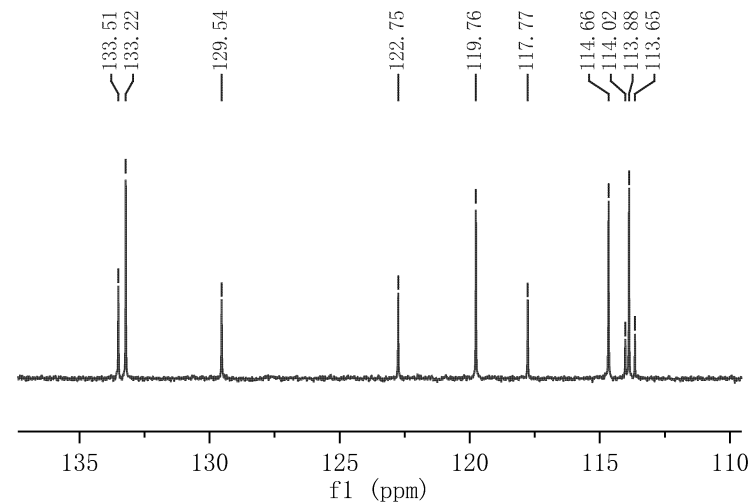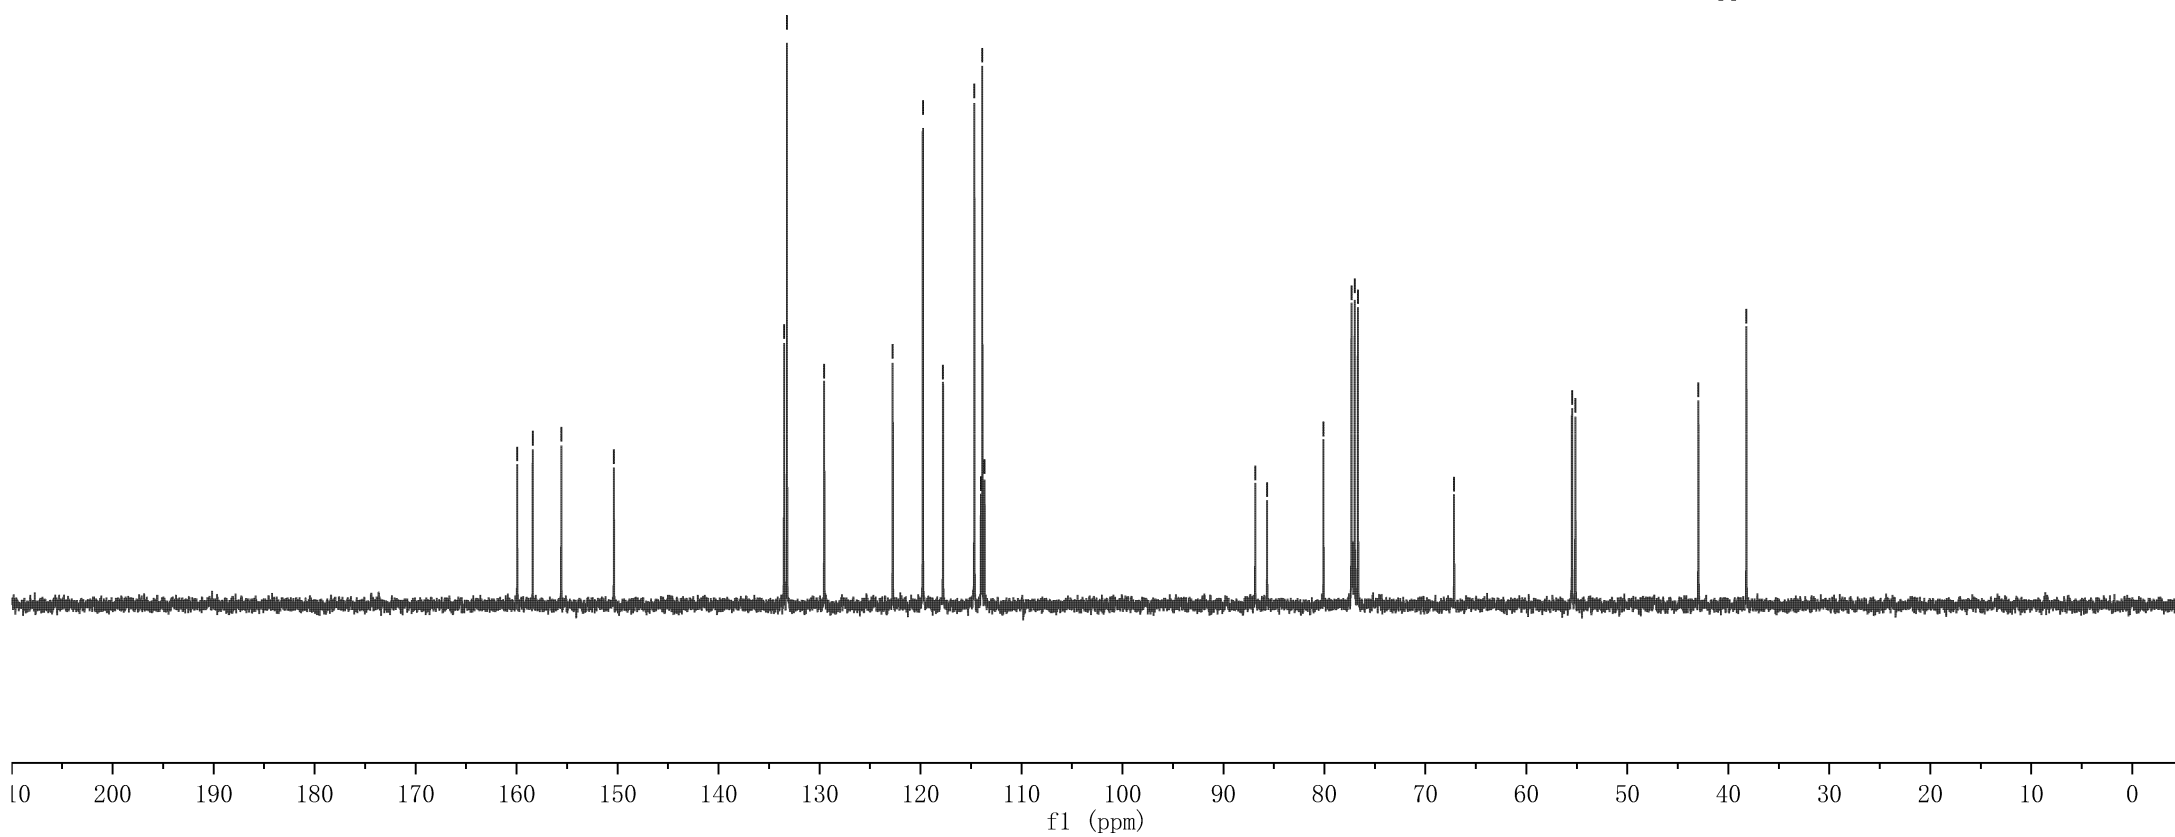

7.524  
7.521  
7.505  
7.501  
7.493  
7.474  
7.466  
7.444  
7.404  
7.385  
7.366  
7.309  
7.287  
7.265  
7.198  
7.125  
7.106  
7.087  
7.028  
7.008  
6.989  
6.968  
6.748  
6.727

| Parameter                | Value               |
|--------------------------|---------------------|
| 1 Title                  | LFS-2-191-H         |
| 2 Origin                 | Brüker BioSpin GmbH |
| 3 Solvent                | CDC13               |
| 4 Temperature            | 298.0               |
| 5 Number of Scans        | 7                   |
| 6 Acquisition Time       | 4.0894              |
| 7 Acquisition Date       | 2022-04-25T09:47:33 |
| 8 Spectrometer Frequency | 400.13              |
| 9 Spectral Width         | 8012.8              |

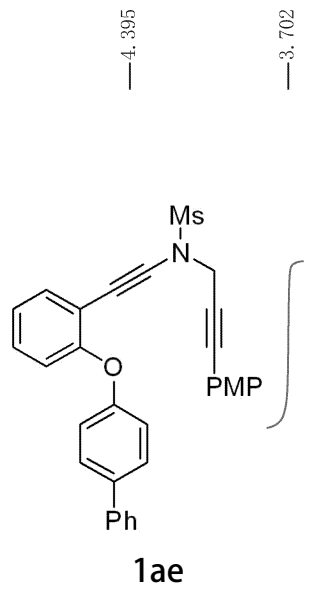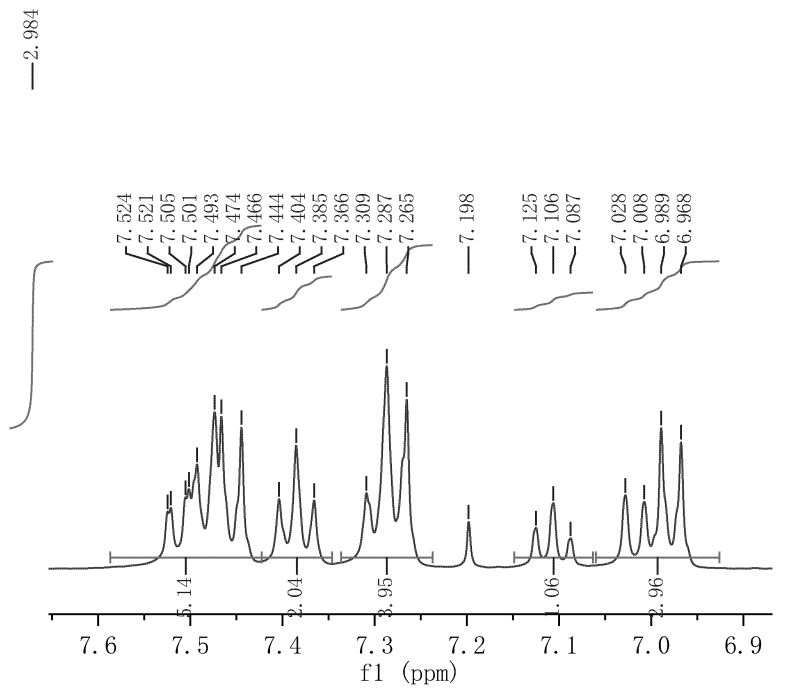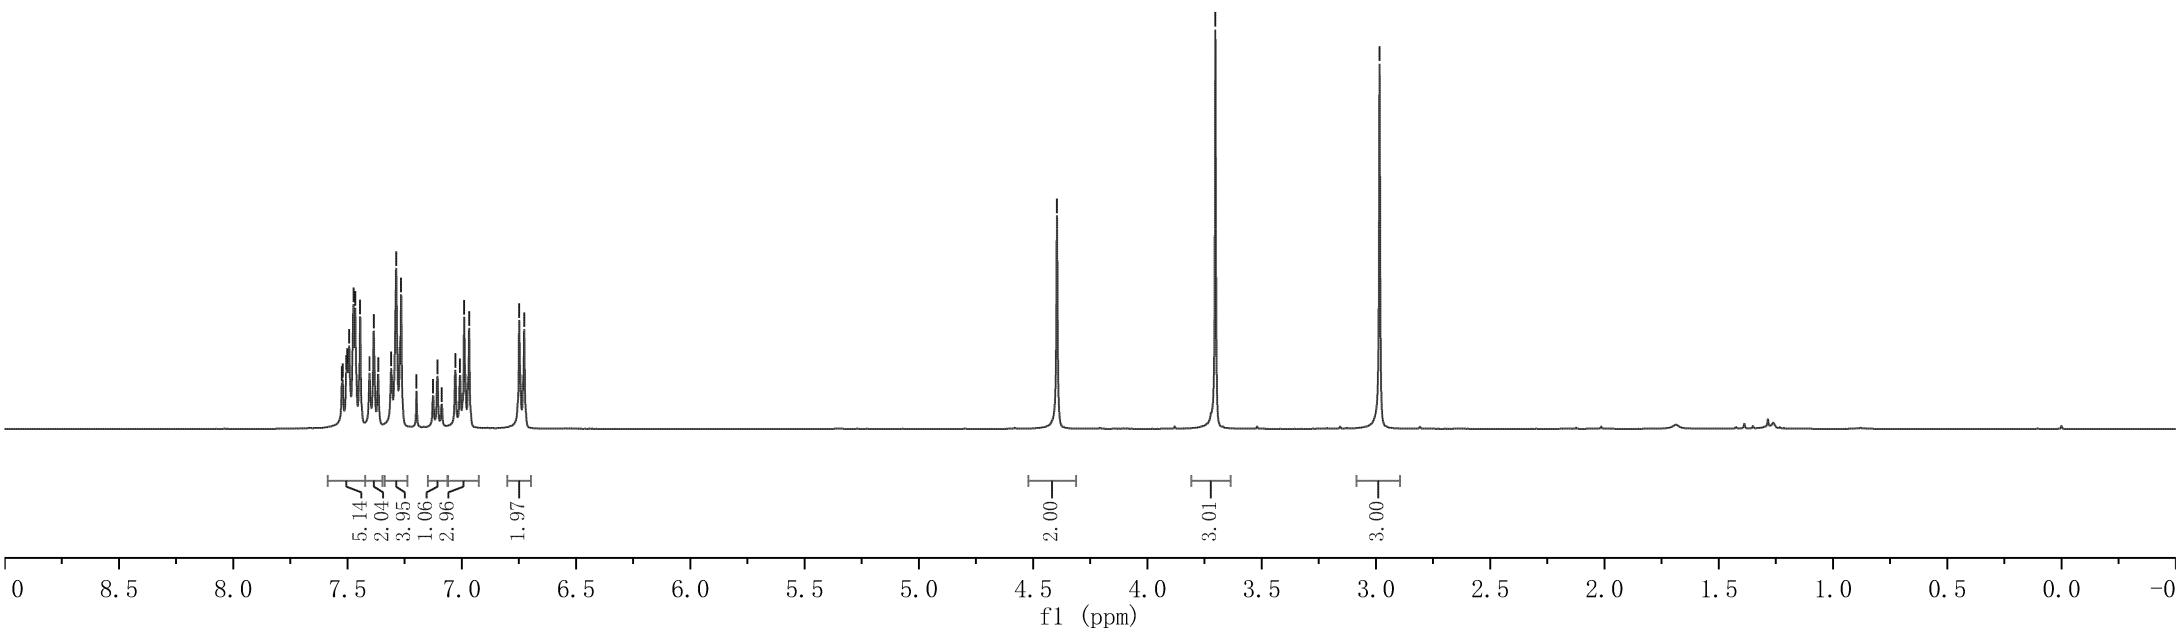

| Parameter                | Value               |
|--------------------------|---------------------|
| 1 Title                  | LFS-2-191-C         |
| 2 Origin                 | Bruker BioSpin GmbH |
| 3 Solvent                | CDC13               |
| 4 Temperature            | 300.0               |
| 5 Number of Scans        | 30                  |
| 6 Acquisition Time       | 1.3631              |
| 7 Acquisition Date       | 2022-04-25T09:49:00 |
| 8 Spectrometer Frequency | 100.61              |
| 9 Spectral Width         | 24038.5             |

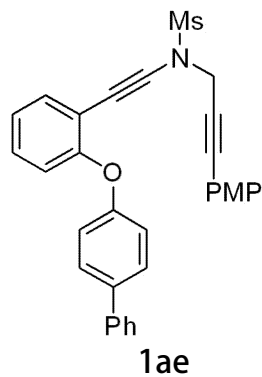

159.96  
157.00  
156.68

140.20  
135.63  
133.61  
133.21  
129.71  
128.71  
128.15  
126.93  
126.62  
123.94  
119.96  
117.76  
115.39  
113.90  
113.62

86.84  
86.20  
80.05  
77.32  
77.00  
76.68

66.87

55.11

42.93

38.20

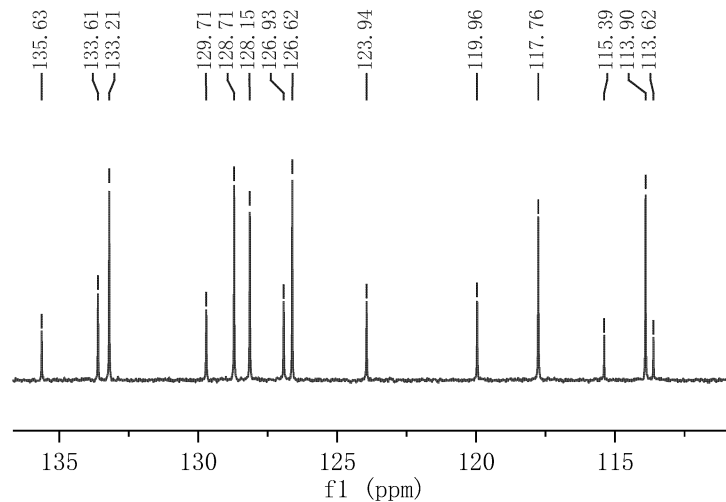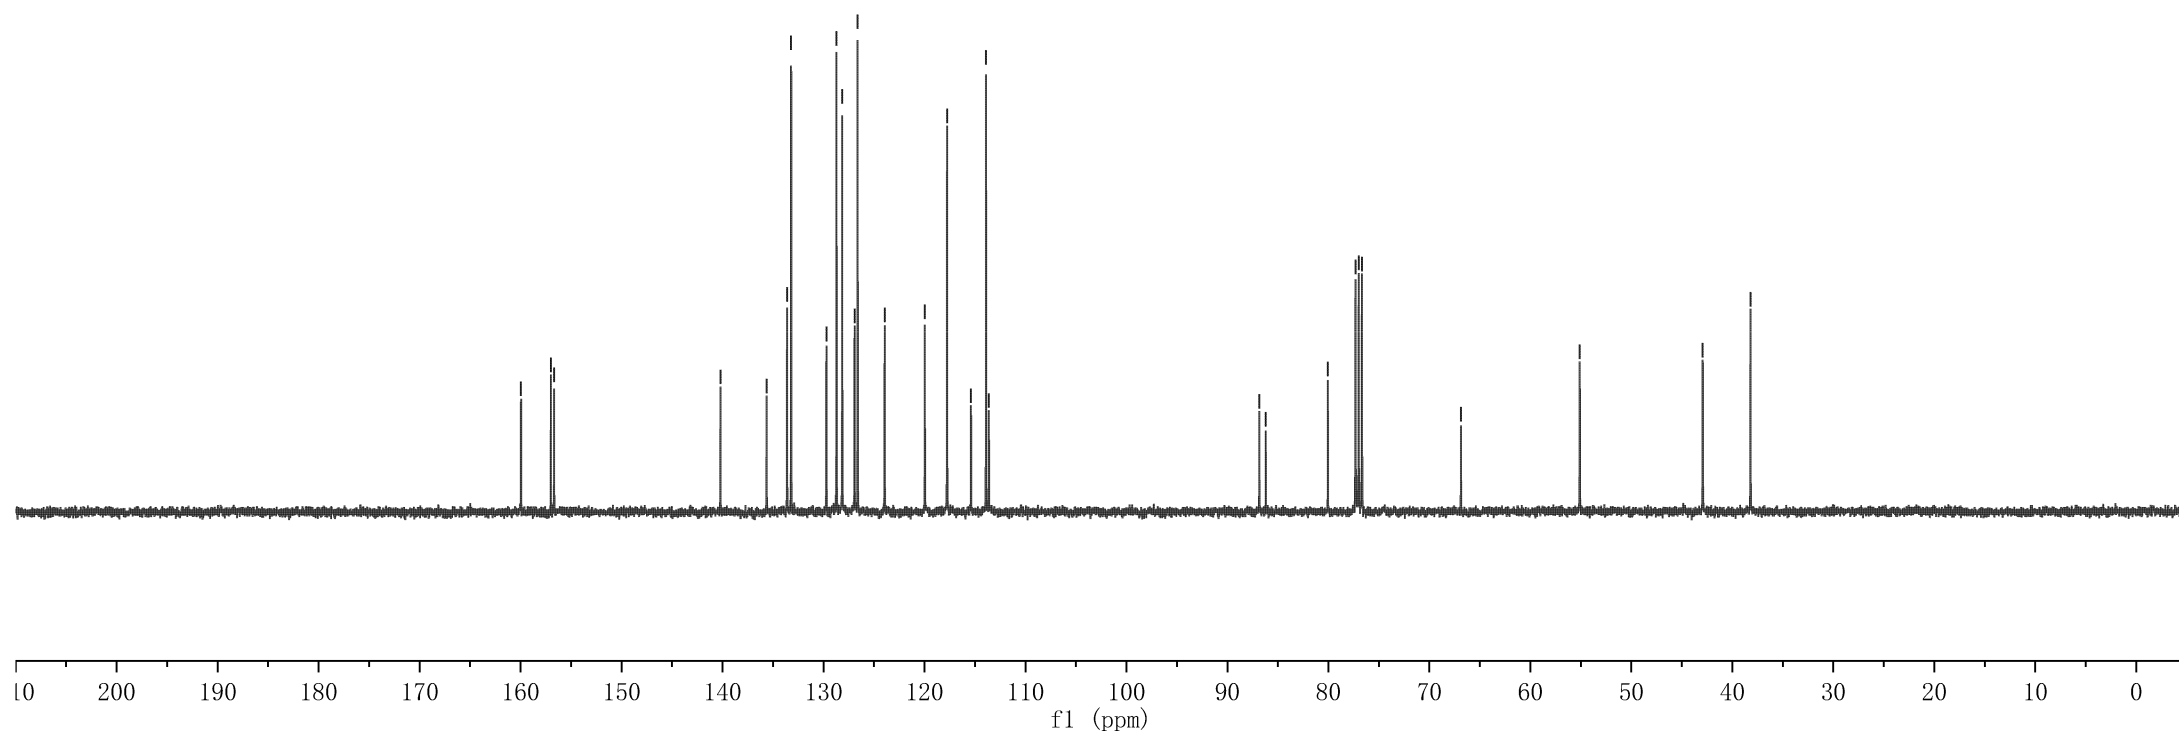

7.501  
7.484  
7.304  
7.283  
7.275  
7.254  
7.230  
7.184  
7.162  
7.122  
7.103  
7.084  
6.954  
6.933  
6.845  
6.823  
6.817  
6.795

4.416

3.777

3.037

| Parameter                | Value               |
|--------------------------|---------------------|
| 1 Title                  | MYN-1-221-H         |
| 2 Origin                 | Bruker BioSpin GmbH |
| 3 Solvent                | CDC13               |
| 4 Temperature            | 298.0               |
| 5 Number of Scans        | 13                  |
| 6 Acquisition Time       | 4.0894              |
| 7 Acquisition Date       | 2022-06-23T15:53:52 |
| 8 Spectrometer Frequency | 400.13              |
| 9 Spectral Width         | 8012.8              |

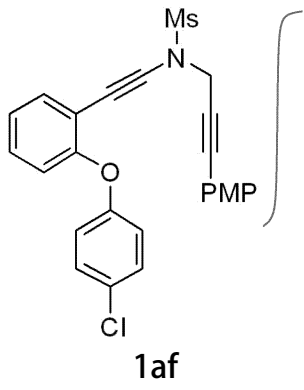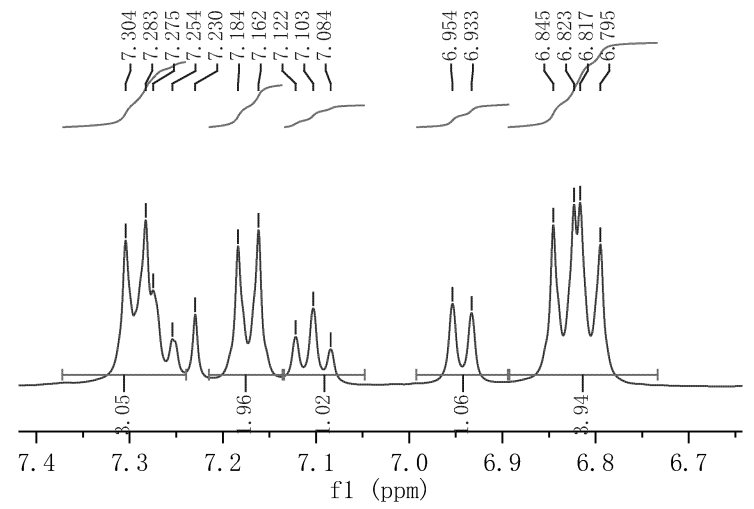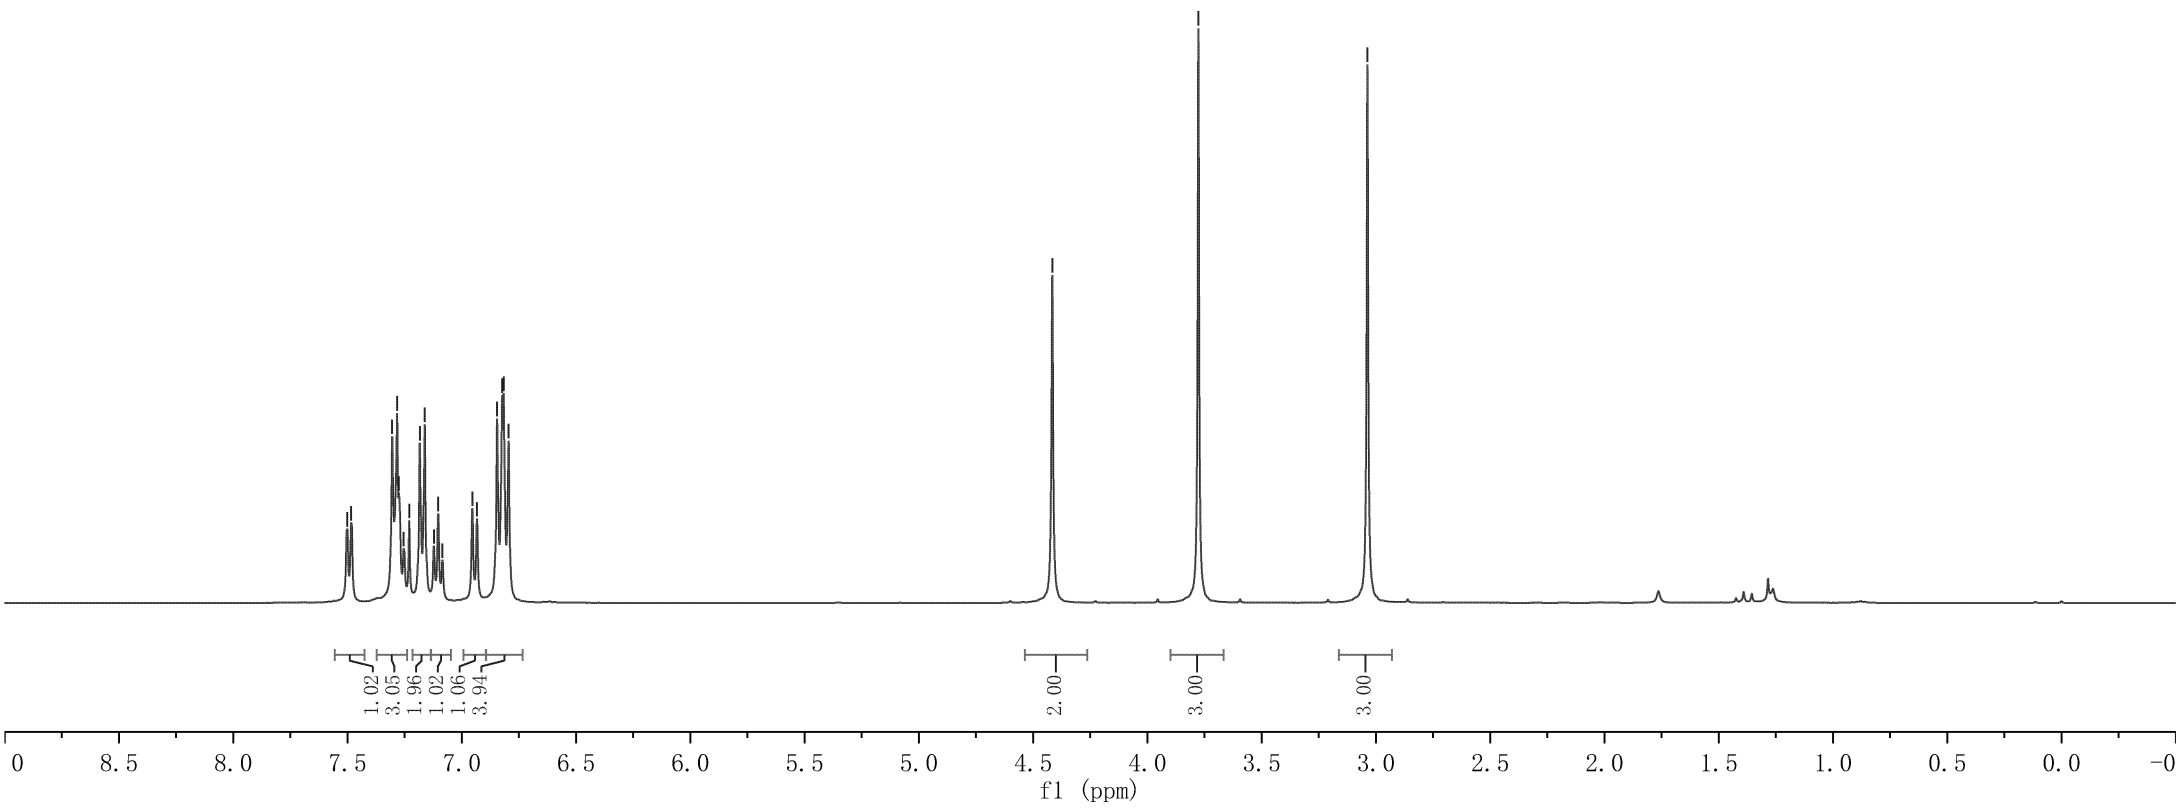

| Parameter                | Value               |
|--------------------------|---------------------|
| 1 Title                  | MYN-1-221-C         |
| 2 Origin                 | Bruker BioSpin GmbH |
| 3 Solvent                | CDC13               |
| 4 Temperature            | 300.0               |
| 5 Number of Scans        | 13                  |
| 6 Acquisition Time       | 1.3631              |
| 7 Acquisition Date       | 2022-06-23T15:56:25 |
| 8 Spectrometer Frequency | 100.61              |
| 9 Spectral Width         | 24038.5             |

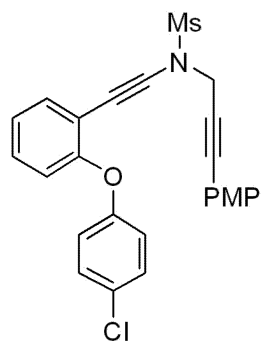

**1af**

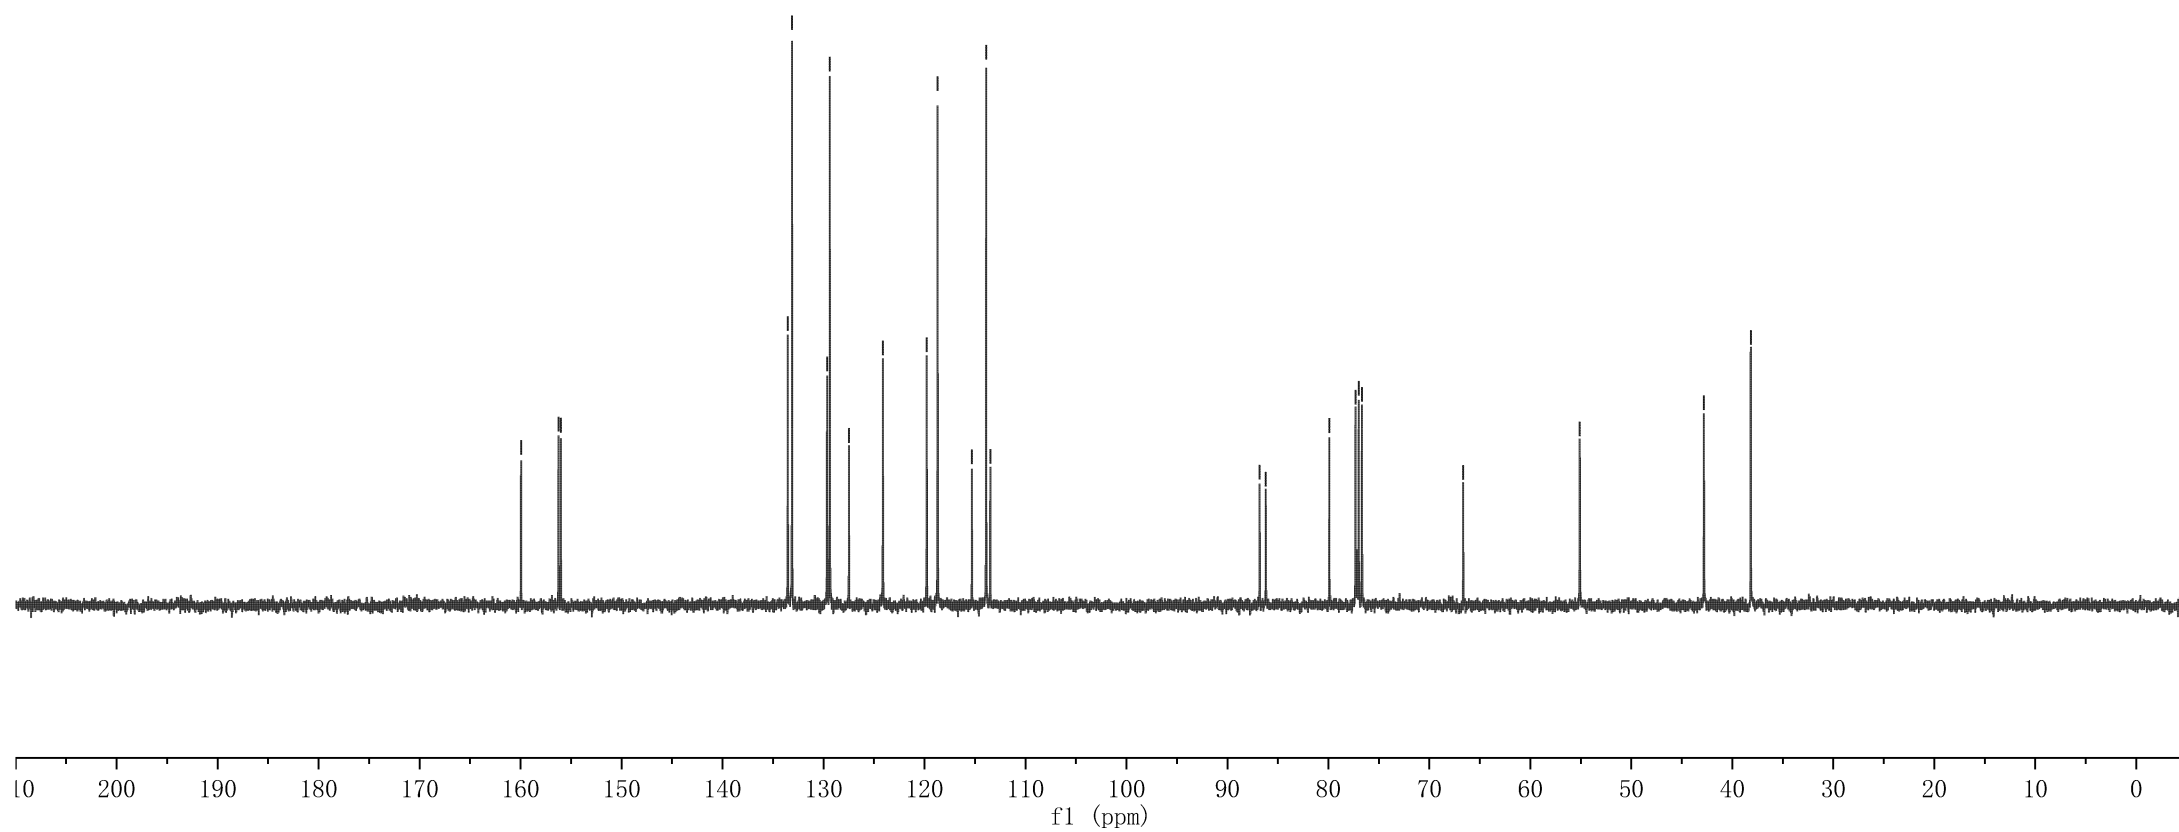

159.95  
156.24  
156.01

133.54  
133.11  
129.65  
129.37  
127.48  
124.12  
119.78  
118.70  
115.30  
113.89  
113.48

86.81  
86.20  
79.91  
77.32  
77.00  
76.68

66.65

55.11

42.82  
38.18

7.568  
7.564  
7.549  
7.544  
7.496  
7.480  
7.476  
7.428  
7.411  
7.397  
7.379  
7.352  
7.350  
7.348  
7.346  
7.332  
7.327  
7.156  
7.153  
7.137  
7.134  
7.118  
7.115  
7.004  
6.987  
6.981  
6.954  
6.931  
6.921  
6.919  
6.901  
6.899

| Parameter                | Value               |
|--------------------------|---------------------|
| 1 Title                  | MYN-1-218-H         |
| 2 Origin                 | Bruker BioSpin GmbH |
| 3 Solvent                | Acetone             |
| 4 Temperature            | 298.0               |
| 5 Number of Scans        | 13                  |
| 6 Acquisition Time       | 4.0894              |
| 7 Acquisition Date       | 2022-06-21T17:44:04 |
| 8 Spectrometer Frequency | 400.13              |
| 9 Spectral Width         | 8012.8              |

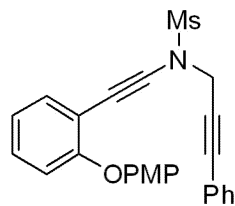

1ag

4.639

3.800

3.307

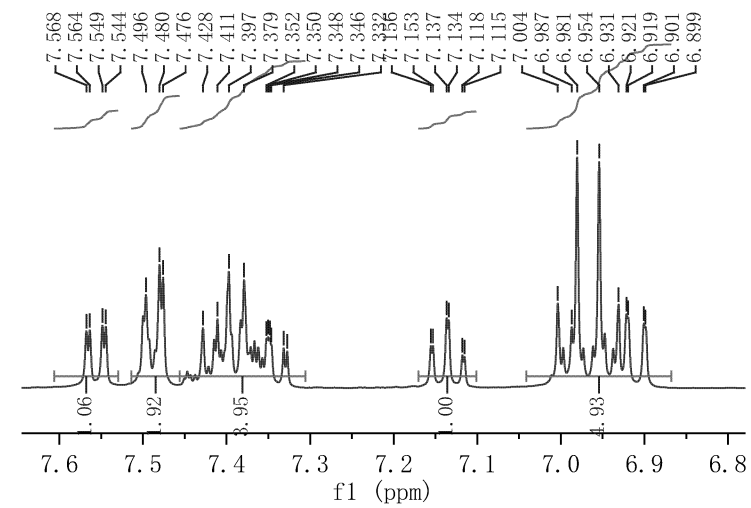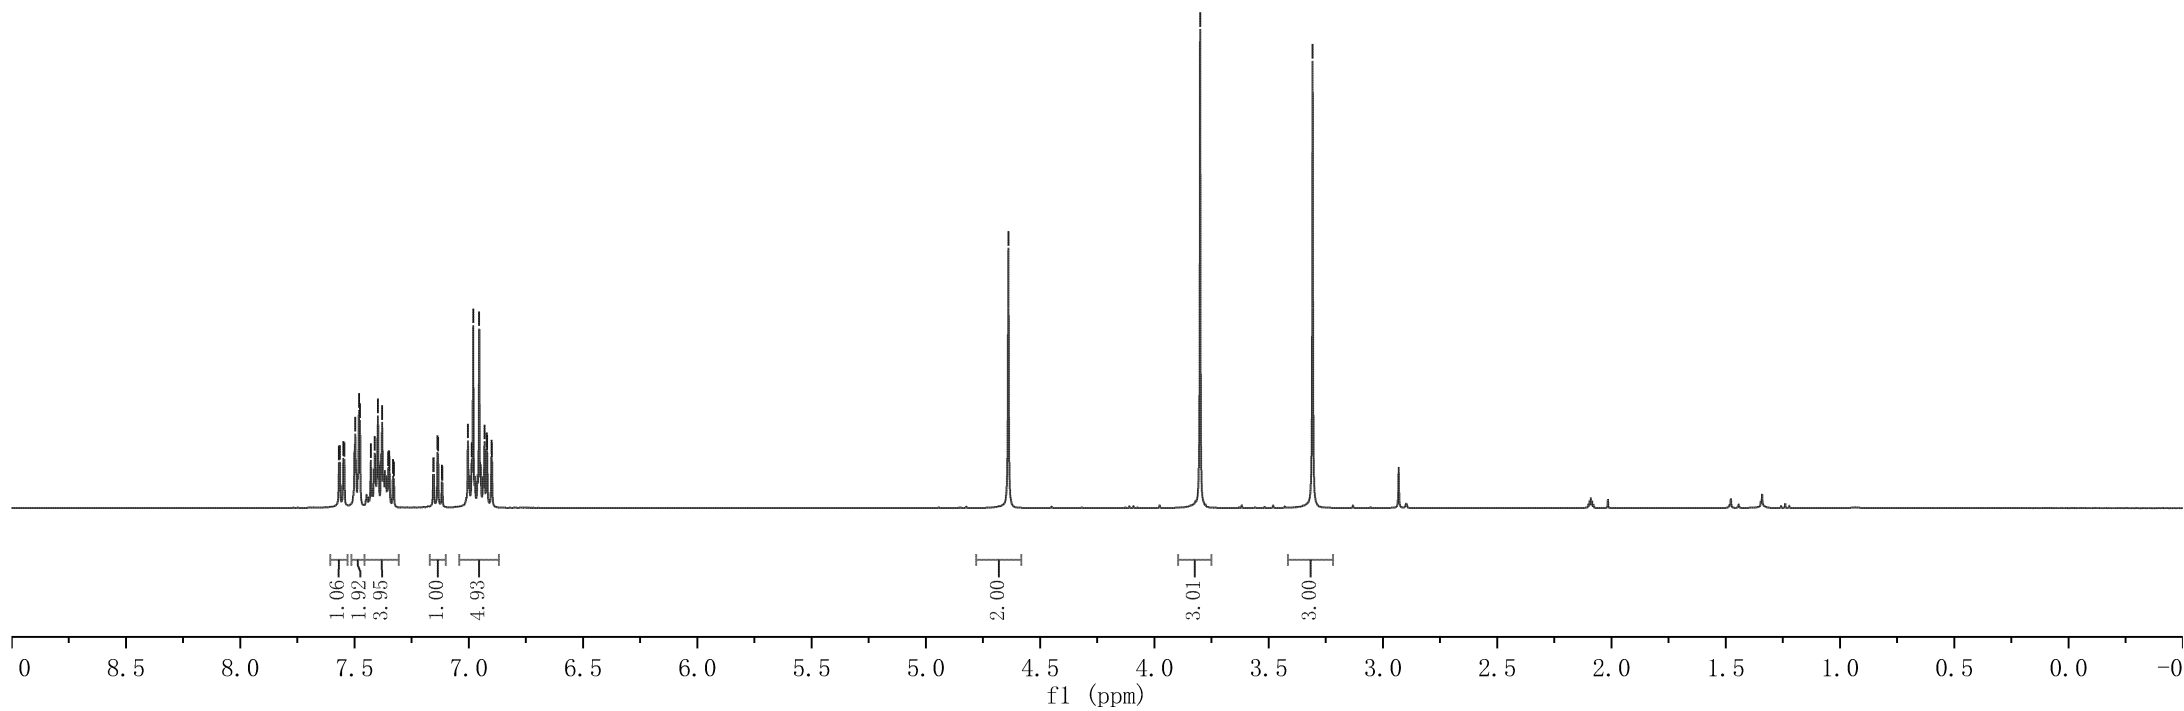

—206.26

—159.21  
—156.75  
—151.13

134.26  
132.46  
130.57  
129.75  
129.31  
123.82  
122.63  
120.60  
118.71  
115.66  
114.98

87.13  
87.04  
82.93

—67.68

—55.86

—43.29  
—38.58  
30.43  
30.24  
30.05  
29.85  
29.66  
29.47  
29.28

| Parameter                | Value               |
|--------------------------|---------------------|
| 1 Title                  | MYN-1-218-C         |
| 2 Origin                 | Bruker BioSpin GmbH |
| 3 Solvent                | Acetone             |
| 4 Temperature            | 300.0               |
| 5 Number of Scans        | 24                  |
| 6 Acquisition Time       | 1.3631              |
| 7 Acquisition Date       | 2022-06-21T17:46:34 |
| 8 Spectrometer Frequency | 100.61              |
| 9 Spectral Width         | 24038.5             |

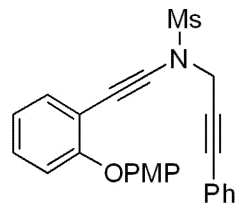

1ag

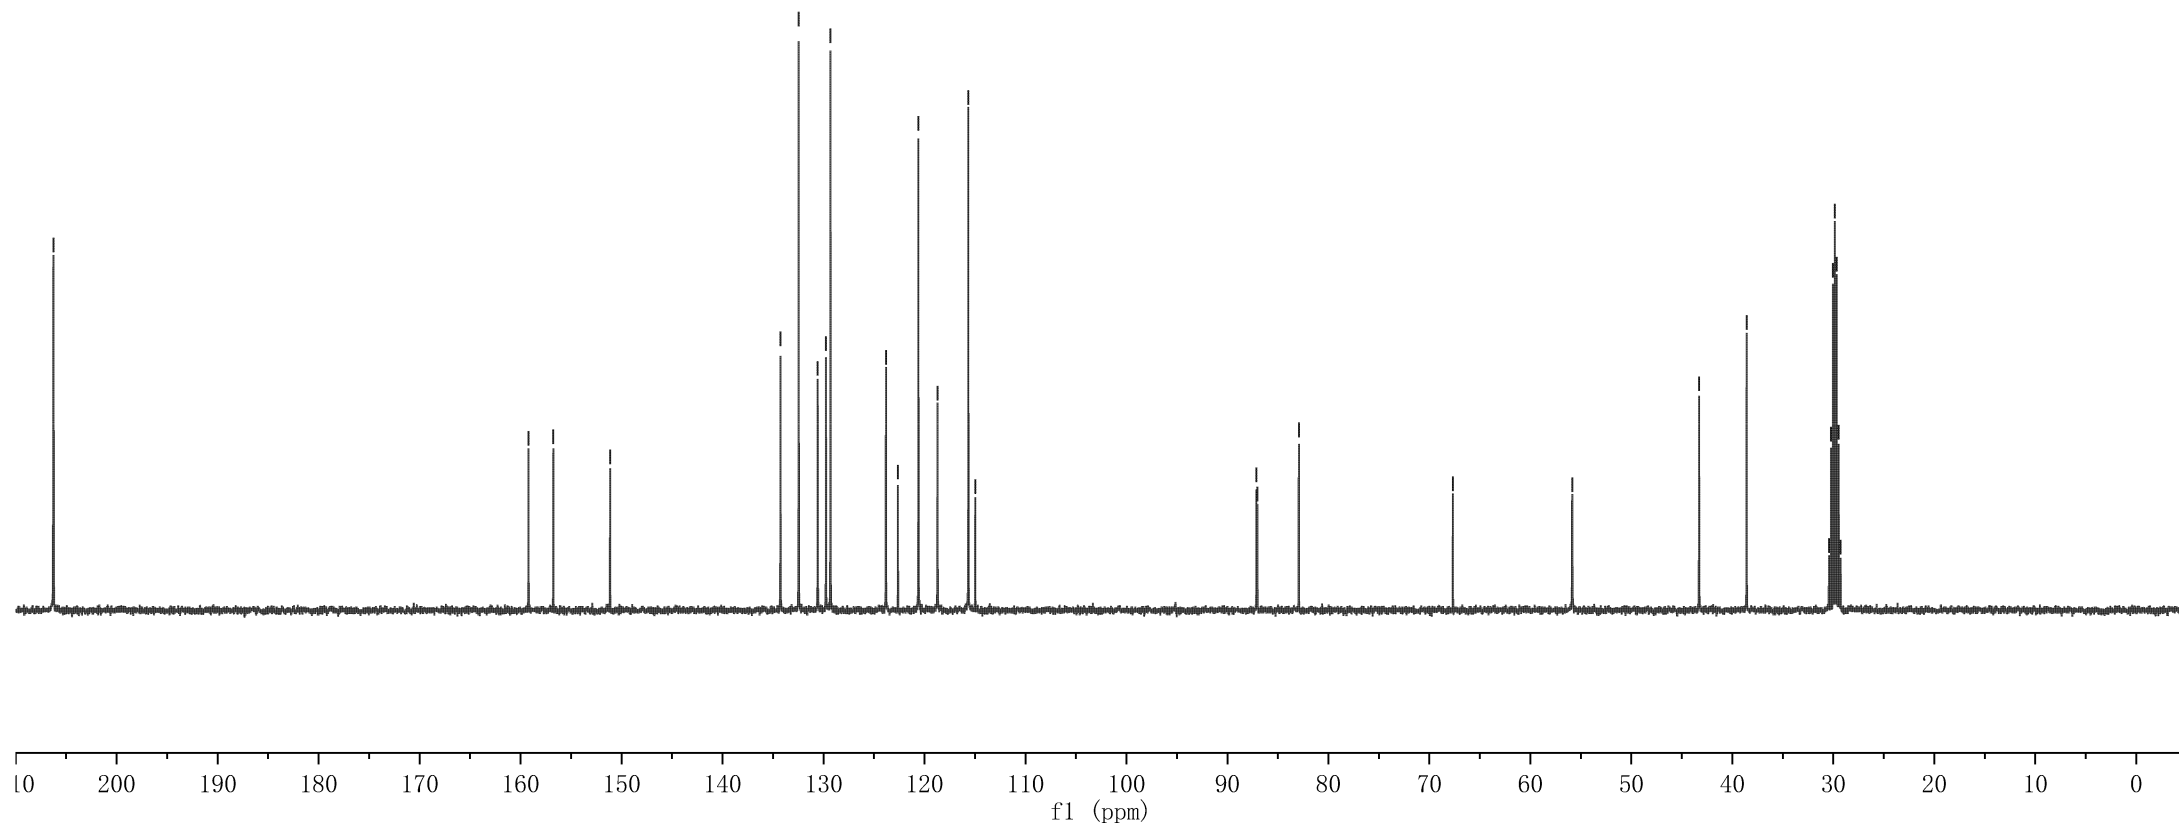

| Parameter                | Value               |
|--------------------------|---------------------|
| 1 Title                  | LFS-2-205-H         |
| 2 Origin                 |                     |
| 3 Solvent                | CDCl3               |
| 4 Temperature            | 299.4               |
| 5 Number of Scans        | 16                  |
| 6 Acquisition Time       | 4.0002              |
| 7 Acquisition Date       | 2022-04-29T17:33:21 |
| 8 Spectrometer Frequency | 399.92              |
| 9 Spectral Width         | 8012.0              |

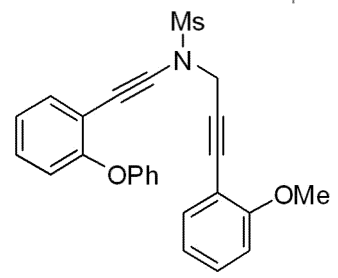

1ah

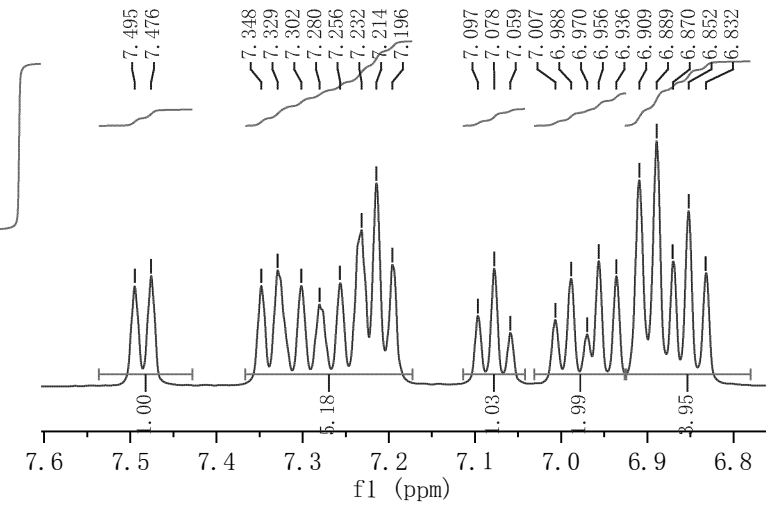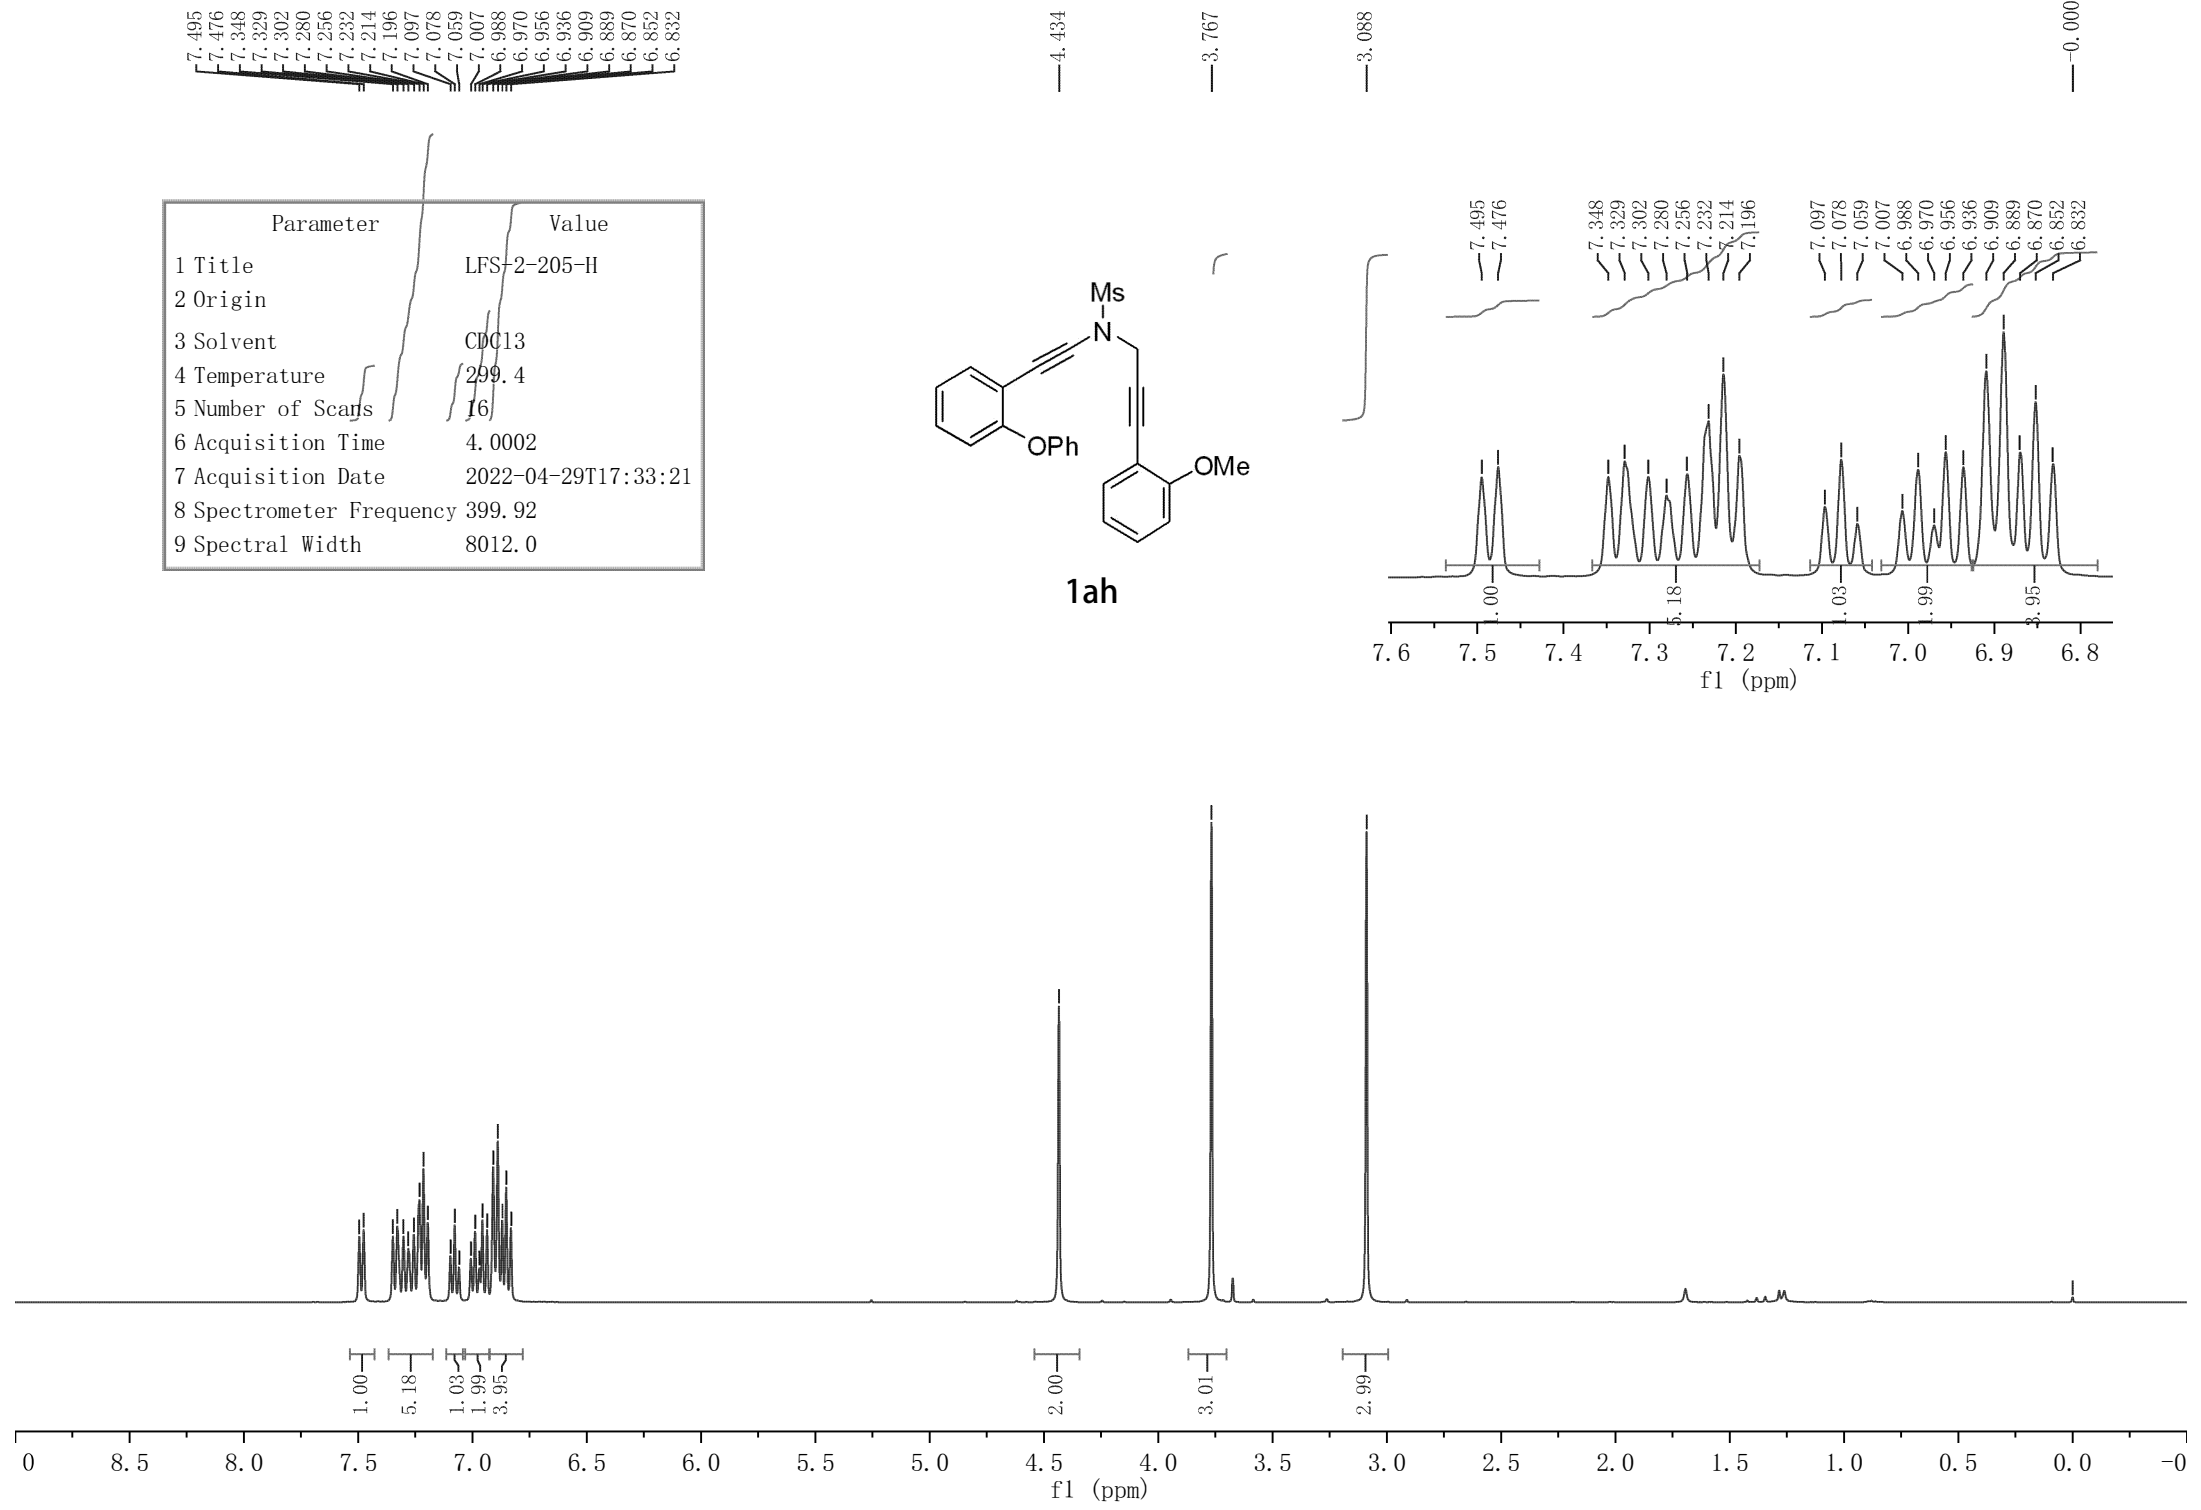

7.495  
7.476  
7.348  
7.329  
7.302  
7.280  
7.256  
7.232  
7.214  
7.196  
7.097  
7.078  
7.059  
7.007  
6.988  
6.970  
6.956  
6.936  
6.909  
6.889  
6.870  
6.852  
6.832

4.434

3.767

3.088

0.000



160.17  
157.35  
156.76

133.54  
133.48  
130.28  
129.55  
129.49  
123.70  
122.62  
120.36  
119.77  
117.57  
115.35  
110.96  
110.58

86.21  
85.34  
83.35  
77.32  
77.00  
76.68

66.80

55.40

43.18

38.10

| Parameter                | Value               |
|--------------------------|---------------------|
| 1 Title                  | LFS-2-205-C-2-OMe   |
| 2 Origin                 |                     |
| 3 Solvent                | CDC13               |
| 4 Temperature            | 299.2               |
| 5 Number of Scans        | 200                 |
| 6 Acquisition Time       | 1.0000              |
| 7 Acquisition Date       | 2022-04-29T17:42:15 |
| 8 Spectrometer Frequency | 100.56              |
| 9 Spectral Width         | 26041.0             |

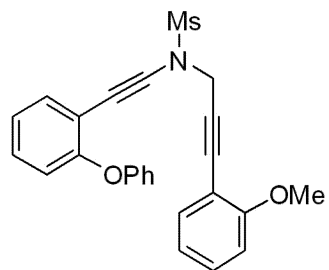

1ah

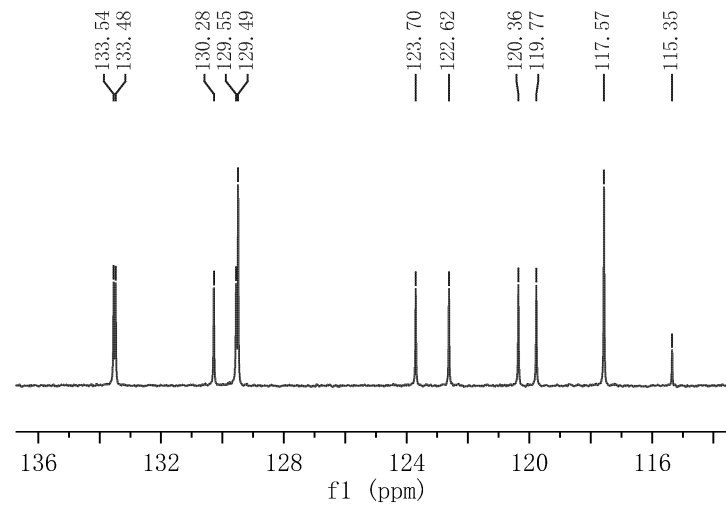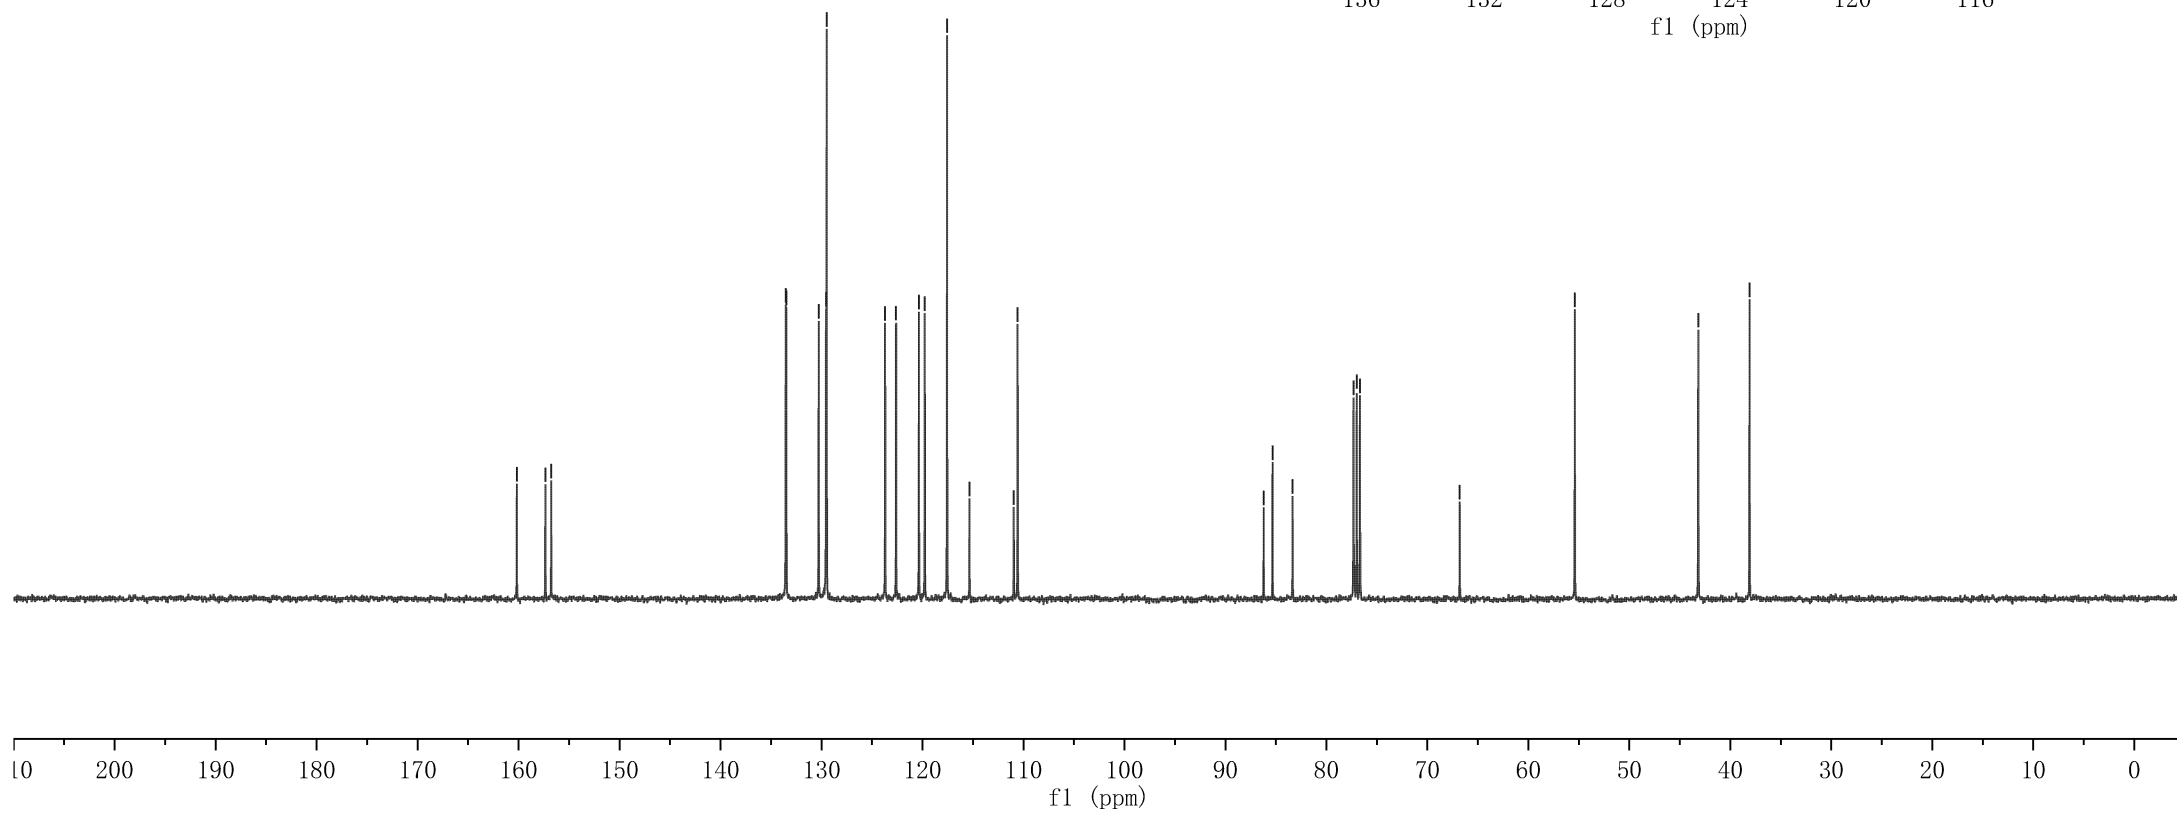

7.497  
7.493  
7.477  
7.473  
7.315  
7.310  
7.297  
7.294  
7.275  
7.258  
7.254  
7.242  
7.120  
7.117  
7.101  
7.098  
7.082  
7.080  
7.060  
7.042  
7.023  
6.980  
6.978  
6.956  
6.953  
6.934  
6.932

| Parameter                | Value               |
|--------------------------|---------------------|
| 1 Title                  | zjj-15-149-H        |
| 2 Origin                 | Bruker BioSpin GmbH |
| 3 Solvent                | CDC13               |
| 4 Temperature            | 298.0               |
| 5 Number of Scans        | 11                  |
| 6 Acquisition Time       | 4.0894              |
| 7 Acquisition Date       | 2023-01-31T20:28:19 |
| 8 Spectrometer Frequency | 400.13              |
| 9 Spectral Width         | 8012.8              |

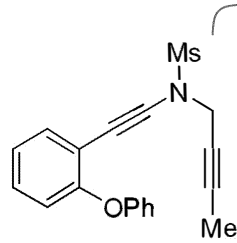

1ai

4.145  
4.139  
4.133  
4.128

—2.964

1.787  
1.781  
1.775

—0.000

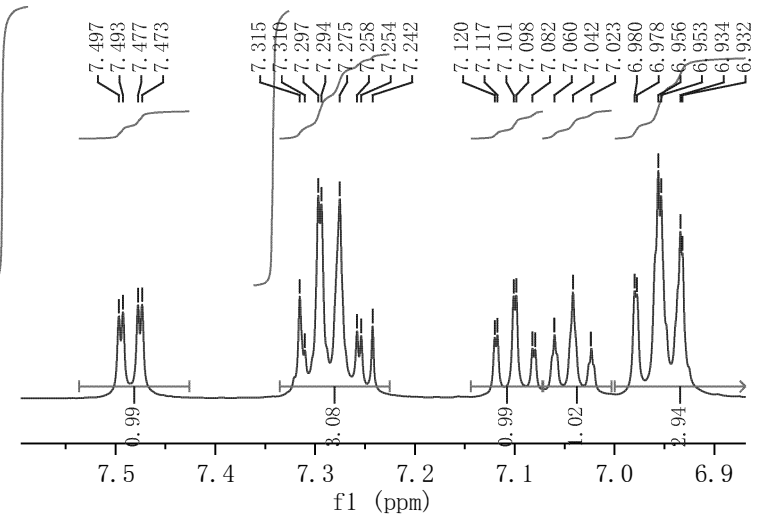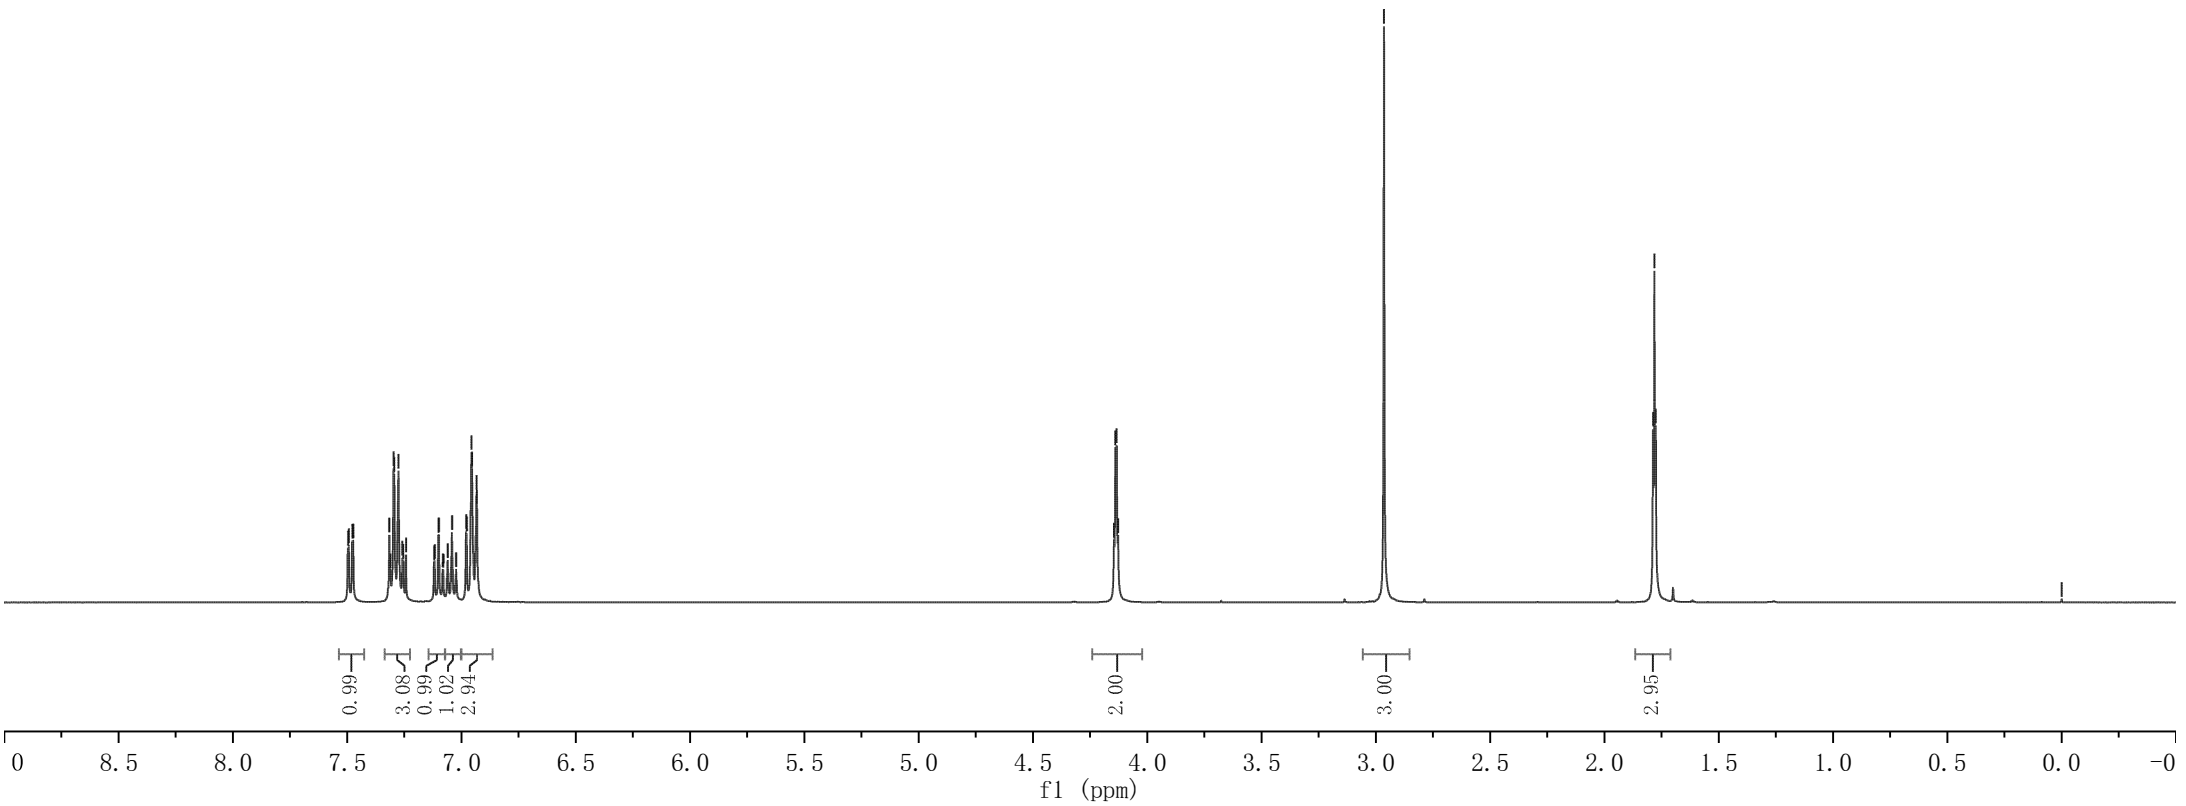

| Parameter                | Value               |
|--------------------------|---------------------|
| 1 Title                  | zjj-15-149-C        |
| 2 Origin                 | Bruker BioSpin GmbH |
| 3 Solvent                | CDC13               |
| 4 Temperature            | 300.0               |
| 5 Number of Scans        | 25                  |
| 6 Acquisition Time       | 1.3631              |
| 7 Acquisition Date       | 2023-01-31T20:32:36 |
| 8 Spectrometer Frequency | 100.61              |
| 9 Spectral Width         | 24038.5             |

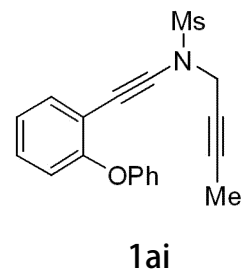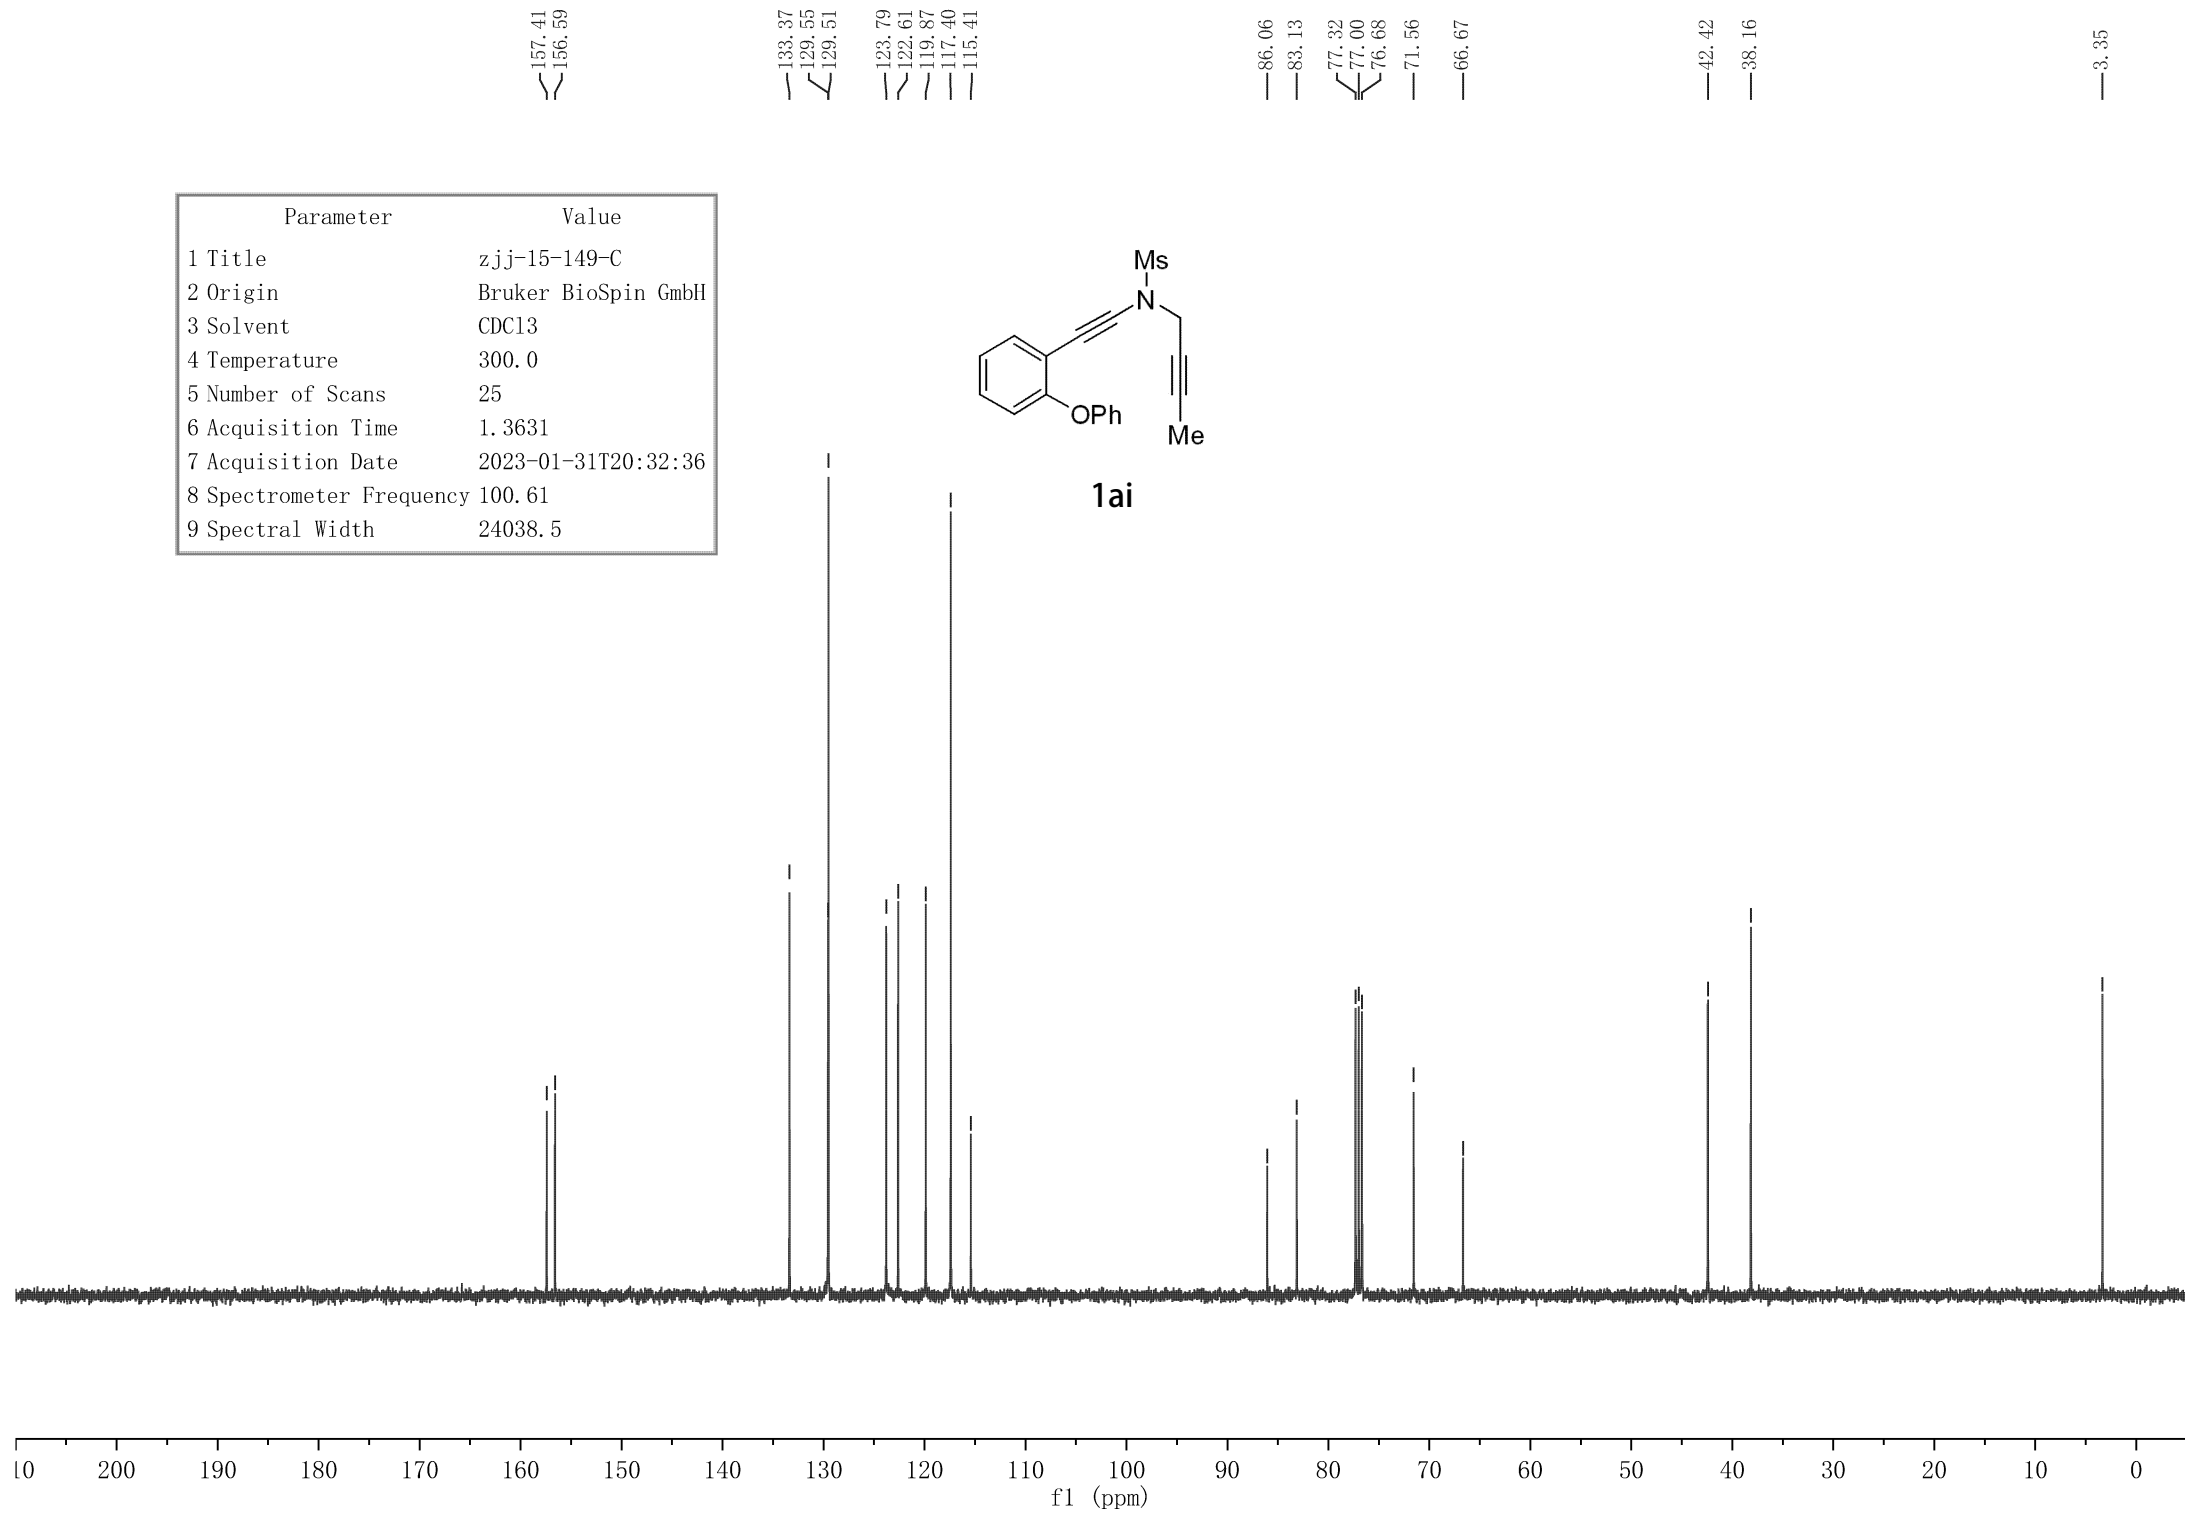

7.371  
7.366  
7.355  
7.351  
7.337  
7.332  
7.316  
7.312  
7.306  
7.302  
7.286  
7.267  
7.262  
7.244  
7.203  
7.181  
7.134  
7.130  
7.113  
7.095  
7.091  
7.042  
7.040  
7.022  
7.020  
6.922  
6.919  
6.903  
6.900  
6.884  
6.882  
6.800  
6.778  
6.700  
6.695

| Parameter                | Value                   |
|--------------------------|-------------------------|
| 1 Title                  | zjj-13-197-Ms-chanwu-II |
| 2 Origin                 | Bruker BioSpin GmbH     |
| 3 Solvent                | CDCl3                   |
| 4 Temperature            | 298.0                   |
| 5 Number of Scans        | 10                      |
| 6 Acquisition Time       | 4.0894                  |
| 7 Acquisition Date       | 2022-02-24T17:04:25     |
| 8 Spectrometer Frequency | 400.13                  |
| 9 Spectral Width         | 8012.8                  |

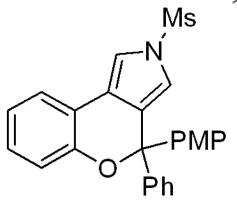

2a

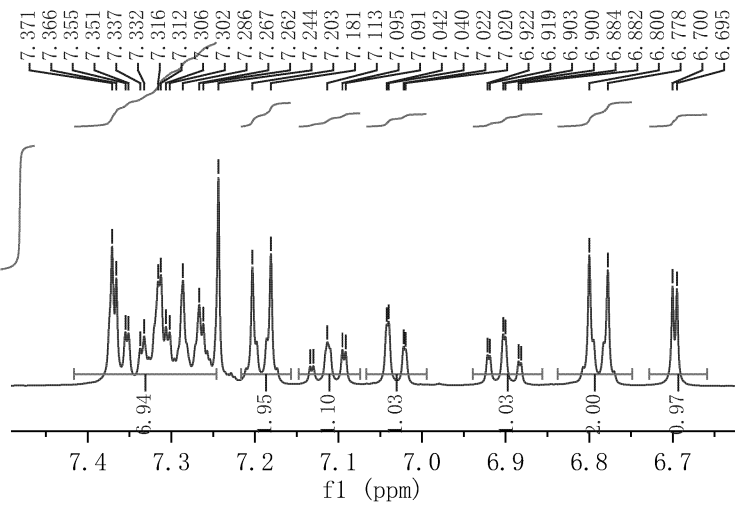

3.751

3.136

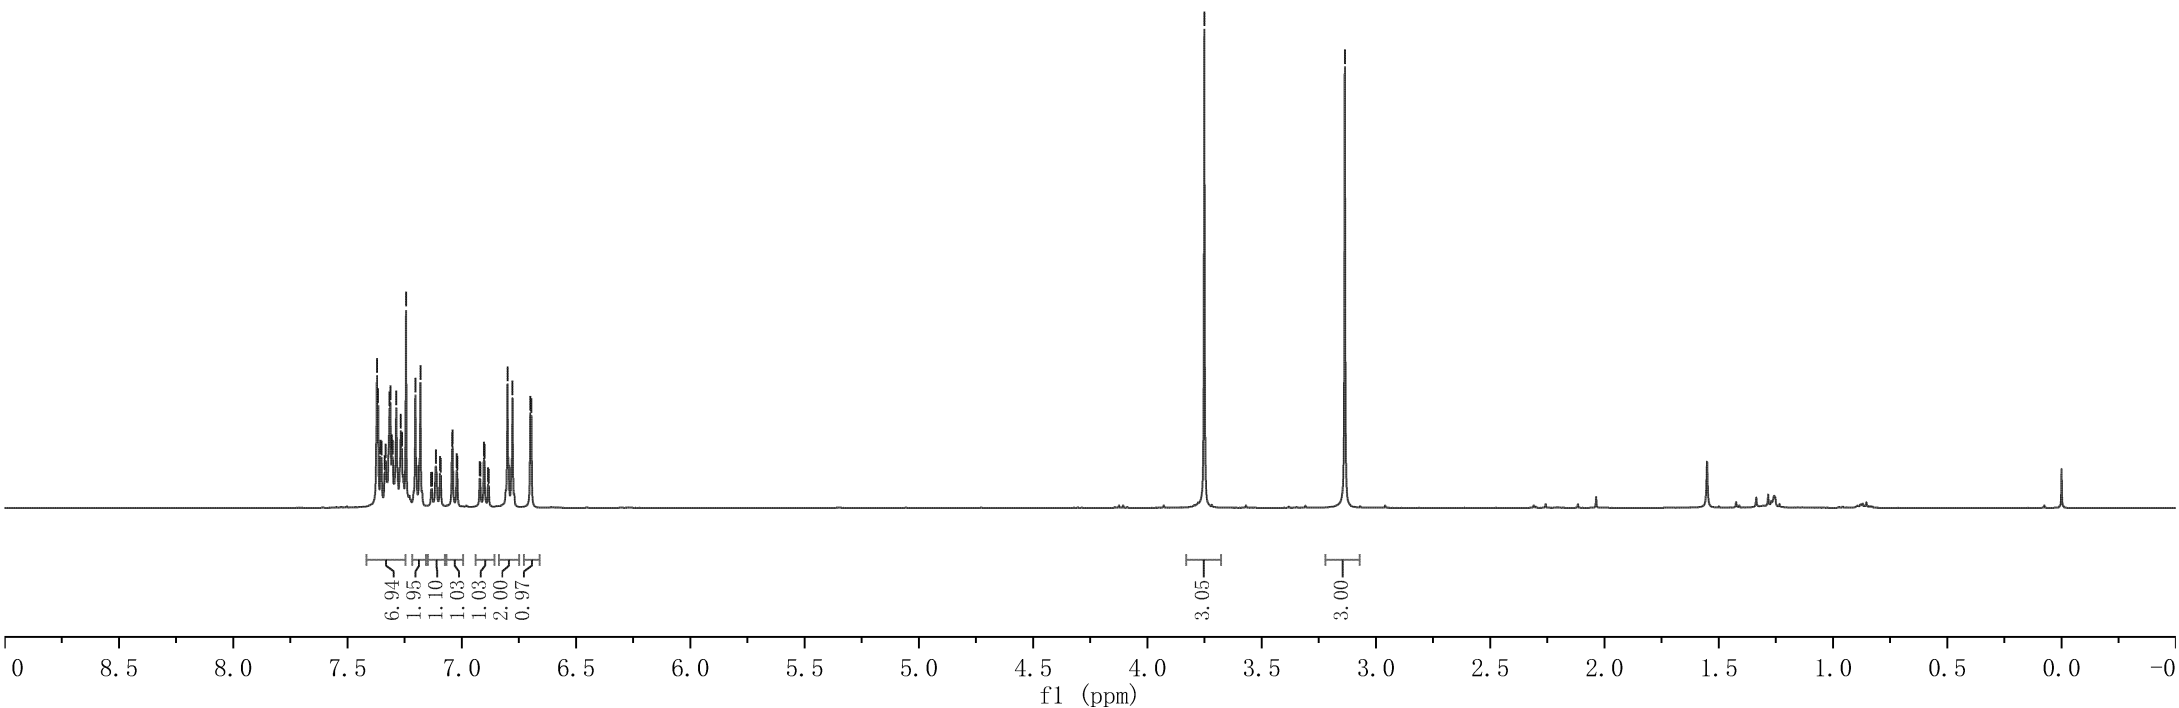

| Parameter                | Value                  |
|--------------------------|------------------------|
| 1 Title                  | zjj-13-197-Ms-chanwu-C |
| 2 Origin                 | Bruker BioSpin GmbH    |
| 3 Solvent                | CDC13                  |
| 4 Temperature            | 300.0                  |
| 5 Number of Scans        | 67                     |
| 6 Acquisition Time       | 1.3631                 |
| 7 Acquisition Date       | 2022-02-24T17:06:54    |
| 8 Spectrometer Frequency | 100.61                 |
| 9 Spectral Width         | 24038.5                |

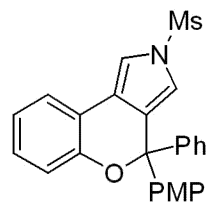

2a

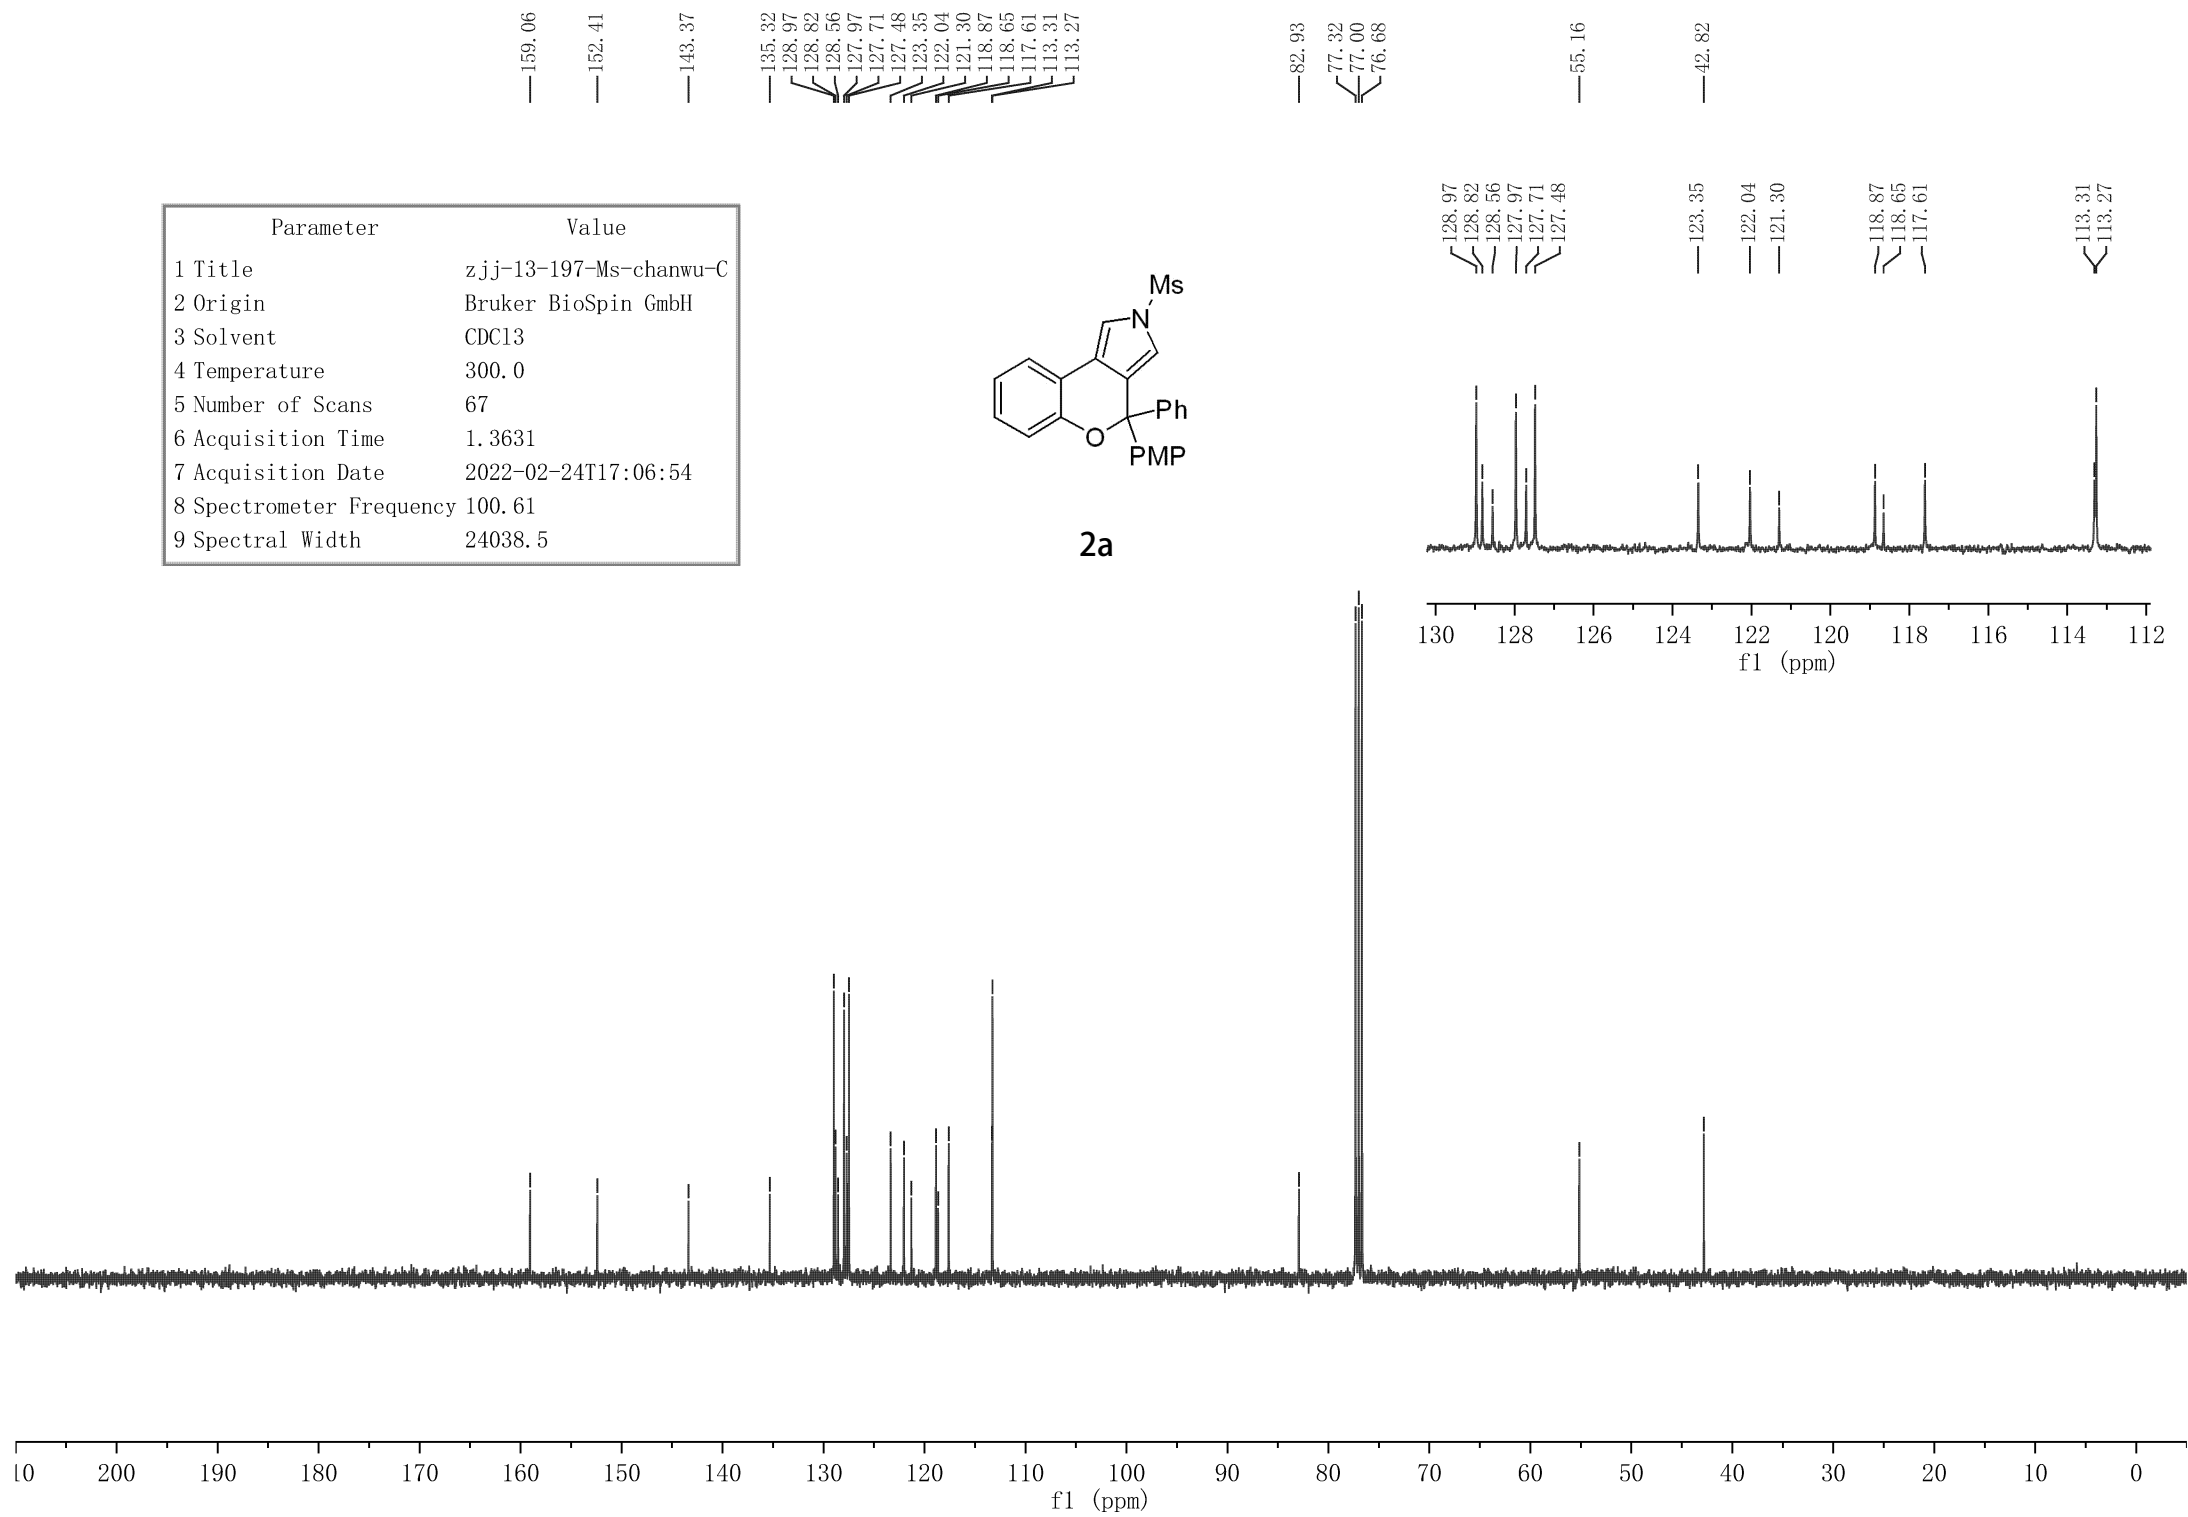

| Parameter                | Value                |
|--------------------------|----------------------|
| 1 Title                  | zjj-13-197-Ms-C-dept |
| 2 Origin                 | Bruker BioSpin GmbH  |
| 3 Solvent                | CDC13                |
| 4 Temperature            | 300.0                |
| 5 Number of Scans        | 16                   |
| 6 Acquisition Time       | 1.3631               |
| 7 Acquisition Date       | 2022-02-24T17:10:40  |
| 8 Spectrometer Frequency | 100.61               |
| 9 Spectral Width         | 24038.5              |

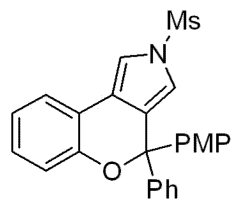

**2a**

129.04  
128.88  
128.03  
127.77  
127.55  
123.41  
122.10  
118.94  
117.67  
113.38  
113.33

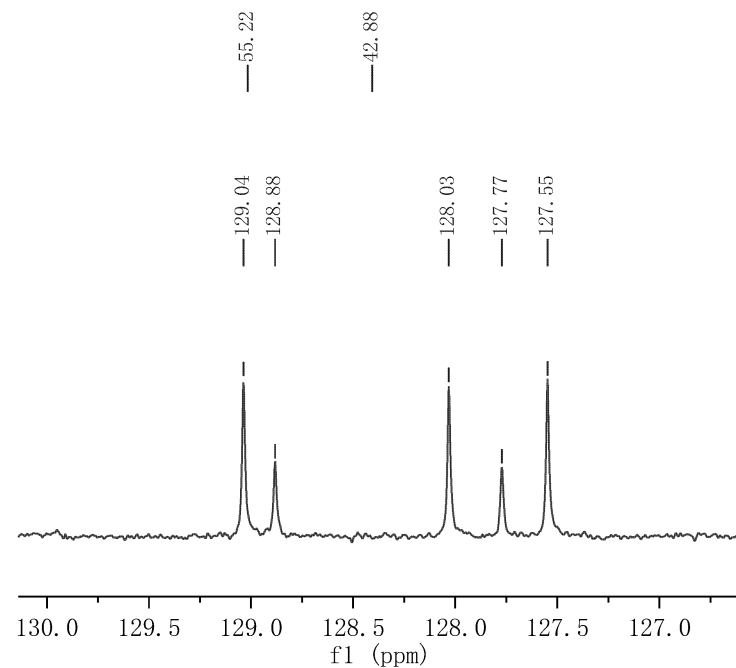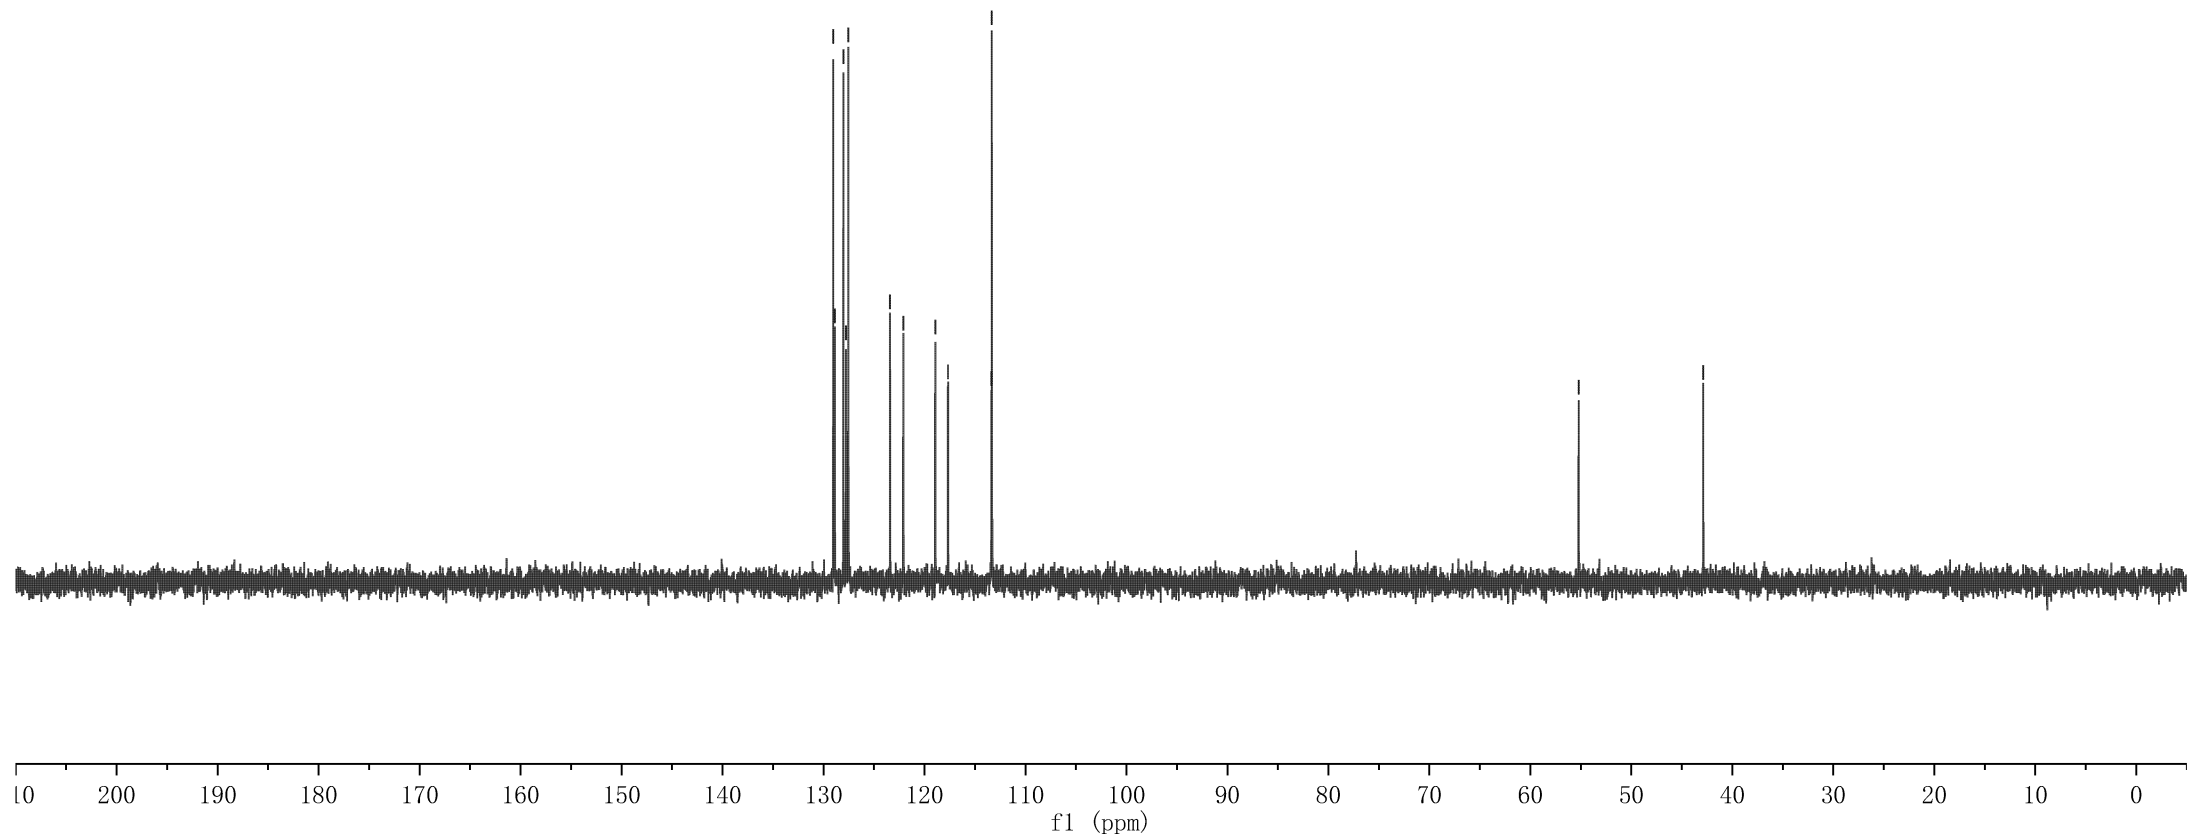

7.590  
7.586  
7.570  
7.566  
7.382  
7.378  
7.371  
7.349  
7.330  
7.326  
7.257  
7.237  
7.233  
7.219  
7.202  
7.184  
7.181  
7.161  
7.158  
7.142  
6.849  
6.827

| Parameter                | Value               |
|--------------------------|---------------------|
| 1 Title                  | zjj-12-218-1        |
| 2 Origin                 | Bruker BioSpin GmbH |
| 3 Solvent                | CDC13               |
| 4 Temperature            | 298.0               |
| 5 Number of Scans        | 11                  |
| 6 Acquisition Time       | 4.0894              |
| 7 Acquisition Date       | 2021-11-07T20:29:32 |
| 8 Spectrometer Frequency | 400.13              |
| 9 Spectral Width         | 8012.8              |

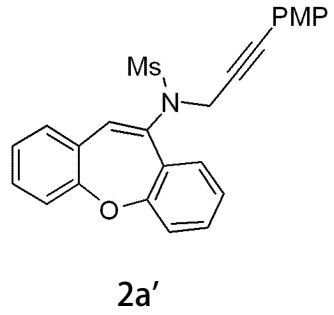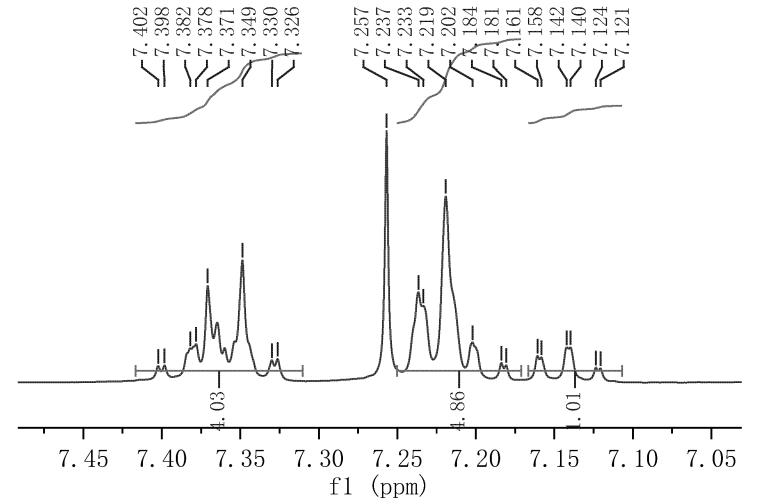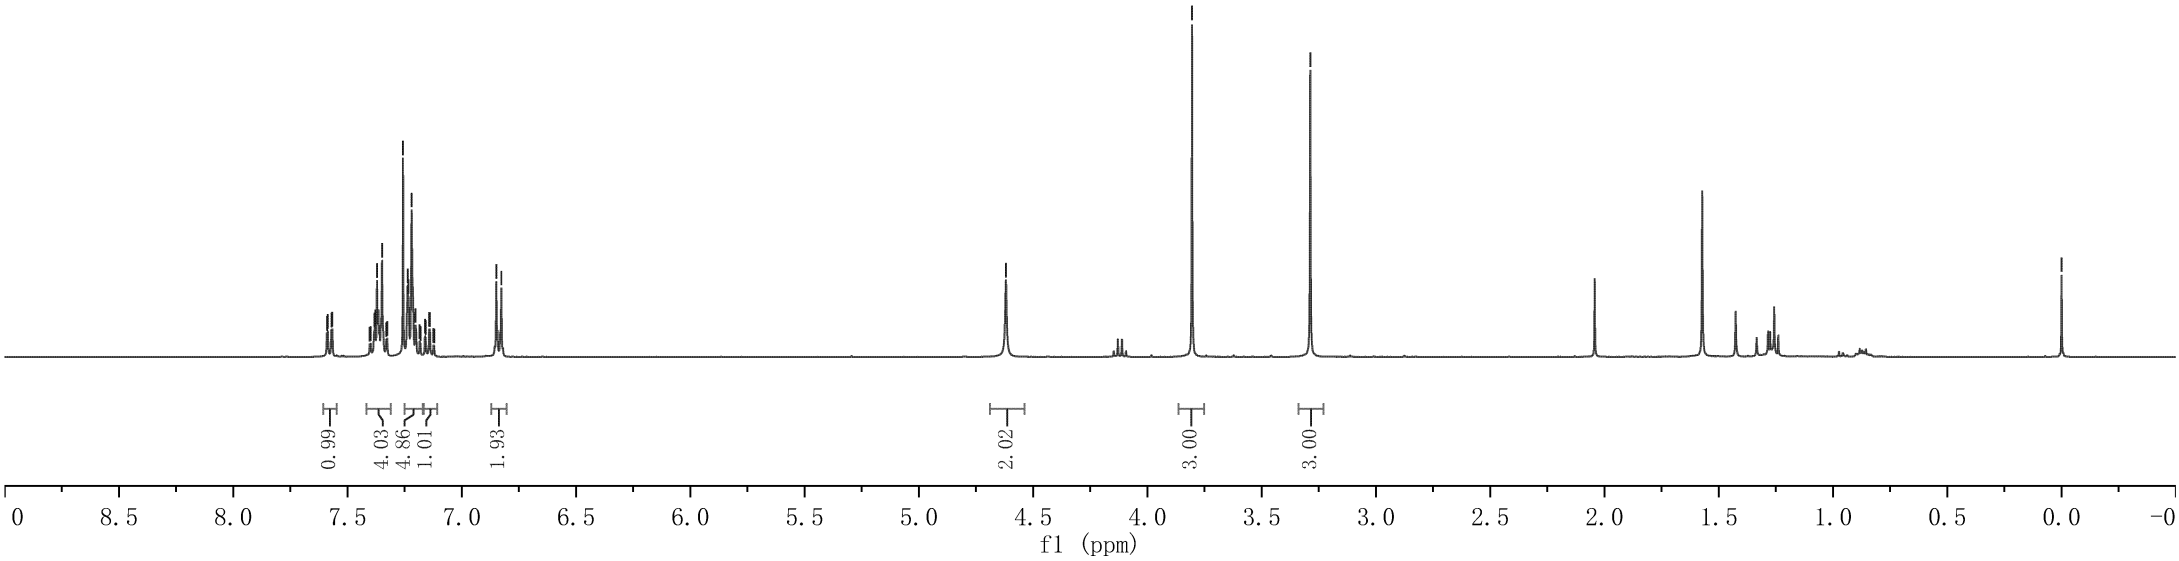

| Parameter                | Value               |
|--------------------------|---------------------|
| 1 Title                  | zjj-12-218-1-C      |
| 2 Origin                 | Bruker BioSpin GmbH |
| 3 Solvent                | CDC13               |
| 4 Temperature            | 300.0               |
| 5 Number of Scans        | 124                 |
| 6 Acquisition Time       | 1.3631              |
| 7 Acquisition Date       | 2021-11-07T20:31:12 |
| 8 Spectrometer Frequency | 100.61              |
| 9 Spectral Width         | 24038.5             |

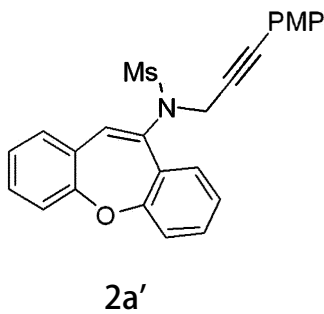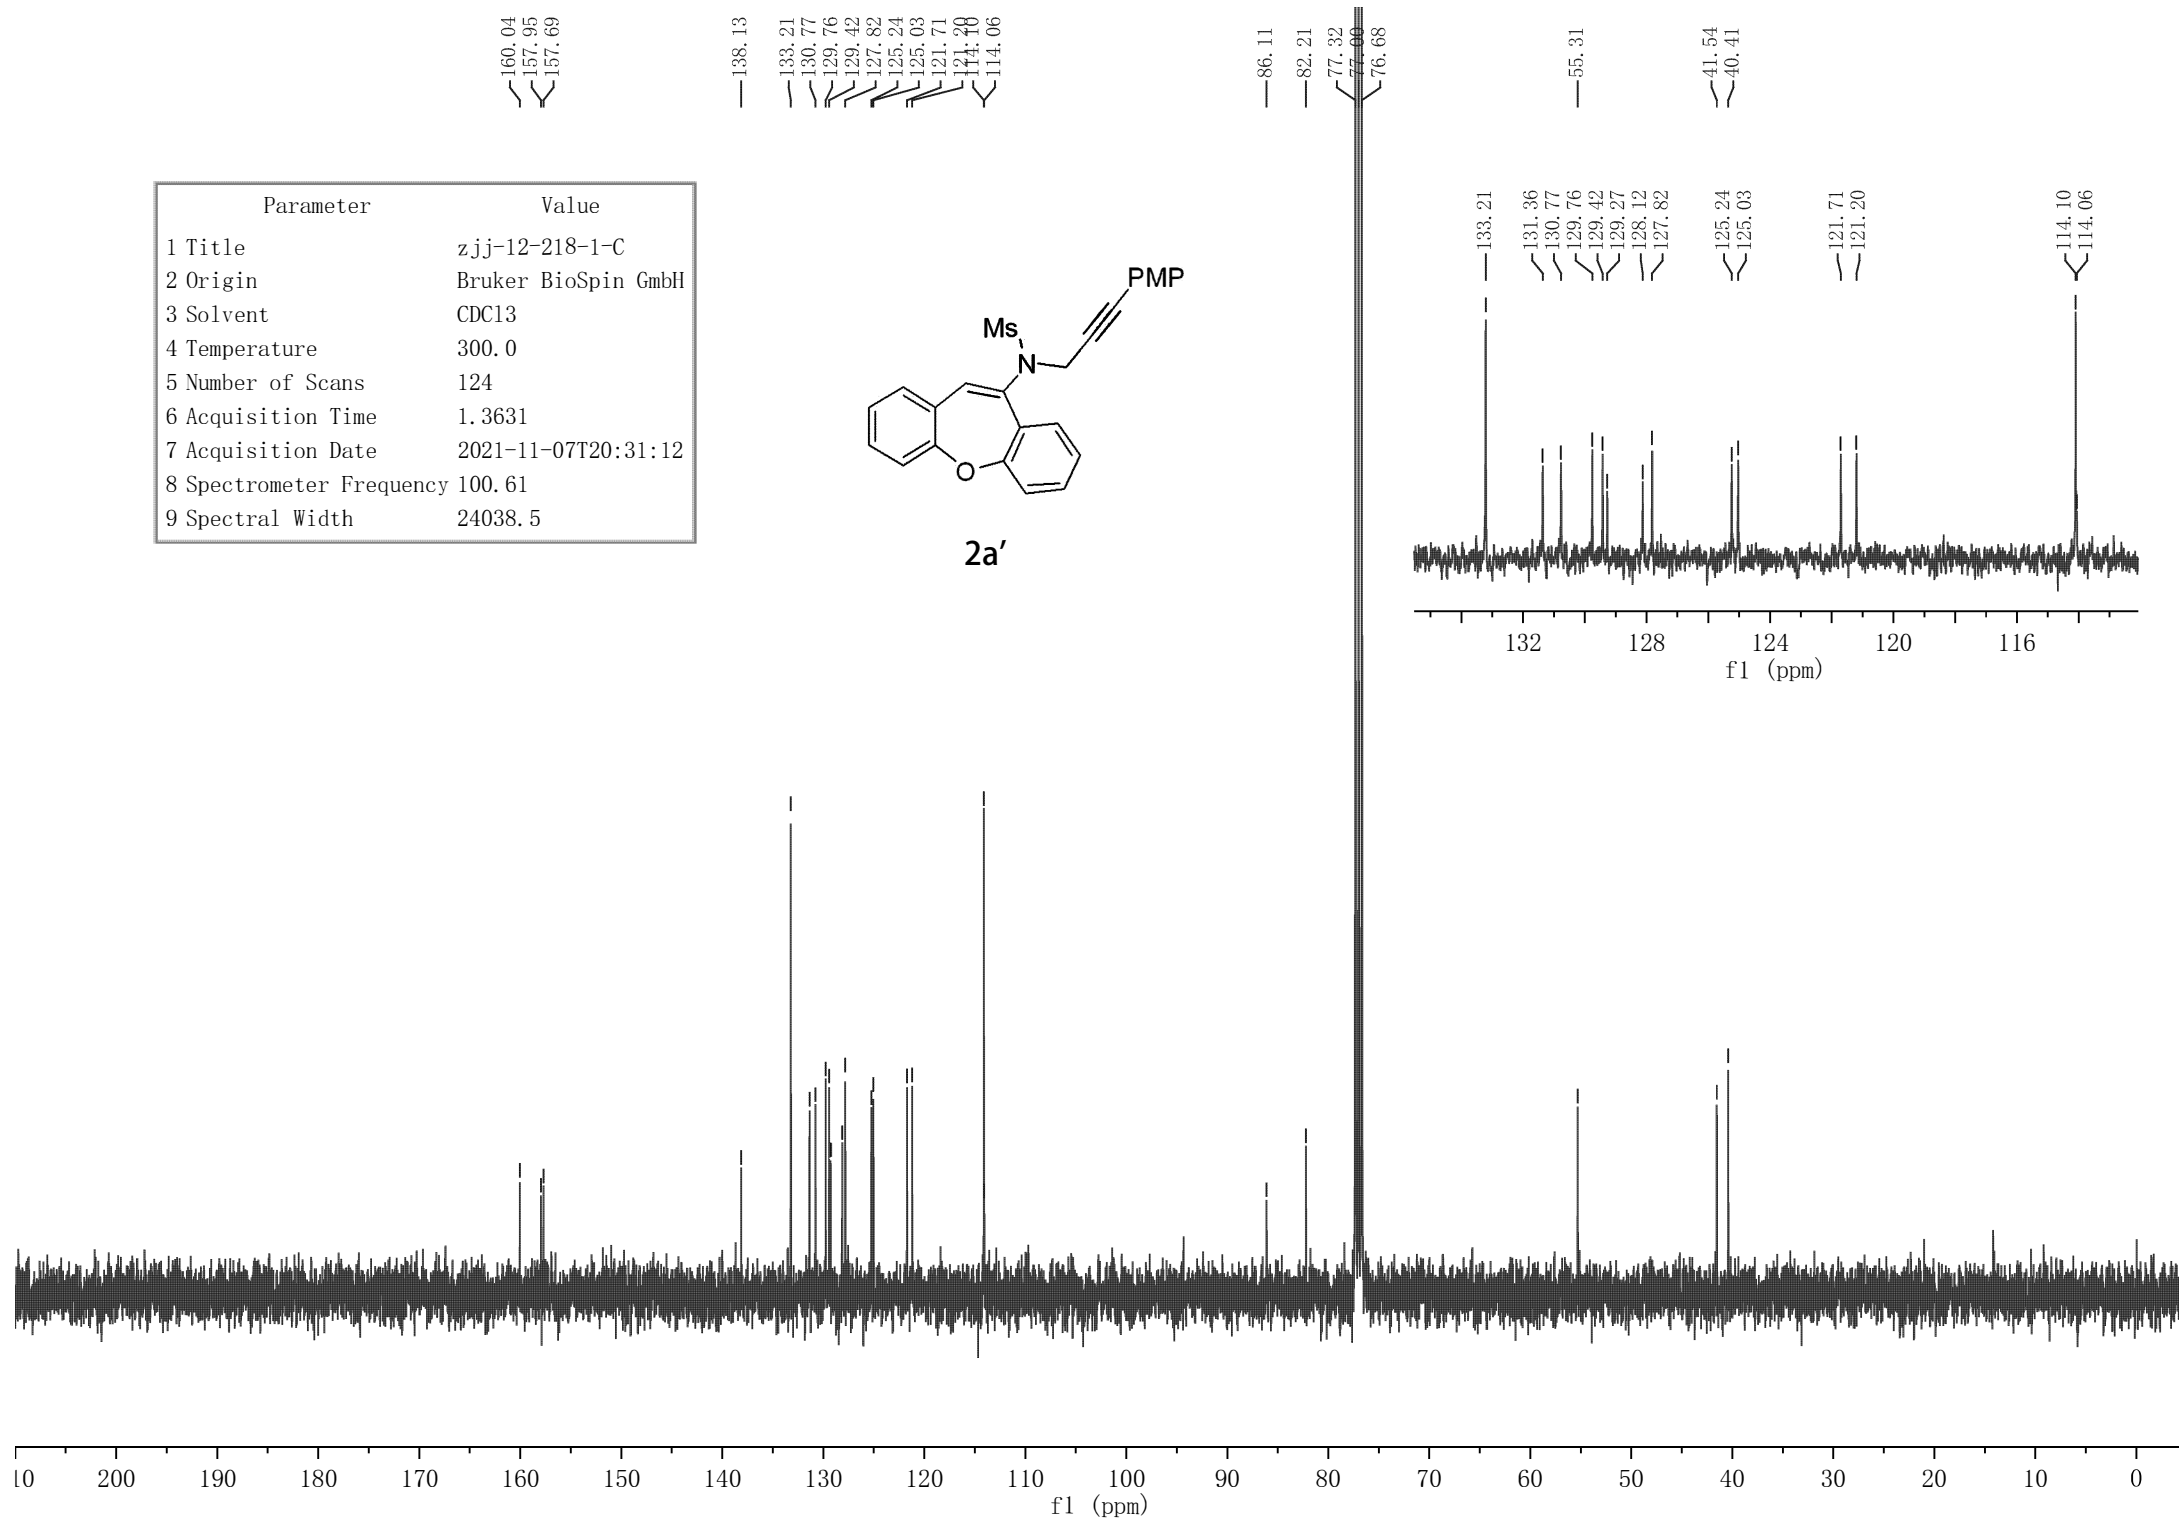



| Parameter                | Value               |
|--------------------------|---------------------|
| 1 Title                  | zjj-12-218-1-C-dept |
| 2 Origin                 | Bruker BioSpin GmbH |
| 3 Solvent                | CDC13               |
| 4 Temperature            | 300.0               |
| 5 Number of Scans        | 61                  |
| 6 Acquisition Time       | 1.3631              |
| 7 Acquisition Date       | 2021-11-07T20:38:54 |
| 8 Spectrometer Frequency | 100.61              |
| 9 Spectral Width         | 24038.5             |

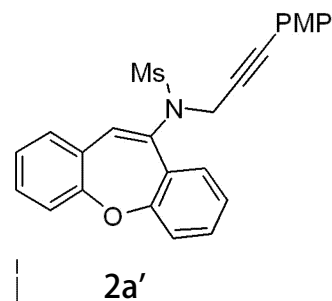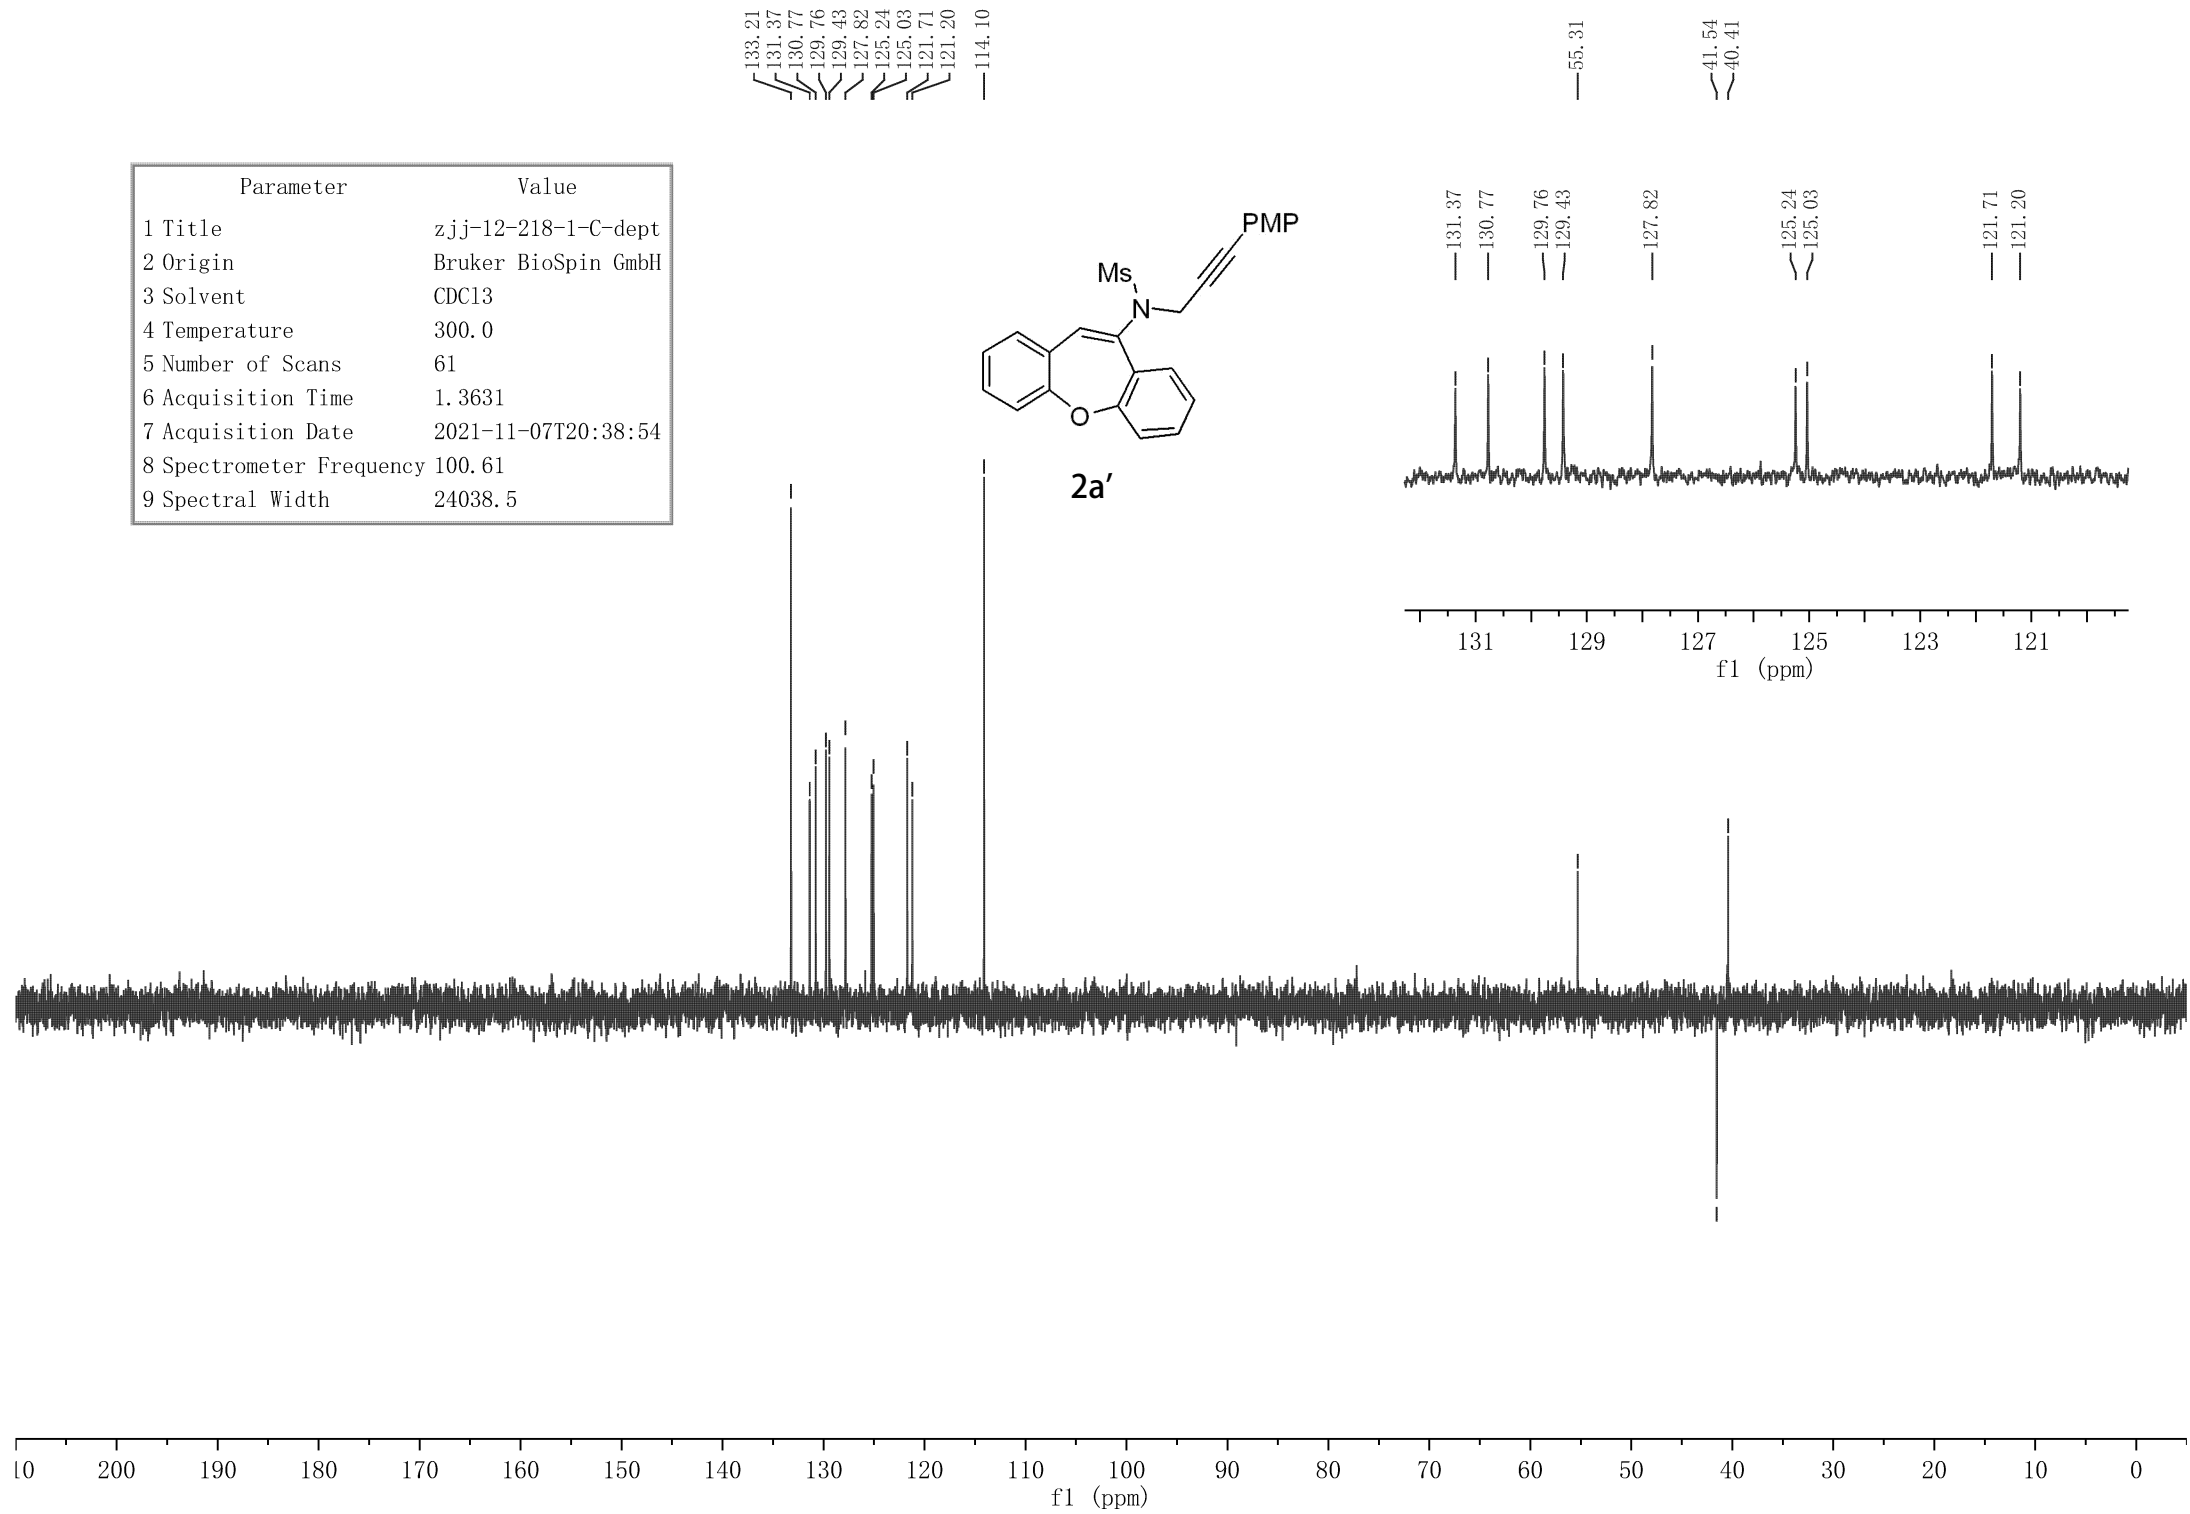

7.374  
7.353  
7.348  
7.329  
7.309  
7.286  
7.267  
7.248  
7.201  
7.179  
7.132  
7.114  
7.096  
7.043  
6.924  
6.905  
6.886  
6.801  
6.779  
6.673  
6.668

3.758

3.229  
3.209  
3.190

1.774  
1.755  
1.736  
1.717  
1.698  
1.679

1.014  
0.995  
0.977

| Parameter                | Value               |
|--------------------------|---------------------|
| 1 Title                  | zjj-14-15-H         |
| 2 Origin                 | Bruker BioSpin GmbH |
| 3 Solvent                | CDC13               |
| 4 Temperature            | 298.0               |
| 5 Number of Scans        | 11                  |
| 6 Acquisition Time       | 4.0894              |
| 7 Acquisition Date       | 2022-04-09T21:16:11 |
| 8 Spectrometer Frequency | 400.13              |
| 9 Spectral Width         | 8012.8              |

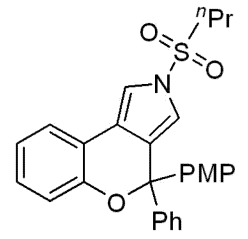

2b

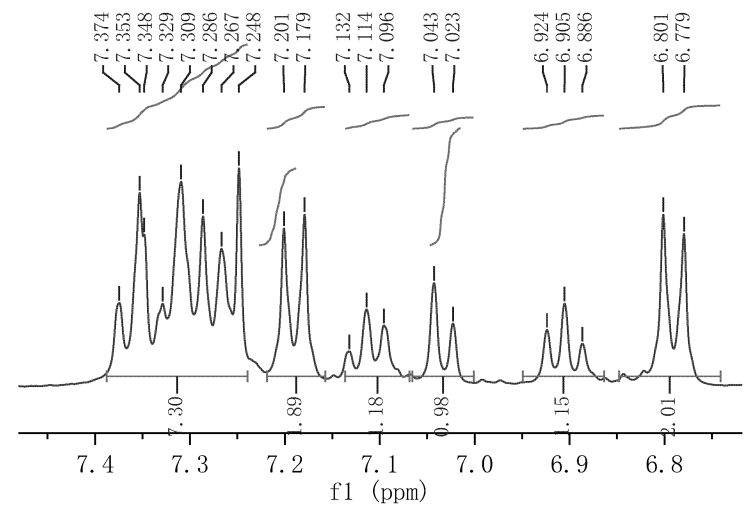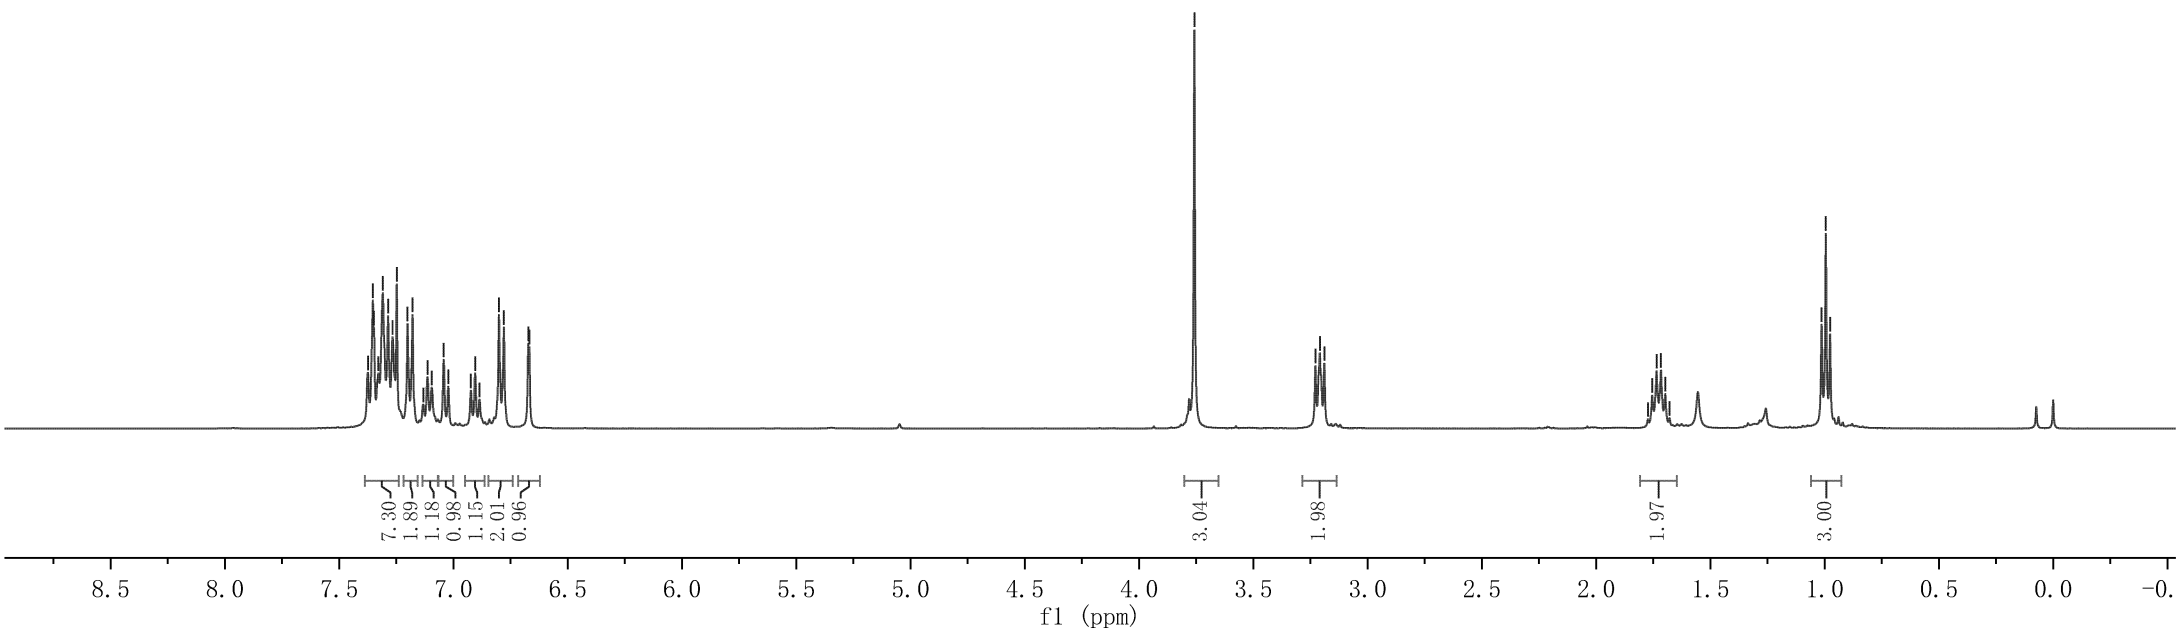

| Parameter                | Value               |
|--------------------------|---------------------|
| 1 Title                  | zjj-14-15-C         |
| 2 Origin                 | Bruker BioSpin GmbH |
| 3 Solvent                | CDC13               |
| 4 Temperature            | 300.0               |
| 5 Number of Scans        | 73                  |
| 6 Acquisition Time       | 1.3631              |
| 7 Acquisition Date       | 2022-04-09T21:40:24 |
| 8 Spectrometer Frequency | 100.61              |
| 9 Spectral Width         | 24038.5             |

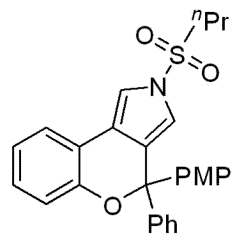

**2b**

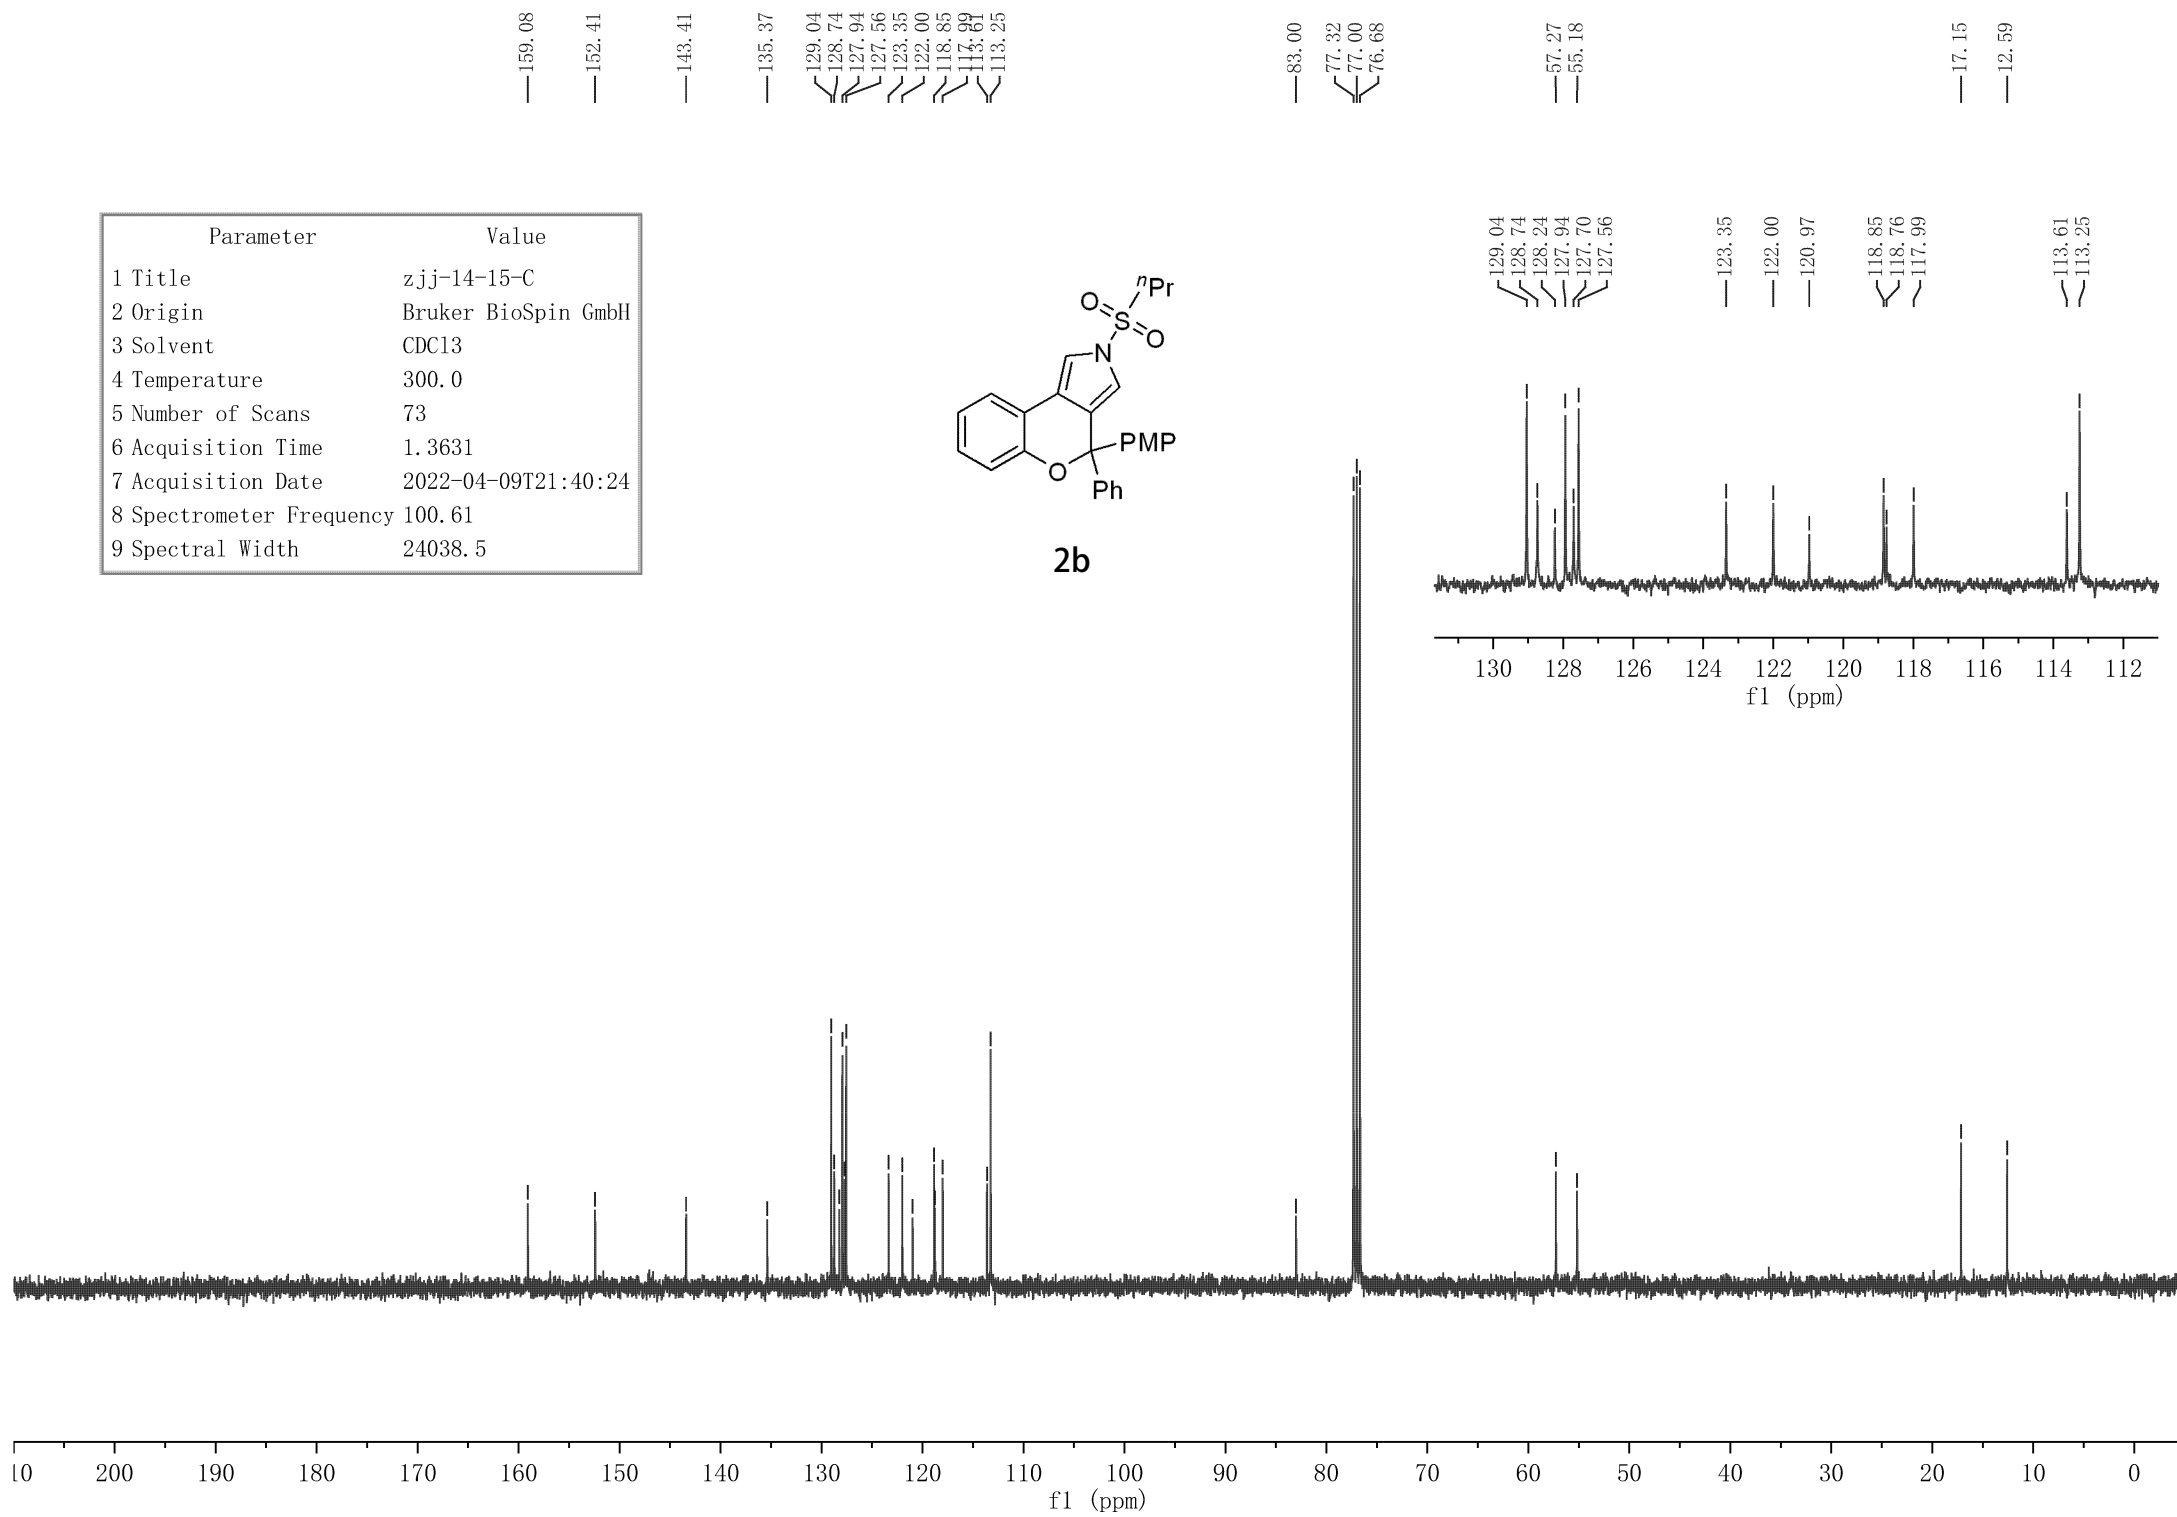

7.377  
7.373  
7.358  
7.354  
7.337  
7.332  
7.325  
7.319  
7.308  
7.305  
7.281  
7.263  
7.254  
7.247  
7.200  
7.178  
7.132  
7.128  
7.112  
7.094  
7.090  
7.043  
7.041  
7.023  
6.922  
6.920  
6.904  
6.901  
6.885  
6.883  
6.800  
6.777  
6.650  
6.645

3.756  
3.454  
3.437  
3.420  
3.402  
3.385  
3.368  
3.351

1.329  
1.312

| Parameter                | Value               |
|--------------------------|---------------------|
| 1 Title                  | zjj-14-16-H         |
| 2 Origin                 | Bruker BioSpin GmbH |
| 3 Solvent                | CDC13               |
| 4 Temperature            | 298.0               |
| 5 Number of Scans        | 12                  |
| 6 Acquisition Time       | 4.0894              |
| 7 Acquisition Date       | 2022-04-09T21:28:06 |
| 8 Spectrometer Frequency | 400.13              |
| 9 Spectral Width         | 8012.8              |

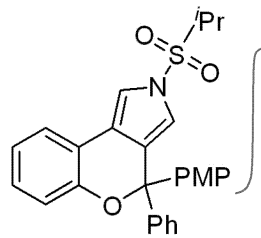

2c

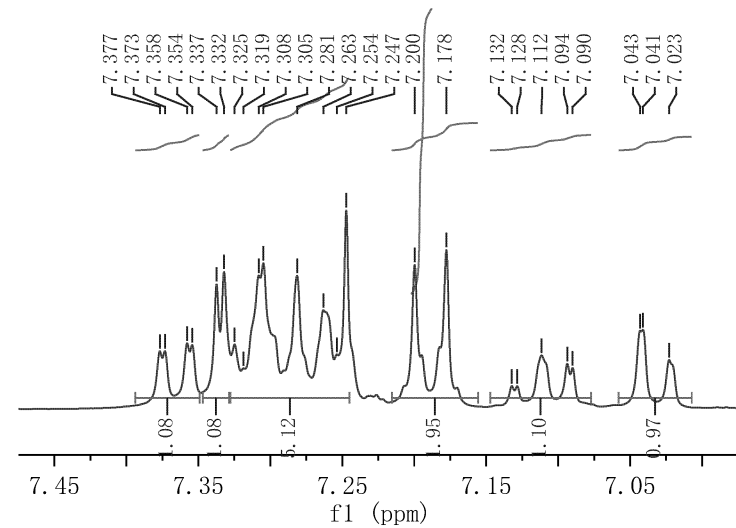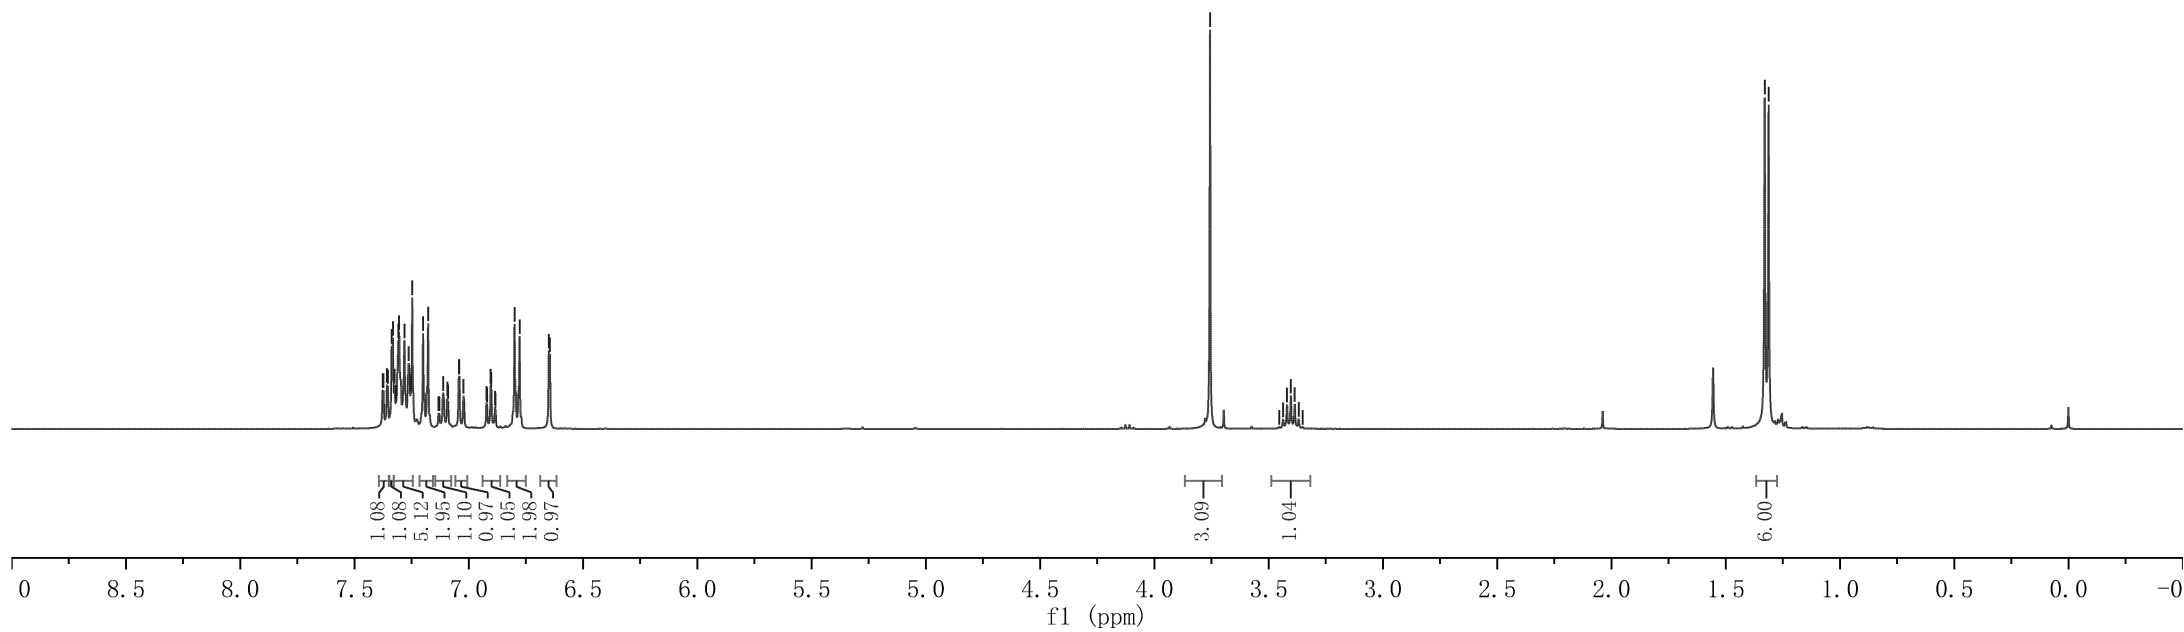

| Parameter                | Value               |
|--------------------------|---------------------|
| 1 Title                  | zjj-14-16-C         |
| 2 Origin                 | Bruker BioSpin GmbH |
| 3 Solvent                | CDC13               |
| 4 Temperature            | 300.0               |
| 5 Number of Scans        | 38                  |
| 6 Acquisition Time       | 1.3631              |
| 7 Acquisition Date       | 2022-04-09T21:35:43 |
| 8 Spectrometer Frequency | 100.61              |
| 9 Spectral Width         | 24038.5             |

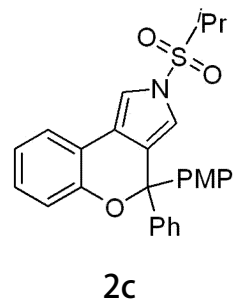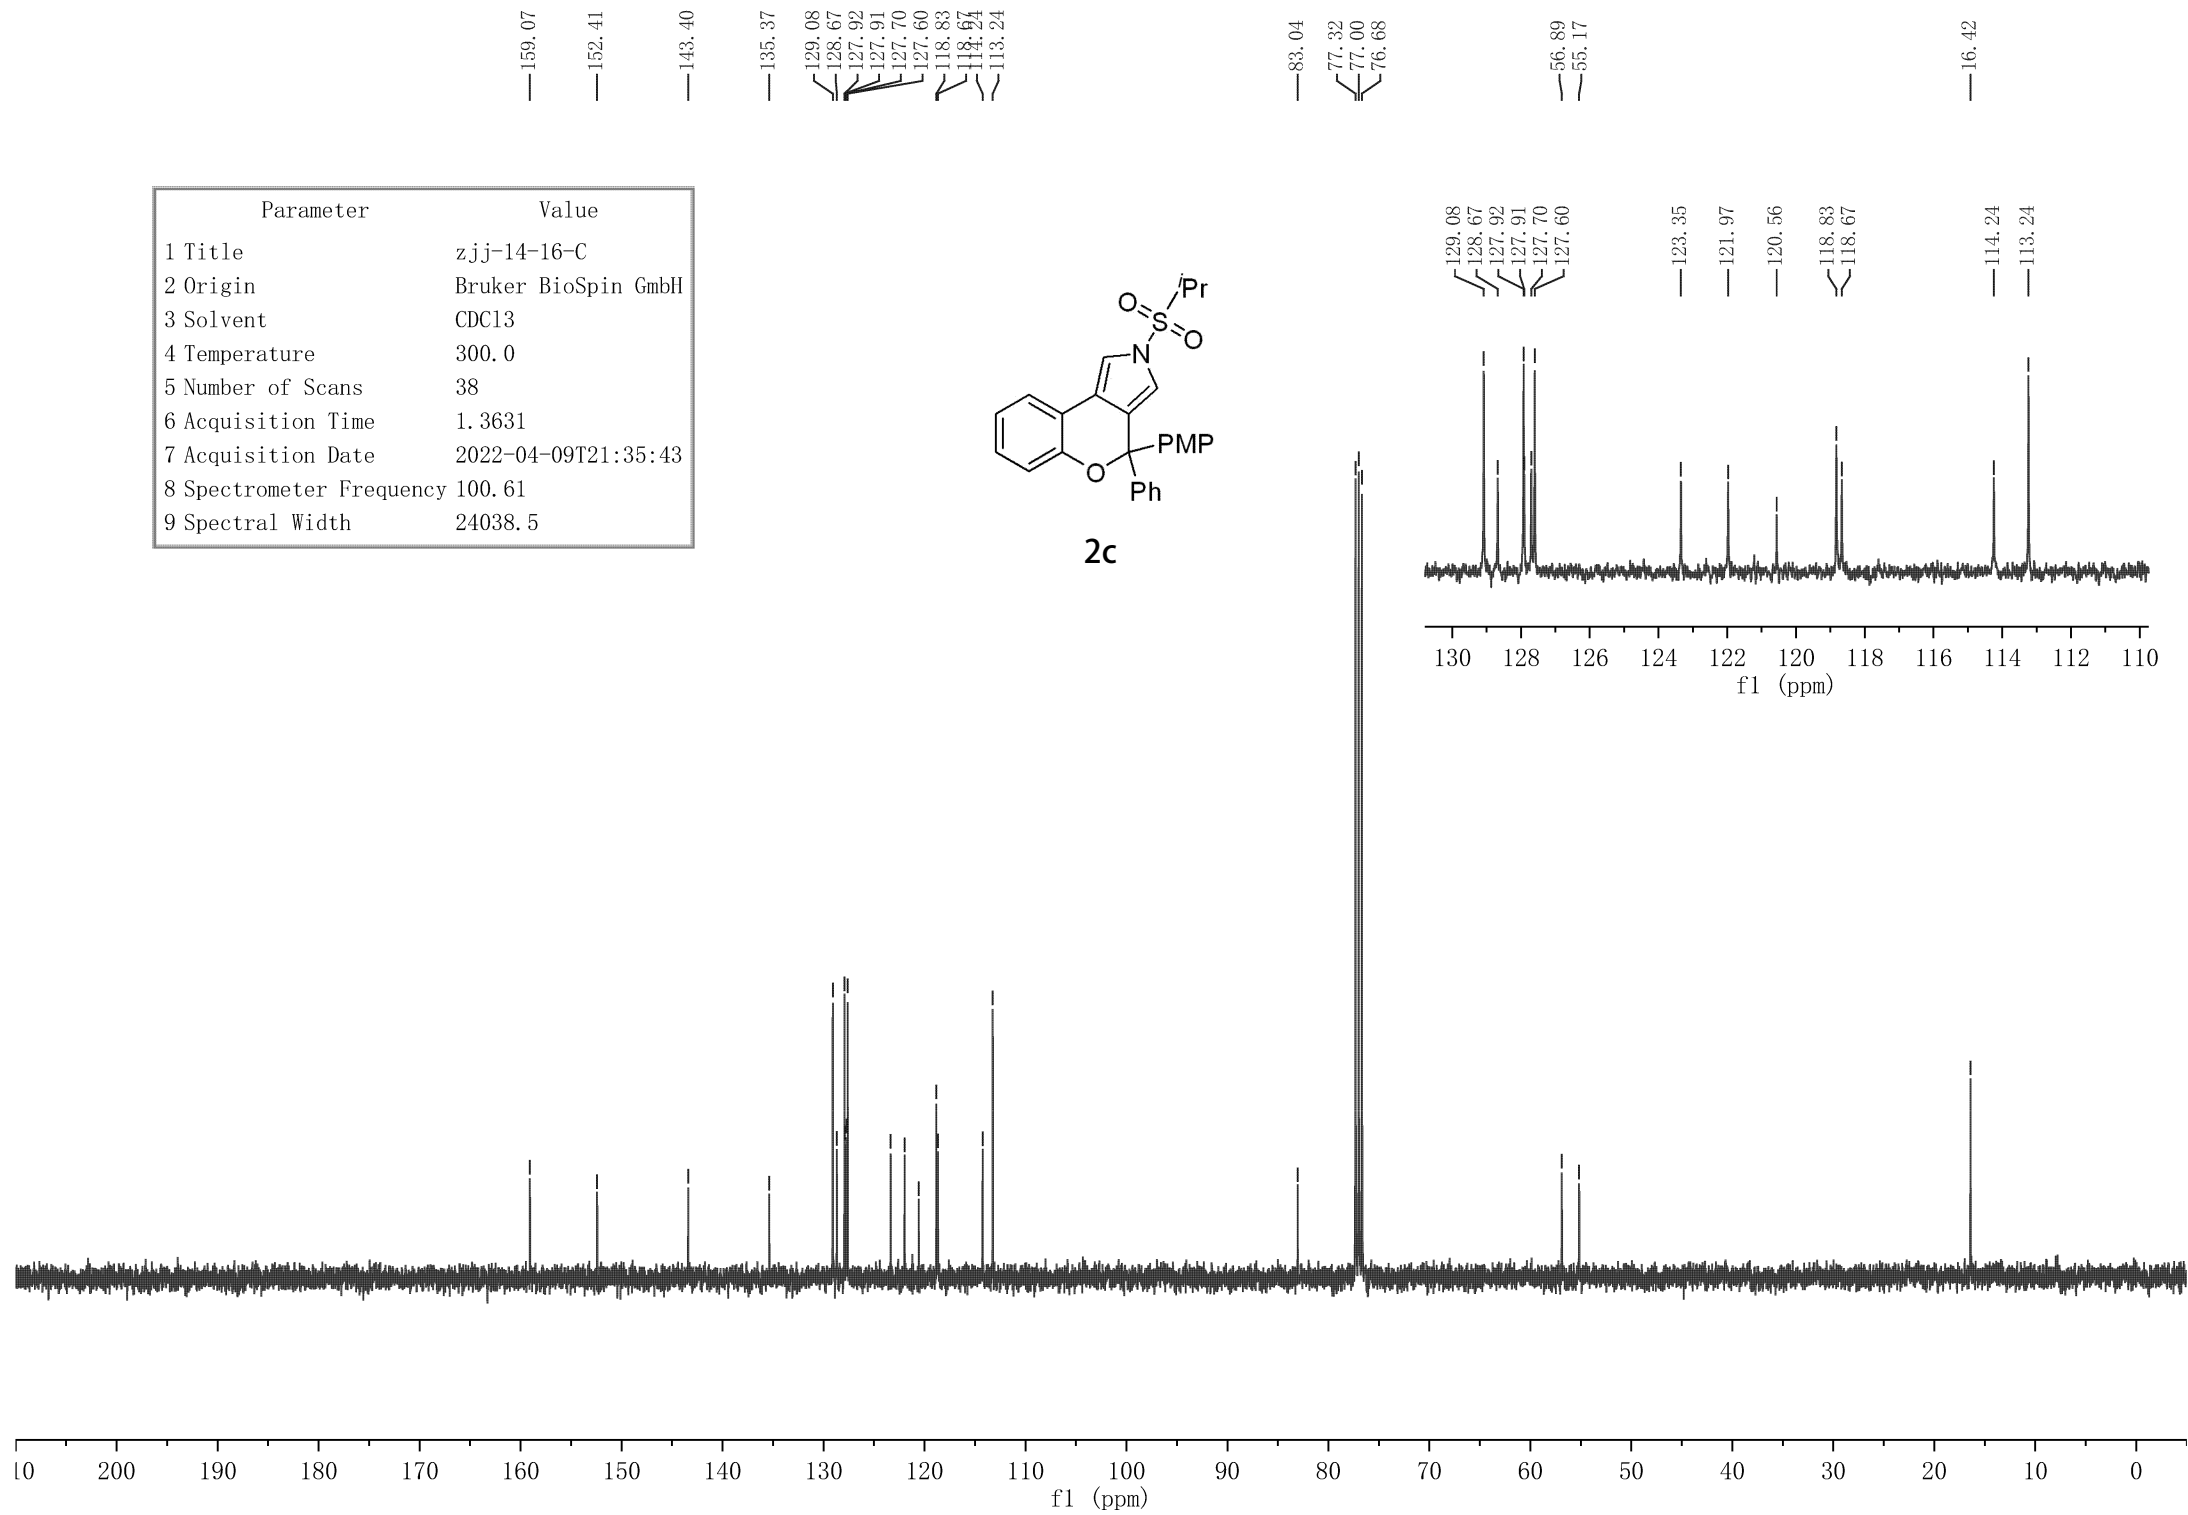

7.703  
7.681  
7.655  
7.632  
7.360  
7.355  
7.341  
7.338  
7.322  
7.319  
7.263  
7.253  
7.245  
7.238  
7.226  
7.218  
7.207  
7.201  
7.115  
7.112  
7.092  
7.070  
7.002  
6.984  
6.897  
6.895  
6.879  
6.876  
6.860  
6.857  
6.769  
6.746  
6.697  
6.692

3.761

| Parameter                | Value               |
|--------------------------|---------------------|
| 1 Title                  | ZJJ-14-Bs-H         |
| 2 Origin                 | Bruker BioSpin GmbH |
| 3 Solvent                | CDCl <sub>3</sub>   |
| 4 Temperature            | 298.0               |
| 5 Number of Scans        | 7                   |
| 6 Acquisition Time       | 4.0894              |
| 7 Acquisition Date       | 2022-07-15T11:36:30 |
| 8 Spectrometer Frequency | 400.13              |
| 9 Spectral Width         | 8012.8              |

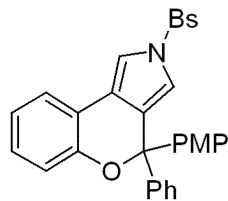

2d

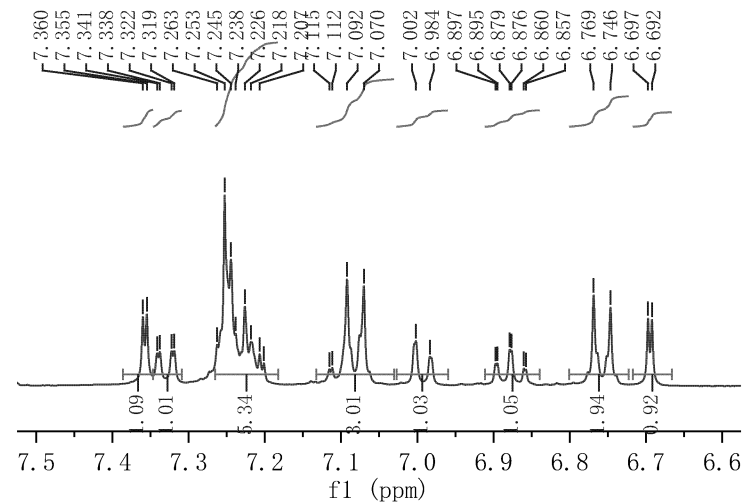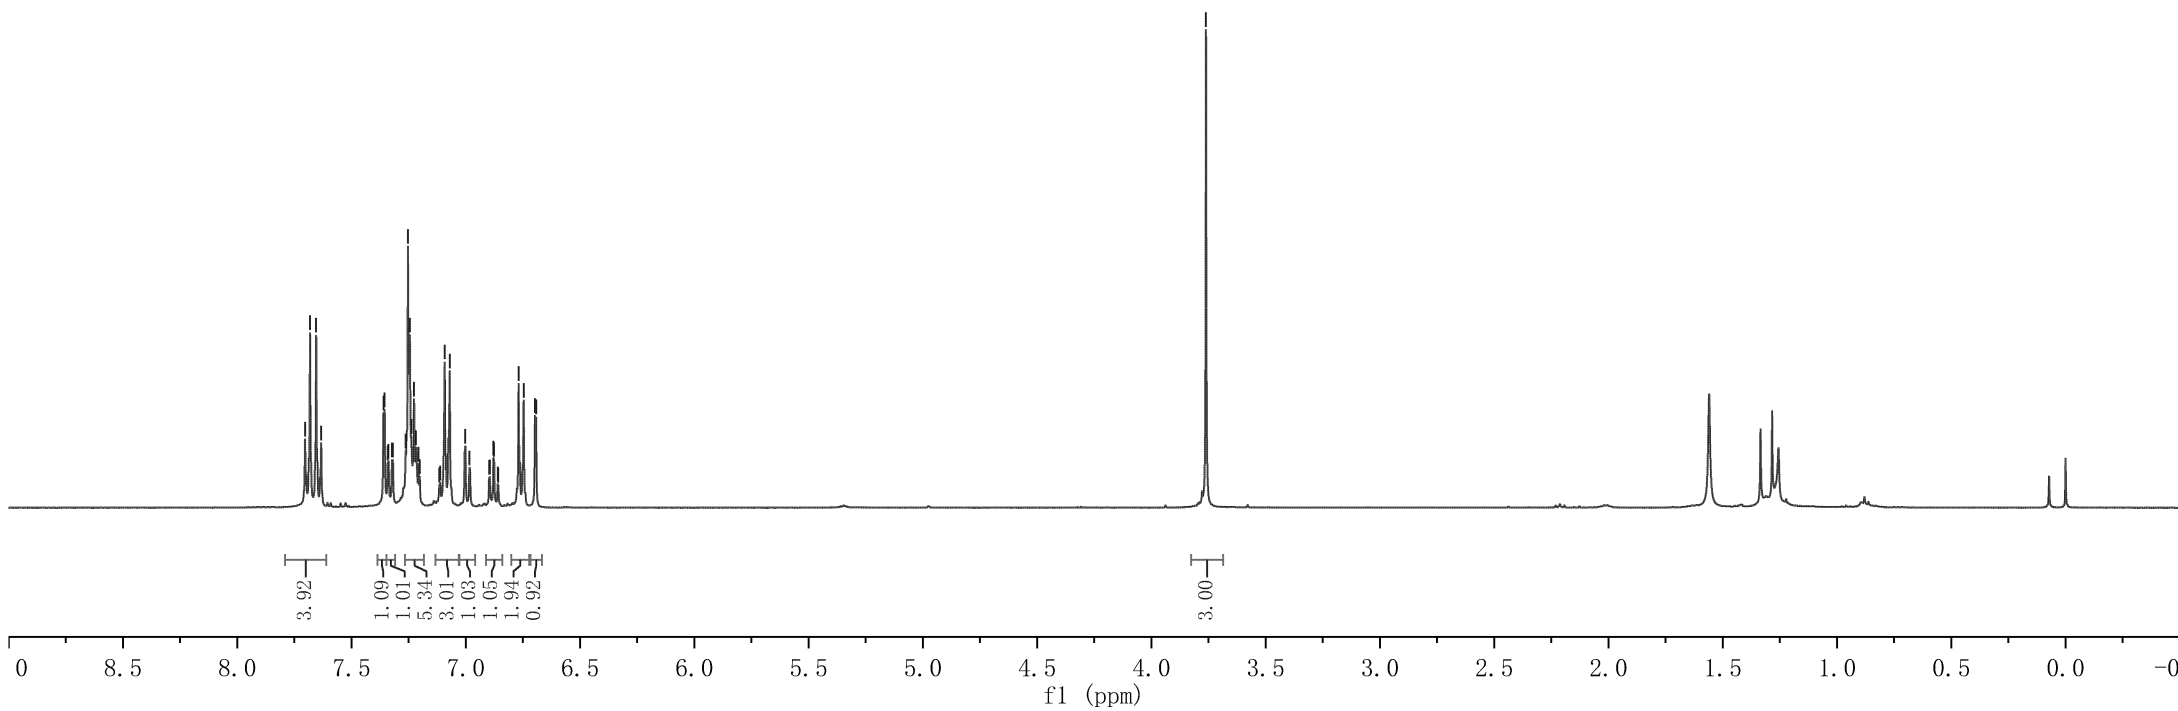

| Parameter                | Value               |
|--------------------------|---------------------|
| 1 Title                  | zjj-14-Bs-C         |
| 2 Origin                 | Bruker BioSpin GmbH |
| 3 Solvent                | CDC13               |
| 4 Temperature            | 300.0               |
| 5 Number of Scans        | 184                 |
| 6 Acquisition Time       | 1.3631              |
| 7 Acquisition Date       | 2022-07-18T09:56:12 |
| 8 Spectrometer Frequency | 100.61              |
| 9 Spectral Width         | 24038.5             |

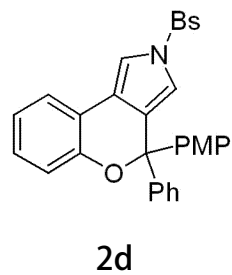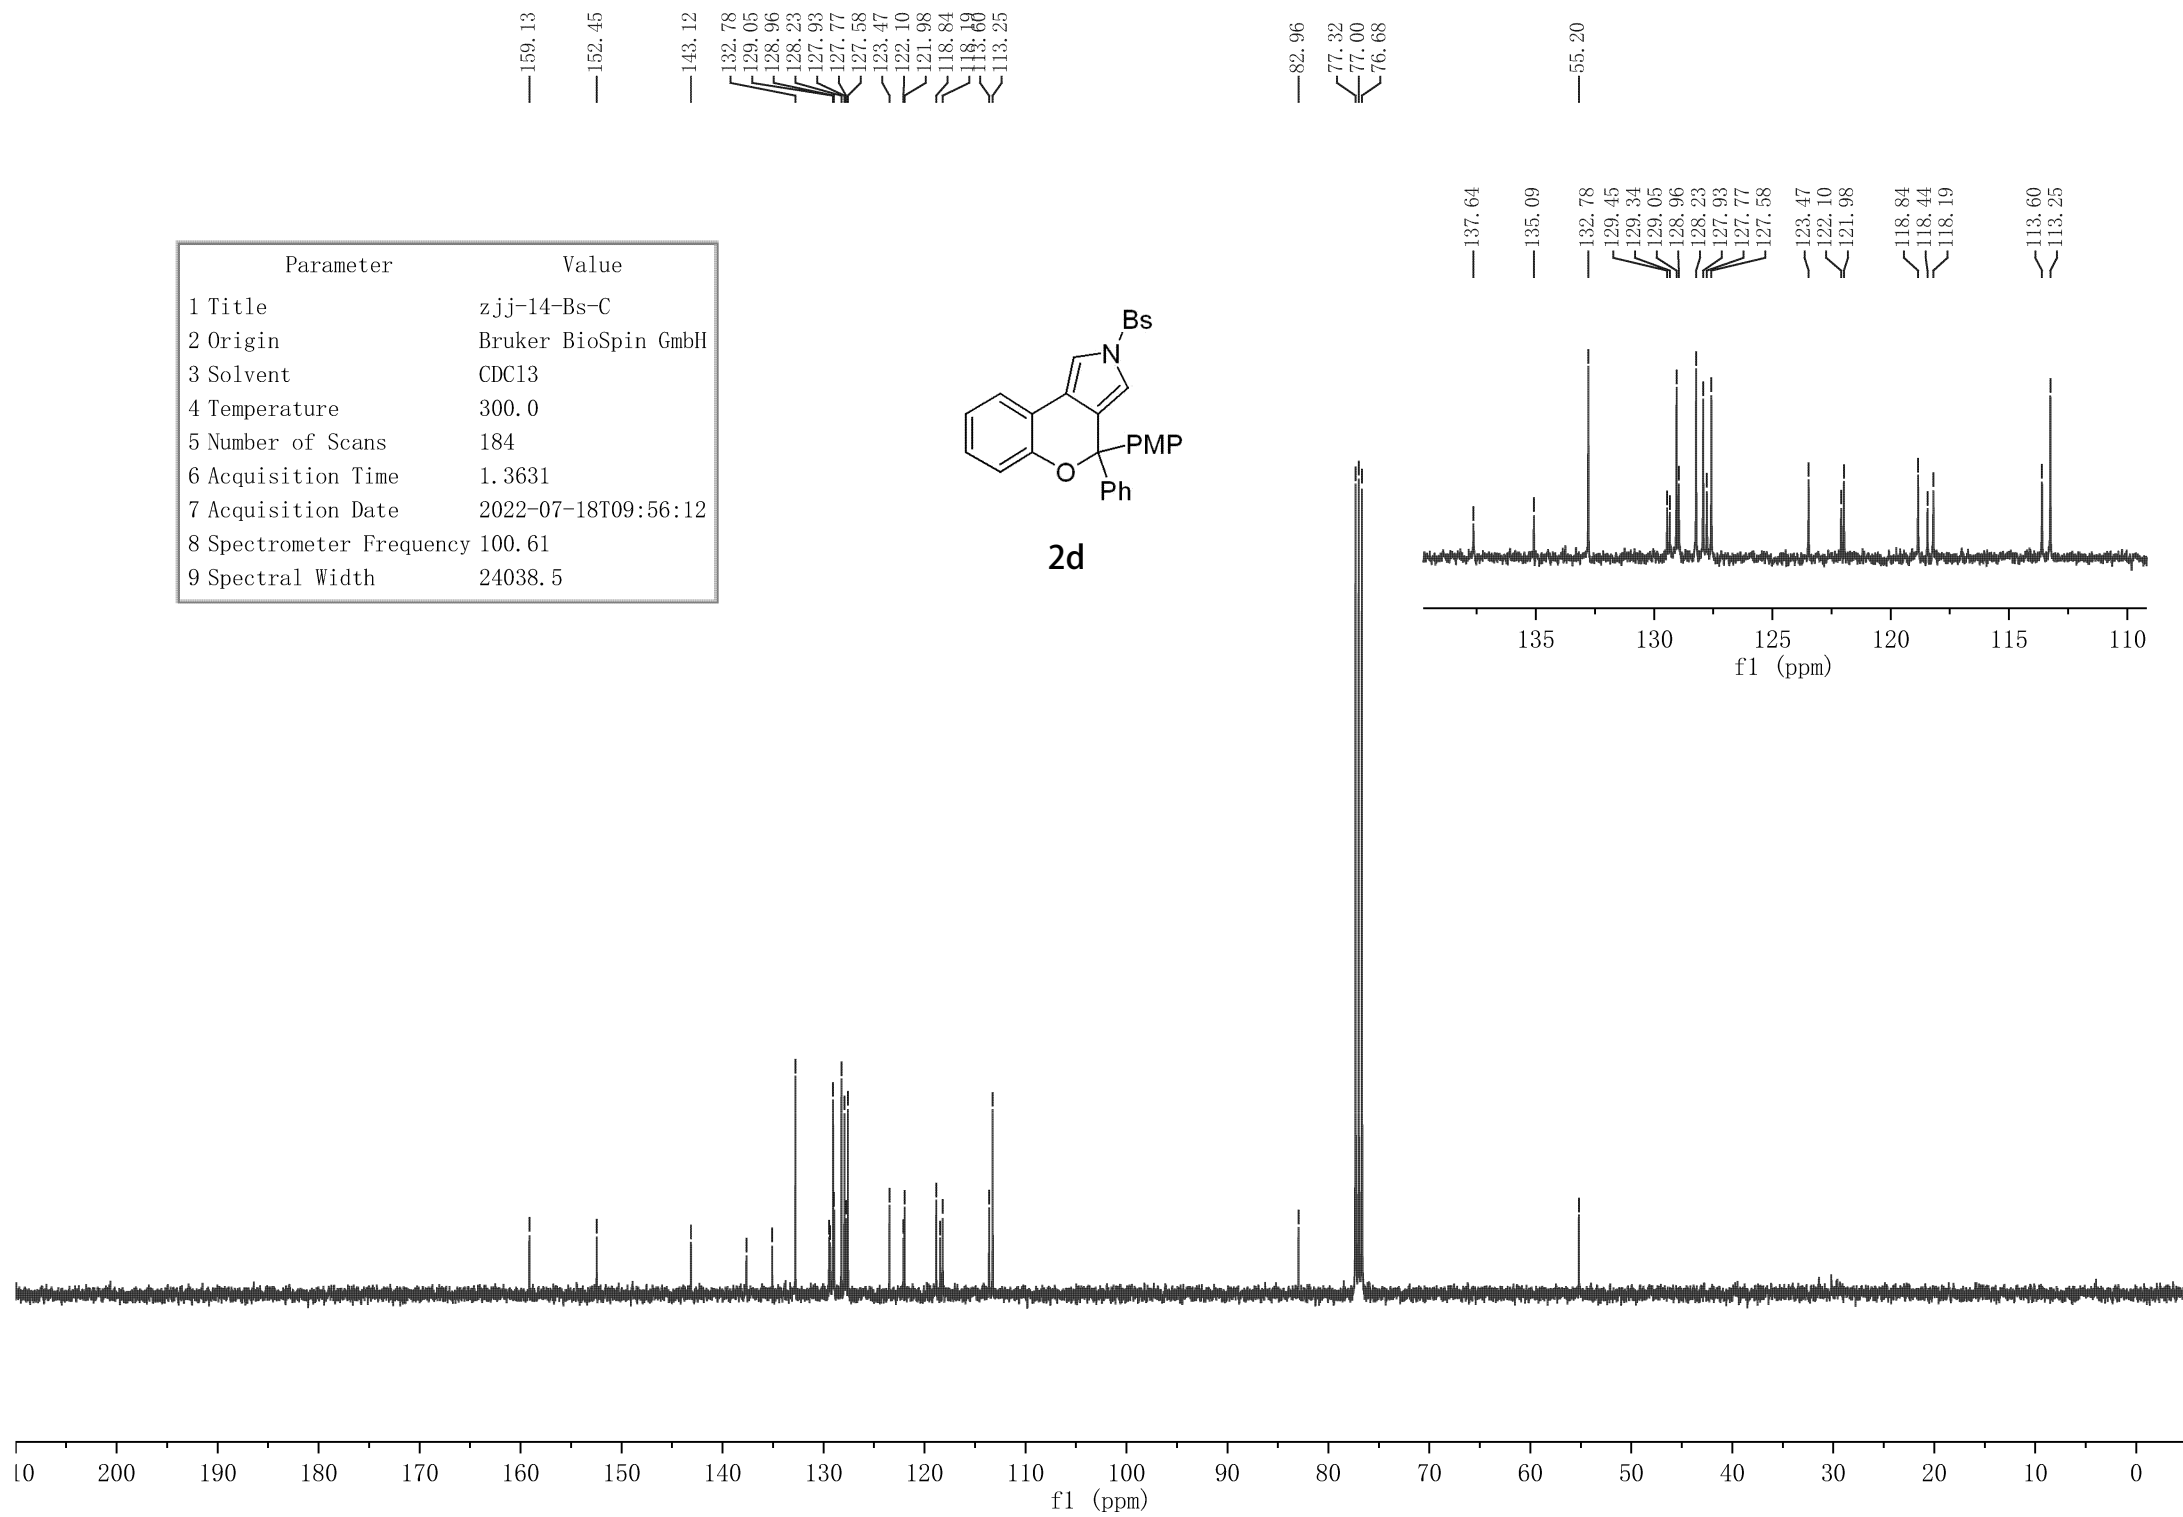

8.297  
8.275  
7.990  
7.969  
7.386  
7.383  
7.331  
7.313  
7.233  
7.098  
7.076  
6.999  
6.979  
6.878  
6.860  
6.841  
6.754  
6.733

3.730

| Parameter                | Value               |
|--------------------------|---------------------|
| 1 Title                  | ZJJ-14-2-H          |
| 2 Origin                 |                     |
| 3 Solvent                | CDCl3               |
| 4 Temperature            | 296.6               |
| 5 Number of Scans        | 16                  |
| 6 Acquisition Time       | 4.0002              |
| 7 Acquisition Date       | 2022-04-04T14:31:42 |
| 8 Spectrometer Frequency | 399.93              |
| 9 Spectral Width         | 8012.0              |

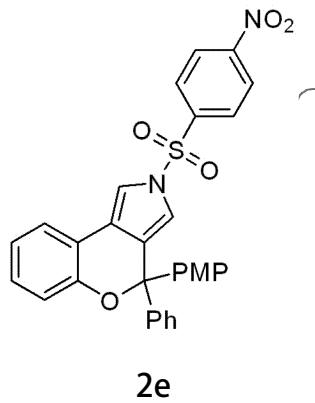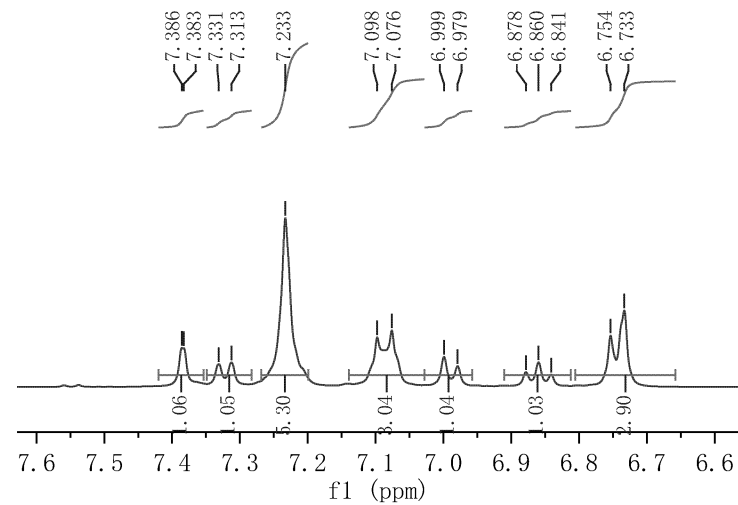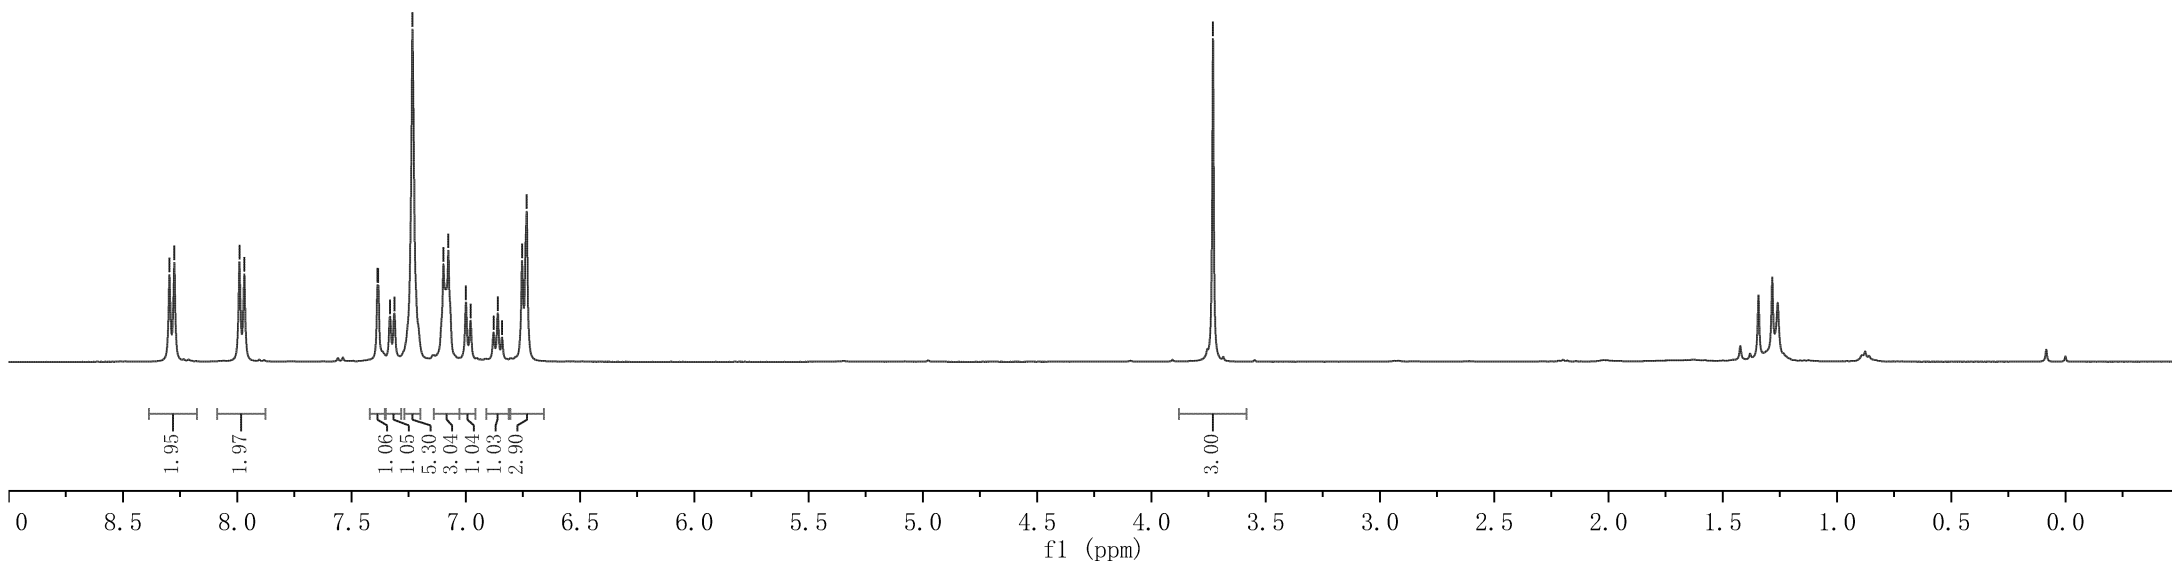



| Parameter                | Value               |
|--------------------------|---------------------|
| 1 Title                  | ZJJ-14-2-C          |
| 2 Origin                 |                     |
| 3 Solvent                | CDC13               |
| 4 Temperature            | 296.9               |
| 5 Number of Scans        | 300                 |
| 6 Acquisition Time       | 1.0000              |
| 7 Acquisition Date       | 2022-04-04T14:43:56 |
| 8 Spectrometer Frequency | 100.56              |
| 9 Spectral Width         | 26041.0             |

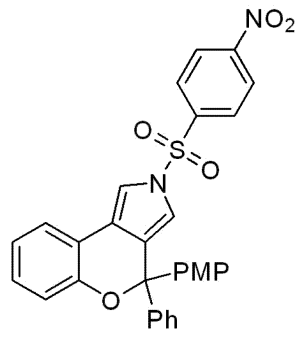

2e

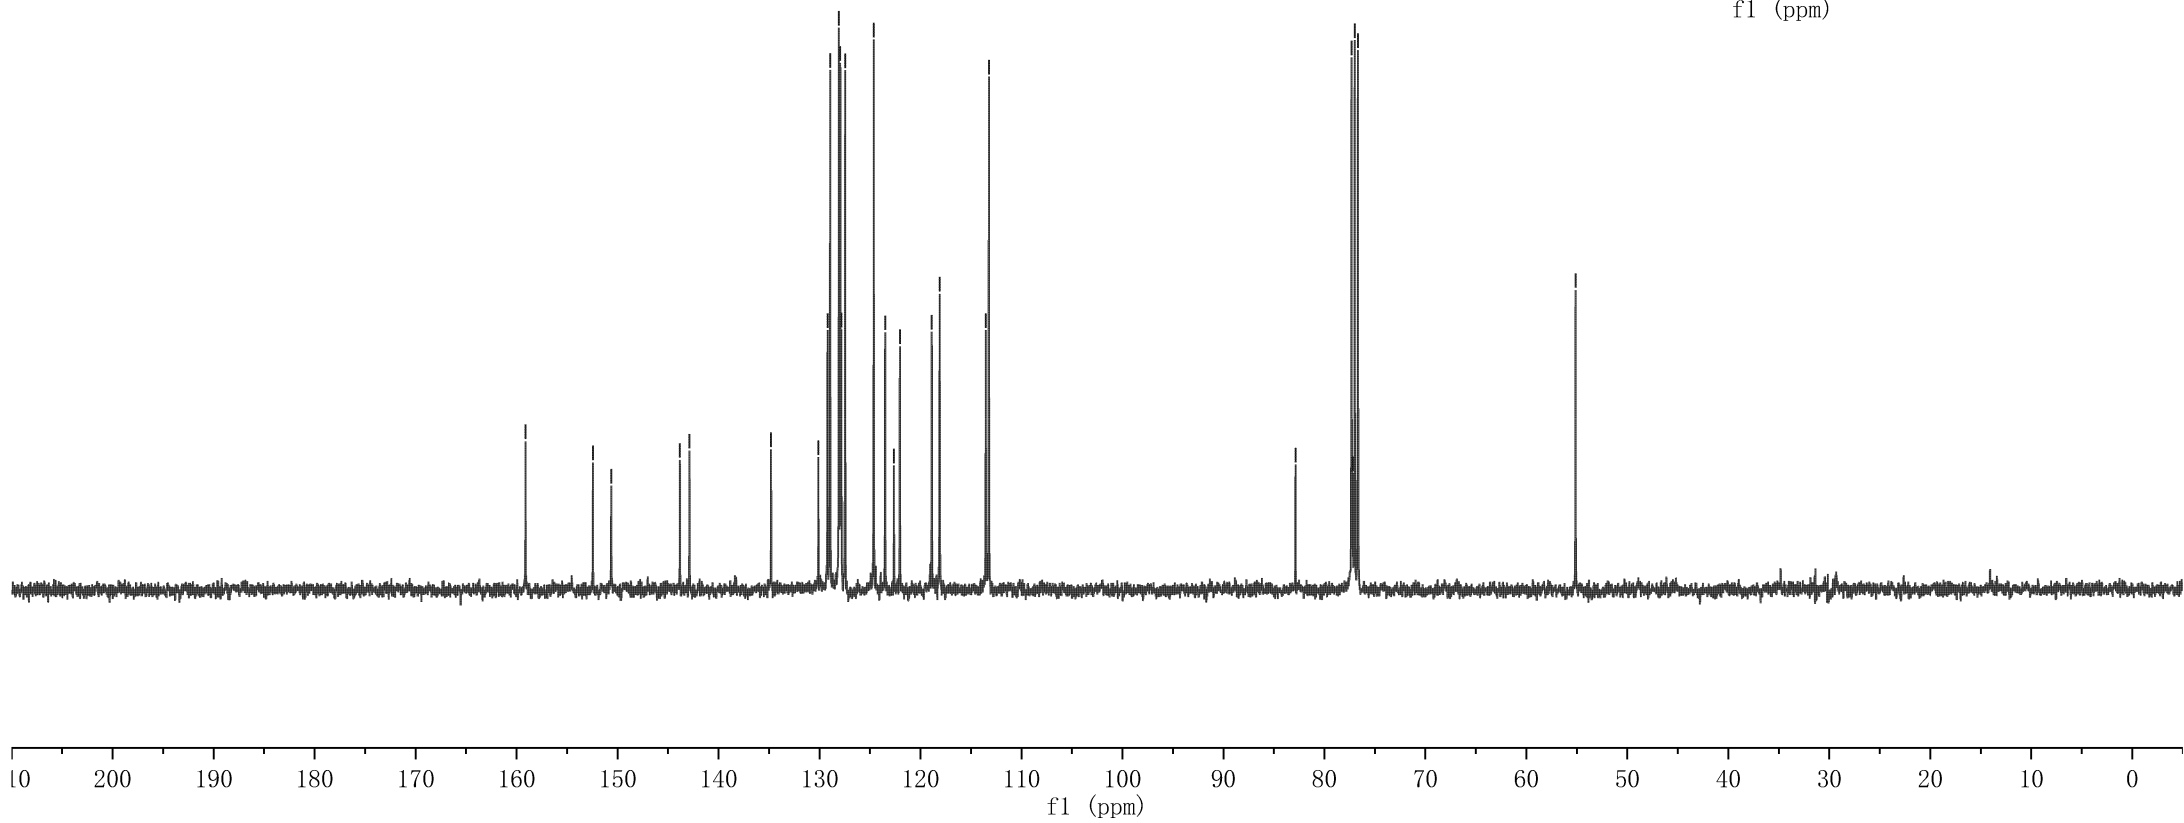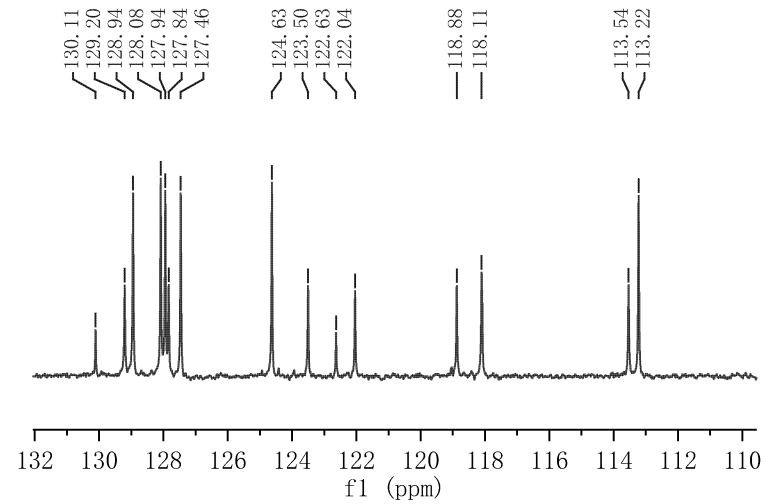

7.962  
7.941  
7.769  
7.748  
7.392  
7.387  
7.343  
7.324  
7.235  
7.091  
7.069  
7.006  
6.986  
6.888  
6.870  
6.851  
6.755  
6.733

| Parameter                | Value               |
|--------------------------|---------------------|
| 1 Title                  | zjj-14-12-H         |
| 2 Origin                 | Bruker BioSpin GmbH |
| 3 Solvent                | CDC13               |
| 4 Temperature            | 298.0               |
| 5 Number of Scans        | 10                  |
| 6 Acquisition Time       | 4.0894              |
| 7 Acquisition Date       | 2022-04-08T14:56:46 |
| 8 Spectrometer Frequency | 400.13              |
| 9 Spectral Width         | 8012.8              |

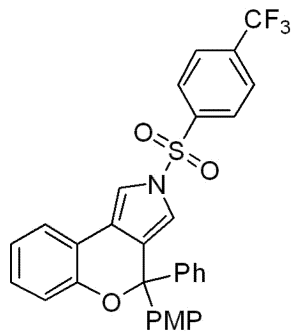

2f

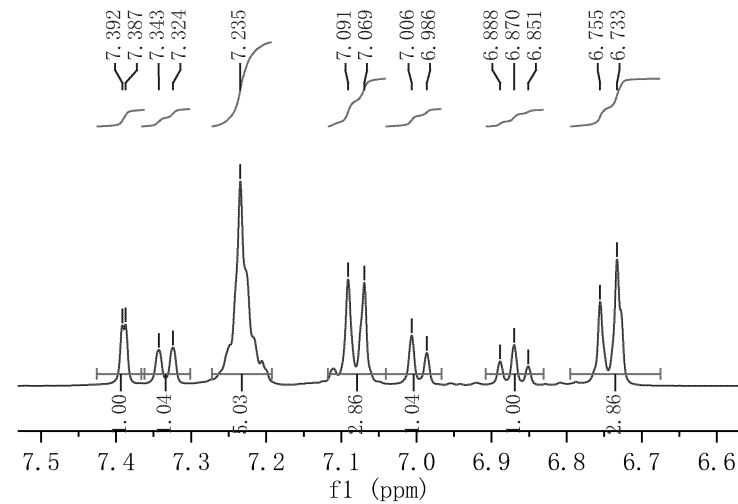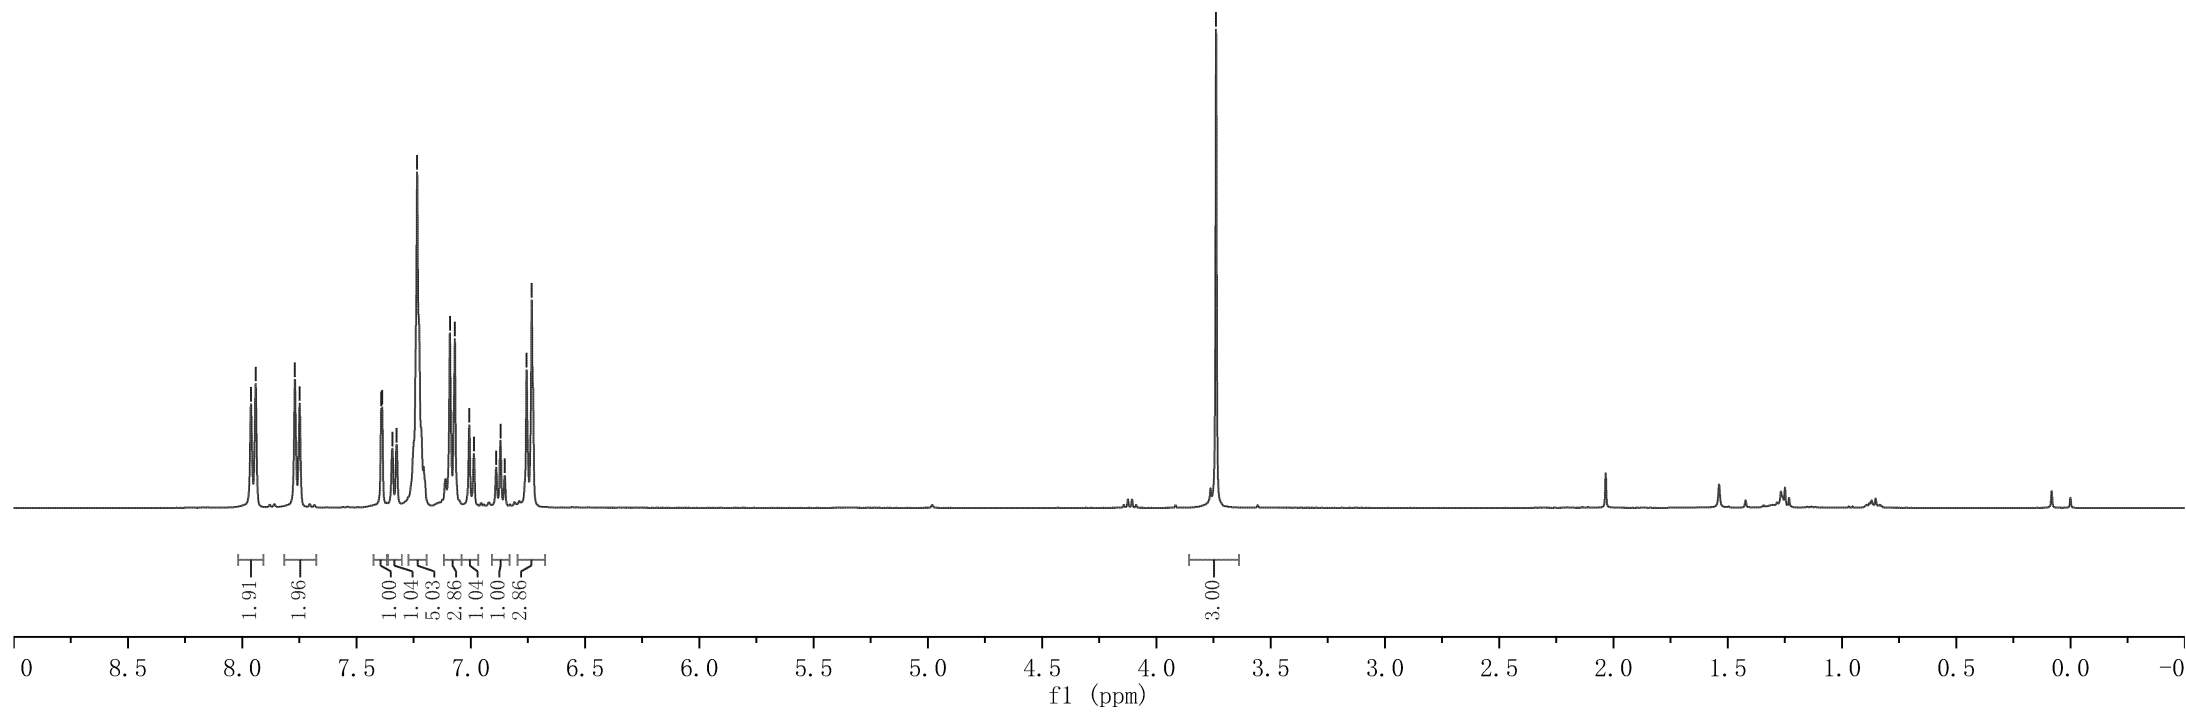

| Parameter                | Value                      |
|--------------------------|----------------------------|
| 1 Title                  | zjj-14-12-CF3Ph02-chanwu-C |
| 2 Origin                 | Bruker BioSpin GmbH        |
| 3 Solvent                | CDC13                      |
| 4 Temperature            | 300.0                      |
| 5 Number of Scans        | 325                        |
| 6 Acquisition Time       | 1.3631                     |
| 7 Acquisition Date       | 2022-04-08T14:58:32        |
| 8 Spectrometer Frequency | 100.61                     |
| 9 Spectral Width         | 24038.5                    |

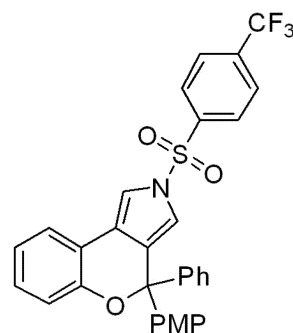

2f

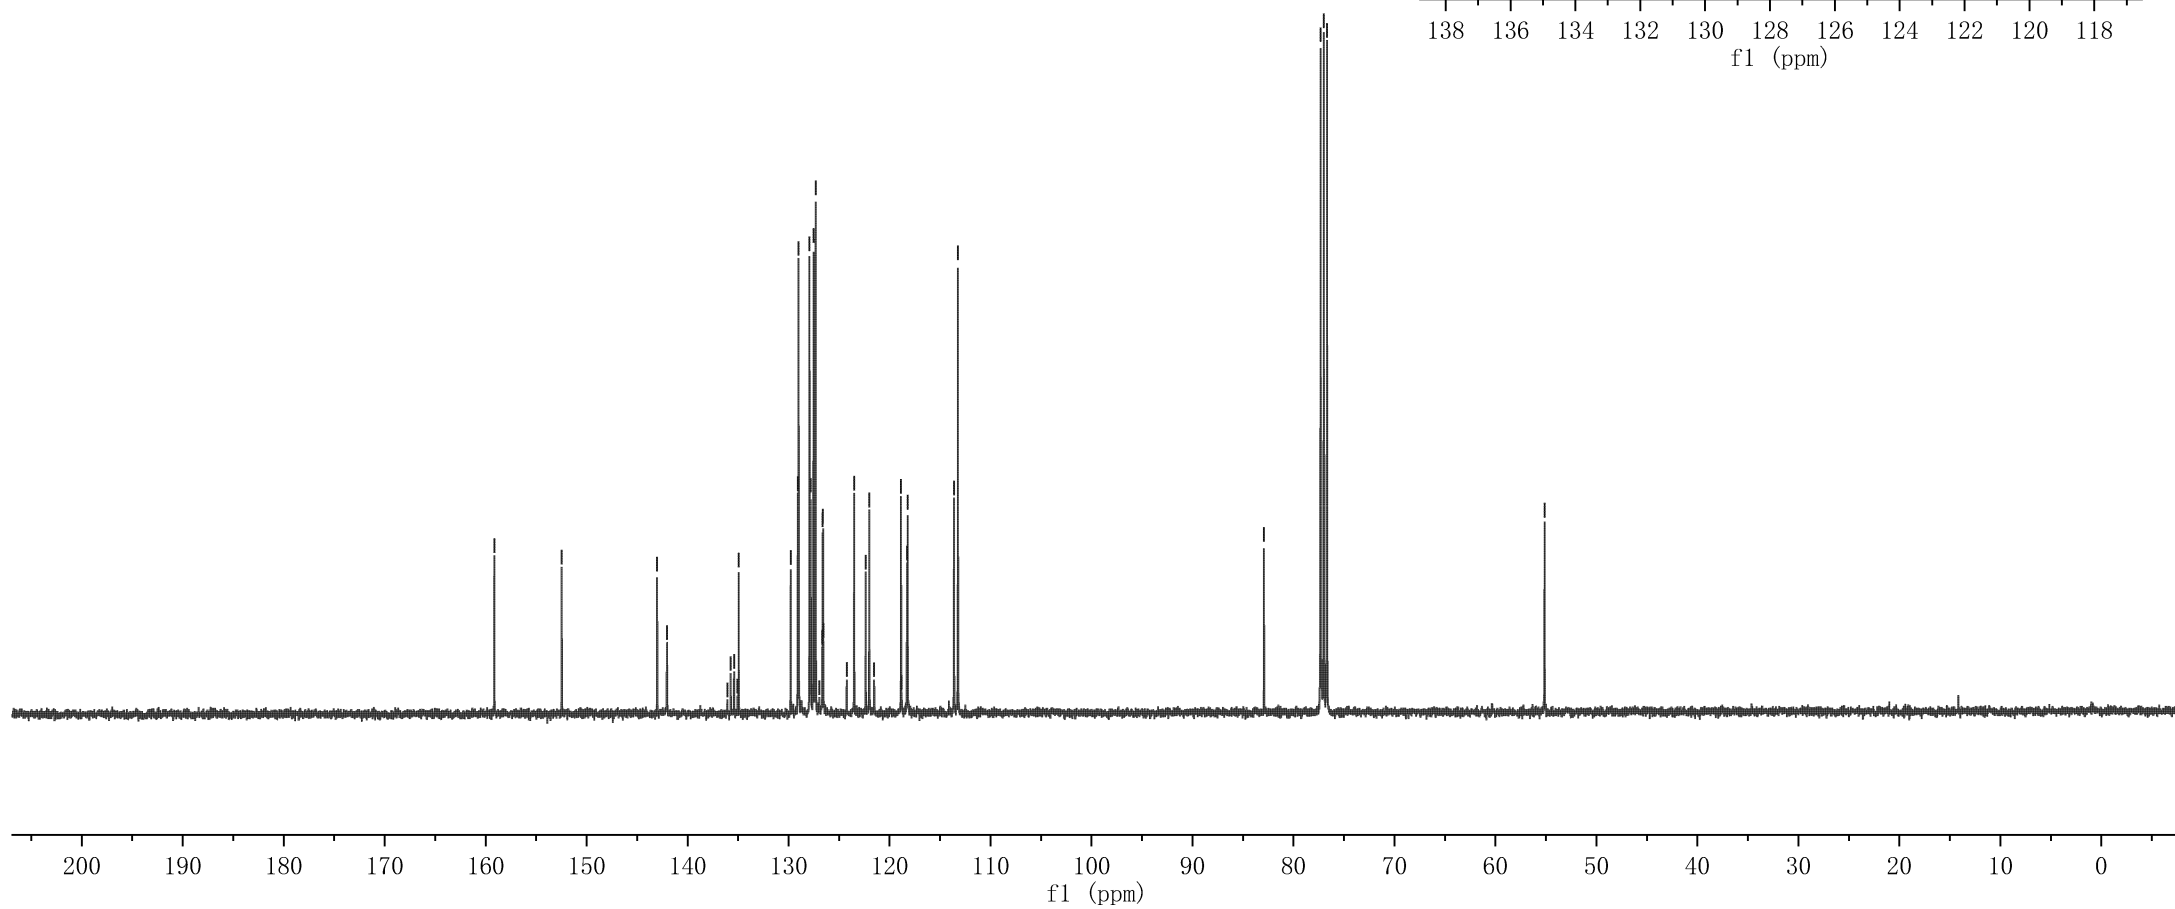

| Parameter                | Value               |
|--------------------------|---------------------|
| 1 Title                  | zjj-14-4-F          |
| 2 Origin                 | Bruker BioSpin GmbH |
| 3 Solvent                | CDCl <sub>3</sub>   |
| 4 Temperature            | 297.3               |
| 5 Number of Scans        | 13                  |
| 6 Acquisition Time       | 0.7340              |
| 7 Acquisition Date       | 2022-04-12T11:37:38 |
| 8 Spectrometer Frequency | 376.31              |
| 9 Spectral Width         | 89285.7             |

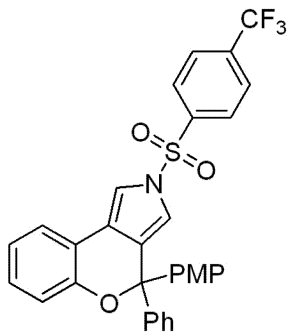

2f

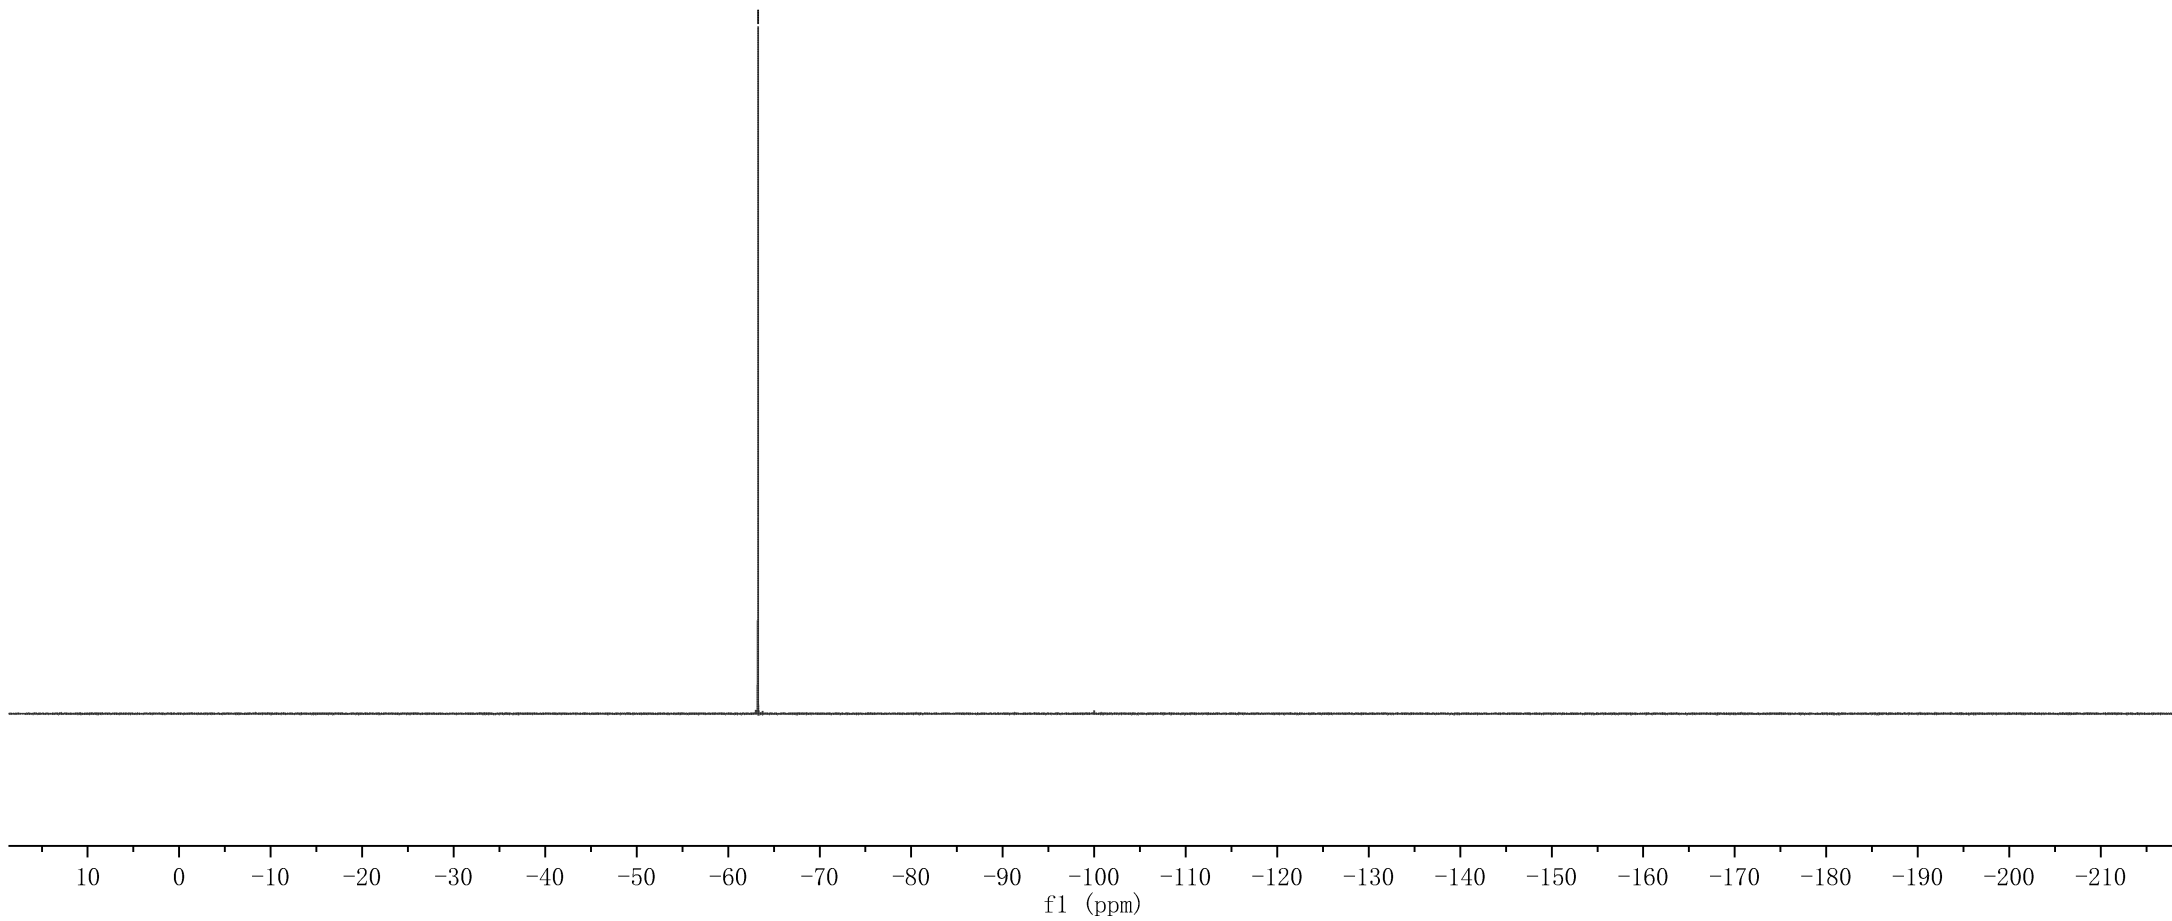



| Parameter                | Value               |
|--------------------------|---------------------|
| 1 Title                  | LFS-127-Ts-C        |
| 2 Origin                 | Bruker BioSpin GmbH |
| 3 Solvent                | CDC13               |
| 4 Temperature            | 300.0               |
| 5 Number of Scans        | 68                  |
| 6 Acquisition Time       | 1.3631              |
| 7 Acquisition Date       | 2022-03-27T17:13:53 |
| 8 Spectrometer Frequency | 100.61              |
| 9 Spectral Width         | 24038.5             |

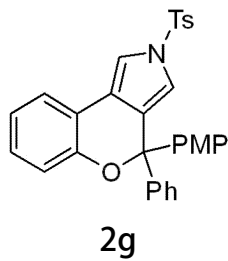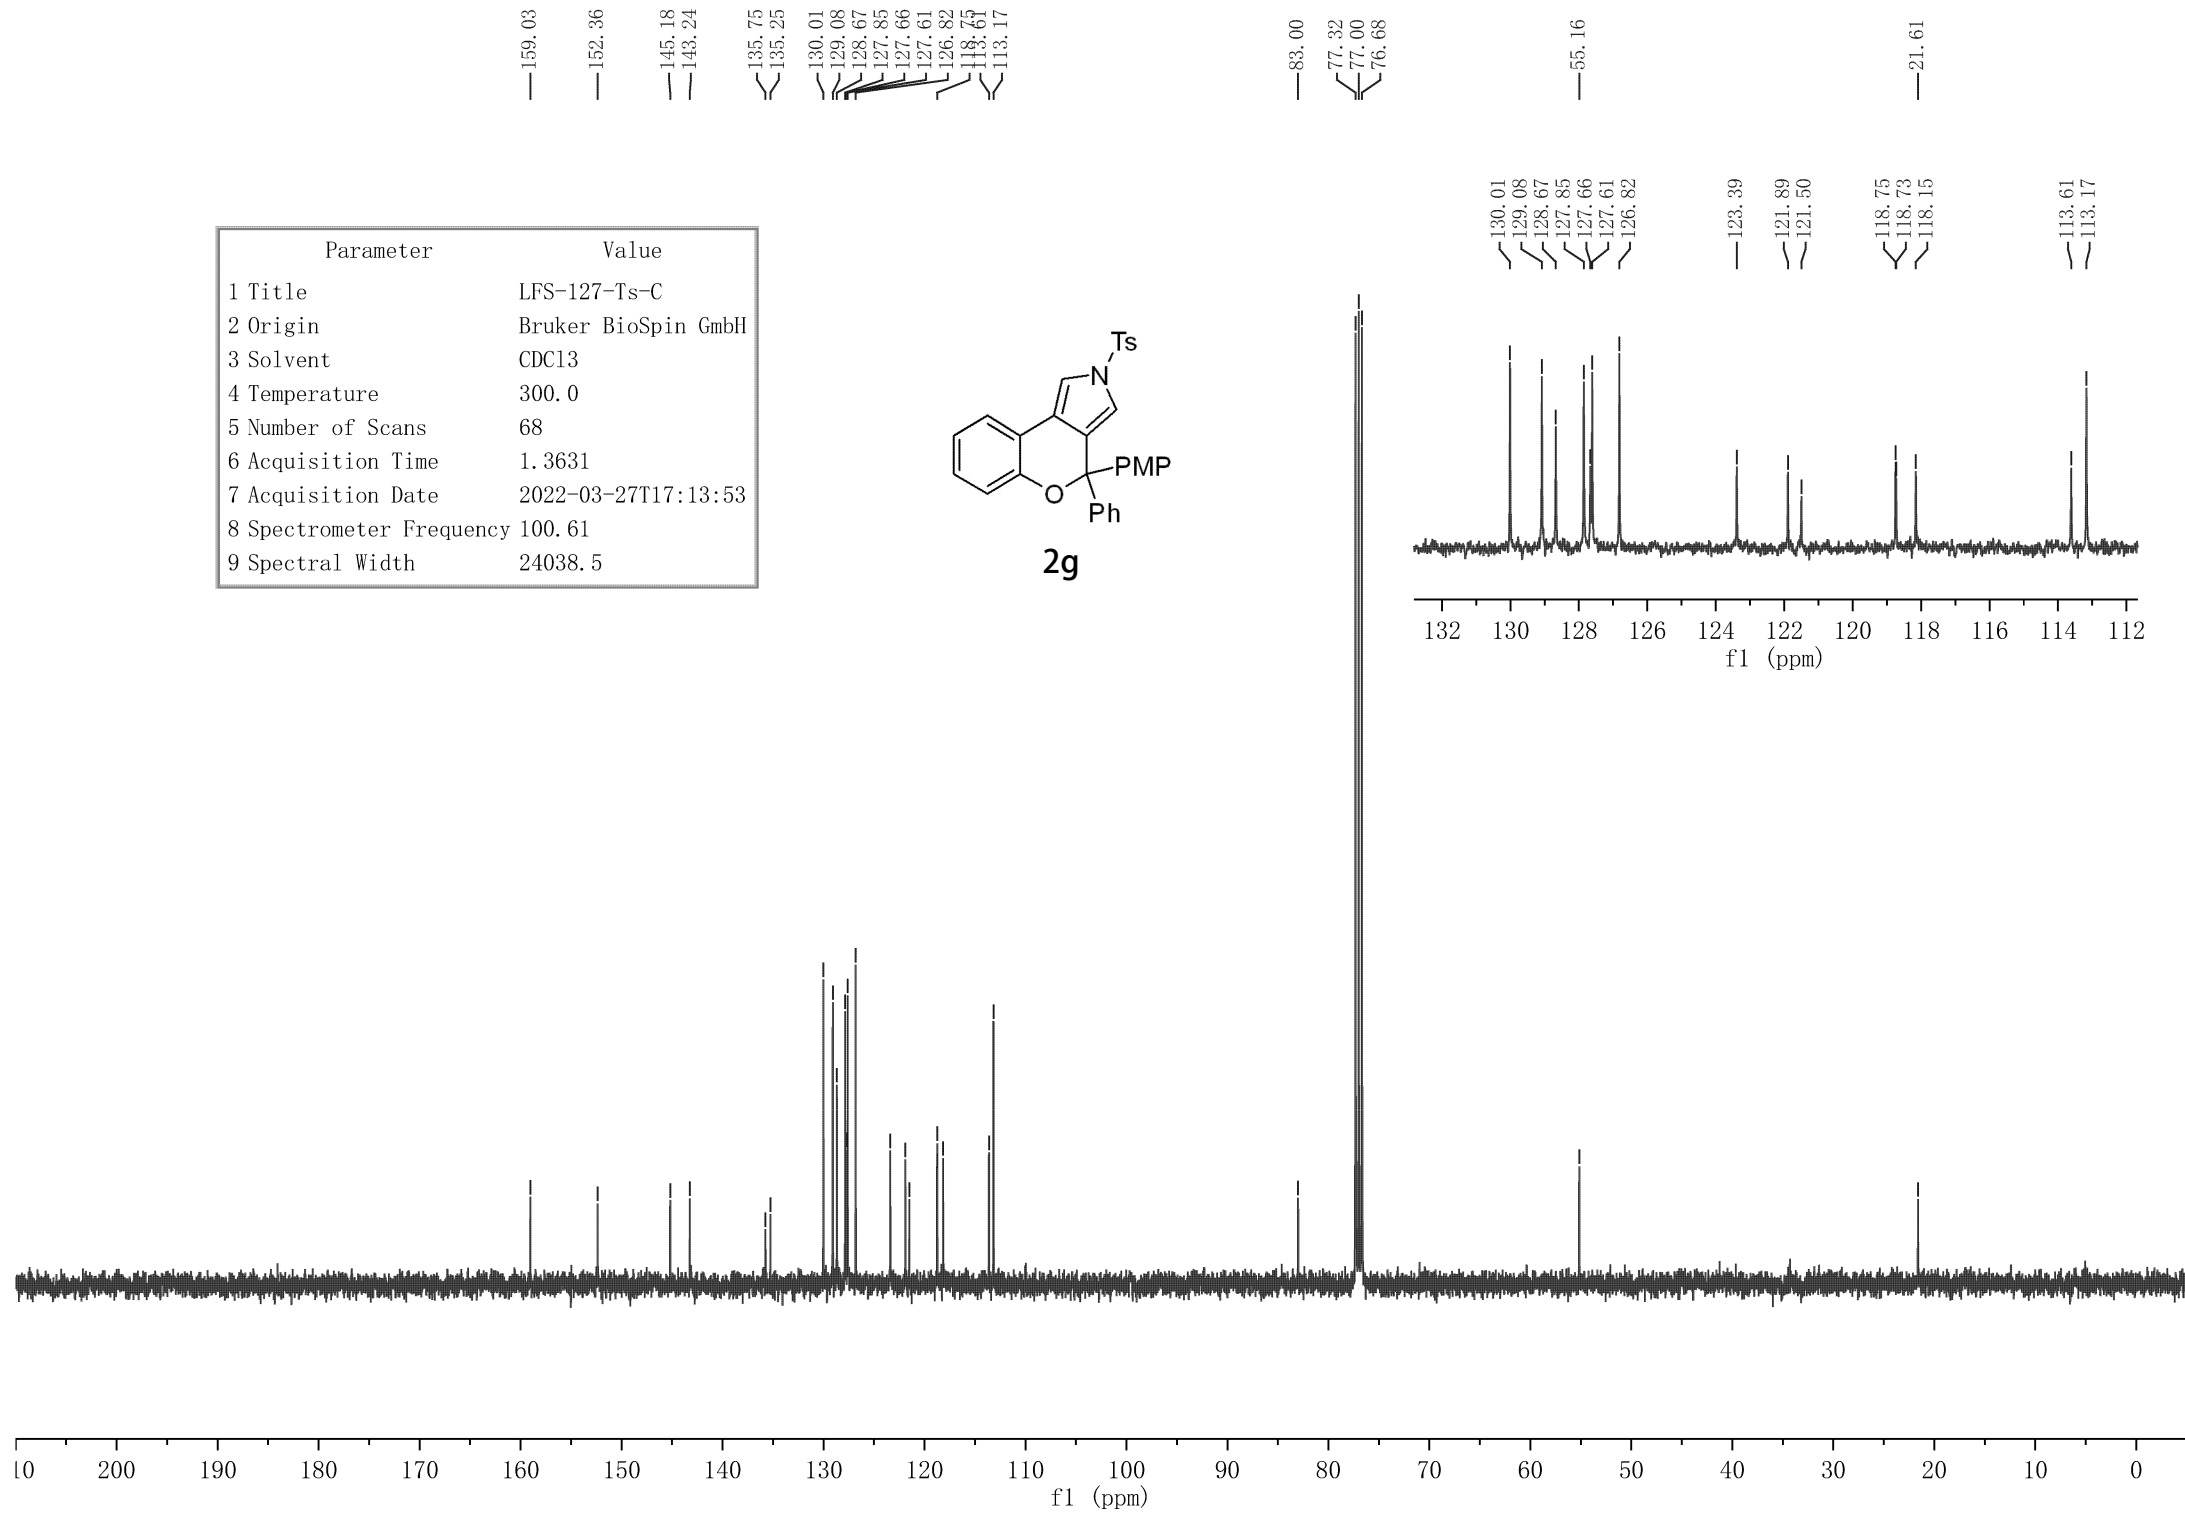

7.790  
7.768  
7.362  
7.357  
7.335  
7.332  
7.316  
7.313  
7.251  
7.237  
7.115  
7.093  
7.074  
7.071  
7.056  
7.052  
6.996  
6.994  
6.976  
6.973  
6.959  
6.936  
6.885  
6.882  
6.866  
6.863  
6.848  
6.845  
6.762  
6.740  
6.719  
6.714

3.851  
3.753

| Parameter                | Value               |
|--------------------------|---------------------|
| 1 Title                  | ZJJ-14-153-H        |
| 2 Origin                 | Bruker BioSpin GmbH |
| 3 Solvent                | CDCl3               |
| 4 Temperature            | 298.0               |
| 5 Number of Scans        | 8                   |
| 6 Acquisition Time       | 4.0894              |
| 7 Acquisition Date       | 2022-07-13T10:24:36 |
| 8 Spectrometer Frequency | 400.13              |
| 9 Spectral Width         | 8012.8              |

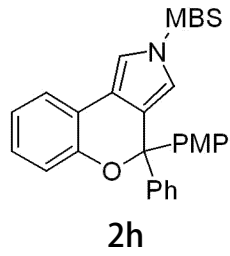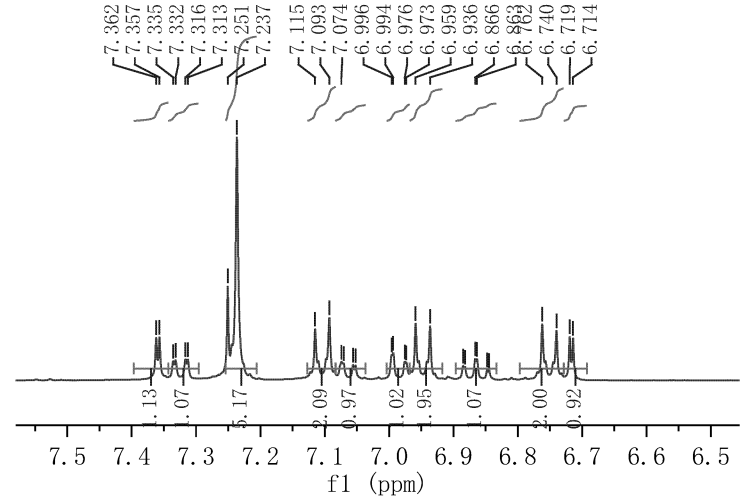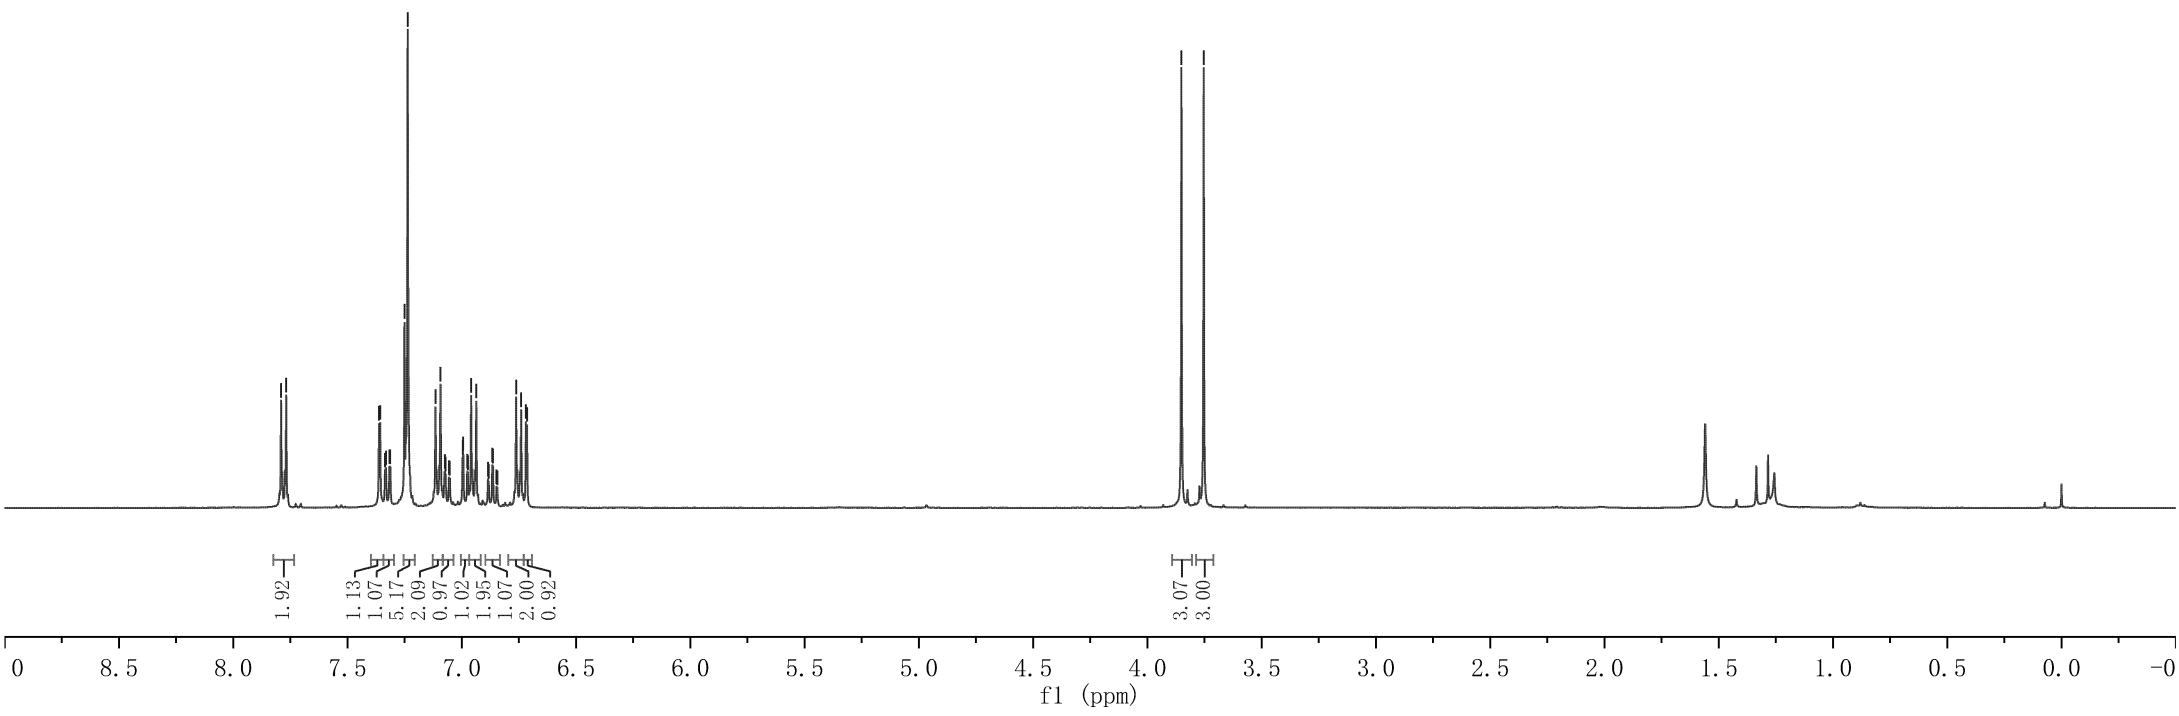

| Parameter                | Value               |
|--------------------------|---------------------|
| 1 Title                  | ZJJ-14-153-C        |
| 2 Origin                 | Bruker BioSpin GmbH |
| 3 Solvent                | CDC13               |
| 4 Temperature            | 300.0               |
| 5 Number of Scans        | 144                 |
| 6 Acquisition Time       | 1.3631              |
| 7 Acquisition Date       | 2022-07-13T10:25:52 |
| 8 Spectrometer Frequency | 100.61              |
| 9 Spectral Width         | 24038.5             |

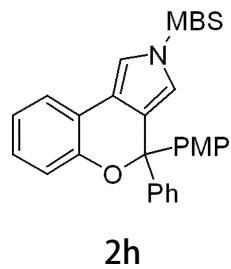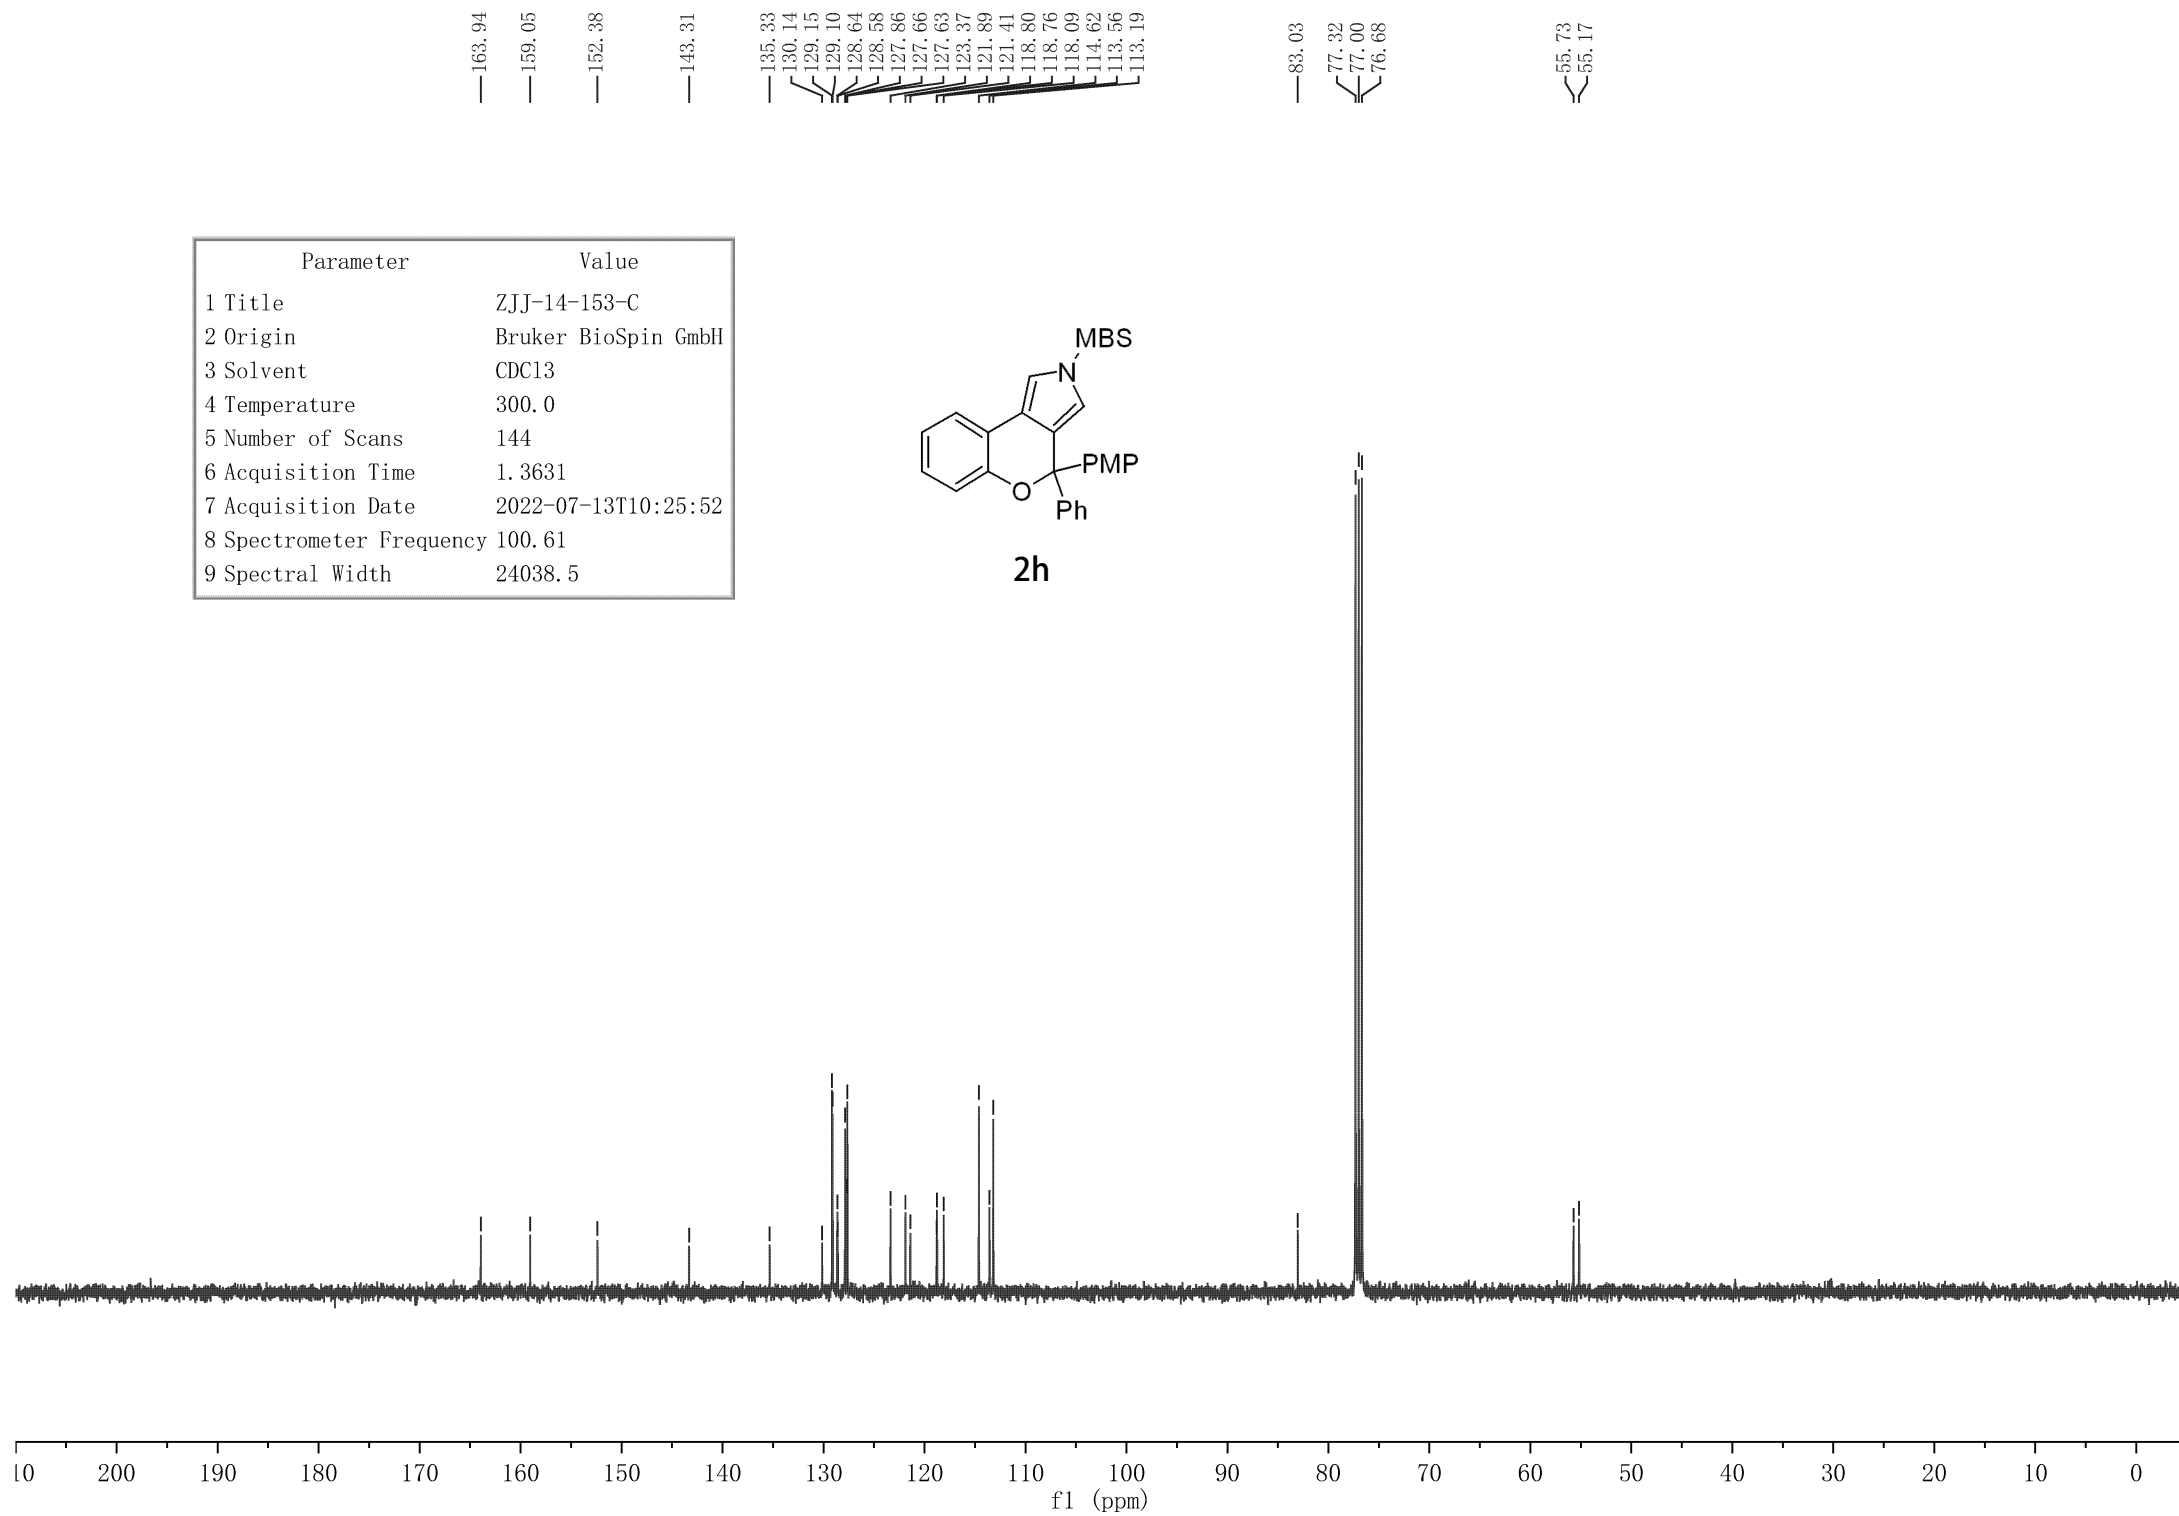



| Parameter                | Value               |
|--------------------------|---------------------|
| 1 Title                  | LFS-2-113-H         |
| 2 Origin                 | Bruker BioSpin GmbH |
| 3 Solvent                | CDC13               |
| 4 Temperature            | 298.0               |
| 5 Number of Scans        | 17                  |
| 6 Acquisition Time       | 4.0894              |
| 7 Acquisition Date       | 2022-03-16T14:10:10 |
| 8 Spectrometer Frequency | 400.13              |
| 9 Spectral Width         | 8012.8              |

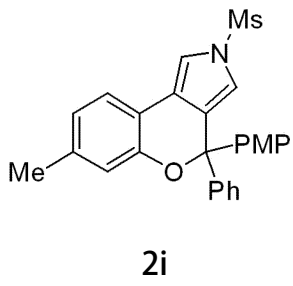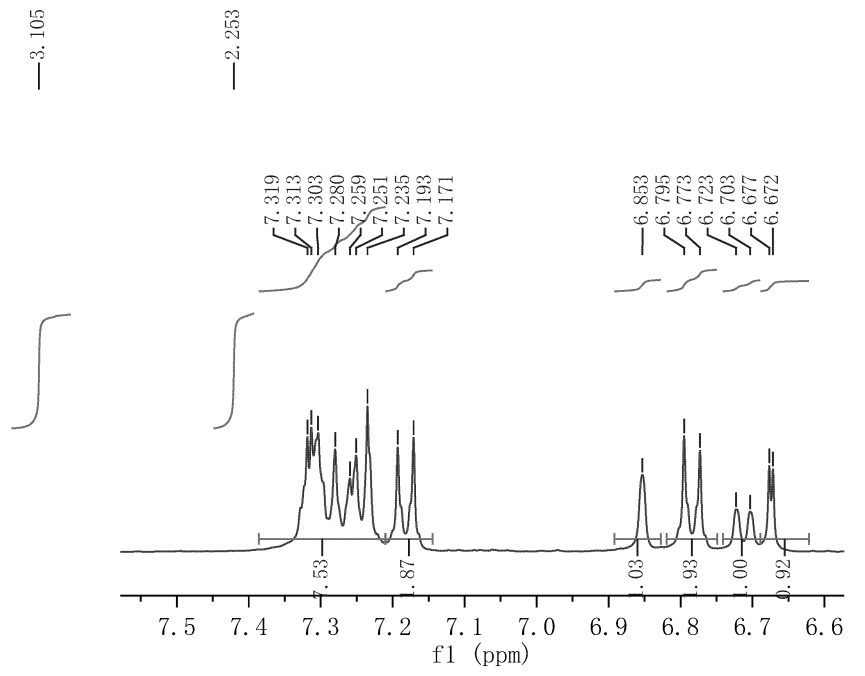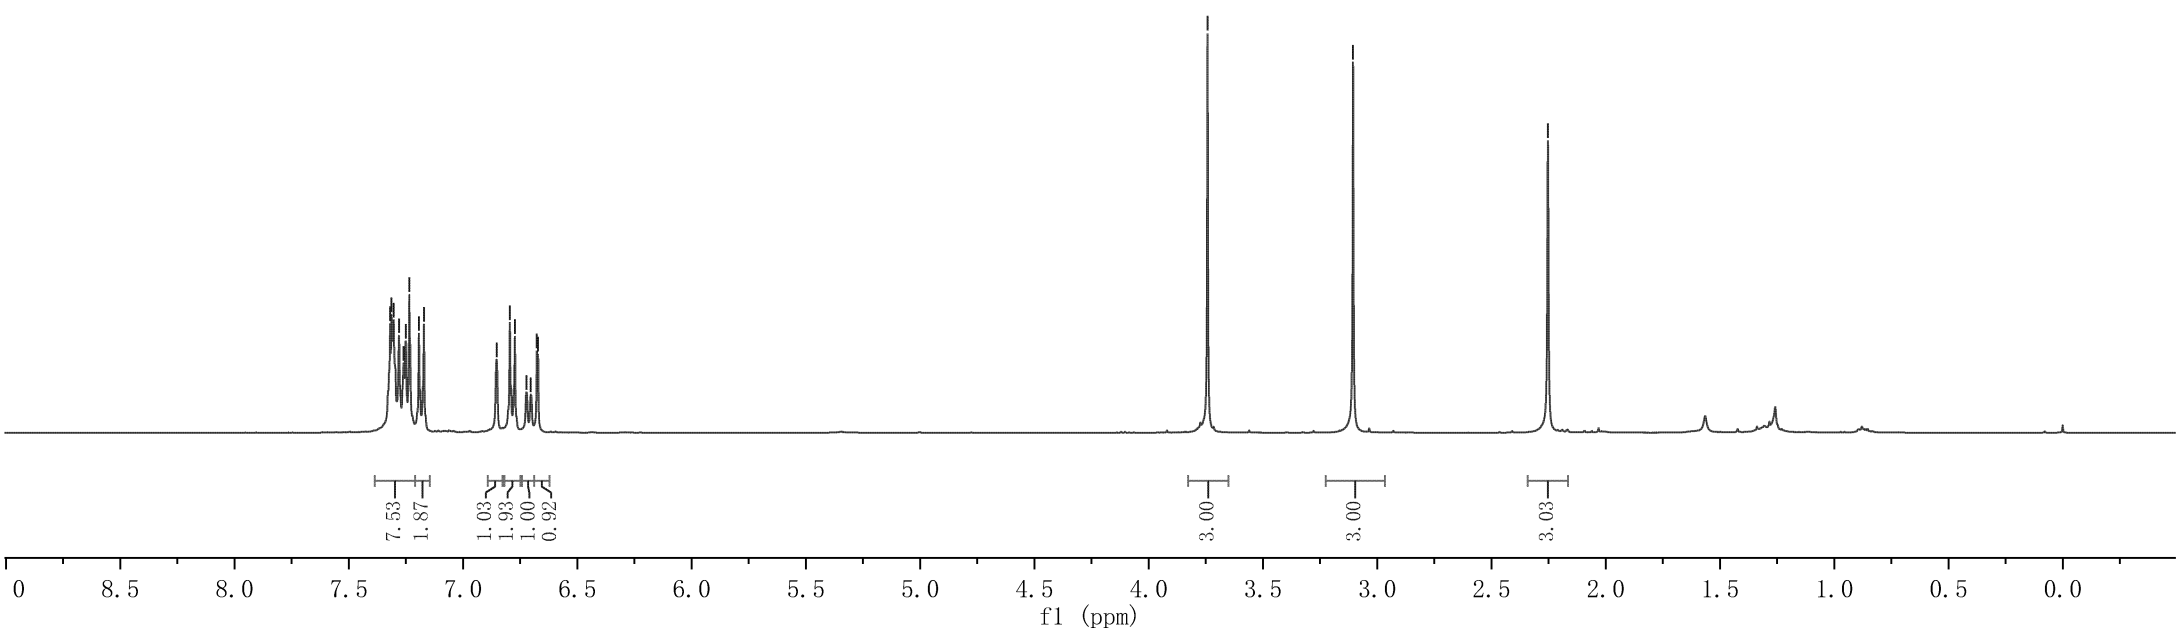

| Parameter                | Value               |
|--------------------------|---------------------|
| 1 Title                  | LFS-2-113-C         |
| 2 Origin                 | Bruker BioSpin GmbH |
| 3 Solvent                | CDCl3               |
| 4 Temperature            | 300.0               |
| 5 Number of Scans        | 102                 |
| 6 Acquisition Time       | 1.3631              |
| 7 Acquisition Date       | 2022-03-16T14:13:48 |
| 8 Spectrometer Frequency | 100.61              |
| 9 Spectral Width         | 24038.5             |

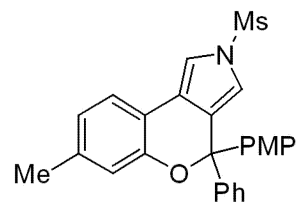

2i

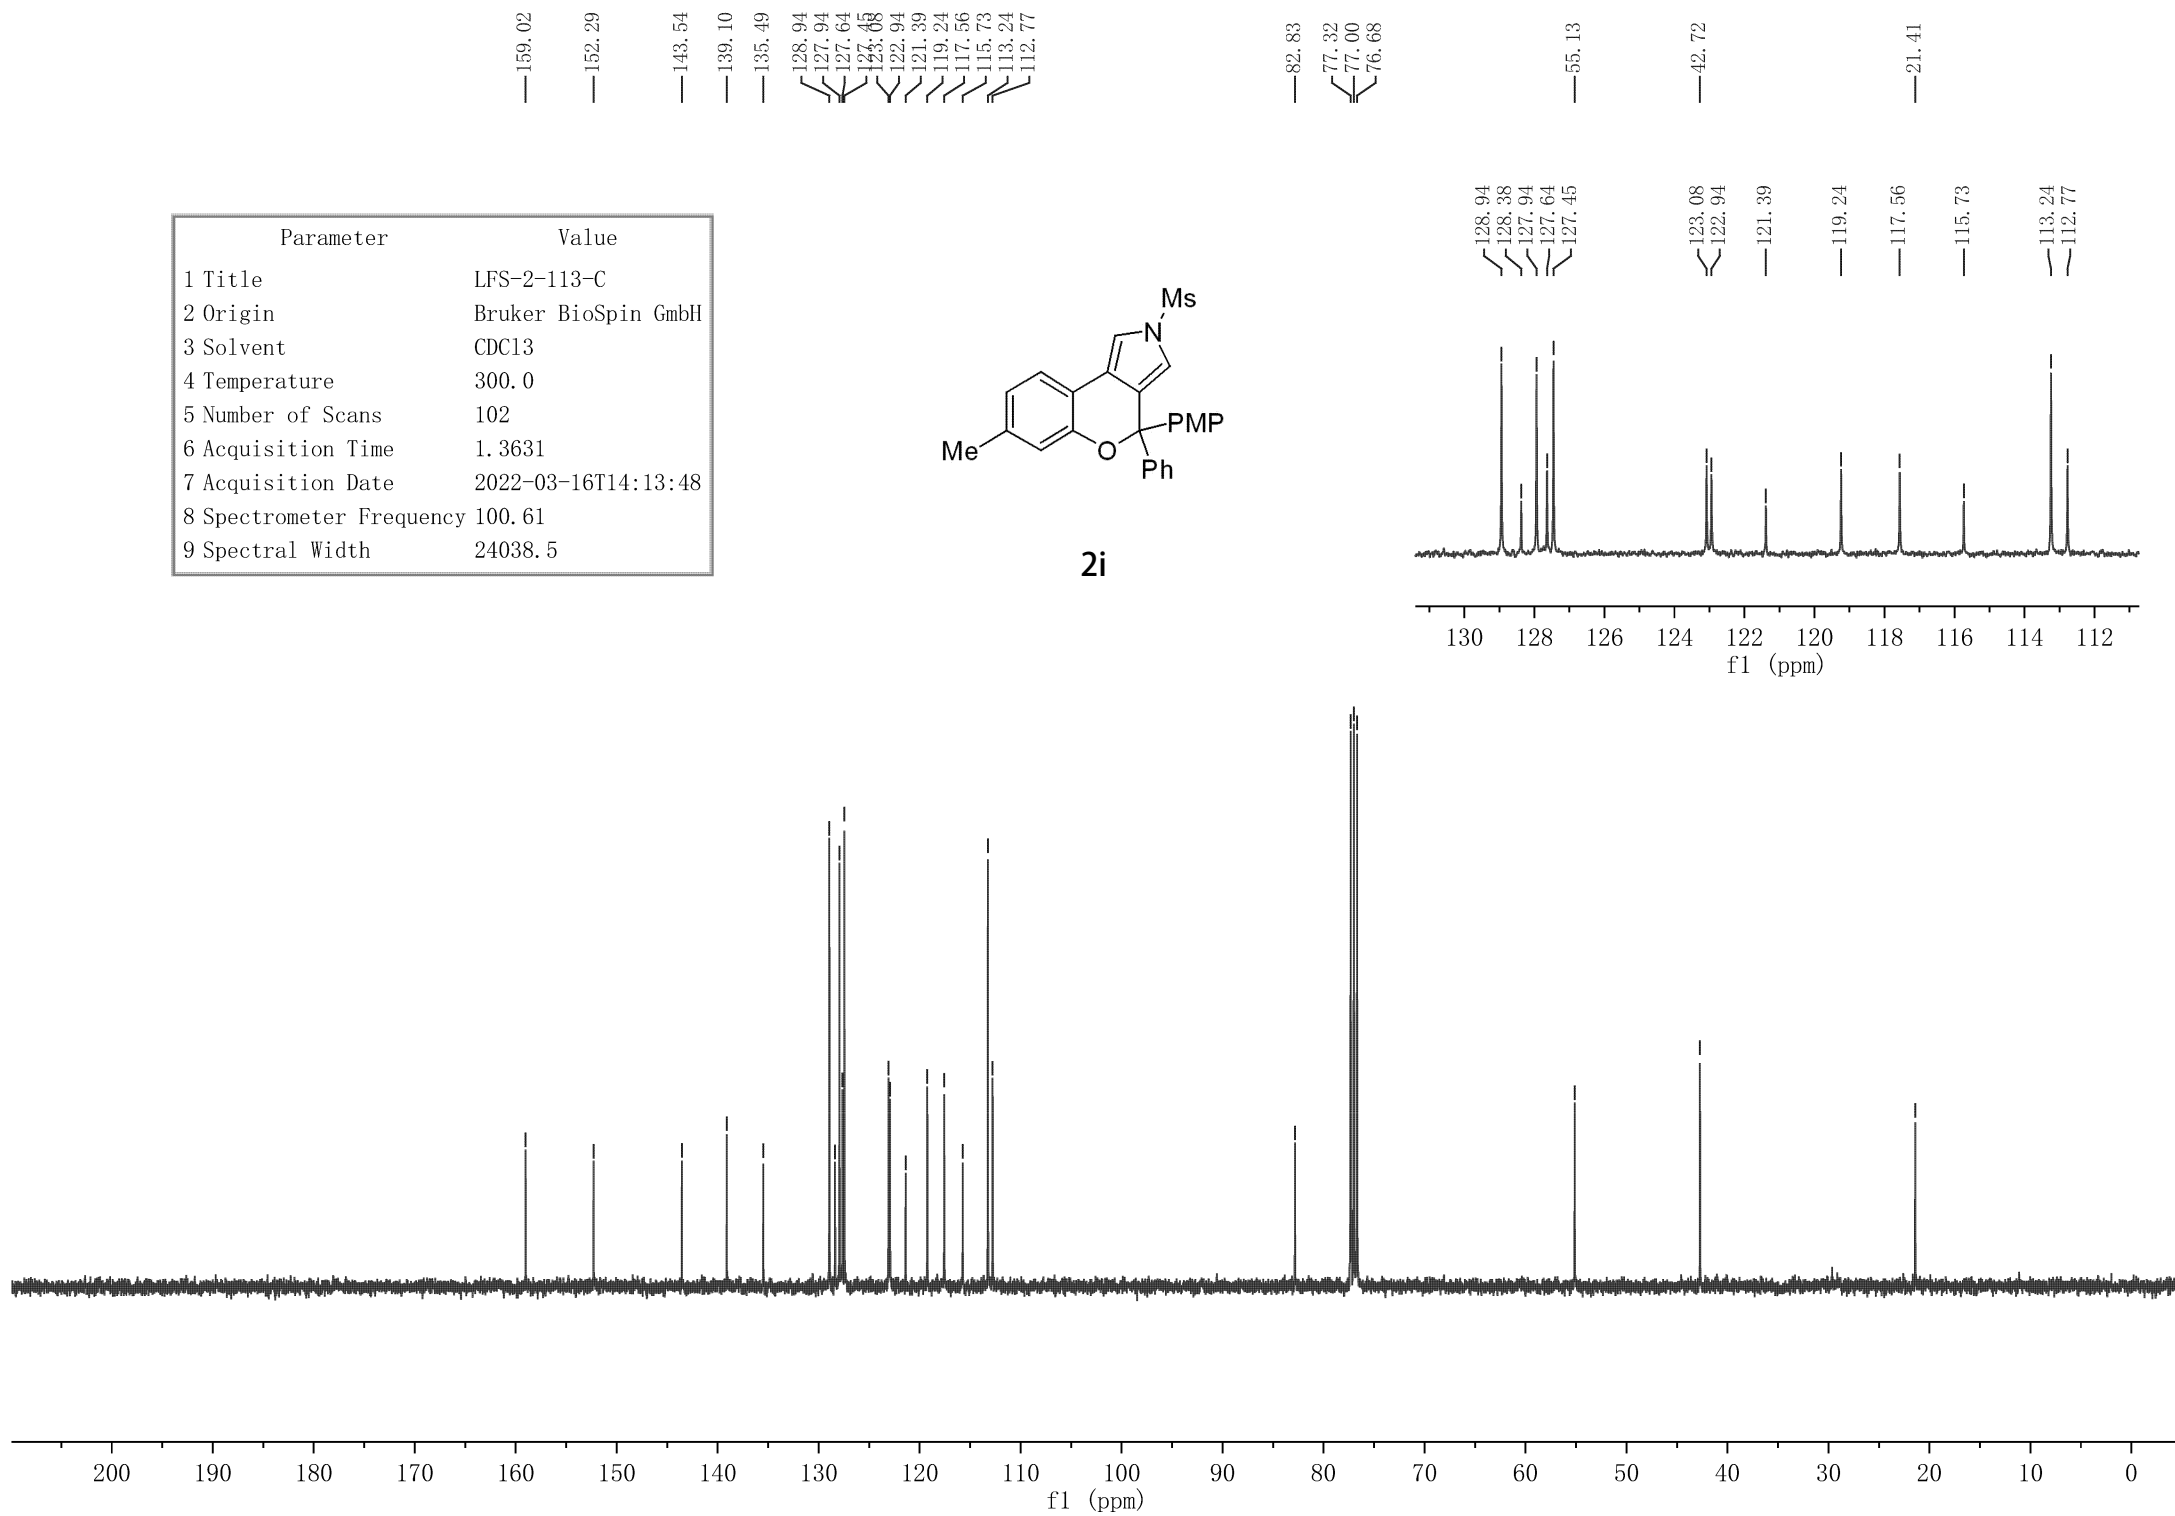

| Parameter                | Value               |
|--------------------------|---------------------|
| 1 Title                  | LFS-126-5-OMe-H     |
| 2 Origin                 | Bruker BioSpin GmbH |
| 3 Solvent                | CDC13               |
| 4 Temperature            | 298.0               |
| 5 Number of Scans        | 6                   |
| 6 Acquisition Time       | 4.0894              |
| 7 Acquisition Date       | 2022-03-28T15:37:16 |
| 8 Spectrometer Frequency | 400.13              |
| 9 Spectral Width         | 8012.8              |

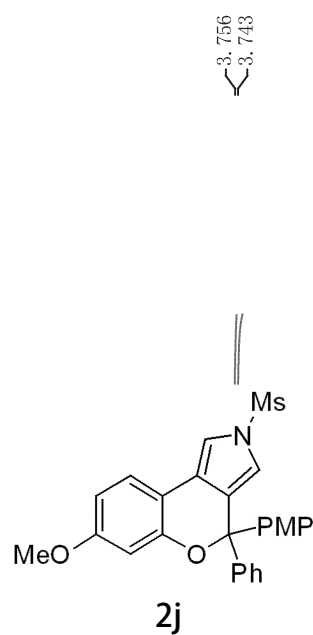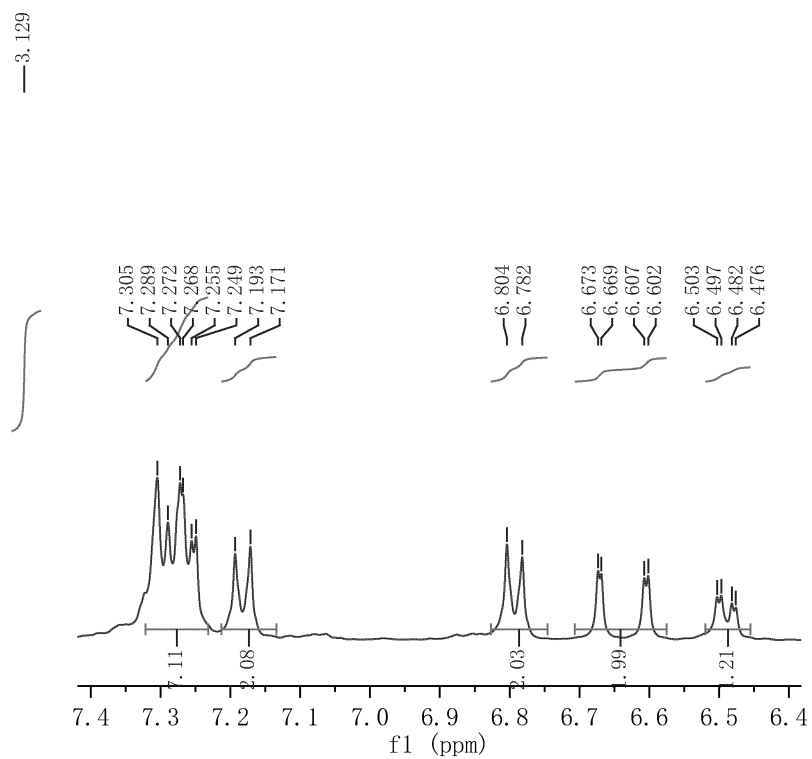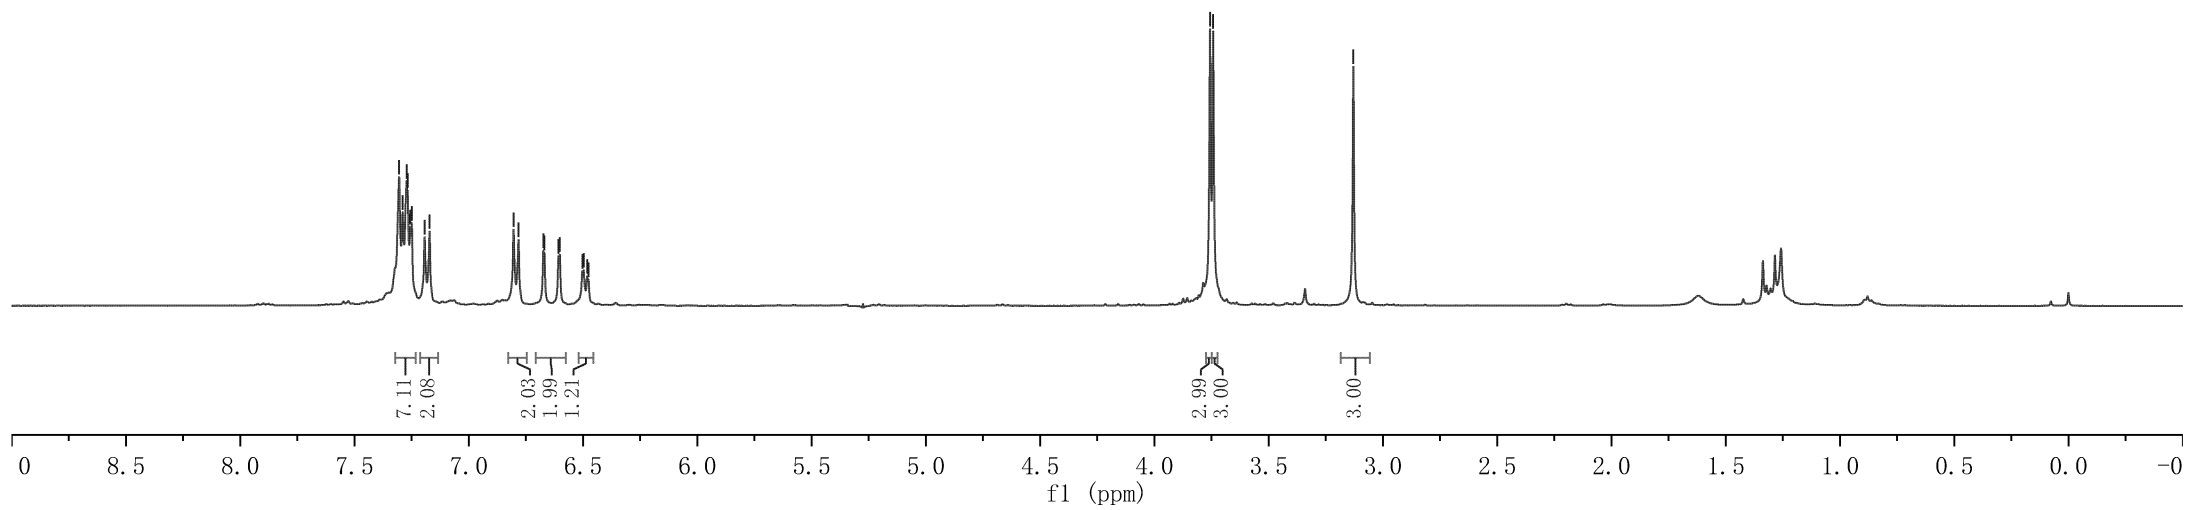

| Parameter                | Value               |
|--------------------------|---------------------|
| 1 Title                  | LFS-126-5-OMe-C     |
| 2 Origin                 | Bruker BioSpin GmbH |
| 3 Solvent                | CDC13               |
| 4 Temperature            | 300.0               |
| 5 Number of Scans        | 47                  |
| 6 Acquisition Time       | 1.3631              |
| 7 Acquisition Date       | 2022-03-28T15:39:09 |
| 8 Spectrometer Frequency | 100.61              |
| 9 Spectral Width         | 24038.5             |

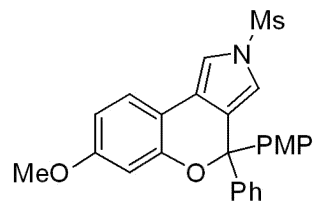

2j

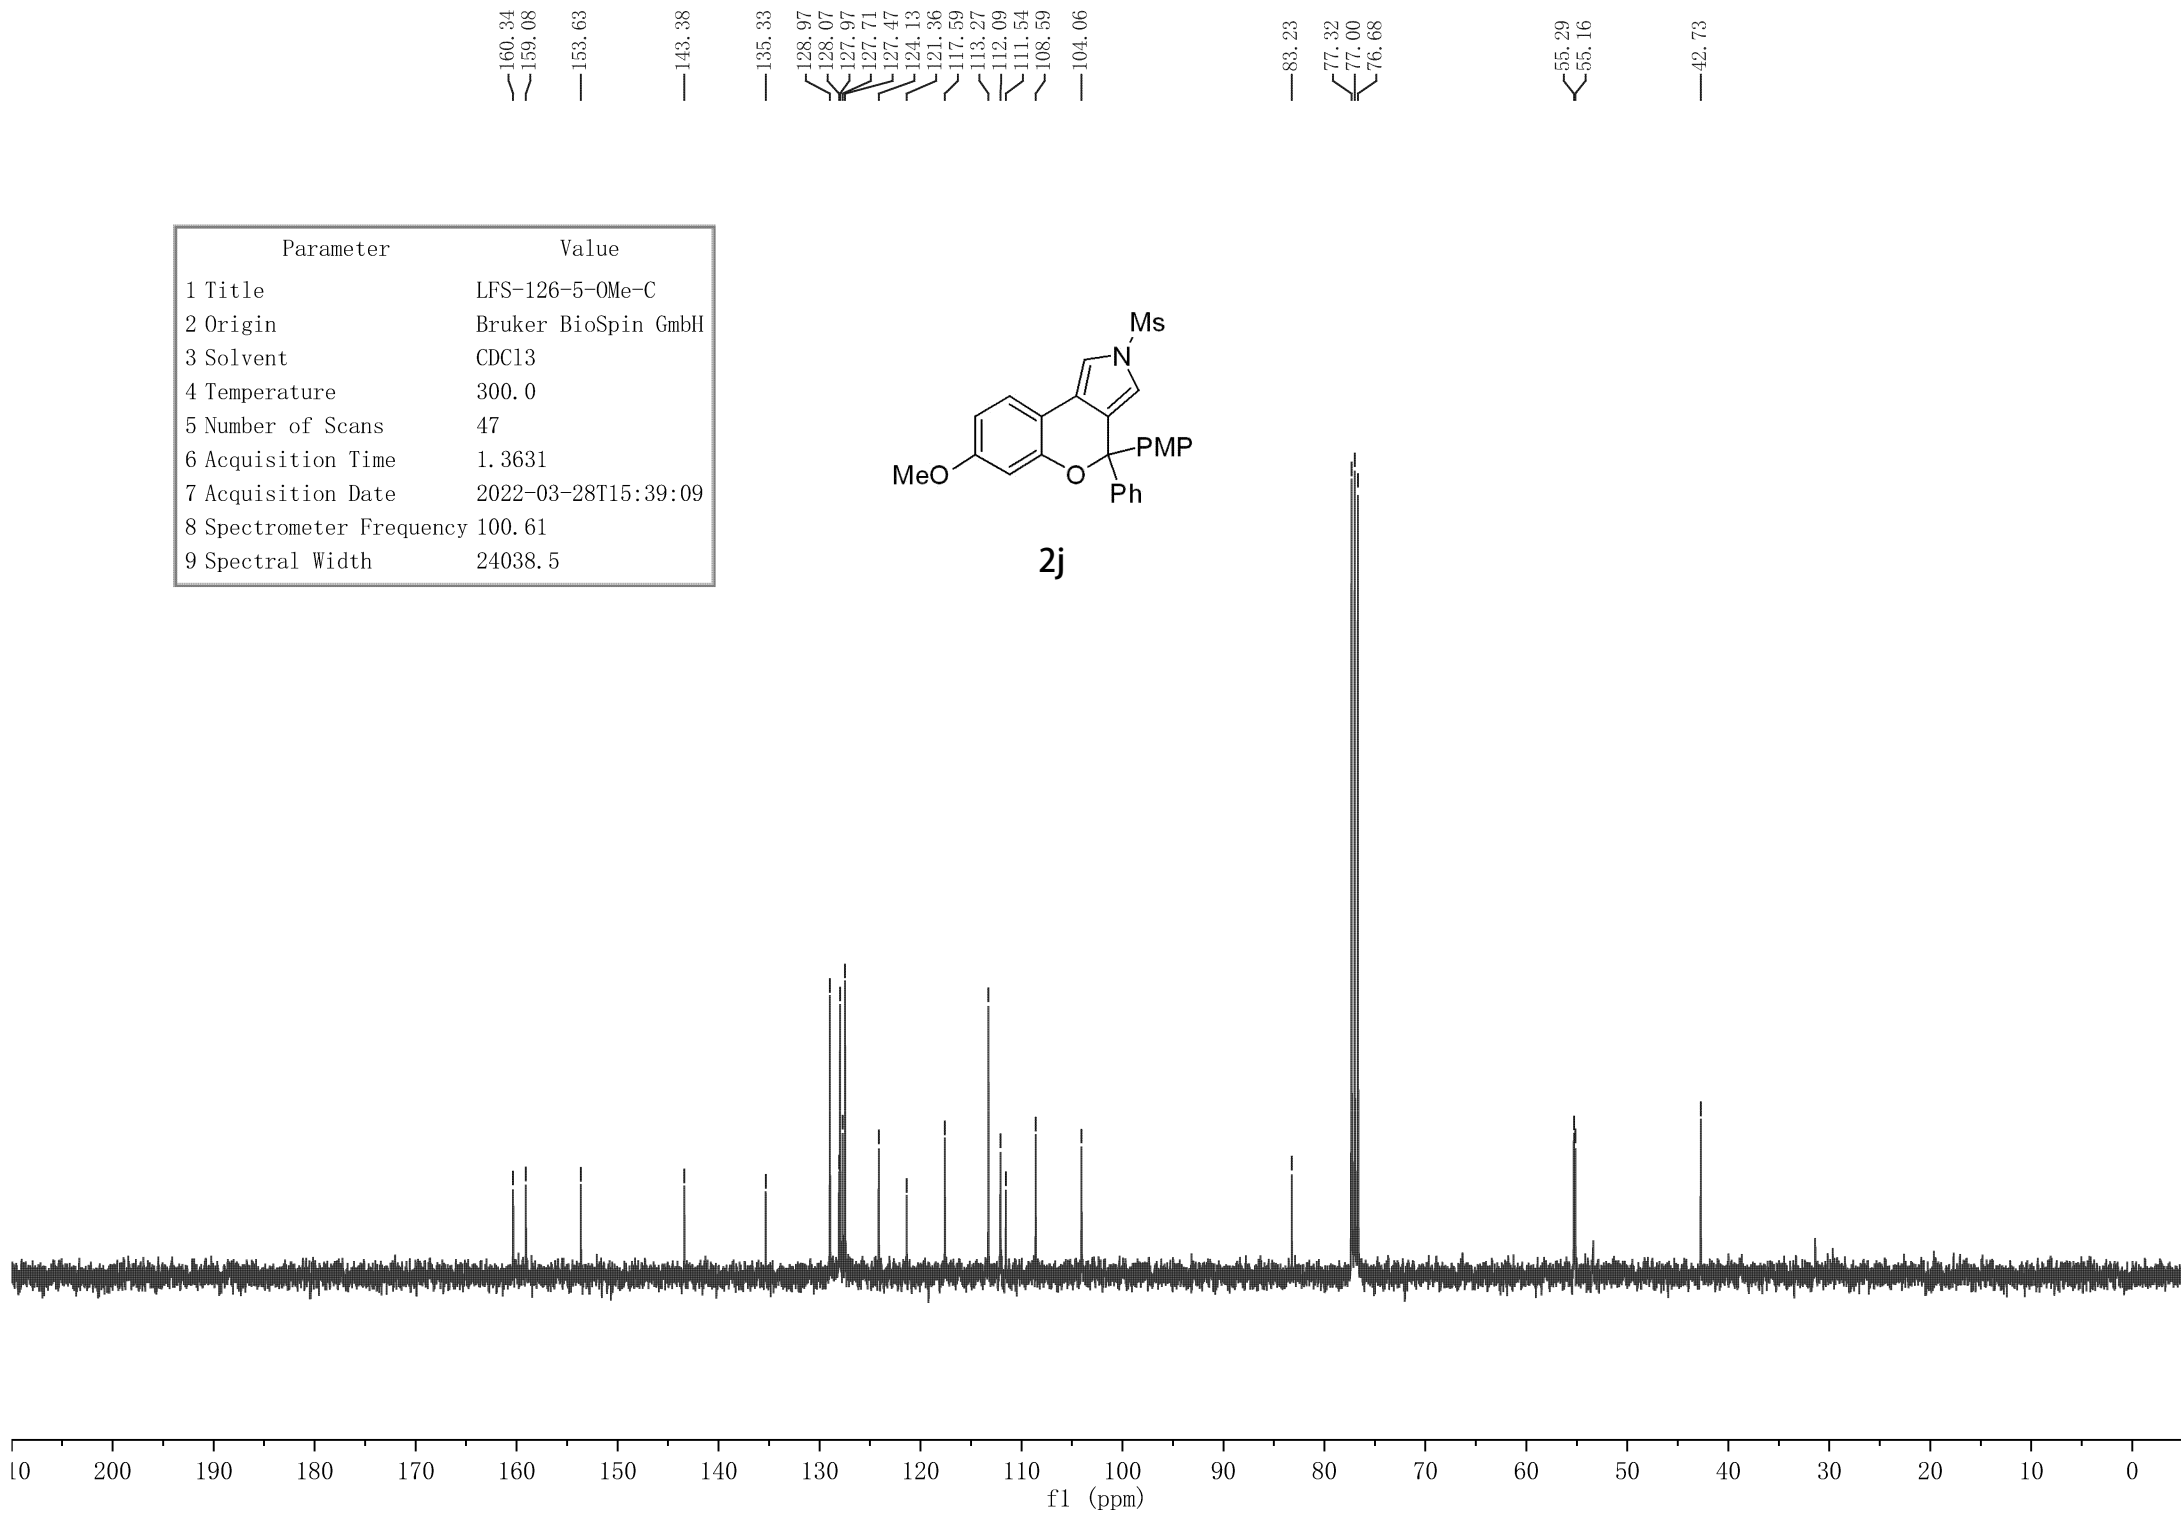

7.336  
7.330  
7.307  
7.295  
7.248  
7.179  
7.157  
6.812  
6.789  
6.780  
6.774  
6.755  
6.749  
6.701  
6.695  
6.655  
6.649  
6.634  
6.612  
6.606

3.762

3.159

| Parameter                | Value               |
|--------------------------|---------------------|
| 1 Title                  | zjj-14-11-H         |
| 2 Origin                 | Bruker BioSpin GmbH |
| 3 Solvent                | CDC13               |
| 4 Temperature            | 295.1               |
| 5 Number of Scans        | 12                  |
| 6 Acquisition Time       | 3.9846              |
| 7 Acquisition Date       | 2022-04-07T10:12:06 |
| 8 Spectrometer Frequency | 399.93              |
| 9 Spectral Width         | 8223.7              |

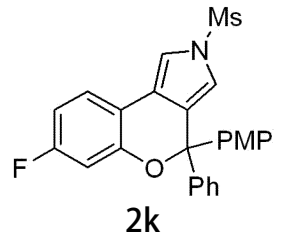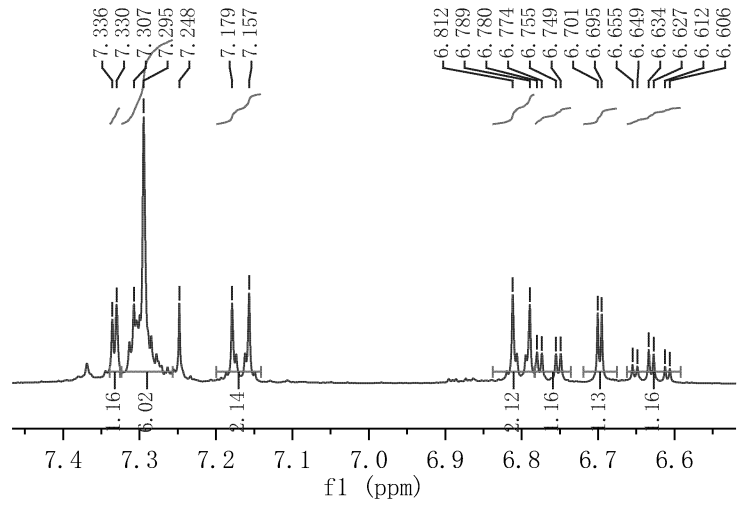

6.812  
6.789  
6.780  
6.774  
6.755  
6.749  
6.701  
6.695  
6.655  
6.649  
6.634  
6.627  
6.612  
6.606

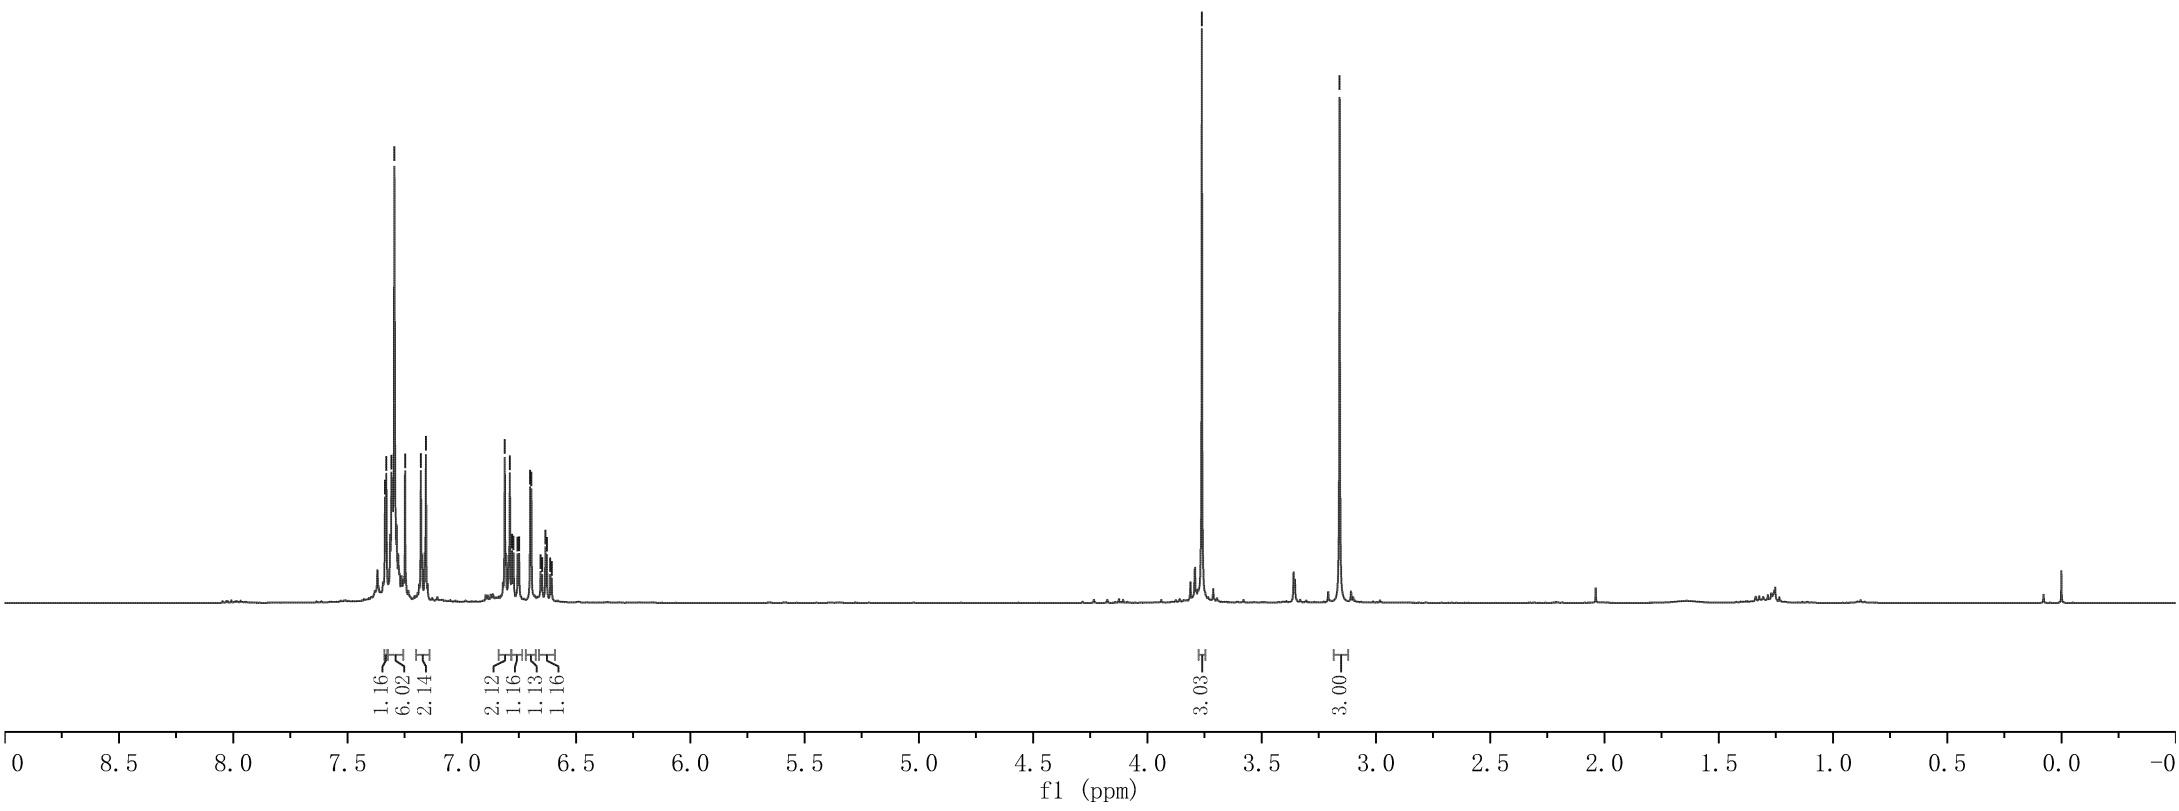

| Parameter                | Value               |
|--------------------------|---------------------|
| 1 Title                  | zjj-14-11-C         |
| 2 Origin                 | Bruker BioSpin GmbH |
| 3 Solvent                | CDC13               |
| 4 Temperature            | 295.6               |
| 5 Number of Scans        | 96                  |
| 6 Acquisition Time       | 1.3631              |
| 7 Acquisition Date       | 2022-04-07T10:15:13 |
| 8 Spectrometer Frequency | 100.56              |
| 9 Spectral Width         | 24038.5             |

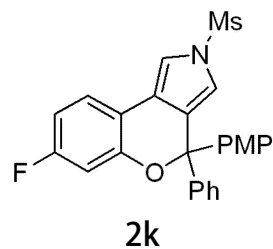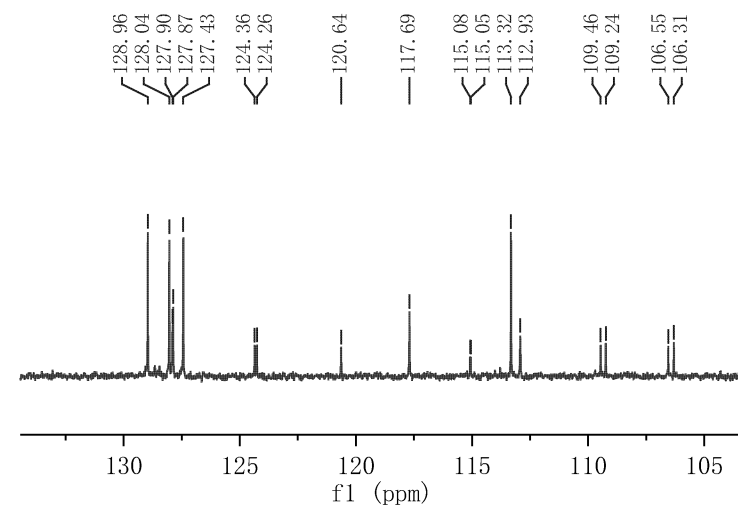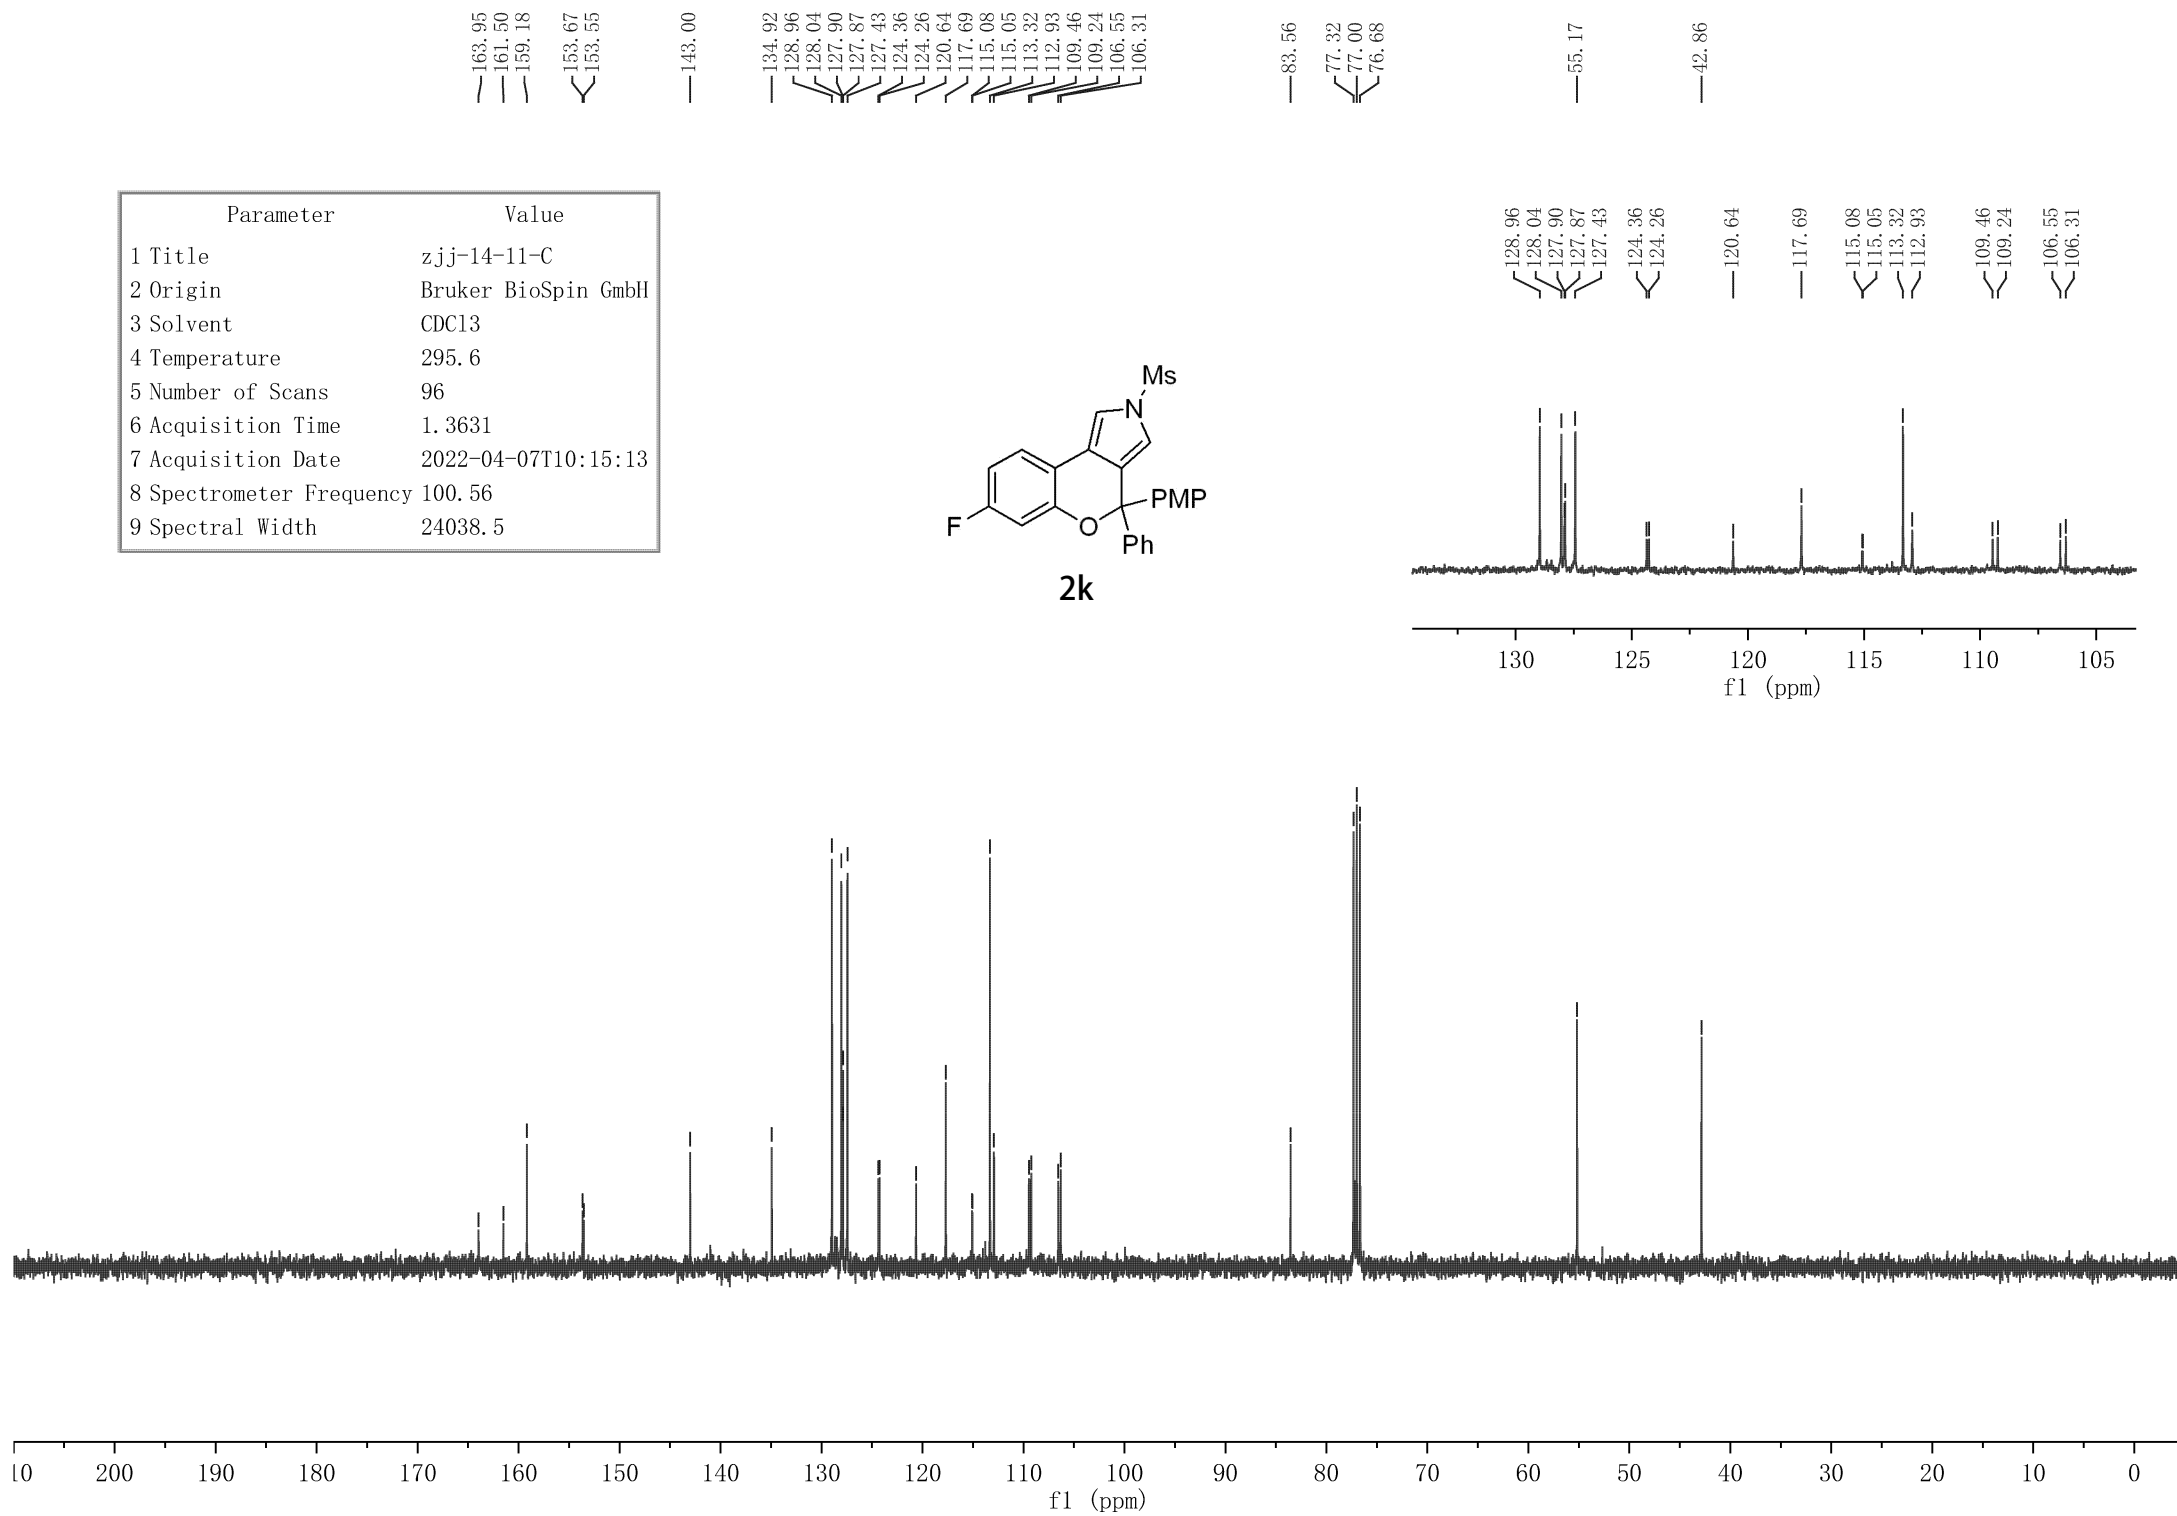

$^{19}\text{F}$  NMR (376 MHz,  $\text{CDCl}_3$ )  $\delta = -111.55$ .

| Parameter                | Value               |
|--------------------------|---------------------|
| 1 Title                  | zjj-14-11-F         |
| 2 Origin                 | Bruker BioSpin GmbH |
| 3 Solvent                | $\text{CDCl}_3$     |
| 4 Temperature            | 295.5               |
| 5 Number of Scans        | 10                  |
| 6 Acquisition Time       | 0.7340              |
| 7 Acquisition Date       | 2022-04-07T10:22:47 |
| 8 Spectrometer Frequency | 376.31              |
| 9 Spectral Width         | 89285.7             |

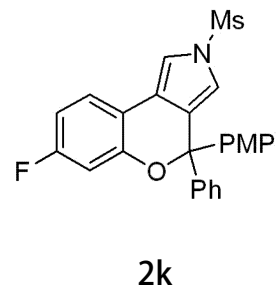

$\delta = -111.55$

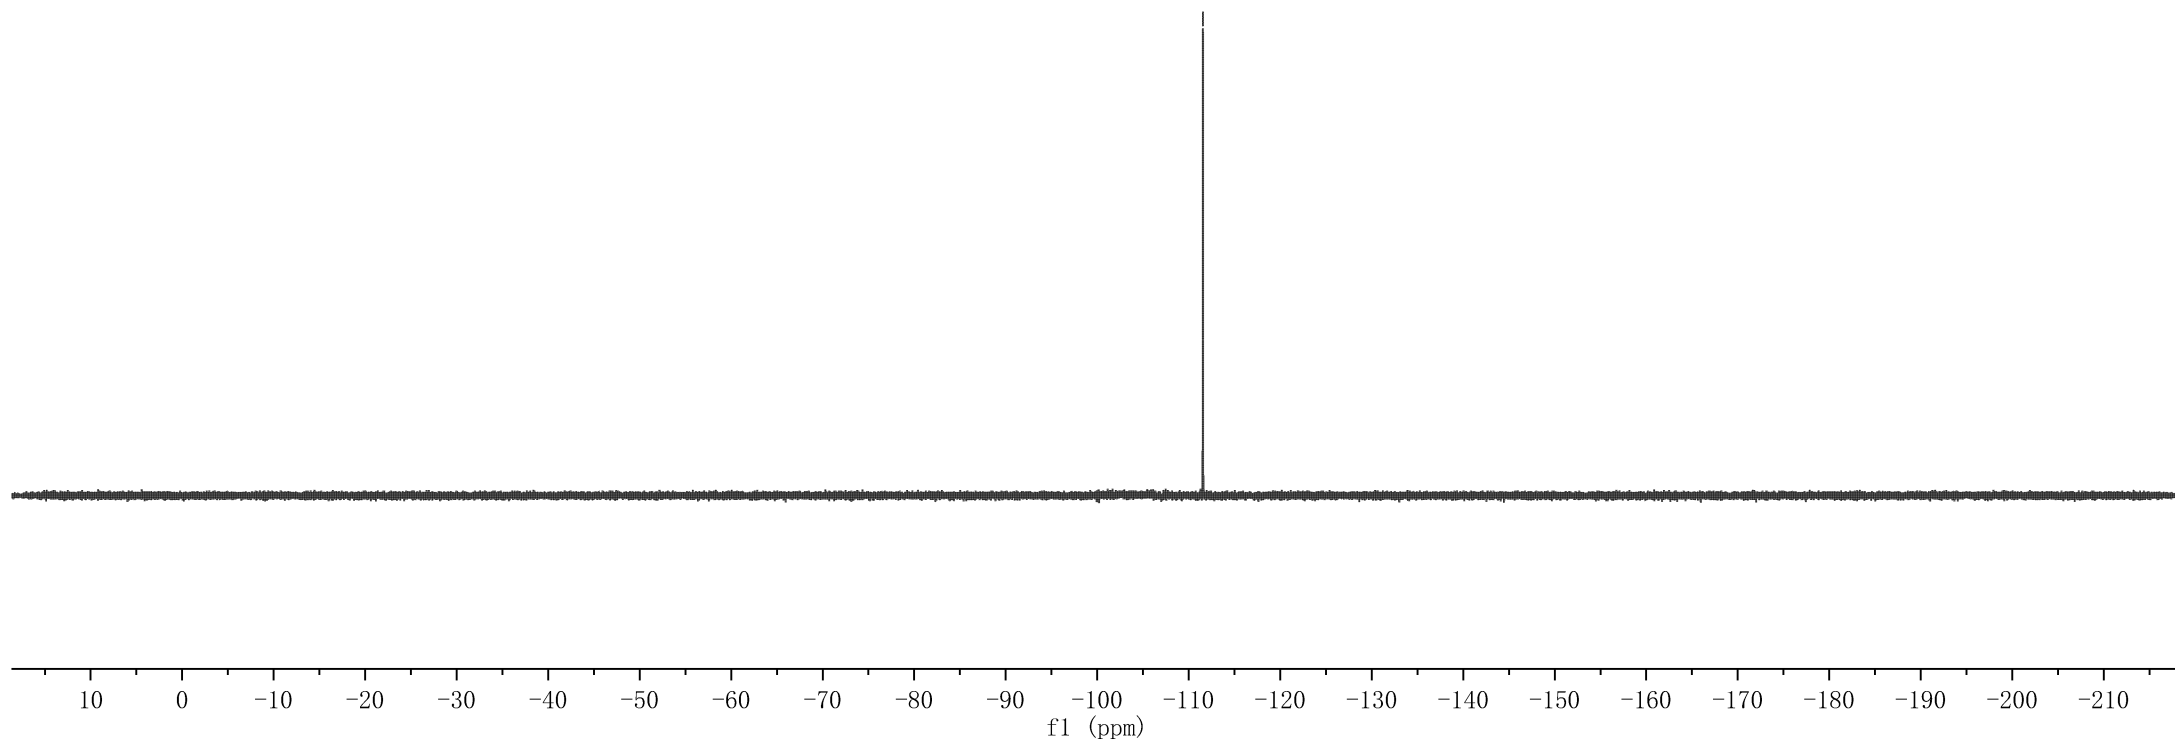

| Parameter                | Value                   |
|--------------------------|-------------------------|
| 1 Title                  | zjj-14-22-5-Cl-chanwu-H |
| 2 Origin                 | Bruker BioSpin GmbH     |
| 3 Solvent                | CDCl3                   |
| 4 Temperature            | 298.0                   |
| 5 Number of Scans        | 14                      |
| 6 Acquisition Time       | 4.0894                  |
| 7 Acquisition Date       | 2022-04-11T19:45:47     |
| 8 Spectrometer Frequency | 400.13                  |
| 9 Spectral Width         | 8012.8                  |

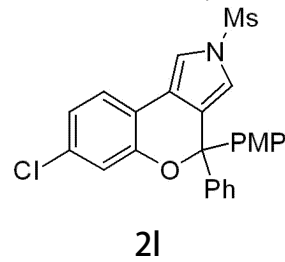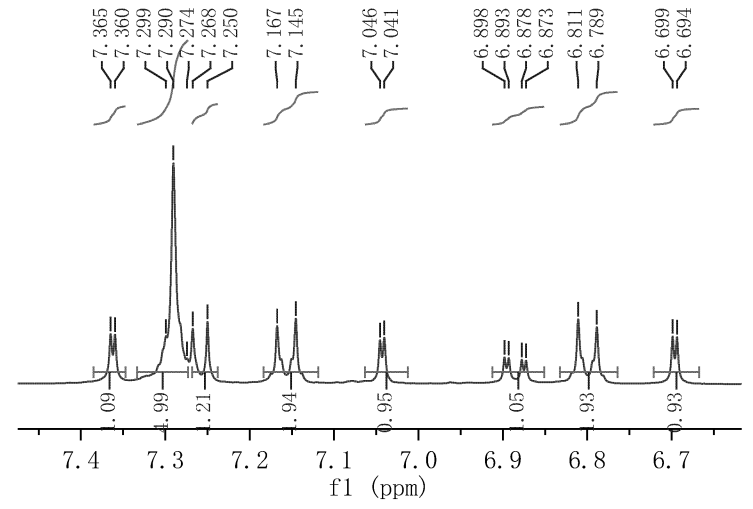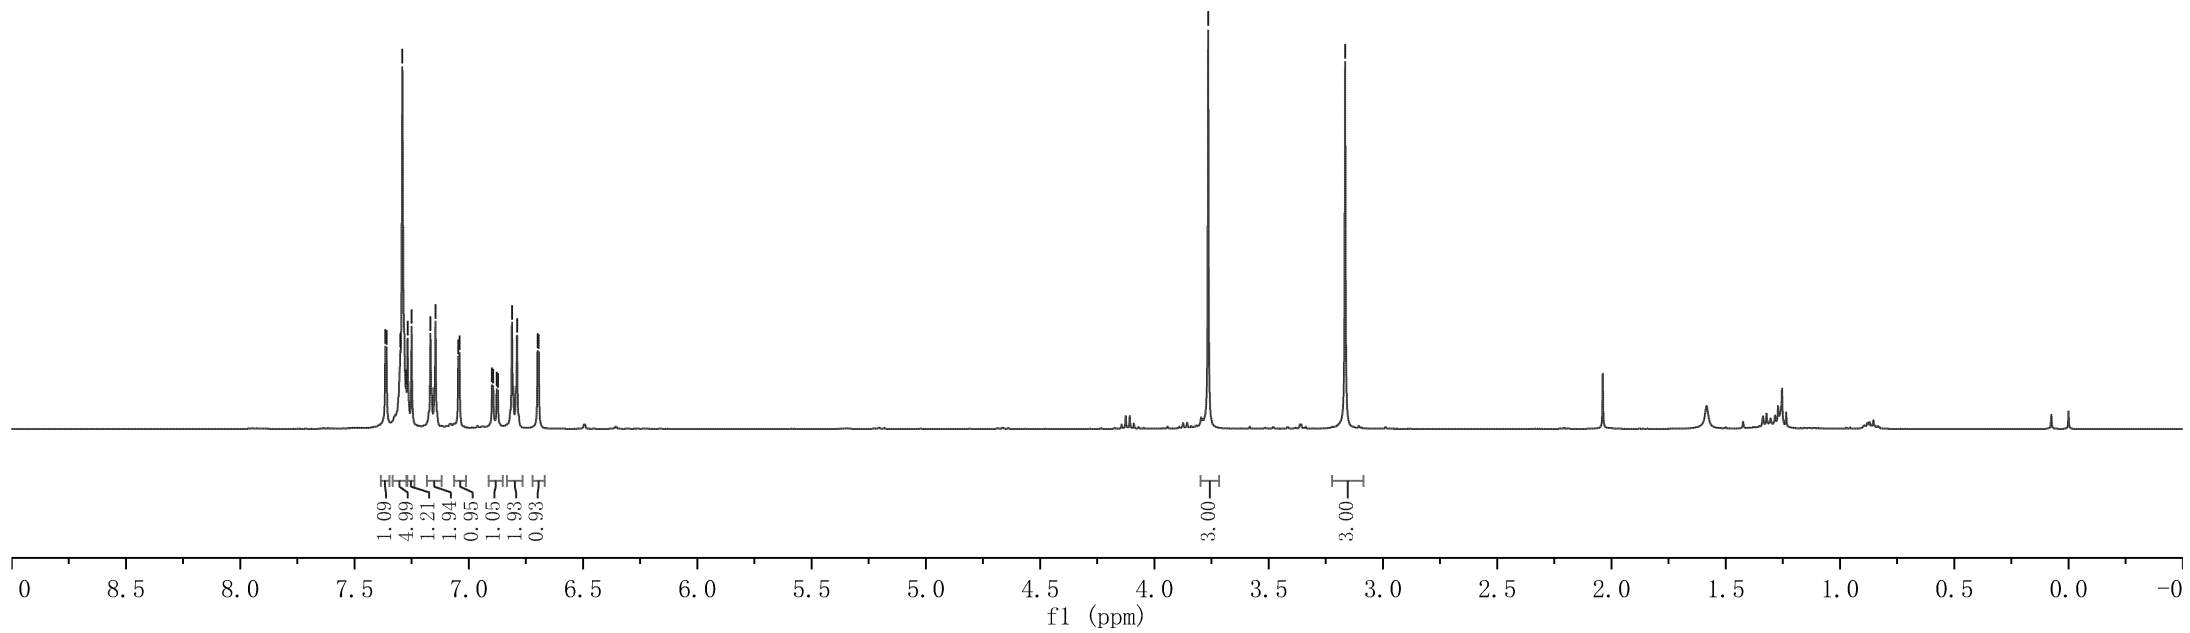



| Parameter                | Value                   |
|--------------------------|-------------------------|
| 1 Title                  | zjj-14-22-5-C1-chanwu-C |
| 2 Origin                 | Bruker BioSpin GmbH     |
| 3 Solvent                | CDC13                   |
| 4 Temperature            | 300.0                   |
| 5 Number of Scans        | 43                      |
| 6 Acquisition Time       | 1.3631                  |
| 7 Acquisition Date       | 2022-04-11T19:48:21     |
| 8 Spectrometer Frequency | 100.61                  |
| 9 Spectral Width         | 24038.5                 |

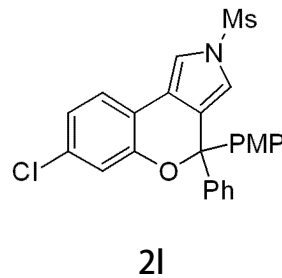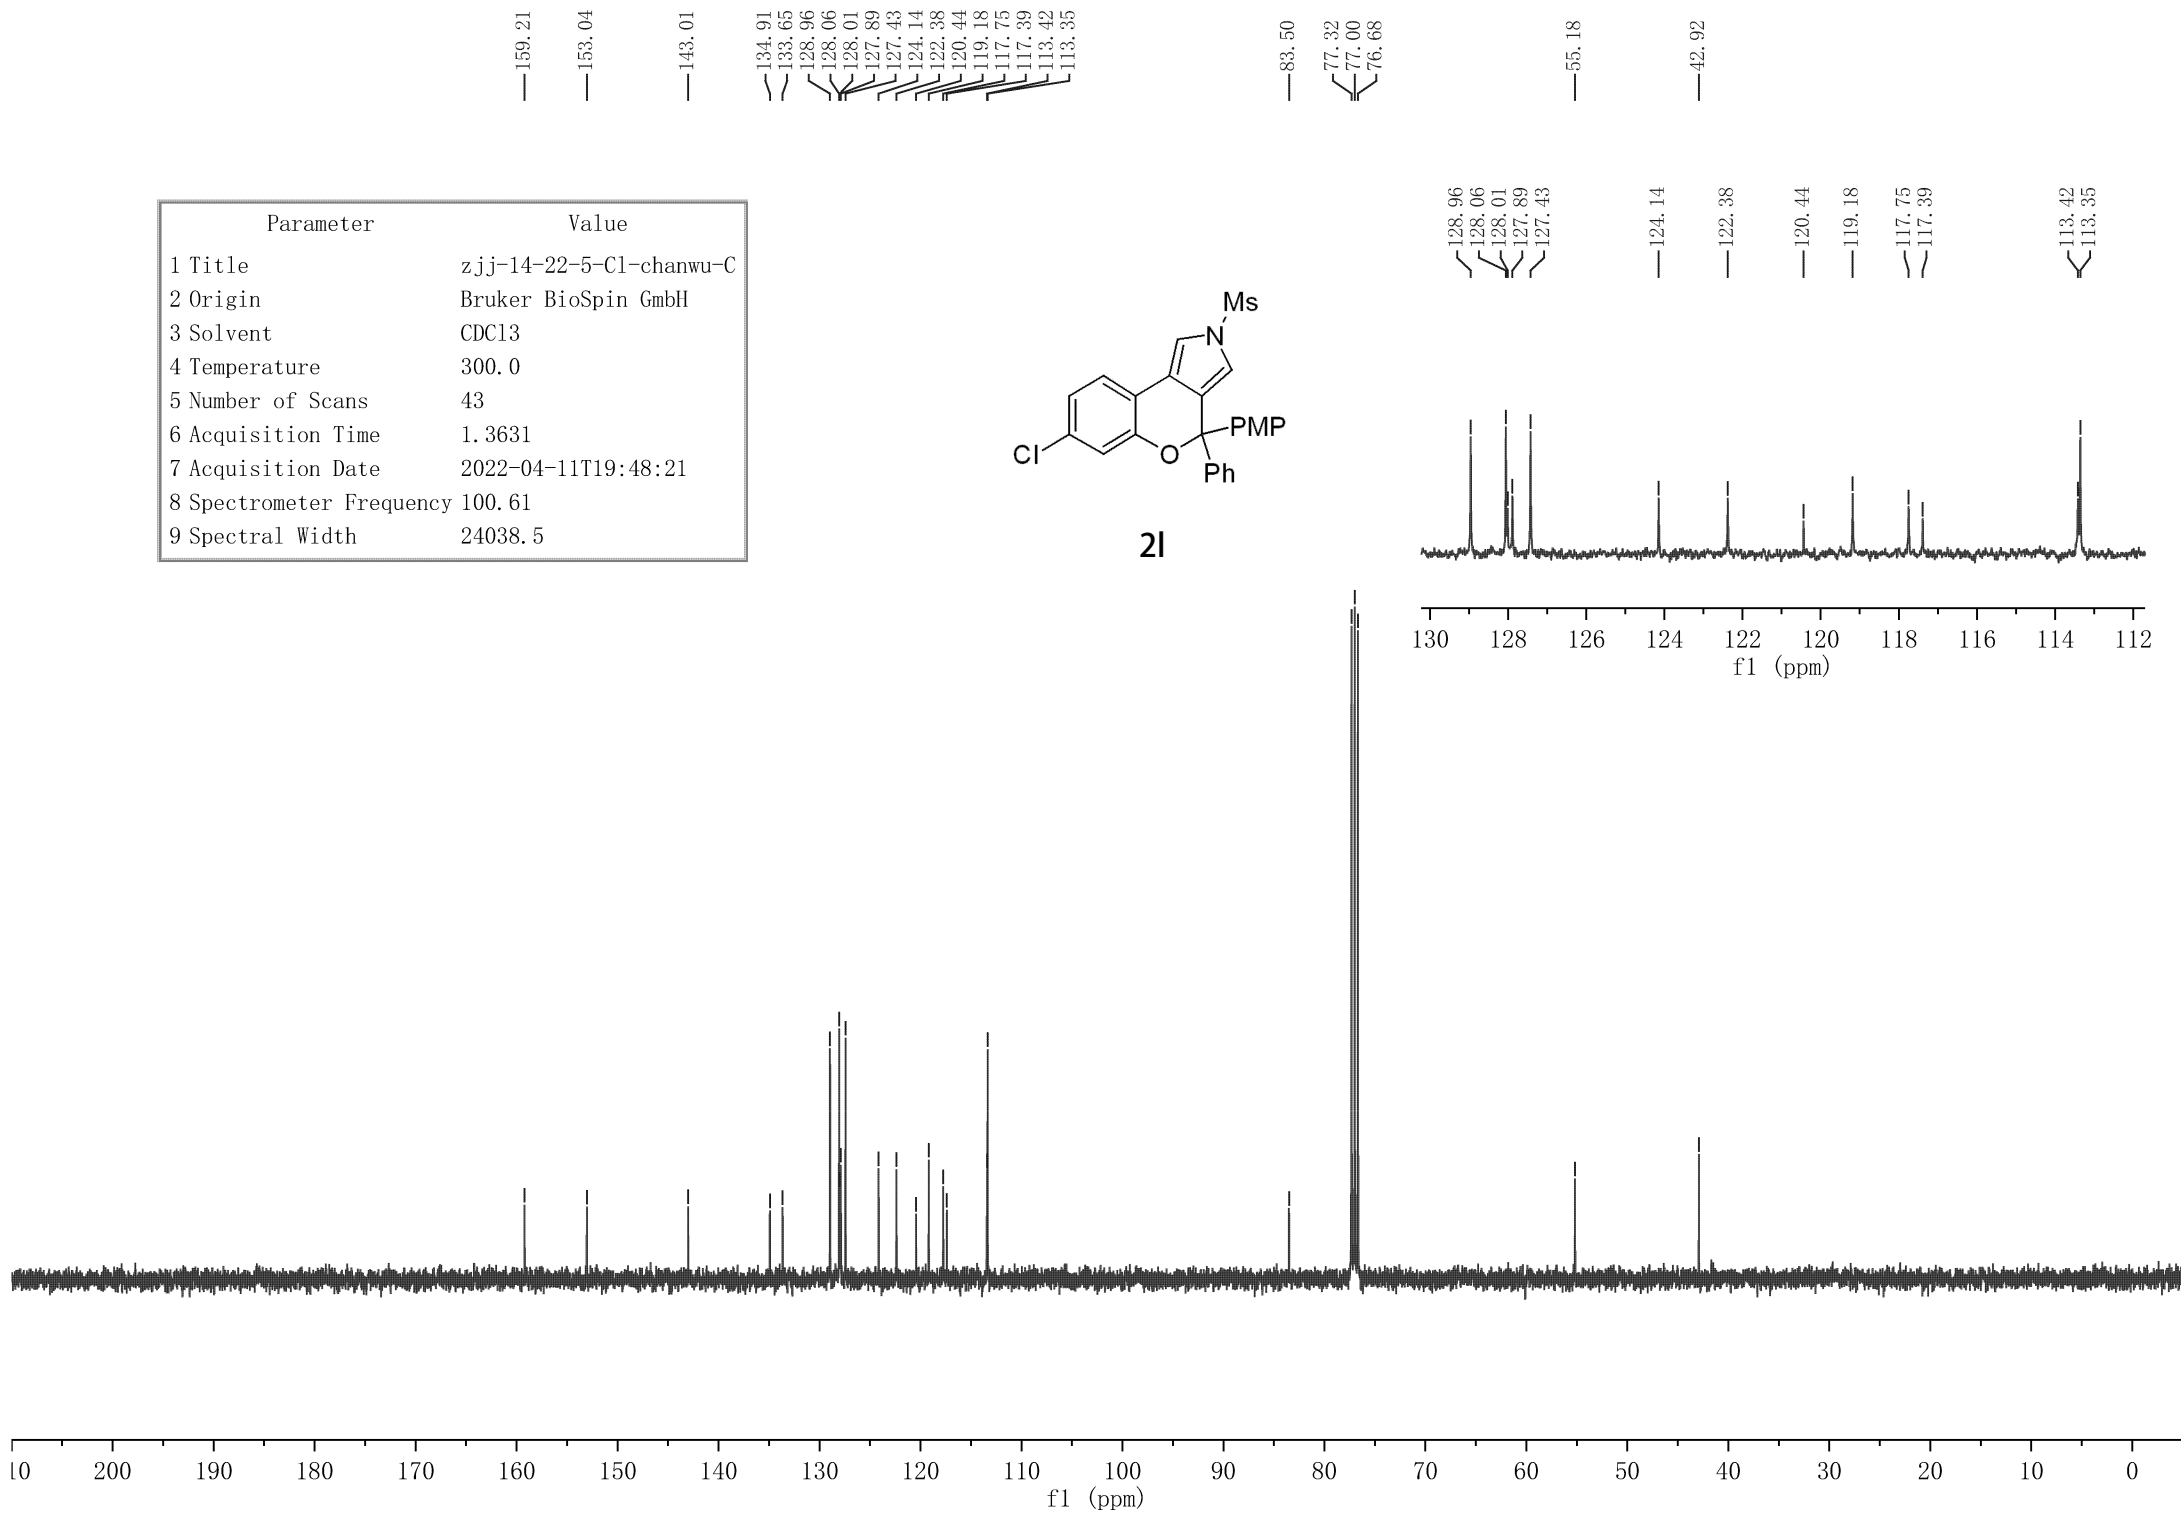

7.376  
7.371  
7.291  
7.253  
7.234  
7.213  
7.205  
7.200  
7.164  
7.141  
7.050  
7.045  
7.029  
7.025  
6.812  
6.790  
6.696  
6.691

| Parameter                | Value               |
|--------------------------|---------------------|
| 1 Title                  | LFS-2-123-H-2       |
| 2 Origin                 | Bruker BioSpin GmbH |
| 3 Solvent                | CDC13               |
| 4 Temperature            | 298.0               |
| 5 Number of Scans        | 17                  |
| 6 Acquisition Time       | 4.0894              |
| 7 Acquisition Date       | 2022-04-01T08:54:13 |
| 8 Spectrometer Frequency | 400.13              |
| 9 Spectral Width         | 8012.8              |

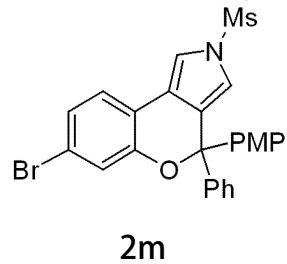

3.769

3.172

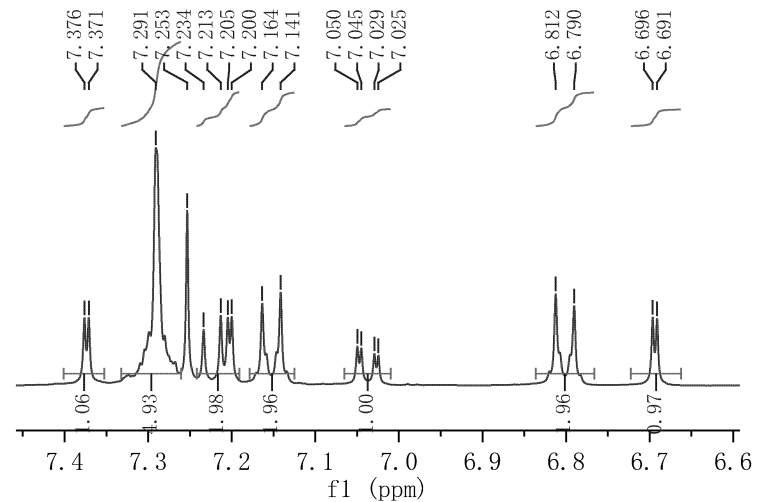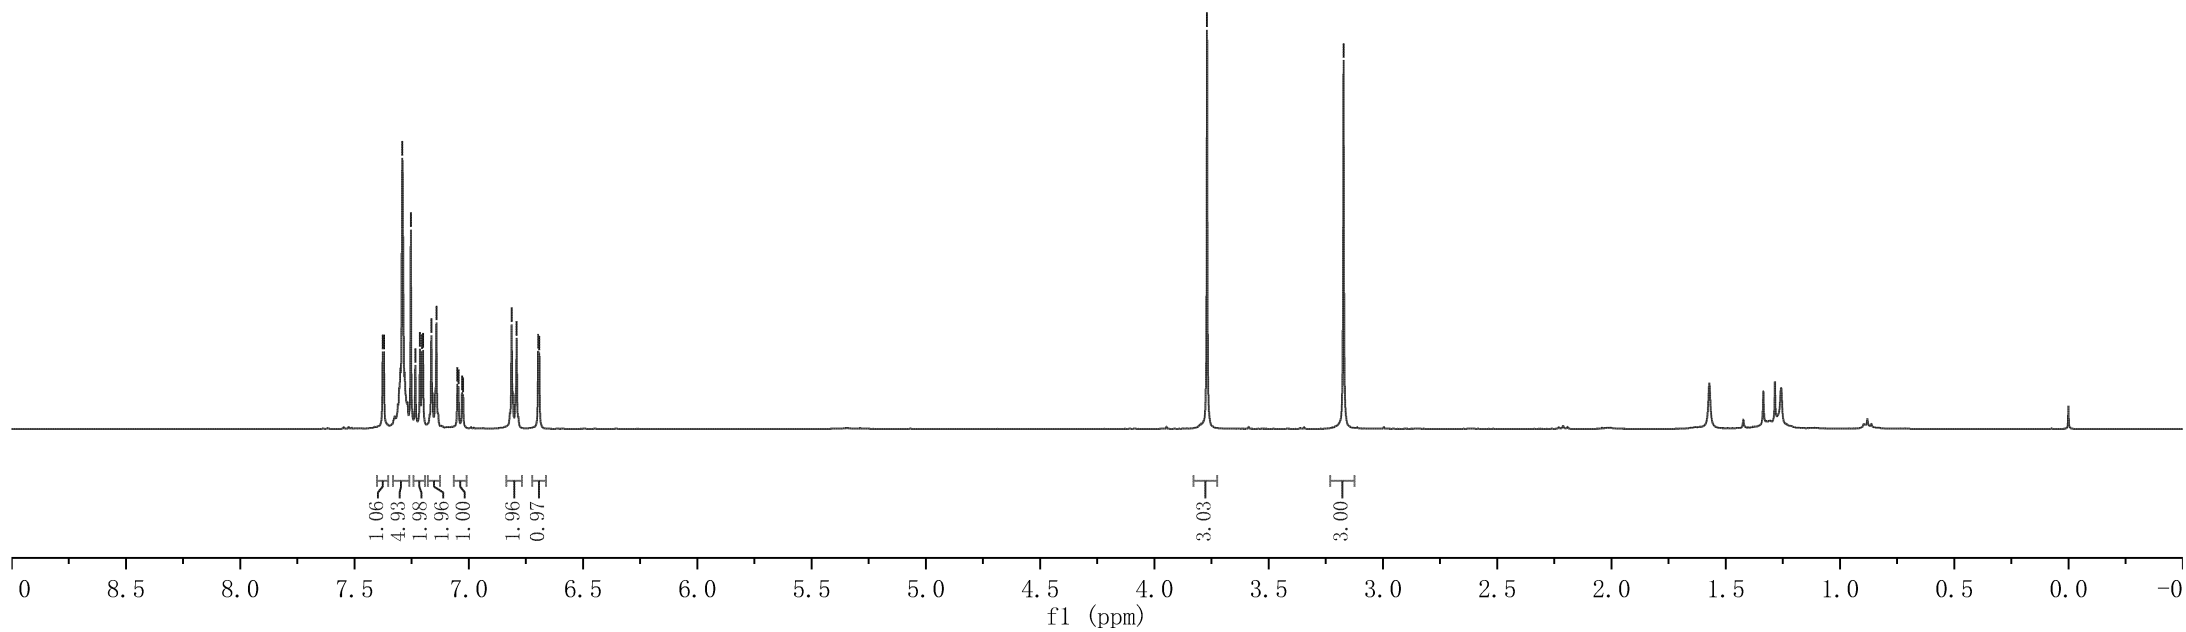

| Parameter                | Value               |
|--------------------------|---------------------|
| 1 Title                  | LFS-2-123-C-2       |
| 2 Origin                 | Bruker BioSpin GmbH |
| 3 Solvent                | CDC13               |
| 4 Temperature            | 300.0               |
| 5 Number of Scans        | 140                 |
| 6 Acquisition Time       | 1.3631              |
| 7 Acquisition Date       | 2022-04-01T08:56:50 |
| 8 Spectrometer Frequency | 100.61              |
| 9 Spectral Width         | 24038.5             |

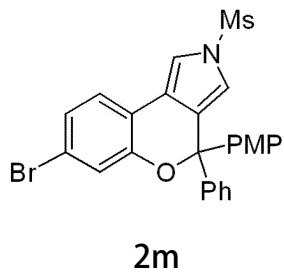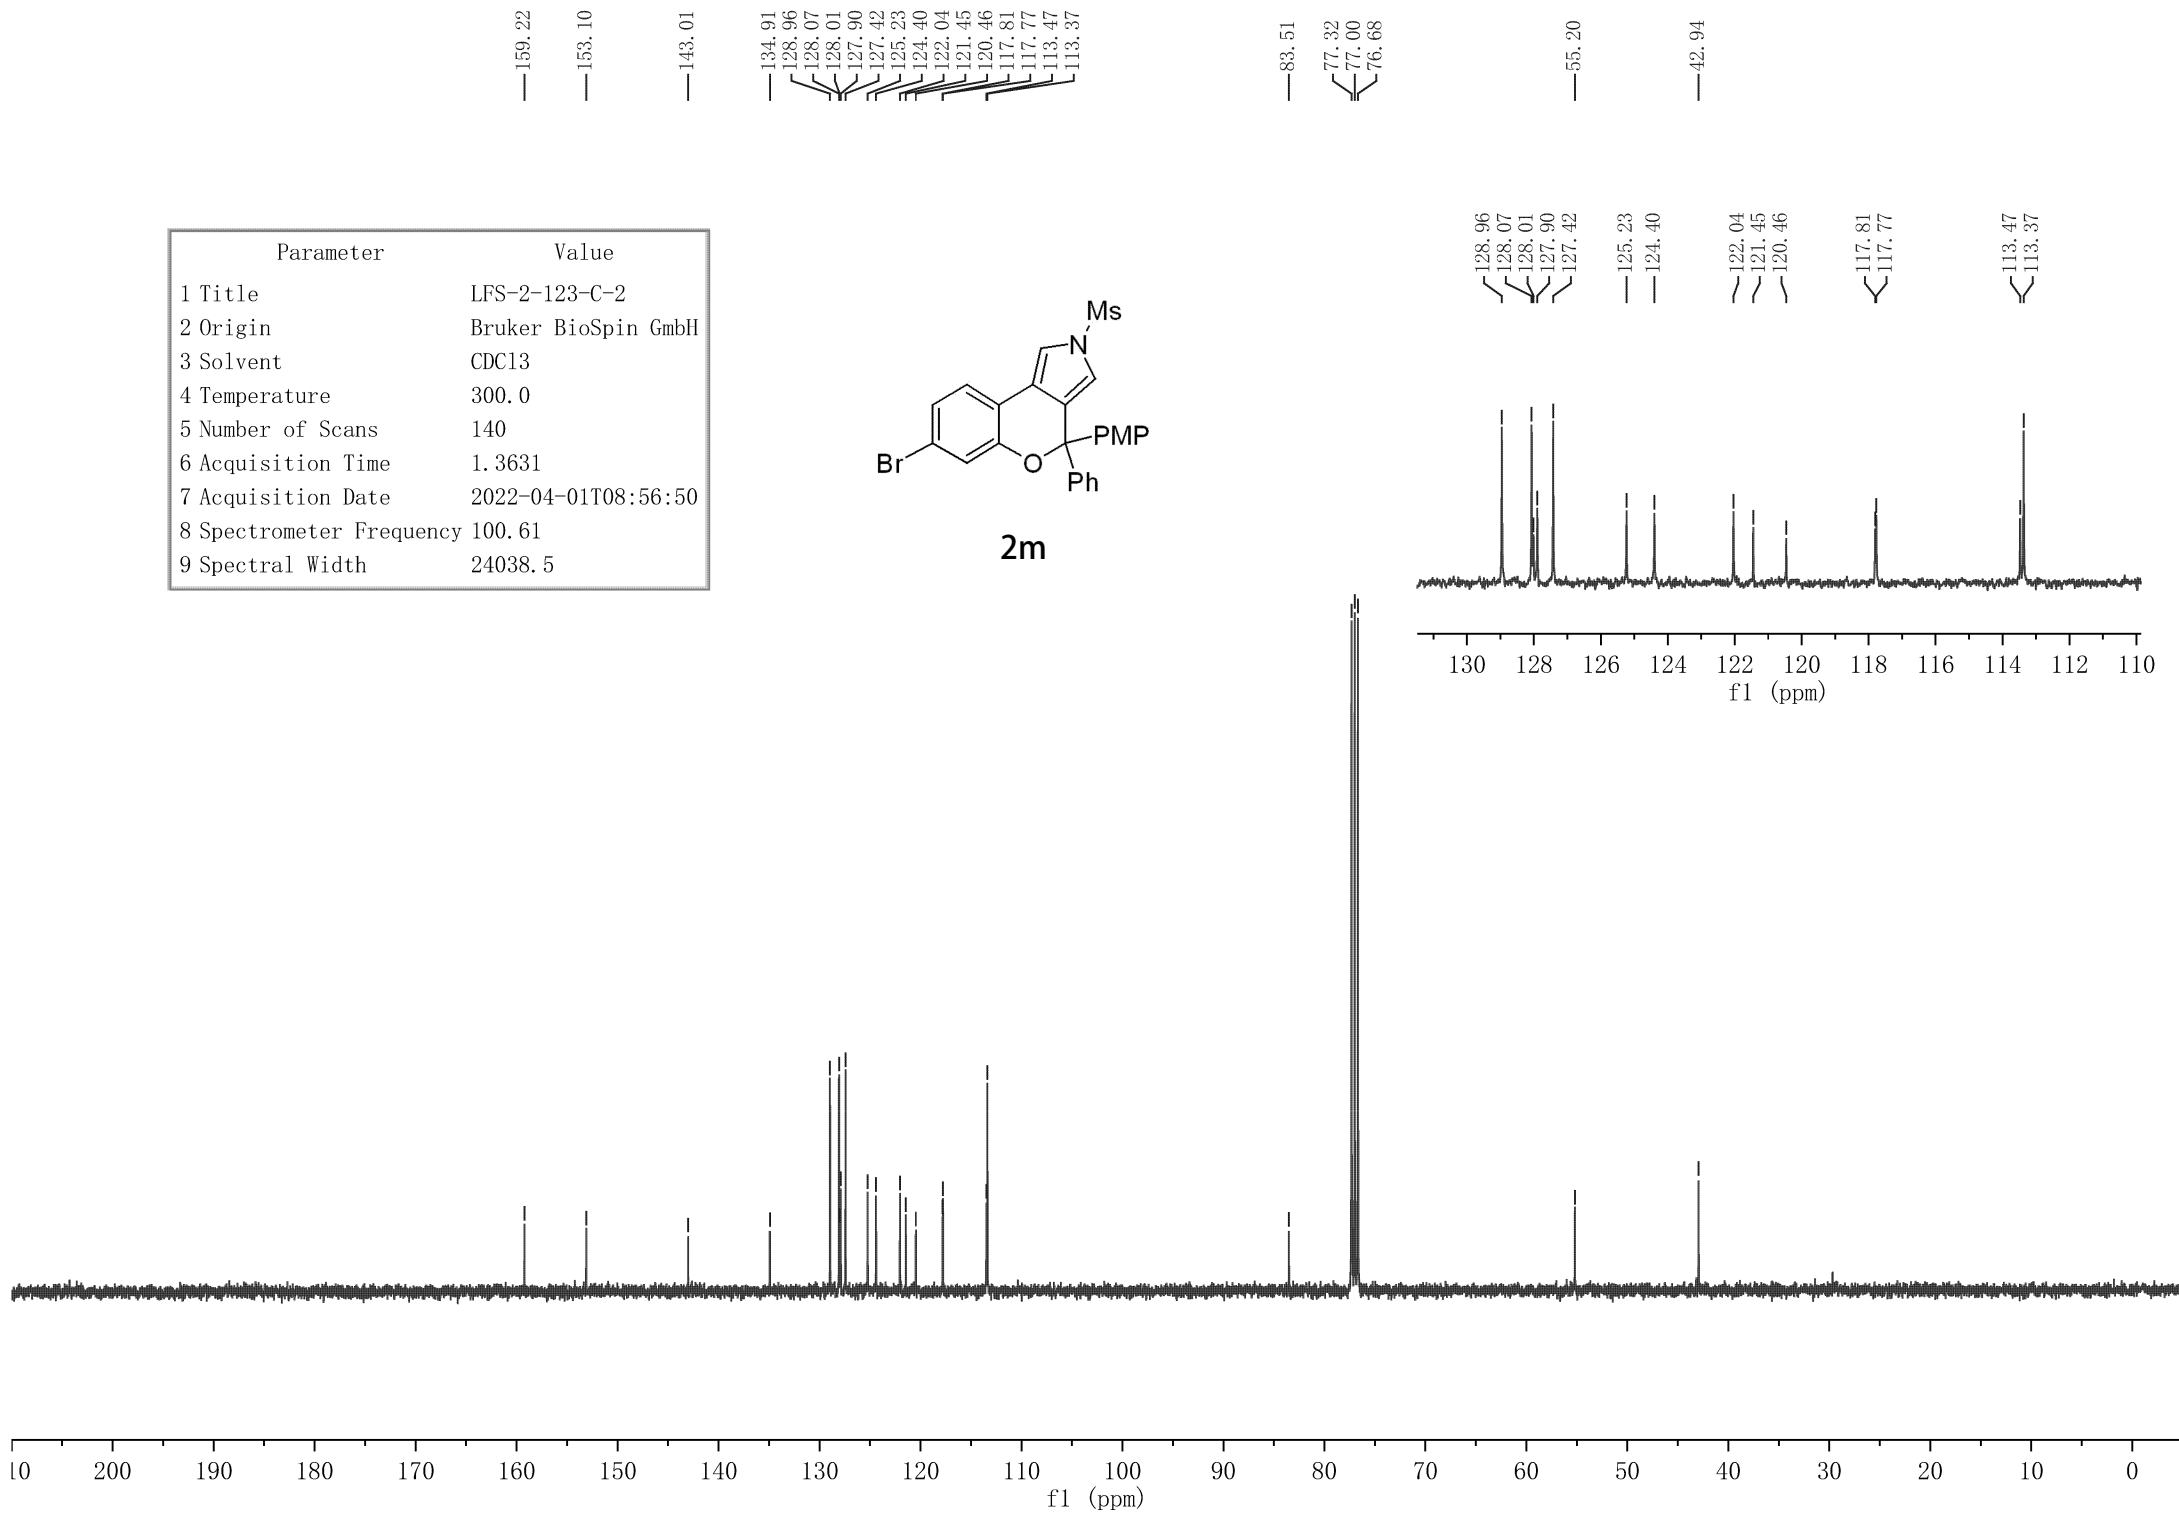

7.358  
7.353  
7.326  
7.306  
7.286  
7.256  
7.198  
7.176  
6.923  
6.800  
6.778  
6.688  
6.683

3.761

3.159

2.238

| Parameter                | Value                    |
|--------------------------|--------------------------|
| 1 Title                  | zjj-13-198-4-Me-diwu-H-3 |
| 2 Origin                 | Bruker BioSpin GmbH      |
| 3 Solvent                | CDCl3                    |
| 4 Temperature            | 298.0                    |
| 5 Number of Scans        | 12                       |
| 6 Acquisition Time       | 4.0894                   |
| 7 Acquisition Date       | 2022-02-25T17:00:41      |
| 8 Spectrometer Frequency | 400.13                   |
| 9 Spectral Width         | 8012.8                   |

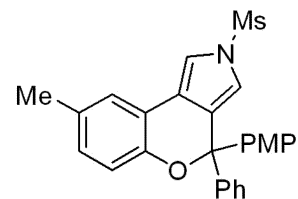

2n

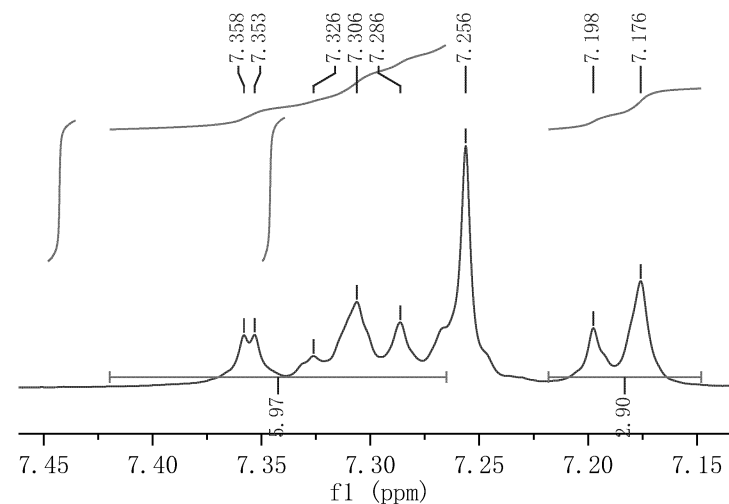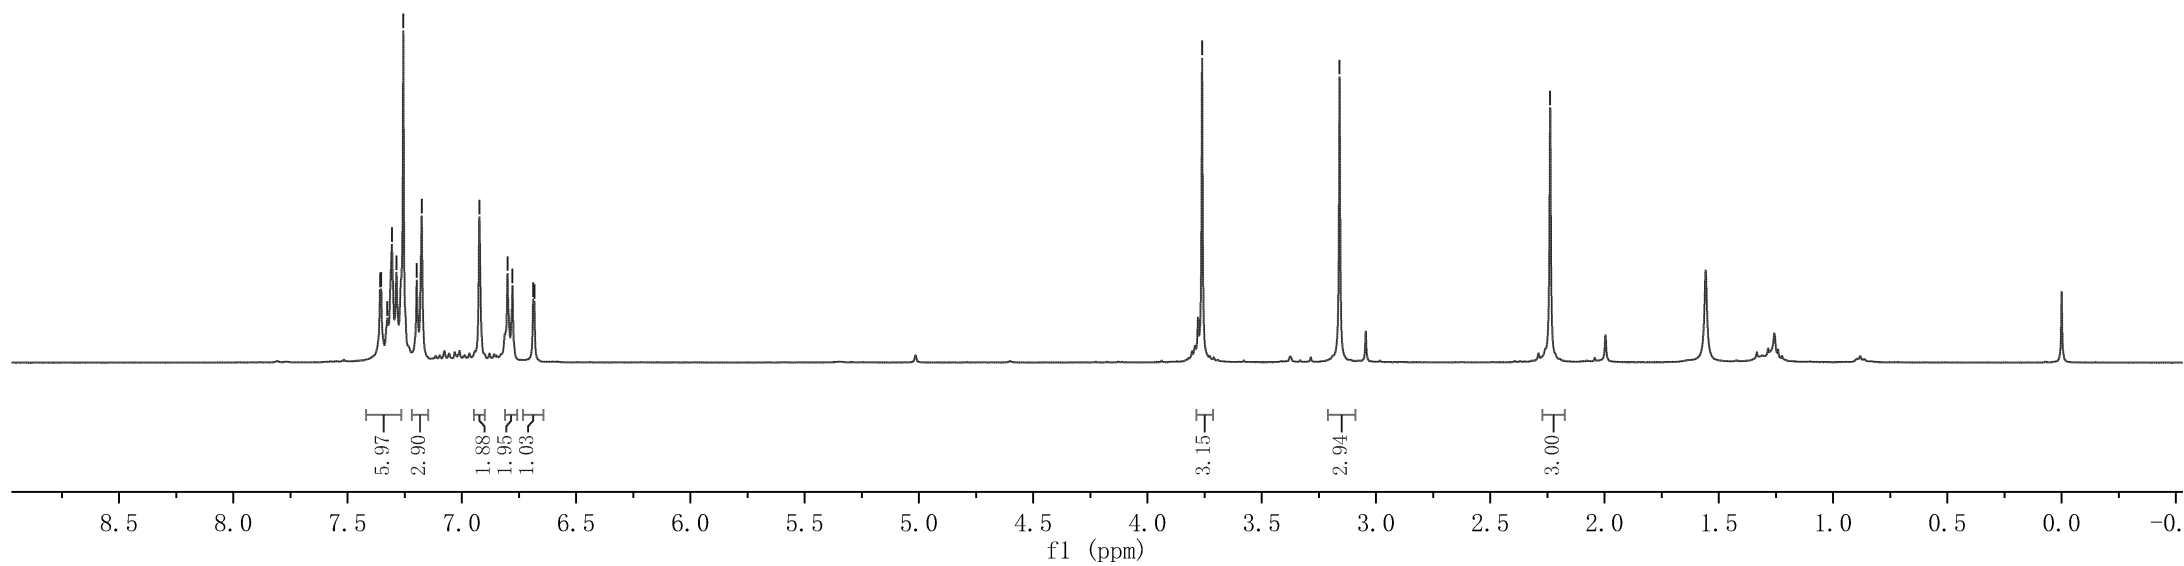

| Parameter                | Value               |
|--------------------------|---------------------|
| 1 Title                  | zjj-13-198-C        |
| 2 Origin                 | Bruker BioSpin GmbH |
| 3 Solvent                | CDC13               |
| 4 Temperature            | 300.0               |
| 5 Number of Scans        | 204                 |
| 6 Acquisition Time       | 1.3631              |
| 7 Acquisition Date       | 2022-02-25T17:02:19 |
| 8 Spectrometer Frequency | 100.61              |
| 9 Spectral Width         | 24038.5             |

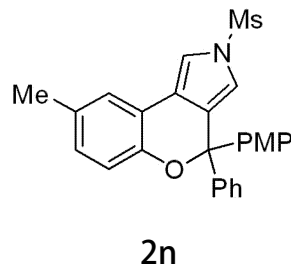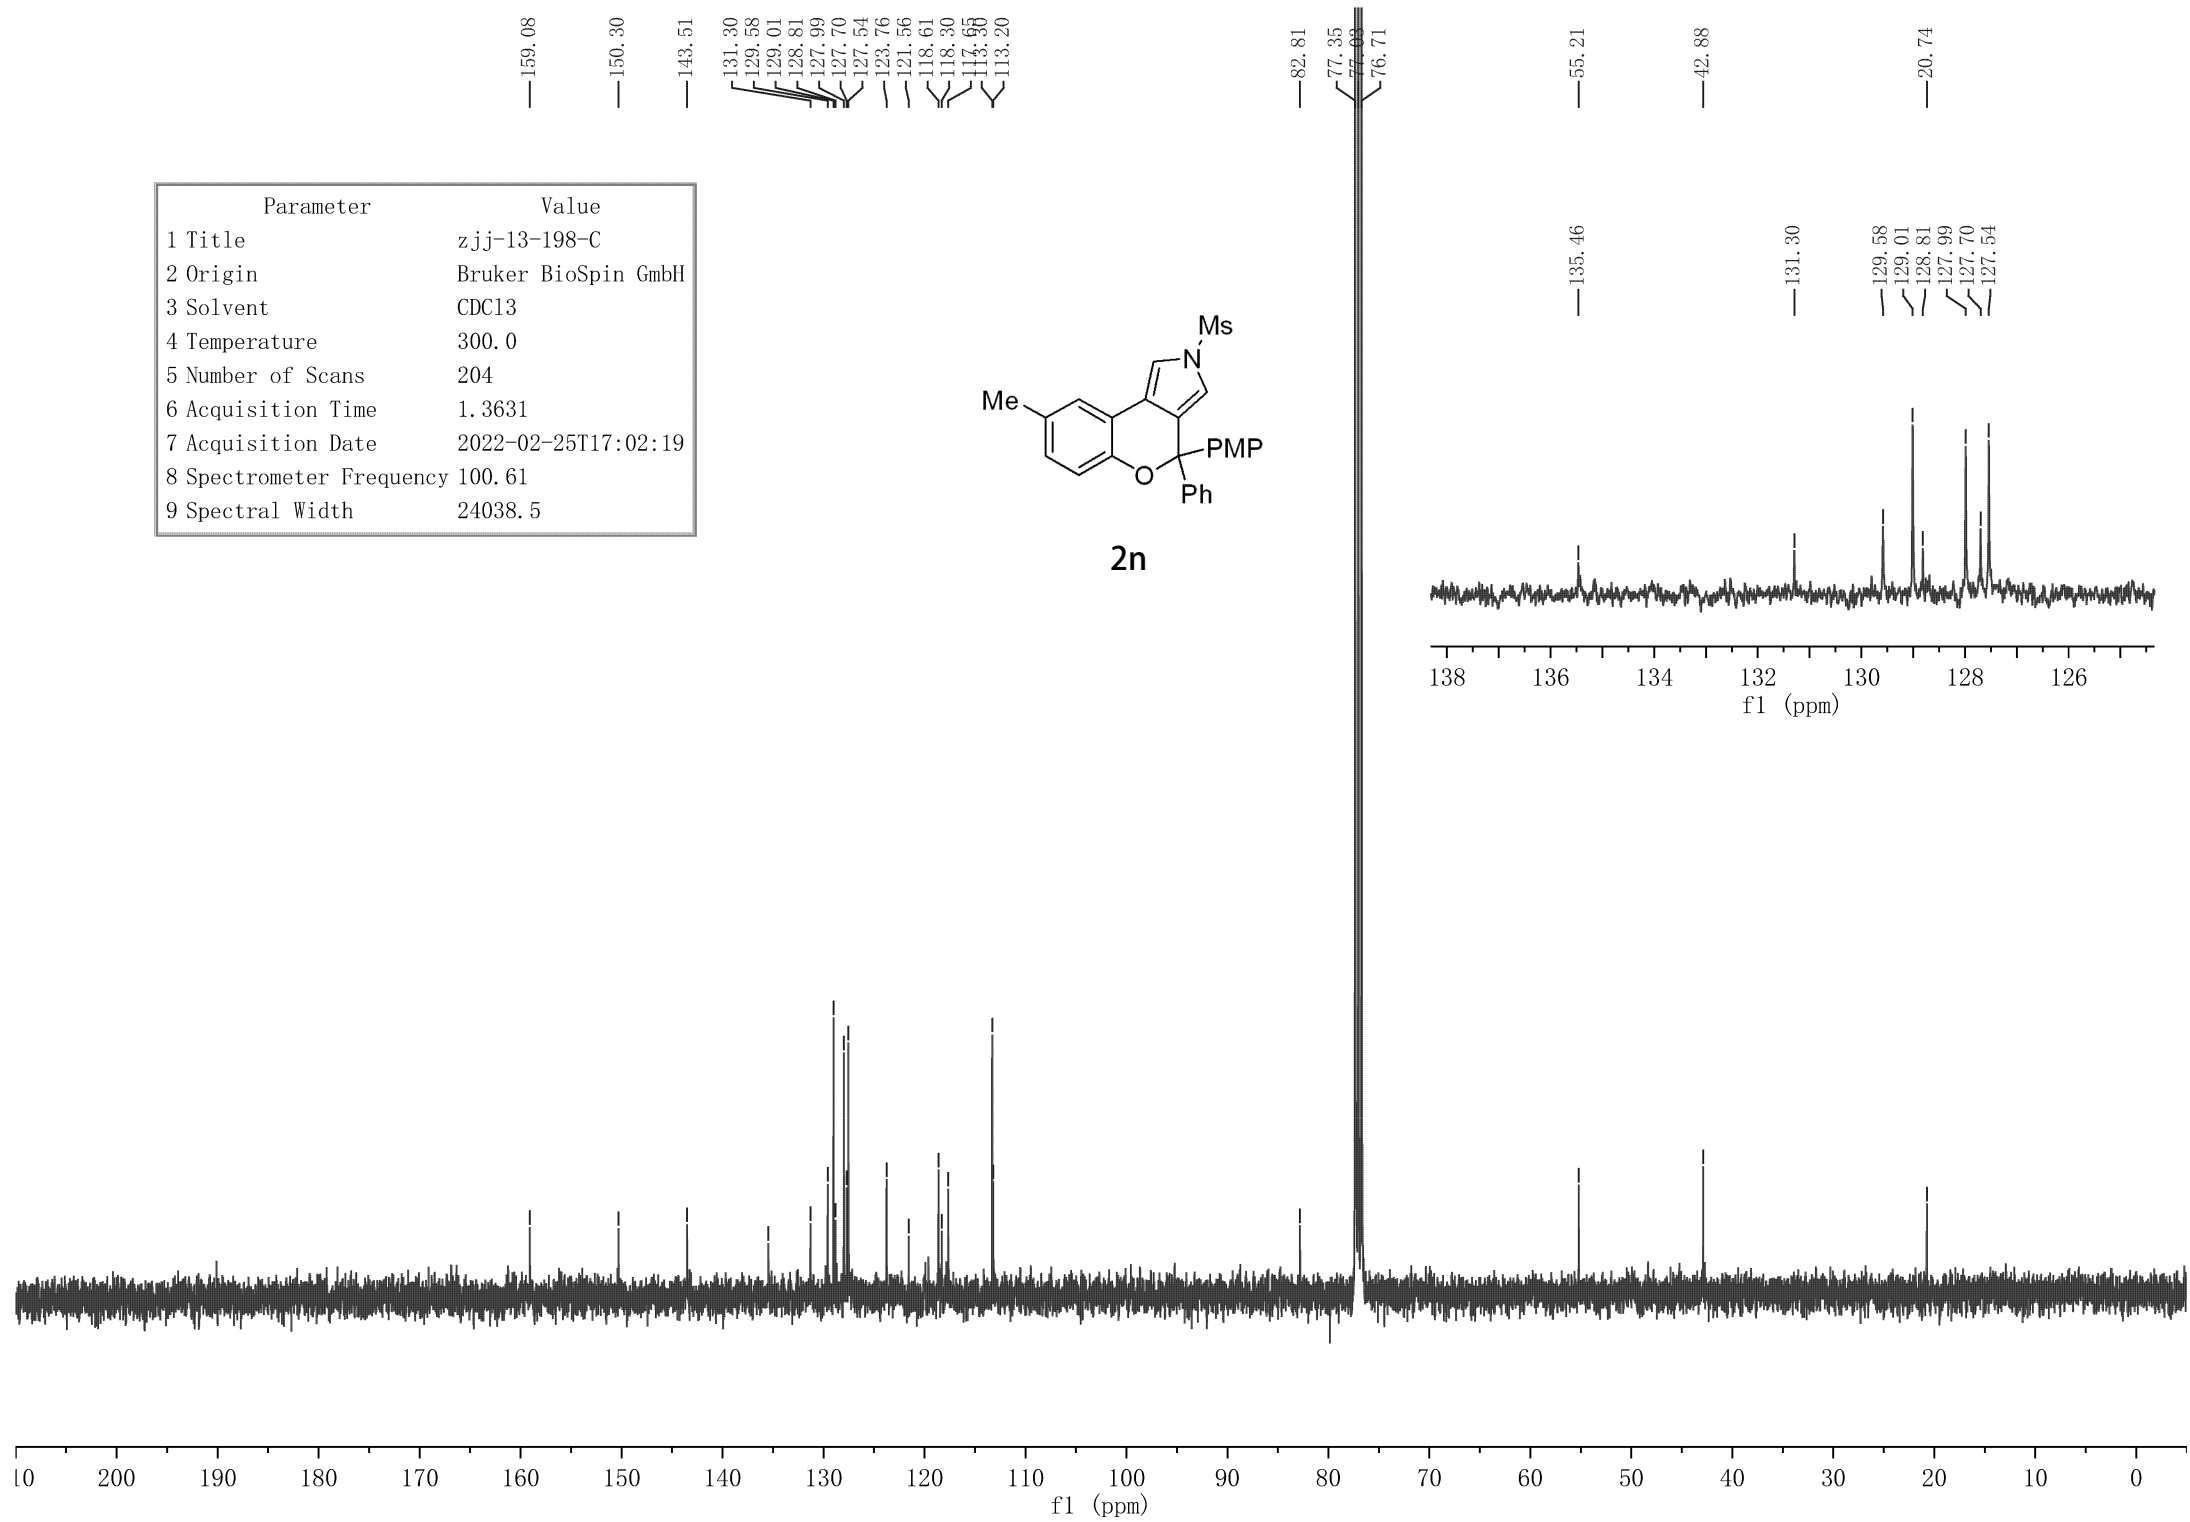

7.366  
7.292  
7.272  
7.267  
7.242  
7.181  
7.159  
7.055  
7.048  
7.034  
7.027  
6.983  
6.971  
6.961  
6.949  
6.803  
6.782  
6.706

3.753  
3.158

| Parameter                | Value               |
|--------------------------|---------------------|
| 1 Title                  | LFS-2-114-H         |
| 2 Origin                 | Bruker BioSpin GmbH |
| 3 Solvent                | CDCl3               |
| 4 Temperature            | 298.0               |
| 5 Number of Scans        | 21                  |
| 6 Acquisition Time       | 4.0894              |
| 7 Acquisition Date       | 2022-03-16T14:21:36 |
| 8 Spectrometer Frequency | 400.13              |
| 9 Spectral Width         | 8012.8              |

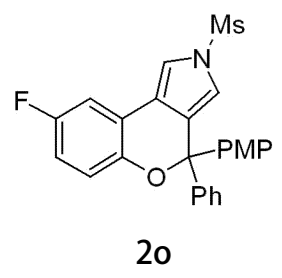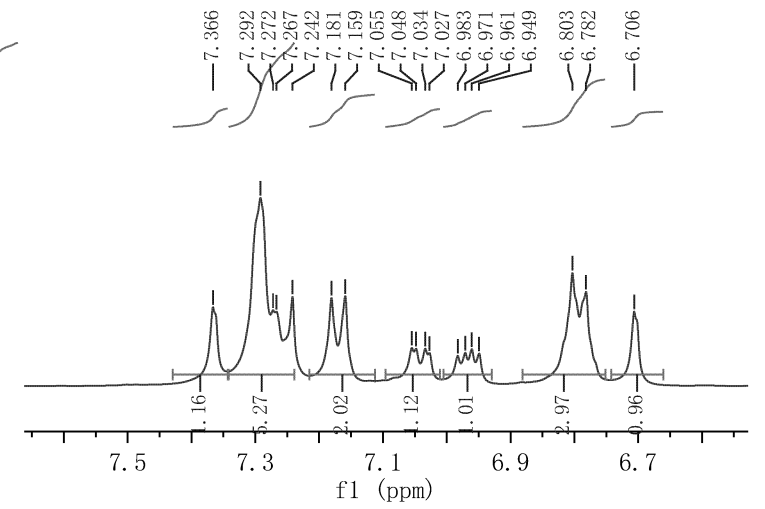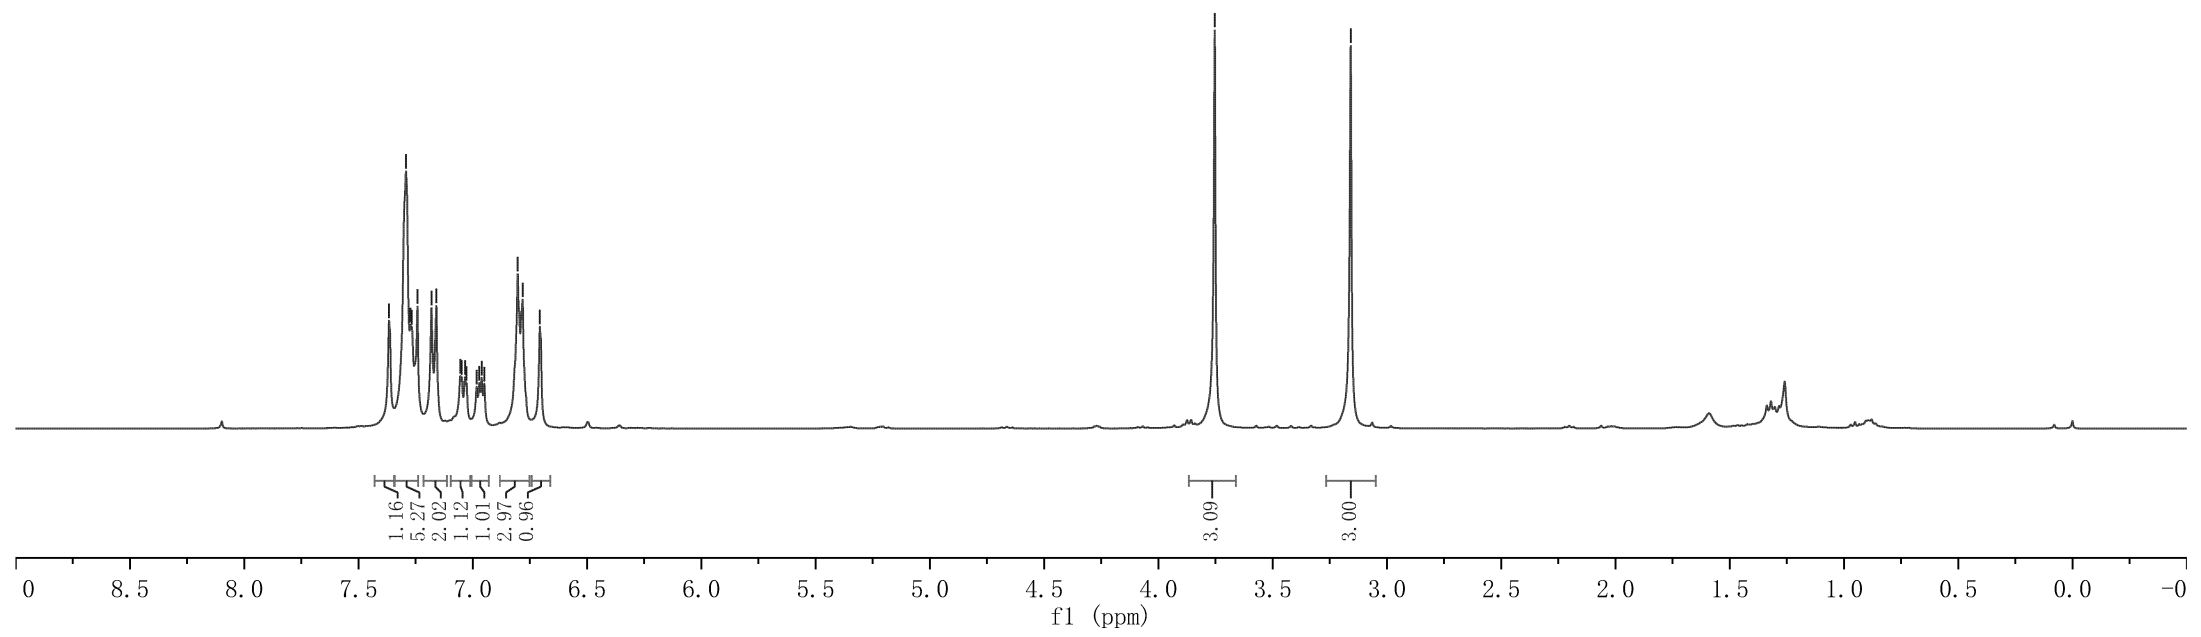

| Parameter                | Value               |
|--------------------------|---------------------|
| 1 Title                  | LFS-2-114-C         |
| 2 Origin                 | Bruker BioSpin GmbH |
| 3 Solvent                | CDCl3               |
| 4 Temperature            | 300.0               |
| 5 Number of Scans        | 160                 |
| 6 Acquisition Time       | 1.3631              |
| 7 Acquisition Date       | 2022-03-16T14:24:16 |
| 8 Spectrometer Frequency | 100.61              |
| 9 Spectral Width         | 24038.5             |

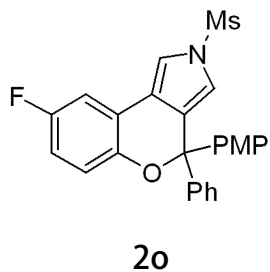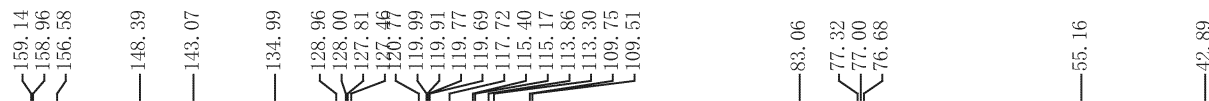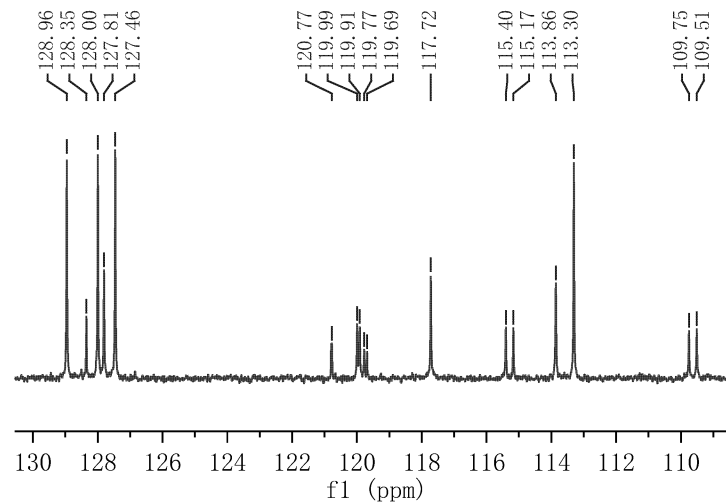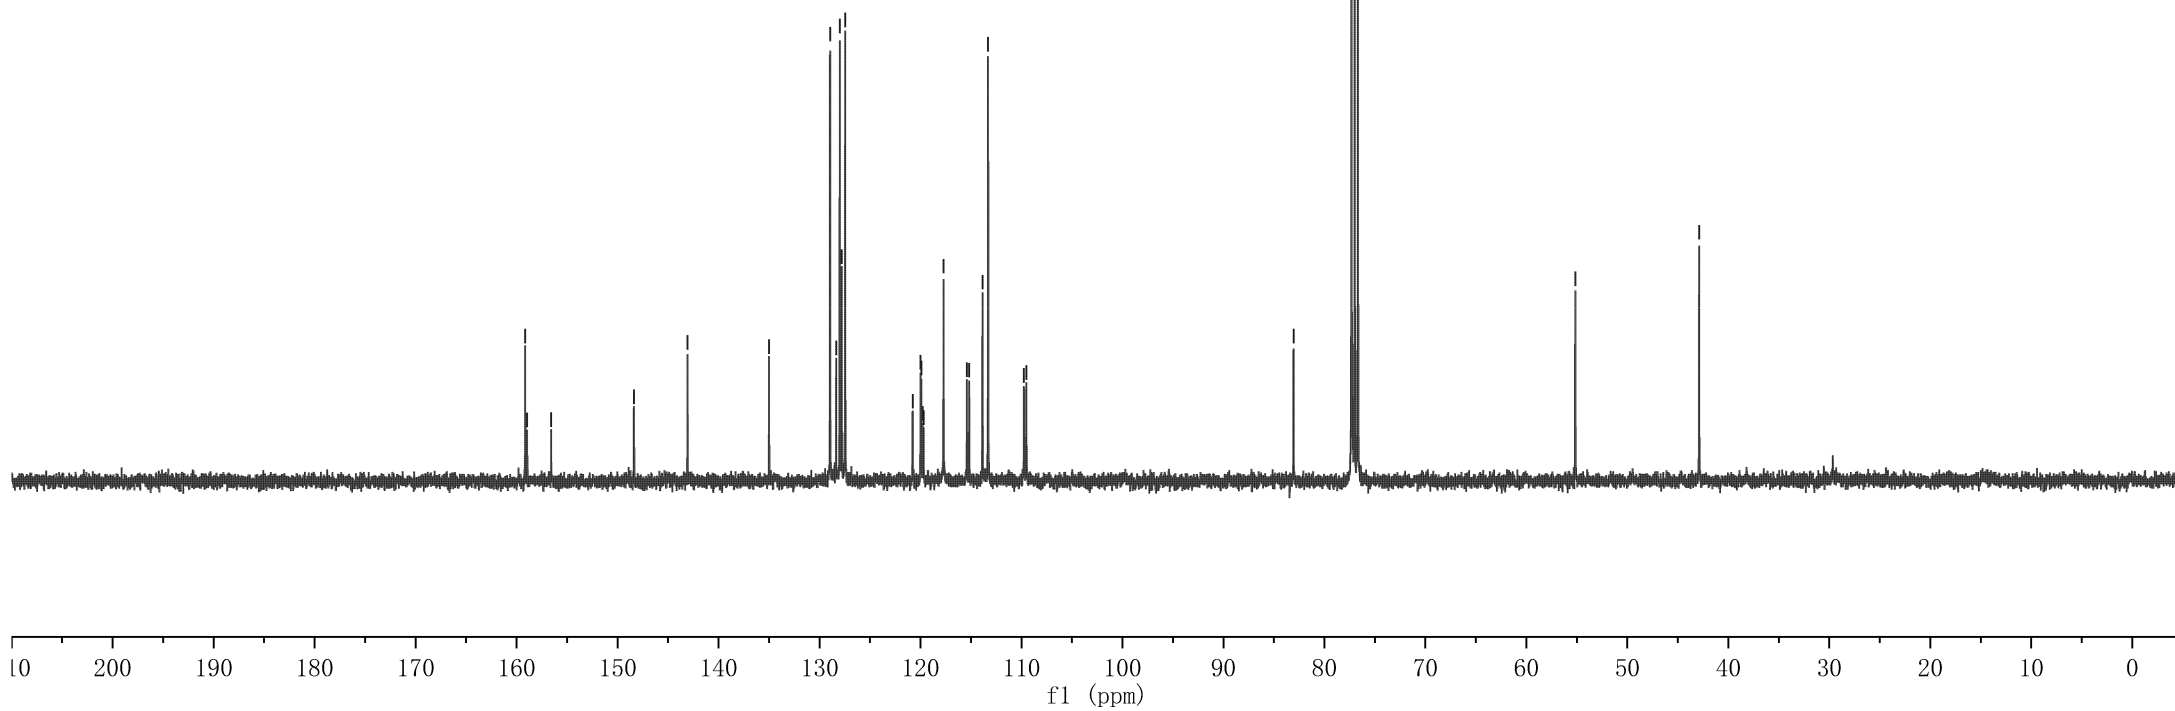

| Parameter                | Value               |
|--------------------------|---------------------|
| 1 Title                  | zjj-14-4-F          |
| 2 Origin                 | Bruker BioSpin GmbH |
| 3 Solvent                | CDC13               |
| 4 Temperature            | 295.4               |
| 5 Number of Scans        | 16                  |
| 6 Acquisition Time       | 0.7340              |
| 7 Acquisition Date       | 2022-04-08T10:24:26 |
| 8 Spectrometer Frequency | 376.31              |
| 9 Spectral Width         | 89285.7             |

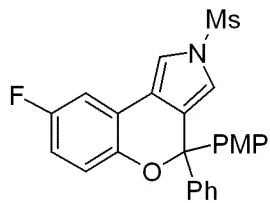

2o

-121.18

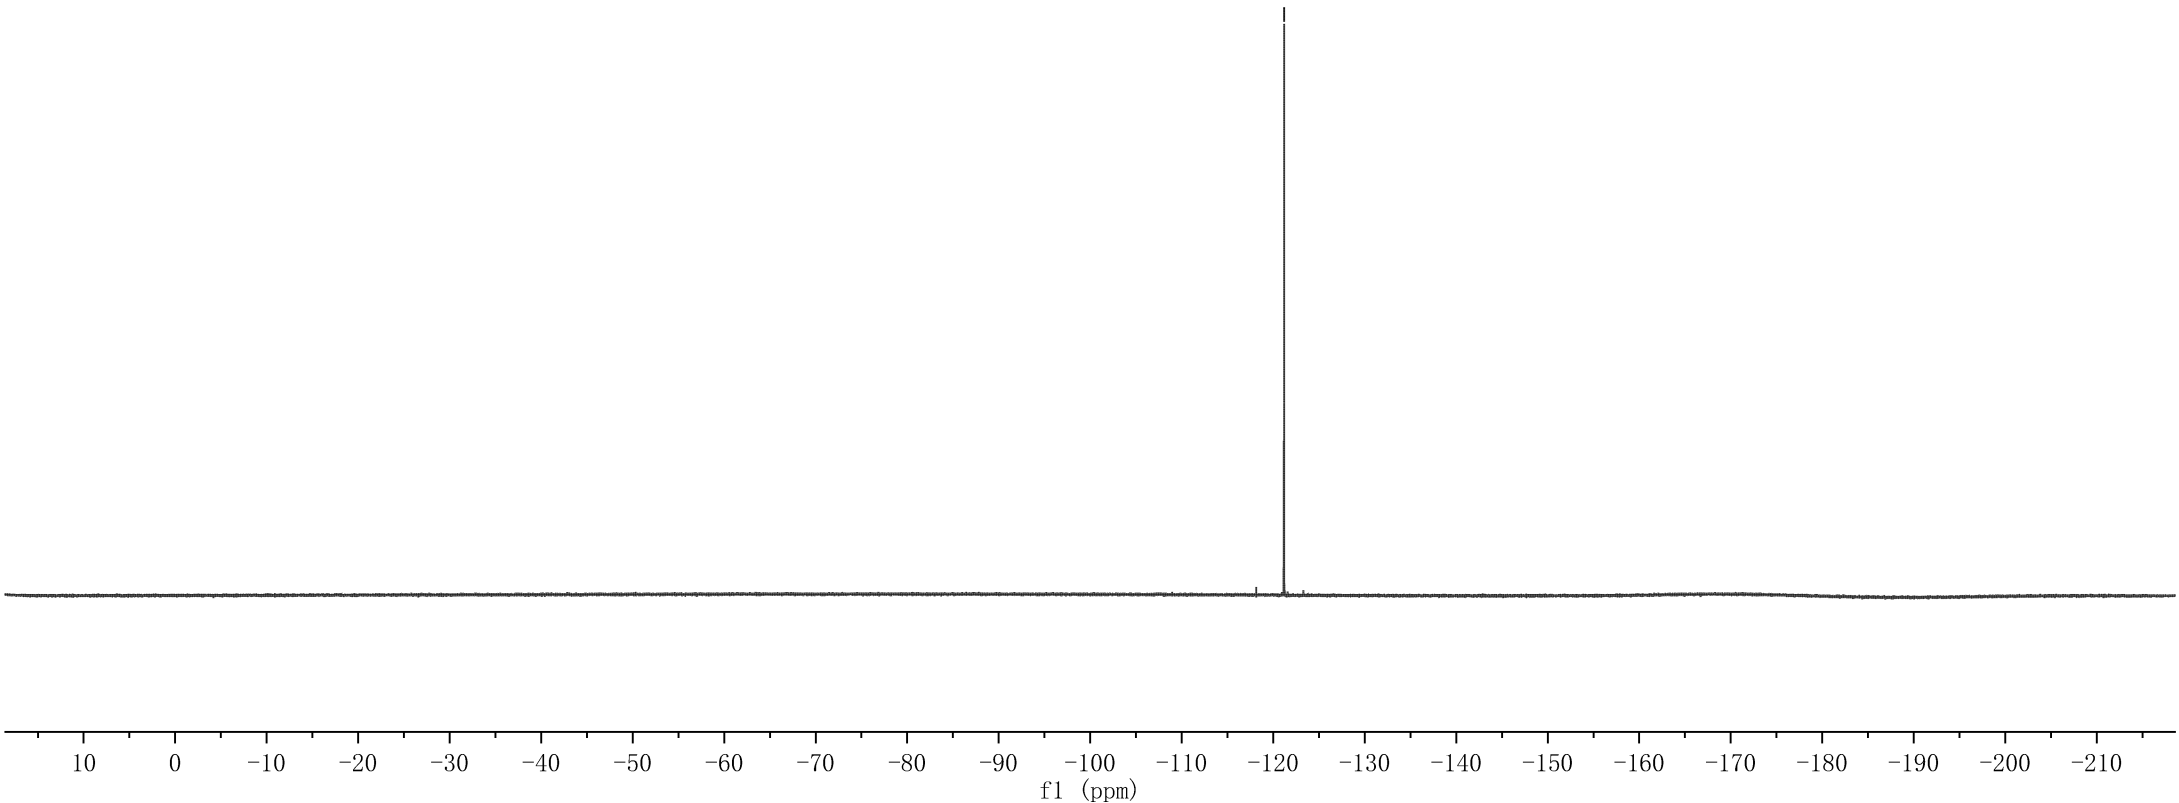



7.382  
7.377  
7.340  
7.334  
7.290  
7.252  
7.171  
7.149  
7.067  
7.061  
7.045  
7.040  
6.969  
6.947  
6.807  
6.785  
6.706  
6.701

3.765

3.176

| Parameter                | Value               |
|--------------------------|---------------------|
| 1 Title                  | LFS-2-124-H-2       |
| 2 Origin                 | Bruker BioSpin GmbH |
| 3 Solvent                | CDCl3               |
| 4 Temperature            | 298.0               |
| 5 Number of Scans        | 14                  |
| 6 Acquisition Time       | 4.0894              |
| 7 Acquisition Date       | 2022-04-01T08:43:14 |
| 8 Spectrometer Frequency | 400.13              |
| 9 Spectral Width         | 8012.8              |

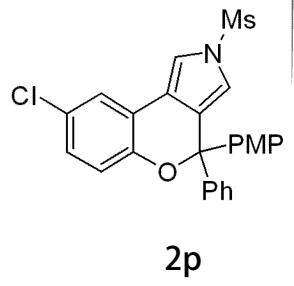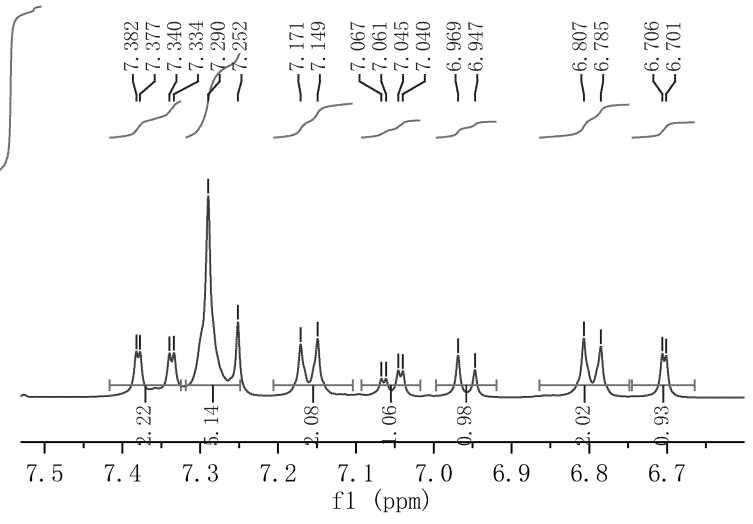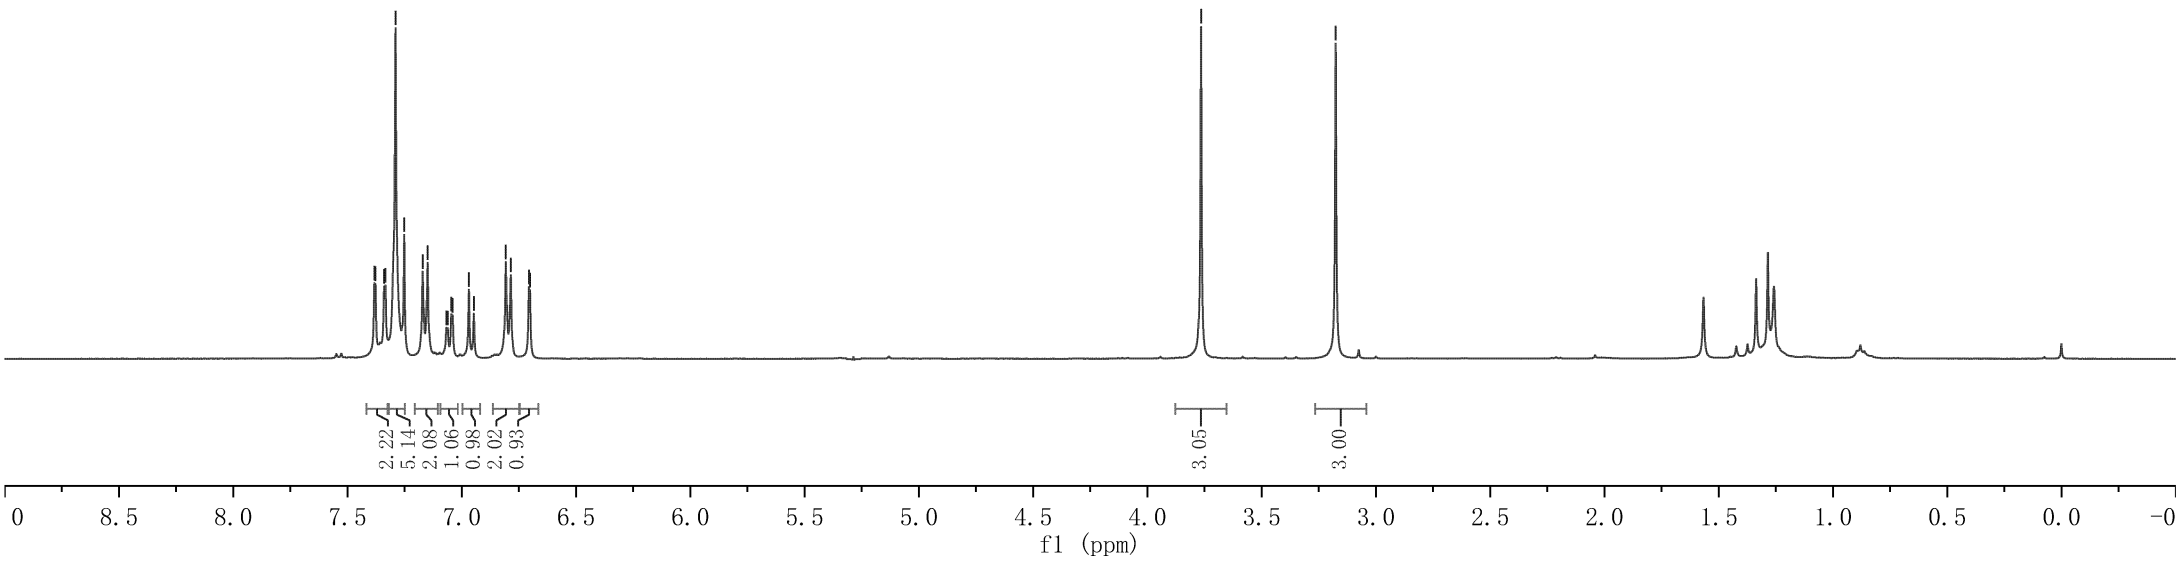

| Parameter                | Value               |
|--------------------------|---------------------|
| 1 Title                  | LFS-2-124-C-2       |
| 2 Origin                 | Bruker BioSpin GmbH |
| 3 Solvent                | CDC13               |
| 4 Temperature            | 300.0               |
| 5 Number of Scans        | 91                  |
| 6 Acquisition Time       | 1.3631              |
| 7 Acquisition Date       | 2022-04-01T08:45:37 |
| 8 Spectrometer Frequency | 100.61              |
| 9 Spectral Width         | 24038.5             |

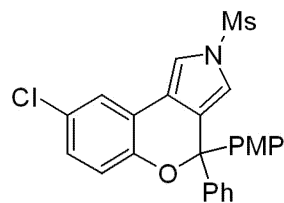

2p

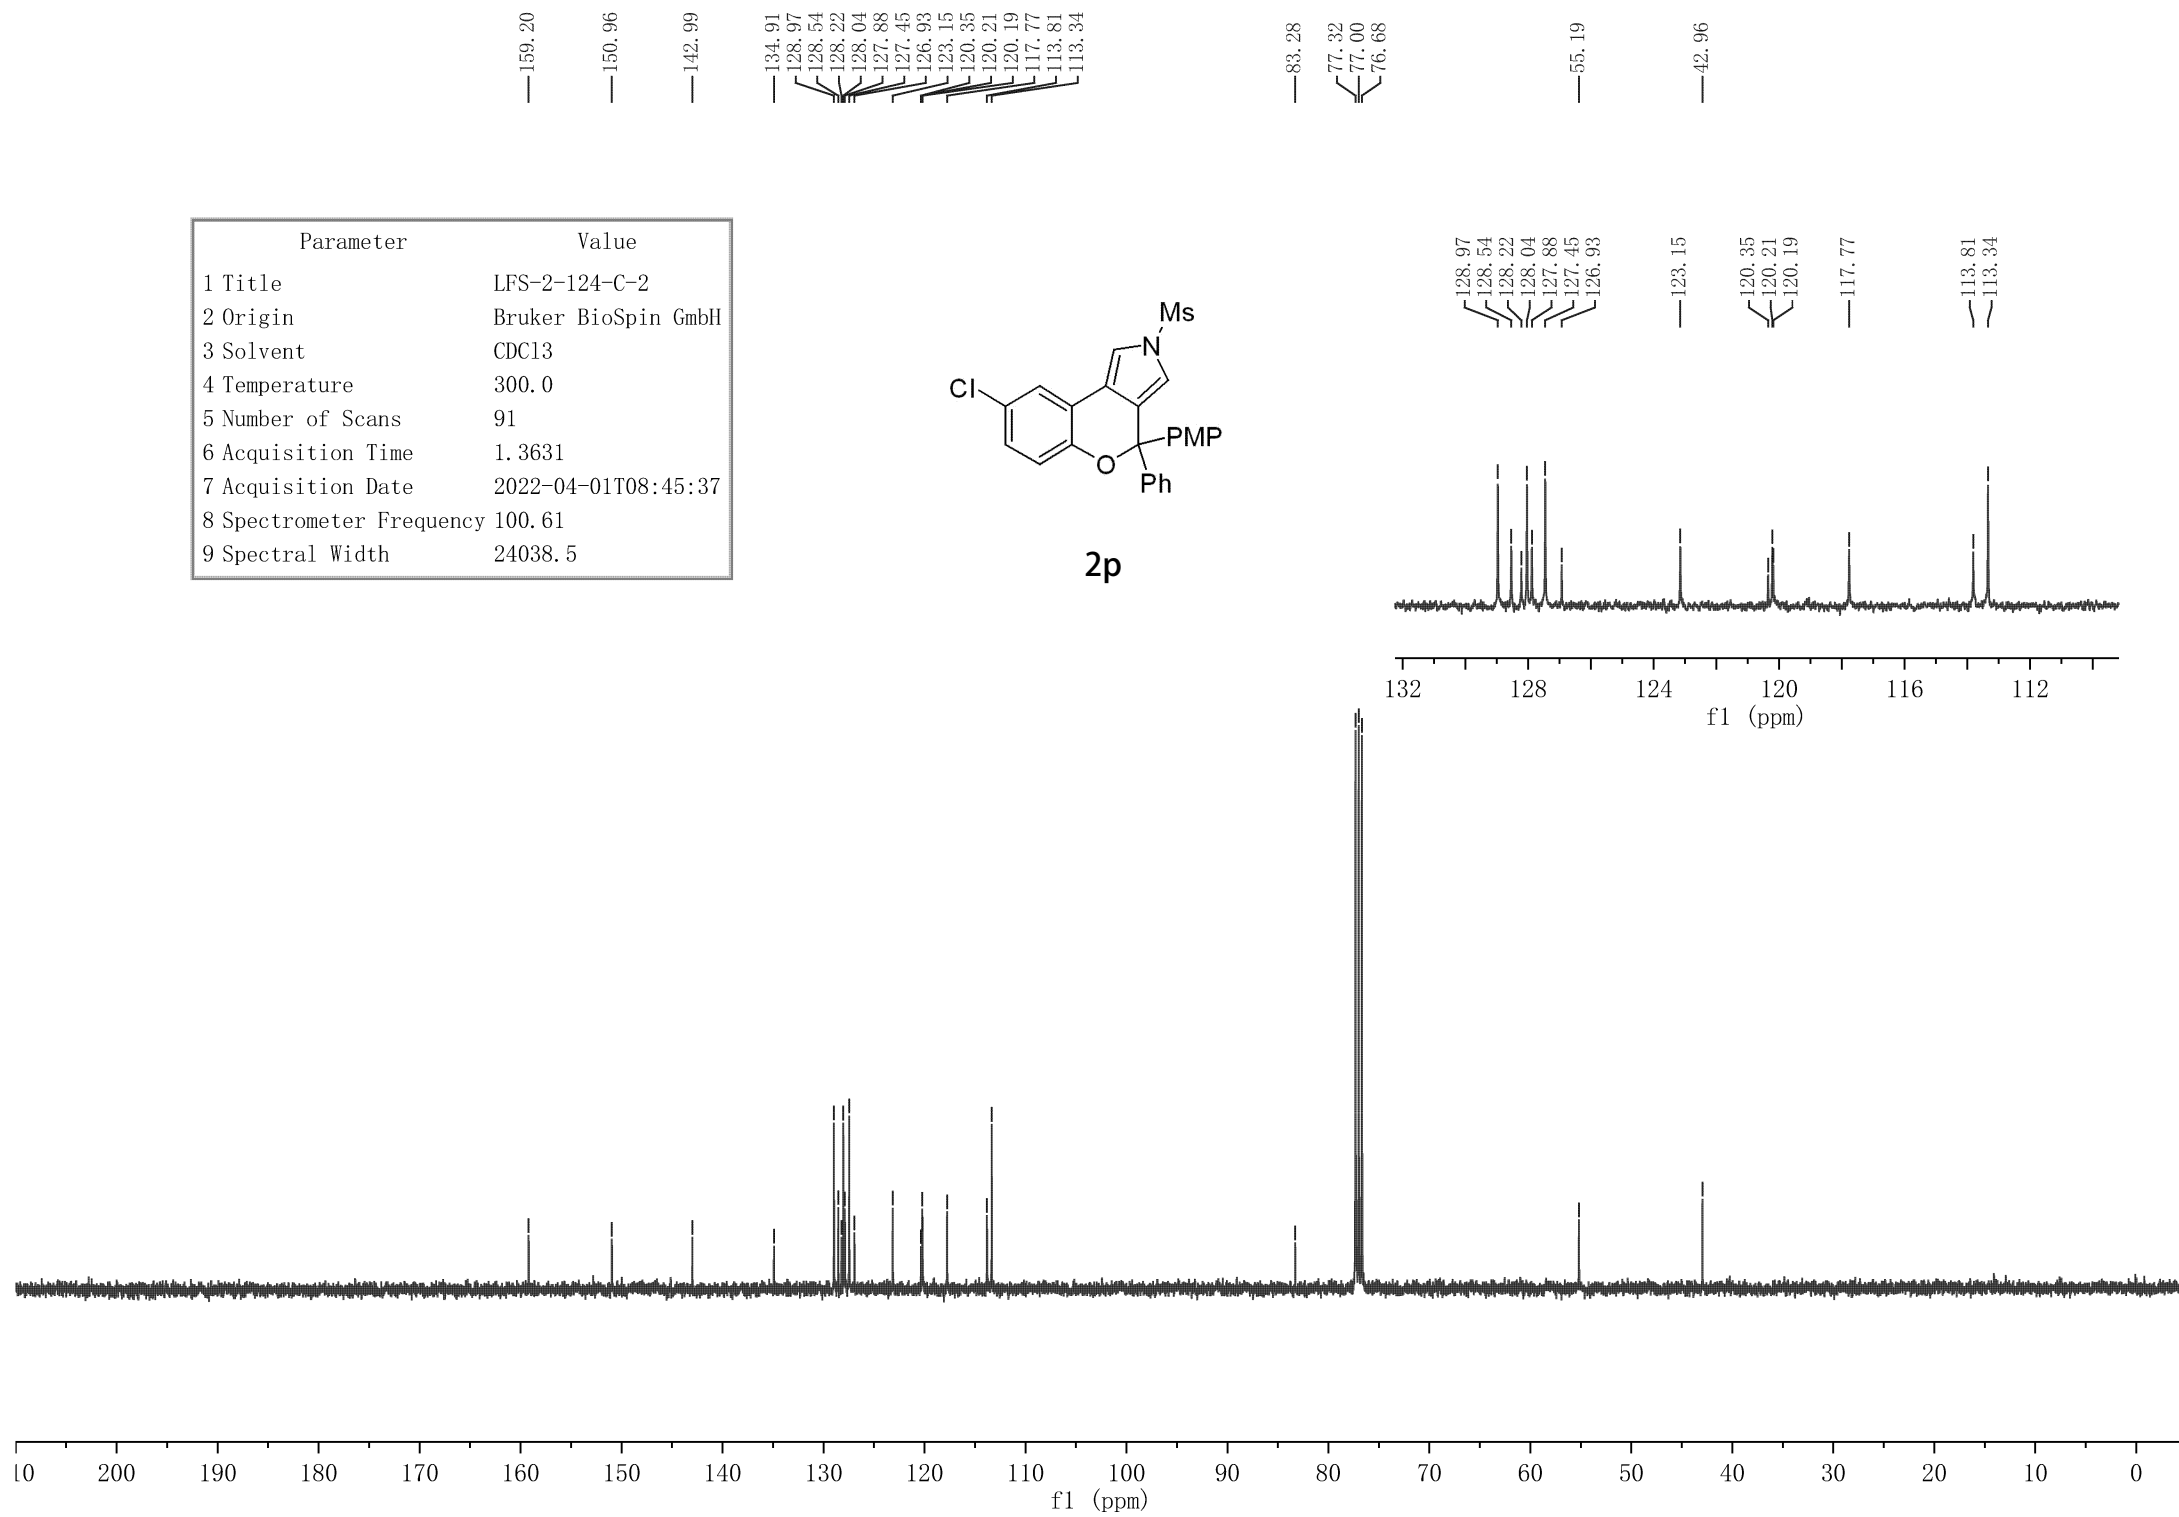

7.487  
7.482  
7.381  
7.376  
7.288  
7.253  
7.206  
7.200  
7.184  
7.179  
7.167  
7.145  
6.918  
6.896  
6.806  
6.784  
6.703  
6.698

| Parameter                | Value               |
|--------------------------|---------------------|
| 1 Title                  | ZJJ-13-206-4-Br-H   |
| 2 Origin                 | Bruker BioSpin GmbH |
| 3 Solvent                | CDCl <sub>3</sub>   |
| 4 Temperature            | 298.0               |
| 5 Number of Scans        | 9                   |
| 6 Acquisition Time       | 4.0894              |
| 7 Acquisition Date       | 2022-03-03T17:02:16 |
| 8 Spectrometer Frequency | 400.13              |
| 9 Spectral Width         | 8012.8              |

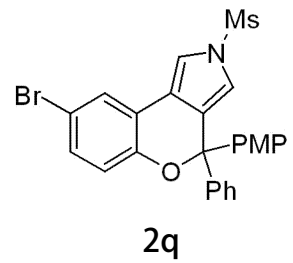

3.766  
3.176

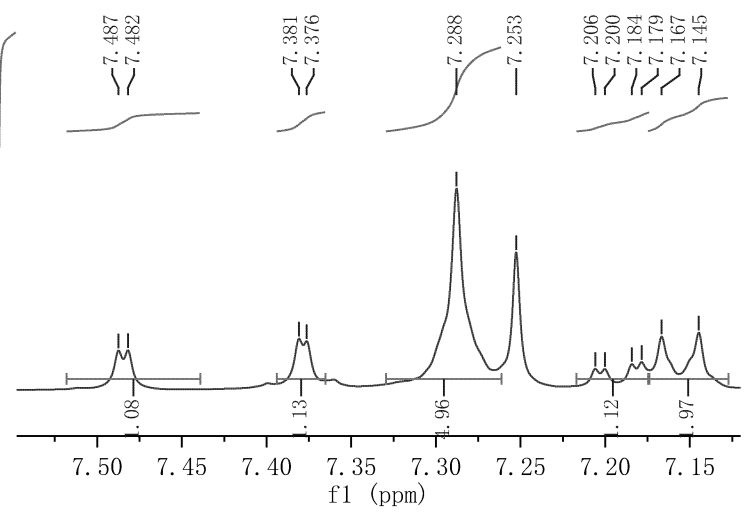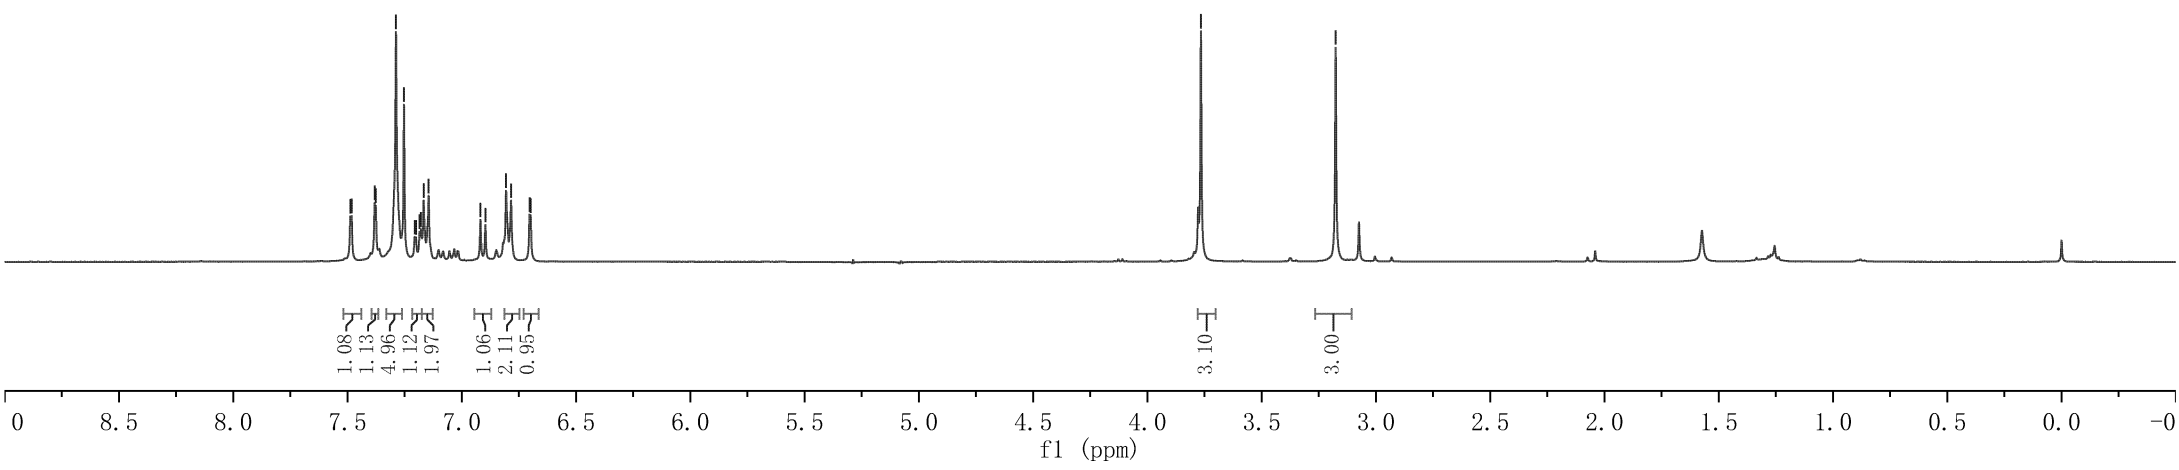

| Parameter                | Value               |
|--------------------------|---------------------|
| 1 Title                  | ZJJ-13-206-4-Br-C   |
| 2 Origin                 | Bruker BioSpin GmbH |
| 3 Solvent                | CDC13               |
| 4 Temperature            | 300.0               |
| 5 Number of Scans        | 115                 |
| 6 Acquisition Time       | 1.3631              |
| 7 Acquisition Date       | 2022-03-03T17:03:49 |
| 8 Spectrometer Frequency | 100.61              |
| 9 Spectral Width         | 24038.5             |

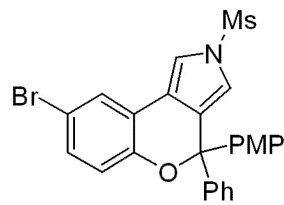

2q

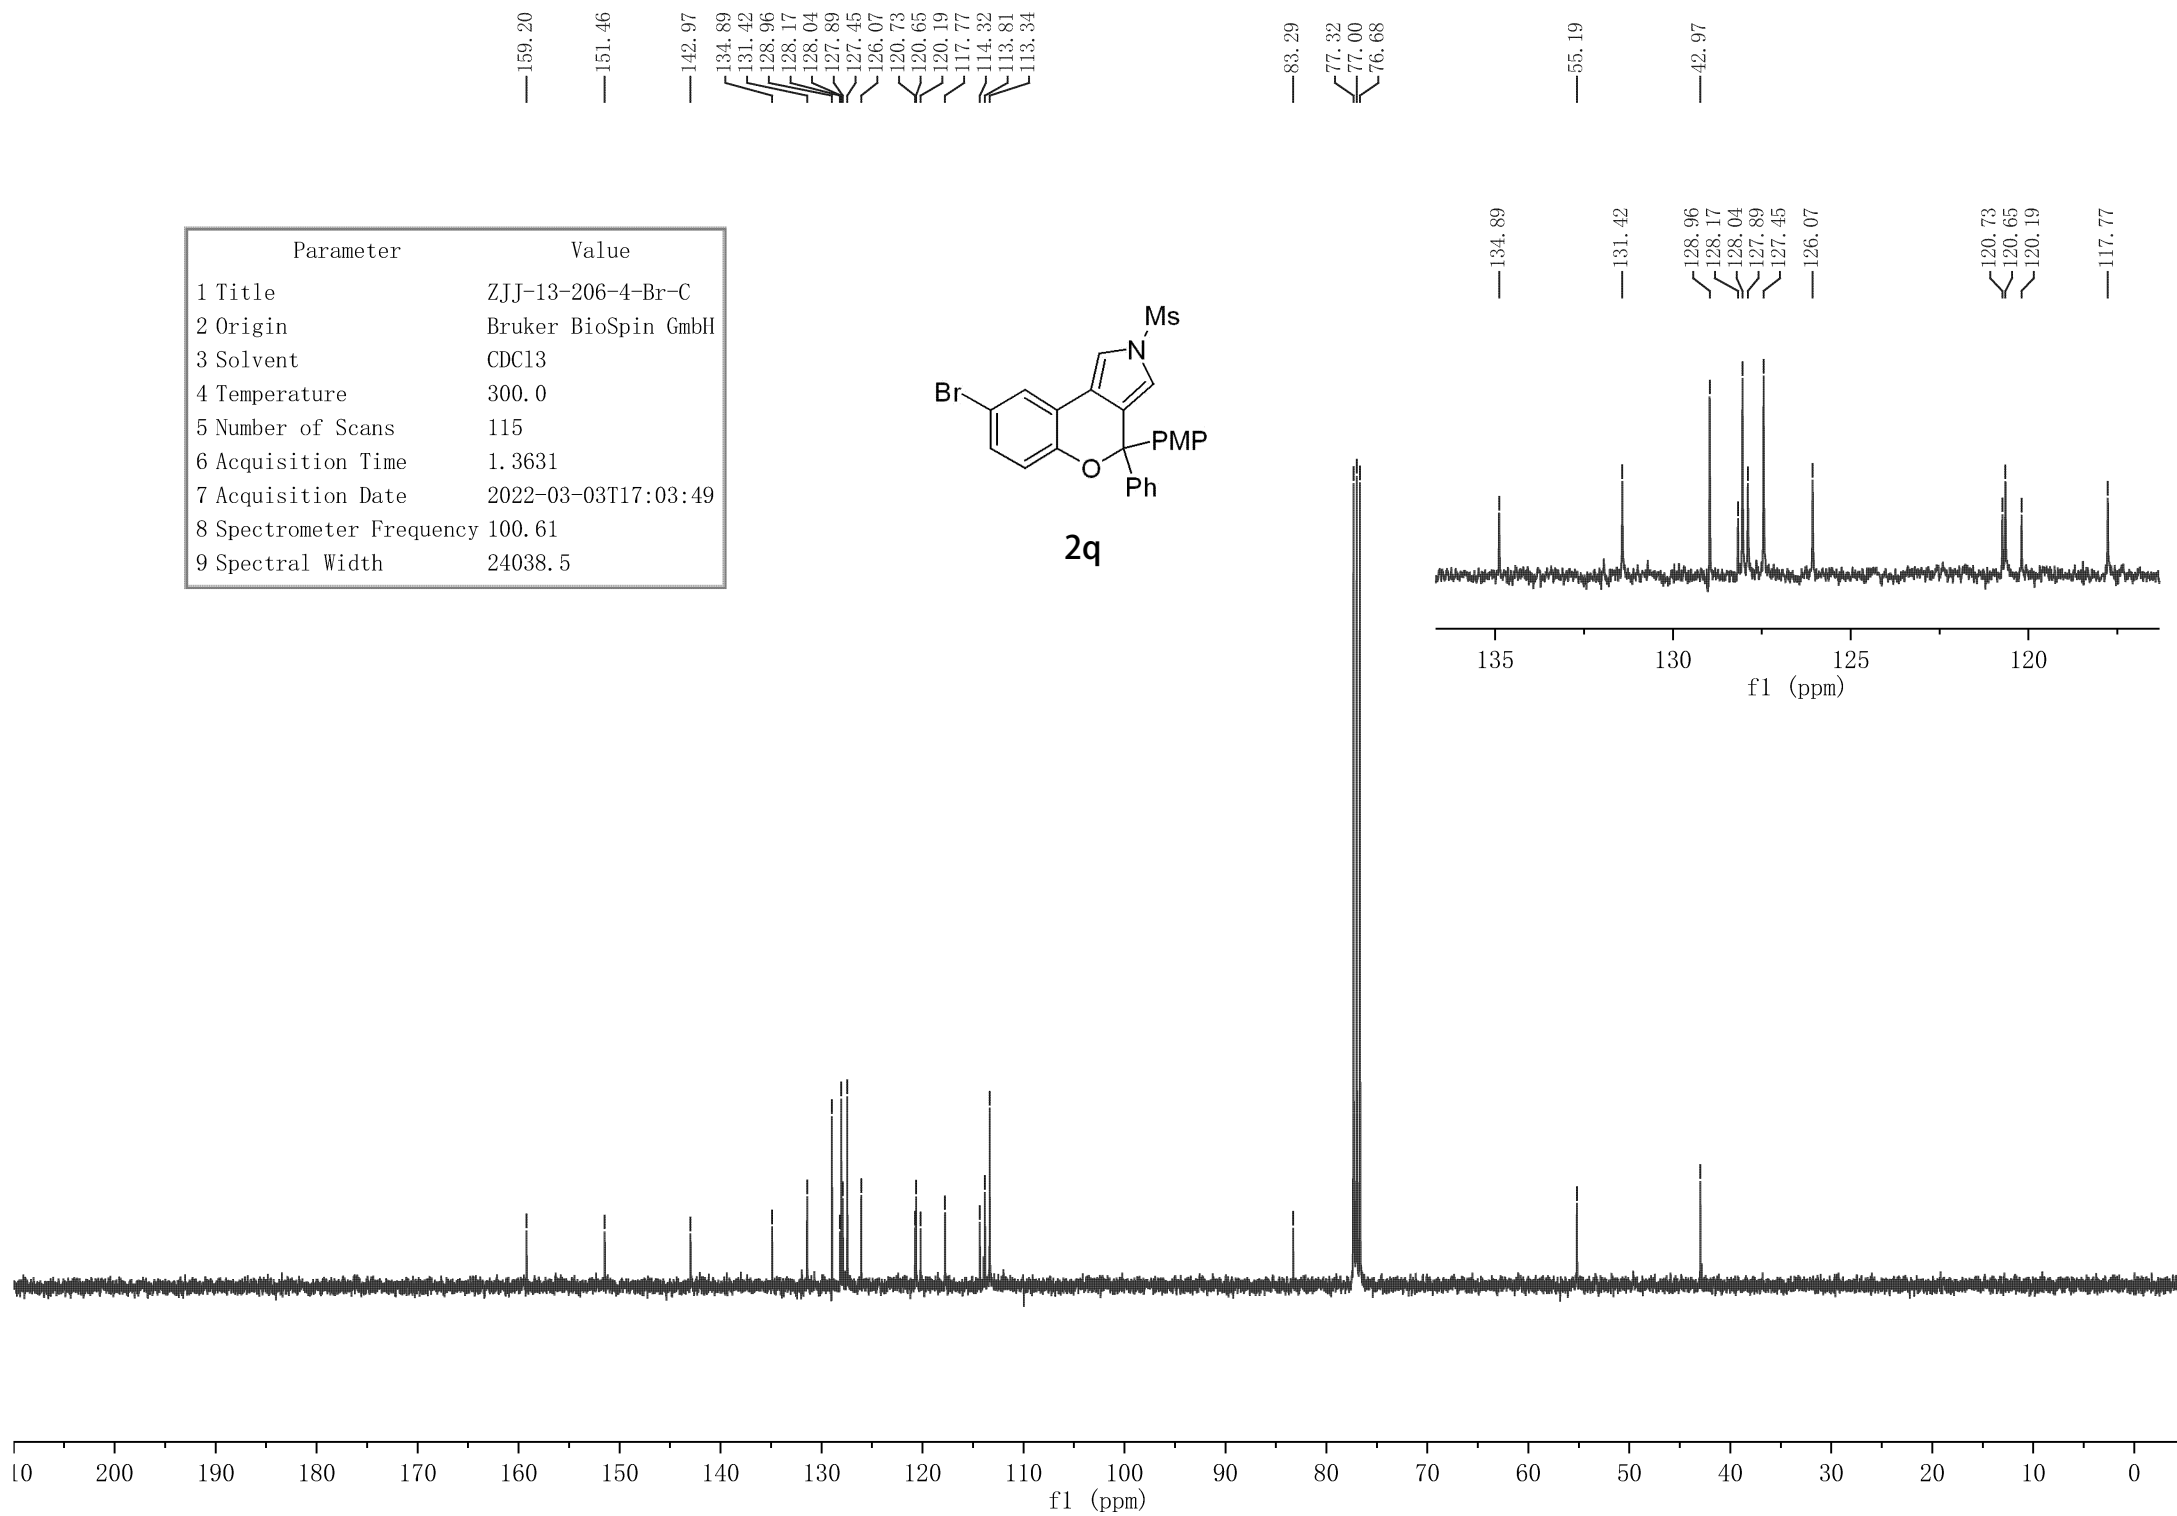

7.400  
7.396  
7.389  
7.383  
7.379  
7.376  
7.344  
7.327  
7.324  
7.305  
7.302  
7.287  
7.283  
7.277  
7.273  
7.267  
7.262  
7.256  
7.250  
7.243  
6.805  
6.787  
6.783  
6.767  
6.755  
6.750

| Parameter                | Value               |
|--------------------------|---------------------|
| 1 Title                  | zjj-14-4-6-Br-H     |
| 2 Origin                 | Bruker BioSpin GmbH |
| 3 Solvent                | CDCl3               |
| 4 Temperature            | 295.5               |
| 5 Number of Scans        | 13                  |
| 6 Acquisition Time       | 3.9846              |
| 7 Acquisition Date       | 2022-04-05T09:35:09 |
| 8 Spectrometer Frequency | 399.93              |
| 9 Spectral Width         | 8223.7              |

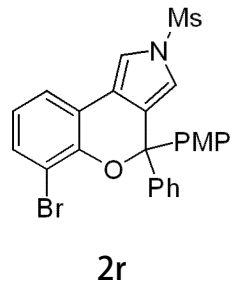

3.746  
3.146

7.400  
7.396  
7.389  
7.383  
7.379  
7.376  
7.344  
7.327  
7.324  
7.305  
7.302  
7.287  
7.283  
7.277  
7.273  
7.267  
7.262  
7.256  
7.250  
7.243

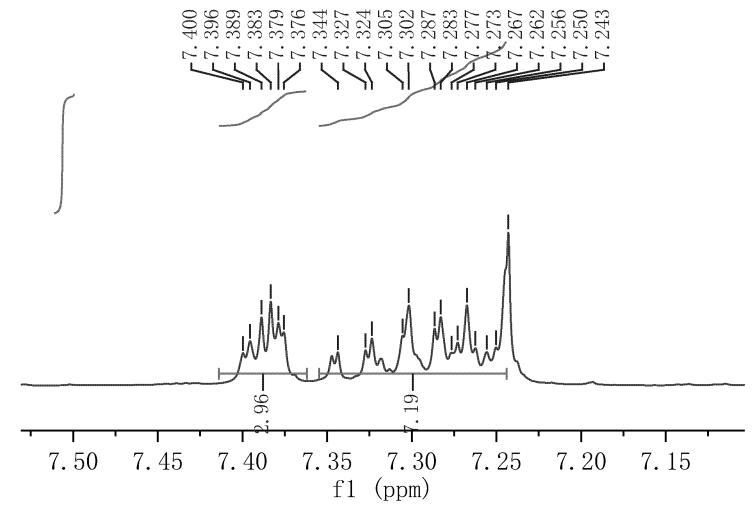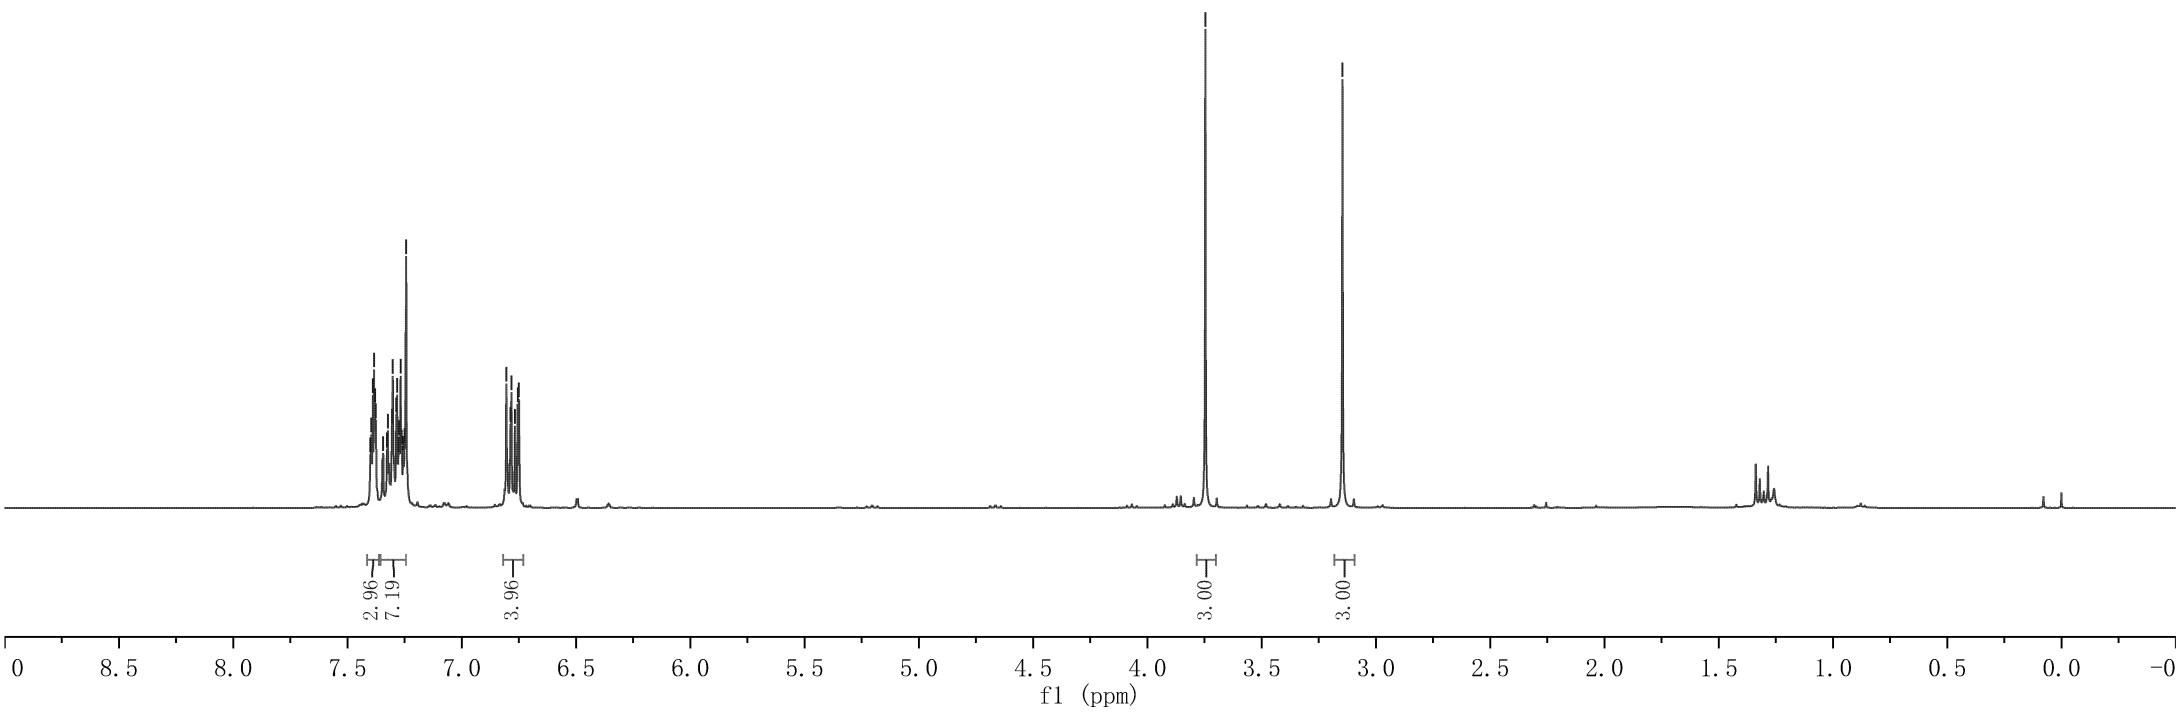

| Parameter                | Value               |
|--------------------------|---------------------|
| 1 Title                  | zjj-14-4-6-Br-C     |
| 2 Origin                 | Bruker BioSpin GmbH |
| 3 Solvent                | CDC13               |
| 4 Temperature            | 296.0               |
| 5 Number of Scans        | 57                  |
| 6 Acquisition Time       | 1.3631              |
| 7 Acquisition Date       | 2022-04-05T09:38:18 |
| 8 Spectrometer Frequency | 100.56              |
| 9 Spectral Width         | 24038.5             |

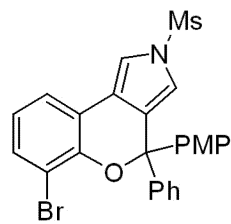

2r

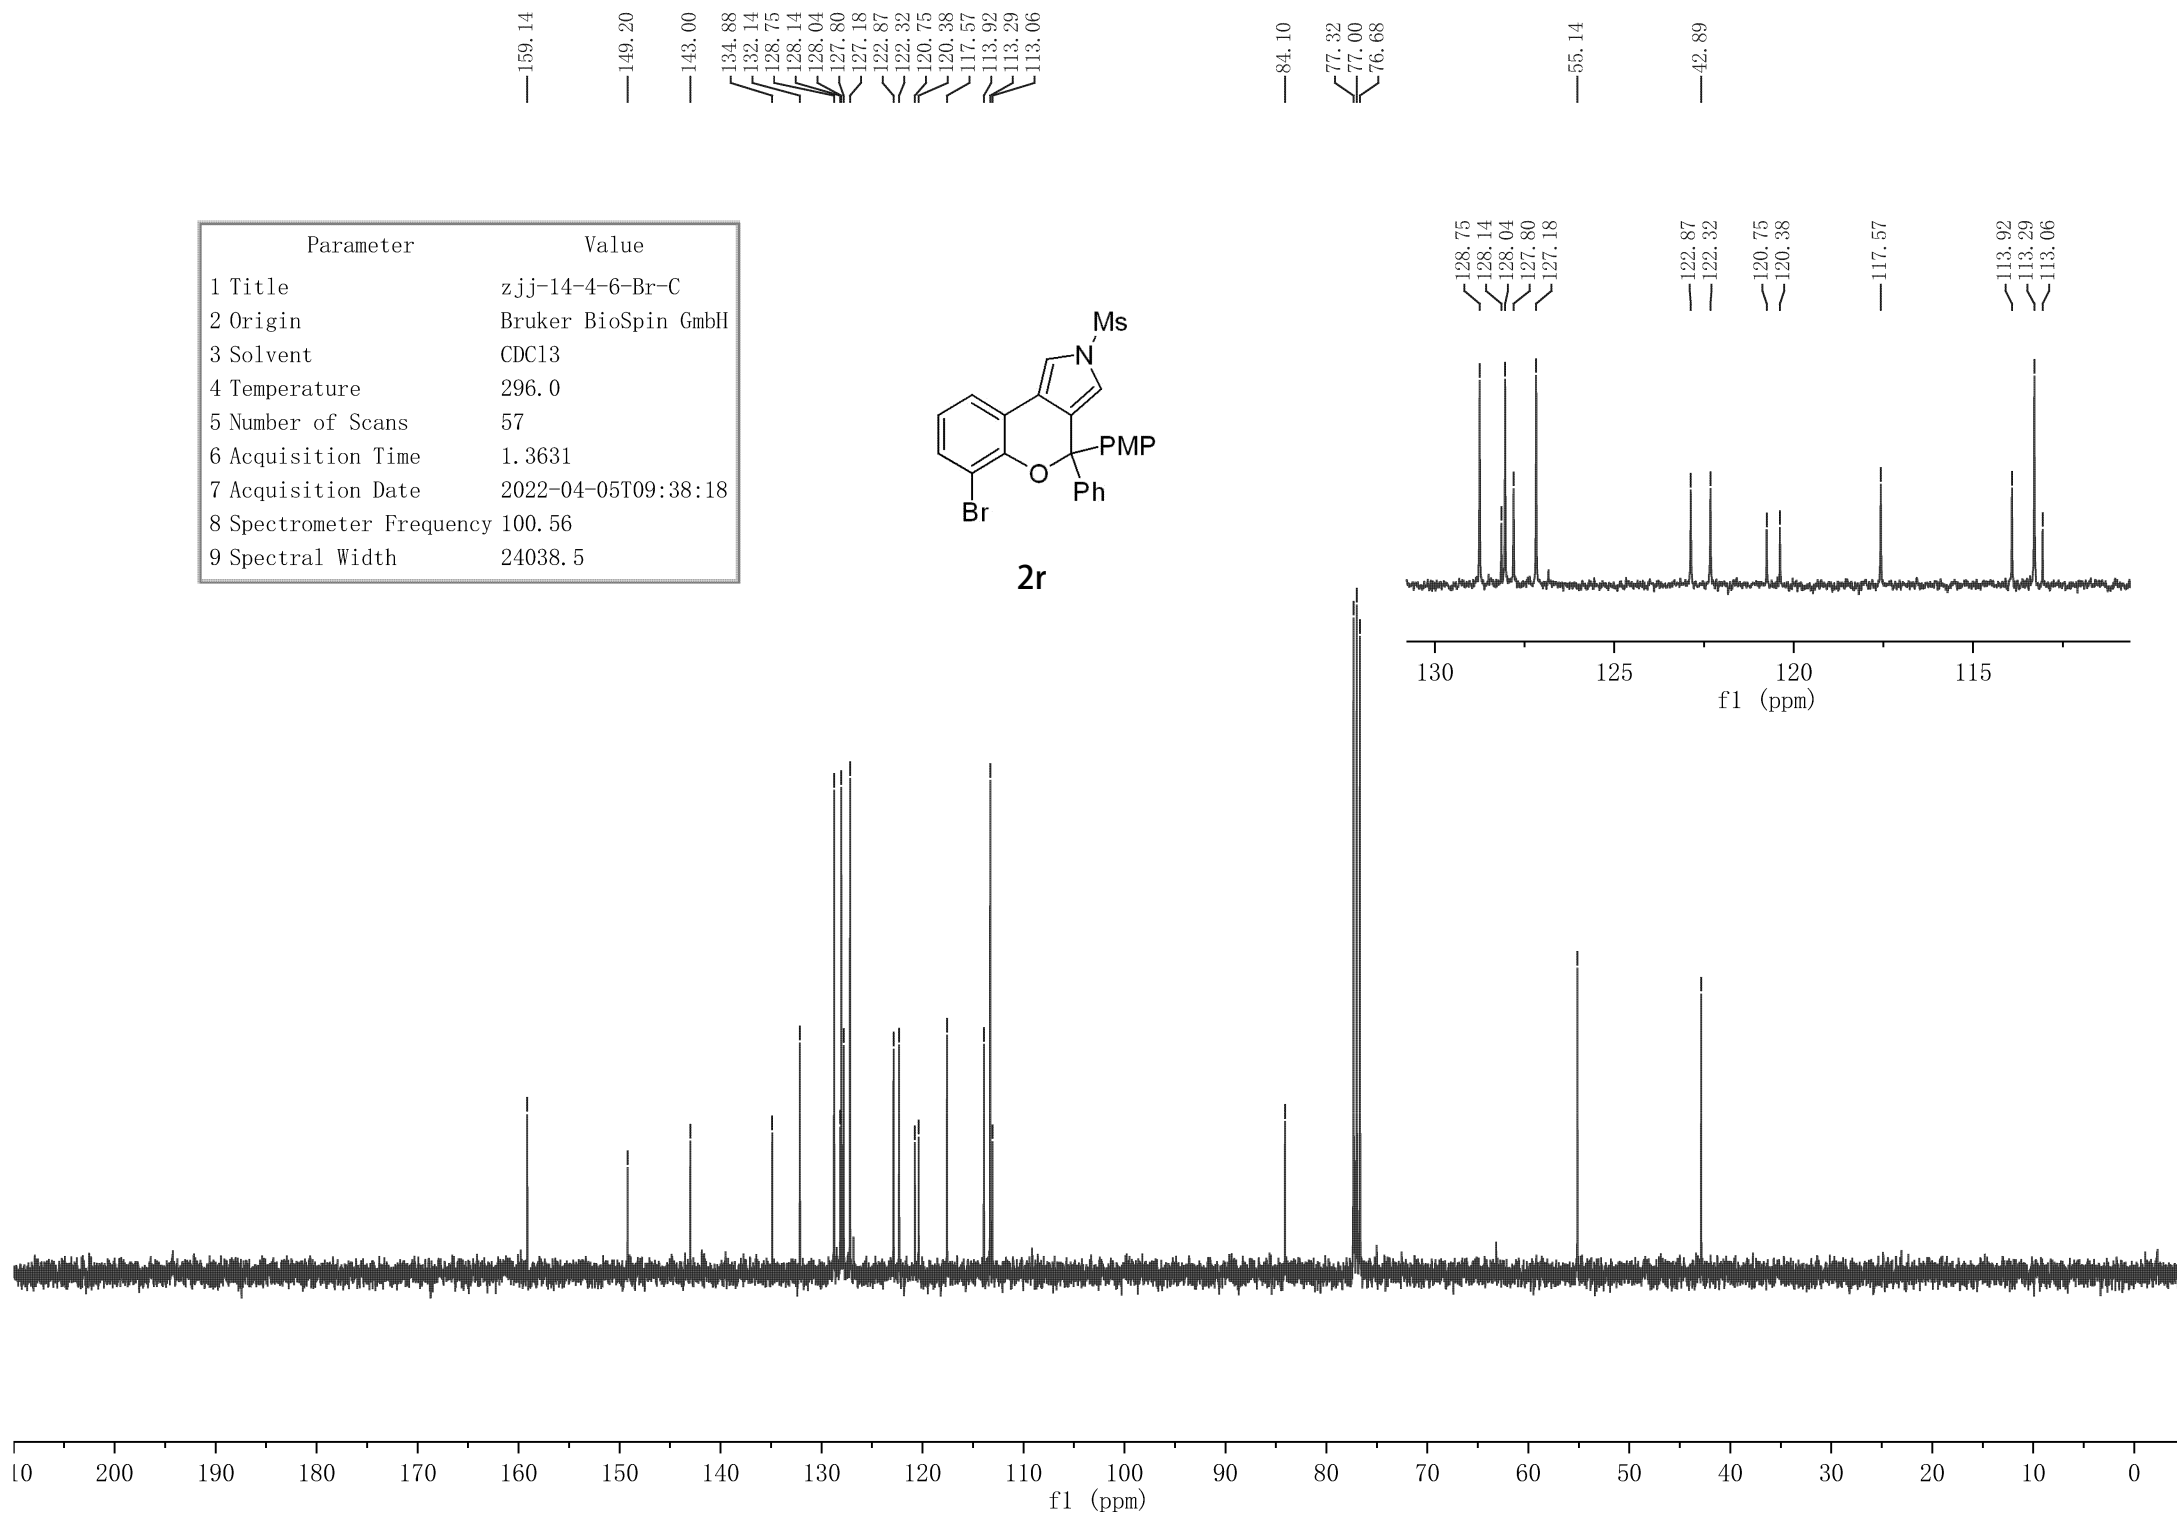

7.949  
7.944  
7.290  
7.248  
7.175  
7.154  
7.014  
7.008  
6.978  
6.962  
6.957  
6.952  
6.807  
6.785  
6.696  
6.691

| Parameter                | Value               |
|--------------------------|---------------------|
| 1 Title                  | LFS-2-125-H         |
| 2 Origin                 |                     |
| 3 Solvent                | CDC13               |
| 4 Temperature            | 297.5               |
| 5 Number of Scans        | 16                  |
| 6 Acquisition Time       | 4.0002              |
| 7 Acquisition Date       | 2022-04-04T14:14:31 |
| 8 Spectrometer Frequency | 399.93              |
| 9 Spectral Width         | 8012.0              |

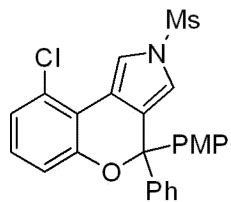

2s

3.760

3.187

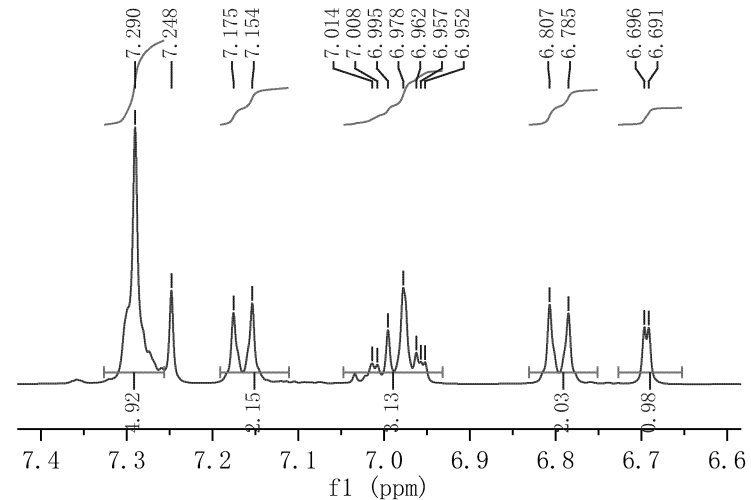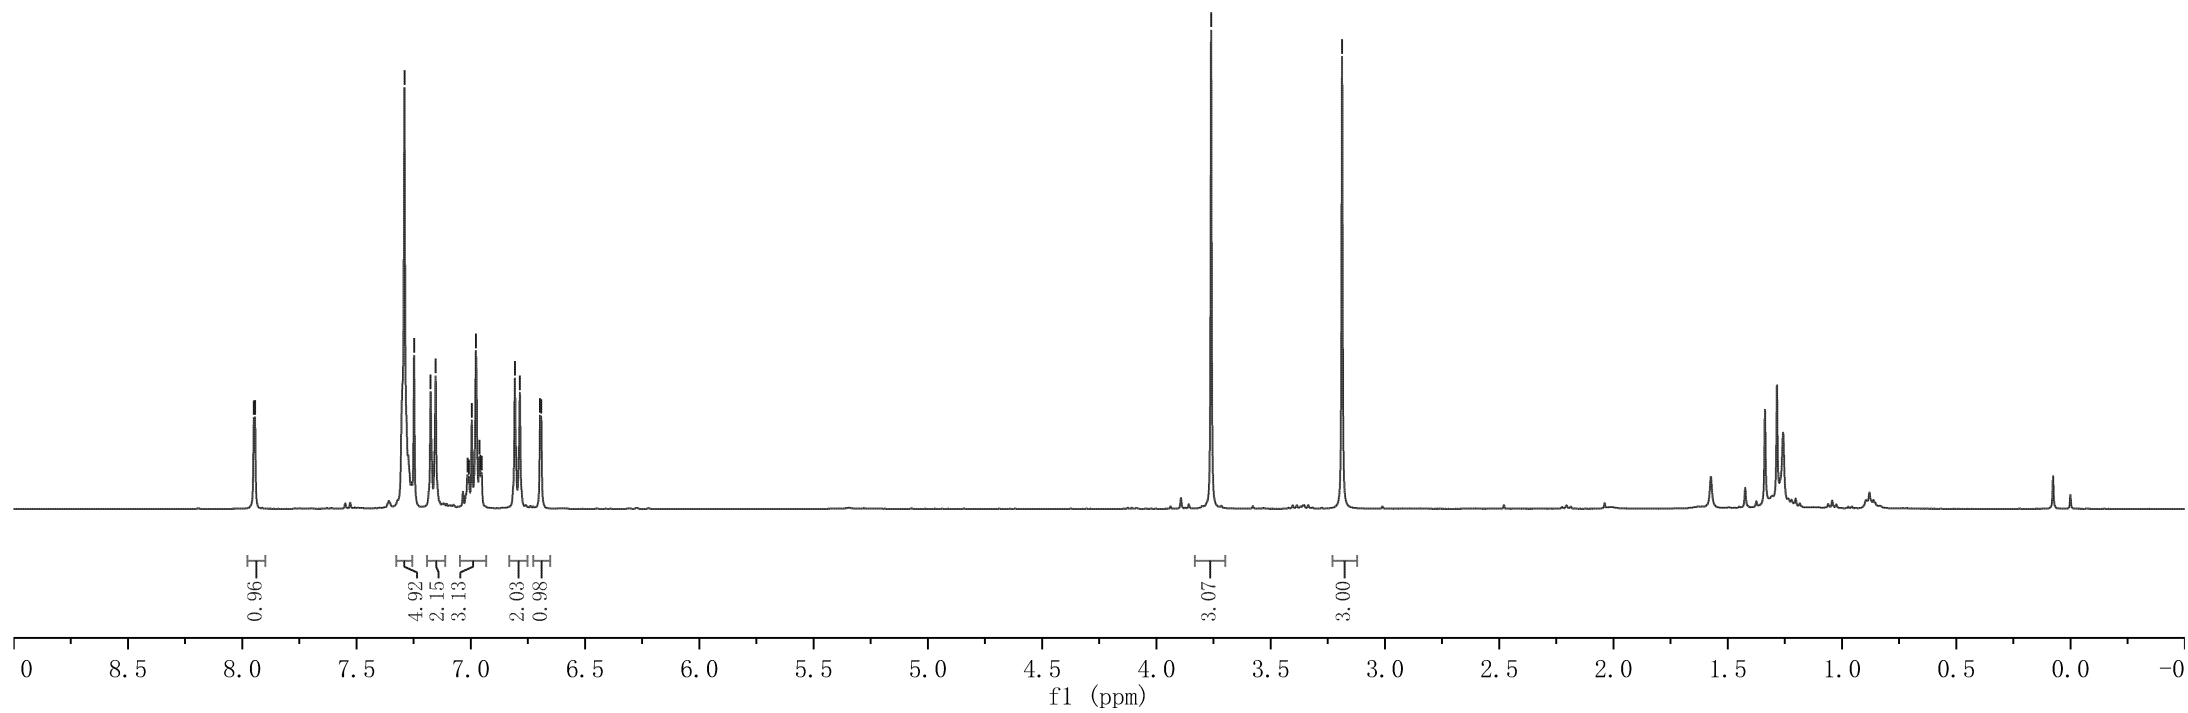

| Parameter                | Value               |
|--------------------------|---------------------|
| 1 Title                  | LFS-2-125-C         |
| 2 Origin                 |                     |
| 3 Solvent                | CDC13               |
| 4 Temperature            | 297.5               |
| 5 Number of Scans        | 300                 |
| 6 Acquisition Time       | 1.0000              |
| 7 Acquisition Date       | 2022-04-04T14:27:01 |
| 8 Spectrometer Frequency | 100.56              |
| 9 Spectral Width         | 26041.0             |

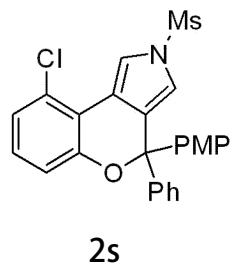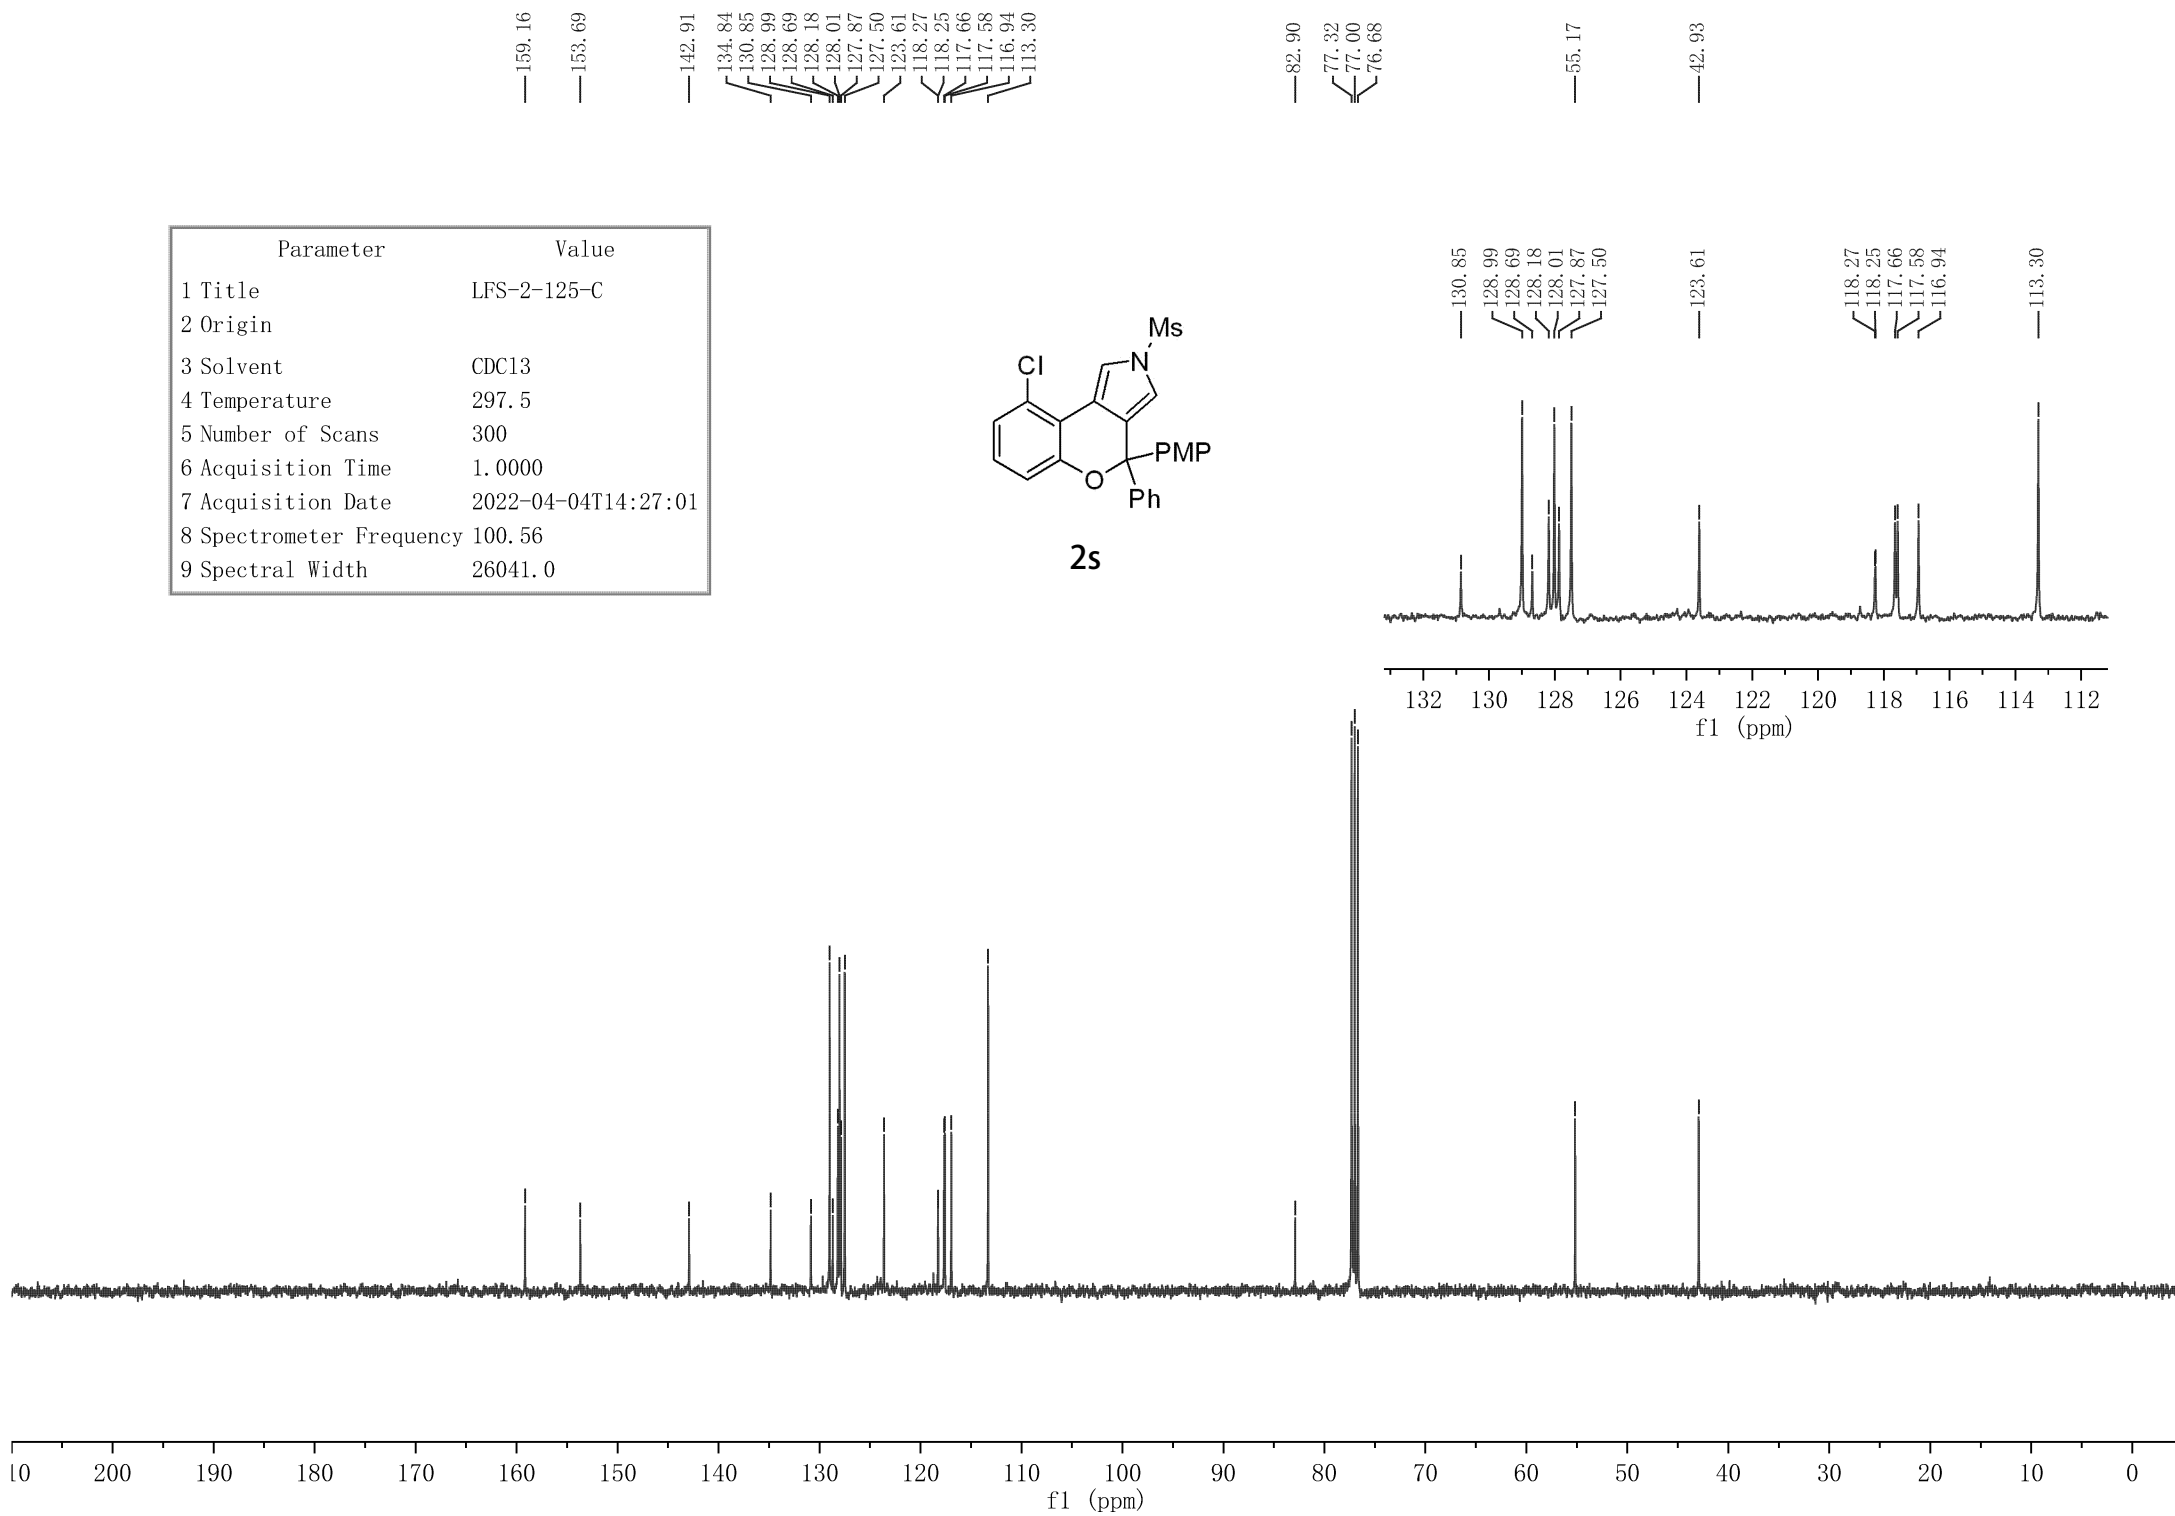



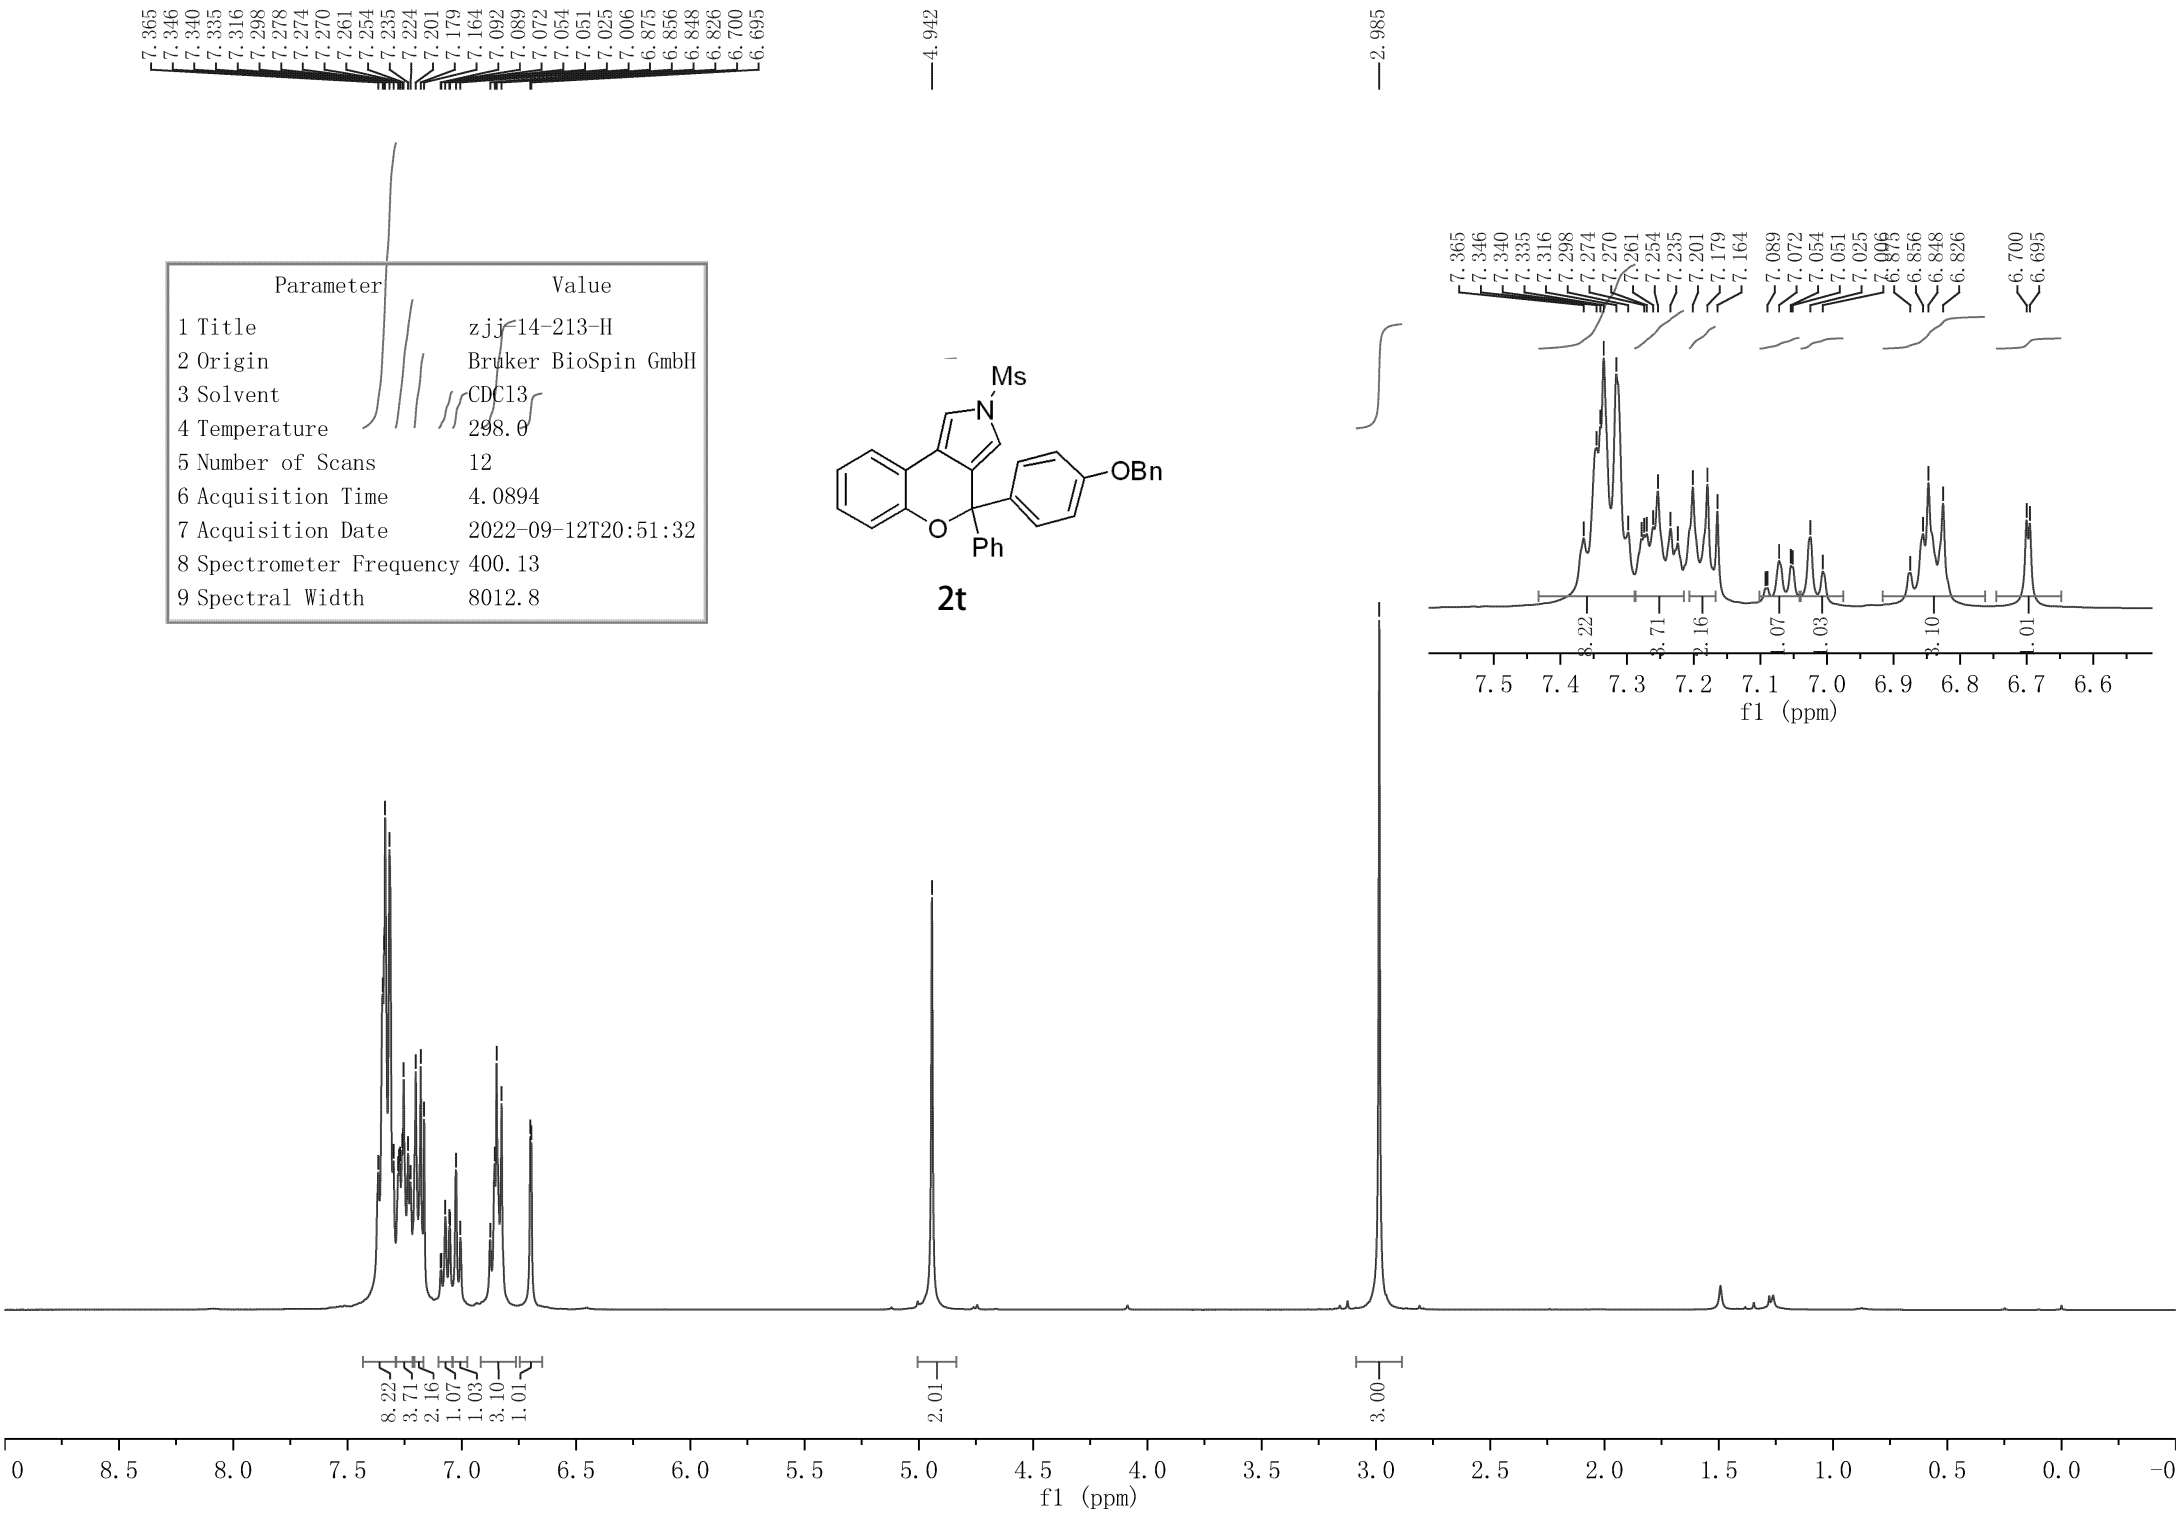

| Parameter                | Value               |
|--------------------------|---------------------|
| 1 Title                  | zjj-14-213-H        |
| 2 Origin                 | Bruker BioSpin GmbH |
| 3 Solvent                | CDCl3               |
| 4 Temperature            | 298.0               |
| 5 Number of Scans        | 12                  |
| 6 Acquisition Time       | 4.0894              |
| 7 Acquisition Date       | 2022-09-12T20:51:32 |
| 8 Spectrometer Frequency | 400.13              |
| 9 Spectral Width         | 8012.8              |

7.365  
7.346  
7.340  
7.335  
7.316  
7.298  
7.278  
7.274  
7.270  
7.261  
7.254  
7.253  
7.224  
7.201  
7.179  
7.164  
7.092  
7.089  
7.072  
7.054  
7.051  
7.025  
7.006  
6.875  
6.856  
6.848  
6.826  
6.700  
6.695

4.942

2.985

7.365  
7.346  
7.340  
7.335  
7.316  
7.298  
7.274  
7.270  
7.261  
7.254  
7.235  
7.201  
7.179  
7.164  
7.089  
7.072  
7.054  
7.051  
7.025  
6.996  
6.875  
6.856  
6.848  
6.826  
6.700  
6.695

8.22  
3.71  
2.16  
1.07  
1.03  
3.10  
1.01

2.01

3.00

f1 (ppm)

8.22  
3.71  
2.16  
1.07  
1.03  
3.10  
1.01

2.01

3.00

0 8.5 8.0 7.5 7.0 6.5 6.0 5.5 5.0 4.5 4.0 3.5 3.0 2.5 2.0 1.5 1.0 0.5 0.0 -0

f1 (ppm)

| Parameter                | Value               |
|--------------------------|---------------------|
| 1 Title                  | zjj-14-213-C        |
| 2 Origin                 | Bruker BioSpin GmbH |
| 3 Solvent                | CDC13               |
| 4 Temperature            | 300.0               |
| 5 Number of Scans        | 18                  |
| 6 Acquisition Time       | 1.3631              |
| 7 Acquisition Date       | 2022-09-12T20:54:49 |
| 8 Spectrometer Frequency | 100.61              |
| 9 Spectral Width         | 24038.5             |

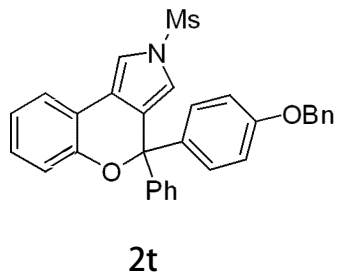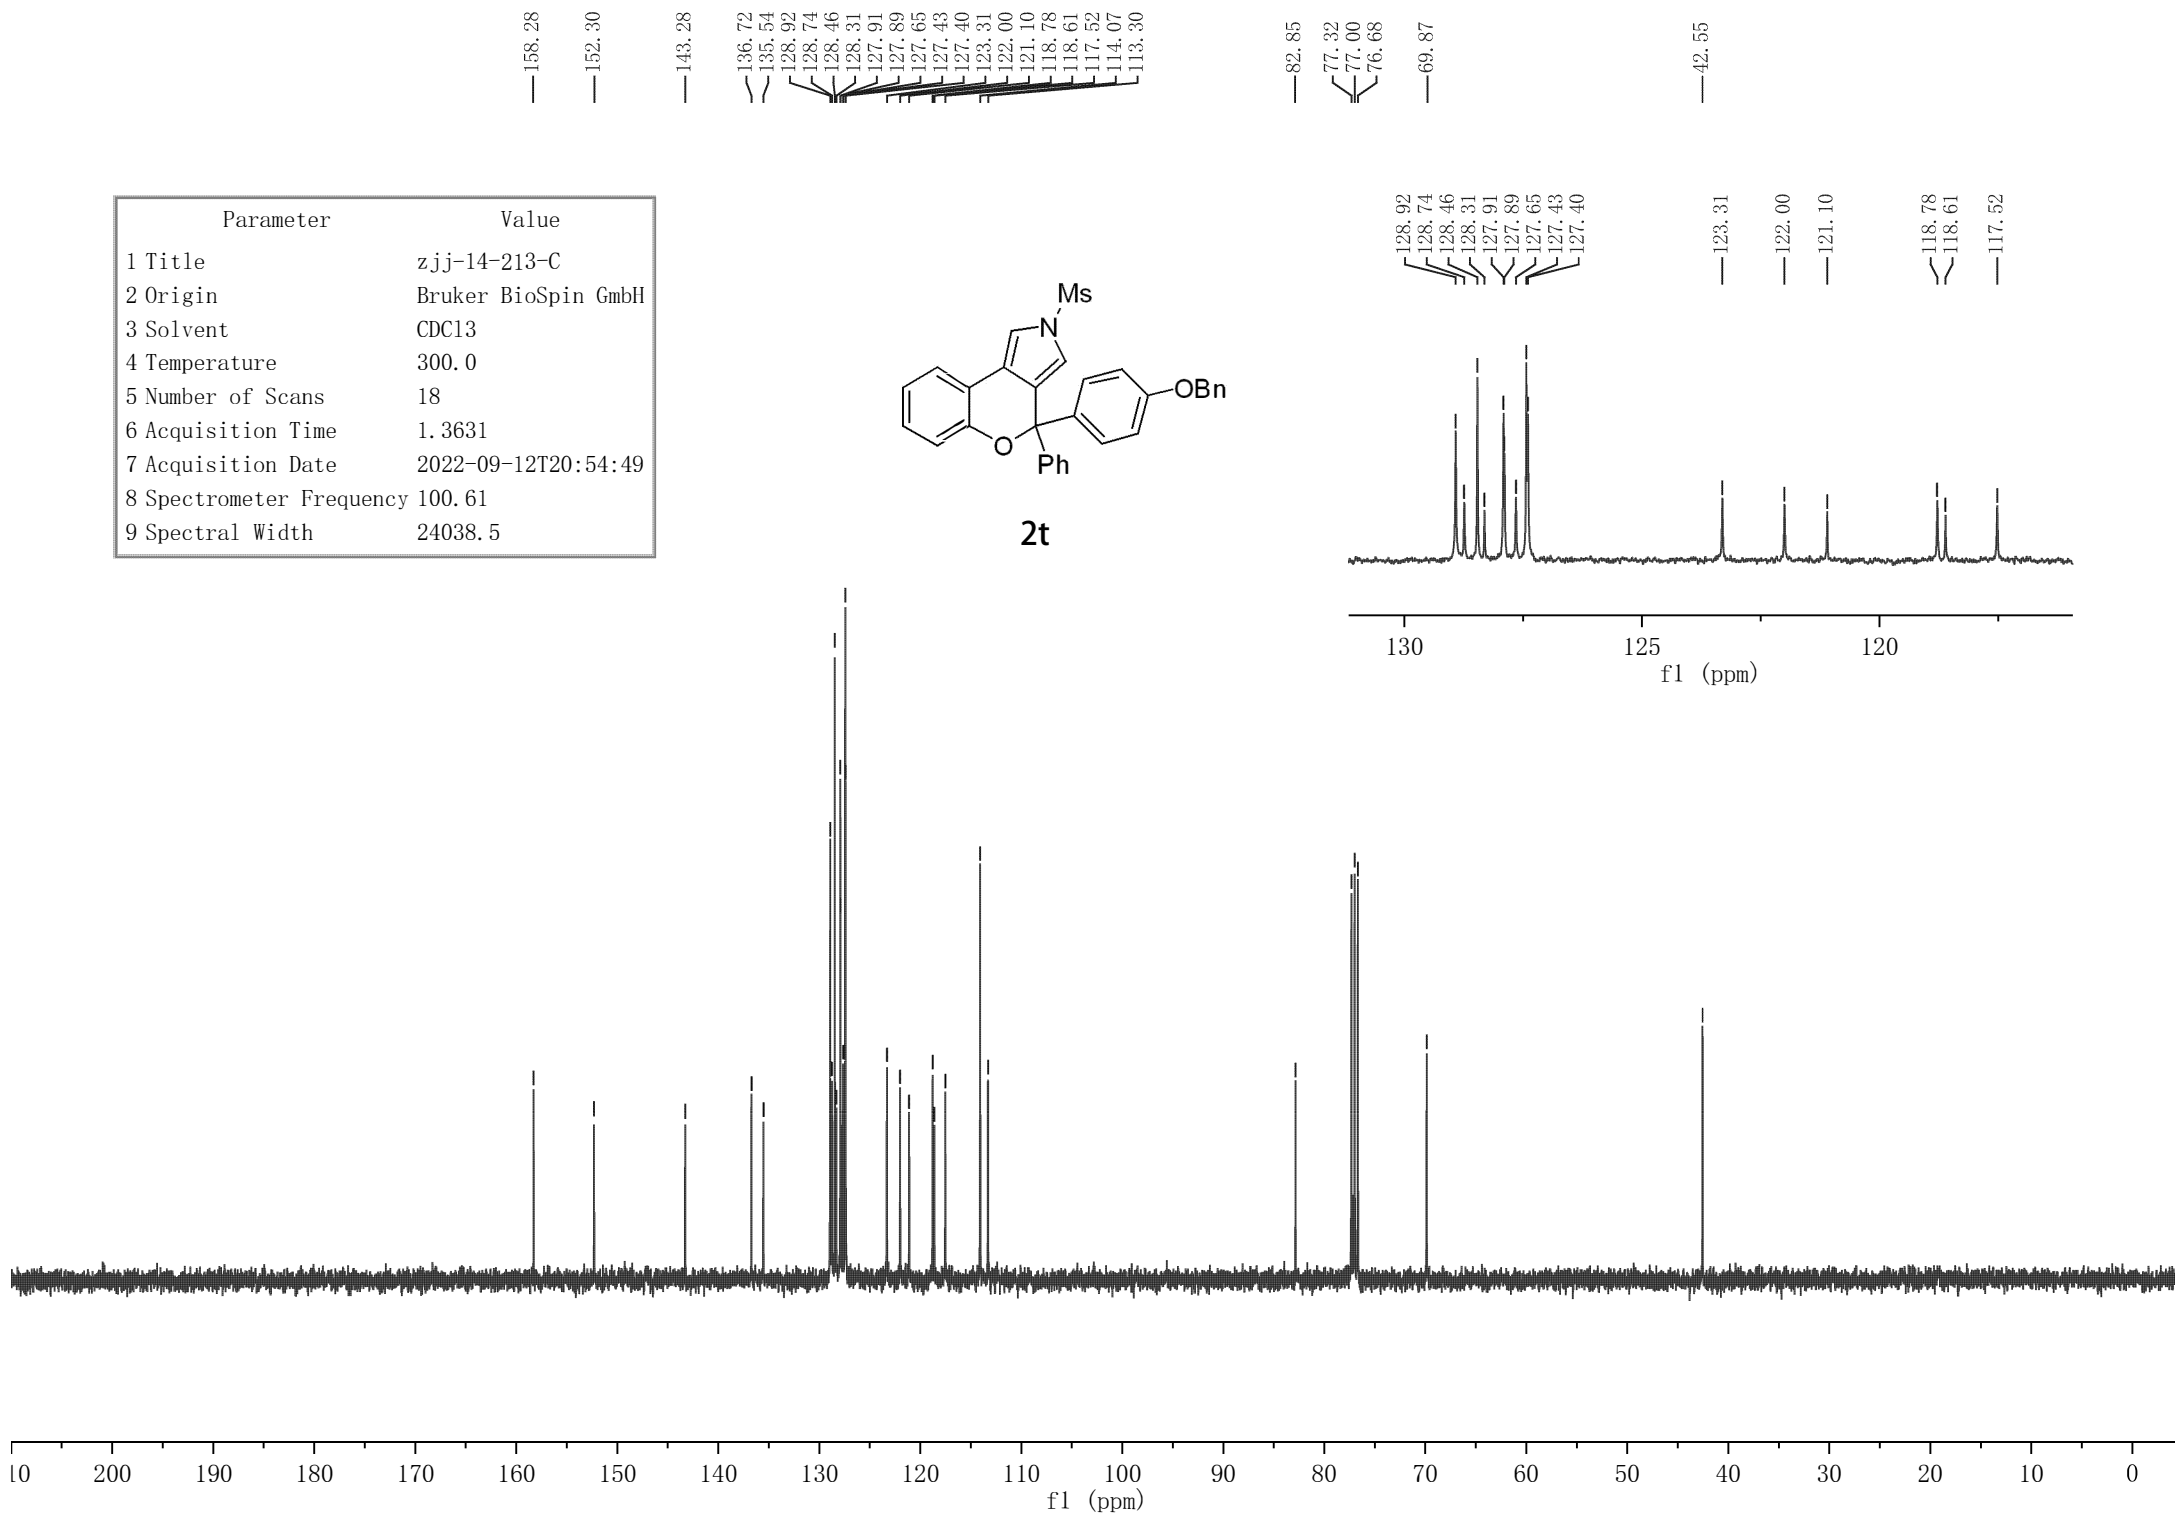

7.379  
7.374  
7.365  
7.361  
7.325  
7.322  
7.316  
7.313  
7.294  
7.273  
7.266  
7.246  
7.240  
7.224  
7.146  
7.142  
7.126  
7.122  
7.113  
7.111  
7.108  
7.104  
7.095  
7.077  
7.051  
7.049  
7.031  
7.029  
7.015  
7.012  
6.993  
6.937  
6.934  
6.919  
6.916  
6.894  
6.872  
6.724  
6.718

| Parameter                | Value               |
|--------------------------|---------------------|
| 1 Title                  | zjj-14-25-H         |
| 2 Origin                 | Bruker BioSpin GmbH |
| 3 Solvent                | CDC13               |
| 4 Temperature            | 298.0               |
| 5 Number of Scans        | 7                   |
| 6 Acquisition Time       | 4.0894              |
| 7 Acquisition Date       | 2022-04-12T19:39:18 |
| 8 Spectrometer Frequency | 400.13              |
| 9 Spectral Width         | 8012.8              |

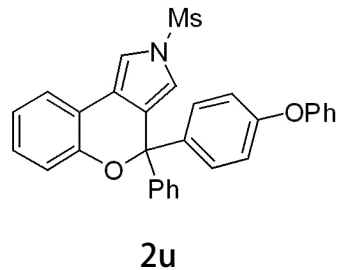

3.149

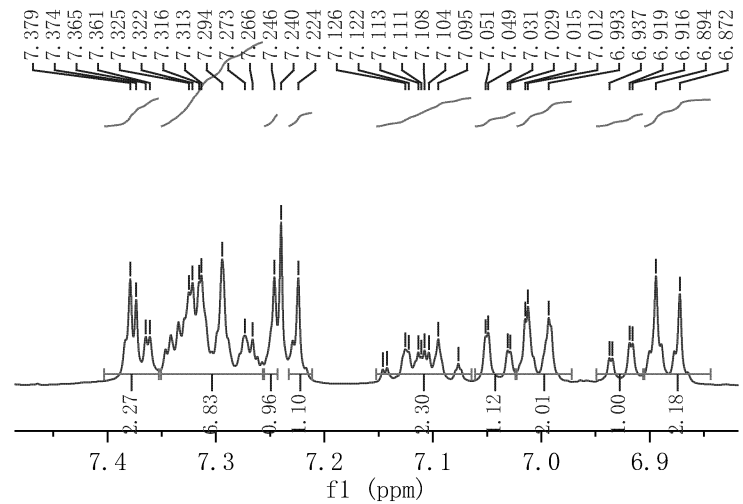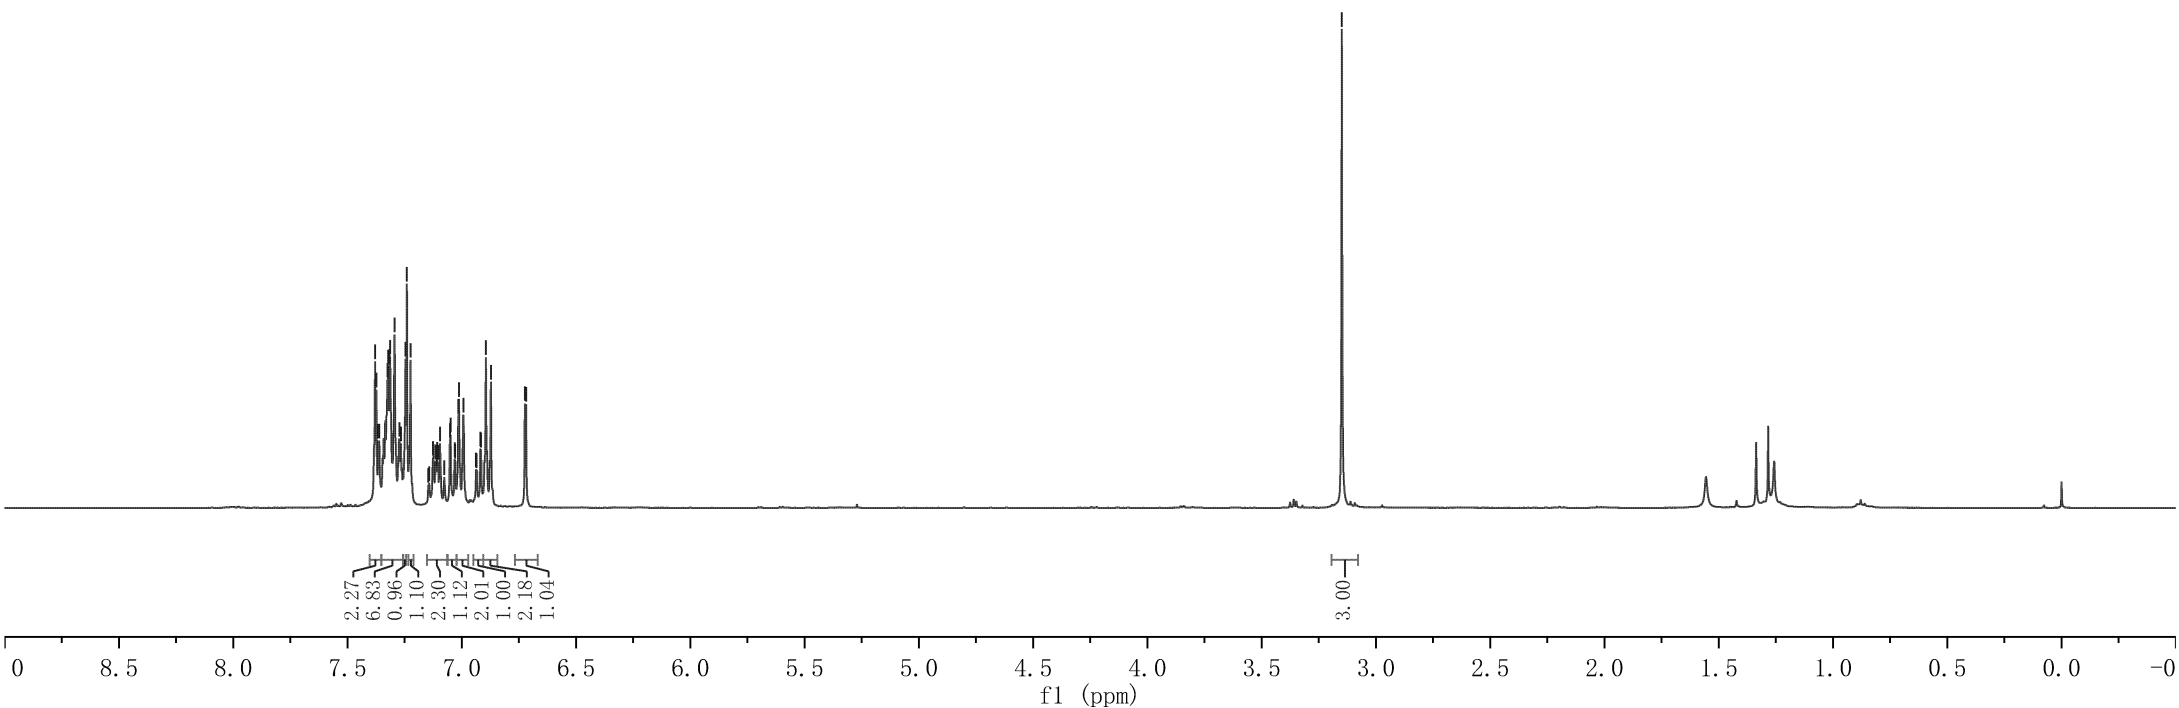

| Parameter                | Value               |
|--------------------------|---------------------|
| 1 Title                  | zjj-14-25-C         |
| 2 Origin                 | Bruker BioSpin GmbH |
| 3 Solvent                | CDC13               |
| 4 Temperature            | 300.0               |
| 5 Number of Scans        | 74                  |
| 6 Acquisition Time       | 1.3631              |
| 7 Acquisition Date       | 2022-04-12T19:41:14 |
| 8 Spectrometer Frequency | 100.61              |
| 9 Spectral Width         | 24038.5             |

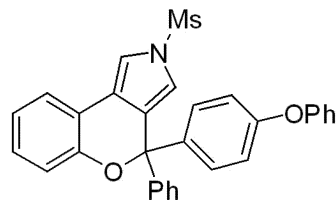

2u

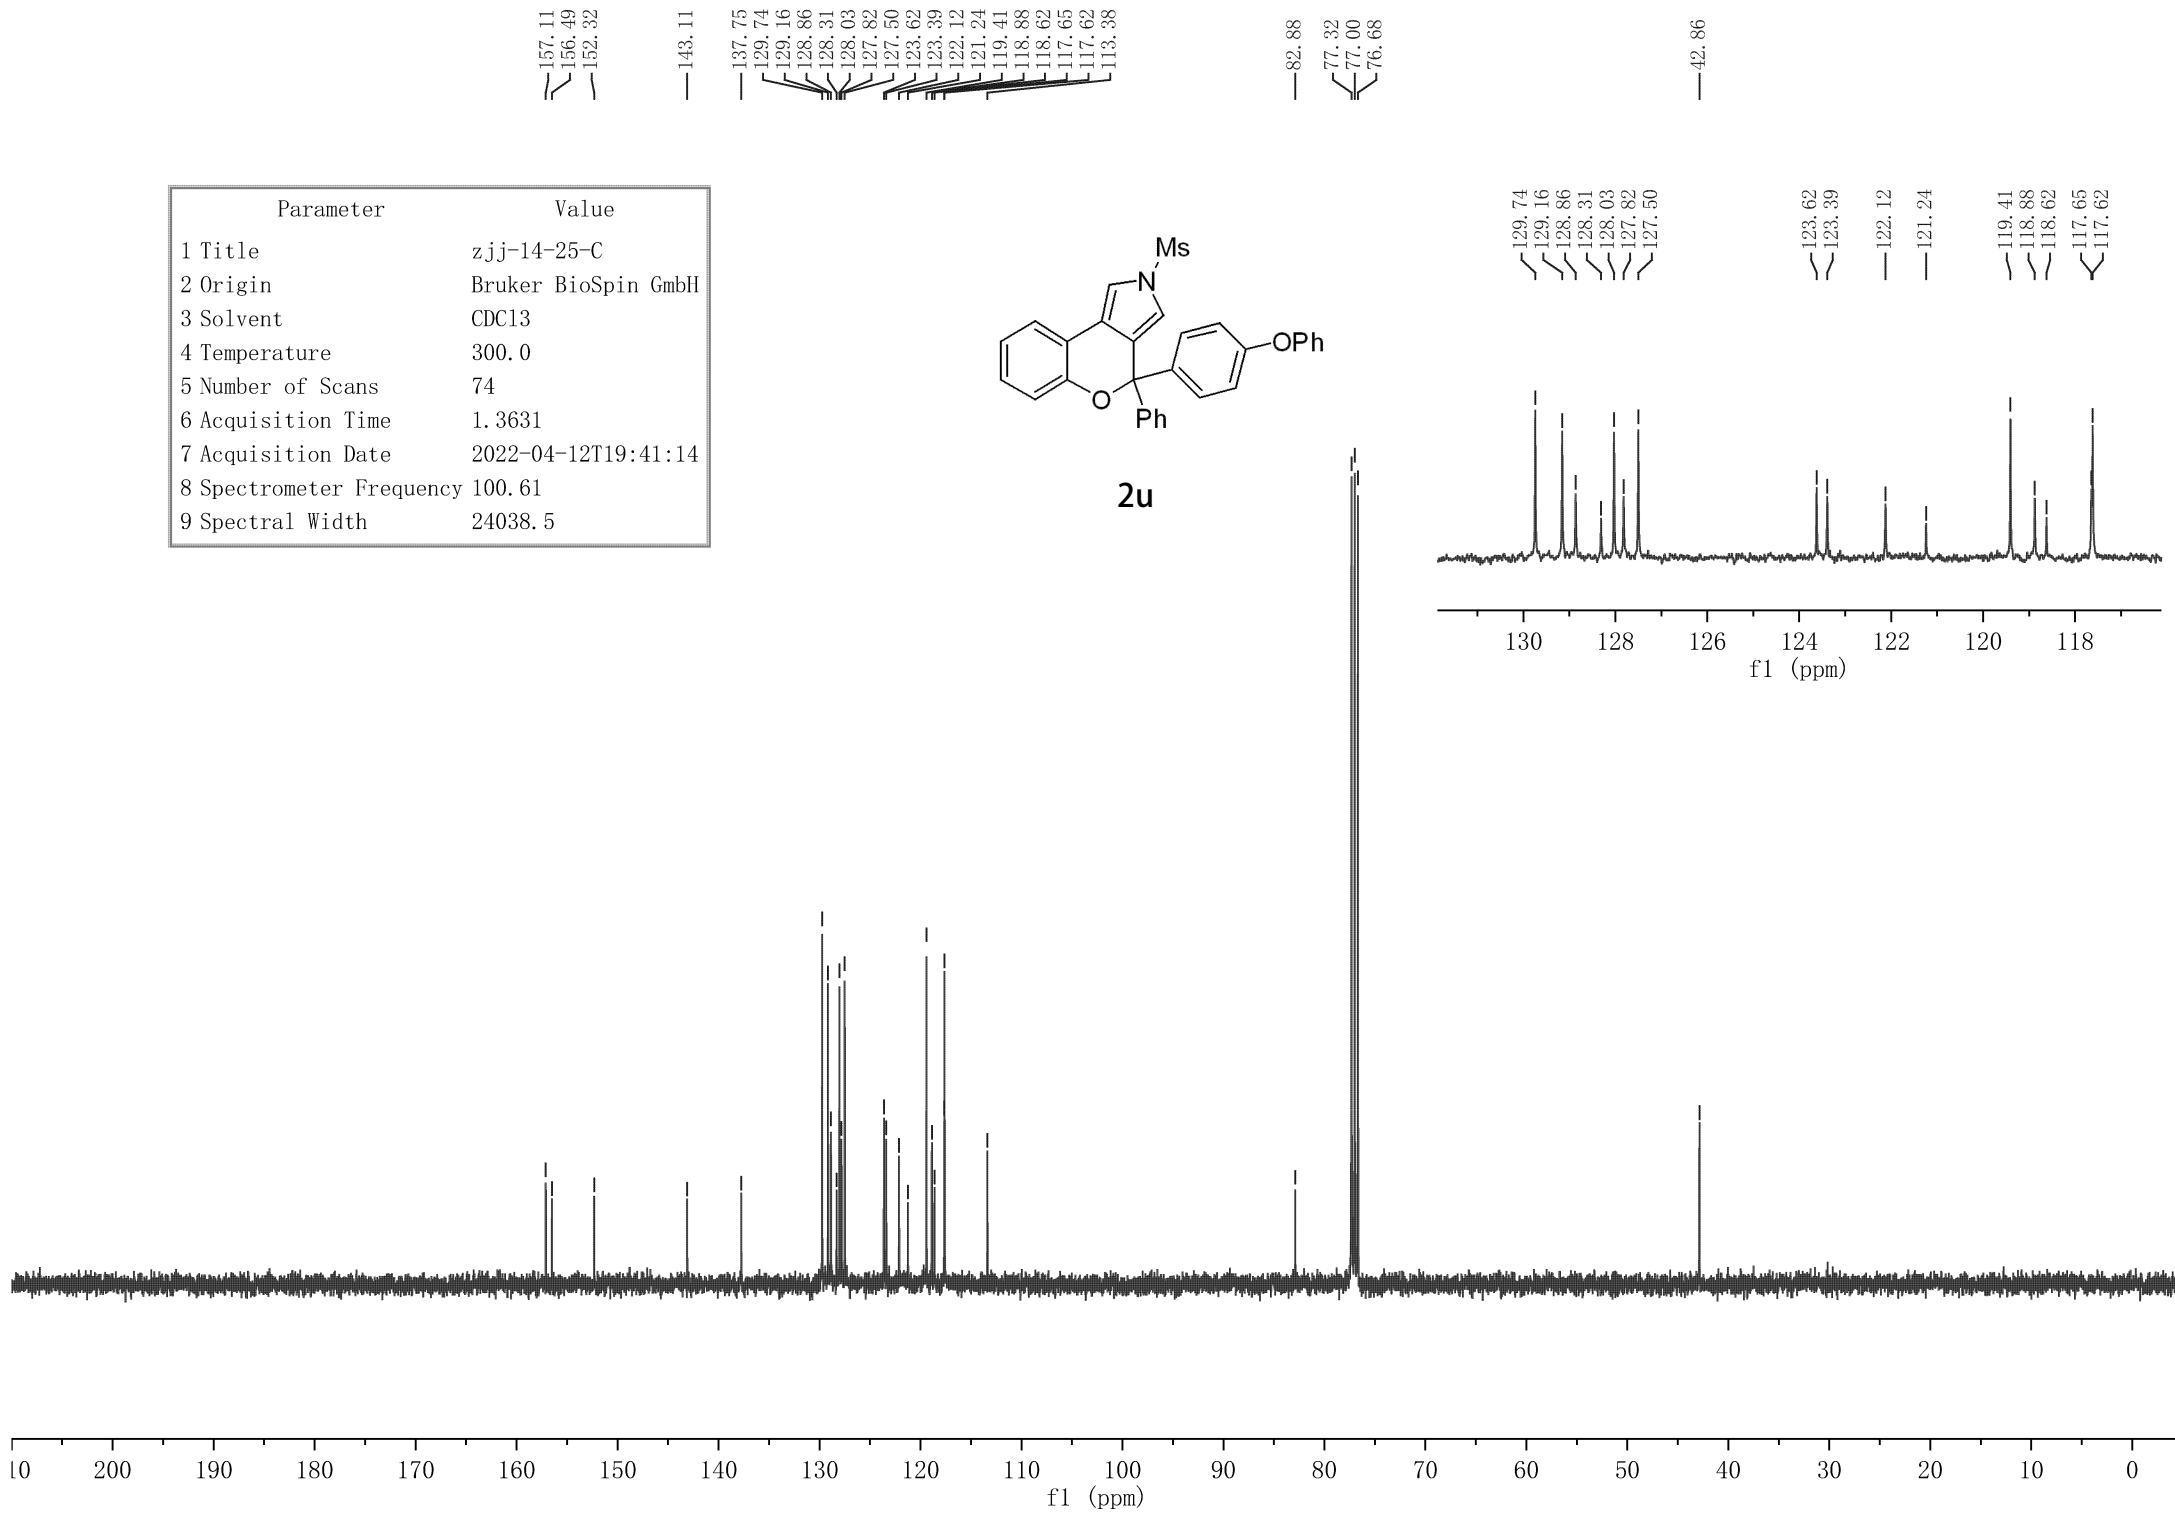

7.369  
7.364  
7.352  
7.348  
7.323  
7.307  
7.303  
7.297  
7.293  
7.277  
7.258  
7.253  
7.243  
7.187  
7.167  
7.132  
7.128  
7.112  
7.086  
7.065  
7.048  
7.045  
7.027  
7.025  
6.918  
6.915  
6.900  
6.897  
6.881  
6.878  
6.712  
6.707

| Parameter                | Value               |
|--------------------------|---------------------|
| 1 Title                  | zjj-14-24-H         |
| 2 Origin                 | Bruker BioSpin GmbH |
| 3 Solvent                | CDC13               |
| 4 Temperature            | 298.0               |
| 5 Number of Scans        | 6                   |
| 6 Acquisition Time       | 4.0894              |
| 7 Acquisition Date       | 2022-04-12T19:29:46 |
| 8 Spectrometer Frequency | 400.13              |
| 9 Spectral Width         | 8012.8              |

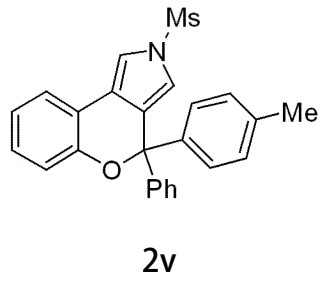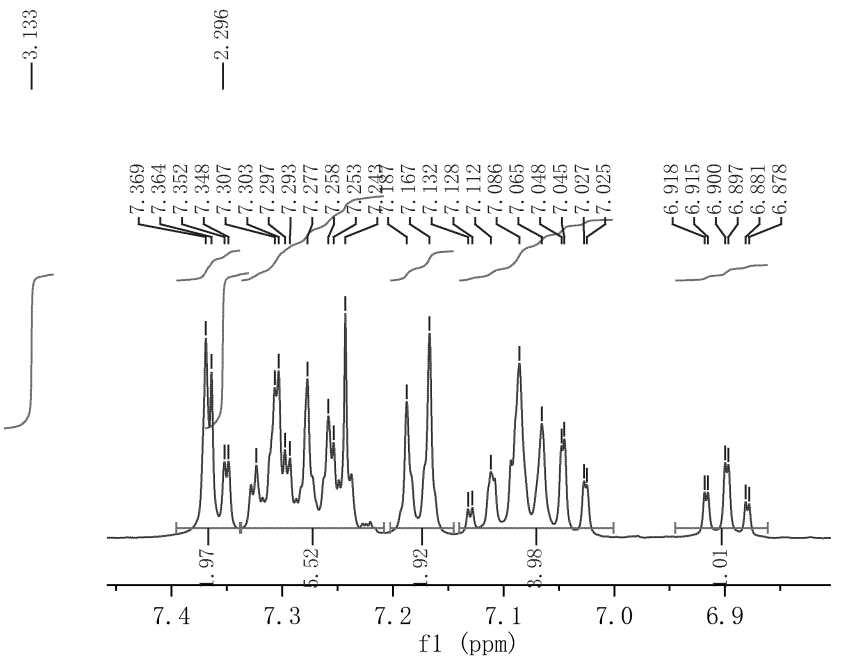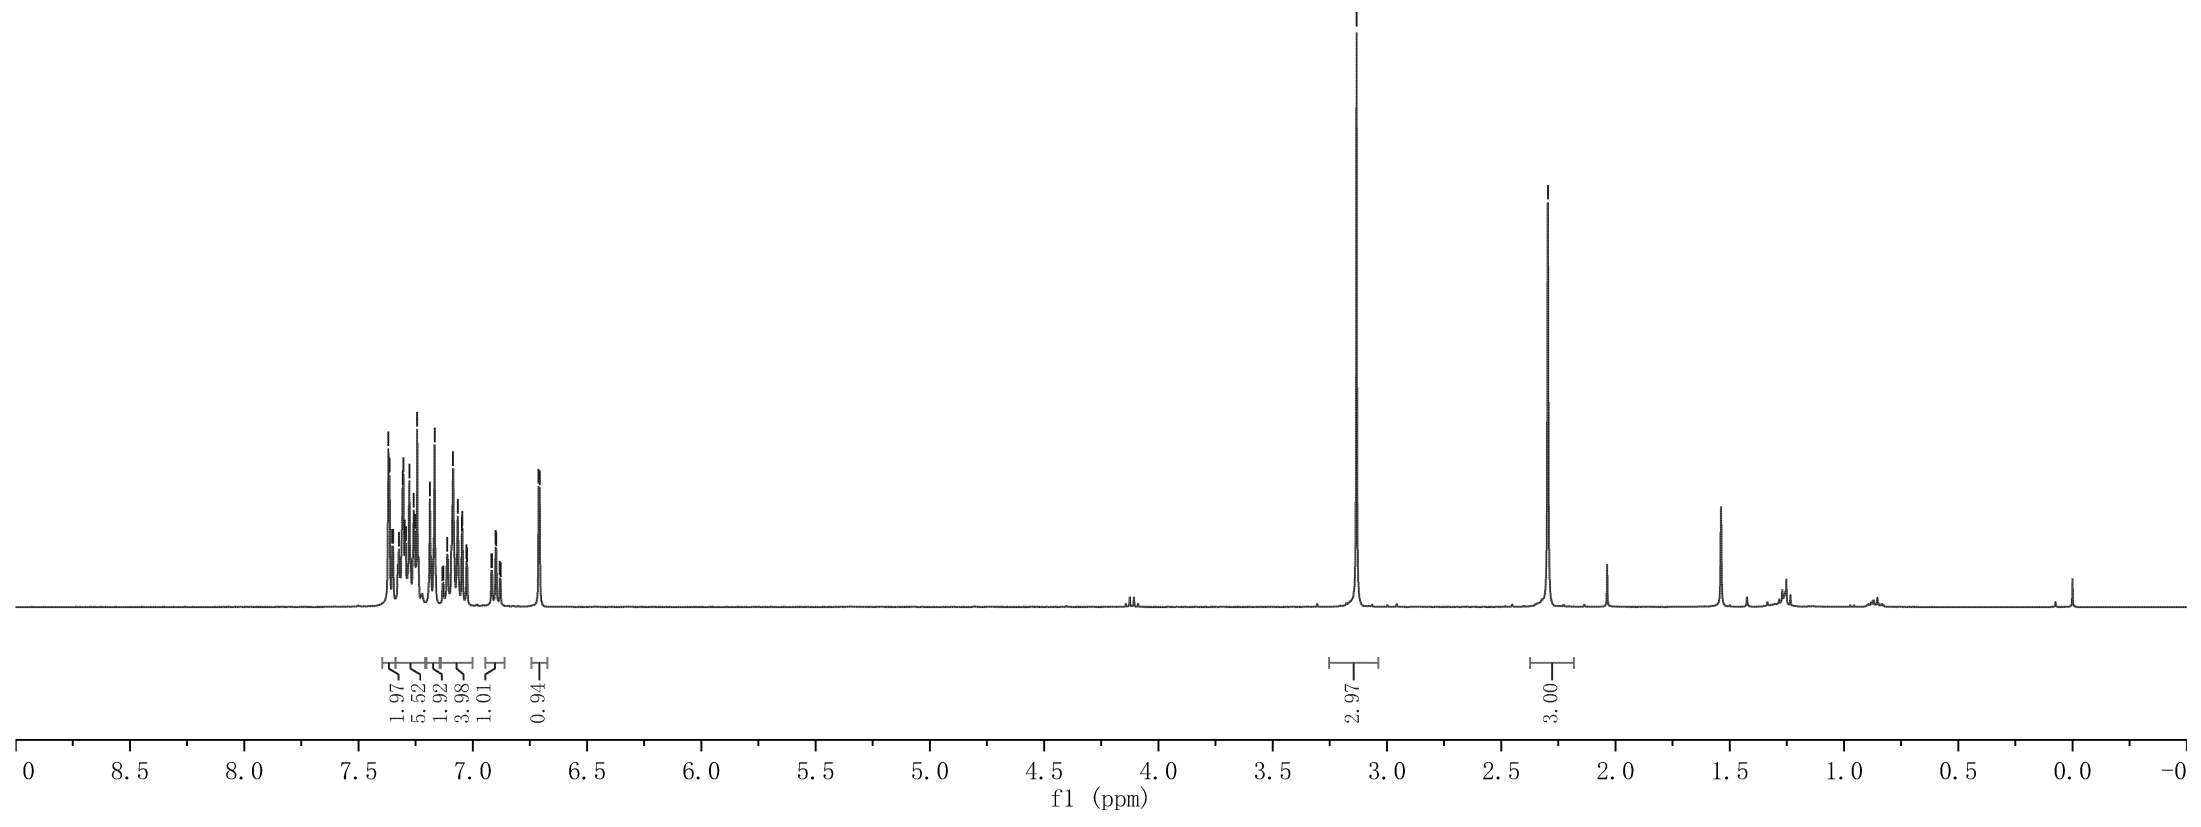

| Parameter                | Value               |
|--------------------------|---------------------|
| 1 Title                  | zjj-14-24-C         |
| 2 Origin                 | Bruker BioSpin GmbH |
| 3 Solvent                | CDC13               |
| 4 Temperature            | 300.0               |
| 5 Number of Scans        | 77                  |
| 6 Acquisition Time       | 1.3631              |
| 7 Acquisition Date       | 2022-04-12T19:32:10 |
| 8 Spectrometer Frequency | 100.61              |
| 9 Spectral Width         | 24038.5             |

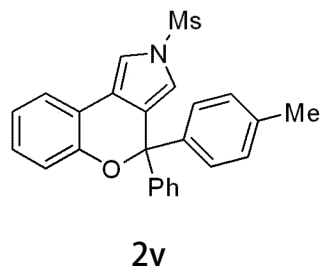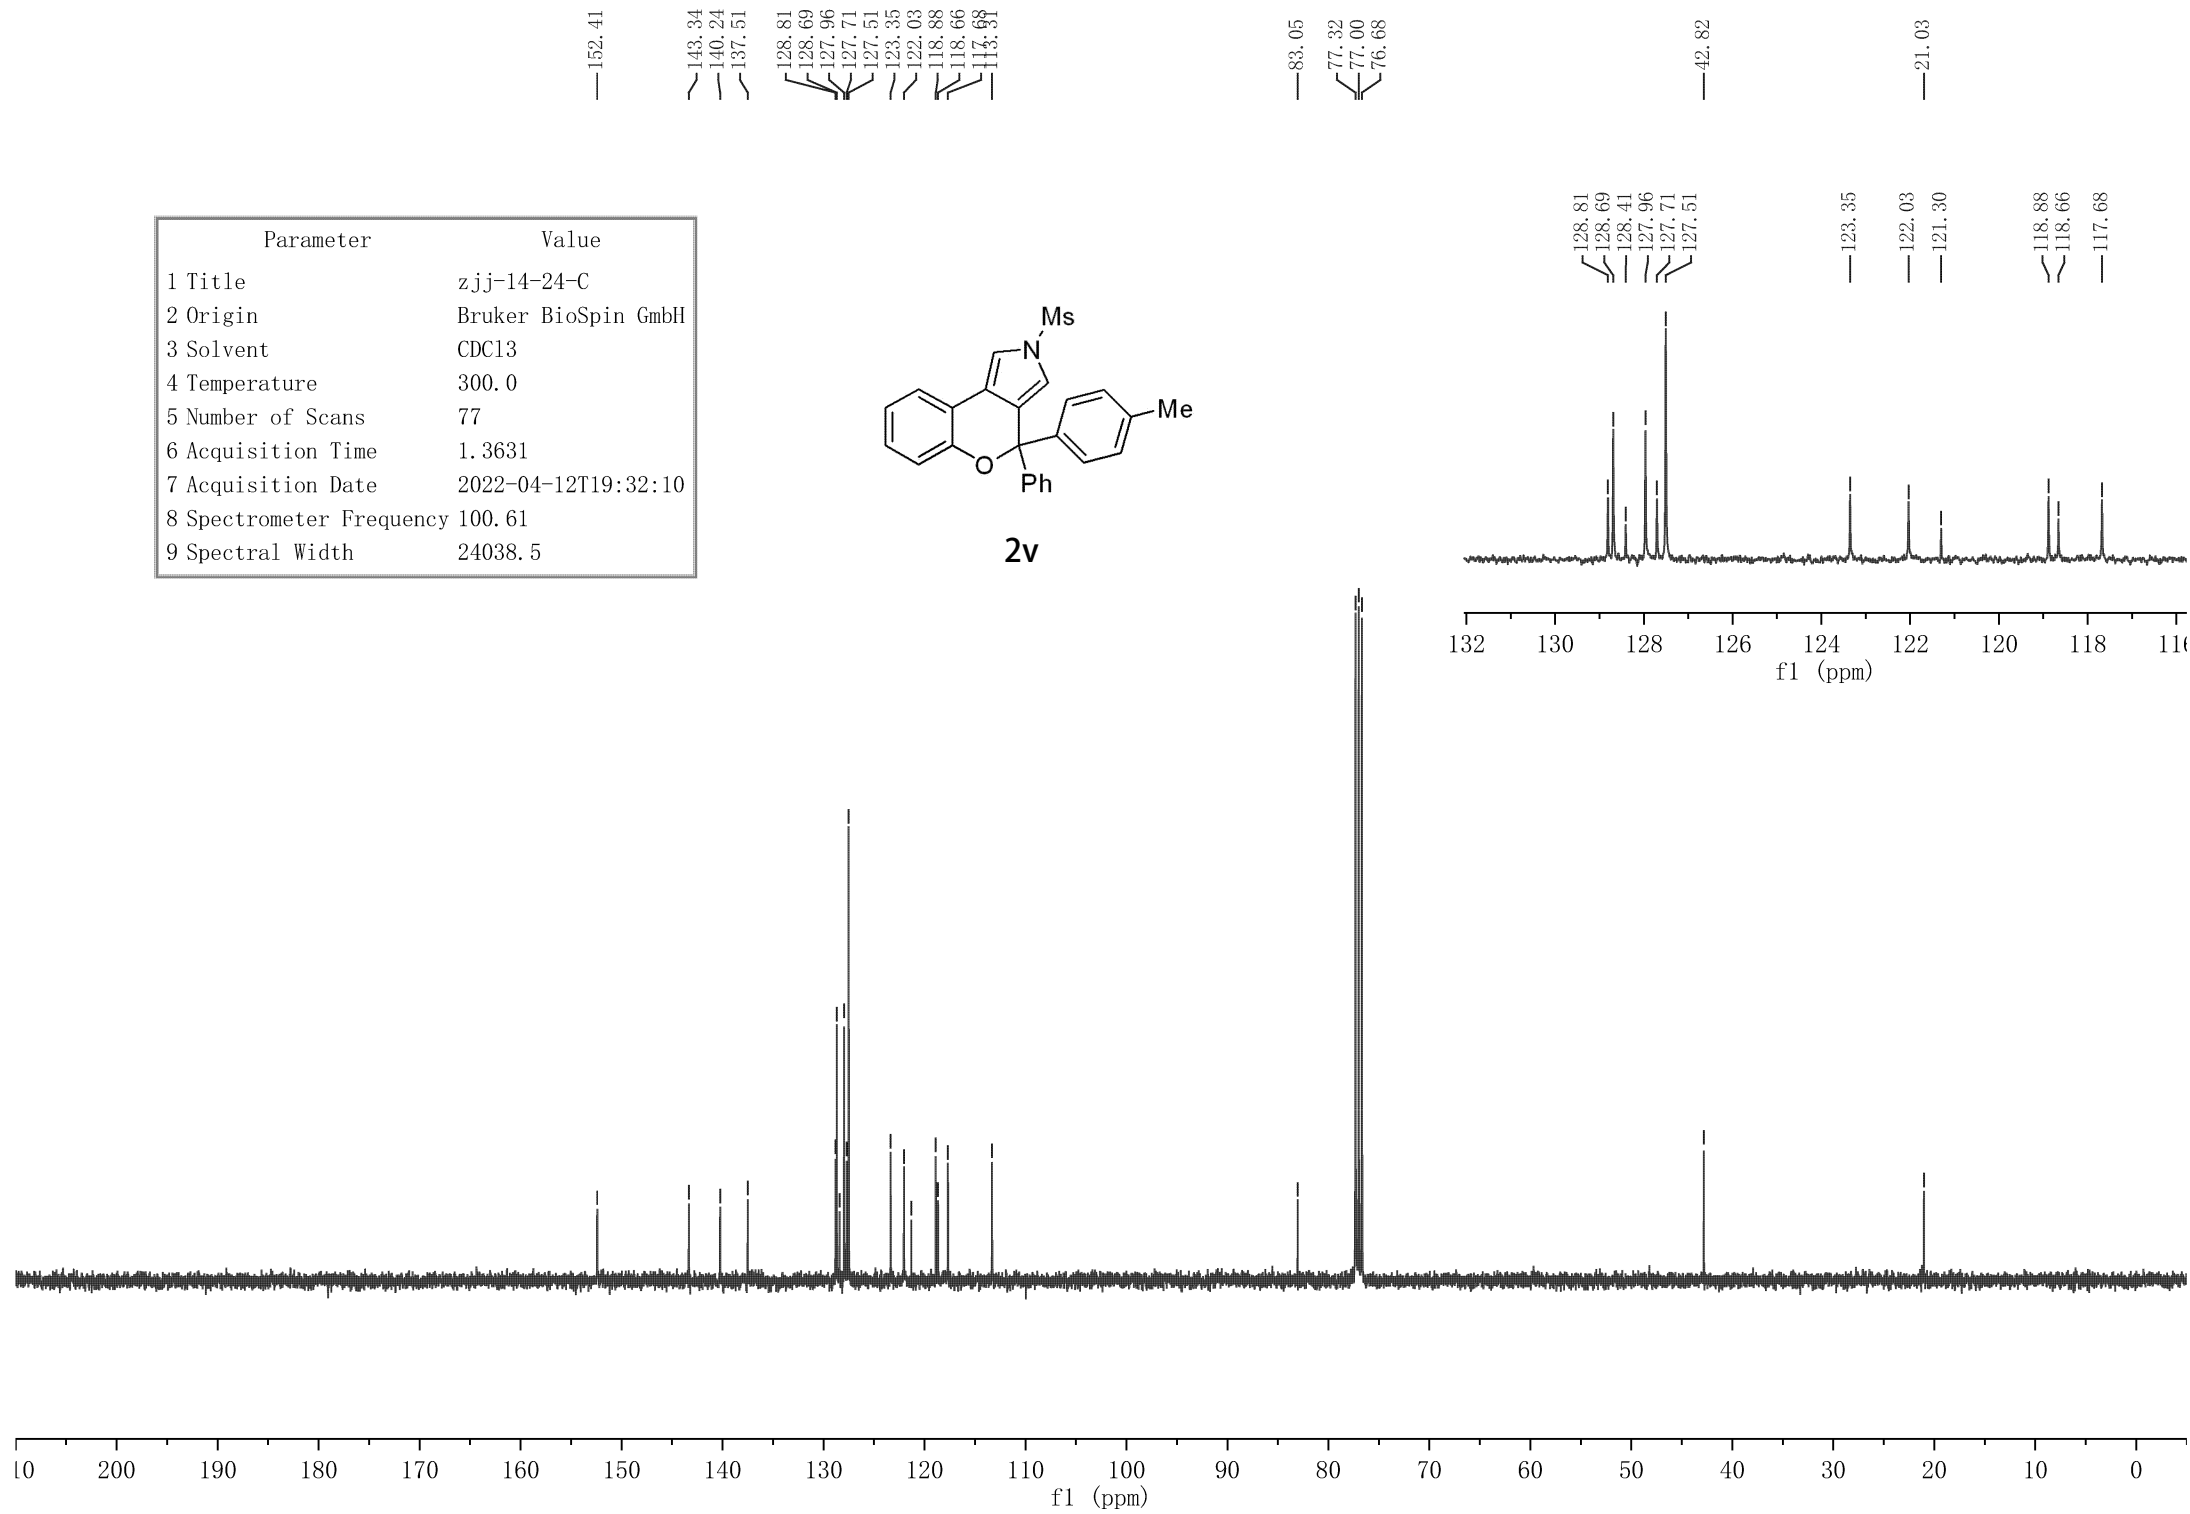

7.367  
7.362  
7.355  
7.321  
7.303  
7.282  
7.269  
7.248  
7.242  
7.222  
7.201  
7.137  
7.134  
7.116  
7.099  
7.061  
7.042  
6.898  
6.881  
6.733  
6.728

| Parameter                | Value               |
|--------------------------|---------------------|
| 1 Title                  | LFS-2-181-H         |
| 2 Origin                 | Bruker BioSpin GmbH |
| 3 Solvent                | CDC13               |
| 4 Temperature            | 298.05              |
| 5 Number of Scans        | 18                  |
| 6 Acquisition Time       | 4.0894              |
| 7 Acquisition Date       | 2022-04-25T09:36:20 |
| 8 Spectrometer Frequency | 400.13              |
| 9 Spectral Width         | 8012.8              |

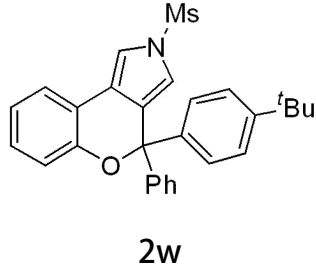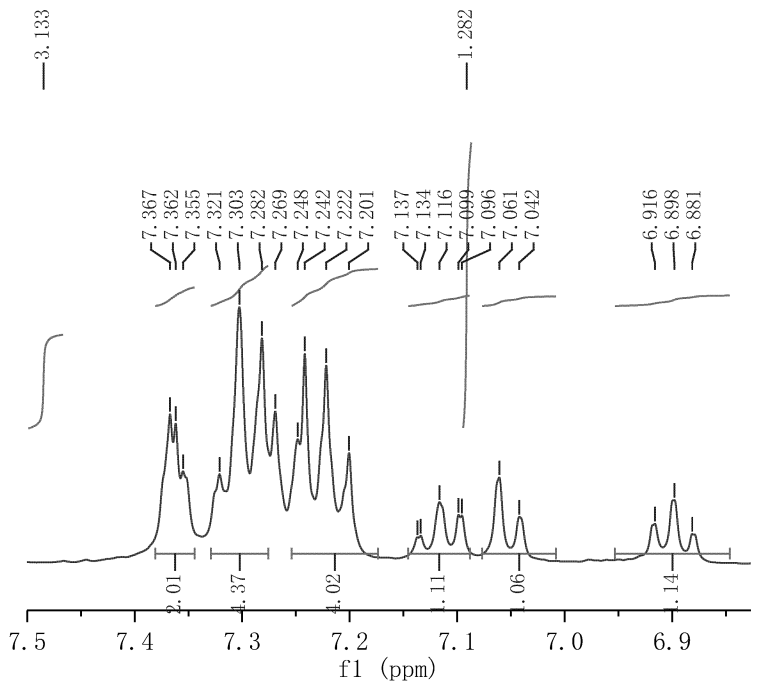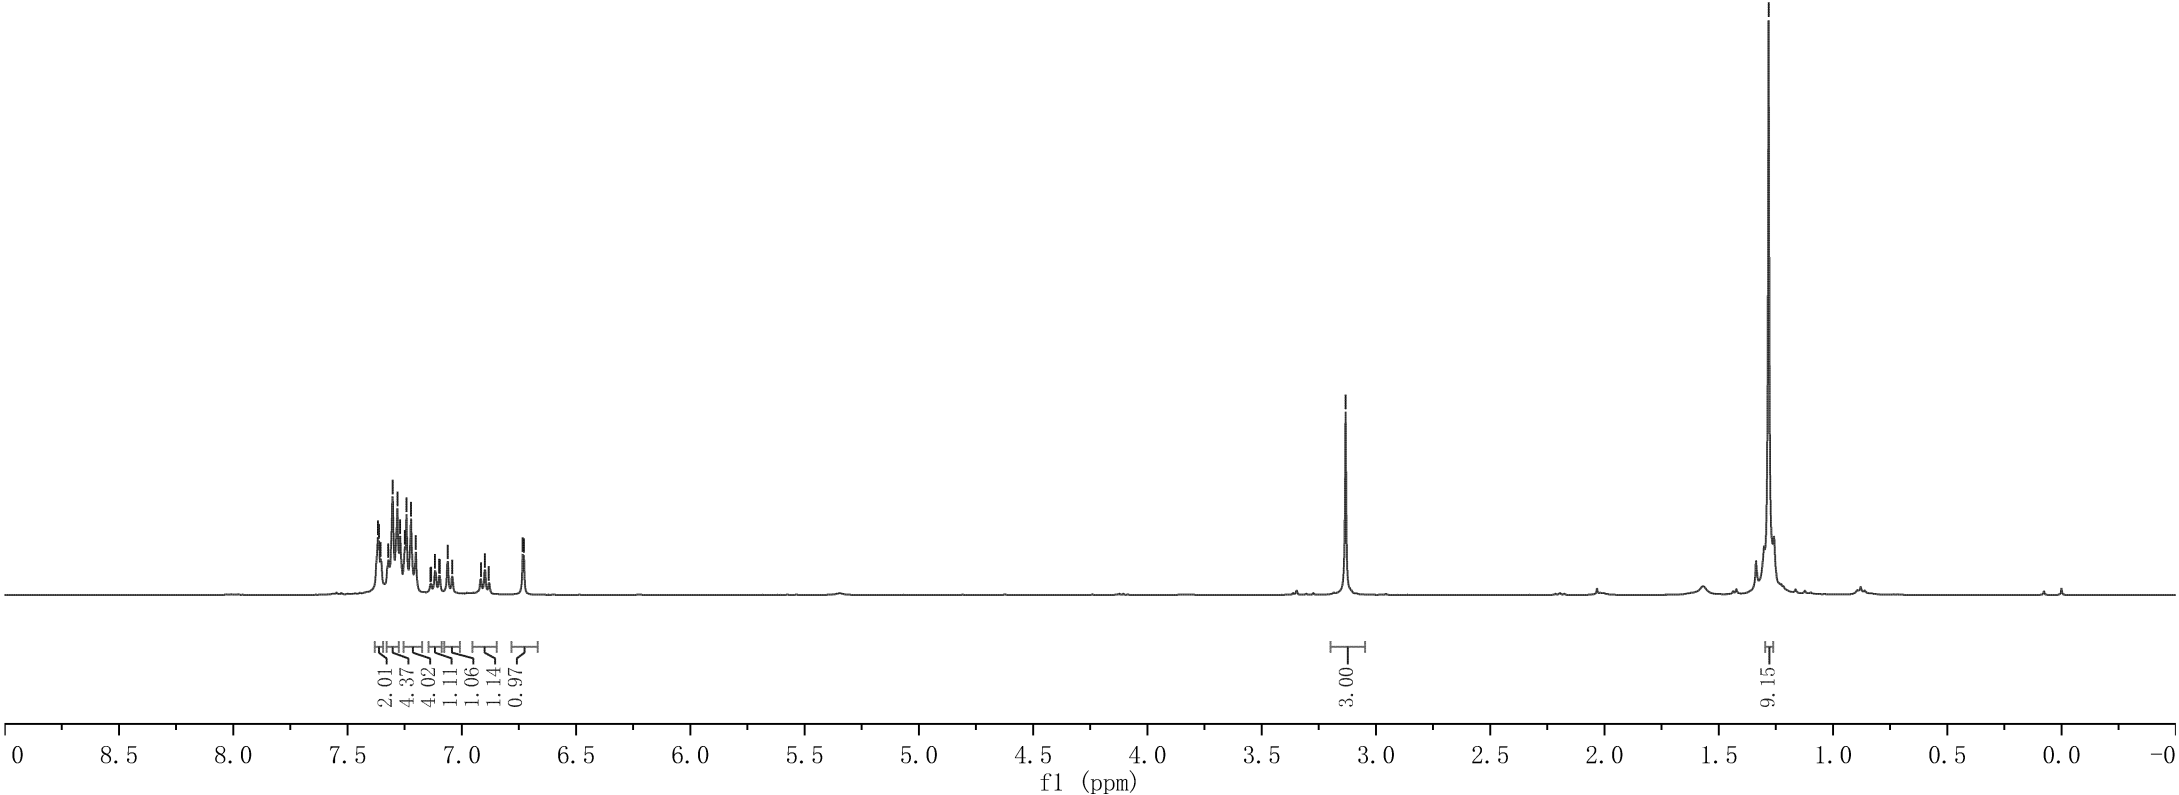

| Parameter                | Value               |
|--------------------------|---------------------|
| 1 Title                  | LFS-2-181-C         |
| 2 Origin                 | Bruker BioSpin GmbH |
| 3 Solvent                | CDC13               |
| 4 Temperature            | 300.0               |
| 5 Number of Scans        | 100                 |
| 6 Acquisition Time       | 1.3631              |
| 7 Acquisition Date       | 2022-04-25T09:38:41 |
| 8 Spectrometer Frequency | 100.61              |
| 9 Spectral Width         | 24038.5             |

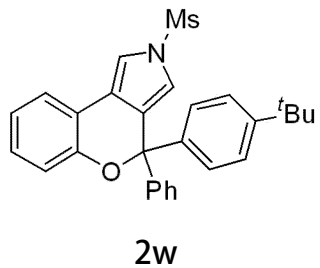

152.48  
150.61  
143.19  
140.17  
128.80  
128.39  
127.93  
127.70  
127.61  
127.21  
124.92  
123.36  
121.97  
118.88  
113.23

83.09  
77.32  
77.00  
76.68

42.82  
34.46  
31.27

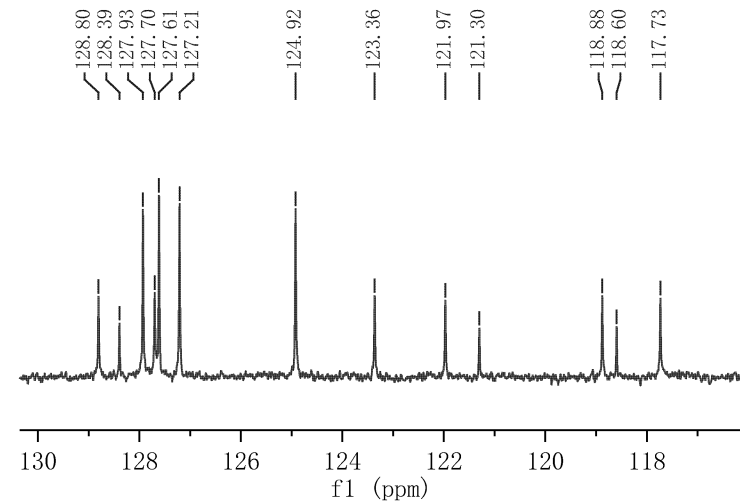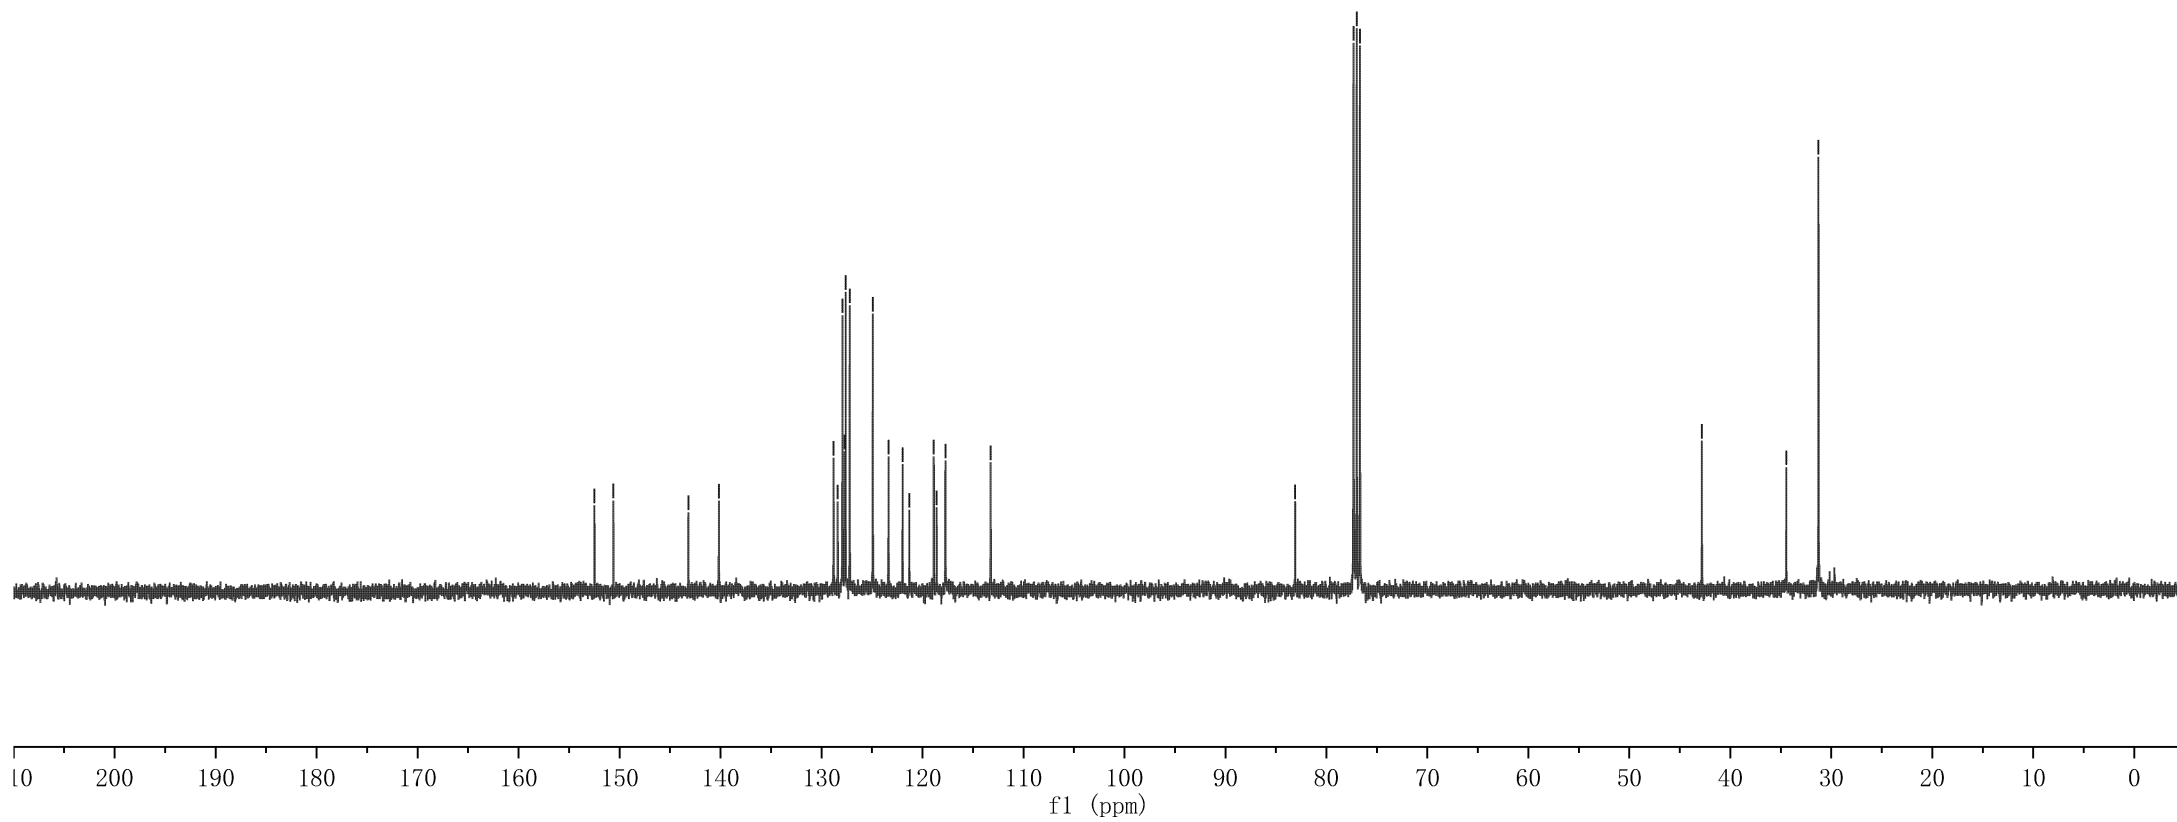



7.360  
7.355  
7.345  
7.330  
7.312  
7.290  
7.273  
7.253  
7.229  
7.120  
7.104  
7.085  
7.045  
7.025  
6.992  
6.988  
6.971  
6.906  
6.887  
6.869  
6.700  
6.696  
6.685  
6.663

| Parameter                | Value               |
|--------------------------|---------------------|
| 1 Title                  | LFS-2-211-H         |
| 2 Origin                 | Bruker BioSpin GmbH |
| 3 Solvent                | CDC13               |
| 4 Temperature            | 298.0               |
| 5 Number of Scans        | 22                  |
| 6 Acquisition Time       | 4.0894              |
| 7 Acquisition Date       | 2022-05-02T19:29:05 |
| 8 Spectrometer Frequency | 400.13              |
| 9 Spectral Width         | 8012.8              |

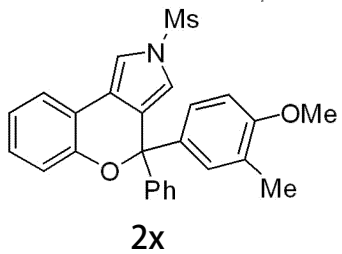

3.758

3.105

2.132

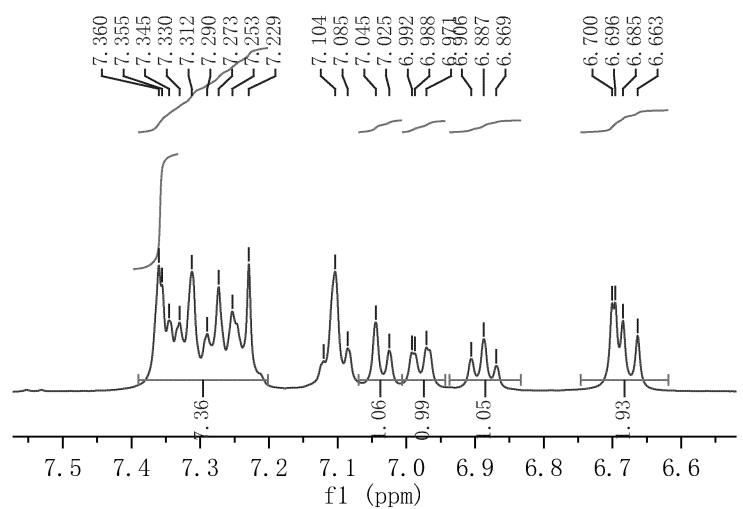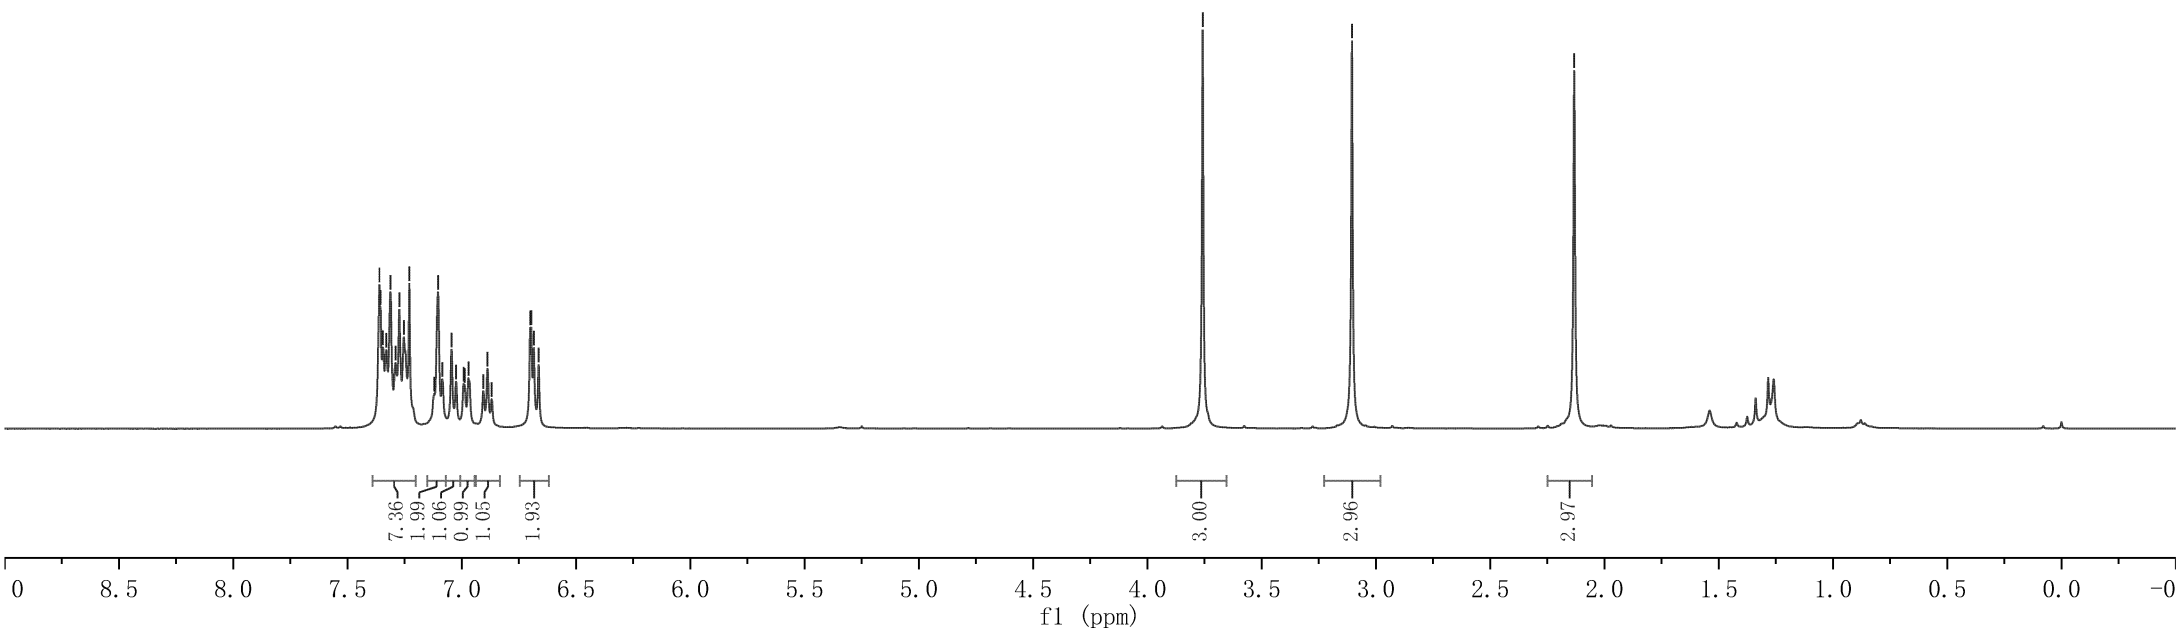

| Parameter                | Value               |
|--------------------------|---------------------|
| 1 Title                  | LFS-2-211-C         |
| 2 Origin                 | Bruker BioSpin GmbH |
| 3 Solvent                | CDC13               |
| 4 Temperature            | 300.0               |
| 5 Number of Scans        | 82                  |
| 6 Acquisition Time       | 1.3631              |
| 7 Acquisition Date       | 2022-05-02T19:31:52 |
| 8 Spectrometer Frequency | 100.61              |
| 9 Spectral Width         | 24038.5             |

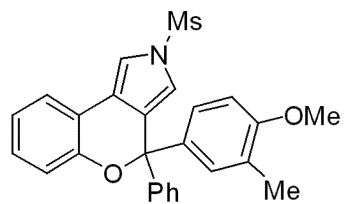

2x

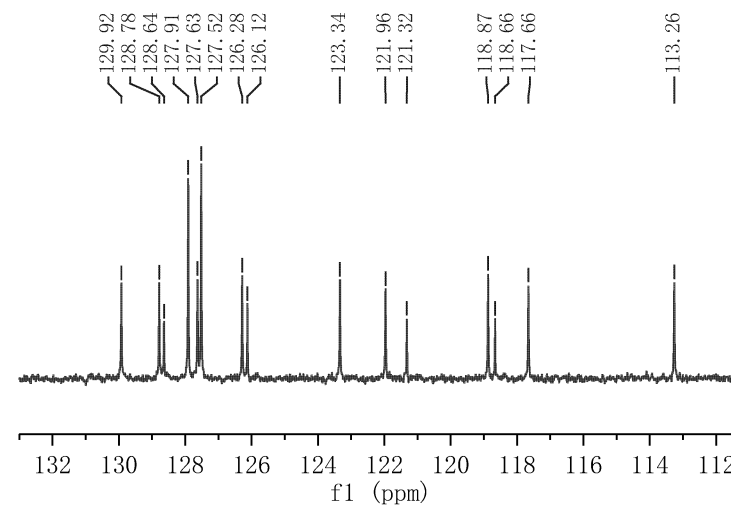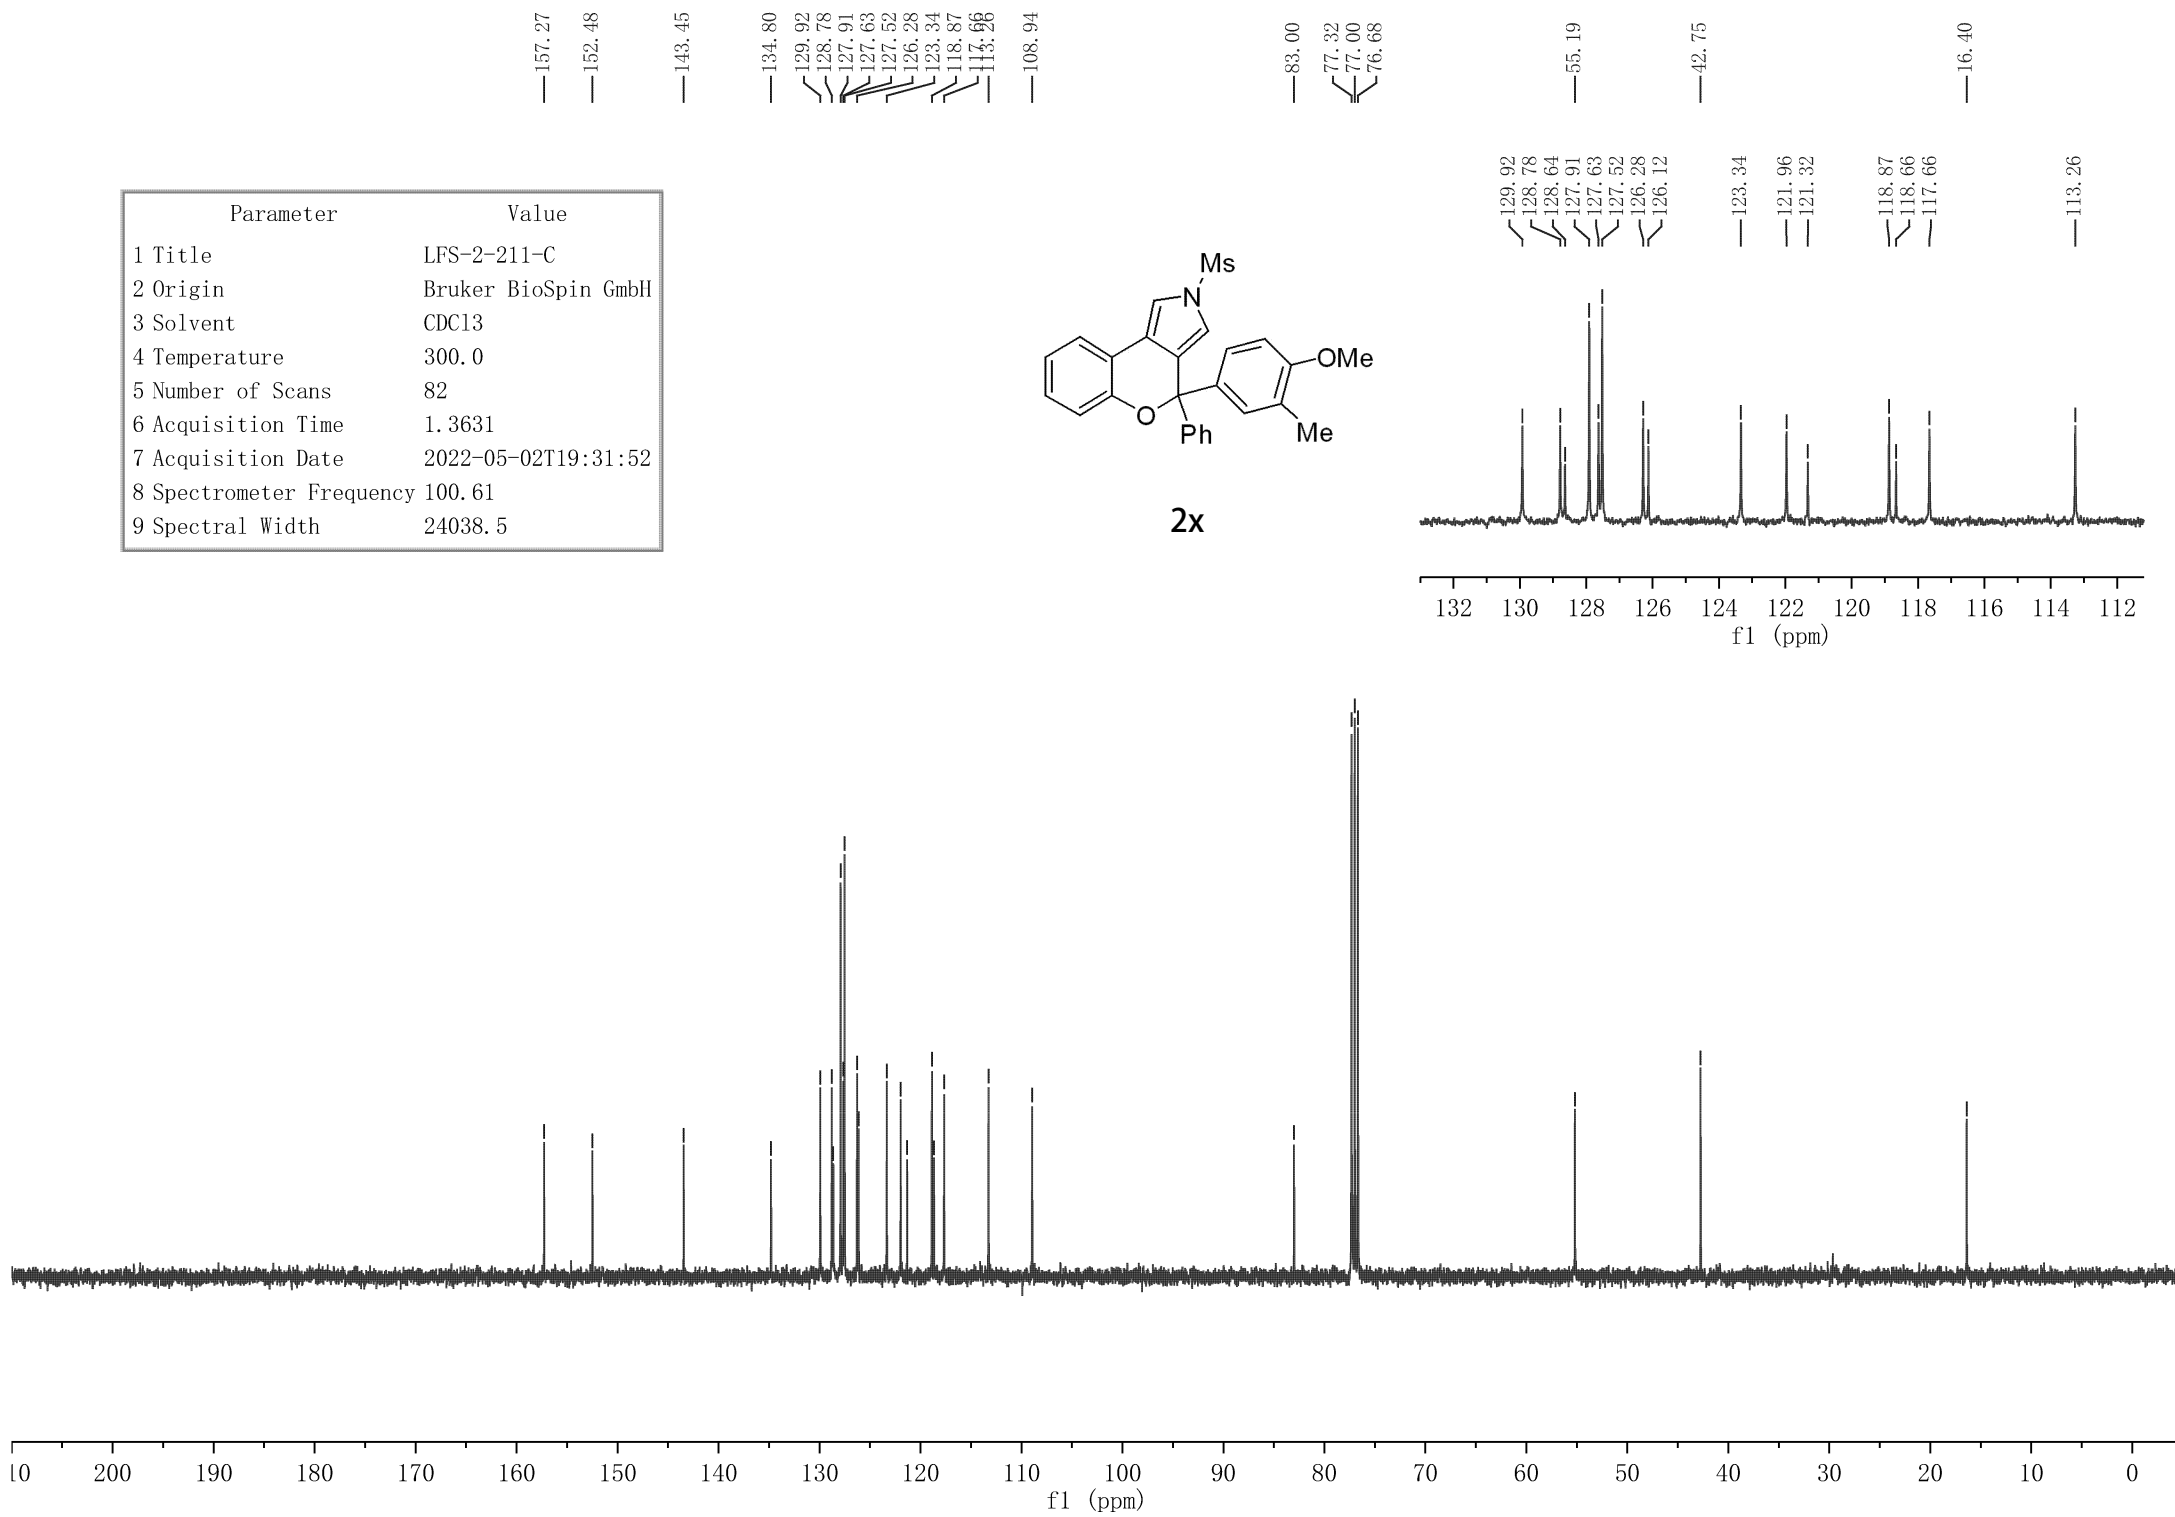

7.377  
7.371  
7.361  
7.358  
7.347  
7.342  
7.325  
7.322  
7.312  
7.307  
7.291  
7.272  
7.268  
7.247  
7.140  
7.136  
7.120  
7.102  
7.098  
7.057  
7.055  
7.036  
7.034  
6.991  
6.986  
6.928  
6.925  
6.909  
6.907  
6.891  
6.888  
6.722  
6.701  
6.696  
6.650  
6.645  
6.629  
6.624

3.817  
3.759

3.131

| Parameter                | Value               |
|--------------------------|---------------------|
| 1 Title                  | LFS-2-177-H         |
| 2 Origin                 | Bruker BioSpin GmbH |
| 3 Solvent                | CDCl <sub>3</sub>   |
| 4 Temperature            | 298.0               |
| 5 Number of Scans        | 14                  |
| 6 Acquisition Time       | 4.0894              |
| 7 Acquisition Date       | 2022-04-22T15:08:22 |
| 8 Spectrometer Frequency | 400.13              |
| 9 Spectral Width         | 8012.8              |

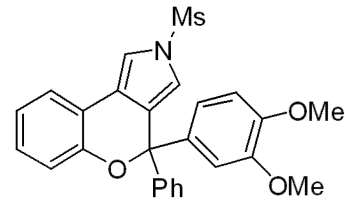

2y

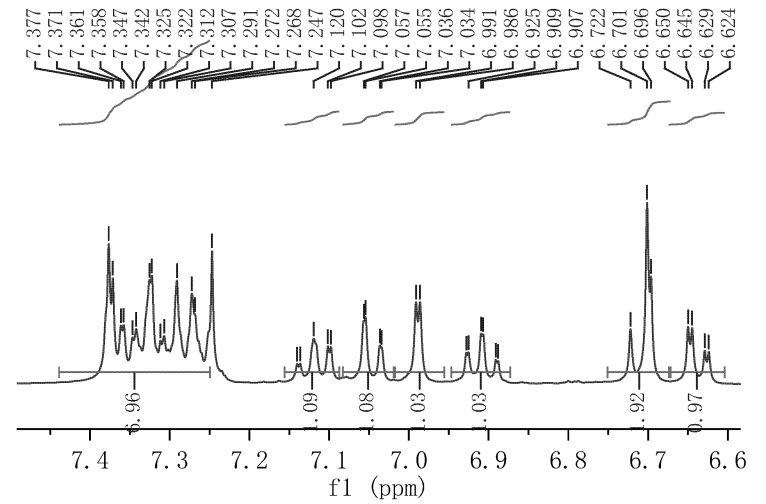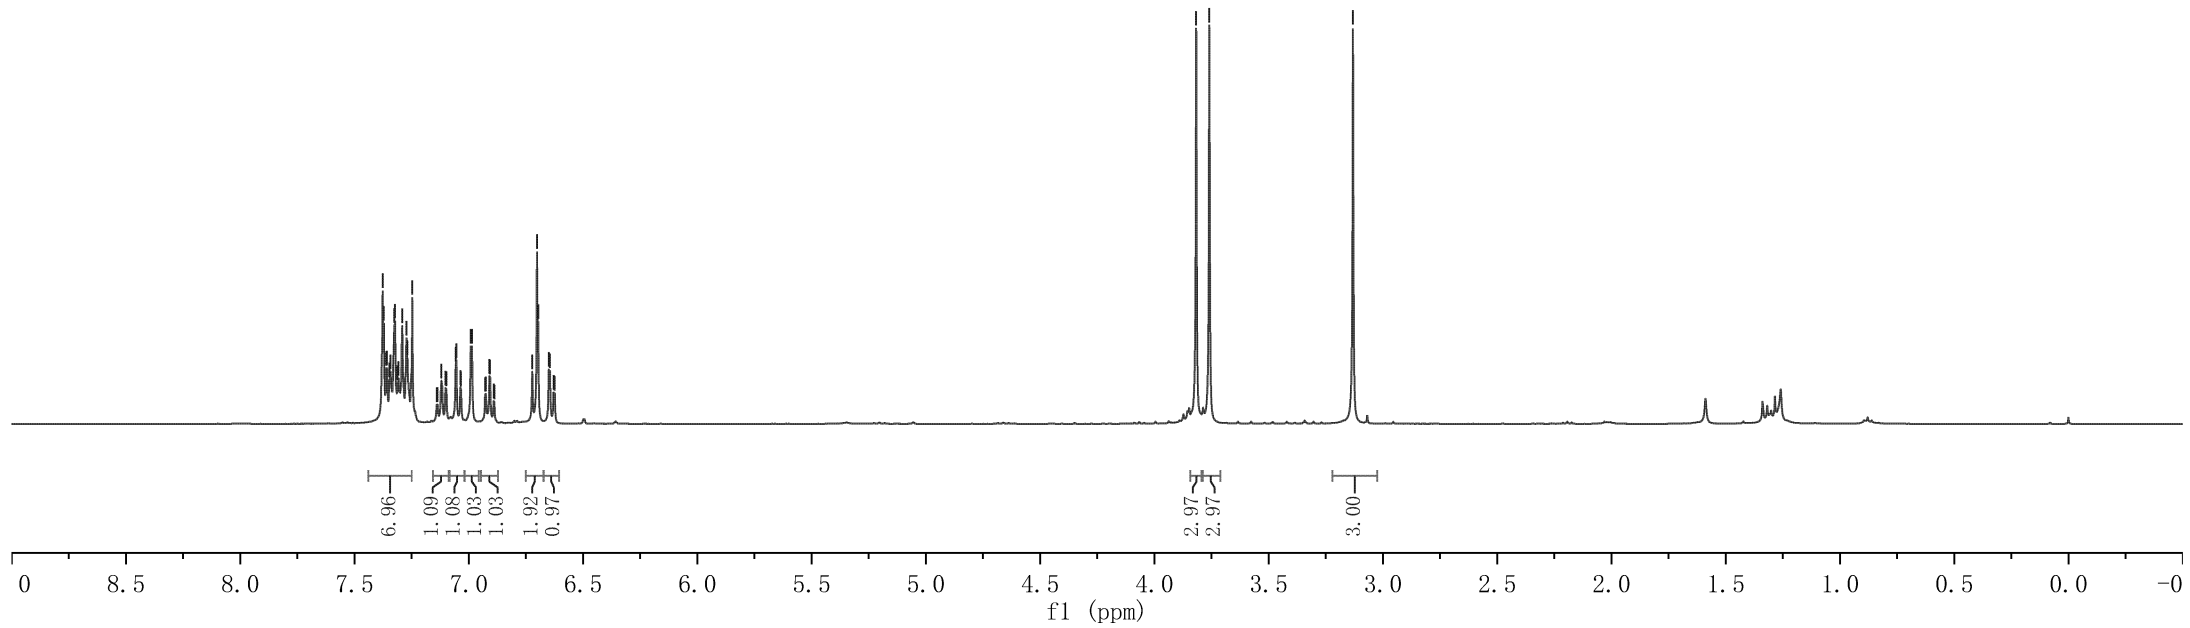

| Parameter                | Value               |
|--------------------------|---------------------|
| 1 Title                  | LFS-2-177-C         |
| 2 Origin                 | Bruker BioSpin GmbH |
| 3 Solvent                | CDC13               |
| 4 Temperature            | 300.0               |
| 5 Number of Scans        | 99                  |
| 6 Acquisition Time       | 1.3631              |
| 7 Acquisition Date       | 2022-04-22T15:10:36 |
| 8 Spectrometer Frequency | 100.61              |
| 9 Spectral Width         | 24038.5             |

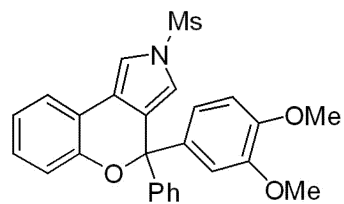

2y

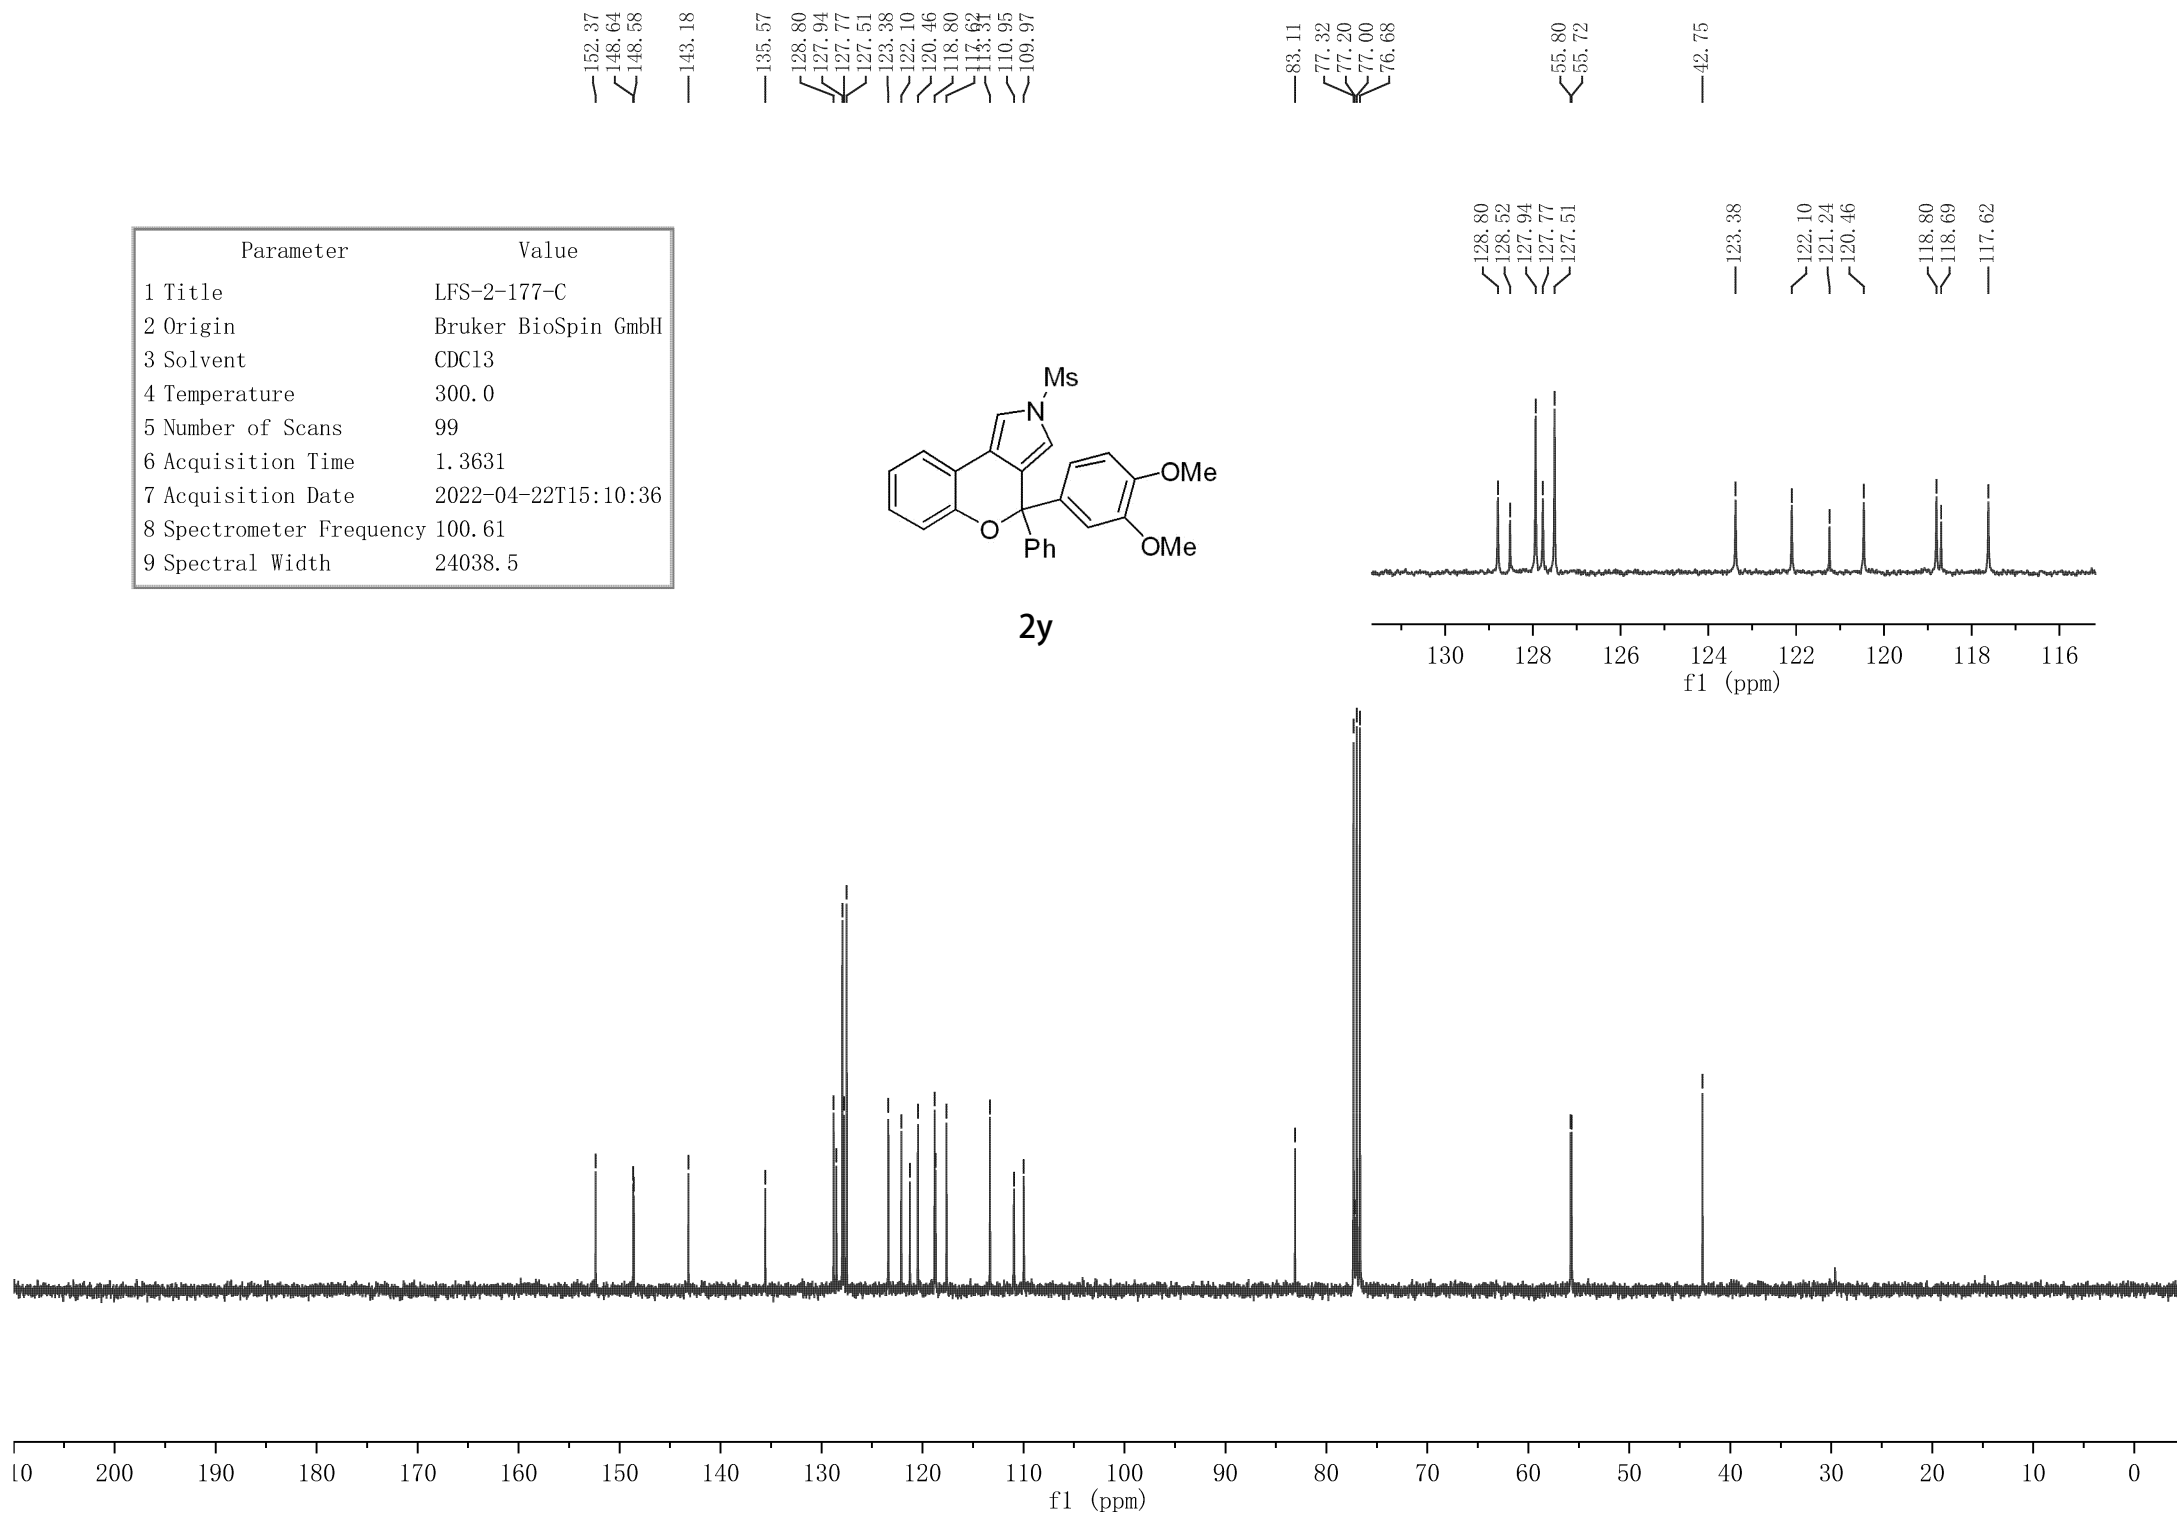

| Parameter                | Value               |
|--------------------------|---------------------|
| 1 Title                  | zjj-14-34-H         |
| 2 Origin                 | Bruker BioSpin GmbH |
| 3 Solvent                | CDC13               |
| 4 Temperature            | 298.0               |
| 5 Number of Scans        | 7                   |
| 6 Acquisition Time       | 4.0894              |
| 7 Acquisition Date       | 2022-04-16T21:07:37 |
| 8 Spectrometer Frequency | 400.13              |
| 9 Spectral Width         | 8012.8              |

7.371  
7.366  
7.359  
7.356  
7.344  
7.340  
7.321  
7.312  
7.308  
7.292  
7.271  
7.266  
7.245  
7.139  
7.121  
7.103  
7.100  
7.043  
7.024  
6.931  
6.914  
6.895  
6.853  
6.715  
6.710  
6.658  
5.899

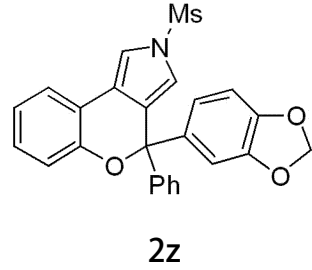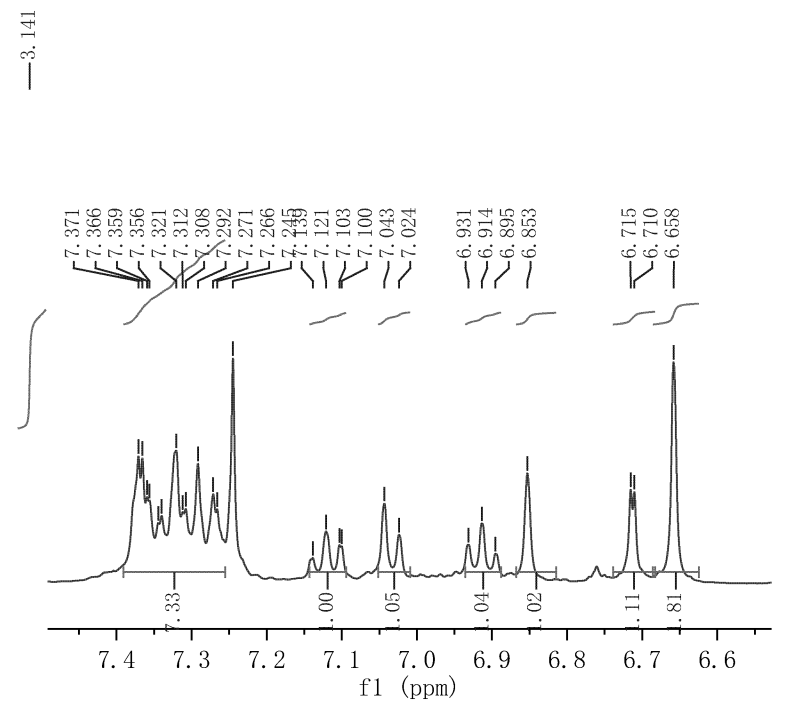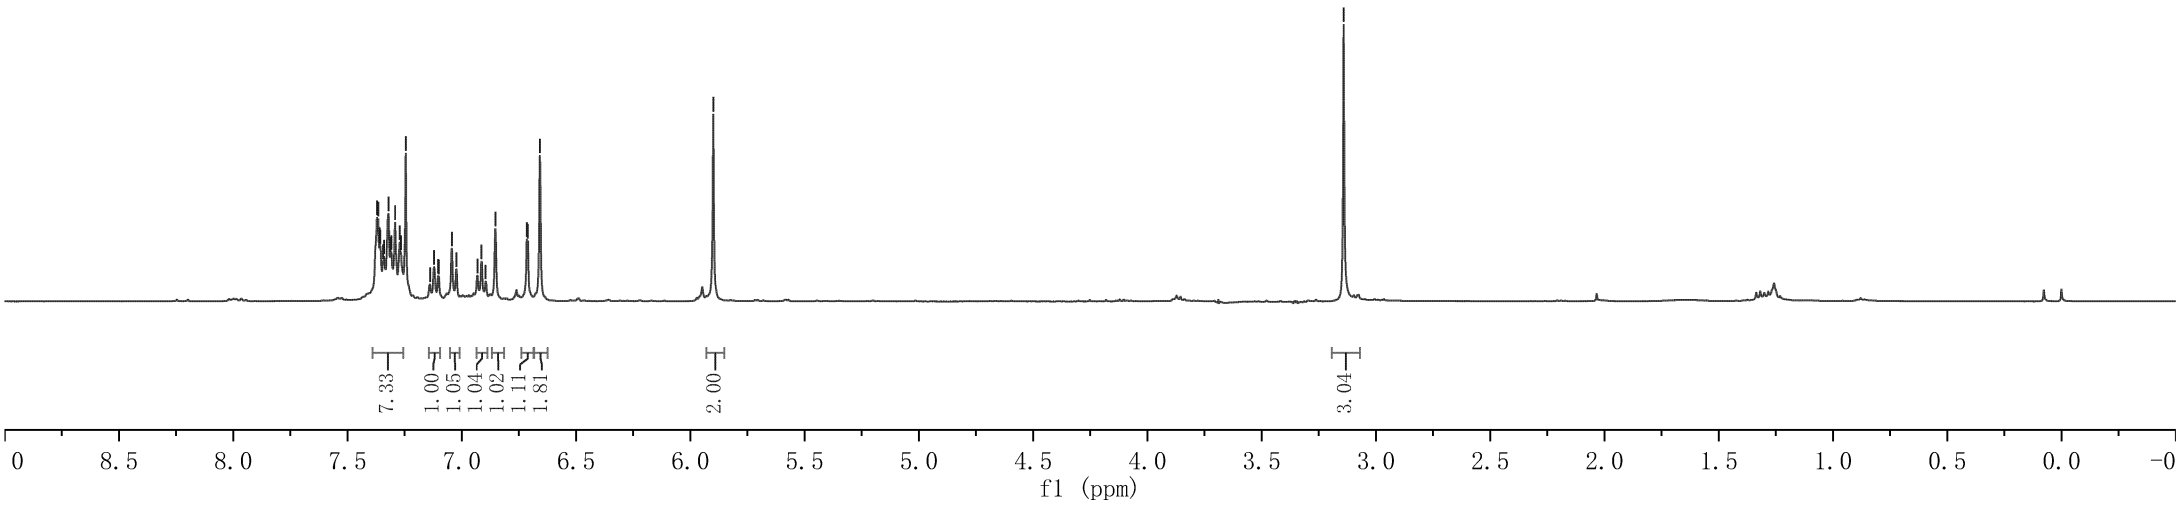

—3.141

| Parameter                | Value               |
|--------------------------|---------------------|
| 1 Title                  | zjj-14-34-C         |
| 2 Origin                 | Bruker BioSpin GmbH |
| 3 Solvent                | CDC13               |
| 4 Temperature            | 300.0               |
| 5 Number of Scans        | 48                  |
| 6 Acquisition Time       | 1.3631              |
| 7 Acquisition Date       | 2022-04-16T21:08:46 |
| 8 Spectrometer Frequency | 100.61              |
| 9 Spectral Width         | 24038.5             |

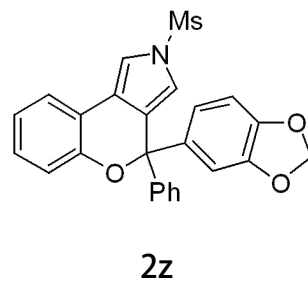

152.24  
 147.58  
 147.18  
 143.21  
 137.21  
 128.83  
 128.27  
 128.01  
 127.77  
 127.36  
 123.36  
 122.13  
 121.46  
 118.88  
 117.55  
 108.43  
 107.32  
 101.13  
 82.96  
 77.32  
 77.00  
 76.68  
 42.84

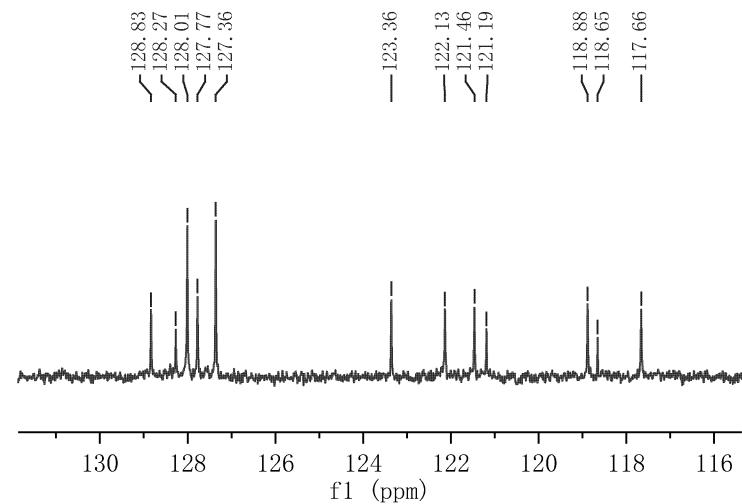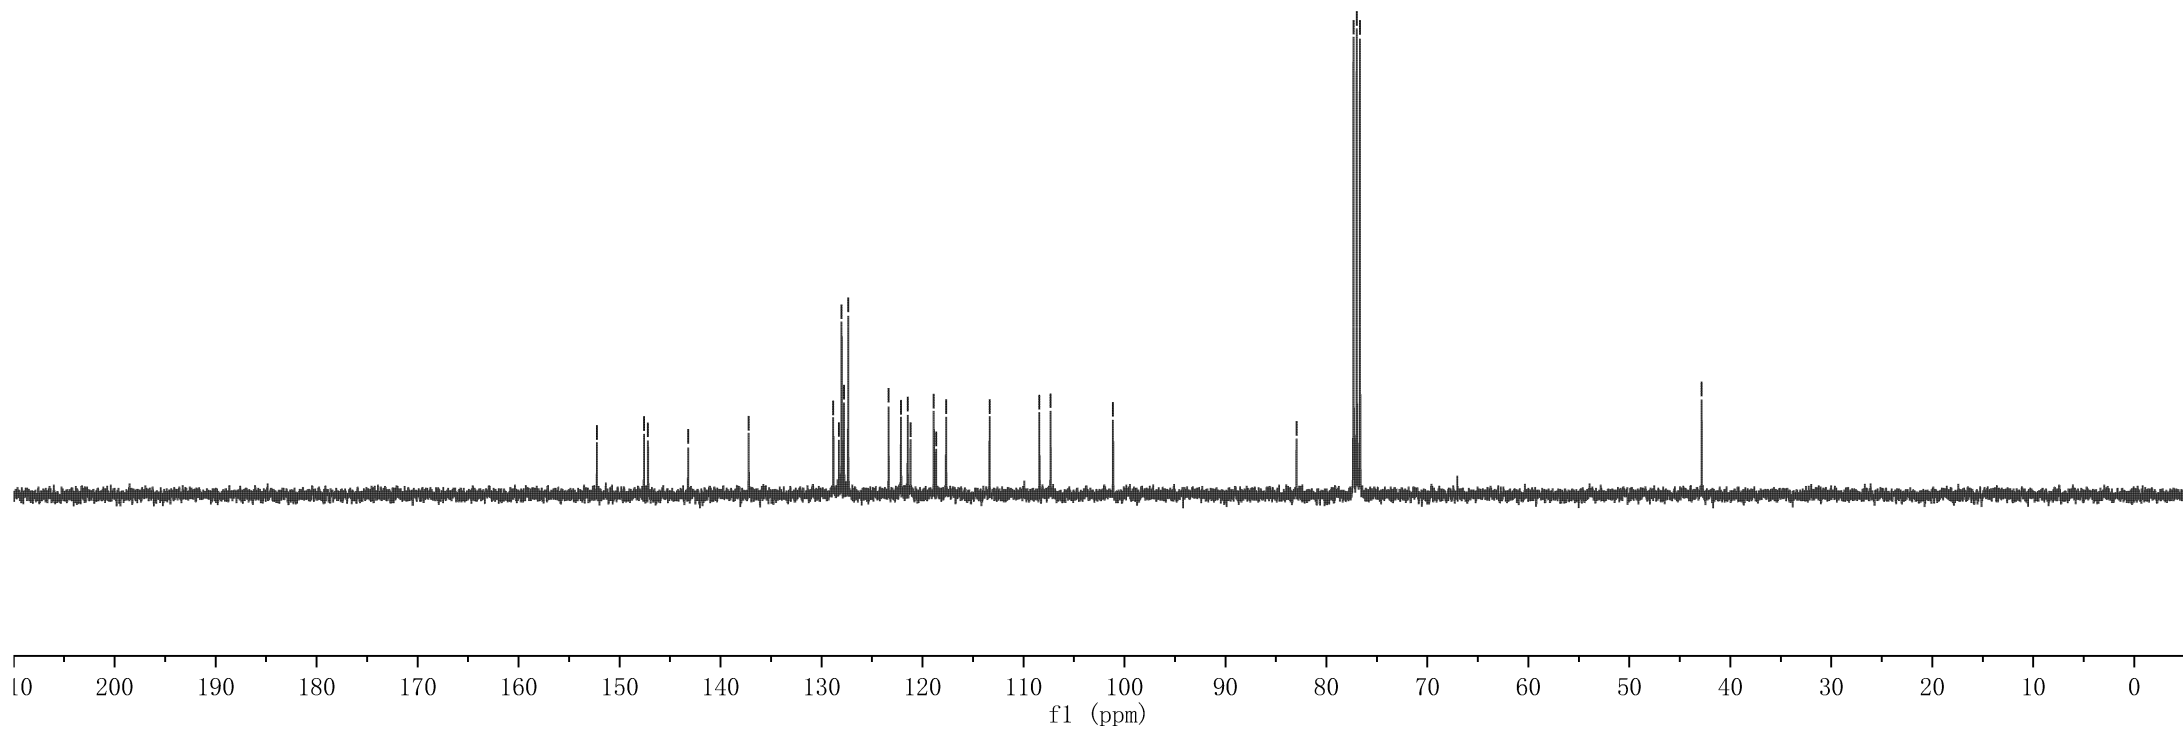

7.791  
7.784  
7.772  
7.751  
7.739  
7.723  
7.715  
7.611  
7.539  
7.535  
7.518  
7.513  
7.467  
7.455  
7.450  
7.441  
7.432  
7.427  
7.413  
7.408  
7.379  
7.375  
7.369  
7.359  
7.355  
7.323  
7.316  
7.312  
7.302  
7.293  
7.282  
7.267  
7.128  
7.124  
7.108  
7.104  
7.090  
7.084  
7.080  
7.064  
6.915  
6.910  
6.896  
6.894  
6.879  
6.874  
6.756  
6.751

| Parameter                | Value               |
|--------------------------|---------------------|
| 1 Title                  | zjj-14-40-II        |
| 2 Origin                 | Bruker BioSpin GmbH |
| 3 Solvent                | CDCl3               |
| 4 Temperature            | 298.0               |
| 5 Number of Scans        | 8                   |
| 6 Acquisition Time       | 4.0894              |
| 7 Acquisition Date       | 2022-04-22T21:54:05 |
| 8 Spectrometer Frequency | 400.13              |
| 9 Spectral Width         | 8012.8              |

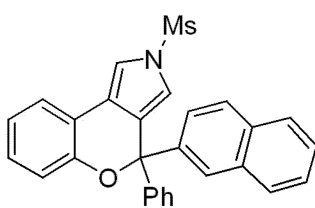

2aa

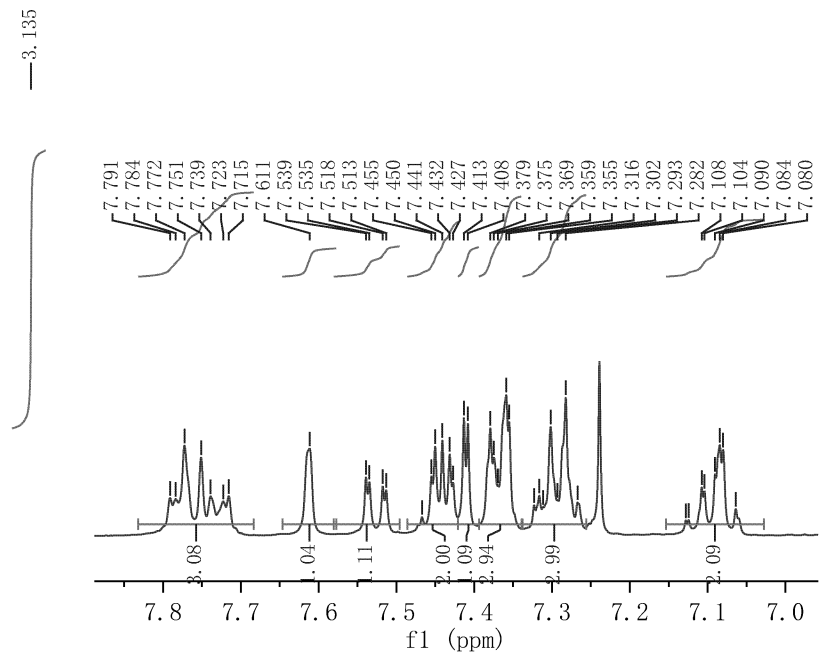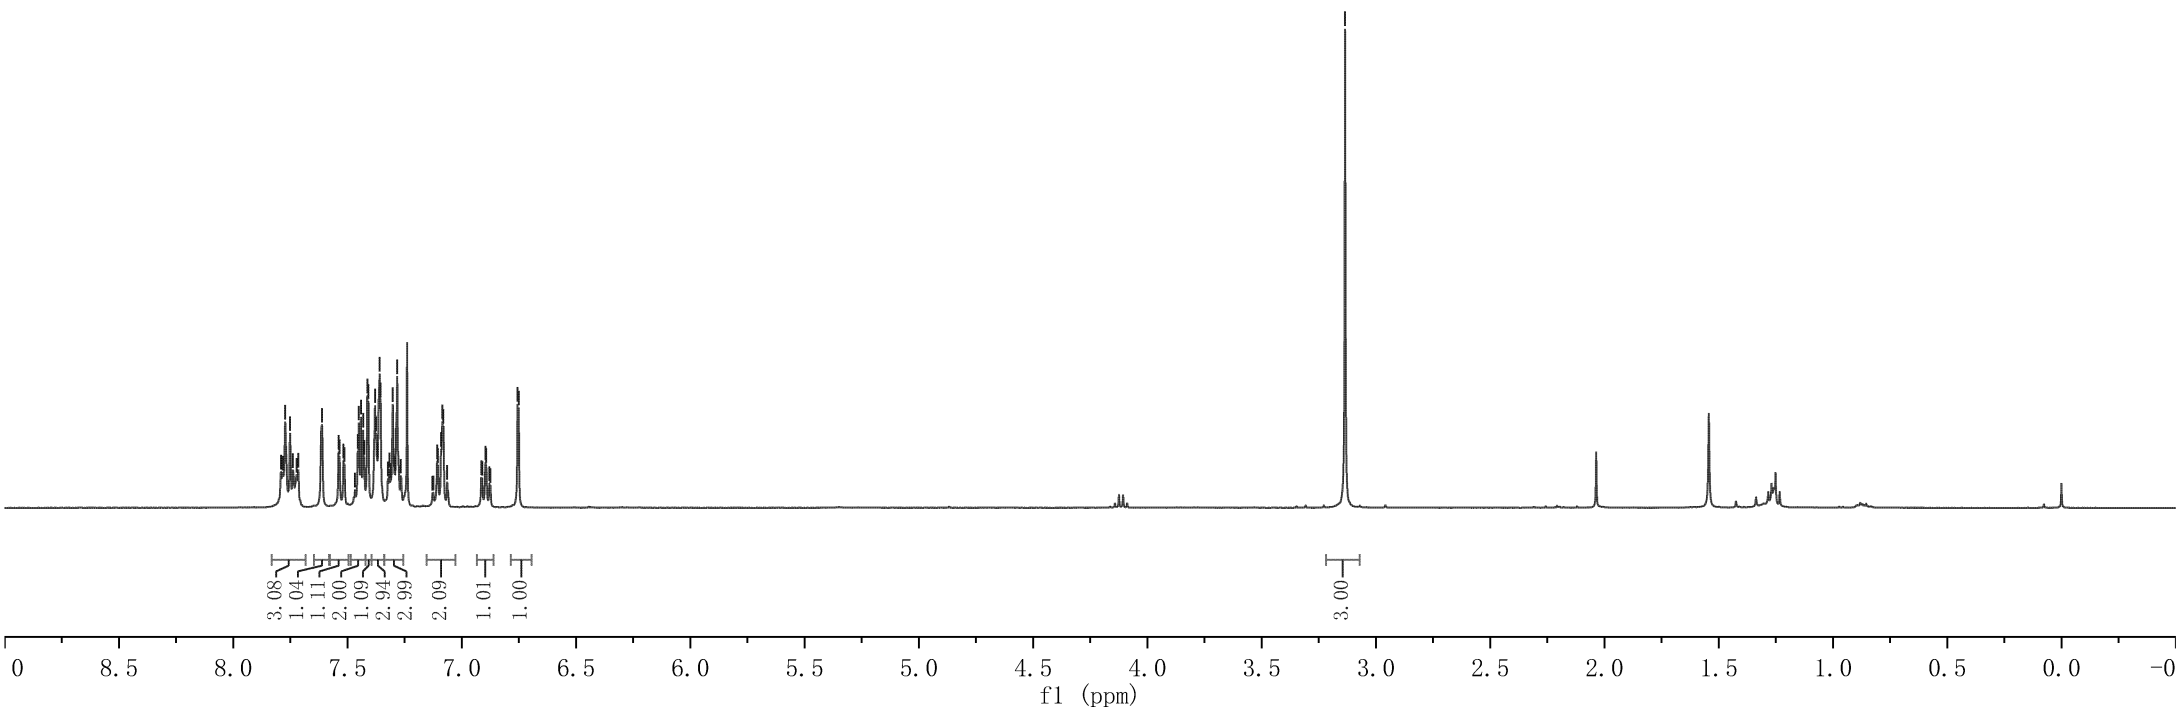

| Parameter                | Value               |
|--------------------------|---------------------|
| 1 Title                  | zjj-14-40-C         |
| 2 Origin                 | Bruker BioSpin GmbH |
| 3 Solvent                | CDC13               |
| 4 Temperature            | 300.0               |
| 5 Number of Scans        | 117                 |
| 6 Acquisition Time       | 1.3631              |
| 7 Acquisition Date       | 2022-04-22T21:57:27 |
| 8 Spectrometer Frequency | 100.61              |
| 9 Spectral Width         | 24038.5             |

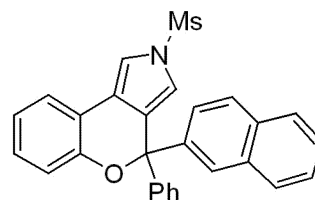

**2aa**

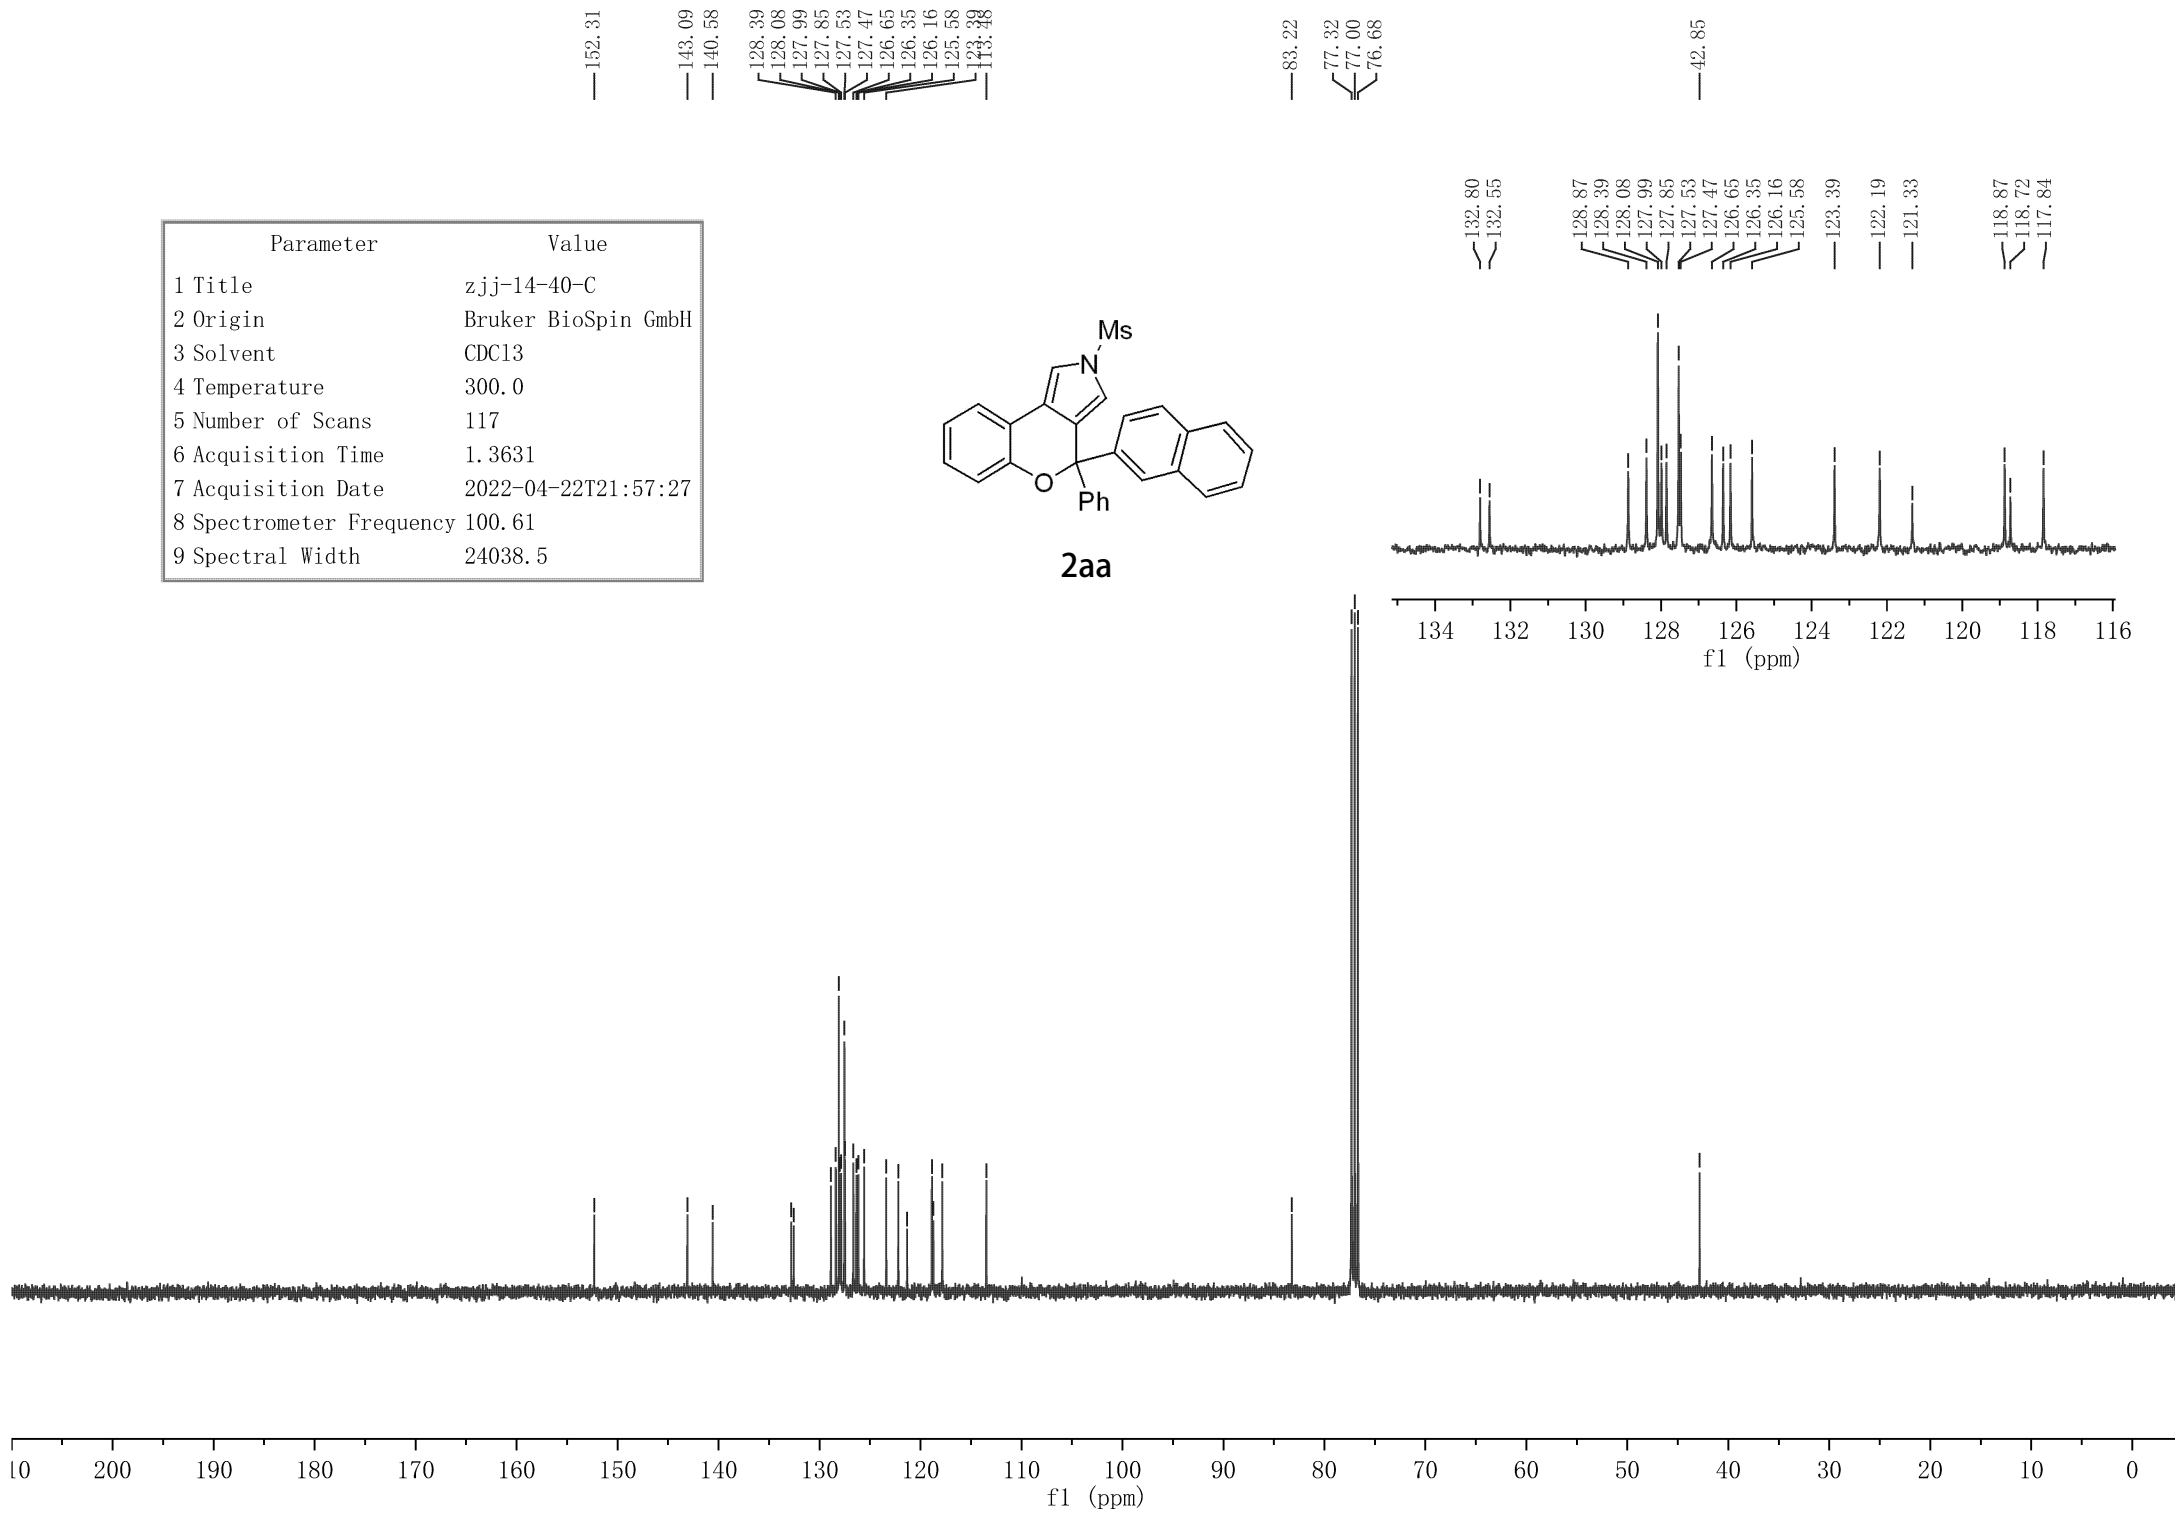



7.384  
7.381  
7.374  
7.367  
7.363  
7.317  
7.301  
7.282  
7.277  
7.260  
7.241  
7.234  
7.229  
7.221  
7.146  
7.143  
7.126  
7.108  
7.104  
7.047  
7.029  
7.019  
7.016  
6.940  
6.937  
6.920  
6.918  
6.910  
6.903  
6.900  
6.760  
6.755

| Parameter                | Value               |
|--------------------------|---------------------|
| 1 Title                  | LFS-2-179-H         |
| 2 Origin                 | Bruker BioSpin GmbH |
| 3 Solvent                | CDC13               |
| 4 Temperature            | 298.0               |
| 5 Number of Scans        | 20                  |
| 6 Acquisition Time       | 4.0894              |
| 7 Acquisition Date       | 2022-04-25T09:25:19 |
| 8 Spectrometer Frequency | 400.13              |
| 9 Spectral Width         | 8012.8              |

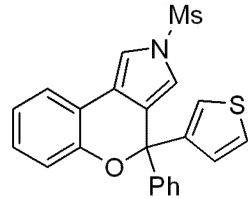

**2ab**

3.137

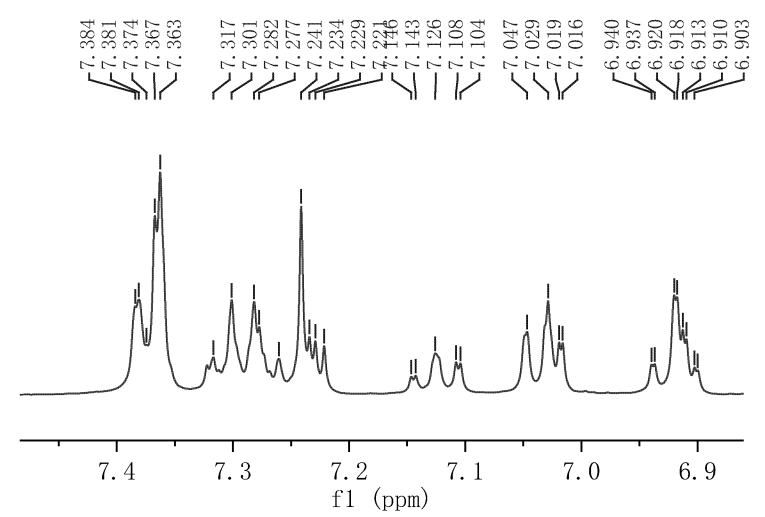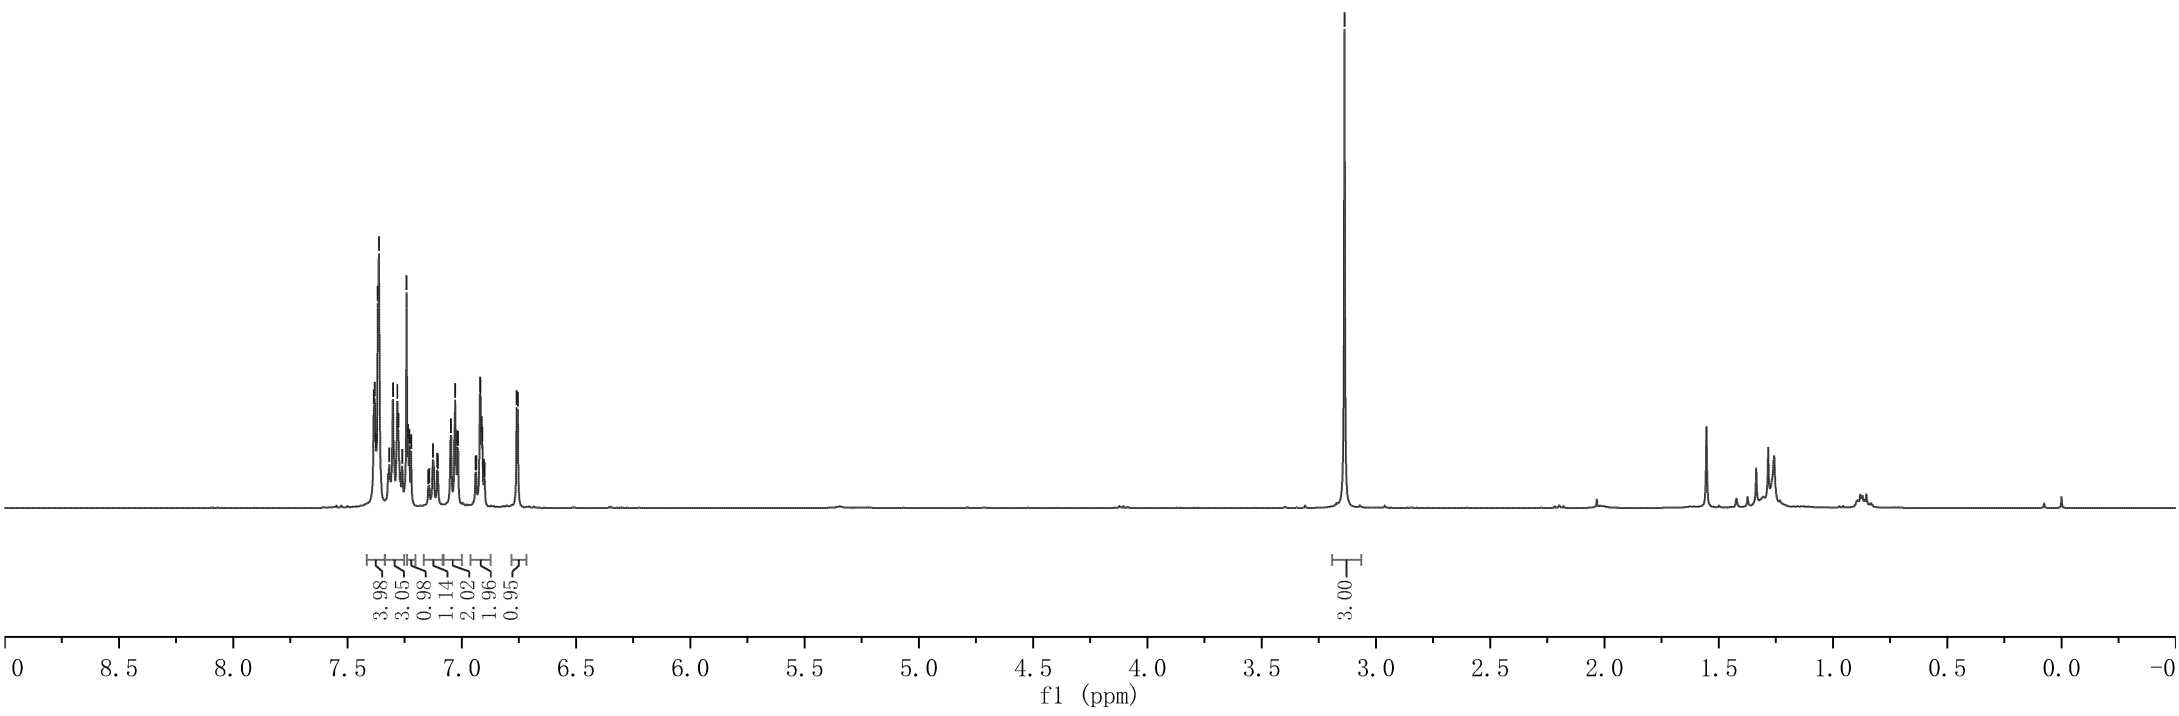

| Parameter                | Value               |
|--------------------------|---------------------|
| 1 Title                  | LFS-2-179-C         |
| 2 Origin                 | Bruker BioSpin GmbH |
| 3 Solvent                | CDC13               |
| 4 Temperature            | 300.0               |
| 5 Number of Scans        | 94                  |
| 6 Acquisition Time       | 1.3631              |
| 7 Acquisition Date       | 2022-04-25T09:28:01 |
| 8 Spectrometer Frequency | 100.61              |
| 9 Spectral Width         | 24038.5             |

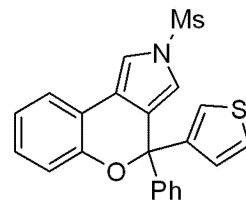

**2ab**

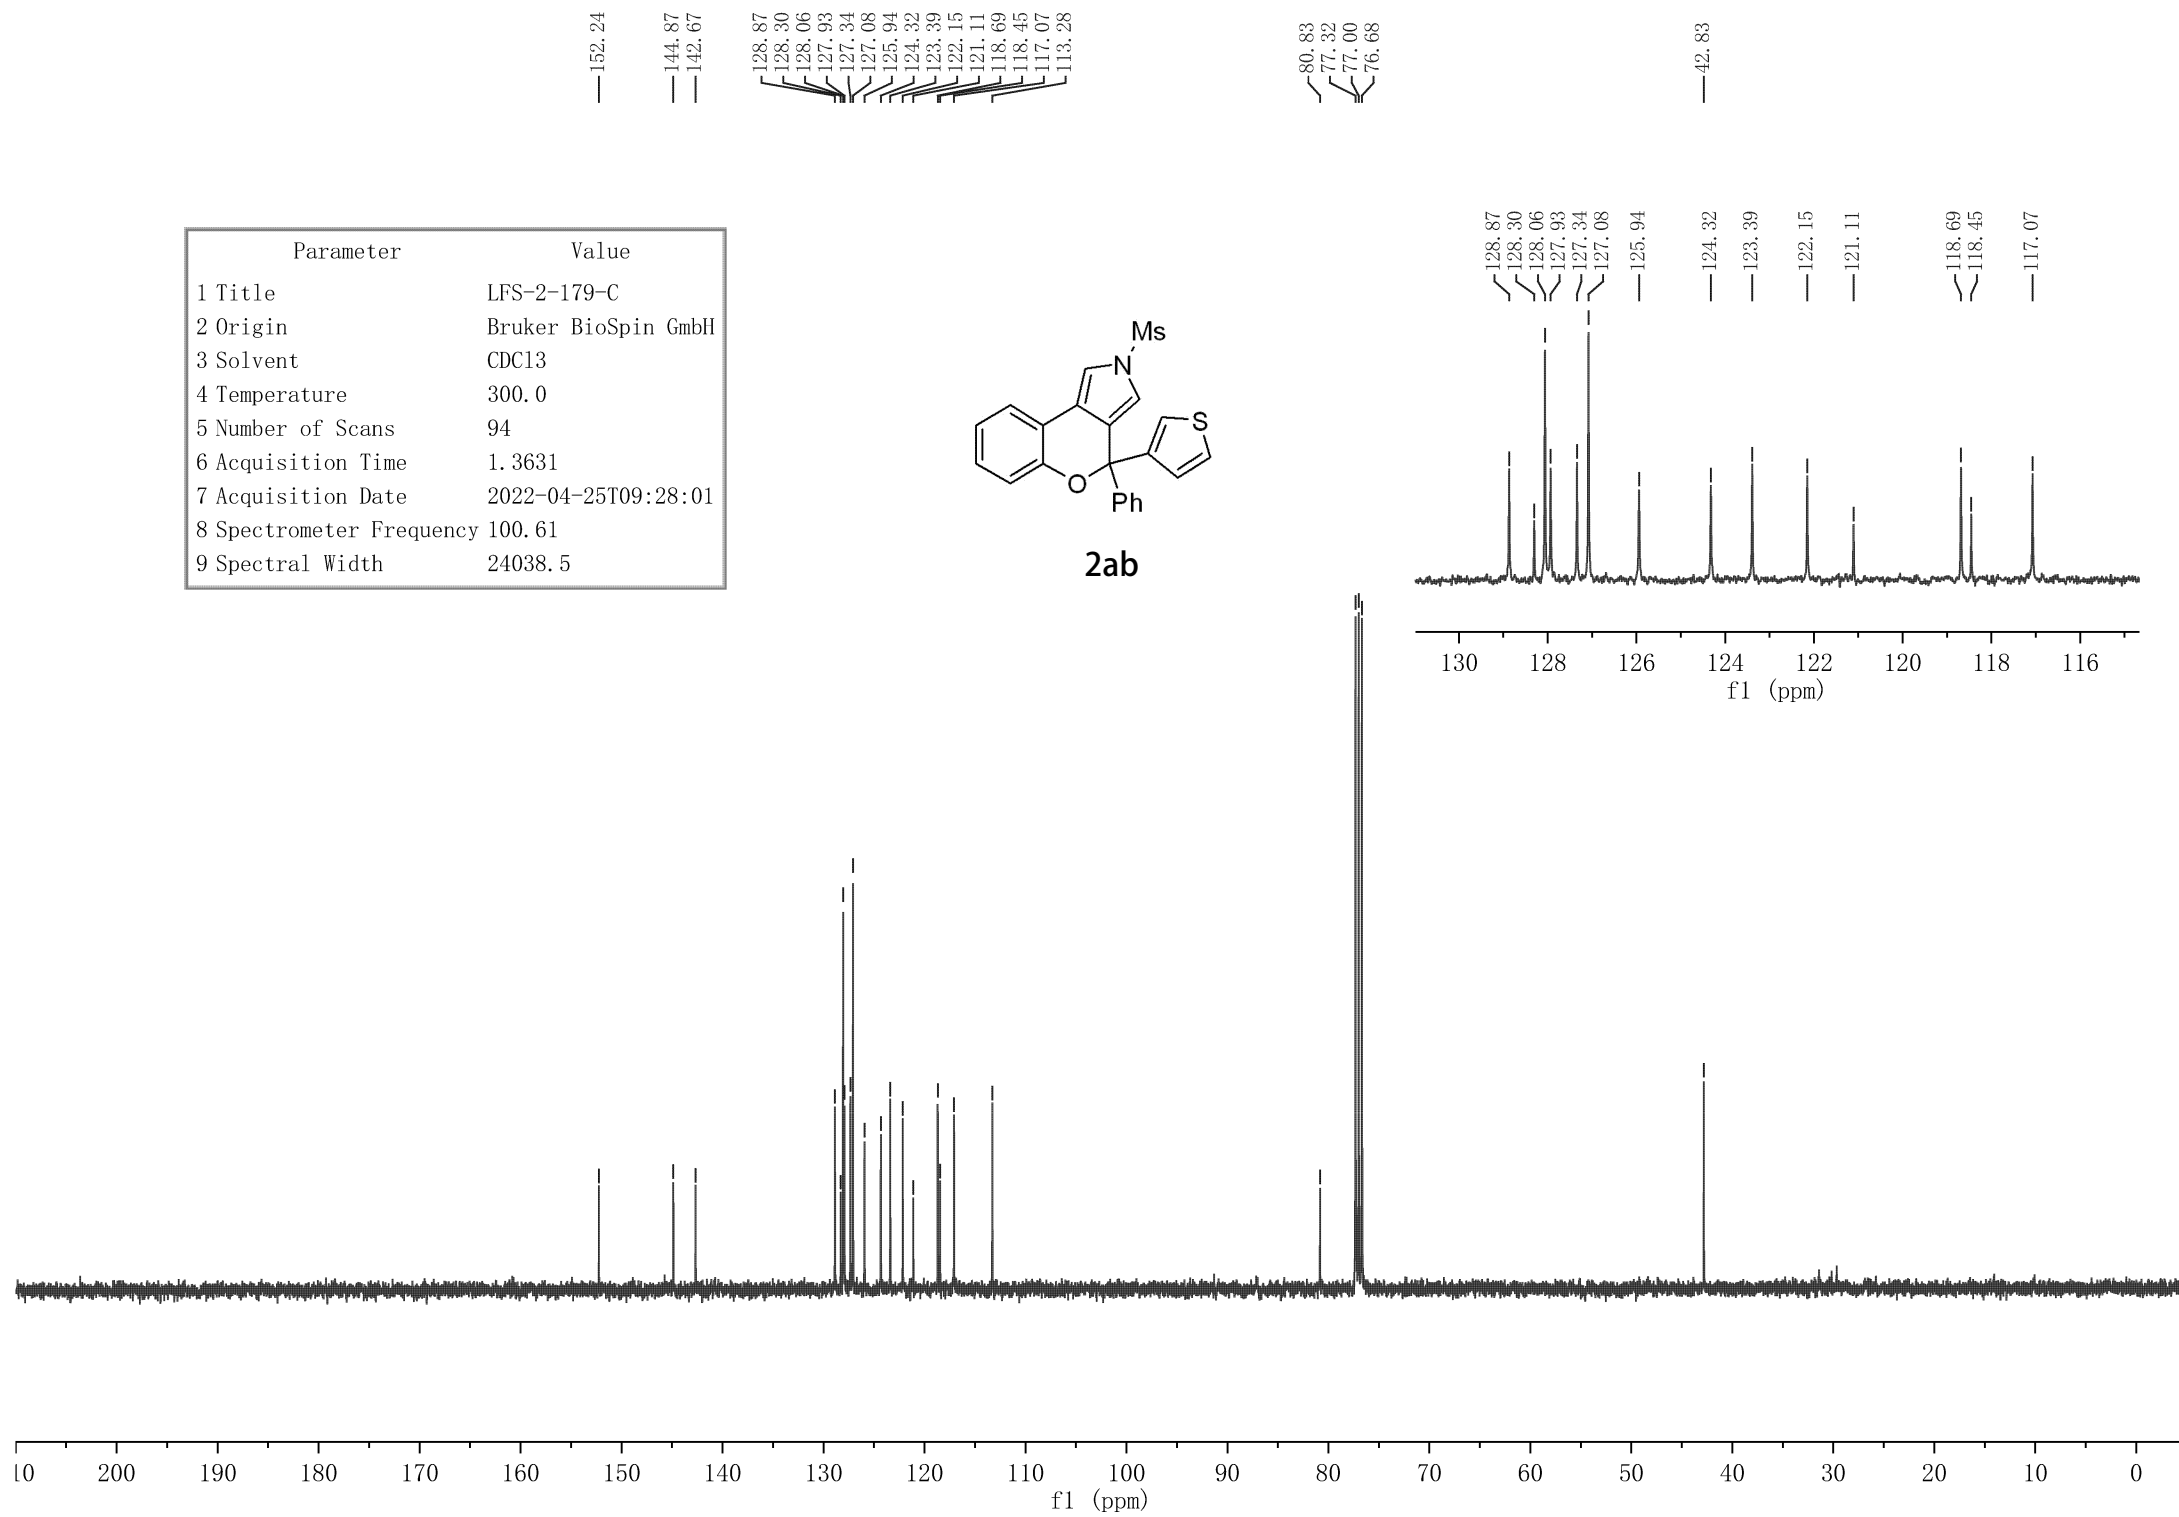

7.359  
7.354  
7.346  
7.235  
7.207  
7.201  
7.185  
7.120  
7.100  
7.088  
7.069  
7.030  
7.010  
6.907  
6.889  
6.871  
6.794  
6.773  
6.695  
6.691

| Parameter                | Value               |
|--------------------------|---------------------|
| 1 Title                  | LFS-2-200-II        |
| 2 Origin                 | Bruker BioSpin GmbH |
| 3 Solvent                | CDC13               |
| 4 Temperature            | 298.0               |
| 5 Number of Scans        | 13                  |
| 6 Acquisition Time       | 4.0894              |
| 7 Acquisition Date       | 2022-04-29T10:14:24 |
| 8 Spectrometer Frequency | 400.13              |
| 9 Spectral Width         | 8012.8              |

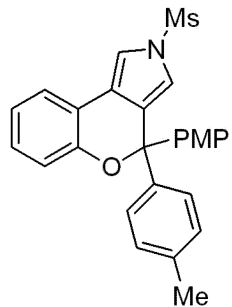

2ac

3.742

3.115

2.296

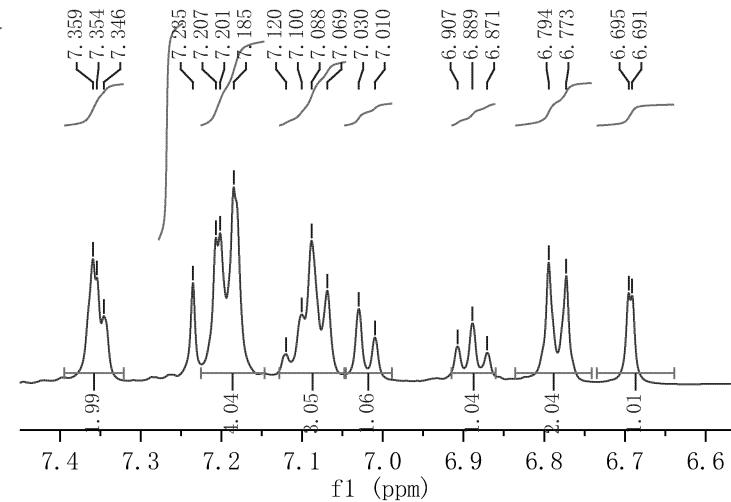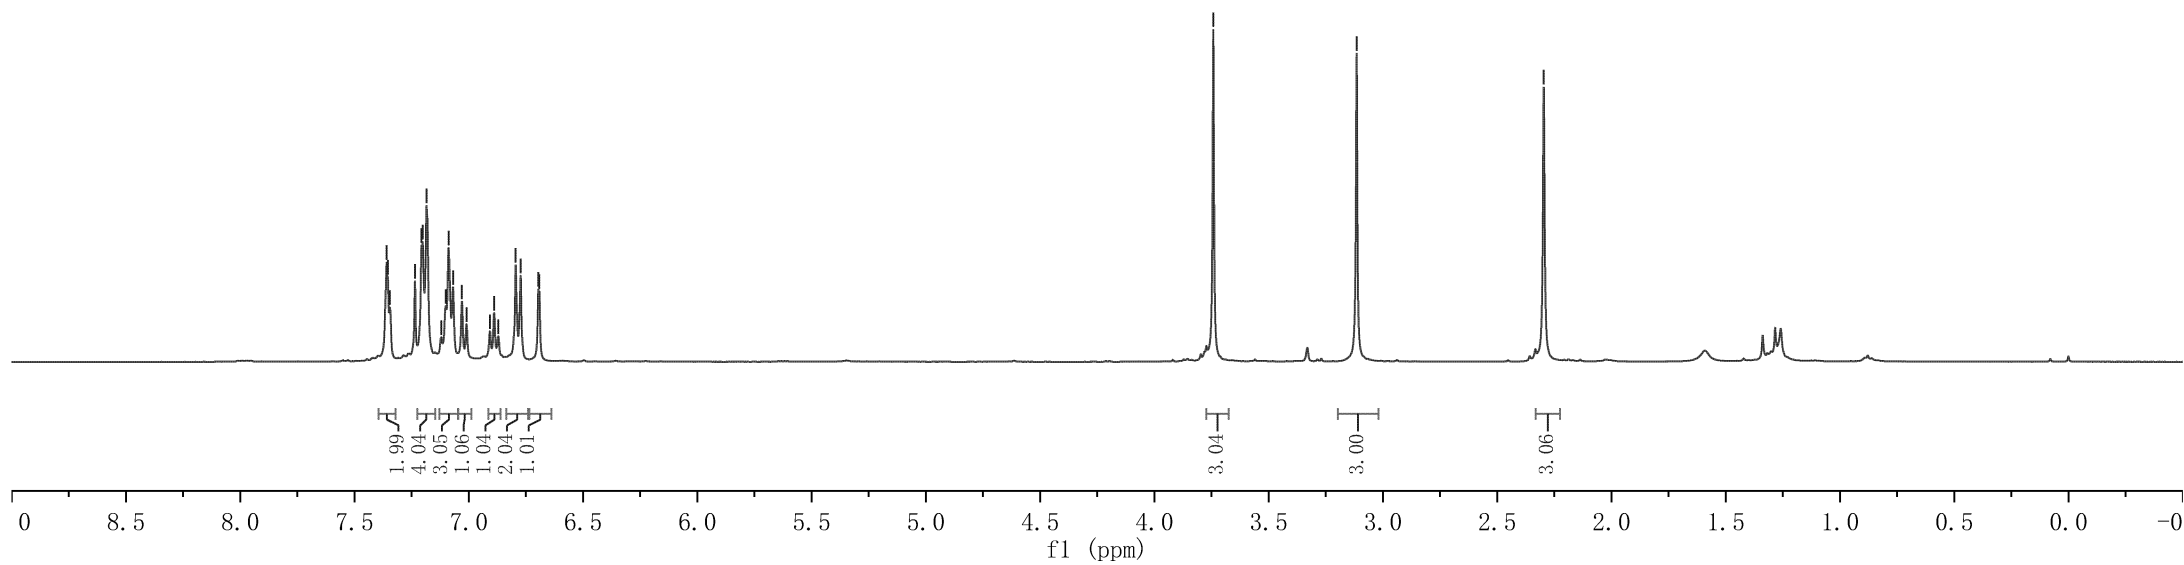

| Parameter                | Value               |
|--------------------------|---------------------|
| 1 Title                  | LFS-2-200-C         |
| 2 Origin                 | Bruker BioSpin GmbH |
| 3 Solvent                | CDC13               |
| 4 Temperature            | 300.0               |
| 5 Number of Scans        | 67                  |
| 6 Acquisition Time       | 1.3631              |
| 7 Acquisition Date       | 2022-04-29T10:16:38 |
| 8 Spectrometer Frequency | 100.61              |
| 9 Spectral Width         | 24038.5             |

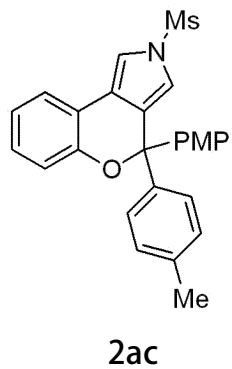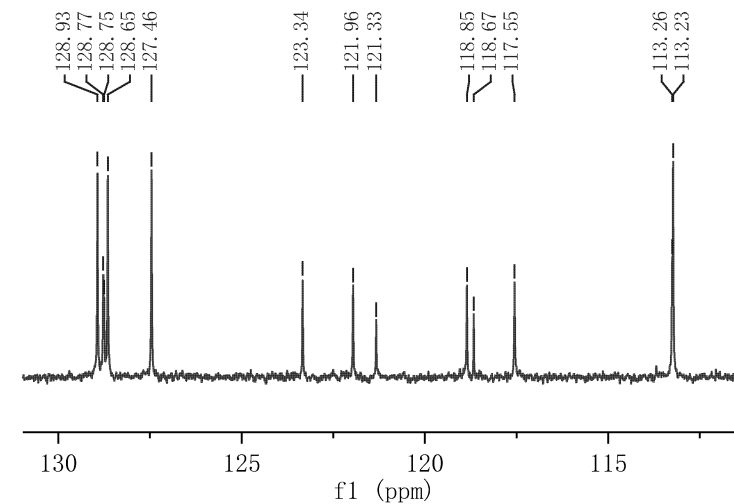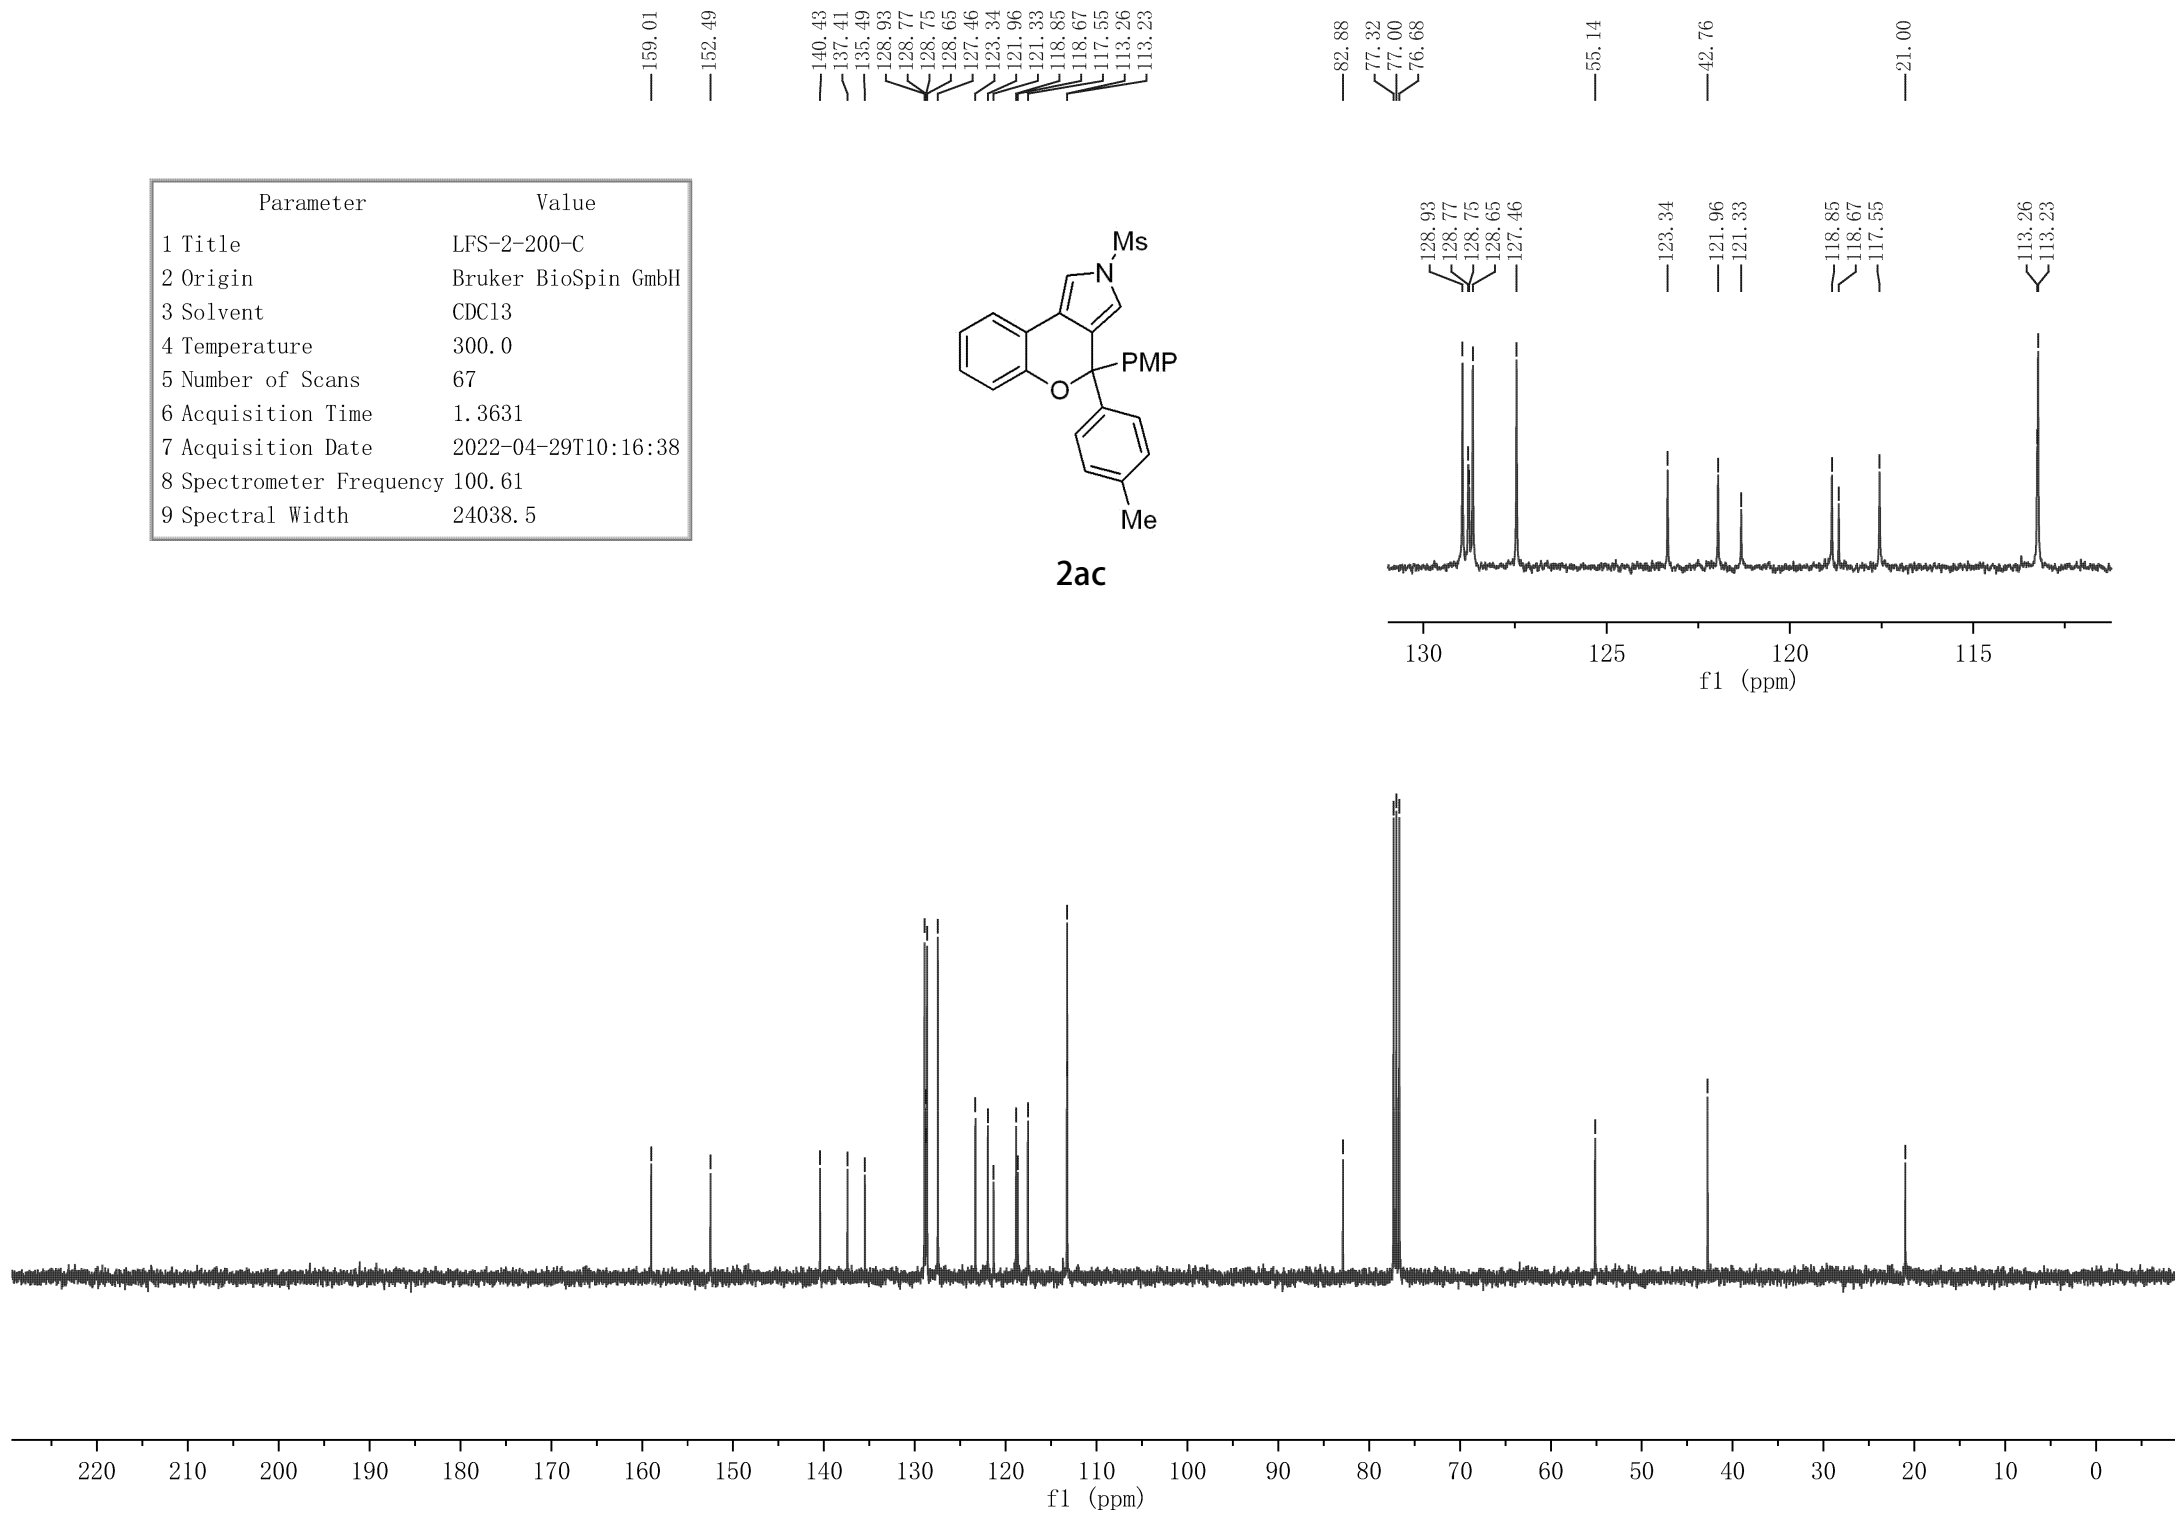

7.373  
7.369  
7.365  
7.360  
7.355  
7.351  
7.249  
7.217  
7.195  
7.133  
7.129  
7.112  
7.094  
7.091  
7.027  
7.009  
6.921  
6.918  
6.902  
6.900  
6.884  
6.881  
6.808  
6.786  
6.684  
6.678

| Parameter                | Value                   |
|--------------------------|-------------------------|
| 1 Title                  | zjj-13-203-PMP-chanwu-H |
| 2 Origin                 | Bruker BioSpin GmbH     |
| 3 Solvent                | CDCl3                   |
| 4 Temperature            | 298.0                   |
| 5 Number of Scans        | 13                      |
| 6 Acquisition Time       | 4.0894                  |
| 7 Acquisition Date       | 2022-02-28T16:50:07     |
| 8 Spectrometer Frequency | 400.13                  |
| 9 Spectral Width         | 8012.8                  |

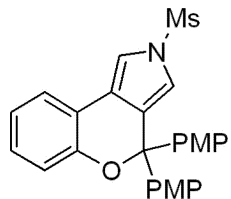

2ad

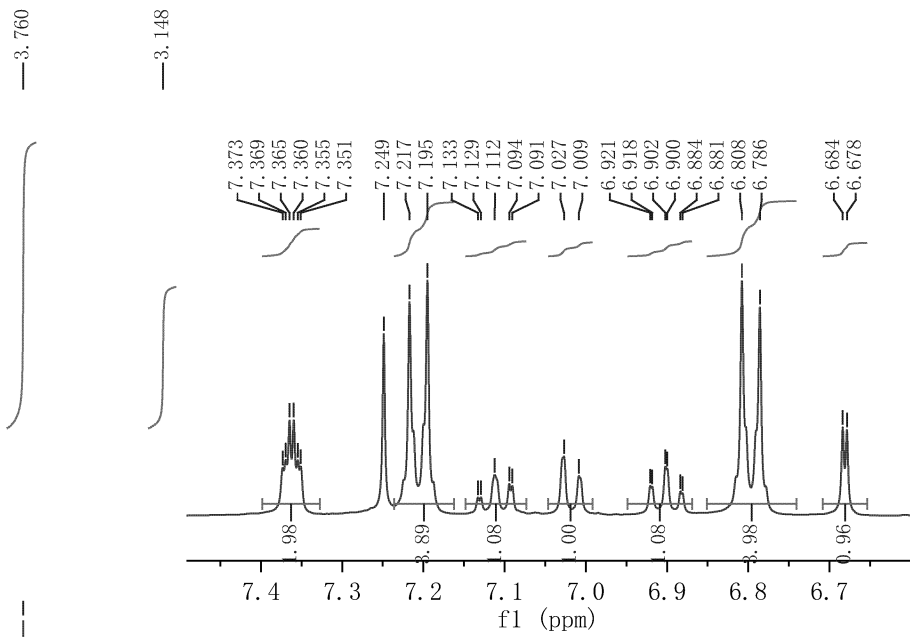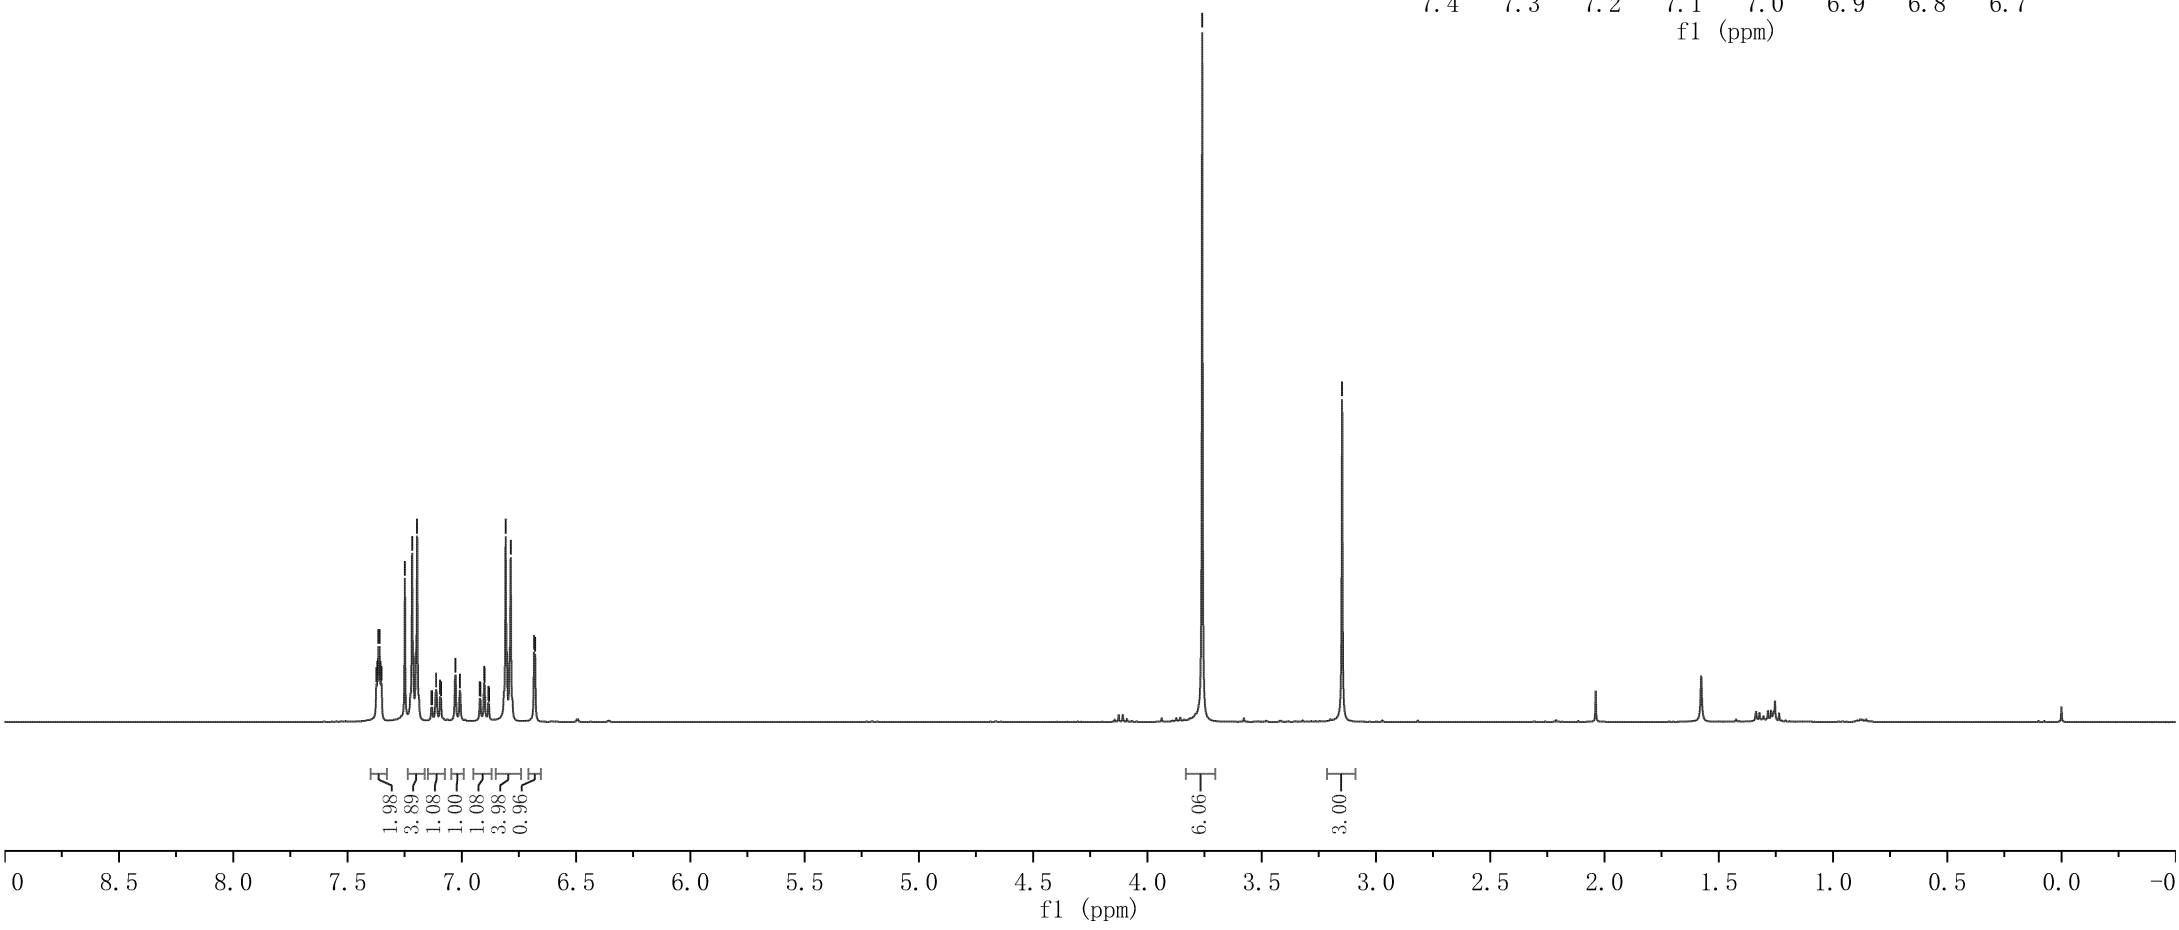

| Parameter                | Value               |
|--------------------------|---------------------|
| 1 Title                  | zjj-13-203-C        |
| 2 Origin                 | Bruker BioSpin GmbH |
| 3 Solvent                | CDC13               |
| 4 Temperature            | 300.0               |
| 5 Number of Scans        | 47                  |
| 6 Acquisition Time       | 1.3631              |
| 7 Acquisition Date       | 2022-02-28T16:52:13 |
| 8 Spectrometer Frequency | 100.61              |
| 9 Spectral Width         | 24038.5             |

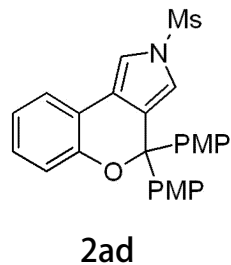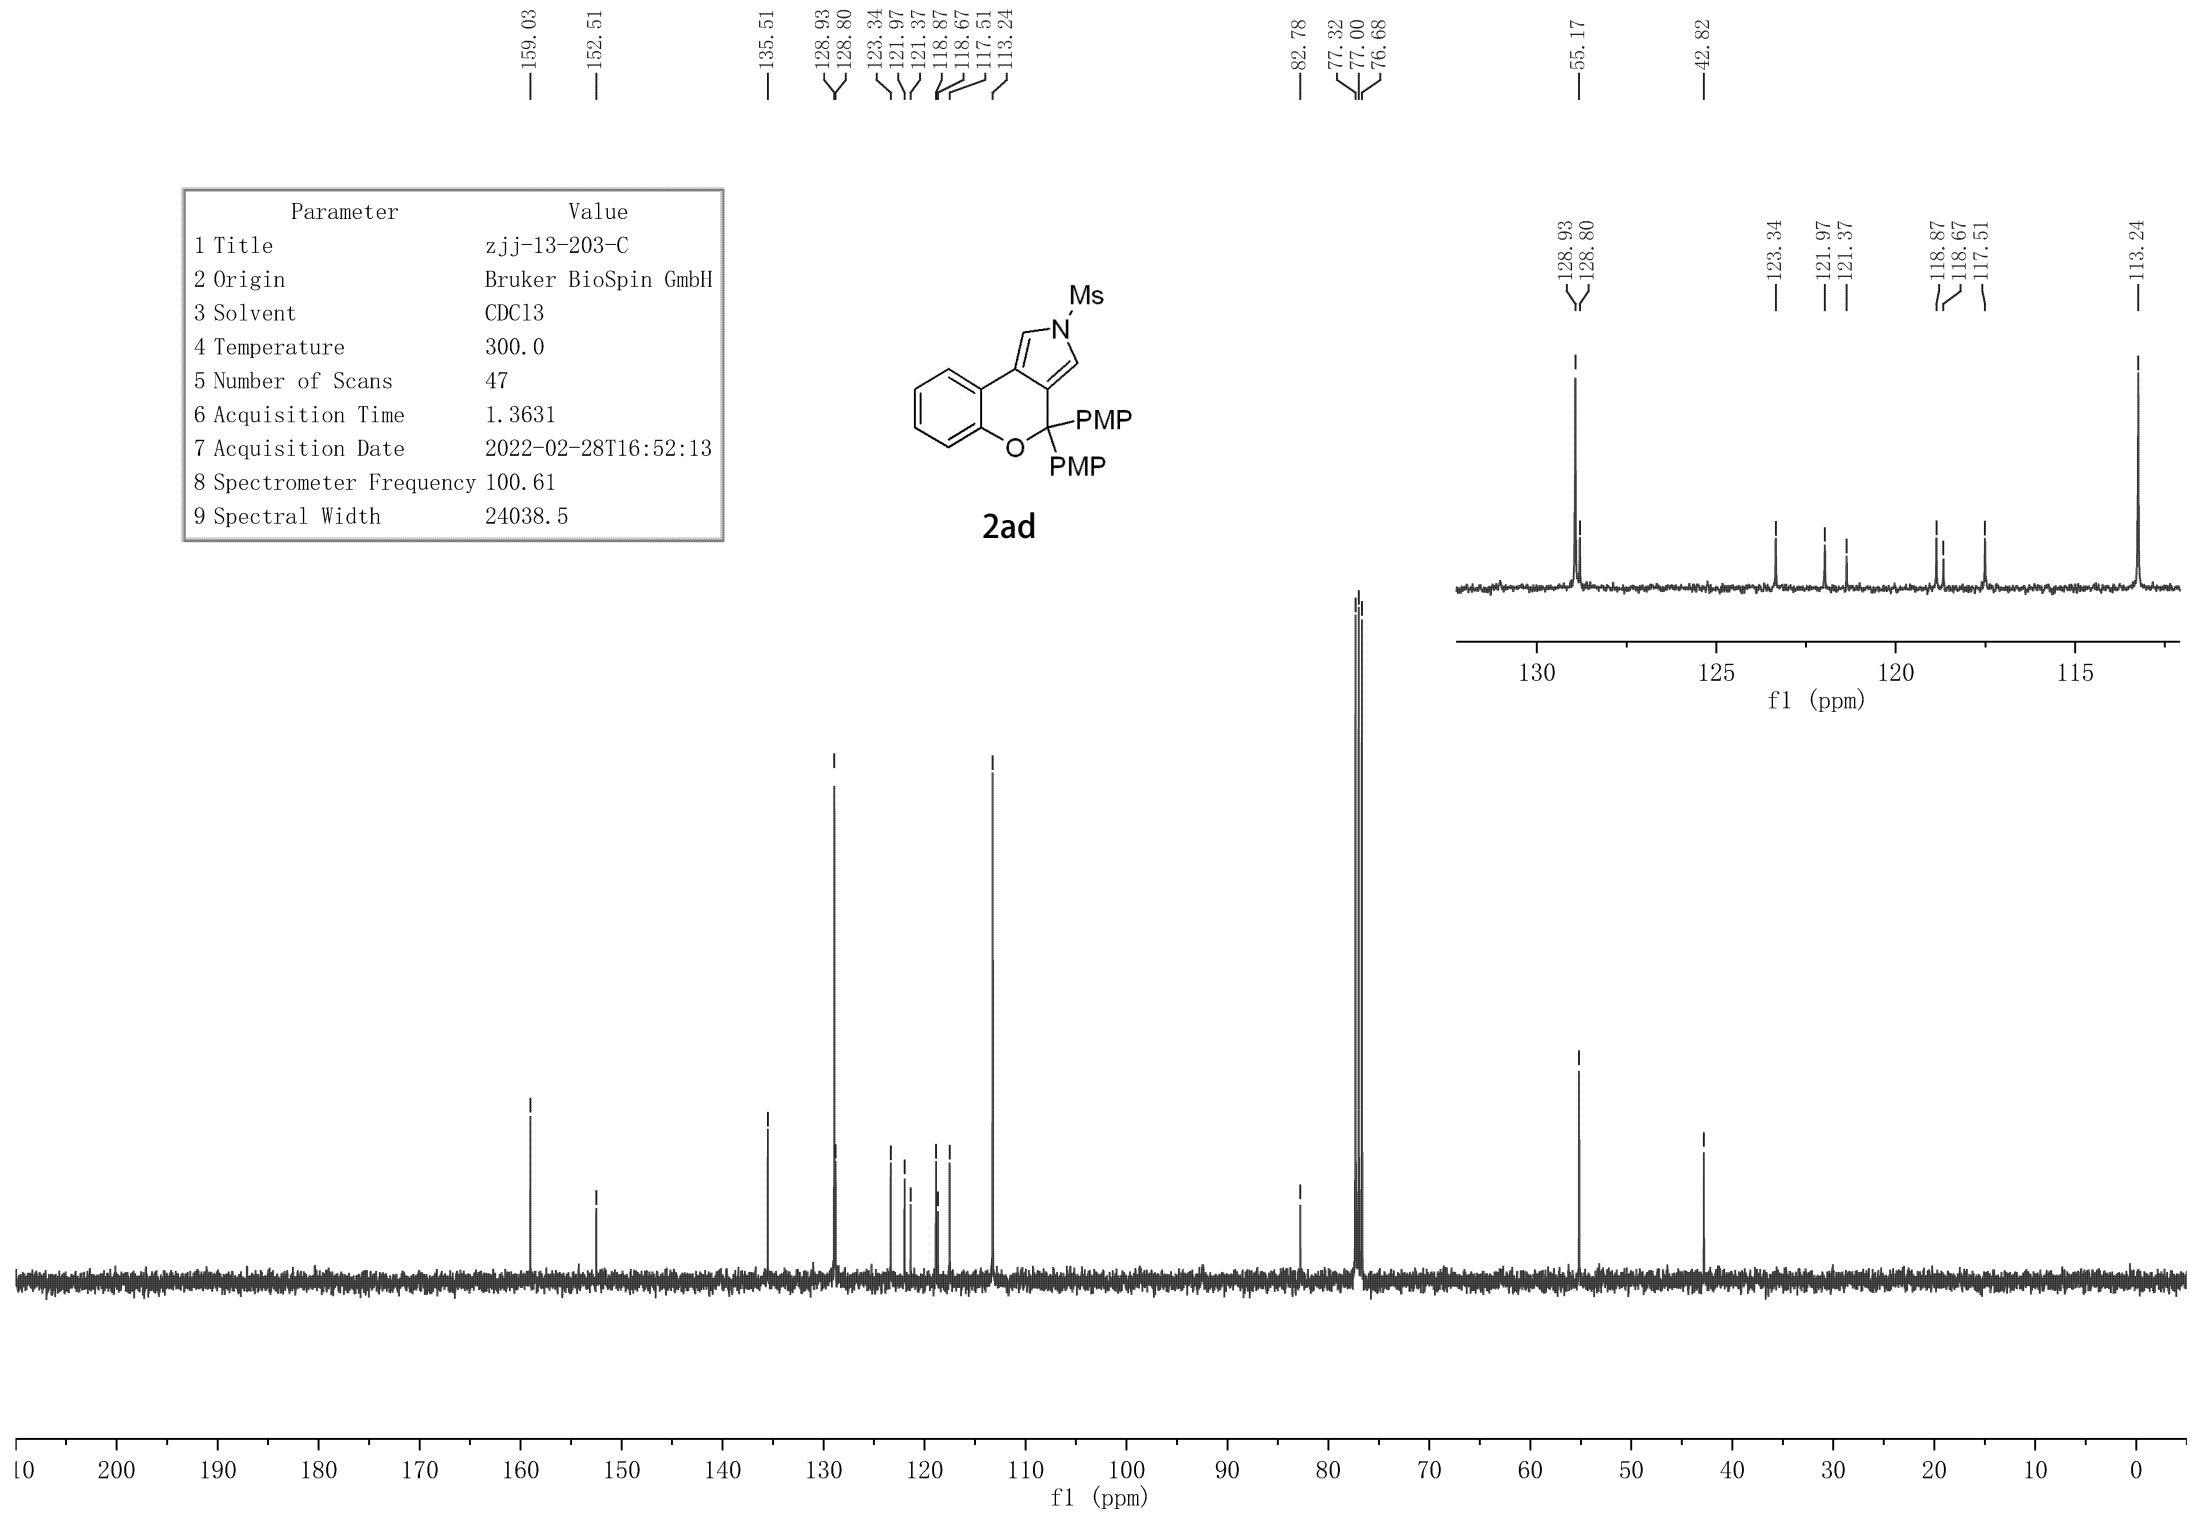

| Parameter                | Value               |
|--------------------------|---------------------|
| 1 Title                  | LFS-2-198-H         |
| 2 Origin                 |                     |
| 3 Solvent                | CDCl3               |
| 4 Temperature            | 299.3               |
| 5 Number of Scans        | 32                  |
| 6 Acquisition Time       | 4.0002              |
| 7 Acquisition Date       | 2022-04-29T17:19:31 |
| 8 Spectrometer Frequency | 399.92              |
| 9 Spectral Width         | 8012.0              |

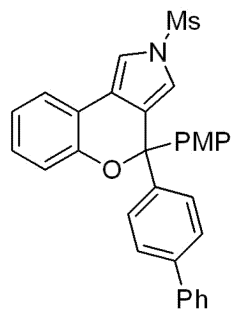

2ae

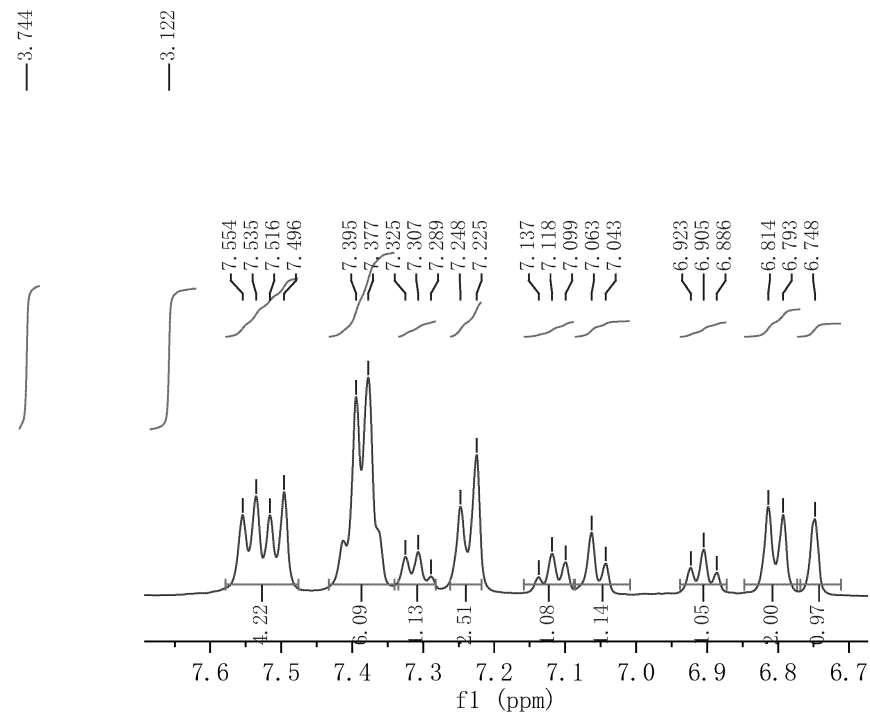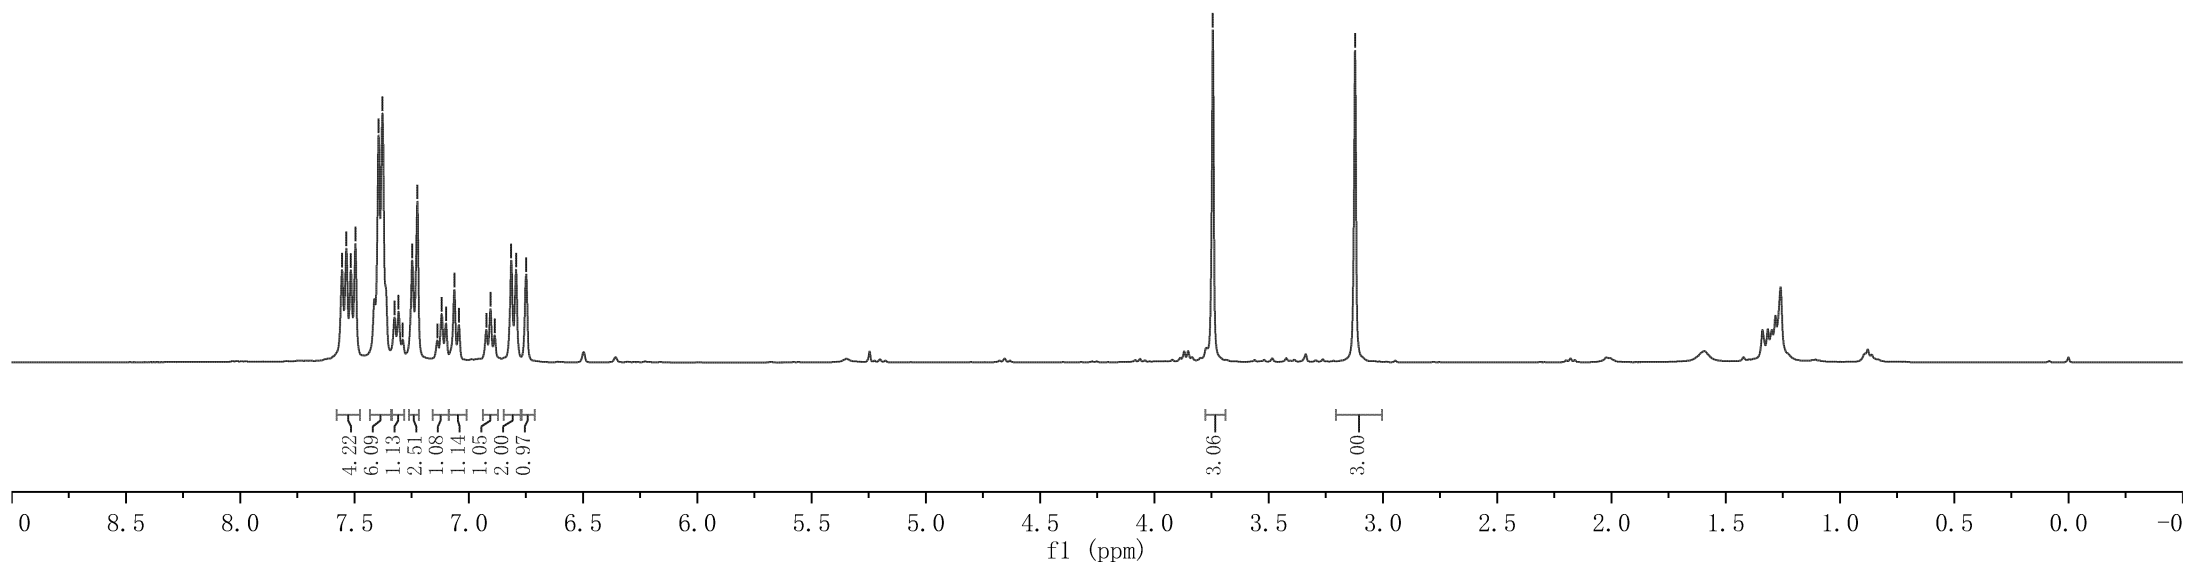

| Parameter                | Value               |
|--------------------------|---------------------|
| 1 Title                  | LFS-2-198-C-4-Ph-Ph |
| 2 Origin                 |                     |
| 3 Solvent                | CDC13               |
| 4 Temperature            | 299.2               |
| 5 Number of Scans        | 200                 |
| 6 Acquisition Time       | 1.0000              |
| 7 Acquisition Date       | 2022-04-29T17:28:39 |
| 8 Spectrometer Frequency | 100.56              |
| 9 Spectral Width         | 26041.0             |

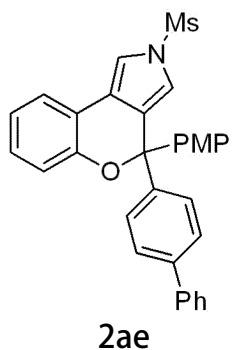

— 159.10  
— 152.39  
— 142.41  
— 140.45  
— 135.21  
— 128.97  
— 128.83  
— 128.71  
— 128.46  
— 127.92  
— 127.34  
— 127.01  
— 126.67  
— 123.38  
— 122.07  
— 121.25  
— 118.87  
— 118.64  
— 117.59  
— 113.34  
— 113.31  
— 82.84  
— 77.32  
— 77.00  
— 76.68  
— 55.14  
— 42.78

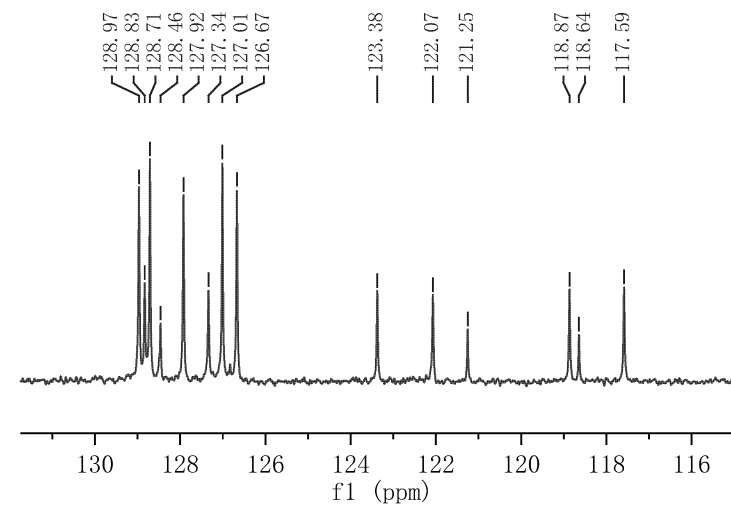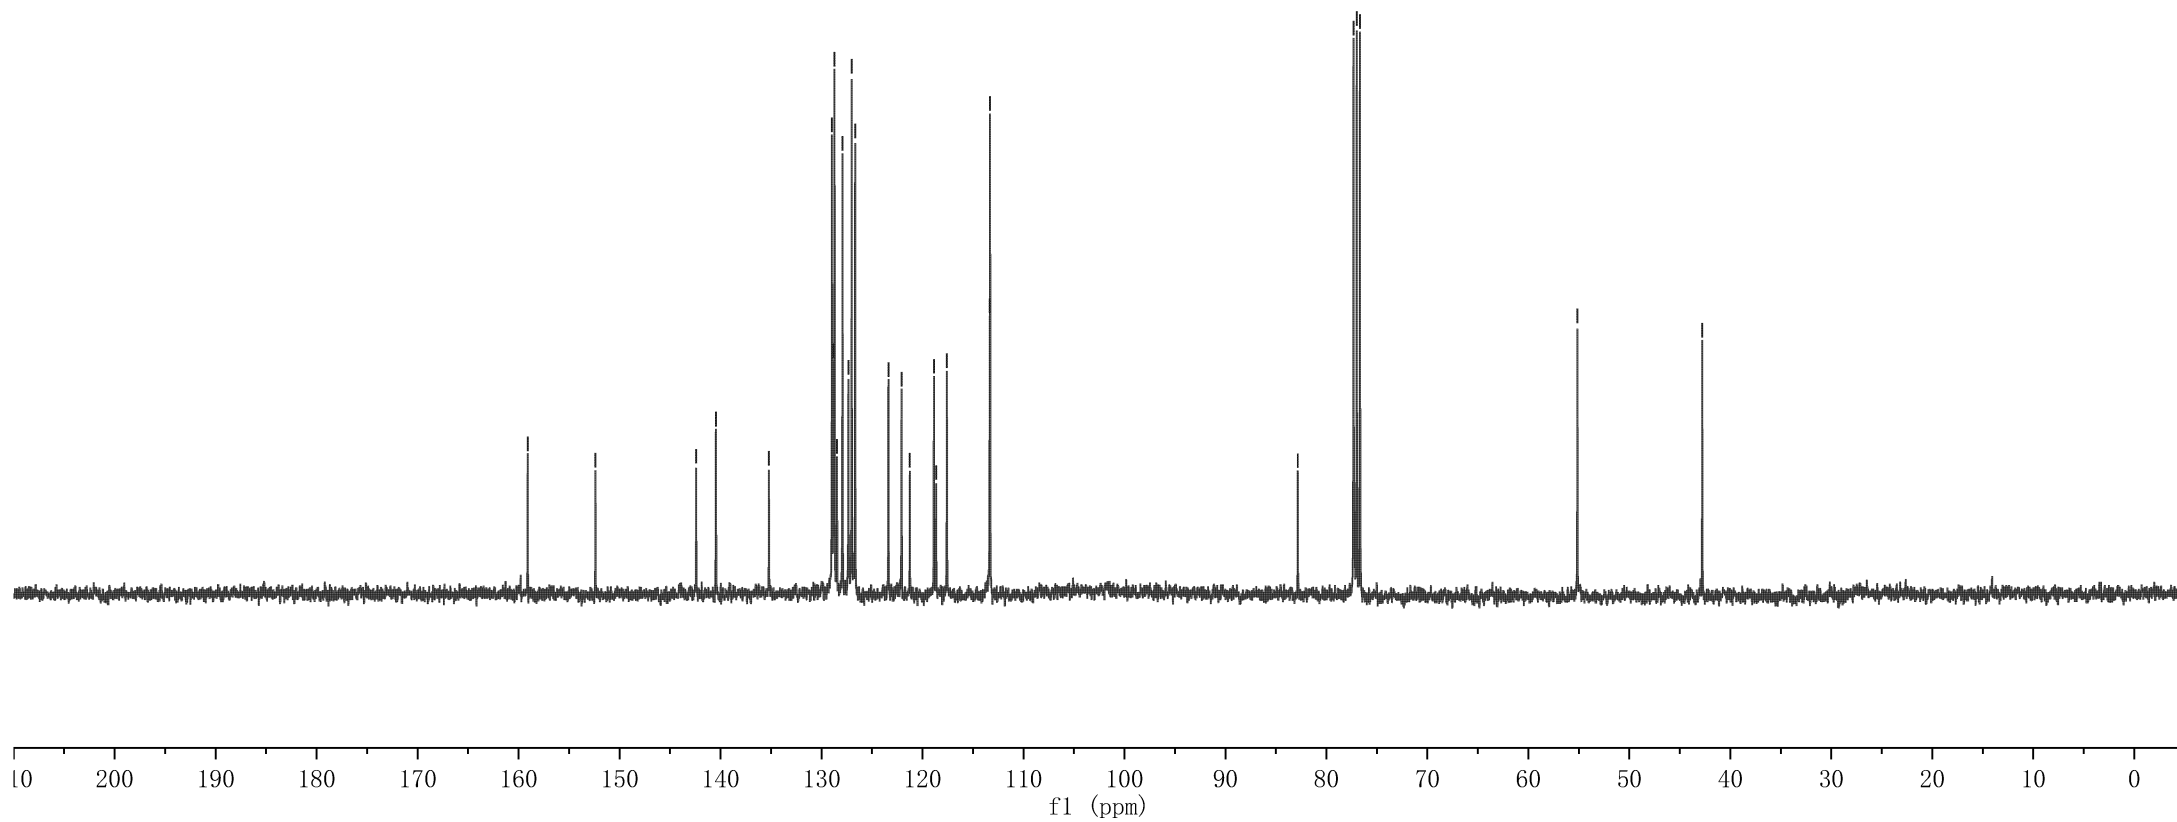



7.377  
7.358  
7.252  
7.186  
7.165  
7.140  
7.121  
7.102  
7.023  
7.003  
6.938  
6.920  
6.901  
6.811  
6.789  
6.681

| Parameter                | Value               |
|--------------------------|---------------------|
| 1 Title                  | ZJJ-14-0Ph-4-Cl     |
| 2 Origin                 |                     |
| 3 Solvent                | CDC13               |
| 4 Temperature            | 299.5               |
| 5 Number of Scans        | 16                  |
| 6 Acquisition Time       | 4.0002              |
| 7 Acquisition Date       | 2022-07-22T17:37:47 |
| 8 Spectrometer Frequency | 399.92              |
| 9 Spectral Width         | 8012.0              |

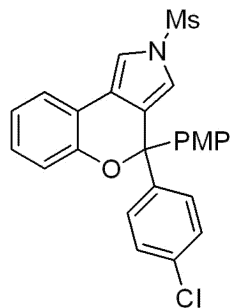

2af

3.762

3.165

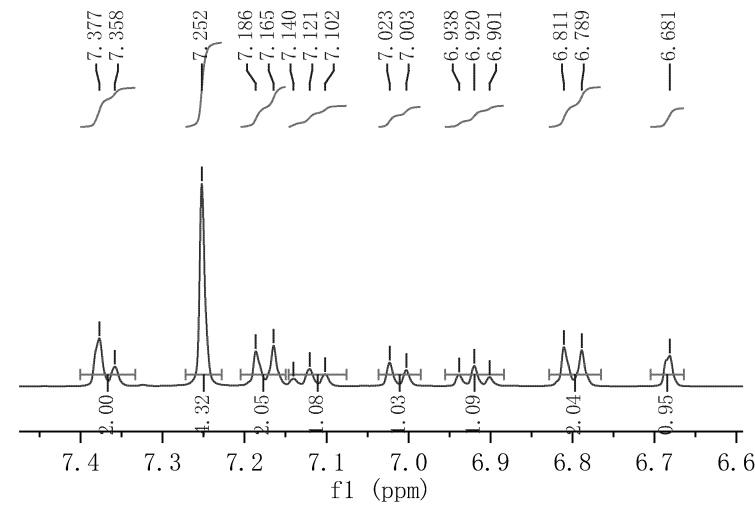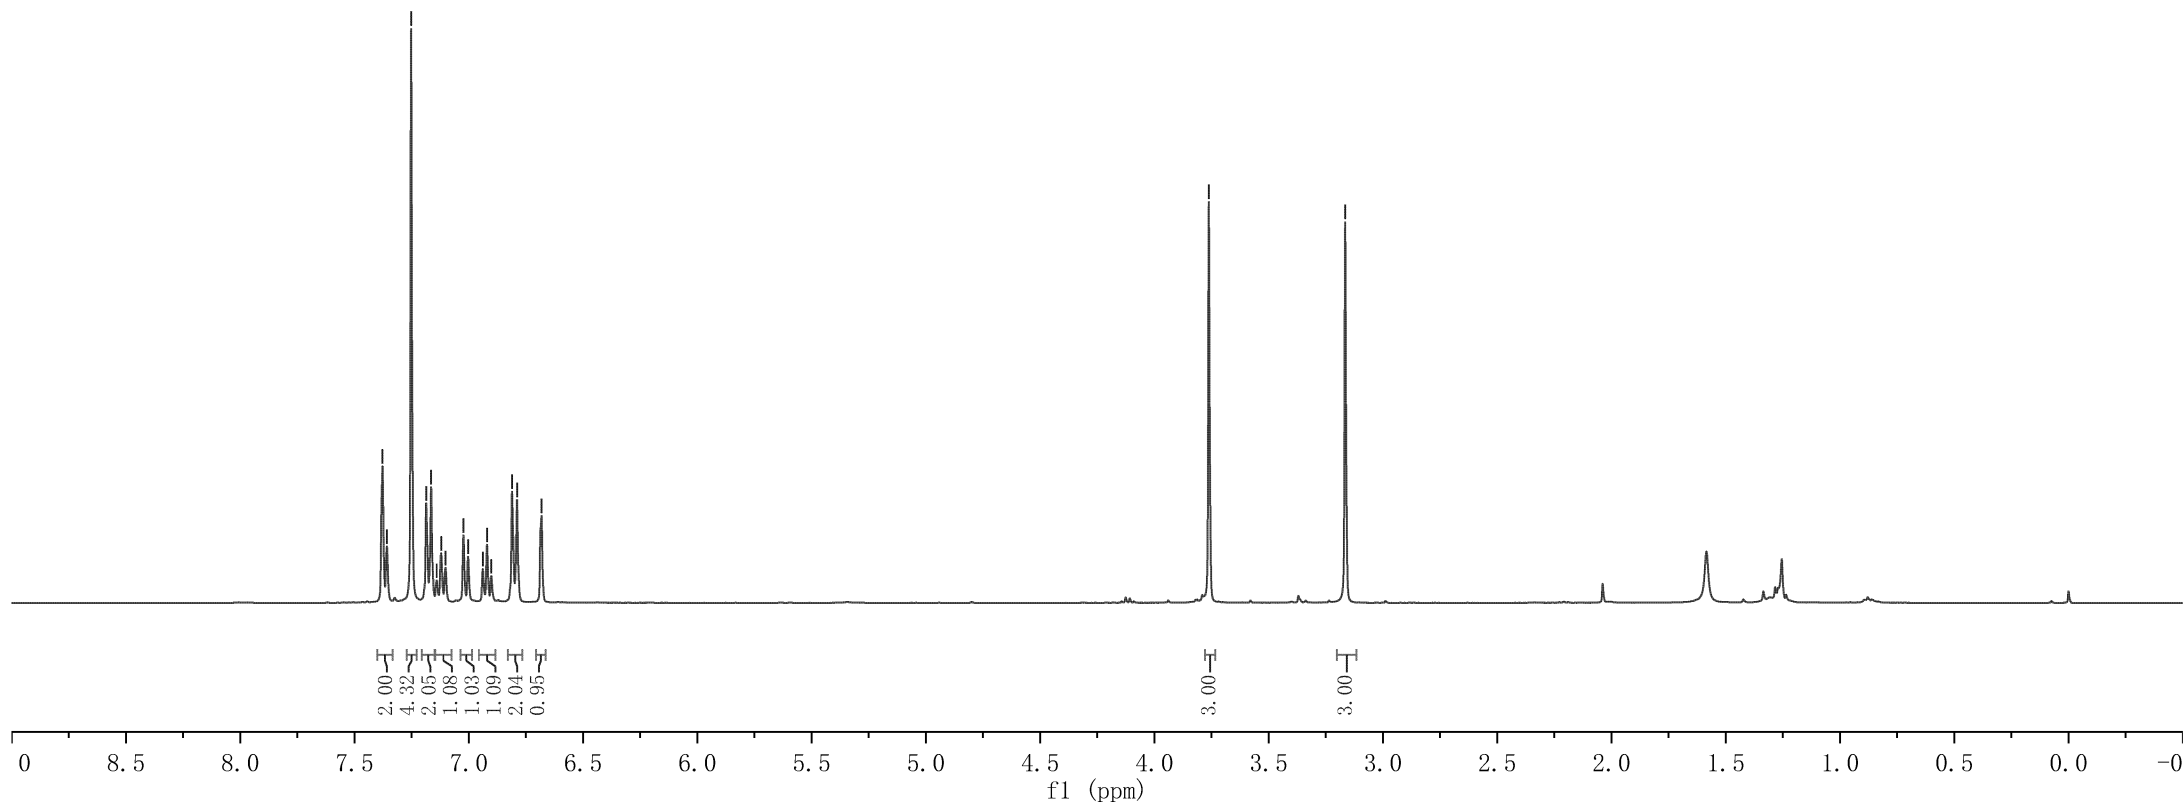

| Parameter                | Value               |
|--------------------------|---------------------|
| 1 Title                  | ZJJ-14-0Ph-4-Cl-C   |
| 2 Origin                 |                     |
| 3 Solvent                | CDC13               |
| 4 Temperature            | 299.5               |
| 5 Number of Scans        | 200                 |
| 6 Acquisition Time       | 1.0000              |
| 7 Acquisition Date       | 2022-07-22T17:47:12 |
| 8 Spectrometer Frequency | 100.56              |
| 9 Spectral Width         | 26041.0             |

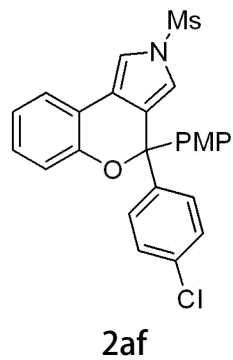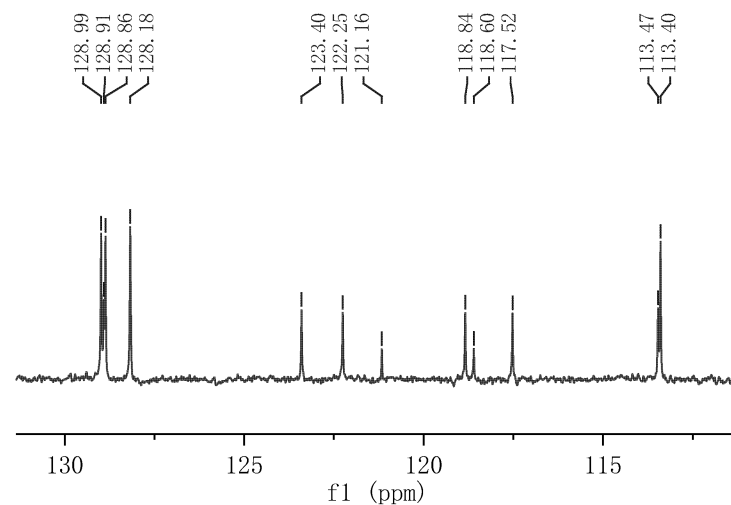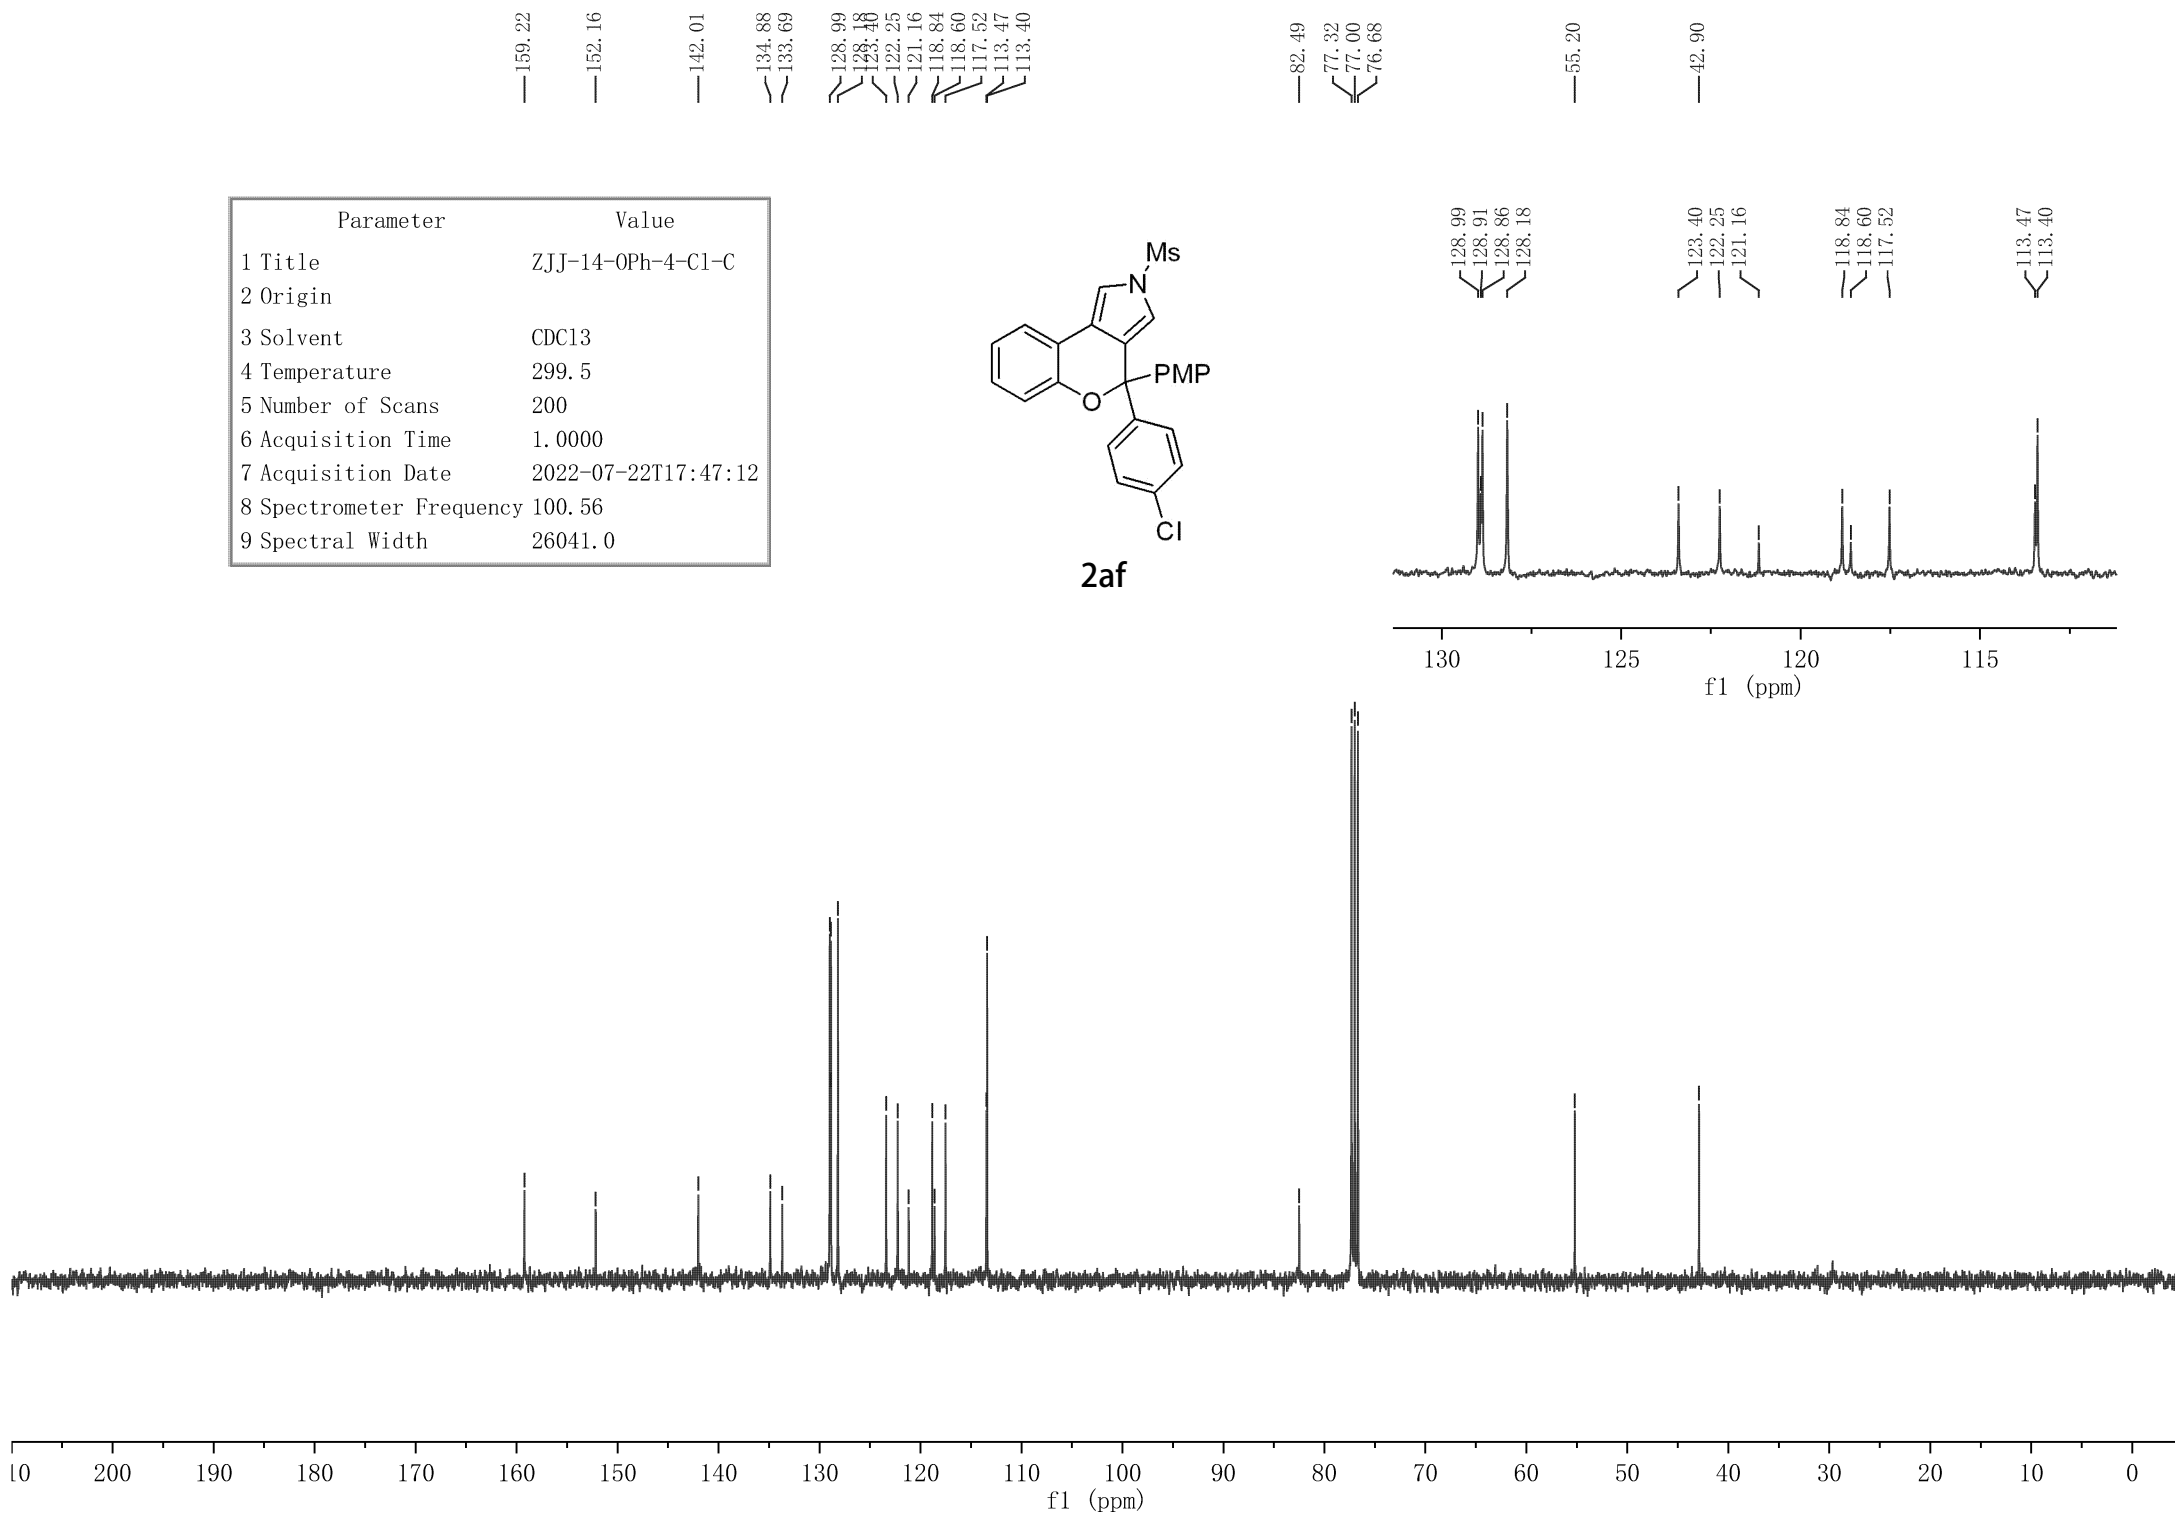

7.463  
7.460  
7.390  
7.386  
7.367  
7.363  
7.346  
7.298  
7.294  
7.289  
7.277  
7.258  
7.243  
7.238  
7.227  
7.221  
7.092  
7.089  
7.072  
7.054  
7.051  
7.021  
7.021  
7.003  
6.898  
6.895  
6.879  
6.877  
6.861  
6.858  
6.798  
6.776

| Parameter                | Value               |
|--------------------------|---------------------|
| 1 Title                  | zjj-14-88-H         |
| 2 Origin                 | Bruker BioSpin GmbH |
| 3 Solvent                | CDC13               |
| 4 Temperature            | 298.0               |
| 5 Number of Scans        | 11                  |
| 6 Acquisition Time       | 4.0894              |
| 7 Acquisition Date       | 2022-05-21T11:38:13 |
| 8 Spectrometer Frequency | 400.13              |
| 9 Spectral Width         | 8012.8              |

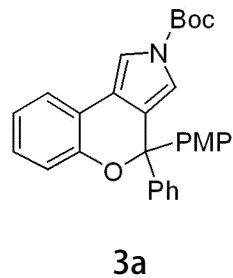

3.747

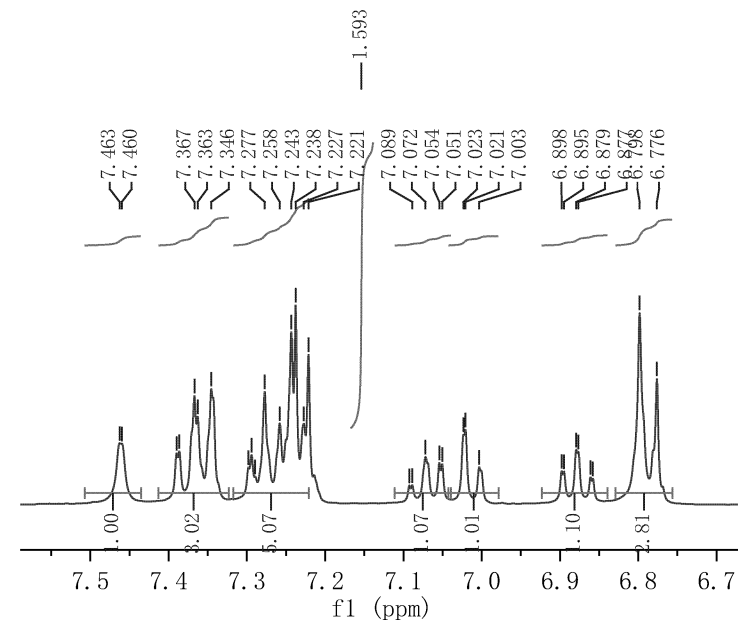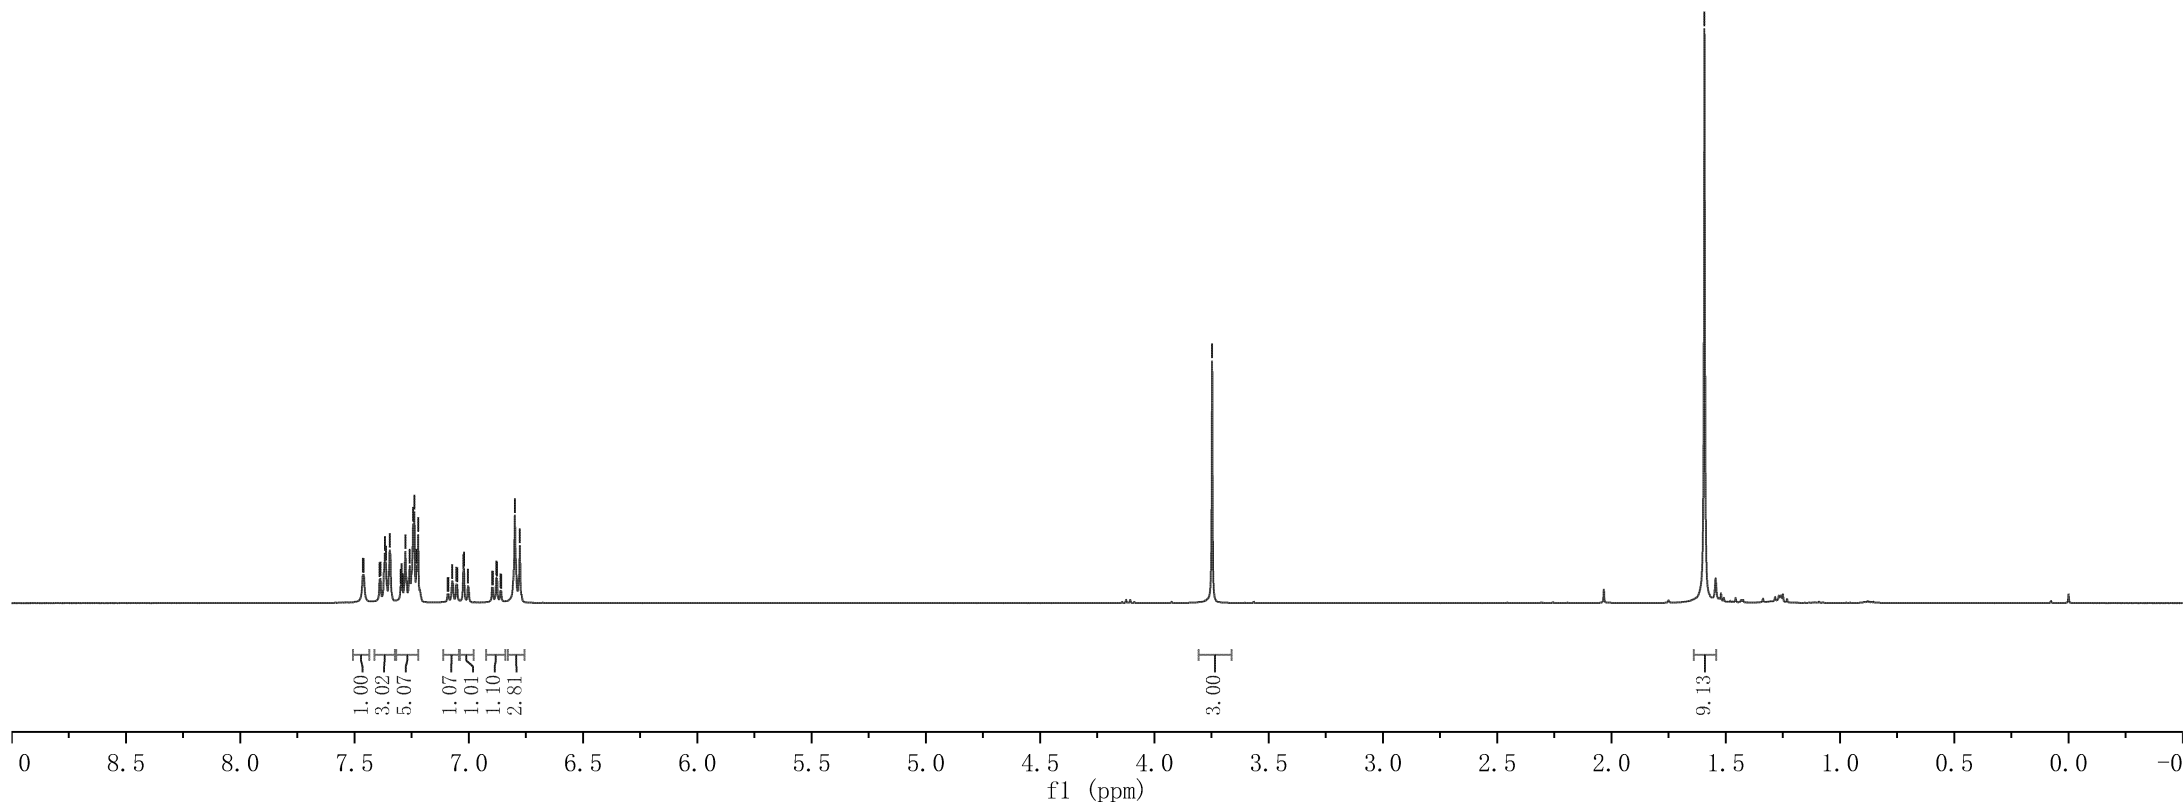

| Parameter                | Value               |
|--------------------------|---------------------|
| 1 Title                  | ZJJ-14-88-1         |
| 2 Origin                 |                     |
| 3 Solvent                | CDC13               |
| 4 Temperature            | 299.4               |
| 5 Number of Scans        | 600                 |
| 6 Acquisition Time       | 1.0000              |
| 7 Acquisition Date       | 2022-05-23T11:04:33 |
| 8 Spectrometer Frequency | 100.56              |
| 9 Spectral Width         | 26041.0             |

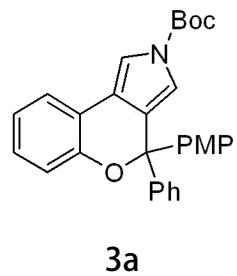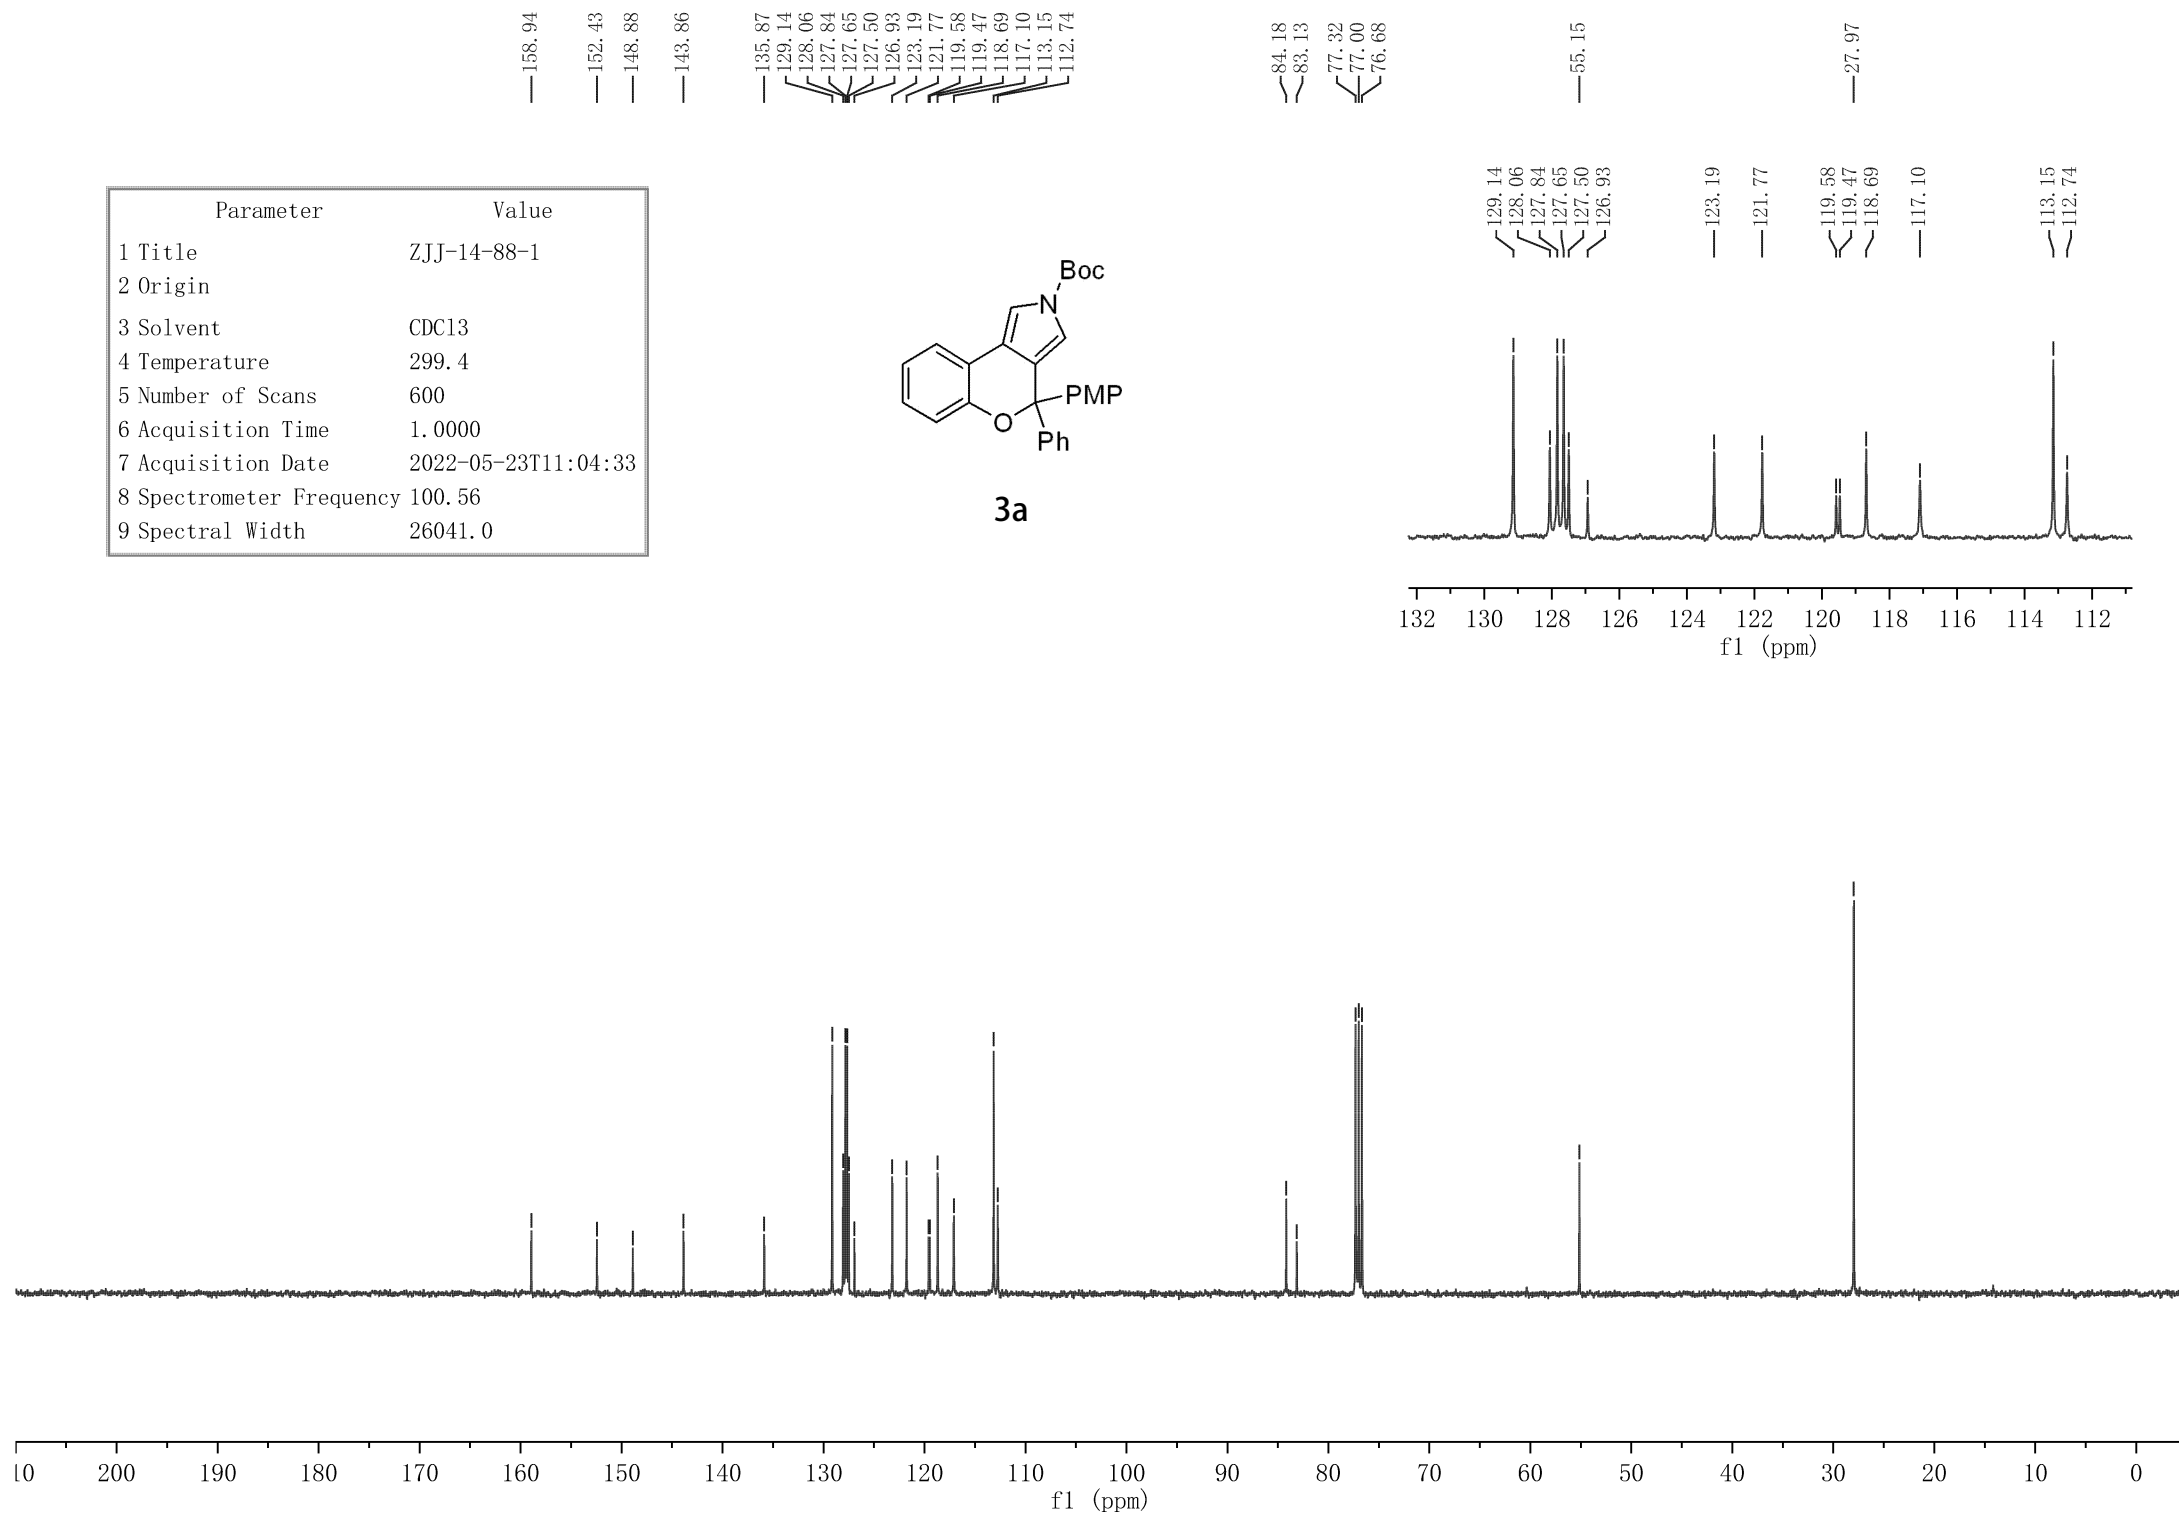



| Parameter                | Value               |
|--------------------------|---------------------|
| 1 Title                  | zjj-14-158-C        |
| 2 Origin                 | Bruker BioSpin GmbH |
| 3 Solvent                | CDC13               |
| 4 Temperature            | 300.0               |
| 5 Number of Scans        | 114                 |
| 6 Acquisition Time       | 1.3631              |
| 7 Acquisition Date       | 2022-07-30T13:58:02 |
| 8 Spectrometer Frequency | 100.61              |
| 9 Spectral Width         | 24038.5             |

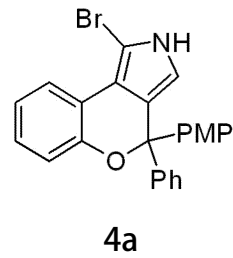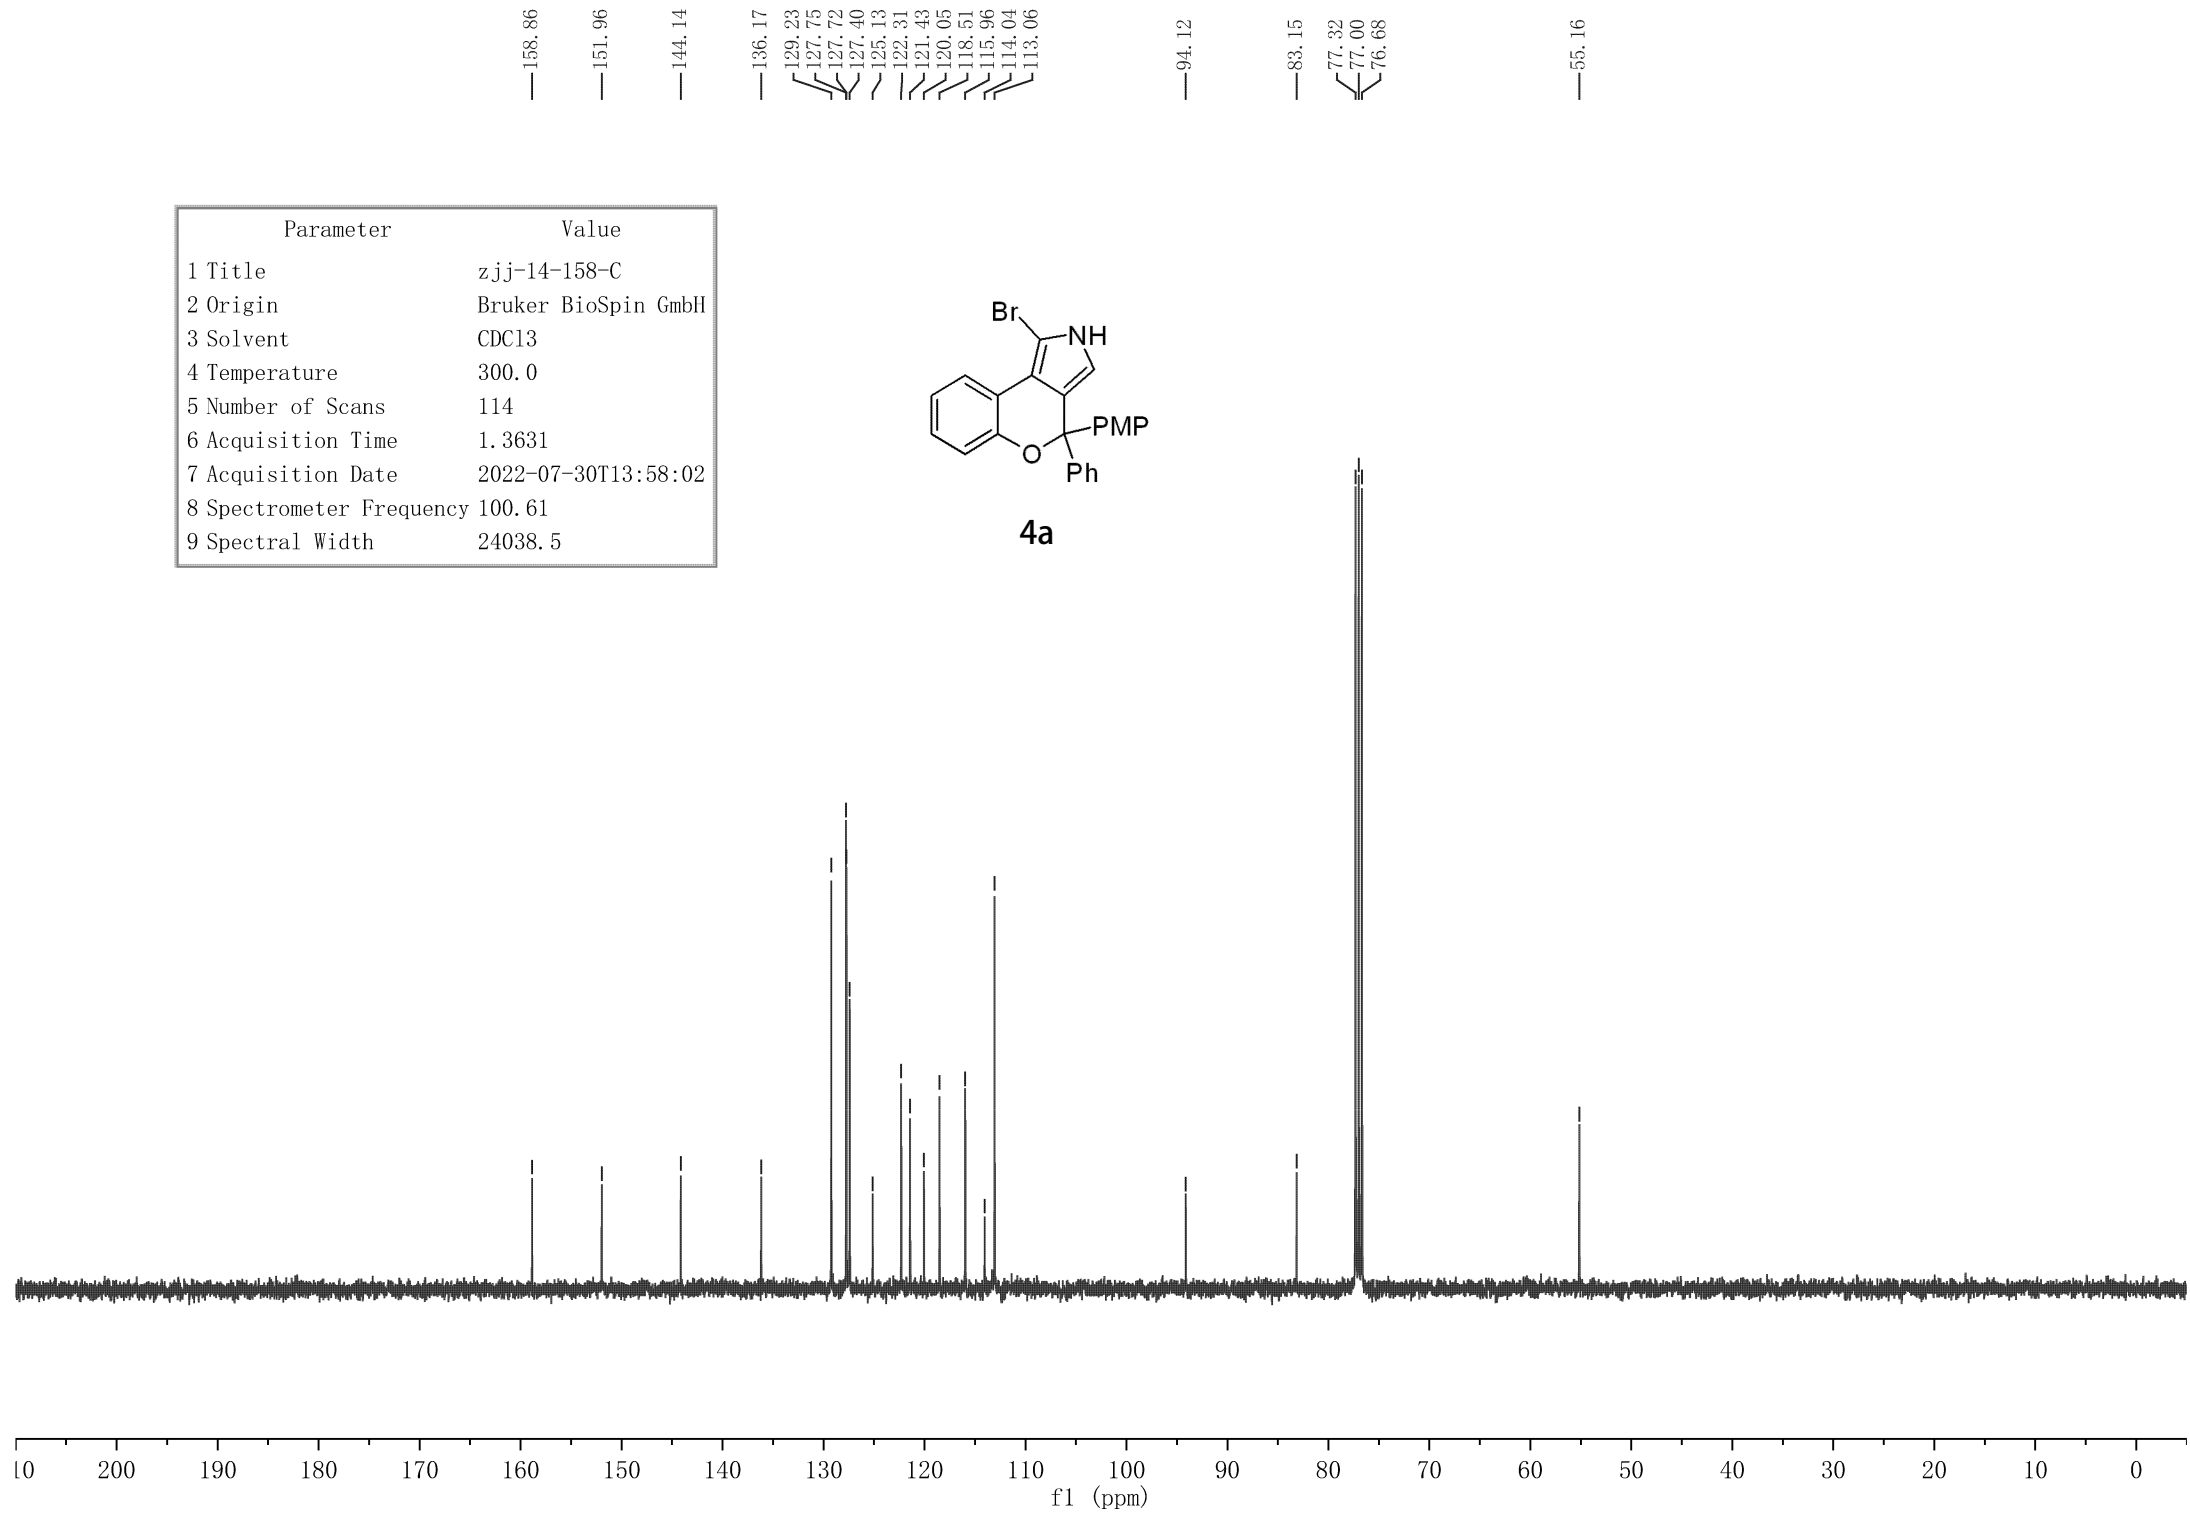

129.23  
127.76  
127.73  
127.40  
122.31  
121.43  
118.51  
115.96  
113.06

55.16

| Parameter                | Value               |
|--------------------------|---------------------|
| 1 Title                  | zjj-14-158-C-dept   |
| 2 Origin                 | Bruker BioSpin GmbH |
| 3 Solvent                | CDC13               |
| 4 Temperature            | 300.0               |
| 5 Number of Scans        | 52                  |
| 6 Acquisition Time       | 1.3631              |
| 7 Acquisition Date       | 2022-07-30T14:05:18 |
| 8 Spectrometer Frequency | 100.61              |
| 9 Spectral Width         | 24038.5             |

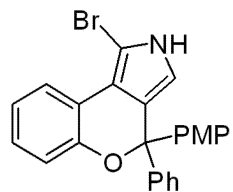

4a

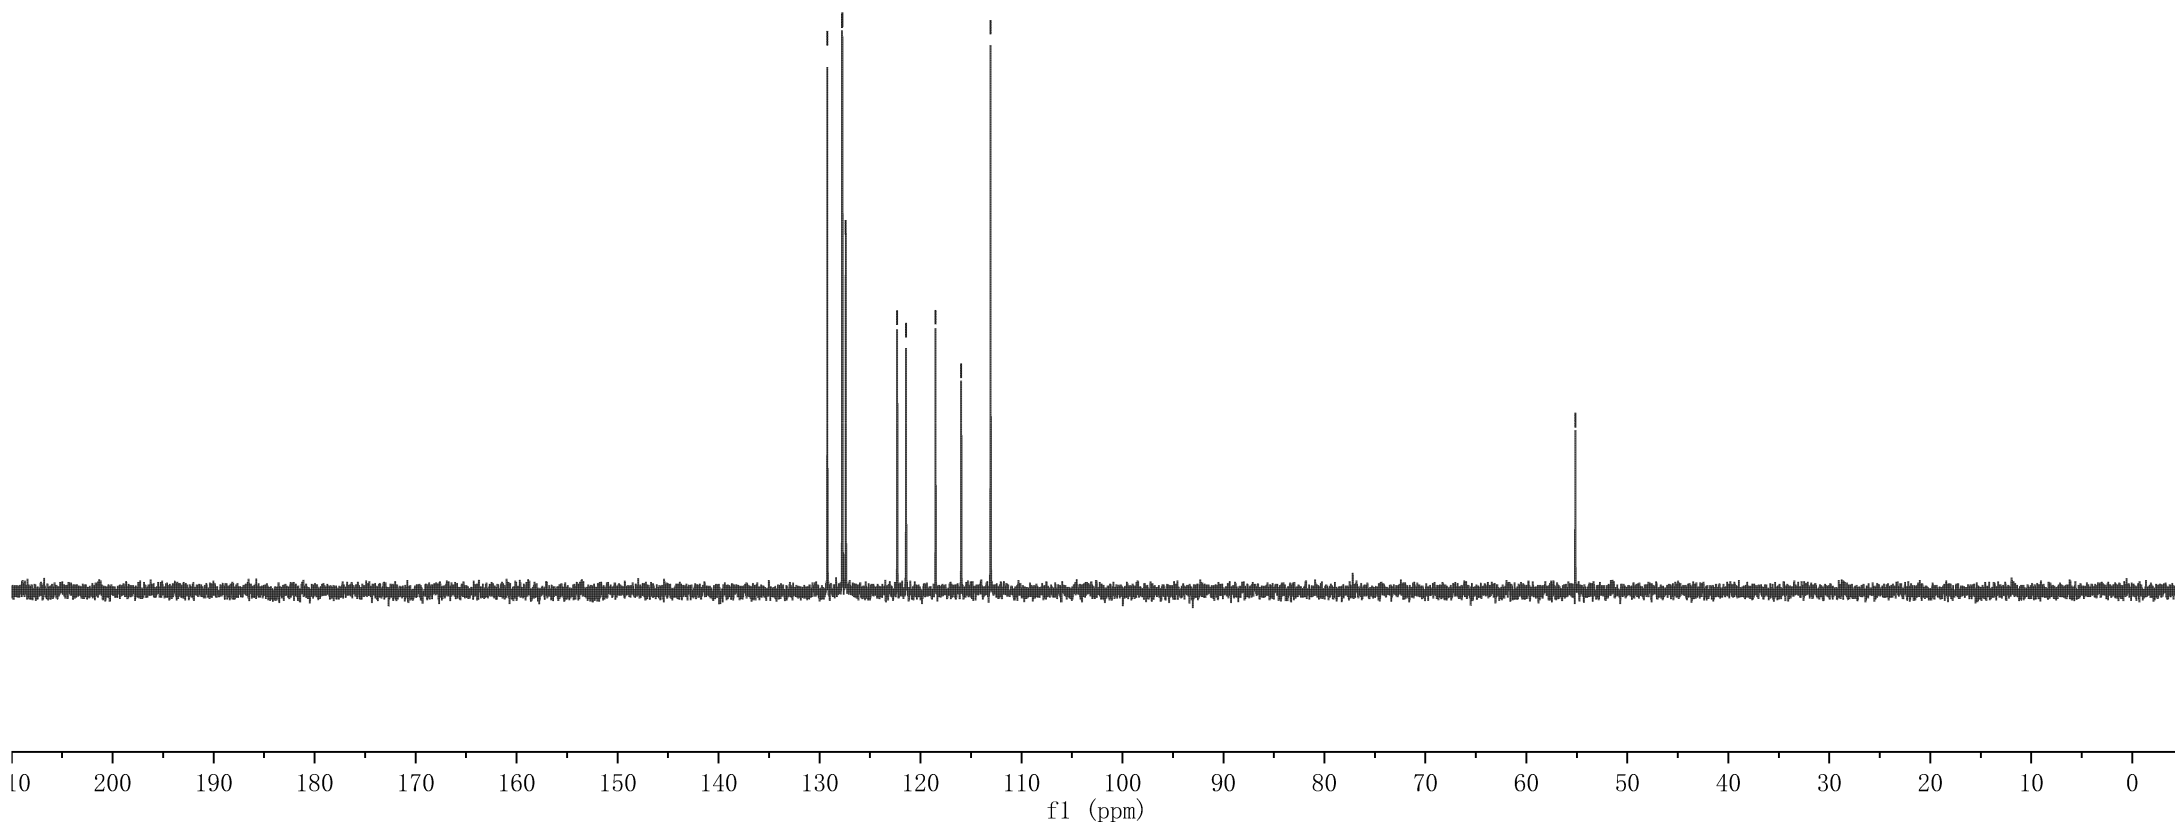

8.016  
8.013  
7.997  
7.994

7.359  
7.343  
7.341  
7.307  
7.285  
7.253  
7.047  
7.027  
7.010  
6.991  
6.972  
6.886  
6.864

3.791

| Parameter                | Value               |
|--------------------------|---------------------|
| 1 Title                  | ZJJ-14-205-H        |
| 2 Origin                 | Bruker BioSpin GmbH |
| 3 Solvent                | CDC13               |
| 4 Temperature            | 298.0               |
| 5 Number of Scans        | 10                  |
| 6 Acquisition Time       | 4.0894              |
| 7 Acquisition Date       | 2022-09-08T13:50:00 |
| 8 Spectrometer Frequency | 400.13              |
| 9 Spectral Width         | 8012.8              |

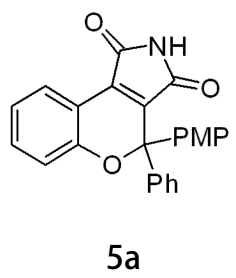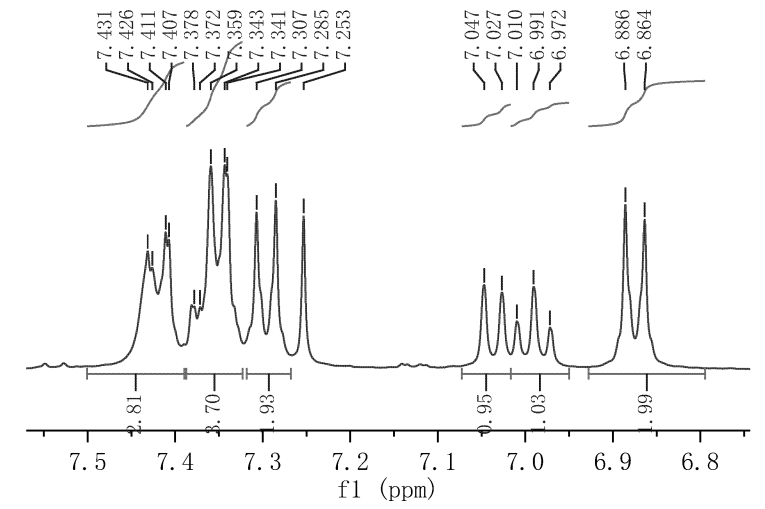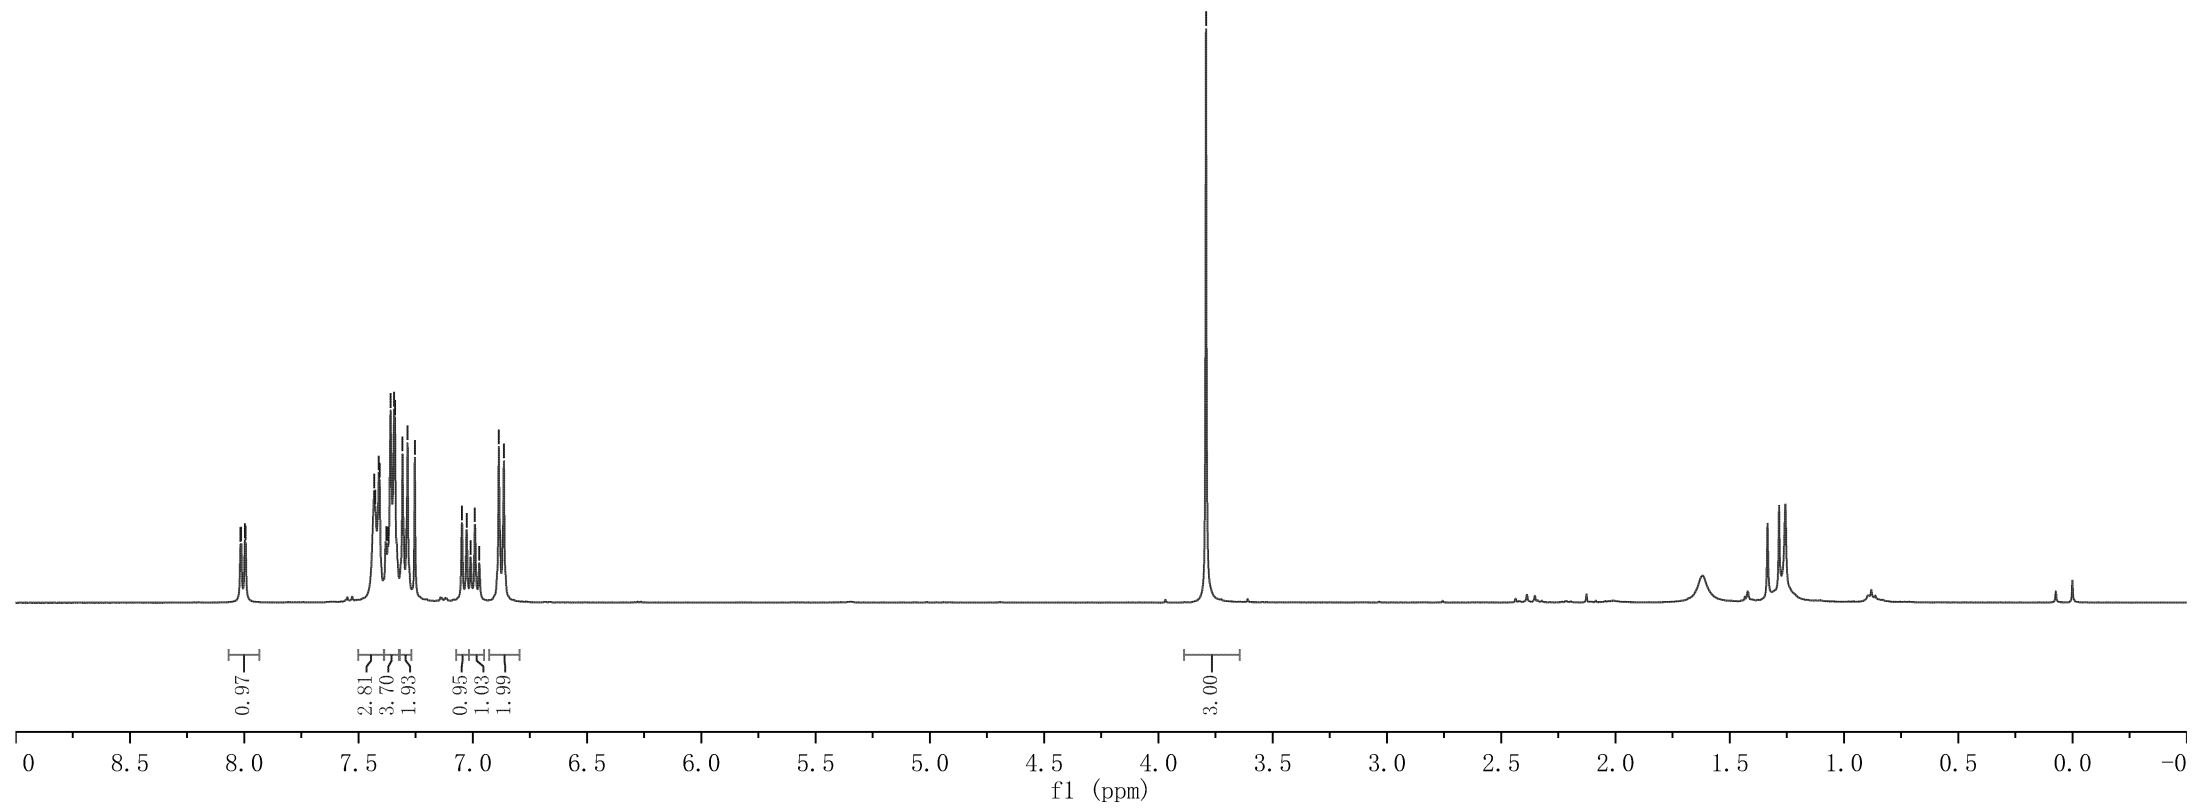



| Parameter                | Value               |
|--------------------------|---------------------|
| 1 Title                  | ZJJ-14-205-C        |
| 2 Origin                 | Bruker BioSpin GmbH |
| 3 Solvent                | CDC13               |
| 4 Temperature            | 300.0               |
| 5 Number of Scans        | 306                 |
| 6 Acquisition Time       | 1.3631              |
| 7 Acquisition Date       | 2022-09-08T13:52:41 |
| 8 Spectrometer Frequency | 100.61              |
| 9 Spectral Width         | 24038.5             |

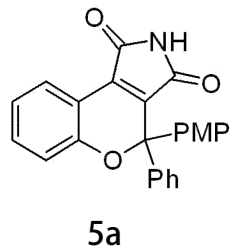

168.08  
167.68

159.71  
154.45

141.39  
133.77  
133.37  
133.26  
132.98  
129.13  
128.56  
128.23  
127.60  
126.27  
122.16  
117.09  
114.62  
113.60

83.59  
77.32  
77.00  
76.68

55.25

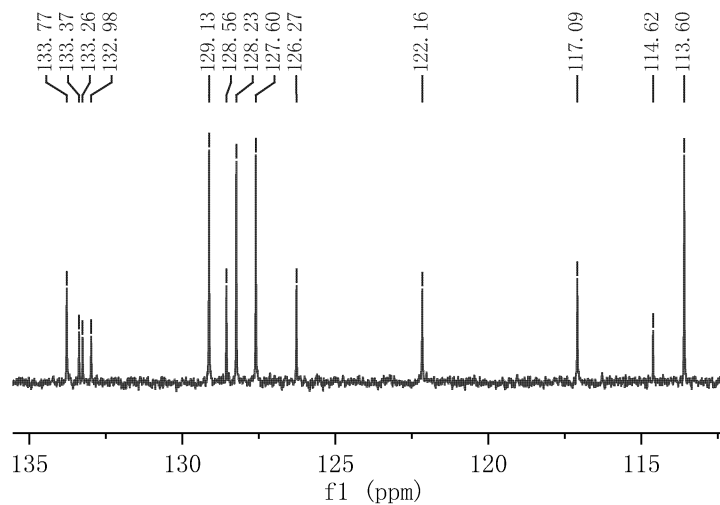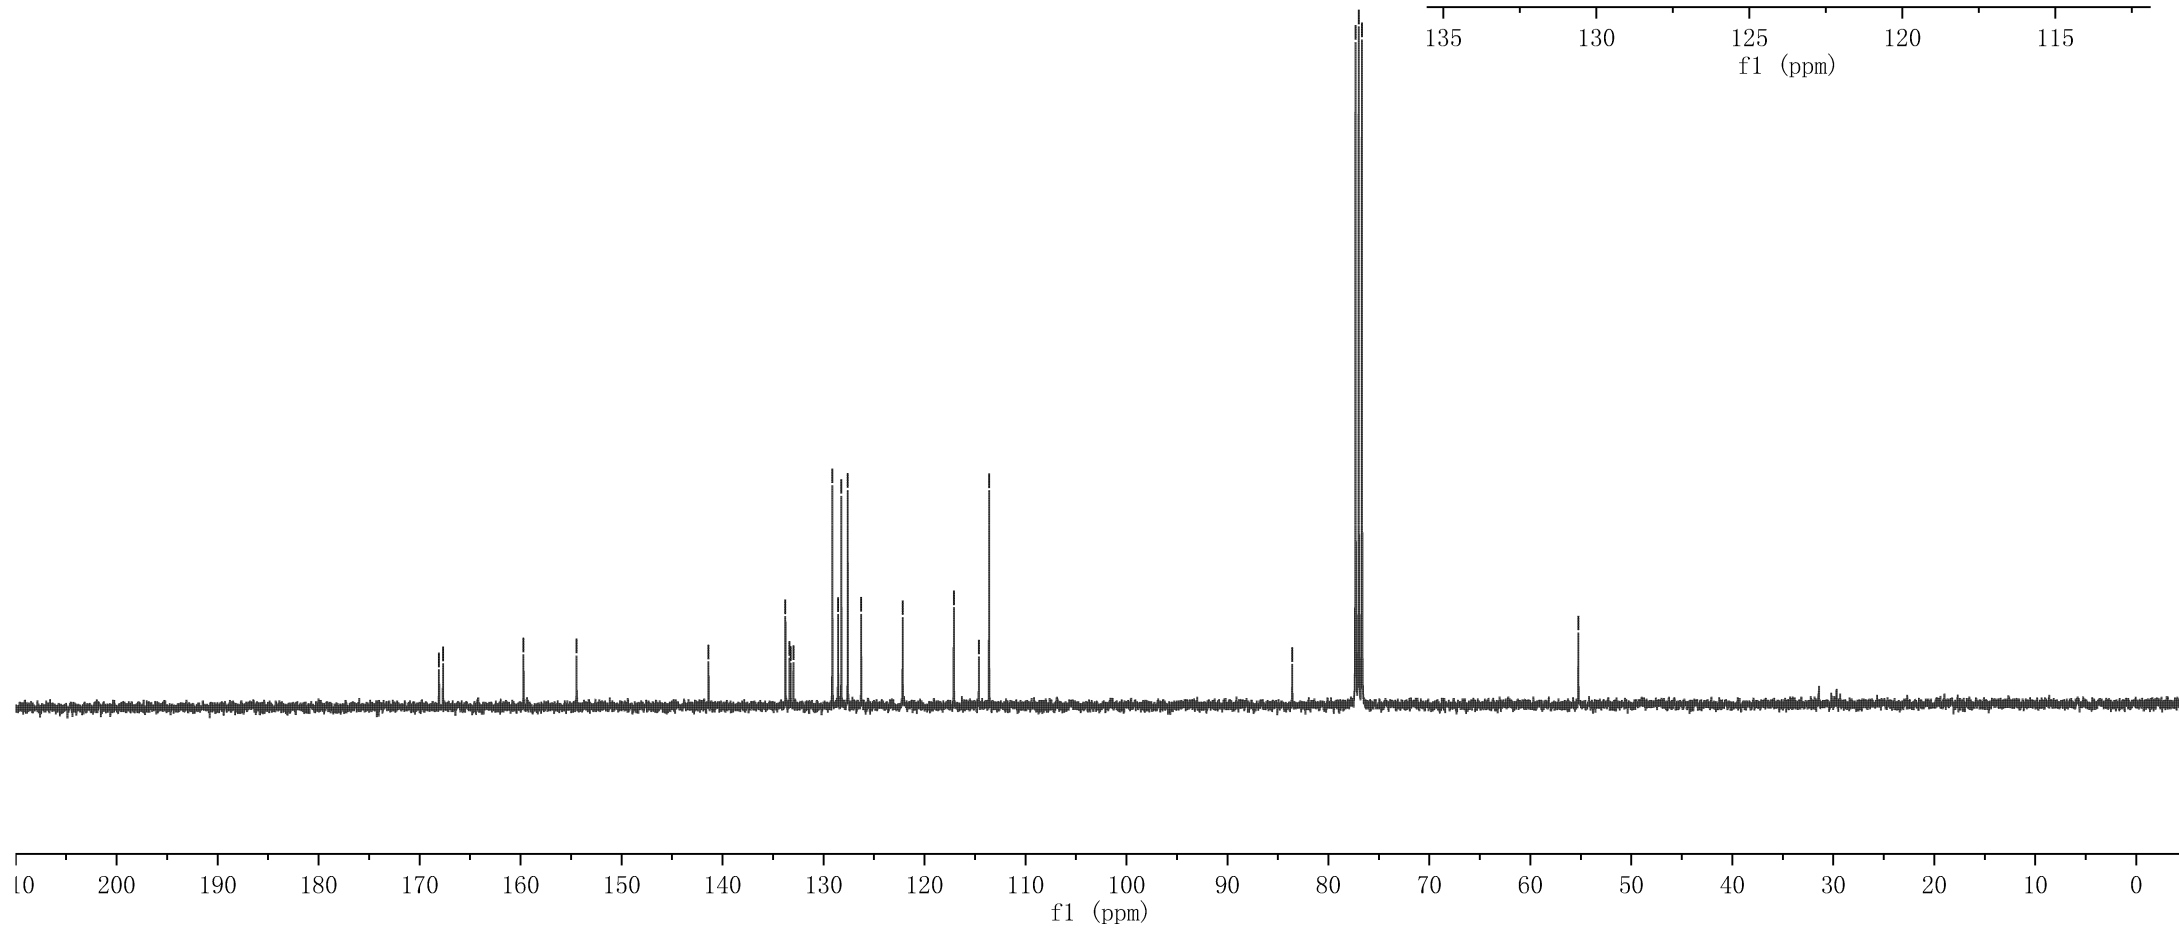

| Parameter                | Value               |
|--------------------------|---------------------|
| 1 Title                  | ZJJ-14-164-1-H      |
| 2 Origin                 | Bruker BioSpin GmbH |
| 3 Solvent                | CDCl3               |
| 4 Temperature            | 298.0               |
| 5 Number of Scans        | 19                  |
| 6 Acquisition Time       | 4.0894              |
| 7 Acquisition Date       | 2022-08-04T10:45:59 |
| 8 Spectrometer Frequency | 400.13              |
| 9 Spectral Width         | 8012.8              |

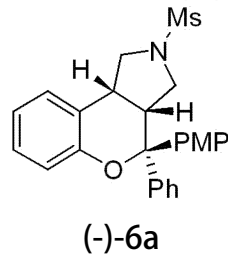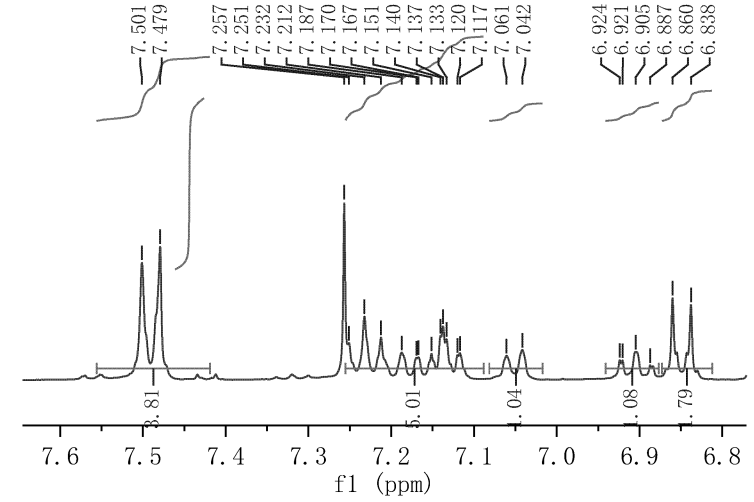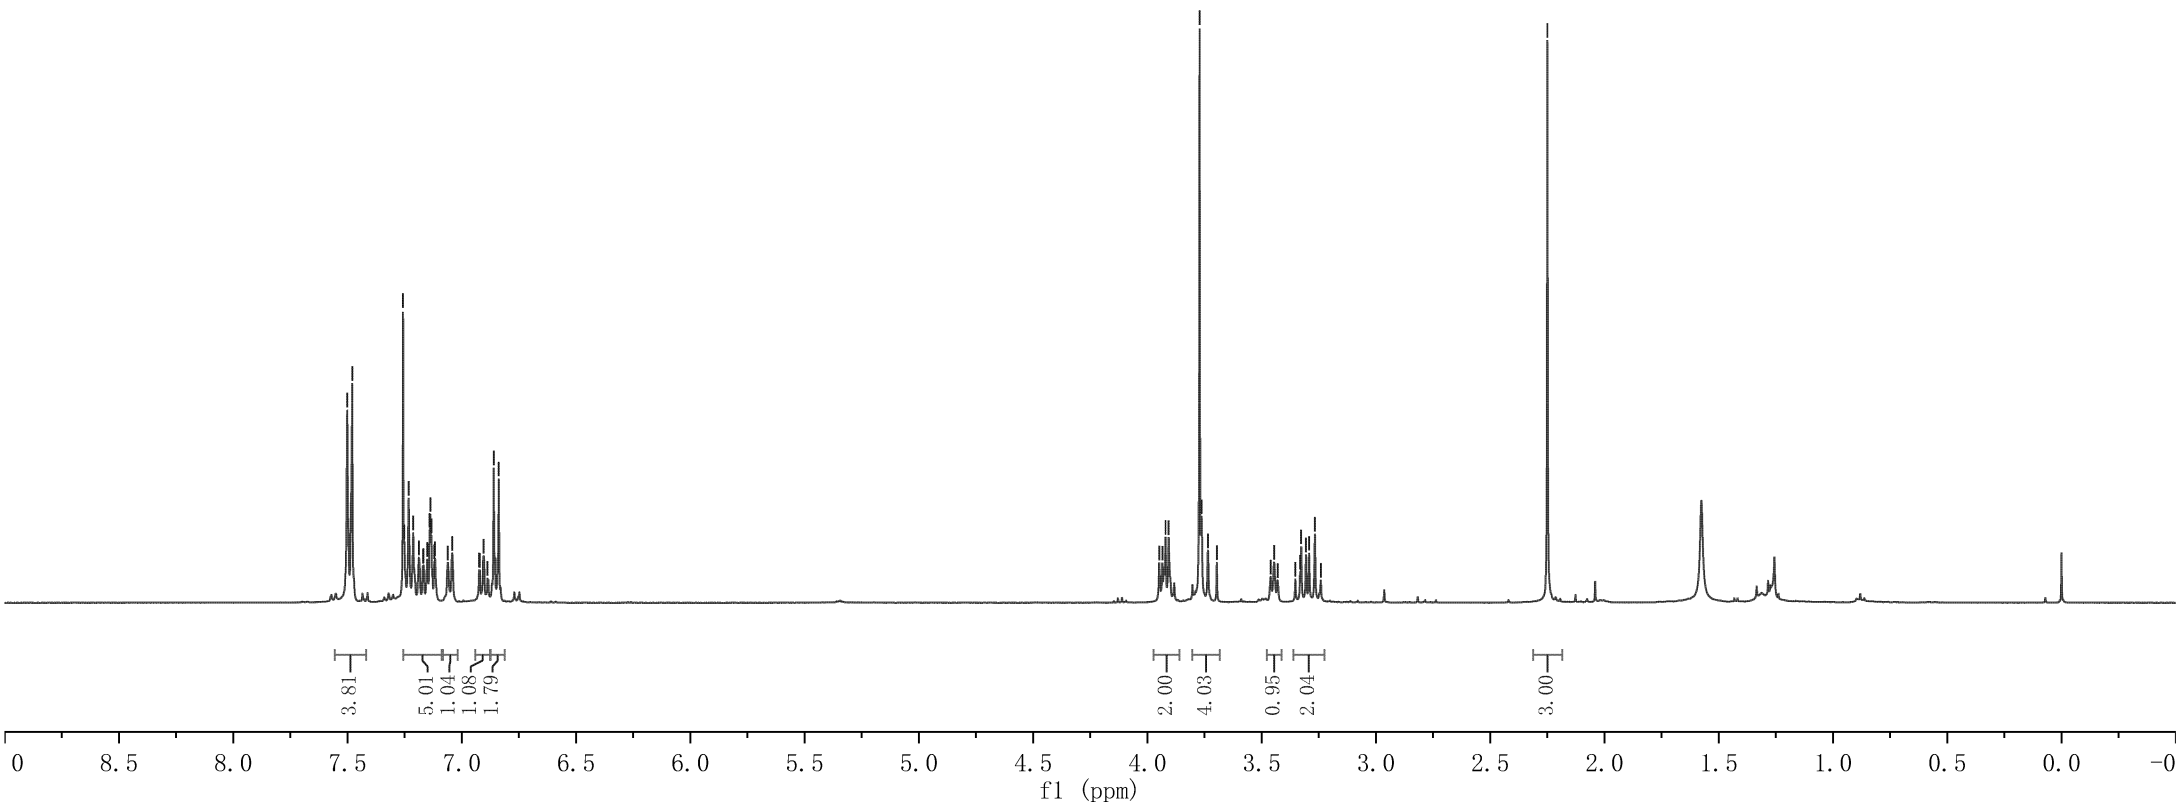

7.501  
7.479  
7.257  
7.251  
7.232  
7.212  
7.187  
7.170  
7.167  
7.151  
7.140  
7.137  
7.133  
7.120  
7.117  
7.061  
7.042  
6.924  
6.921  
6.905  
6.887  
6.860  
6.838

3.948  
3.934  
3.920  
3.907  
3.771  
3.763  
3.735  
3.696  
3.460  
3.445  
3.430  
3.352  
3.331  
3.327  
3.306  
3.292  
3.267  
3.241  
2.250

| Parameter                | Value               |
|--------------------------|---------------------|
| 1 Title                  | ZJJ-14-164-1-C      |
| 2 Origin                 | Bruker BioSpin GmbH |
| 3 Solvent                | CDC13               |
| 4 Temperature            | 300.0               |
| 5 Number of Scans        | 398                 |
| 6 Acquisition Time       | 1.3631              |
| 7 Acquisition Date       | 2022-08-04T10:48:17 |
| 8 Spectrometer Frequency | 100.61              |
| 9 Spectral Width         | 24038.5             |

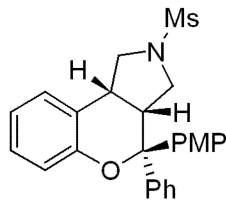

**(-)-6a**

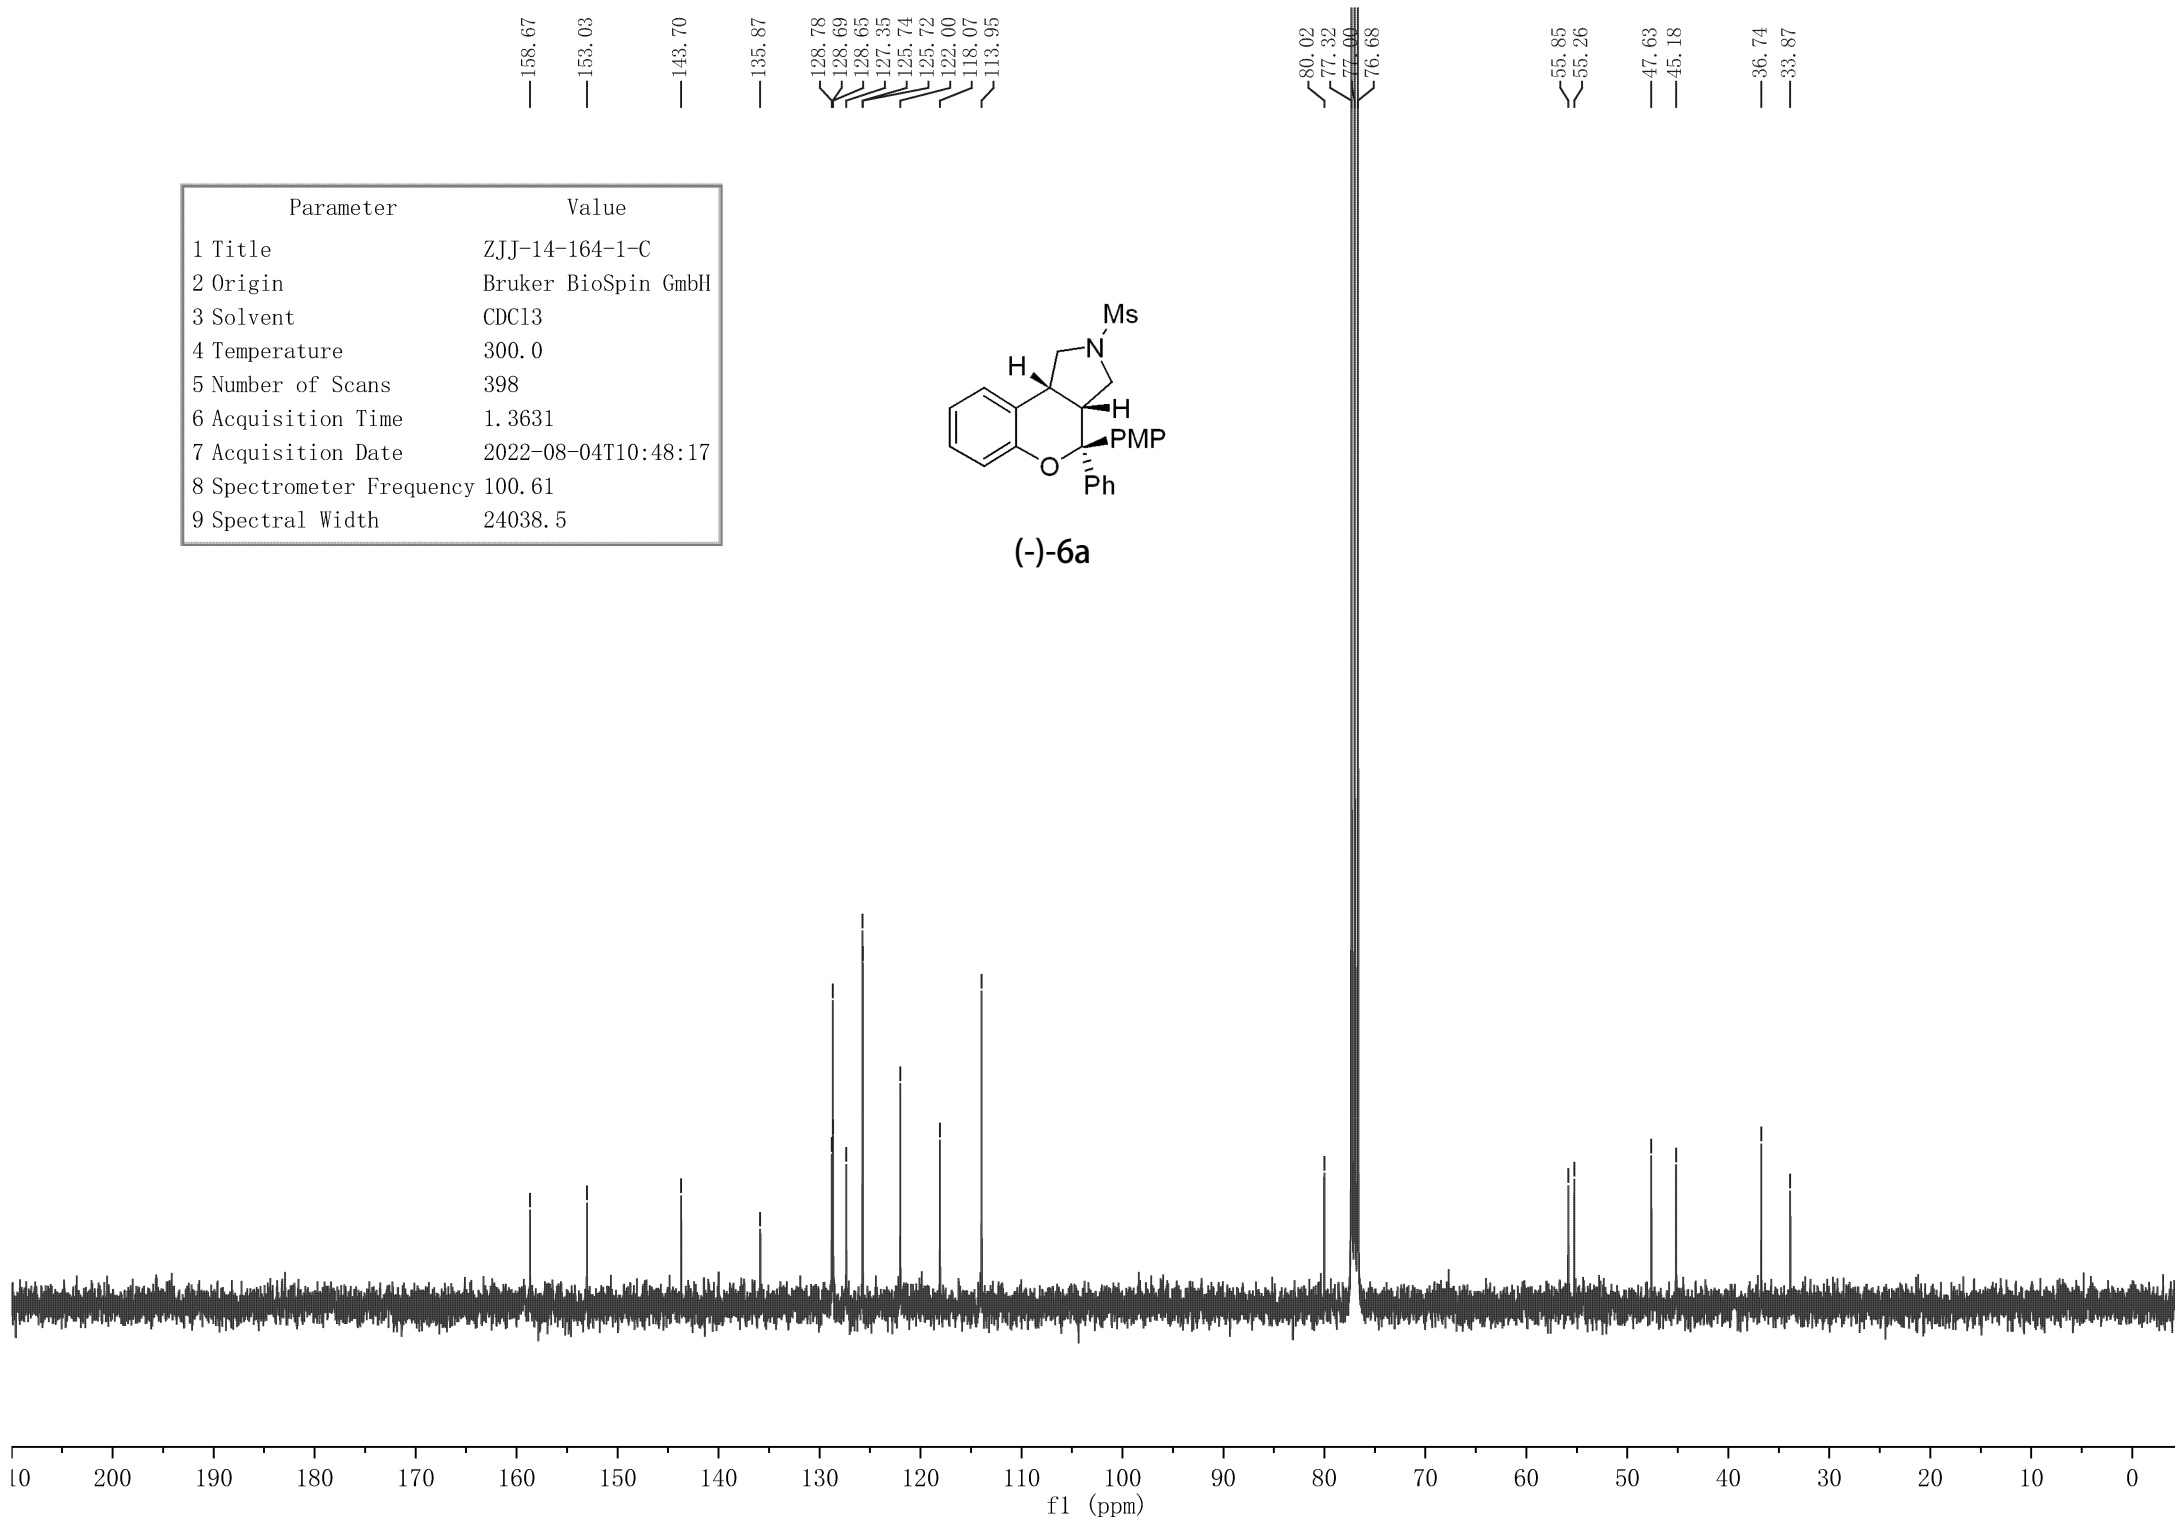

| Parameter                | Value               |
|--------------------------|---------------------|
| 1 Title                  | ZJJ-14-164-1-C-dept |
| 2 Origin                 | Bruker BioSpin GmbH |
| 3 Solvent                | CDC13               |
| 4 Temperature            | 300.0               |
| 5 Number of Scans        | 43                  |
| 6 Acquisition Time       | 1.3631              |
| 7 Acquisition Date       | 2022-08-04T11:10:44 |
| 8 Spectrometer Frequency | 100.61              |
| 9 Spectral Width         | 24038.5             |

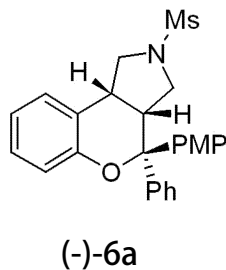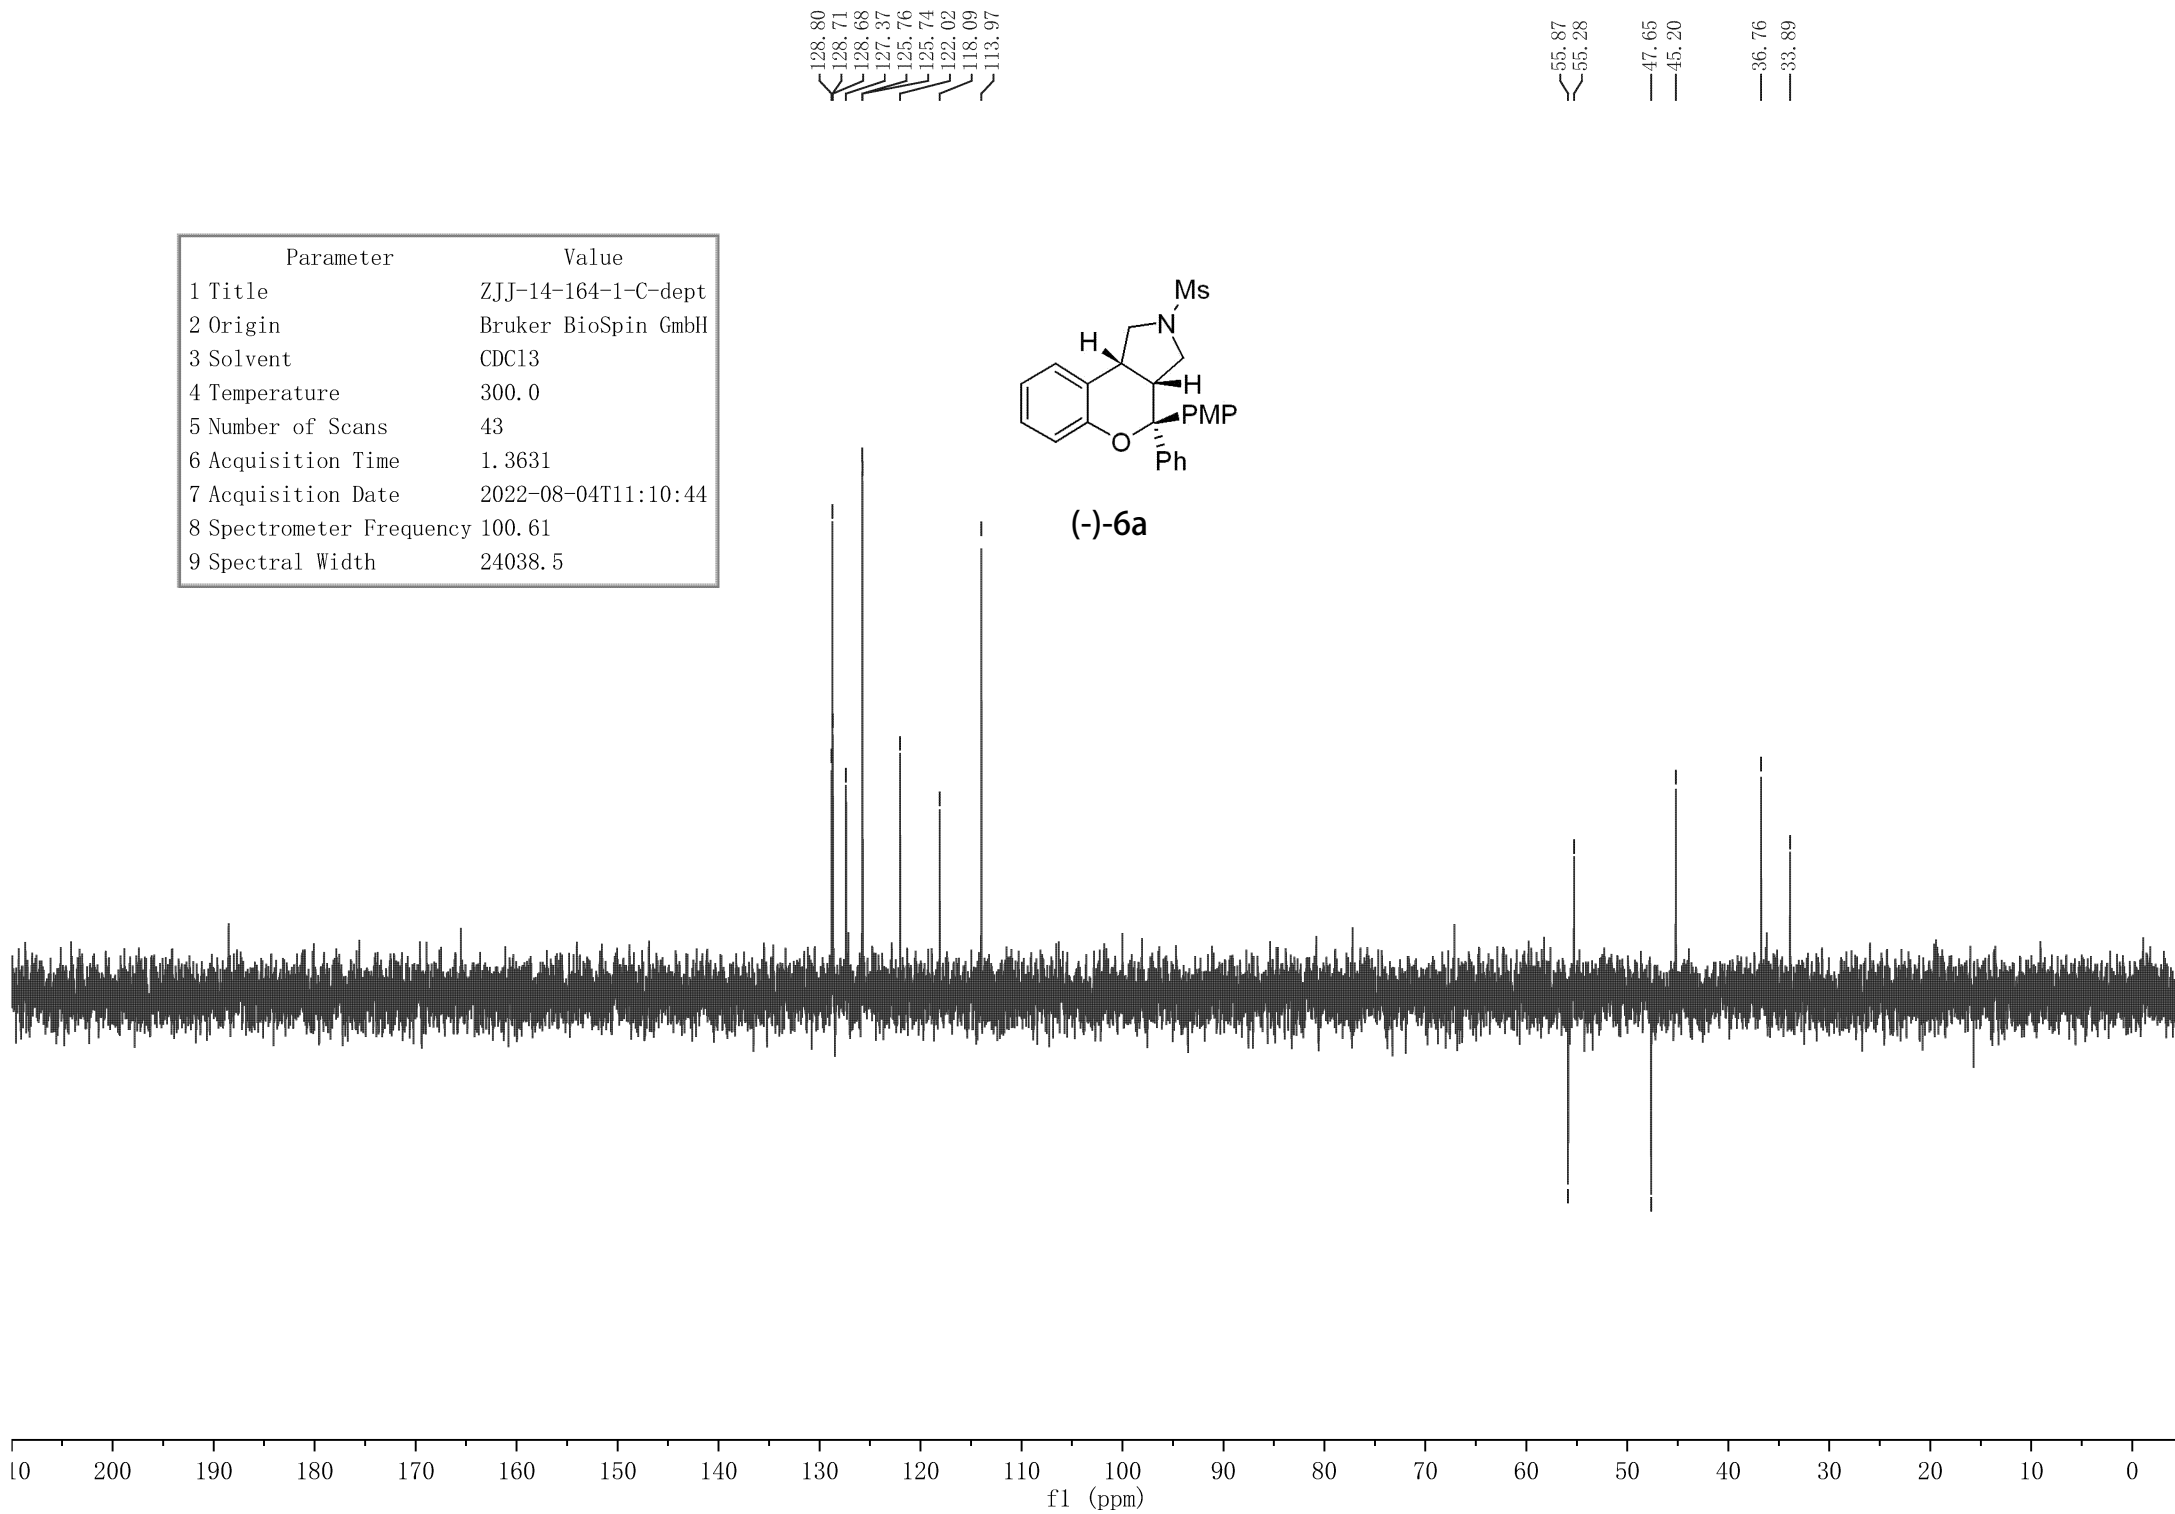

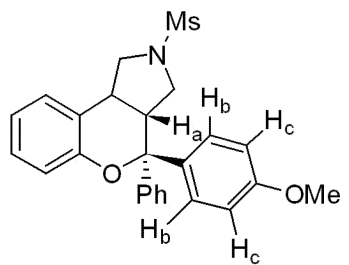

(-)-6a, NOESY, 400M, CDCl<sub>3</sub>

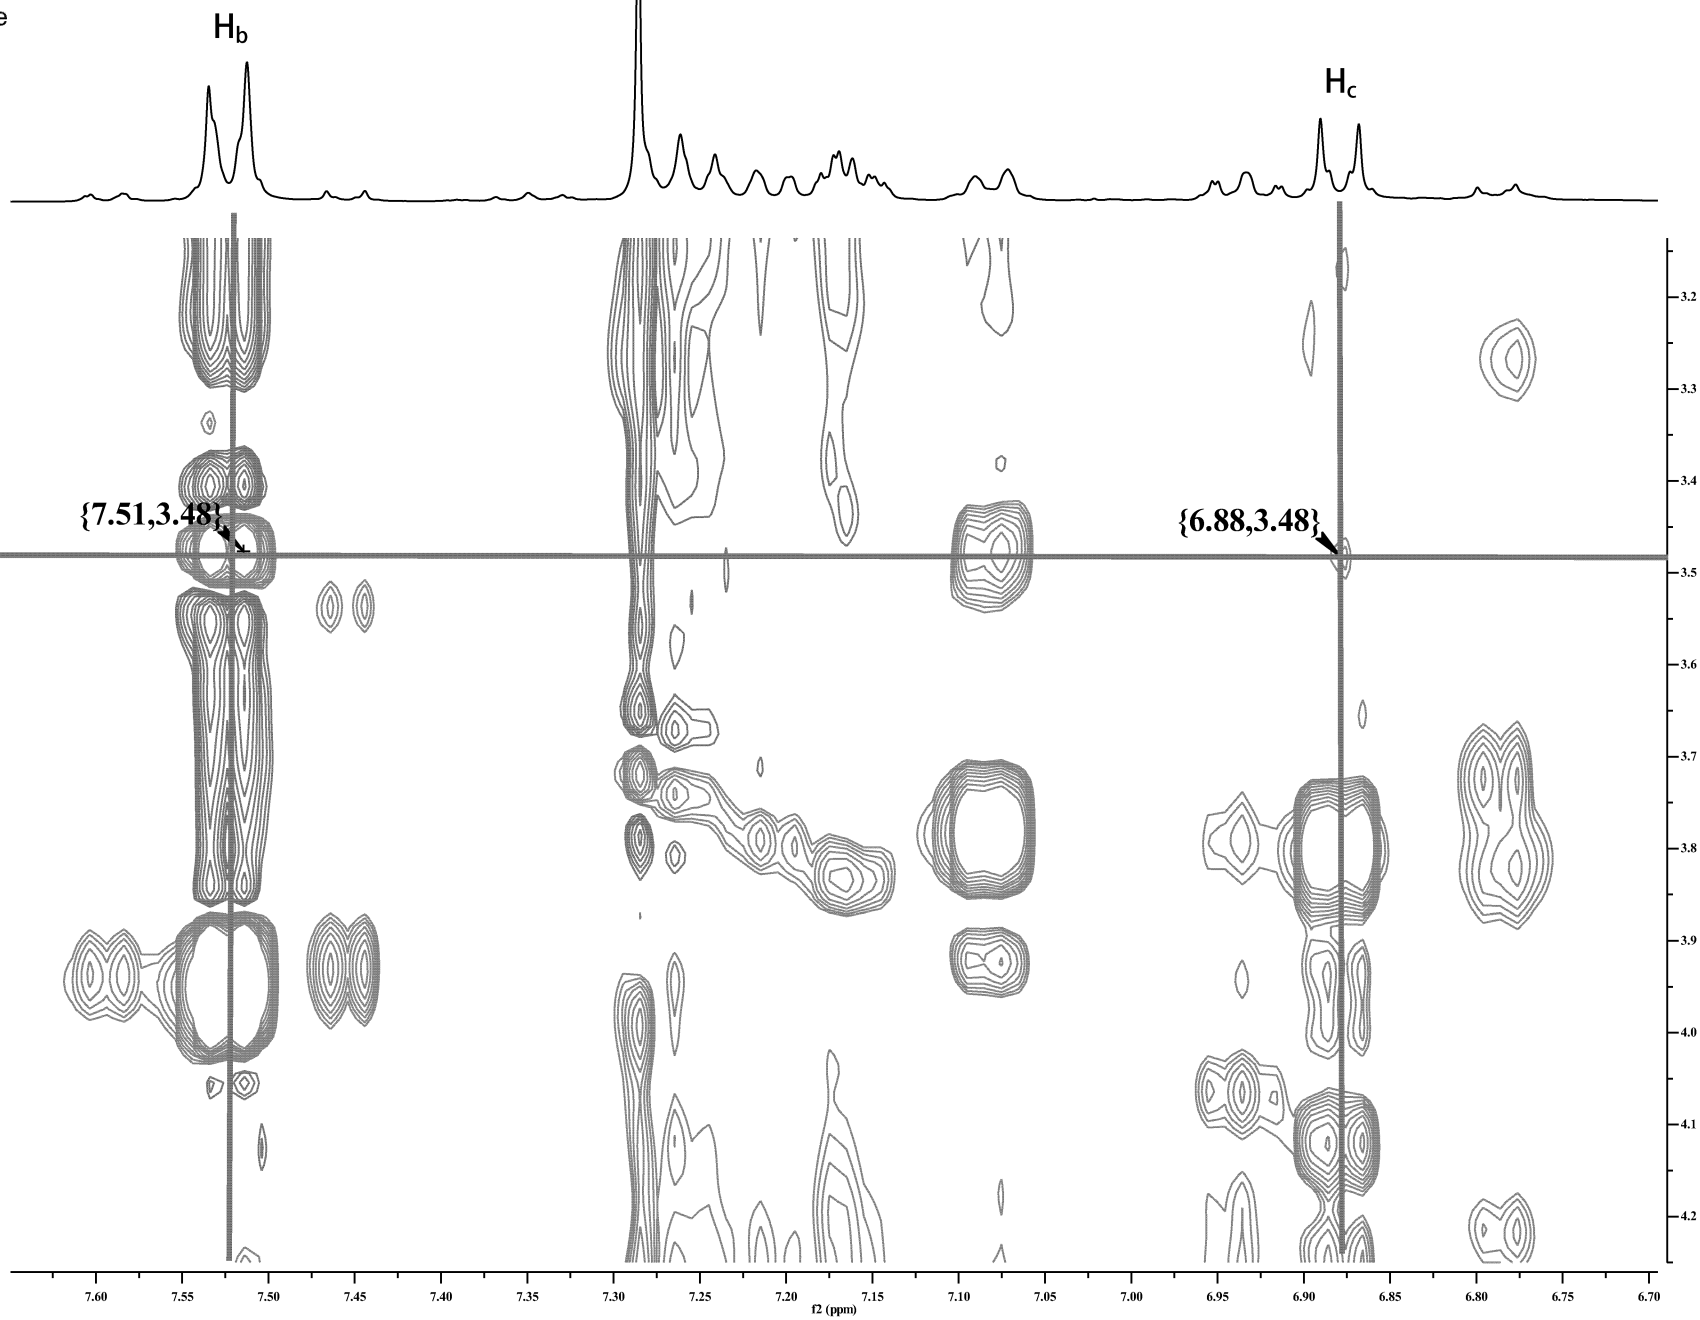

Supplement: d2sc06152j1.pdf [file d2sc06152j1.pdf]
